# Supplementary material for: Cardiac endothelial cells maintain open chromatin and expression of cardiomyocyte myofibrillar genes
Source: eLife journal article supplement (doi:10.7554/elife.55730), 2020-12-14
Supplement: supp [file elife-55730-supp-v1.zip]

Archive with 8 entries (8 files):
- elife_poa_e55730_Transparent_Reporting_File.docx
- elife_poa_e55730_Supplementary_file_1.xlsx
- elife_poa_e55730_Supplementary_file_2.xlsx
- elife_poa_e55730_Supplementary_file_3.xlsx
- elife_poa_e55730_Supplementary_file_4.xlsx
- elife_poa_e55730_Figure_3_figure_supplement_1.pdf
- elife_poa_e55730_Figure_3_figure_supplement_2.pdf
- elife_poa_e55730_Figure_4_figure_supplement_1.pdf
