# Supplementary material for: Cardiac endothelial cells maintain open chromatin and expression of cardiomyocyte myofibrillar genes
Source: eLife journal article supplement (doi:10.7554/elife.55730), 2020-12-14
Supplement: supp [file elife-55730-supp-v1.zip › elife_poa_e55730_Supplementary_file_1.xlsx]

## Sheet: EC
	p_val	avg_logFC	pct.1	pct.2	p_val_adj
Fth1	0	-1.02605	0.977	0.998	0
Malat1	9.90575e-63	0.44271	0.993	0.998	2.3121e-58
Cst3	1.16716e-93	-0.560892	0.993	0.997	2.72428e-89
Ftl1	1.40176e-157	-0.90218	0.966	0.995	3.27186e-153
Tmsb4x	7.45085e-269	0.942183	0.998	0.987	1.7391e-264
Hspa8	1.50283e-30	0.39519	0.941	0.985	3.50776e-26
B2m	1.54759e-247	0.947225	0.993	0.983	3.61224e-243
H2-D1	3.80502e-202	0.835971	0.99	0.982	8.88129e-198
Rps9	6.86401e-55	-0.323397	0.871	0.982	1.60213e-50
Hsp90ab1	8.46221e-29	0.325155	0.962	0.982	1.97516e-24
Ppia	4.73708e-44	0.339723	0.958	0.978	1.10568e-39
Gnb1	1.6383e-75	0.596107	0.959	0.977	3.82395e-71
Cd81	1.39237e-138	0.68321	0.977	0.976	3.24993e-134
Rhoa	6.82721e-08	0.317992	0.936	0.975	0.00159354
Gsn	0	-4.53081	0.839	0.972	0
Actg1	1.99004e-26	0.374697	0.951	0.97	4.64495e-22
Ptma	2.74919e-31	0.441084	0.932	0.969	6.41688e-27
Pdia3	4.32161e-58	-0.391618	0.855	0.966	1.00871e-53
Calm2	1.29836e-36	-0.296842	0.811	0.965	3.03051e-32
Rps3a	2.1662e-34	-0.26572	0.837	0.963	5.05614e-30
Ywhaz	1.36233e-09	0.301244	0.901	0.963	3.17982e-05
Cfl1	7.24464e-76	0.495409	0.935	0.962	1.69097e-71
Hmgb1	1.42056e-06	0.259668	0.892	0.962	0.0331573
Gnas	1.61847e-70	0.627428	0.952	0.959	3.77768e-66
Calm1	7.74454e-280	1.11809	0.99	0.958	1.80765e-275
Rpl10	7.94996e-102	-0.528503	0.786	0.958	1.8556e-97
Lamp1	3.36582e-38	-0.254767	0.829	0.958	7.85617e-34
Myl12a	5.47256e-94	0.637953	0.935	0.957	1.27735e-89
Ahnak	7.94535e-11	0.411525	0.948	0.957	1.85452e-06
Rpsa	2.68237e-80	-0.543083	0.824	0.956	6.26091e-76
Sepw1	1.11912e-11	0.329719	0.873	0.956	2.61214e-07
Ctsd	1.44424e-52	-0.3862	0.847	0.955	3.371e-48
Ctsb	2.32244e-97	-0.794861	0.803	0.953	5.42081e-93
Hspa5	8.11636e-114	-0.81326	0.766	0.95	1.89444e-109
Ifitm3	2.11041e-23	0.325826	0.968	0.95	4.92591e-19
Myl6	2.76684e-75	0.541785	0.925	0.946	6.45808e-71
Apoe	3.66461e-282	-3.00465	0.863	0.945	8.55356e-278
Ifitm2	3.09064e-34	0.322496	0.949	0.945	7.21386e-30
Anxa5	2.88424e-60	-0.423995	0.782	0.944	6.73211e-56
Hsp90b1	1.13568e-38	-0.272907	0.766	0.938	2.6508e-34
Ybx1	8.5913e-162	0.932129	0.935	0.936	2.0053e-157
Vim	9.49677e-100	-0.673668	0.76	0.931	2.21664e-95
Crip1	3.24695e-12	-0.309011	0.859	0.929	7.57871e-08
Calr	6.82538e-48	-0.368865	0.748	0.927	1.59311e-43
H2-K1	1.30706e-155	0.970225	0.964	0.926	3.0508e-151
P4hb	3.19679e-39	-0.291897	0.728	0.924	7.46164e-35
Gabarap	4.03055e-90	-0.500072	0.666	0.923	9.40771e-86
Gstm1	4.59828e-103	-0.91969	0.85	0.919	1.07329e-98
Cd63	0	-3.10473	0.324	0.918	0
Hnrnpa2b1	0.46109	0.351594	0.835	0.918	1
2020-09-07	1.92685e-62	-0.511935	0.645	0.916	4.49746e-58
Ywhae	0.0626561	0.291316	0.788	0.916	1
Tmbim6	1.3347e-55	0.678526	0.87	0.914	3.11533e-51
Klf13	5.21881e-14	0.424153	0.873	0.913	1.21812e-09
Cfh	0	-4.14455	0.224	0.911	0
Sparc	1.66705e-64	0.437548	0.977	0.91	3.89106e-60
Ppib	1.097e-47	-0.31613	0.67	0.909	2.56051e-43
Rbm39	0.000506649	0.416057	0.811	0.905	1
Lgals1	0	-3.10604	0.219	0.903	0
Kdelr2	1.89942e-72	-0.485162	0.673	0.903	4.43345e-68
Rac1	3.30047e-96	0.888246	0.887	0.902	7.70363e-92
Slc39a1	2.53066e-40	-0.255969	0.695	0.899	5.90681e-36
Actr2	0.778228	0.271804	0.796	0.898	1
Gnai2	1.42086e-115	0.891047	0.929	0.897	3.31642e-111
S100a11	1.7451e-38	-0.42577	0.722	0.896	4.07324e-34
Dcn	1.73394e-256	-4.78825	0.716	0.895	4.0472e-252
Tmsb10	1.63875e-31	-0.29037	0.741	0.894	3.82501e-27
Son	0.357532	0.348572	0.799	0.894	1
Tuba1a	7.72521e-35	-0.374644	0.765	0.893	1.80314e-30
Dusp1	5.7334e-29	0.288308	0.923	0.892	1.33823e-24
Itgb1	7.77962e-11	0.48978	0.856	0.892	1.81584e-06
Arglu1	1.33365e-54	0.916003	0.89	0.889	3.11287e-50
Jund	1.71876e-33	-0.345563	0.677	0.889	4.01175e-29
Txnip	3.20818e-26	0.614602	0.842	0.885	7.48821e-22
Nfia	2.18831e-129	-1.08305	0.695	0.882	5.10774e-125
Ctsl	1.76993e-35	-0.349687	0.771	0.882	4.13118e-31
Slc25a4	9.79095e-37	-0.683672	0.674	0.881	2.2853e-32
Myadm	2.33577e-36	0.850096	0.865	0.881	5.45191e-32
Tapbp	0.00537831	0.440815	0.785	0.881	1
Shfm1	0.983677	0.274479	0.741	0.881	1
Gng5	0.476443	0.265145	0.738	0.88	1
Myl12b	2.52459e-76	0.796013	0.884	0.879	5.89264e-72
Atp5j	6.12861e-80	0.642163	0.889	0.877	1.43048e-75
Rpl10a	3.78133e-50	-0.253986	0.586	0.877	8.826e-46
Ywhaq	6.23467e-09	0.469931	0.782	0.876	0.000145524
Rrbp1	1.92914e-91	-0.553819	0.579	0.875	4.5028e-87
Aldh2	1.00171e-114	-0.726202	0.502	0.871	2.33809e-110
Npm1	2.79602e-64	-0.36913	0.574	0.87	6.52619e-60
Ctsz	7.57278e-118	-0.7502	0.54	0.869	1.76756e-113
Spnb2	4.4534e-163	1.07715	0.957	0.867	1.03947e-158
Fkbp1a	1.22477e-88	0.880599	0.864	0.867	2.85874e-84
Arhgdia	0.0017542	0.285389	0.752	0.866	1
Timp2	0	-3.19679	0.206	0.864	0
Mgp	0	-4.10104	0.432	0.864	0
Ptms	3.03975e-45	-0.327542	0.612	0.864	7.09508e-41
App	3.49755e-65	0.77222	0.884	0.862	8.16363e-61
Notch2	0	-2.60946	0.11	0.861	0
Cox6a1	6.12583e-27	0.539197	0.818	0.861	1.42983e-22
Igfbp4	0	-3.21453	0.268	0.86	0
Aplp2	2.82138e-95	0.852594	0.883	0.86	6.58538e-91
Ndfip1	1.95751e-47	-0.30996	0.607	0.86	4.56903e-43
Lmna	9.79286e-123	-0.760177	0.534	0.859	2.28575e-118
Cbx3	2.43954e-38	-0.280042	0.607	0.857	5.69414e-34
Serinc3	6.06156e-38	0.639267	0.894	0.857	1.41483e-33
Tcf4	2.84137e-130	1.11434	0.937	0.856	6.63205e-126
Ndufa13	4.76807e-50	-0.400774	0.54	0.854	1.11292e-45
Dynll1	7.12137e-13	0.37757	0.797	0.854	1.6622e-08
Grn	4.15338e-47	-0.463625	0.651	0.853	9.69441e-43
Dad1	1.46428e-43	-0.280994	0.576	0.853	3.41777e-39
Arf4	3.54987e-79	-0.517416	0.526	0.851	8.28576e-75
Ptrf	5.59961e-258	1.33795	0.975	0.85	1.307e-253
Ddx5	0.00209617	0.505257	0.779	0.848	1
Fcgrt	1.3715e-85	-0.538496	0.506	0.847	3.20121e-81
Ldha	6.06904e-27	0.57488	0.821	0.846	1.41657e-22
Nfkbia	1.39253e-52	0.615404	0.879	0.845	3.2503e-48
Psma7	0.00281896	0.282676	0.692	0.845	1
Pmp22	2.4099e-268	-2.03232	0.334	0.844	5.62494e-264
Selm	4.05634e-75	-0.512647	0.549	0.844	9.4679e-71
Lamp2	2.21806e-70	-0.461739	0.543	0.844	5.17718e-66
Gpx1	6.25043e-16	-0.38134	0.7	0.844	1.45891e-11
Tsc22d3	1.97653e-69	-0.62486	0.562	0.843	4.61342e-65
Rpn2	9.49309e-62	-0.370819	0.552	0.842	2.21578e-57
Gm2a	1.00168e-243	-1.66737	0.295	0.84	2.33802e-239
Sdcbp	0.0673312	0.338107	0.71	0.839	1
Itm2c	2.7652e-75	-0.438237	0.484	0.838	6.45426e-71
Gstp1	3.18427e-92	-0.607576	0.523	0.837	7.4324e-88
Sri	0.214928	0.25917	0.681	0.837	1
Tpm4	3.68155e-125	1.10254	0.888	0.836	8.59311e-121
Prrc2c	0.00198243	0.315447	0.717	0.836	1
B4galt1	6.25375e-103	-0.89373	0.49	0.832	1.45969e-98
Sat1	6.36353e-79	-0.671253	0.535	0.829	1.48531e-74
Arpc2	8.12984e-06	0.259854	0.808	0.829	0.189759
Rpl12	2.63687e-60	-0.346984	0.531	0.828	6.15471e-56
Mt1	2.08123e-307	-3.81436	0.296	0.827	4.85781e-303
Srsf2	0.106366	0.509333	0.721	0.827	1
Ccdc80	4.69843e-295	-3.81985	0.364	0.826	1.09666e-290
Pam	4.72353e-146	-1.51917	0.525	0.826	1.10252e-141
Rnase4	0	-4.00903	0.207	0.825	0
Dstn	3.34908e-51	-0.394356	0.544	0.825	7.8171e-47
Tacc1	0.154674	0.573005	0.727	0.825	1
Emp3	0	-3.26759	0.109	0.823	0
Sdc4	4.47169e-257	-2.74964	0.392	0.822	1.04374e-252
Ywhab	0.0512783	0.438968	0.744	0.822	1
Ddost	7.35733e-87	-0.627993	0.484	0.819	1.71728e-82
Rpl29	4.0984e-05	0.390688	0.716	0.819	0.956609
S100a6	3.36262e-220	-1.819	0.412	0.818	7.8487e-216
Hexb	7.37123e-101	-1.15929	0.598	0.817	1.72052e-96
Serping1	1.45963e-305	-4.32628	0.322	0.816	3.40691e-301
Tram1	1.47901e-57	-0.288214	0.5	0.815	3.45217e-53
Crip2	1.88237e-64	0.525885	0.912	0.814	4.39363e-60
Nedd4	1.24891e-28	-0.269836	0.683	0.813	2.91508e-24
Marcks	0.338713	0.343807	0.748	0.813	1
Snx3	2.76426e-16	0.559798	0.741	0.811	6.45205e-12
Bgn	0	-3.98596	0.212	0.809	0
Ndufa3	0.339073	0.305175	0.669	0.809	1
Ecm1	8.39389e-260	-2.40095	0.289	0.805	1.95922e-255
Ltbp4	3.36522e-15	-0.395258	0.837	0.805	7.85476e-11
Serpinh1	2.24629e-12	-0.308627	0.792	0.804	5.24307e-08
Dbi	1.39868e-97	-0.722168	0.437	0.803	3.26466e-93
Snrpb	0.64071	0.270774	0.665	0.803	1
Lrrc8a	8.40988e-78	0.993334	0.88	0.802	1.96295e-73
Cebpd	9.55602e-180	-1.76346	0.382	0.801	2.23047e-175
Lrp1	0	-4.4963	0.053	0.799	0
Gpx3	9.42119e-257	-3.57912	0.372	0.798	2.199e-252
Tuba1c	1.65514e-51	-0.836991	0.562	0.798	3.86327e-47
1110003E01Rik	7.66445e-43	-0.273264	0.505	0.798	1.78896e-38
Tpm3	6.90535e-20	0.560553	0.792	0.798	1.61178e-15
Npc2	1.67561e-71	-0.543233	0.5	0.797	3.91103e-67
Pea15a	5.21132e-13	0.573135	0.753	0.796	1.21637e-08
Fstl1	3.03483e-239	-2.35562	0.344	0.795	7.0836e-235
Junb	7.44624e-96	-1.45899	0.576	0.795	1.73803e-91
Gas5	2.54621e-68	-0.396421	0.478	0.795	5.94312e-64
Zfp187	0.161799	0.382185	0.666	0.795	1
Atpif1	1.79459e-115	-0.808598	0.37	0.793	4.18874e-111
Ly6e	0	1.73057	0.98	0.792	0
Nrp1	2.50179e-266	1.68848	0.941	0.792	5.83942e-262
Cd9	2.10514e-26	-0.438936	0.668	0.791	4.91361e-22
Itgb5	1.1354e-230	-1.91246	0.265	0.789	2.65015e-226
Atp5f1	5.34749e-33	-0.325656	0.535	0.789	1.24816e-28
Dnajc3	2.1254e-49	-0.274164	0.505	0.788	4.96089e-45
Ypel3	5.42796e-46	-0.260633	0.506	0.788	1.26694e-41
Oat	1.30696e-115	-0.849749	0.397	0.787	3.05058e-111
Arpc3	5.11672e-36	0.674972	0.778	0.786	1.19429e-31
Csde1	6.50242e-05	0.337146	0.641	0.785	1
Tspan3	3.74797e-246	-1.99347	0.229	0.783	8.74814e-242
Rbx1	1.03707e-05	0.27813	0.606	0.782	0.242063
Slc25a5	0.000151023	0.374999	0.737	0.782	1
Nfib	2.0207e-10	0.445282	0.816	0.78	4.71652e-06
Xbp1	4.22224e-60	-0.402819	0.477	0.779	9.85514e-56
Cd302	4.77568e-266	-2.27926	0.178	0.777	1.11469e-261
A130040M12Rik	2.46987e-177	-1.22455	0.324	0.776	5.76493e-173
Serpinb6a	1.85471e-65	-0.39665	0.474	0.776	4.32907e-61
Anxa1	4.12261e-230	-2.29268	0.297	0.775	9.62259e-226
Tprgl	4.10349e-10	0.557215	0.715	0.774	9.57795e-06
Dazap2	0.650183	0.334513	0.676	0.774	1
Clic1	3.82179e-15	0.47115	0.75	0.773	8.92043e-11
Rcn3	0	-3.83833	0.12	0.772	0
Morf4l2	5.94105e-94	-0.731488	0.421	0.772	1.3867e-89
Rap1b	0.617089	0.290465	0.675	0.772	1
1810006K21Rik	5.94026e-96	-0.516923	0.355	0.771	1.38652e-91
Comt	6.16641e-84	-0.55125	0.445	0.771	1.4393e-79
Park7	1.09946e-41	-0.254471	0.482	0.771	2.56625e-37
Col1a2	7.58501e-308	-4.53466	0.16	0.77	1.77042e-303
Fos	5.14979e-63	-1.56186	0.587	0.77	1.20201e-58
Hmgn1	2.61375e-160	-1.18177	0.302	0.769	6.10076e-156
Anxa6	4.61901e-96	-0.647508	0.385	0.769	1.07812e-91
Dhrs3	1.17124e-28	0.549744	0.822	0.769	2.73378e-24
Atp5g1	1.61041e-23	-0.639379	0.513	0.763	3.75886e-19
Add1	6.86612e-60	-0.343712	0.46	0.762	1.60262e-55
Fxyd1	0	-3.43481	0.083	0.761	0
Mtch1	2.6611e-37	-0.324858	0.515	0.761	6.21128e-33
4921513D23Rik	0.447278	0.31176	0.665	0.76	1
Hnrnpu	0.000179347	0.326527	0.596	0.759	1
Slc29a1	1.36139e-89	-0.702254	0.388	0.758	3.17762e-85
Swi5	1.43998e-48	-0.266003	0.434	0.757	3.36106e-44
Eef1d	1.0942e-56	-0.329381	0.444	0.756	2.55397e-52
Dnaja1	3.46558e-16	0.739336	0.744	0.756	8.089e-12
Fbln1	2.3459e-264	-4.45392	0.256	0.755	5.47557e-260
Hnrnpf	6.88307e-43	0.888813	0.737	0.755	1.60658e-38
Rpn1	1.51733e-46	-0.289063	0.515	0.754	3.54159e-42
Col3a1	1.21231e-281	-4.61651	0.199	0.753	2.82966e-277
Calu	4.87298e-55	-0.424025	0.463	0.753	1.1374e-50
Celf2	0	-3.99583	0.093	0.752	0
Sod3	0	-4.43897	0.112	0.751	0
Btg2	7.37892e-33	0.431629	0.833	0.751	1.72231e-28
Lum	2.15581e-254	-4.8579	0.286	0.75	5.03188e-250
Cebpb	1.65607e-246	-2.65663	0.188	0.75	3.86544e-242
Ccni	4.03476e-98	-0.646797	0.355	0.75	9.41754e-94
Slc43a3	6.73348e-16	-0.41688	0.683	0.75	1.57166e-11
Ssr3	3.32401e-83	-0.371659	0.386	0.749	7.75856e-79
Rhoj	5.00608e-68	-0.673683	0.496	0.748	1.16847e-63
Csnk2a1	0.848133	0.512357	0.614	0.748	1
Dusp3	3.18584e-228	1.67984	0.935	0.747	7.43607e-224
Akap13	3.22097e-71	-0.478931	0.424	0.747	7.51806e-67
Ctsa	3.28988e-63	-0.741648	0.505	0.747	7.67892e-59
Sparcl1	4.47933e-224	1.10658	0.962	0.746	1.04552e-219
Dpt	7.85962e-241	-4.63945	0.304	0.745	1.83451e-236
Serinc1	2.46195e-09	0.255319	0.571	0.745	5.74645e-05
Lhfp	1.79553e-295	-3.86783	0.122	0.744	4.19095e-291
Sfr1	1.93307e-77	-0.526875	0.402	0.743	4.51197e-73
Hexa	1.72626e-107	-1.03425	0.387	0.741	4.02927e-103
Pebp1	1.0035e-65	-0.436888	0.413	0.74	2.34228e-61
Rdx	2.93824e-06	0.325771	0.582	0.739	0.0685814
Calm3	1.631e-68	-0.368243	0.387	0.738	3.80691e-64
Reep5	8.43554e-60	-0.387354	0.417	0.737	1.96894e-55
Egr1	8.08714e-26	-0.539581	0.603	0.735	1.88762e-21
Sh3glb1	1.30706e-12	0.789801	0.718	0.735	3.0508e-08
Gltscr2	0.901695	0.532386	0.643	0.734	1
Gnb2	0.0415142	0.558315	0.627	0.733	1
Tax1bp1	3.93063e-06	0.303765	0.568	0.731	0.0917448
Tomm7	0.000753279	0.289871	0.56	0.731	1
Ier2	0.0363771	-0.362001	0.709	0.731	1
Ubl5	0.657453	0.329611	0.605	0.731	1
Eif4g2	0.87137	0.418211	0.668	0.731	1
Klhl9	4.21467e-58	-0.34495	0.418	0.73	9.83746e-54
Vkorc1	1.29148e-131	-1.02454	0.296	0.729	3.01445e-127
Rpl22l1	8.78307e-114	-0.817372	0.307	0.728	2.05006e-109
Mgst1	2.05844e-222	-2.24689	0.201	0.726	4.8046e-218
Pdcd4	6.69708e-58	-0.349794	0.421	0.726	1.56316e-53
Ywhah	1.86449e-07	0.460361	0.678	0.726	0.0043519
Rpl36al	9.53919e-38	-0.254095	0.449	0.725	2.22654e-33
Nfic	4.92603e-118	-0.90883	0.314	0.724	1.14978e-113
Nenf	2.02585e-153	-1.153	0.251	0.723	4.72855e-149
Drap1	2.00365e-70	-0.537562	0.388	0.72	4.67671e-66
Clic4	2.88562e-48	1.18756	0.787	0.72	6.73532e-44
Ndufv3	2.9663e-49	-0.267012	0.41	0.719	6.92363e-45
Mbnl2	1.04802e-05	0.697428	0.674	0.719	0.244619
Axl	2.41392e-286	-3.33967	0.07	0.718	5.63434e-282
Rarres2	1.6559e-284	-3.86564	0.102	0.718	3.86503e-280
Rbp1	1.54094e-261	-2.81261	0.131	0.718	3.59672e-257
Hnrnpl	4.5015e-05	0.288297	0.582	0.717	1
Igf1	1.9974e-276	-3.88208	0.105	0.715	4.66214e-272
Kif5b	0.200351	0.375815	0.597	0.715	1
Mmp2	1.23926e-258	-4.39617	0.165	0.714	2.89256e-254
2020-09-11	6.45291e-52	-0.382839	0.426	0.714	1.50617e-47
Atox1	1.51461e-22	0.691137	0.709	0.714	3.53525e-18
Tmed3	2.58542e-147	-1.10086	0.25	0.713	6.03462e-143
Serpinf1	2.48875e-256	-4.29791	0.169	0.712	5.80898e-252
Hp1bp3	1.01327e-54	-0.355928	0.402	0.712	2.36508e-50
Mdh1	6.33474e-78	-0.920831	0.379	0.711	1.47859e-73
Ppap2b	7.11202e-60	0.798691	0.839	0.711	1.66002e-55
Rhob	1.43954e-16	0.610486	0.736	0.711	3.36004e-12
Il11ra1	1.01097e-213	-2.09475	0.179	0.71	2.3597e-209
Tpm1	0.0074146	-0.374907	0.658	0.71	1
Surf4	1.87111e-69	-0.418926	0.367	0.709	4.36736e-65
Cox7b	9.61691e-40	-0.414952	0.415	0.709	2.24468e-35
Rbbp7	6.83401e-70	-0.488638	0.378	0.708	1.59513e-65
Id3	8.91119e-62	0.448454	0.893	0.708	2.07996e-57
Sec61b	1.49119e-52	-0.359529	0.393	0.708	3.48059e-48
Chmp2a	0.0841348	0.364972	0.568	0.708	1
Cp	1.12334e-262	-2.79884	0.093	0.706	2.62198e-258
Mxra8	4.99624e-247	-2.97092	0.155	0.706	1.16617e-242
Ckb	1.28898e-114	-1.11989	0.333	0.706	3.00862e-110
Zbtb20	2.60428e-79	-0.757345	0.392	0.706	6.07866e-75
Htra3	2.30887e-262	-5.0259	0.151	0.705	5.38914e-258
Ctnna1	5.57531e-77	1.1454	0.811	0.705	1.30133e-72
Lrpap1	5.39714e-64	-0.348339	0.376	0.705	1.25975e-59
Cygb	4.35405e-285	-3.90629	0.07	0.704	1.01628e-280
Trmt112	3.28219e-81	-0.311928	0.324	0.704	7.66095e-77
Prdx5	1.5031e-142	-1.17333	0.254	0.703	3.50838e-138
Litaf	2.63752e-07	0.251682	0.538	0.703	0.00615625
Pcolce	7.7307e-213	-2.62762	0.212	0.702	1.80442e-208
Txndc5	3.76726e-160	-1.62884	0.277	0.702	8.79317e-156
Bnip3l	0.86765	0.487738	0.584	0.702	1
Ndrg2	1.32077e-253	-3.08958	0.126	0.701	3.0828e-249
Ostc	2.71035e-72	-0.481201	0.35	0.701	6.32624e-68
Manf	7.46957e-49	-0.477051	0.427	0.701	1.74347e-44
Wasf2	7.92557e-34	0.843953	0.72	0.701	1.84991e-29
Pgcp	2.02277e-253	-2.92266	0.11	0.7	4.72135e-249
1810027O10Rik	0.00579107	0.33752	0.523	0.7	1
Trf	1.80622e-113	-4.30324	0.433	0.699	4.21591e-109
Cald1	1.09496e-14	-0.297362	0.585	0.699	2.55574e-10
Wbp5	8.58859e-69	-0.537075	0.365	0.698	2.00466e-64
Nr3c1	8.05069e-08	0.305871	0.528	0.697	0.00187911
Col1a1	2.43242e-269	-4.00684	0.093	0.696	5.6775e-265
Hnrnpm	1.69245e-09	0.269118	0.546	0.696	3.95034e-05
2700089E24Rik	4.35501e-07	0.294749	0.519	0.696	0.010165
Prdx2	5.0714e-46	-0.288654	0.407	0.695	1.18372e-41
Stt3a	4.34718e-61	-0.371265	0.384	0.694	1.01468e-56
Mll2	0.646215	0.490712	0.647	0.694	1
Ifi27l2a	1.68196e-250	-3.21787	0.111	0.693	3.92586e-246
Spry2	2.49696e-117	-1.3272	0.314	0.692	5.82815e-113
Fhl1	3.60905e-187	-2.11946	0.212	0.691	8.42388e-183
Ndufa5	1.80034e-49	-0.444741	0.383	0.691	4.20218e-45
Ncoa3	1.66481e-05	0.722603	0.647	0.691	0.388584
Med28	0.0268246	0.354068	0.527	0.691	1
Gas1	3.97174e-269	-4.27986	0.083	0.69	9.27043e-265
Tecr	2.22124e-100	-0.835985	0.331	0.689	5.18459e-96
Tln1	0.809472	0.412818	0.616	0.689	1
Rhoc	0.000520218	0.57102	0.596	0.688	1
Sec11a	8.32908e-87	-0.61876	0.313	0.687	1.94409e-82
Zyx	1.07055e-27	-0.255776	0.473	0.687	2.49876e-23
Rock1	0.503163	0.468058	0.591	0.687	1
Cstb	4.27934e-93	-0.594059	0.296	0.686	9.9884e-89
Eif3c	2.40934e-14	0.285144	0.489	0.686	5.62365e-10
Rtn3	0.397968	0.611472	0.579	0.686	1
Birc6	4.27492e-05	0.542684	0.556	0.685	0.99781
Msn	6.23988e-59	1.04219	0.78	0.684	1.45645e-54
Tbrg1	1.14406e-34	-0.271607	0.455	0.684	2.67036e-30
Irf2bp2	5.48966e-111	-0.723003	0.267	0.683	1.28134e-106
Gabarapl1	3.40309e-58	-0.41581	0.387	0.683	7.94315e-54
Arf6	0.0153145	0.396621	0.579	0.683	1
Gabarapl2	0.00280415	0.536318	0.583	0.681	1
Lpl	5.50662e-72	0.944442	0.825	0.68	1.2853e-67
Anp32a	3.29813e-24	0.858609	0.696	0.679	7.69817e-20
Eif3a	4.75105e-08	0.281242	0.538	0.679	0.00110894
Actn4	4.82678e-86	1.24749	0.805	0.678	1.12662e-81
Psmc3	1.45416e-05	0.271697	0.547	0.678	0.339416
Arl6ip1	0.062466	0.414586	0.568	0.678	1
Rbms1	0.172987	0.343188	0.571	0.677	1
Cdv3	1.11577e-07	0.303777	0.527	0.676	0.00260431
H2-T23	0.000132	0.476713	0.655	0.676	1
Sdc2	4.36162e-268	-4.13366	0.059	0.675	1.01804e-263
Cnpy2	2.40002e-112	-0.850522	0.253	0.675	5.6019e-108
Olfml3	2.81735e-190	-4.46918	0.25	0.673	6.57599e-186
2900097C17Rik	1.90492e-85	-0.415988	0.306	0.673	4.44627e-81
Ece1	1.09148e-46	0.64663	0.799	0.673	2.54763e-42
Psme2	4.3974e-35	0.88353	0.704	0.673	1.0264e-30
Loxl1	4.36571e-271	-4.86644	0.058	0.672	1.019e-266
Rnh1	3.855e-72	-0.647178	0.368	0.671	8.99796e-68
Map1lc3a	4.04665e-58	-0.59016	0.357	0.669	9.44528e-54
Tmem109	0.0414915	0.387949	0.54	0.669	1
Col6a1	3.04757e-252	-4.53858	0.09	0.668	7.11334e-248
Puf60	0.000311328	0.341414	0.512	0.668	1
Lmo4	3.99562e-160	-1.37859	0.181	0.667	9.32618e-156
Ergic3	1.22815e-75	-0.539331	0.325	0.667	2.86664e-71
Cnn3	5.56572e-21	0.64677	0.709	0.665	1.29909e-16
S100a16	8.42889e-91	1.01023	0.791	0.663	1.96739e-86
Klf6	1.45716e-39	0.910968	0.727	0.663	3.40116e-35
Cdc37	3.49293e-07	0.257939	0.494	0.663	0.00815285
Tsn	4.91726e-45	-0.275076	0.376	0.662	1.14774e-40
Wdr1	0.0810207	0.392445	0.563	0.662	1
Mat2a	0.00166164	0.359653	0.545	0.66	1
Cyb5r3	3.88099e-12	0.769725	0.639	0.659	9.05862e-08
Twf1	2.17931e-06	0.260869	0.505	0.659	0.0508674
Prr13	1.72446e-10	0.673847	0.618	0.658	4.02505e-06
Scpep1	3.56441e-210	-2.17035	0.117	0.657	8.3197e-206
Tm4sf1	2.20152e-179	0.928699	0.892	0.657	5.13857e-175
Ndufc2	6.91265e-05	0.485948	0.602	0.656	1
Sumo1	6.45369e-07	0.298795	0.467	0.655	0.0150636
Mlf2	0.000484092	0.27859	0.5	0.655	1
P4ha1	3.26096e-60	-0.29481	0.341	0.654	7.61141e-56
Zeb2	9.45764e-244	-2.67412	0.053	0.653	2.20751e-239
Plin3	1.84331e-94	-0.755761	0.279	0.653	4.30247e-90
Gstm2	2.67626e-69	-0.656012	0.339	0.653	6.24666e-65
Fkbp9	3.4729e-58	-0.417133	0.354	0.653	8.10609e-54
Ctnnb1	6.74409e-85	1.29598	0.794	0.652	1.57414e-80
Tra2b	2.16067e-13	0.250973	0.474	0.652	5.04323e-09
Dync1i2	3.24078e-12	0.296098	0.499	0.652	7.56432e-08
9530068E07Rik	1.59542e-99	-0.736949	0.251	0.65	3.72388e-95
Rbms3	7.9134e-252	-3.58807	0.045	0.648	1.84707e-247
Asah1	6.03368e-50	-0.28557	0.349	0.648	1.40832e-45
Rab6a	0.921786	0.520103	0.564	0.648	1
Crispld2	9.13043e-249	-4.58289	0.064	0.647	2.13113e-244
Errfi1	2.87839e-184	-3.13083	0.184	0.647	6.71845e-180
Maged1	1.07405e-110	-0.915147	0.252	0.646	2.50693e-106
Acaa2	1.14731e-58	-0.665533	0.36	0.646	2.67793e-54
Etfb	6.8867e-33	-0.383838	0.404	0.646	1.60742e-28
Cox17	0.0635164	0.338375	0.506	0.645	1
Arl1	1.91208e-64	-0.402293	0.298	0.643	4.46299e-60
Tgfbr2	8.44406e-60	-0.441391	0.344	0.643	1.97093e-55
Macf1	0.270995	0.511569	0.586	0.643	1
Wnk1	0.772336	0.641719	0.559	0.643	1
C1ra	2.52372e-243	-4.29221	0.067	0.642	5.89062e-239
H13	2.97708e-61	-0.457374	0.332	0.642	6.94881e-57
S100a13	4.27429e-58	1.11336	0.709	0.642	9.97662e-54
Kdm6b	8.71424e-14	0.931059	0.682	0.642	2.03399e-09
Adam10	1.70962e-13	0.785491	0.666	0.642	3.99042e-09
G3bp1	0.00125394	0.404056	0.513	0.642	1
Jup	1.90447e-259	1.95373	0.914	0.641	4.44521e-255
Col6a2	1.90714e-238	-4.48227	0.075	0.641	4.45145e-234
Myh9	6.2303e-62	1.0085	0.806	0.641	1.45421e-57
Cd151	2.21719e-60	1.03073	0.729	0.641	5.17515e-56
Taok1	2.17038e-05	0.426992	0.517	0.641	0.506588
H1f0	0.0638924	0.451356	0.579	0.641	1
Dpep1	8.28663e-209	-4.52644	0.15	0.64	1.93418e-204
Nufip2	5.9754e-08	0.305411	0.491	0.64	0.00139472
Eng	3.38654e-277	1.52605	0.924	0.639	7.90453e-273
Serp1	6.54054e-80	-0.574198	0.286	0.639	1.52663e-75
Serpine2	7.52368e-216	-4.22709	0.125	0.638	1.7561e-211
Ogn	2.40035e-224	-4.36859	0.107	0.637	5.60266e-220
Fxyd5	1.94729e-33	-0.444916	0.413	0.636	4.54517e-29
Srpr	1.74438e-11	0.298647	0.46	0.636	4.07157e-07
Akap12	0.0190613	0.267595	0.577	0.636	1
C030046I01Rik	1.1928e-88	-0.538272	0.276	0.635	2.78412e-84
Zfp207	0.000419995	0.460119	0.509	0.635	1
Mfap5	5.55837e-220	-4.92662	0.118	0.634	1.29738e-215
Rab11a	3.19091e-42	1.01554	0.691	0.634	7.44791e-38
Smc1a	9.19264e-05	0.296292	0.497	0.634	1
Nr4a1	1.69559e-44	-0.767244	0.401	0.633	3.95767e-40
Sulf2	5.55808e-247	-4.00789	0.038	0.631	1.29731e-242
Hmgn2	4.57162e-85	-0.761576	0.274	0.631	1.06706e-80
Tpi1	1.39902e-77	-0.731548	0.285	0.631	3.26546e-73
Emp1	2.46175e-77	-0.785913	0.321	0.631	5.74597e-73
Rras	1.27534e-40	0.848493	0.7	0.631	2.97677e-36
Hspb1	6.90252e-184	1.36776	0.87	0.63	1.61112e-179
Nid1	7.92197e-35	-0.812538	0.462	0.63	1.84907e-30
Psme1	6.90982e-10	0.748661	0.623	0.63	1.61282e-05
Col4a1	7.6241e-123	1.27818	0.854	0.629	1.77954e-118
Hspe1	1.83032e-60	-0.478912	0.308	0.629	4.27216e-56
Copa	1.77816e-54	-0.347697	0.34	0.629	4.1504e-50
H47	3.04433e-144	-1.36653	0.175	0.628	7.10577e-140
Dst	0.813621	0.554598	0.556	0.628	1
Gpm6b	6.90208e-223	-4.16092	0.088	0.627	1.61101e-218
Id2	8.88296e-98	-1.39633	0.285	0.627	2.07337e-93
Gbas	7.18859e-51	-0.375136	0.331	0.627	1.67789e-46
Pdlim2	2.33351e-221	-3.27874	0.078	0.625	5.44665e-217
Eif4g1	0.000255931	0.355911	0.506	0.625	1
Mcl1	0.716811	0.254392	0.579	0.625	1
Dhrs7	4.28106e-47	-0.347248	0.341	0.624	9.99241e-43
Tspan31	2.9928e-43	-0.277815	0.343	0.624	6.9855e-39
Klf2	1.99529e-155	1.43407	0.861	0.623	4.6572e-151
Ugp2	1.06623e-157	-1.80538	0.161	0.622	2.48869e-153
Fuca1	3.77287e-80	-0.613709	0.285	0.622	8.80627e-76
Mapre1	0.329802	0.534735	0.511	0.622	1
Tmem119	3.0885e-133	-3.61033	0.278	0.621	7.20886e-129
Nap1l1	8.12305e-72	-0.414358	0.288	0.621	1.896e-67
Ppp1r2	3.57403e-59	1.25646	0.708	0.621	8.34213e-55
Fbln5	4.1813e-138	-1.13861	0.195	0.62	9.75957e-134
Capn2	0.00621031	0.629296	0.569	0.62	1
Tcf7l2	1.62231e-72	-0.429472	0.277	0.619	3.78663e-68
Sec31a	1.24624e-66	-0.385202	0.302	0.619	2.90886e-62
Selenbp1	1.3375e-199	-2.48605	0.095	0.618	3.12186e-195
2610001J05Rik	8.81313e-54	-0.348299	0.307	0.618	2.05707e-49
1810037I17Rik	0.0953431	0.47061	0.537	0.618	1
Nhp2l1	0.000208854	0.338912	0.462	0.617	1
Atp1a2	2.09099e-223	-3.4119	0.062	0.616	4.88057e-219
Camk2n1	5.93772e-134	-1.47675	0.196	0.616	1.38592e-129
Atxn10	2.12081e-120	-1.2292	0.223	0.616	4.95018e-116
Cbx5	2.18693e-89	-0.715393	0.257	0.616	5.1045e-85
Cct7	0.000668412	0.332398	0.489	0.616	1
C1s	3.0067e-211	-3.70247	0.095	0.615	7.01794e-207
Lrrc61	2.51981e-203	-0.550301	0.057	0.615	5.88149e-199
Cdkn1a	3.29182e-110	1.20417	0.801	0.615	7.68343e-106
1110004F10Rik	2.01518e-50	-0.28831	0.329	0.615	4.70363e-46
Rnf130	1.38143e-06	0.711723	0.591	0.615	0.032244
Tnfrsf1a	0.28112	0.509796	0.539	0.615	1
Fkbp7	1.18398e-135	-1.38931	0.182	0.614	2.76352e-131
Gaa	4.64918e-128	-1.13424	0.189	0.614	1.08517e-123
Prdx4	6.68226e-83	-0.69206	0.249	0.614	1.55971e-78
0610031J06Rik	2.11275e-05	0.291436	0.458	0.614	0.493138
Ddx3x	0.00091323	0.875108	0.59	0.614	1
Brp44	8.16279e-78	-0.711899	0.263	0.612	1.90528e-73
Ehd2	4.40064e-186	1.59956	0.856	0.611	1.02715e-181
Raly	0.454107	0.436268	0.531	0.61	1
Lsp1	1.09648e-191	-4.26029	0.13	0.609	2.55929e-187
Dap	6.33474e-149	-1.60407	0.162	0.609	1.47859e-144
Etfa	3.63015e-89	-0.848329	0.251	0.609	8.47312e-85
Atp6ap2	3.38493e-63	-0.418949	0.286	0.609	7.90077e-59
Os9	6.87652e-55	-0.432394	0.302	0.609	1.60505e-50
Ppap2a	4.90438e-16	0.832475	0.614	0.609	1.14473e-11
Akap2	1.96162e-101	1.23686	0.818	0.608	4.57863e-97
Rcn1	7.68335e-94	-0.888365	0.241	0.608	1.79337e-89
Hspd1	1.93616e-39	-0.268907	0.35	0.608	4.51918e-35
Abca8a	6.22253e-229	-4.05788	0.042	0.606	1.4524e-224
Ddr2	5.20994e-215	-3.5556	0.068	0.606	1.21605e-210
Tsc22d1	7.84633e-96	1.33467	0.758	0.606	1.83141e-91
Pan3	0.255665	0.58466	0.517	0.606	1
Tcf21	9.48067e-238	-4.06793	0.022	0.604	2.21288e-233
Islr	1.65221e-219	-5.08574	0.069	0.604	3.85642e-215
Ramp2	1.49458e-106	1.08378	0.786	0.604	3.4885e-102
Adipor1	1.44755e-75	1.1438	0.736	0.604	3.37873e-71
Hn1	1.87688e-72	-0.74517	0.284	0.604	4.38083e-68
Ddah2	1.31655e-38	-0.467667	0.373	0.604	3.07295e-34
Mtpn	0.0615413	0.548854	0.487	0.604	1
Pdgfra	2.31875e-218	-3.60282	0.057	0.603	5.41219e-214
Tmem176b	2.97698e-93	-1.76351	0.299	0.603	6.94857e-89
Use1	9.12295e-48	-0.332088	0.322	0.603	2.12939e-43
Matn2	5.38669e-223	-4.74925	0.054	0.602	1.25731e-218
Ecm2	2.59397e-100	-1.25649	0.251	0.602	6.05458e-96
9130011J15Rik	8.07612e-62	-0.481912	0.284	0.602	1.88505e-57
Chmp3	5.2147e-09	0.31008	0.455	0.602	0.000121716
Foxp1	0.693414	0.496178	0.525	0.602	1
Vps28	3.4459e-08	0.31981	0.425	0.601	0.000804306
Ltbp1	1.06033e-147	-1.6705	0.16	0.6	2.47491e-143
Lamc1	4.97693e-72	-1.02367	0.302	0.6	1.16167e-67
Gas7	5.88306e-186	-3.76342	0.132	0.598	1.37316e-181
Tpd52l2	1.69116e-55	-0.440672	0.301	0.597	3.94733e-51
Eif3g	6.67705e-07	0.296906	0.437	0.597	0.0155849
Lpp	9.47625e-76	-0.457632	0.257	0.596	2.21185e-71
Dnajc8	0.193092	0.49101	0.506	0.596	1
Mcmbp	0.614316	0.57765	0.528	0.596	1
Fgfr1	2.58218e-169	-1.95426	0.114	0.595	6.02707e-165
Bst2	1.82438e-92	1.28395	0.737	0.595	4.25829e-88
Clec3b	1.12837e-209	-4.75985	0.076	0.593	2.63373e-205
Fkbp2	7.27383e-134	-1.36599	0.151	0.593	1.69778e-129
Cdk2ap2	2.61181e-122	-1.23355	0.179	0.593	6.09623e-118
Crtap	7.71871e-69	-0.656611	0.268	0.593	1.80162e-64
Rcn2	5.06149e-39	-0.252272	0.324	0.593	1.1814e-34
Spop	3.42866e-08	0.316467	0.433	0.593	0.000800283
Sgce	1.90545e-109	-1.09076	0.198	0.592	4.44751e-105
Snx18	6.05148e-151	-1.83213	0.143	0.591	1.41248e-146
Wls	1.77219e-119	-0.931016	0.179	0.59	4.13647e-115
Bnip2	0.0019322	0.704608	0.533	0.59	1
Scn7a	4.94379e-222	-4.14135	0.033	0.588	1.15393e-217
Cryab	1.08779e-155	-2.11686	0.129	0.588	2.539e-151
Gstt1	1.33142e-142	-1.67666	0.15	0.588	3.10767e-138
Tppp3	3.355e-67	-1.04279	0.302	0.588	7.8309e-63
Add3	3.29031e-51	-0.334413	0.314	0.588	7.67992e-47
Rab1b	4.06236e-05	0.317929	0.486	0.588	0.948196
Zbtb7a	0.0477125	0.423673	0.507	0.588	1
Pcolce2	1.31004e-201	-4.20772	0.078	0.586	3.05776e-197
Lgals3bp	0.371557	0.425235	0.537	0.586	1
Gorasp2	1.07811e-60	-0.53132	0.29	0.585	2.51642e-56
Mtap4	0.0516464	0.794344	0.539	0.585	1
Mcfd2	1.32406e-46	-0.304537	0.304	0.584	3.09048e-42
Gm5506	0.000247121	0.553853	0.445	0.584	1
Ostf1	6.42403e-23	0.847204	0.607	0.583	1.49943e-18
2510006D16Rik	2.9862e-12	0.260496	0.405	0.583	6.9701e-08
Acat1	1.46139e-63	-0.579633	0.282	0.582	3.41103e-59
Ndufa8	1.14774e-28	0.80264	0.624	0.582	2.67895e-24
Tmem30a	0.0175695	0.36073	0.496	0.582	1
Pdia4	4.72436e-63	-0.54538	0.278	0.581	1.10271e-58
Gpx8	1.11003e-205	-3.33627	0.054	0.58	2.59092e-201
Stub1	3.1473e-40	-0.301775	0.307	0.58	7.34612e-36
Ewsr1	3.40115e-06	0.317851	0.44	0.58	0.0793863
Ptov1	1.35394e-96	-1.01109	0.209	0.579	3.16024e-92
Rab10	9.76914e-08	0.410561	0.431	0.579	0.00228021
Slc1a5	4.23644e-169	-2.34373	0.105	0.578	9.88827e-165
Pros1	5.18541e-08	0.250179	0.437	0.578	0.00121033
Ube2r2	7.46522e-08	0.334854	0.424	0.578	0.00174246
Lama2	1.47172e-209	-4.05866	0.045	0.577	3.43514e-205
Maged2	2.76897e-163	-2.52364	0.121	0.577	6.46304e-159
Qk	6.00025e-77	1.42296	0.744	0.577	1.40052e-72
Brp44l	9.50845e-57	-0.46694	0.268	0.577	2.21937e-52
Prnp	2.74367e-28	-0.523218	0.352	0.577	6.404e-24
Psmd2	1.11119e-13	0.276966	0.388	0.577	2.59364e-09
Pmepa1	4.06621e-158	-1.92452	0.112	0.576	9.49094e-154
Ccpg1	1.08561e-57	-0.316948	0.268	0.576	2.53392e-53
Psmb8	4.03931e-35	0.912808	0.665	0.576	9.42816e-31
Bicc1	5.4706e-203	-3.46346	0.051	0.575	1.27689e-198
Mmp14	4.60681e-183	-2.73916	0.087	0.575	1.07528e-178
Gng10	3.25258e-128	-1.33573	0.154	0.575	7.59184e-124
Lgmn	4.95758e-60	-2.00592	0.346	0.574	1.15715e-55
Tnfsf12	6.31904e-50	-0.310511	0.279	0.574	1.47493e-45
Syf2	0.540142	0.580009	0.497	0.574	1
Copb2	2.73847e-62	-0.395075	0.262	0.572	6.39186e-58
Glg1	7.38608e-59	-0.341082	0.263	0.572	1.72398e-54
Epb4.1l2	8.7e-50	-0.368383	0.309	0.572	2.03067e-45
Srsf11	5.58819e-09	0.273976	0.424	0.572	0.000130434
Fbn1	1.47495e-122	-2.02705	0.191	0.571	3.44268e-118
Creg1	2.05662e-120	-1.10552	0.166	0.571	4.80036e-116
Por	4.22729e-75	-0.841853	0.256	0.571	9.86692e-71
Mprip	2.68721e-08	0.693641	0.591	0.571	0.000627222
Hbxip	0.000709466	0.30673	0.438	0.571	1
Col15a1	1.03623e-152	-2.16449	0.114	0.57	2.41867e-148
Il6st	3.79574e-63	-0.506778	0.27	0.57	8.85965e-59
Hdlbp	4.42489e-58	-0.445347	0.286	0.57	1.03281e-53
Entpd2	1.1969e-194	-4.86141	0.075	0.569	2.79368e-190
Pten	2.43044e-57	-0.485422	0.274	0.569	5.67288e-53
Fam3c	6.27163e-09	0.305279	0.427	0.569	0.000146386
Leprot	0.00127711	0.399169	0.443	0.569	1
Eps15	2.46057e-78	-0.73303	0.234	0.568	5.74322e-74
Fkbp4	7.04468e-07	0.267738	0.415	0.568	0.016443
Olfr1033	7.66432e-209	-3.23331	0.029	0.567	1.78893e-204
Idh3g	1.57807e-36	-0.268828	0.319	0.567	3.68337e-32
Yipf4	2.50231e-14	0.257492	0.358	0.566	5.84063e-10
Rbm8a	0.344099	0.442866	0.477	0.566	1
Oaf	6.95029e-193	-4.02136	0.068	0.565	1.62227e-188
Gstm5	1.68093e-189	-3.2342	0.065	0.565	3.92346e-185
Ppt1	1.3595e-84	-0.997228	0.235	0.565	3.1732e-80
Copz1	1.48044e-38	-0.311352	0.322	0.565	3.4555e-34
Copz2	7.86571e-45	-0.388949	0.291	0.564	1.83594e-40
Nras	1.54229e-25	1.09334	0.627	0.564	3.59987e-21
Ddx17	0.00708833	0.506067	0.471	0.564	1
Arhgdib	1.1789e-83	-1.88712	0.274	0.563	2.75167e-79
Tmod3	1.96543e-36	1.04619	0.672	0.563	4.58751e-32
BC031181	2.08506e-06	0.373502	0.401	0.562	0.0486675
Cnn2	0.0297542	0.368355	0.543	0.562	1
Htra1	2.09615e-164	-2.38381	0.103	0.561	4.89263e-160
Capg	5.43222e-110	-1.55784	0.189	0.561	1.26793e-105
Sec22b	2.26959e-68	-0.713258	0.251	0.561	5.29745e-64
Atp2a2	6.58401e-60	-1.81507	0.28	0.561	1.53677e-55
Zfp106	5.29382e-51	-0.307913	0.28	0.561	1.23563e-46
Gnaq	0.0396498	0.508347	0.474	0.561	1
Ms4a4d	3.8044e-197	-4.05485	0.052	0.56	8.87985e-193
Psip1	6.45685e-62	-0.507401	0.254	0.56	1.50709e-57
Ndufab1	1.44482e-20	-0.313748	0.353	0.56	3.37235e-16
Rock2	1.2397e-07	0.391384	0.417	0.56	0.00289358
Gng11	0	1.89034	0.929	0.559	0
Fam46a	9.70579e-202	-3.69528	0.04	0.559	2.26543e-197
Smoc2	4.58545e-177	-4.64726	0.099	0.559	1.07029e-172
Ctsh	8.36885e-134	-3.17575	0.178	0.559	1.95337e-129
Papola	8.36975e-05	0.490927	0.444	0.559	1
Atrx	0.0912022	0.497148	0.481	0.559	1
Nfix	8.26054e-149	-2.10001	0.117	0.557	1.92809e-144
Sf3b5	1.32564e-55	-0.348256	0.248	0.557	3.09417e-51
Eid1	1.73101e-64	-0.594044	0.244	0.556	4.04035e-60
Grina	9.67993e-62	-0.589817	0.244	0.556	2.25939e-57
Fermt2	2.19072e-43	1.01449	0.675	0.556	5.11335e-39
Foxn3	8.51726e-06	0.332667	0.43	0.556	0.198801
Strn3	0.0329908	0.465989	0.466	0.556	1
Pld3	1.30252e-81	-0.892103	0.227	0.555	3.04021e-77
Erp29	5.60072e-40	-0.283202	0.305	0.555	1.30727e-35
2810474O19Rik	6.20196e-40	-0.326884	0.309	0.555	1.4476e-35
Sbds	0.313023	0.576418	0.494	0.555	1
Anapc13	1.79739e-56	-0.492132	0.244	0.554	4.19529e-52
Tubb4b	4.86169e-43	1.02729	0.649	0.554	1.13477e-38
Hadhb	5.13302e-26	-0.336398	0.347	0.553	1.1981e-21
Tax1bp3	1.01948e-12	0.681427	0.556	0.553	2.37957e-08
Oaz2	8.37503e-15	0.893374	0.545	0.552	1.95482e-10
Psmc1	0.957818	0.557046	0.493	0.552	1
Sfrp1	3.82031e-194	-3.99821	0.048	0.551	8.91698e-190
Twsg1	4.52019e-155	-1.65699	0.087	0.551	1.05506e-150
Golt1b	1.51699e-80	-0.792611	0.222	0.551	3.54081e-76
Derl1	5.21924e-47	-0.277415	0.28	0.551	1.21822e-42
Rbm42	1.2614e-08	0.276639	0.392	0.551	0.000294423
Fbln2	3.60403e-09	-0.31446	0.462	0.55	8.41217e-05
Tubb6	4.34672e-109	-1.6999	0.195	0.549	1.01457e-104
Gna11	6.58582e-26	0.975081	0.62	0.549	1.5372e-21
Ube2v1	0.0605084	0.403768	0.428	0.549	1
Qpct	3.62785e-192	-3.89417	0.048	0.548	8.46776e-188
Mesdc2	5.91494e-76	-0.716637	0.223	0.548	1.38061e-71
Ythdf2	7.59646e-18	0.275733	0.364	0.548	1.77309e-13
Oxct1	8.54152e-83	-1.04628	0.217	0.547	1.99368e-78
Skiv2l2	0.84257	0.345619	0.51	0.547	1
Fgl2	1.88473e-184	-3.34663	0.057	0.546	4.39915e-180
Tubb2a	9.36944e-08	0.569942	0.552	0.546	0.00218692
Hnrnph1	0.000729341	0.472634	0.446	0.546	1
Nr2f2	6.83282e-120	-1.40592	0.133	0.545	1.59485e-115
Golim4	5.2614e-75	-0.683952	0.218	0.545	1.22806e-70
Mxra7	6.93179e-42	-0.408968	0.3	0.545	1.61795e-37
Snrnp27	1.4481e-20	0.289403	0.338	0.545	3.38002e-16
Vamp8	0.00737074	0.267834	0.438	0.545	1
Rap1a	0.371642	0.504877	0.477	0.545	1
Psmb10	0.000602124	0.699017	0.489	0.544	1
Chmp5	0.0141851	0.716421	0.499	0.544	1
Cxcl12	1.59748e-231	1.78108	0.885	0.543	3.72868e-227
6330406I15Rik	1.12575e-194	-4.61595	0.038	0.543	2.62761e-190
Kars	4.48202e-06	0.315971	0.415	0.542	0.104615
Stat3	8.11837e-05	0.348903	0.439	0.542	1
G0s2	8.40048e-189	-3.62869	0.045	0.541	1.96076e-184
Cxcl16	1.5854e-85	-1.12491	0.206	0.541	3.70047e-81
Lgals9	1.33791e-56	1.28009	0.669	0.541	3.12282e-52
Eprs	2.18248e-45	-0.254345	0.274	0.541	5.09413e-41
Slc3a2	9.54123e-05	0.308826	0.433	0.541	1
Mier1	0.299111	0.514243	0.459	0.541	1
Vdac1	2.74968e-54	-0.454718	0.256	0.54	6.41802e-50
Prdx6	1.2684e-45	-0.509585	0.286	0.54	2.96057e-41
Zfand5	8.63476e-06	0.483838	0.415	0.54	0.201544
Uap1	3.88804e-51	-0.808452	0.293	0.539	9.07508e-47
Vcam1	2.57793e-142	-1.69784	0.11	0.538	6.01715e-138
Ttc3	4.03314e-53	-0.30756	0.256	0.538	9.41375e-49
Ccnd3	8.6651e-06	0.784571	0.503	0.538	0.202252
Sra1	6.1724e-56	-0.43157	0.247	0.537	1.4407e-51
Slc50a1	0.734108	0.49596	0.455	0.537	1
Reep3	8.0595e-21	1.12857	0.612	0.535	1.88117e-16
Osbpl9	2.25403e-06	0.449645	0.397	0.535	0.0526114
Ddx6	1.92792e-05	0.266345	0.423	0.535	0.449996
Lpar1	2.10874e-177	-4.00206	0.061	0.534	4.922e-173
Socs2	3.26047e-30	-0.283847	0.322	0.534	7.61026e-26
Cwc15	1.00356e-07	0.429454	0.377	0.534	0.00234241
Ndel1	3.29159e-21	1.08272	0.598	0.533	7.6829e-17
Hes1	0.262669	0.40498	0.524	0.533	1
Bzw1	3.80111e-05	0.474248	0.401	0.532	0.887218
Mmp23	8.01035e-186	-4.56997	0.044	0.531	1.8697e-181
Adamts2	2.01729e-182	-3.19942	0.044	0.531	4.70856e-178
Zfyve21	7.46221e-124	-1.47332	0.122	0.531	1.74175e-119
Cpe	1.68859e-117	-2.05907	0.155	0.531	3.94134e-113
Pi16	1.52119e-75	-2.5442	0.271	0.531	3.55062e-71
Flna	4.85914e-59	-0.679213	0.253	0.531	1.13417e-54
AI597468	1.29655e-58	-0.587199	0.239	0.531	3.02627e-54
Col14a1	1.30594e-190	-3.7258	0.027	0.53	3.04819e-186
Prelp	2.73495e-157	-2.67024	0.091	0.53	6.38364e-153
Vmp1	3.50416e-74	-0.787074	0.217	0.53	8.17906e-70
Rfk	2.0759e-07	0.374004	0.393	0.53	0.00484535
Ssh2	0.0474134	0.820021	0.5	0.53	1
Pcsk6	2.41576e-184	-3.87761	0.037	0.529	5.63863e-180
Pigp	4.38192e-55	-0.383038	0.224	0.529	1.02278e-50
Atp1a1	0.0192264	0.291798	0.452	0.529	1
Tceal8	5.03748e-83	-0.824519	0.178	0.528	1.1758e-78
2610101N10Rik	5.15568e-20	0.39074	0.331	0.528	1.20339e-15
2310036O22Rik	0.0178274	0.383615	0.431	0.527	1
Eif4a3	0.10003	0.46773	0.421	0.527	1
Bcl6	3.91167e-185	-1.83961	0.023	0.526	9.13024e-181
Golph3	7.60851e-54	-0.301583	0.241	0.526	1.7759e-49
Gm6548	2.4085e-16	0.84978	0.333	0.526	5.62169e-12
Pid1	7.08022e-187	-4.63271	0.034	0.525	1.65259e-182
Tmem167	9.9767e-58	-0.650422	0.24	0.525	2.32866e-53
Polr1d	0.019724	0.557497	0.465	0.524	1
Tnxb	6.89897e-181	-4.37255	0.042	0.523	1.61029e-176
Spon1	4.51301e-173	-3.1351	0.052	0.523	1.05338e-168
Ggh	3.97603e-78	-0.804094	0.182	0.523	9.28044e-74
Zfhx3	9.93762e-74	-0.80912	0.21	0.522	2.31954e-69
Fkbp3	0.0900117	0.383233	0.455	0.522	1
Ado	4.38967e-79	-0.794513	0.192	0.521	1.02459e-74
Abi3bp	8.29412e-178	-3.56417	0.041	0.52	1.93593e-173
Arhgef12	2.07174e-06	0.87024	0.54	0.52	0.0483565
F2r	1.09697e-51	-0.732825	0.252	0.519	2.56045e-47
Anxa7	0.000797983	0.335108	0.41	0.519	1
Pcbp2	0.723283	0.74019	0.444	0.519	1
Aebp1	1.31956e-153	-2.95919	0.079	0.518	3.07998e-149
Enpp2	7.03663e-141	-2.55483	0.105	0.518	1.64242e-136
Cr1l	3.39553e-11	0.885262	0.535	0.518	7.92551e-07
Polr2e	0.00392551	0.413734	0.404	0.518	1
Phactr2	0.0366561	0.544943	0.494	0.518	1
Dpysl3	4.83557e-85	-1.02625	0.176	0.517	1.12867e-80
Acaa1a	7.32086e-36	-0.251397	0.28	0.517	1.70876e-31
Ldhb	8.28803e-69	-1.25663	0.225	0.516	1.93451e-64
Zmat2	1.25752e-16	0.339896	0.342	0.516	2.93519e-12
Csnk2b	0.00341515	0.350282	0.399	0.516	1
Fam114a1	2.75488e-101	-1.10487	0.143	0.515	6.43017e-97
Anxa4	6.30886e-49	-0.266758	0.245	0.515	1.47255e-44
Aup1	2.45744e-07	0.29531	0.384	0.515	0.00573592
Higd2a	0.000361791	0.670866	0.49	0.515	1
Rnf167	0.000367847	0.328935	0.399	0.515	1
Tmem14c	0.00481216	0.320274	0.398	0.515	1
Dctn3	0.0348072	0.447039	0.399	0.515	1
2010106G01Rik	0.341696	0.721204	0.462	0.515	1
Gns	6.106e-75	-0.602293	0.195	0.514	1.4252e-70
Ckap4	5.90319e-52	-0.521573	0.24	0.514	1.37786e-47
Nipbl	2.64382e-09	0.323109	0.378	0.514	6.17093e-05
Snx5	2.8242e-65	-0.931249	0.225	0.513	6.59196e-61
2020-03-02	0.159119	0.485011	0.422	0.513	1
Rbm3	2.63917e-08	0.311444	0.345	0.512	0.00061601
Rbm25	8.59544e-07	0.361166	0.394	0.512	0.0200626
Olfml2b	2.19941e-172	-4.35116	0.047	0.511	5.13364e-168
Fam162a	7.58034e-60	-0.685289	0.214	0.511	1.76933e-55
Polr2l	8.09748e-09	0.366737	0.355	0.511	0.000189003
Ppp2r5c	0.300439	0.592199	0.457	0.511	1
0610007N19Rik	6.30542e-184	-3.45783	0.019	0.509	1.47175e-179
Tgfbi	6.99206e-150	-3.52798	0.091	0.509	1.63202e-145
1810058I24Rik	3.61107e-50	-0.455076	0.235	0.509	8.4286e-46
Ifngr2	6.265e-42	-0.282833	0.257	0.509	1.46231e-37
Fam108a	3.39735e-14	0.864233	0.558	0.509	7.92977e-10
Hnrnpa3	4.76336e-12	0.389434	0.344	0.509	1.11182e-07
Ly6a	0	2.45609	0.975	0.508	0
Asph	1.3626e-100	-1.08401	0.144	0.508	3.18045e-96
Pdlim7	3.72973e-53	-0.61225	0.234	0.508	8.70556e-49
Klc1	0.0408841	0.438606	0.421	0.508	1
Ssu72	0.177758	0.581375	0.461	0.508	1
Slc16a2	6.52276e-59	-0.788107	0.231	0.507	1.52248e-54
Cyr61	0.163297	-0.454008	0.487	0.506	1
Lims1	0.0327001	0.285125	0.41	0.505	1
Eln	3.41335e-150	-2.60271	0.067	0.504	7.9671e-146
Picalm	7.73307e-33	1.05315	0.658	0.504	1.80498e-28
Lamb1	2.12446e-20	-0.287902	0.352	0.504	4.95871e-16
Heg1	9.2e-05	0.568191	0.542	0.504	1
Chd9	1.2568e-60	-0.416404	0.206	0.503	2.9335e-56
Yipf5	7.85694e-41	-0.293034	0.256	0.503	1.83389e-36
Glo1	6.89736e-38	-0.254408	0.264	0.503	1.60991e-33
Kras	0.288568	0.527909	0.426	0.503	1
B230219D22Rik	0.506612	0.612429	0.461	0.503	1
Pofut2	1.02927e-76	-0.766203	0.173	0.502	2.40241e-72
Zc3h11a	1.71035e-07	0.311904	0.385	0.502	0.00399213
Rab5c	0.186583	0.607945	0.444	0.502	1
Tgfbr3	5.60046e-84	-0.791471	0.166	0.501	1.3072e-79
Tkt	1.26048e-35	-0.257966	0.273	0.501	2.9421e-31
Spag9	0.00644711	1.10335	0.483	0.501	1
Ikbip	3.35512e-110	-1.2057	0.116	0.5	7.83118e-106
Tmem123	2.31767e-16	1.10647	0.541	0.5	5.40968e-12
Ythdc1	6.25867e-06	0.408651	0.383	0.5	0.146084
Hadha	1.72585e-36	-0.268402	0.265	0.499	4.02831e-32
Capza1	1.12754e-05	0.346669	0.384	0.499	0.263178
Ptgis	4.80025e-171	-4.4283	0.036	0.498	1.12043e-166
Ddrgk1	3.58587e-09	0.283895	0.353	0.498	8.36978e-05
Atp6v1e1	2.28163e-07	0.416942	0.363	0.498	0.00532555
Fus	0.217354	0.578515	0.425	0.498	1
Col4a2	8.28345e-181	1.68327	0.828	0.497	1.93344e-176
Nupr1	1.15354e-159	-3.85636	0.058	0.497	2.69248e-155
Cenpb	0.00422752	0.460421	0.401	0.497	1
Fndc3b	1.3602e-100	-1.30533	0.139	0.496	3.17484e-96
Xdh	7.07421e-43	1.25279	0.646	0.496	1.65119e-38
Hprt	0.109371	0.394903	0.41	0.496	1
Heyl	1.69606e-162	-3.89238	0.046	0.495	3.95877e-158
Cyth3	4.868e-43	-0.348996	0.25	0.495	1.13624e-38
Pls3	9.57655e-34	1.25868	0.606	0.495	2.23526e-29
Gemin7	0.053376	0.474555	0.389	0.495	1
Cyfip1	0.0885472	0.380083	0.427	0.495	1
Scarb2	7.99831e-73	-0.64496	0.178	0.494	1.86689e-68
Vamp2	6.44924e-67	-0.46082	0.178	0.494	1.50532e-62
Itm2a	3.31464e-101	-1.78323	0.149	0.493	7.7367e-97
Mapk3	3.2022e-23	1.20389	0.576	0.493	7.47426e-19
Mapk1	3.43741e-10	0.271742	0.351	0.493	8.02325e-06
Eif6	1.06579e-06	0.268884	0.363	0.493	0.0248766
Ccdc47	8.36164e-09	0.256293	0.353	0.492	0.000195169
Rbpms	0.0828606	0.416314	0.476	0.492	1
Ndufa10	3.56408e-37	-0.532108	0.258	0.491	8.31892e-33
Sorbs3	9.82144e-30	0.931163	0.616	0.491	2.29242e-25
Srsf10	9.50482e-10	0.297795	0.345	0.491	2.21852e-05
Amotl1	0.000685432	0.276439	0.414	0.491	1
Mrpl30	3.26496e-39	-0.331121	0.247	0.49	7.62074e-35
Fxc1	2.69888e-07	0.473883	0.344	0.49	0.00629947
Hist1h2bc	5.02694e-05	0.718124	0.472	0.49	1
Kazald1	5.91168e-122	-1.99984	0.097	0.489	1.37984e-117
Clptm1l	3.29122e-44	-0.419093	0.24	0.489	7.68204e-40
4930523C07Rik	6.13892e-10	0.768539	0.538	0.489	1.43289e-05
Palm	0.0514777	0.525758	0.472	0.489	1
Arhgef40	2.03262e-111	-1.66452	0.11	0.488	4.74433e-107
Unc50	1.16631e-10	0.320791	0.319	0.488	2.72229e-06
Mfap4	1.31388e-123	-4.78669	0.127	0.487	3.06673e-119
Eif4ebp1	1.34626e-68	-0.660044	0.171	0.487	3.14231e-64
Klf4	2.25125e-32	1.26447	0.607	0.487	5.25463e-28
Mrpl17	0.73558	0.55191	0.419	0.487	1
Arl3	2.29301e-83	-0.810689	0.145	0.486	5.35212e-79
Psmb7	2.83078e-06	0.257856	0.341	0.486	0.0660733
Polr2j	0.000174142	0.341525	0.358	0.486	1
Mtap7d1	0.0186868	0.725613	0.461	0.486	1
Nfe2l1	0.195639	0.653113	0.474	0.486	1
Igsf3	3.02556e-152	-3.45791	0.054	0.485	7.06196e-148
Sypl	8.16572e-52	1.39878	0.611	0.485	1.90596e-47
Lyz2	7.09823e-07	-6.06279	0.418	0.485	0.016568
Tmbim4	0.00105485	0.436012	0.375	0.485	1
Tenc1	0.0642047	0.512309	0.483	0.484	1
Cldn25	1.55685e-44	-0.44743	0.232	0.483	3.63384e-40
Ccdc6	2.616e-60	-0.790243	0.204	0.482	6.106e-56
Foxo1	0.100565	0.509417	0.396	0.482	1
Col5a2	8.96515e-156	-3.75762	0.045	0.481	2.09255e-151
Ctgf	1.44441e-142	-2.85247	0.058	0.481	3.3714e-138
Tomm20	0.0099965	0.452505	0.375	0.481	1
Churc1	1.29152e-46	-0.385806	0.216	0.48	3.01453e-42
Elavl1	8.08005e-08	0.260184	0.348	0.48	0.00188596
Gdi1	1.76651e-06	0.340951	0.362	0.48	0.0412322
Neat1	0.000383703	0.538436	0.38	0.48	1
Spna2	1.67675e-48	1.33098	0.64	0.479	3.91371e-44
Dnajc10	1.08475e-47	-0.438141	0.22	0.479	2.53192e-43
Emd	3.33724e-43	-0.338365	0.219	0.479	7.78946e-39
Sin3b	5.54407e-09	0.273511	0.352	0.479	0.000129404
Med1	0.0283384	0.464123	0.393	0.479	1
Tex264	1.05755e-41	-0.312617	0.227	0.477	2.46843e-37
Gak	5.8832e-09	0.416548	0.333	0.477	0.00013732
Nap1l4	1.89022e-06	0.311712	0.36	0.477	0.0441196
Rab12	2.15007e-05	0.322179	0.378	0.477	0.501848
Sox9	2.69541e-156	-3.86666	0.041	0.476	6.29135e-152
Efemp2	5.57263e-116	-1.7539	0.093	0.476	1.30071e-111
Efhd2	2.86598e-83	-1.64513	0.167	0.476	6.68947e-79
Vapb	8.66753e-17	0.252134	0.307	0.476	2.02309e-12
Vezf1	5.96273e-15	0.263091	0.311	0.476	1.39176e-10
Acvrl1	1.8235e-09	0.916364	0.5	0.476	4.25623e-05
Elovl1	6.02267e-09	0.295862	0.335	0.476	0.000140575
Arap1	1.15625e-120	-2.05094	0.09	0.475	2.6988e-116
Rap2b	2.47528e-71	-0.785409	0.168	0.475	5.77755e-67
Inpp4a	2.05181e-06	0.348481	0.356	0.475	0.0478912
Aldh1a1	4.49262e-151	-3.56926	0.05	0.474	1.04862e-146
Kdelr3	4.71395e-148	-3.506	0.053	0.474	1.10028e-143
Yif1a	3.66369e-47	-0.495653	0.208	0.474	8.55143e-43
Pnrc2	0.000223248	0.394511	0.369	0.474	1
Emilin1	2.63344e-94	-1.36417	0.127	0.473	6.14672e-90
Man2a1	3.39474e-60	-0.494285	0.193	0.473	7.92366e-56
Pdha1	9.41475e-54	-0.545566	0.2	0.473	2.1975e-49
Srsf6	8.10513e-42	-0.415499	0.24	0.473	1.89182e-37
Aff4	2.68397e-33	-0.295014	0.26	0.473	6.26465e-29
Ndufa9	4.93257e-18	-0.250799	0.301	0.473	1.15131e-13
Ctdsp2	3.82915e-17	0.264412	0.304	0.473	8.93762e-13
Rtf1	1.6405e-13	0.3582	0.313	0.473	3.8291e-09
Lipa	0.14752	0.525469	0.396	0.473	1
Kdelc2	7.39286e-87	-1.0507	0.136	0.472	1.72557e-82
Chsy1	7.26712e-82	-0.921679	0.14	0.472	1.69622e-77
Sfpq	0.964299	0.474491	0.448	0.472	1
Hspg2	2.29881e-44	1.13322	0.659	0.471	5.36566e-40
Ppic	8.29235e-09	0.765287	0.498	0.471	0.000193552
4732418C07Rik	1.9299e-05	0.500054	0.357	0.471	0.450459
Pdcd6ip	0.303362	0.636552	0.409	0.471	1
Cltb	2.7586e-50	1.37937	0.595	0.47	6.43886e-46
4833439L19Rik	0.266603	0.588317	0.411	0.47	1
Tmem45a	7.88035e-159	-4.78971	0.031	0.469	1.83935e-154
Idh1	2.54276e-57	-0.480618	0.188	0.469	5.93505e-53
1110001J03Rik	1.1572e-52	-0.578072	0.19	0.469	2.70101e-48
Smarce1	2.01785e-05	0.306793	0.359	0.469	0.470987
Arpc1a	5.79255e-05	0.432537	0.353	0.469	1
Angptl2	1.36896e-146	-3.62693	0.048	0.468	3.1953e-142
Rnd3	2.33283e-143	-3.02442	0.049	0.468	5.44506e-139
1810046J19Rik	4.17478e-50	-0.360032	0.194	0.468	9.74434e-46
Creld2	9.99654e-40	-0.43161	0.231	0.468	2.33329e-35
Ugdh	4.37023e-81	-1.66549	0.167	0.467	1.02006e-76
Idh2	2.03536e-23	-0.287586	0.278	0.467	4.75072e-19
Map4k4	0.00109299	0.635241	0.364	0.467	1
2810407C02Rik	2.11433e-05	0.436506	0.356	0.466	0.493507
Ccdc12	0.245124	0.556959	0.412	0.466	1
Ggnbp2	3.53254e-11	0.279884	0.322	0.465	8.2453e-07
Selplg	1.48232e-08	-3.50538	0.366	0.465	0.000345988
Rala	0.0393128	0.436172	0.37	0.465	1
Akt1	0.105369	0.576542	0.387	0.465	1
Mt2	3.61709e-98	-3.38069	0.153	0.464	8.44266e-94
Dnm2	0.519782	0.677704	0.418	0.464	1
Iah1	1.19306e-71	-0.78003	0.146	0.463	2.78471e-67
Synj2bp	5.75297e-13	0.291867	0.302	0.463	1.3428e-08
Ggcx	2.07549e-93	-1.17253	0.121	0.462	4.8444e-89
Pabpn1	6.53692e-10	0.303339	0.316	0.462	1.52578e-05
Cebpg	4.0586e-05	0.796381	0.476	0.462	0.947319
Tbx20	5.26469e-155	-4.00675	0.026	0.461	1.22883e-150
Adam15	4.84115e-88	1.6374	0.664	0.461	1.12997e-83
Eri3	1.84022e-84	-0.951349	0.128	0.46	4.29526e-80
Plbd2	9.84909e-59	-0.588412	0.182	0.46	2.29888e-54
Pltp	6.23015e-05	0.365636	0.481	0.46	1
Ppp1r12a	0.0341263	0.292911	0.398	0.46	1
2020-09-08	1.25203e-74	-0.697324	0.146	0.459	2.92237e-70
Psmc4	0.00532318	0.422316	0.353	0.459	1
Vwa1	0.560594	0.324937	0.405	0.459	1
Tfg	1.37745e-44	-0.339182	0.206	0.458	3.2151e-40
Lsmd1	6.49691e-14	0.250506	0.282	0.458	1.51644e-09
Pdgfrl	1.73261e-142	-4.6184	0.053	0.457	4.04407e-138
Cpxm1	9.66014e-137	-4.55323	0.063	0.457	2.25477e-132
Plod1	3.68691e-52	1.42177	0.604	0.457	8.60562e-48
Smu1	5.38388e-06	0.321666	0.341	0.457	0.125665
Bax	0.152551	0.829649	0.398	0.457	1
Slfn5	2.97469e-177	1.94643	0.785	0.456	6.94323e-173
Colec12	8.46704e-124	-2.38491	0.071	0.456	1.97629e-119
Nucb2	2.3181e-74	-0.794744	0.145	0.456	5.41068e-70
Ano6	0.765477	0.626104	0.43	0.456	1
Podn	4.01963e-145	-4.06421	0.041	0.455	9.38222e-141
Srpx	5.17883e-134	-4.32086	0.065	0.455	1.20879e-129
Gem	4.87604e-111	-2.68456	0.105	0.455	1.13812e-106
Srsf7	2.92039e-12	0.279884	0.3	0.455	6.81648e-08
Slc48a1	4.47725e-07	0.256672	0.336	0.455	0.0104503
Sulf1	3.60851e-140	-2.92817	0.042	0.454	8.42261e-136
Ppp2r2a	6.10981e-12	0.276801	0.306	0.454	1.42609e-07
Pdcl3	1.71444e-10	0.265329	0.3	0.454	4.00167e-06
Actr1a	0.00656122	0.547091	0.36	0.454	1
Ghr	6.91685e-62	-0.786972	0.175	0.453	1.61446e-57
0910001L09Rik	2.13234e-43	-0.423126	0.195	0.453	4.97709e-39
Thoc7	1.54064e-42	-0.281598	0.211	0.453	3.596e-38
Dynlt3	1.31114e-09	0.339932	0.313	0.453	3.06034e-05
Aph1a	0.00277897	0.444316	0.358	0.453	1
Dctn1	0.0202687	0.540022	0.368	0.453	1
Sdpr	0	2.34582	0.962	0.452	0
Tial1	5.99737e-09	0.26837	0.33	0.452	0.000139985
Strap	8.11316e-07	0.3115	0.331	0.452	0.0189369
Gfpt2	6.25184e-124	-3.5338	0.077	0.451	1.45924e-119
Fam54b	7.4574e-46	-0.370204	0.195	0.451	1.74063e-41
Pdlim1	1.93127e-13	0.971947	0.494	0.451	4.50778e-09
Mxd4	1.20357e-06	0.800504	0.486	0.451	0.0280925
Il10rb	0.00872305	0.616989	0.433	0.451	1
Rbms2	0.0824953	0.46624	0.393	0.451	1
Ppp1r11	0.732355	0.628866	0.383	0.451	1
Ppp1r14a	9.53184e-148	-2.42281	0.025	0.45	2.22483e-143
Rbpj	4.01329e-77	-0.874759	0.135	0.45	9.36742e-73
Rin2	1.05648e-48	-0.712797	0.212	0.45	2.46593e-44
Tmem55b	7.73059e-27	-0.28293	0.253	0.45	1.8044e-22
Tmx1	5.54301e-15	0.375565	0.278	0.45	1.29379e-10
Nsd1	2.98873e-06	0.453121	0.339	0.45	0.06976
Pkn2	0.165559	0.693645	0.385	0.45	1
Blvrb	4.08783e-70	-1.13055	0.15	0.449	9.5414e-66
Mrps16	3.06383e-47	-0.250156	0.181	0.449	7.15128e-43
Mn1	2.42919e-38	-0.832443	0.235	0.449	5.66997e-34
Dnajc19	7.5033e-38	-0.32213	0.215	0.449	1.75135e-33
Fam89b	4.57629e-35	-0.268507	0.222	0.449	1.06815e-30
Eif4b	3.96163e-17	0.267419	0.277	0.449	9.24683e-13
Zmynd11	5.86061e-07	0.40467	0.334	0.449	0.0136793
Ddit4	0.160045	0.411095	0.439	0.449	1
Lasp1	0.843786	0.606554	0.406	0.449	1
Snapin	2.35811e-45	-0.392344	0.196	0.448	5.50407e-41
Cmtm7	6.53343e-62	-1.01159	0.175	0.447	1.52497e-57
Cisd2	7.86148e-43	-0.331349	0.2	0.447	1.83495e-38
Nadk	2.07131e-08	0.336224	0.323	0.447	0.000483464
Sh3bp5	0.0471919	0.611132	0.365	0.447	1
Sgcb	1.07924e-81	-1.19668	0.128	0.446	2.51905e-77
Scamp2	3.02374e-36	-0.315928	0.229	0.446	7.0577e-32
Dkk3	1.50099e-134	-4.34606	0.054	0.445	3.50347e-130
Plxdc2	4.72627e-129	-4.04633	0.064	0.445	1.10316e-124
Pdpn	5.83134e-125	-2.56966	0.07	0.445	1.36109e-120
Sfxn1	3.49199e-75	-1.12989	0.139	0.444	8.15066e-71
Phlda3	2.8969e-58	-0.759324	0.166	0.444	6.76167e-54
Dnajb9	9.4082e-36	-0.251926	0.214	0.444	2.19597e-31
Suclg1	1.67913e-26	-0.290605	0.246	0.444	3.91926e-22
Abcf1	6.9068e-09	0.453371	0.319	0.444	0.000161212
Sbno1	8.81568e-07	0.44256	0.332	0.444	0.0205767
Ralb	0.00342968	0.676968	0.435	0.444	1
G3bp2	0.0146499	0.456359	0.363	0.444	1
Abca9	2.50738e-137	-3.79309	0.044	0.443	5.85247e-133
Bmyc	1.08819e-67	-0.835008	0.143	0.443	2.53994e-63
Pbxip1	8.89782e-46	-0.59994	0.203	0.443	2.07684e-41
Carkd	1.73085e-44	-0.550856	0.201	0.443	4.03999e-40
Tob2	1.76463e-37	-0.276901	0.21	0.443	4.11883e-33
Tsg101	1.31398e-08	0.270179	0.305	0.443	0.000306696
Taf10	0.0227084	0.40154	0.353	0.442	1
Dag1	5.76266e-29	-0.421254	0.247	0.441	1.34506e-24
Sec24d	8.20676e-88	-1.14811	0.109	0.44	1.91554e-83
Dtnbp1	5.47273e-64	-0.863171	0.155	0.44	1.27739e-59
Acp1	1.43992e-49	-0.4126	0.177	0.44	3.36093e-45
Hibadh	1.79241e-45	-0.423497	0.195	0.44	4.18366e-41
Rpl34	1.18105e-29	-0.279879	0.234	0.44	2.75668e-25
Naalad2	4.35217e-134	-2.94247	0.04	0.439	1.01584e-129
C3	3.61102e-106	-5.30218	0.108	0.439	8.42849e-102
Krcc1	1.72195e-09	0.42196	0.308	0.439	4.01919e-05
Tmpo	0.00156258	0.4894	0.352	0.439	1
Adamts1	0.00397656	0.650766	0.448	0.439	1
Kif1b	0.64438	0.58108	0.419	0.439	1
Ablim1	7.0515e-68	1.34522	0.664	0.438	1.64589e-63
Pja1	5.49649e-59	-0.707103	0.165	0.438	1.28294e-54
Adap2	5.1448e-128	-3.54569	0.056	0.437	1.20085e-123
Adamts5	1.97066e-105	-2.25971	0.088	0.437	4.59972e-101
Phf17	3.61183e-79	-1.21151	0.124	0.437	8.43037e-75
Klhl24	4.45842e-11	1.00529	0.499	0.437	1.04064e-06
Clec2d	6.02117e-11	0.884596	0.489	0.437	1.4054e-06
Top2b	1.04569e-07	0.284696	0.326	0.437	0.00244074
Mef2c	3.36724e-07	0.694768	0.492	0.437	0.00785948
Cript	0.00147711	0.52182	0.335	0.437	1
Chpf	1.01401e-139	-3.86785	0.034	0.436	2.36681e-135
Acot2	9.8292e-68	-0.866708	0.143	0.436	2.29423e-63
1110008F13Rik	1.98068e-34	-0.379437	0.211	0.436	4.62311e-30
Epas1	1.59823e-244	2.0447	0.862	0.435	3.73042e-240
Hsd17b10	7.41165e-51	-0.603017	0.179	0.435	1.72995e-46
Spg21	1.1988e-49	-0.550119	0.178	0.435	2.79813e-45
Tsc22d4	2.01537e-36	-0.357628	0.208	0.435	4.70407e-32
Atg3	5.0141e-32	-0.300105	0.226	0.435	1.17034e-27
Gusb	4.90096e-31	-0.338014	0.229	0.435	1.14393e-26
5730437N04Rik	6.04345e-51	-0.552492	0.168	0.434	1.4106e-46
Dnajc1	7.4662e-41	-0.458342	0.199	0.434	1.74268e-36
2900053A13Rik	7.18766e-14	0.421424	0.267	0.434	1.67767e-09
H2-Ab1	3.02766e-09	-4.85923	0.333	0.434	7.06685e-05
Ehd1	4.58669e-80	1.50404	0.652	0.433	1.07058e-75
Csrp2	9.04e-80	-1.59702	0.128	0.433	2.11003e-75
Gab2	2.26008e-68	-0.74533	0.143	0.433	5.27526e-64
Abhd12	9.12586e-49	-1.16119	0.209	0.433	2.13007e-44
Impact	2.17695e-45	-0.307508	0.183	0.433	5.08123e-41
Slc25a11	9.7366e-37	-0.44278	0.206	0.433	2.27262e-32
Sik1	4.4388e-14	0.812354	0.499	0.433	1.03606e-09
Snrnp70	4.08152e-09	0.389608	0.302	0.433	9.52668e-05
Spr	0.000137432	0.364295	0.317	0.433	1
Ddx1	5.1138e-49	-0.507145	0.182	0.432	1.19361e-44
Tns1	1.4969e-32	1.07393	0.583	0.432	3.49391e-28
Trappc4	8.67804e-09	0.257077	0.3	0.432	0.000202554
Nrbp1	0.333953	0.625732	0.365	0.432	1
Snrk	1.31952e-233	2.04234	0.824	0.431	3.0799e-229
Leprel2	6.47233e-132	-2.97356	0.037	0.431	1.51071e-127
Dynlt1f	1.2366e-63	-0.917227	0.143	0.431	2.88635e-59
Rlim	6.2996e-11	0.312953	0.299	0.431	1.47039e-06
Cnih4	1.66042e-08	0.304229	0.293	0.431	0.000387559
Prrc1	1.22523e-65	-0.896361	0.146	0.43	2.85982e-61
Ifnar1	2.82962e-07	0.287943	0.33	0.43	0.00660462
Gpc6	3.09951e-140	-3.51418	0.023	0.429	7.23456e-136
Prss23	2.24972e-97	-2.10418	0.104	0.429	5.25107e-93
Gcap14	0.527345	0.597536	0.379	0.429	1
Steap3	7.0938e-132	-3.09107	0.036	0.428	1.65576e-127
Col6a3	1.86328e-131	-4.03367	0.042	0.428	4.34907e-127
Trp53	4.89682e-08	0.251069	0.302	0.428	0.00114297
Pak2	0.547158	0.58293	0.377	0.428	1
Hmgcs2	2.52568e-118	-3.98456	0.068	0.427	5.89519e-114
Htatsf1	1.91147e-48	-0.265648	0.169	0.427	4.46156e-44
Cd74	4.63151e-14	-5.22897	0.304	0.427	1.08104e-09
Rpl7l1	1.10978e-10	0.281977	0.281	0.427	2.59035e-06
Mob1a	1.70633e-09	0.320032	0.295	0.427	3.98273e-05
Secisbp2l	0.03583	0.445031	0.361	0.427	1
Dse	7.90282e-141	-3.62926	0.02	0.426	1.8446e-136
Plekhj1	3.73603e-54	-0.481726	0.157	0.426	8.72026e-50
Vamp3	4.00998e-45	1.37904	0.569	0.426	9.35969e-41
Luzp1	1.35448e-38	1.26032	0.556	0.426	3.16149e-34
Fundc2	9.8975e-38	-0.373748	0.198	0.426	2.31018e-33
Tap2	6.46867e-16	1.0349	0.486	0.426	1.50985e-11
Rbm5	1.2504e-10	0.27609	0.299	0.426	2.91856e-06
Coro1c	0.000688391	0.432268	0.332	0.426	1
C1qtnf7	1.73923e-135	-3.27002	0.032	0.425	4.05954e-131
Ndufa4l2	3.43116e-125	-2.78766	0.042	0.425	8.00867e-121
Pdlim3	1.3665e-111	-2.63463	0.07	0.425	3.18955e-107
Snrpd1	6.84112e-32	-0.291868	0.21	0.425	1.59679e-27
Prpf8	3.20039e-15	0.322428	0.274	0.425	7.47002e-11
Unc93b1	8.72151e-12	-0.899972	0.325	0.425	2.03569e-07
Gata4	1.34395e-133	-2.8064	0.026	0.424	3.13692e-129
Maob	4.9124e-129	-2.95943	0.041	0.424	1.1466e-124
Ltbp3	3.52537e-125	-2.52743	0.042	0.424	8.22856e-121
2500003M10Rik	8.18248e-09	0.305618	0.3	0.424	0.000190987
Qdpr	0.572968	0.671764	0.386	0.424	1
Myl9	1.82076e-113	-3.03762	0.067	0.423	4.24983e-109
Csf1	1.14659e-63	-0.295843	0.133	0.423	2.67626e-59
Tmem43	6.06227e-60	-0.690221	0.15	0.423	1.41499e-55
Eif1ax	2.95482e-57	-0.705181	0.153	0.423	6.89686e-53
2410006H16Rik	4.34762e-56	-0.708737	0.148	0.423	1.01478e-51
Sars	8.9813e-11	0.331715	0.283	0.423	2.09632e-06
Dync1h1	0.031265	0.527765	0.366	0.423	1
Tm7sf3	2.90388e-74	-0.901101	0.118	0.422	6.77796e-70
Lima1	9.67925e-09	0.259697	0.3	0.422	0.000225923
Sf3b4	7.35144e-06	0.286859	0.302	0.422	0.17159
C1qb	8.49803e-06	-5.60133	0.357	0.422	0.198353
Thoc2	3.40419e-05	0.485648	0.324	0.422	0.794571
Tmed5	0.000126215	0.828494	0.429	0.422	1
Fam198b	0.34149	0.559276	0.4	0.422	1
Mgat1	0.539652	0.730684	0.358	0.422	1
Mfap2	3.37595e-105	-2.09416	0.074	0.421	7.87982e-101
Svil	1.75402e-47	-0.448115	0.173	0.421	4.09405e-43
Cdc5l	9.70858e-10	0.325549	0.283	0.421	2.26608e-05
Fam174a	1.40885e-07	0.309943	0.289	0.421	0.0032884
Sugt1	0.00224239	0.449421	0.333	0.421	1
Pcmtd1	0.847515	0.695743	0.374	0.421	1
Cd55	2.97653e-96	-1.86101	0.089	0.42	6.94752e-92
Igfbp6	3.86401e-93	-3.43481	0.116	0.42	9.01898e-89
Anapc2	3.15609e-05	0.504064	0.314	0.42	0.736664
Mysm1	0.00387779	0.619777	0.331	0.42	1
Acsl5	0.0773055	0.521624	0.367	0.42	1
Naaa	1.51107e-110	-2.35952	0.064	0.419	3.52698e-106
Smtn	2.10012e-10	0.884181	0.467	0.419	4.90188e-06
Dnajb1	0.00206306	0.404344	0.341	0.419	1
Cd97	0.00992133	0.379286	0.446	0.419	1
2810403A07Rik	0.0208357	0.54009	0.341	0.419	1
Klf3	0.0825429	0.661934	0.415	0.419	1
Ndn	7.02496e-114	-2.81202	0.064	0.418	1.6397e-109
Igsf8	1.2132e-101	-1.45716	0.071	0.418	2.83173e-97
Rnft1	2.52643e-64	-0.613181	0.131	0.418	5.89695e-60
Flot2	6.00201e-60	-0.69289	0.147	0.418	1.40093e-55
Gpr108	2.11226e-49	-0.623574	0.174	0.418	4.93023e-45
Tceb3	3.54185e-14	0.342203	0.272	0.418	8.26704e-10
Stk25	9.69794e-05	0.300859	0.332	0.418	1
Ptp4a1	7.71163e-56	-0.551533	0.149	0.417	1.79997e-51
Sidt2	3.23701e-47	-0.630305	0.178	0.417	7.55551e-43
Pik3r1	3.61045e-42	-0.527653	0.189	0.417	8.42715e-38
Hsd17b4	3.06922e-40	-0.332087	0.182	0.416	7.16388e-36
Rsl24d1	4.21392e-39	-0.299056	0.192	0.416	9.83572e-35
Fcf1	6.91694e-13	0.298015	0.259	0.416	1.61448e-08
0610012G03Rik	0.0160822	0.352858	0.333	0.416	1
D14Abb1e	0.0161671	0.599456	0.347	0.416	1
Fbxw2	0.718369	0.590194	0.37	0.416	1
S100a1	7.22365e-20	0.658401	0.513	0.415	1.68607e-15
Rab5a	9.36683e-10	0.408028	0.277	0.415	2.18631e-05
Dcaf7	5.34392e-08	0.356672	0.291	0.415	0.00124732
Pum1	2.99124e-07	0.42731	0.302	0.415	0.00698185
Nsmce4a	7.09601e-06	0.301185	0.301	0.415	0.165628
Cdc42se1	1.98119e-34	-0.263151	0.198	0.414	4.62429e-30
Ctss	1.86143e-14	-5.06244	0.297	0.414	4.34476e-10
Brd9	1.02293e-09	0.473269	0.287	0.414	2.38762e-05
0610010K14Rik	0.0181812	0.343385	0.333	0.414	1
Commd8	1.58034e-40	-0.457524	0.18	0.413	3.68867e-36
Scamp4	1.55954e-36	-0.301218	0.196	0.413	3.64011e-32
Klhdc2	1.25319e-55	-0.660785	0.148	0.412	2.92508e-51
Cyp20a1	3.22619e-55	-0.635812	0.145	0.412	7.53024e-51
Zmiz1	0.637555	0.776234	0.391	0.412	1
Anxa3	7.26692e-81	1.3784	0.636	0.411	1.69617e-76
Ctsf	2.38299e-80	-1.37095	0.108	0.411	5.56213e-76
Mbtps1	8.70709e-52	-0.650783	0.157	0.411	2.03232e-47
Hdgfrp3	3.31191e-35	-0.259037	0.2	0.411	7.73033e-31
Ssna1	0.000564122	0.493816	0.307	0.411	1
Crk	0.0172723	0.965793	0.409	0.411	1
Tnfaip1	6.63334e-143	1.77171	0.715	0.41	1.54829e-138
Thbd	1.67716e-134	1.70644	0.715	0.41	3.91465e-130
Tmem159	3.24921e-47	-0.533041	0.165	0.41	7.58399e-43
Oxr1	1.95751e-08	0.326728	0.293	0.41	0.000456902
Ubn2	3.61608e-07	0.478224	0.305	0.41	0.00844028
Plp2	0.000106102	0.319354	0.308	0.41	1
Myef2	0.000674682	0.32044	0.324	0.41	1
Creb3	0.014117	0.375772	0.328	0.41	1
Pdcd10	0.0354493	0.517516	0.334	0.41	1
Zfp260	2.57153e-48	-0.349635	0.161	0.409	6.00222e-44
Prrc2b	6.33746e-06	0.507547	0.308	0.409	0.147923
Gba	4.41537e-43	-0.529653	0.176	0.408	1.03059e-38
Mbd3	4.66573e-31	-0.257529	0.208	0.408	1.08903e-26
Xiap	2.34178e-19	0.979936	0.523	0.408	5.46595e-15
Mtmr2	8.62781e-07	1.04429	0.451	0.408	0.0201382
Itgav	2.65697e-90	-1.09979	0.08	0.407	6.20163e-86
Phyh	3.74988e-68	-1.31703	0.13	0.407	8.7526e-64
Slc44a1	7.21279e-64	-1.03665	0.133	0.407	1.68354e-59
Mrps28	6.2854e-43	-0.426483	0.166	0.407	1.46708e-38
4933439F18Rik	1.35074e-33	-0.25059	0.195	0.407	3.15276e-29
Acadm	4.46406e-33	-0.489544	0.203	0.407	1.04196e-28
Kcnq1ot1	6.20201e-09	0.332217	0.292	0.407	0.000144761
Irf2	0.00010909	0.444182	0.312	0.407	1
Arhgef1	0.0117166	0.970846	0.403	0.407	1
Dusp11	0.0509786	0.533668	0.345	0.407	1
Stx4a	3.74131e-34	-0.287601	0.196	0.406	8.7326e-30
Man2b1	2.15147e-33	-1.05026	0.216	0.406	5.02174e-29
Arid5b	6.3224e-26	0.967655	0.534	0.406	1.47571e-21
Rod1	1.35311e-22	1.25559	0.523	0.406	3.15829e-18
D0H4S114	1.97733e-16	0.920722	0.5	0.406	4.61528e-12
Zcrb1	1.13554e-09	0.319552	0.276	0.406	2.65046e-05
Cops8	1.9942e-07	0.268468	0.297	0.406	0.00465467
Arid1a	4.59695e-06	0.397212	0.315	0.406	0.107297
Becn1	3.18385e-05	0.445977	0.295	0.406	0.743143
Cmtm6	0.371591	0.622025	0.351	0.406	1
Cyp27a1	9.45278e-122	-3.31642	0.037	0.405	2.20637e-117
Cdc42ep1	2.25508e-92	1.48759	0.641	0.405	5.26359e-88
Slc35b2	1.21553e-68	-1.19861	0.127	0.405	2.83717e-64
Exoc3	1.98651e-38	-0.327187	0.185	0.405	4.63672e-34
Osgep	5.0222e-35	-0.289718	0.185	0.405	1.17223e-30
Bcl2l1	1.45127e-31	1.0856	0.53	0.405	3.38742e-27
Stk24	1.09873e-42	-0.369232	0.17	0.404	2.56454e-38
Laptm5	8.86124e-20	-4.89601	0.267	0.404	2.0683e-15
Ktn1	4.27862e-12	0.939152	0.49	0.404	9.98674e-08
Rbck1	0.0107274	0.759187	0.394	0.404	1
Ncoa1	7.67497e-73	-1.09149	0.11	0.403	1.79142e-68
Fndc3a	3.55383e-52	-0.587718	0.152	0.403	8.29499e-48
Dlc1	3.84829e-40	0.983497	0.595	0.403	8.98228e-36
Cdc123	3.45197e-35	-0.332799	0.185	0.403	8.05725e-31
Nek7	7.38615e-15	0.271467	0.256	0.403	1.724e-10
Cxcr7	9.82586e-14	0.639546	0.492	0.403	2.29346e-09
Stx12	3.05849e-08	1.02819	0.431	0.403	0.000713883
Prpf4b	0.988901	0.622705	0.374	0.403	1
Sesn1	5.00158e-56	-0.840826	0.145	0.402	1.16742e-51
Gpx7	4.98251e-51	-0.693541	0.15	0.402	1.16297e-46
Hfe	1.29524e-25	-0.25727	0.213	0.402	3.02321e-21
Prpf6	4.28604e-18	0.293253	0.237	0.402	1.0004e-13
Pisd-ps3	4.56493e-13	0.342536	0.274	0.402	1.0655e-08
Ypel5	0.00135584	0.598202	0.31	0.402	1
Ssbp2	5.15722e-119	-3.27132	0.038	0.401	1.20375e-114
Nbl1	3.15785e-96	-2.71424	0.085	0.401	7.37074e-92
Cnot8	4.09152e-09	0.275576	0.277	0.401	9.55002e-05
Polr2c	0.000380089	0.388649	0.294	0.401	1
Chpt1	4.05424e-72	-0.926507	0.11	0.4	9.463e-68
Atp6v1d	6.39651e-12	0.27437	0.263	0.4	1.49301e-07
Zmynd8	2.46988e-09	0.371946	0.281	0.4	5.76494e-05
Tor1aip2	5.36965e-08	0.364277	0.285	0.4	0.00125333
Furin	5.59737e-06	0.441812	0.297	0.4	0.130648
Wasl	0.0637951	0.584173	0.325	0.399	1
Srsf1	1.44885e-10	0.293365	0.27	0.398	3.38176e-06
Bud31	0.0147163	0.48289	0.312	0.398	1
Nudt4	0.118072	0.528732	0.39	0.398	1
Purb	0.403434	0.905126	0.38	0.398	1
Dapk1	9.48513e-127	-3.36903	0.021	0.397	2.21393e-122
Col5a1	3.37438e-126	-3.73646	0.024	0.397	7.87614e-122
Sec14l1	2.3089e-43	1.10927	0.589	0.397	5.38919e-39
B230120H23Rik	4.10004e-37	-0.612554	0.181	0.397	9.5699e-33
Tcf7l1	2.48354e-36	-0.309557	0.177	0.397	5.79683e-32
Dram2	1.5156e-15	1.05228	0.463	0.397	3.53755e-11
Gata6	8.84761e-94	-1.66181	0.067	0.396	2.06512e-89
Akt2	4.92664e-89	-1.53935	0.08	0.396	1.14993e-84
Acadsb	2.387e-59	-0.871441	0.133	0.396	5.5715e-55
Flii	3.91553e-06	0.299016	0.296	0.396	0.0913923
Carhsp1	0.00268998	0.573176	0.311	0.396	1
2020-09-10	0.0386354	0.666082	0.331	0.396	1
Pum2	0.306877	0.646701	0.356	0.396	1
Pdgfrb	1.96576e-121	-3.80517	0.028	0.395	4.58827e-117
Phlda1	4.24099e-114	-1.97269	0.037	0.395	9.8989e-110
Aldh7a1	1.11849e-76	-1.48131	0.099	0.395	2.61066e-72
Ccng2	6.54125e-40	-0.420925	0.17	0.395	1.52679e-35
Srpk2	2.23423e-30	-0.256864	0.197	0.395	5.21492e-26
Zhx1	1.04992e-18	0.325297	0.233	0.395	2.45063e-14
Lats2	2.23265e-18	1.13029	0.484	0.395	5.21123e-14
Nudcd3	3.78408e-07	0.518358	0.286	0.395	0.00883242
Snx9	4.57646e-16	0.319668	0.231	0.394	1.06819e-11
Eapp	3.94489e-12	0.280346	0.255	0.394	9.20778e-08
Mob4	5.60255e-06	0.53485	0.286	0.394	0.130769
Ctcf	4.1066e-05	0.433187	0.303	0.394	0.958521
Upf1	5.31711e-05	0.459006	0.297	0.394	1
Ppfibp1	0.208693	0.656886	0.371	0.394	1
Stt3b	1.04782e-53	-0.676369	0.14	0.393	2.44571e-49
Ifi35	0.0686849	0.790396	0.371	0.393	1
Lta4h	0.540819	0.672754	0.342	0.393	1
Gucy1a3	3.94217e-115	-3.73455	0.038	0.392	9.20143e-111
Rasa3	6.86036e-95	-1.61481	0.064	0.392	1.60128e-90
Glt8d1	2.38295e-66	-0.964002	0.116	0.392	5.56205e-62
Wdr26	2.20525e-09	0.434403	0.278	0.392	5.14728e-05
Jag1	6.19959e-08	0.424885	0.29	0.392	0.00144705
Mknk2	5.47505e-05	0.268385	0.306	0.392	1
Cotl1	2.46515e-85	-2.37301	0.091	0.391	5.75389e-81
Chst12	1.51452e-84	-1.5195	0.082	0.391	3.53503e-80
P2rx4	7.66529e-83	-1.32088	0.085	0.391	1.78916e-78
Tmem176a	4.10172e-67	-2.02764	0.131	0.391	9.57383e-63
Bckdk	1.29927e-43	-0.388918	0.158	0.391	3.03262e-39
Cdc16	1.12782e-39	-0.409667	0.167	0.391	2.63245e-35
Sntb2	5.31909e-35	-0.354272	0.179	0.391	1.24153e-30
Cdc42ep3	1.87104e-28	0.782918	0.527	0.391	4.36719e-24
Midn	6.21394e-14	0.830893	0.467	0.391	1.4504e-09
Gls	4.37306e-08	0.342338	0.284	0.391	0.00102072
Gtf2i	0.103333	0.791793	0.342	0.391	1
Thbs2	3.56433e-112	-3.88664	0.044	0.39	8.3195e-108
Sepn1	2.20334e-53	-0.466158	0.132	0.39	5.14282e-49
Derl2	5.24971e-42	-0.584775	0.167	0.39	1.22534e-37
Mrpl13	1.27003e-36	-0.371685	0.171	0.39	2.96437e-32
Mga	1.85007e-16	0.265481	0.24	0.39	4.31825e-12
Akap9	1.35502e-13	0.25199	0.248	0.39	3.16275e-09
Elf1	0.000733263	0.897794	0.415	0.39	1
Iqsec1	0.637955	0.455619	0.363	0.39	1
Sh3d19	3.14195e-83	-1.37266	0.082	0.389	7.33363e-79
Vma21	1.03258e-42	-0.539057	0.16	0.389	2.41015e-38
Sp100	2.74445e-41	1.17968	0.552	0.389	6.40583e-37
AI837181	2.26763e-39	-0.461943	0.168	0.389	5.29286e-35
C1qbp	4.83708e-32	-0.387459	0.184	0.389	1.12902e-27
Myo1c	3.21796e-29	1.18266	0.528	0.389	7.51103e-25
Scoc	5.03978e-07	0.460211	0.269	0.389	0.0117633
Mrps18c	7.61413e-05	0.529953	0.283	0.389	1
Dennd5a	0.0242859	0.531445	0.331	0.389	1
Syt11	6.88155e-93	-2.33919	0.073	0.388	1.60622e-88
Prdx3	6.55531e-36	-0.52896	0.18	0.388	1.53007e-31
Cxx1c	2.11723e-34	-0.489869	0.189	0.388	4.94182e-30
Erbb2ip	5.83186e-08	0.524842	0.269	0.388	0.00136121
Dbnl	0.00064353	0.440916	0.299	0.388	1
Trps1	4.57974e-93	-1.24749	0.064	0.387	1.06896e-88
Fubp3	2.80788e-14	0.376637	0.233	0.387	6.55388e-10
Prrx1	2.51401e-125	-3.32454	0.015	0.386	5.86795e-121
Eps8	5.23022e-59	-1.19381	0.127	0.386	1.22079e-54
Praf2	8.51726e-41	-0.497735	0.159	0.386	1.98801e-36
Scfd1	8.87518e-37	-0.289493	0.173	0.386	2.07156e-32
Ubqln1	5.43259e-10	0.341123	0.265	0.386	1.26802e-05
Cttn	4.87174e-09	0.29313	0.274	0.386	0.000113711
Smad7	0.0139989	0.300664	0.33	0.386	1
Sgk1	0	2.76496	0.844	0.385	0
Tmem204	2.33073e-215	1.78882	0.784	0.385	5.44016e-211
Tgfb3	7.84772e-98	-1.99704	0.055	0.385	1.83174e-93
Trpm7	2.10774e-19	-0.276165	0.233	0.385	4.91967e-15
Fcho2	1.34343e-10	1.11042	0.438	0.385	3.13569e-06
Smg1	8.65414e-10	0.620027	0.268	0.385	2.01996e-05
Fam176b	0.0553984	0.542488	0.377	0.385	1
Pla2g4a	8.99481e-120	-3.61086	0.025	0.384	2.09948e-115
Plxnb2	2.32617e-108	-2.83722	0.041	0.384	5.42952e-104
Clpp	1.601e-30	-0.363605	0.184	0.384	3.73689e-26
Ip6k1	2.19848e-05	0.384574	0.291	0.384	0.513148
Chmp2b	0.0570047	0.526718	0.325	0.384	1
Ngfrap1	1.75904e-66	-1.0177	0.104	0.383	4.10578e-62
Zfp36l2	2.05646e-33	-0.643935	0.189	0.383	4.79998e-29
Sgpp1	2.13697e-78	-1.48307	0.084	0.382	4.9879e-74
2810453I06Rik	1.15072e-51	-0.393154	0.127	0.382	2.68591e-47
Tnks2	0.0262996	0.494833	0.324	0.382	1
Ace	4.54676e-65	-1.47009	0.117	0.381	1.06126e-60
Lbh	6.92336e-60	-0.971024	0.119	0.381	1.61598e-55
Phpt1	9.73e-52	-0.780573	0.13	0.381	2.27108e-47
Ubl7	7.31601e-31	-0.293847	0.183	0.381	1.70763e-26
Pnkd	9.59946e-14	1.52577	0.43	0.381	2.24061e-09
Trip12	9.02082e-08	0.568576	0.268	0.381	0.00210555
Hist1h1c	0.0378268	0.352116	0.32	0.381	1
Csnk1e	0.220308	0.448195	0.336	0.381	1
Hmgb2	0.348582	0.446195	0.336	0.381	1
Leprel4	2.7513e-82	-1.54178	0.079	0.38	6.42181e-78
Map3k1	9.91657e-47	1.28108	0.556	0.38	2.31463e-42
Txndc12	2.48409e-05	0.28894	0.283	0.38	0.579811
5430437P03Rik	3.8044e-05	0.31367	0.28	0.38	0.887986
Ssbp4	0.000106041	0.323812	0.283	0.38	1
Vps4b	0.00149997	0.573244	0.303	0.38	1
Wbp4	0.00306473	0.601467	0.298	0.38	1
Olfml1	1.0894e-117	-3.82173	0.025	0.379	2.54276e-113
Notch1	5.68055e-106	1.48155	0.665	0.379	1.3259e-101
Kdm5a	1.20063e-09	0.386731	0.263	0.379	2.8024e-05
Mll3	1.27707e-08	0.482886	0.264	0.379	0.000298081
Kpna4	2.64045e-08	0.349818	0.272	0.379	0.000616307
Ncaph2	6.88811e-07	0.25325	0.286	0.379	0.0160775
Gng12	0.000304593	0.434917	0.294	0.379	1
Srm	9.92864e-57	-1.02494	0.129	0.378	2.31744e-52
Mcee	4.21636e-42	-0.573885	0.156	0.378	9.8414e-38
Tmem64	1.78255e-40	-0.456252	0.157	0.378	4.16065e-36
Aimp1	2.7636e-21	0.25242	0.213	0.378	6.45052e-17
Mfsd1	5.27316e-07	0.355392	0.279	0.378	0.0123081
Rbbp6	1.77147e-06	0.323153	0.281	0.378	0.0413478
2400003C14Rik	3.32274e-06	0.284253	0.288	0.378	0.077556
Rb1cc1	0.00290897	0.600399	0.302	0.378	1
Ptprs	1.46413e-108	-2.19955	0.033	0.377	3.41743e-104
Rab34	4.05275e-99	-2.10481	0.05	0.377	9.45953e-95
Mapk9	2.125e-48	-0.61307	0.136	0.377	4.95996e-44
Zfp266	2.80755e-08	0.439181	0.257	0.377	0.000655309
Pnn	5.84171e-07	0.298964	0.273	0.377	0.0136351
Pcif1	1.32363e-05	0.326679	0.295	0.377	0.308948
Fam96b	0.10771	0.471538	0.305	0.377	1
Nbeal1	0.234549	0.564741	0.333	0.377	1
Ncor2	6.71818e-47	-0.600776	0.14	0.376	1.56809e-42
Cnpy3	5.32173e-46	-0.690071	0.146	0.376	1.24215e-41
Mpp1	1.34614e-30	-0.271549	0.178	0.375	3.14202e-26
Sft2d1	3.96538e-09	1.0418	0.4	0.375	9.2556e-05
C230081A13Rik	0.155886	0.728923	0.367	0.375	1
Smg7	0.667522	0.53033	0.338	0.375	1
Fn1	1.75907e-46	-0.764534	0.15	0.374	4.10583e-42
Clip1	5.69434e-08	0.314438	0.272	0.374	0.00132912
Cd200	5.44372e-238	2.06762	0.807	0.373	1.27062e-233
Flot1	6.88073e-43	-0.509118	0.146	0.373	1.60603e-38
Pcbd2	1.22353e-38	-0.322125	0.15	0.373	2.85585e-34
B3gnt1	5.75552e-38	-0.324528	0.155	0.373	1.3434e-33
Rit1	4.28402e-07	0.33428	0.261	0.373	0.00999934
Setd3	4.09484e-11	0.339377	0.24	0.372	9.55777e-07
Trappc3	9.74385e-07	0.30562	0.261	0.372	0.0227431
Cd2ap	0.011977	0.903527	0.378	0.372	1
Arrdc3	1.42468e-99	-2.02982	0.042	0.371	3.32535e-95
Dnajb4	1.3688e-60	-0.870485	0.108	0.371	3.19492e-56
Enc1	1.08435e-53	-1.04117	0.129	0.371	2.53097e-49
Gnptg	1.97273e-47	-0.741678	0.138	0.371	4.60456e-43
Daam1	5.54884e-46	-0.313947	0.138	0.371	1.29515e-41
Limd1	2.83815e-33	-0.664644	0.179	0.371	6.62453e-29
Ppp3r1	1.21843e-14	0.275236	0.224	0.371	2.84394e-10
Gars	8.49659e-10	0.320197	0.254	0.371	1.98319e-05
Cflar	0.078369	0.753118	0.316	0.371	1
Cmpk1	0.143791	0.640671	0.313	0.371	1
Ets1	1.89802e-260	2.2124	0.816	0.37	4.43017e-256
Plekhf1	7.83057e-93	-2.40203	0.059	0.37	1.82773e-88
Klf10	1.68744e-09	0.28376	0.257	0.37	3.93866e-05
Per1	2.2389e-06	0.255804	0.279	0.37	0.0522583
U2af2	8.55135e-05	0.319432	0.28	0.37	1
Hipk1	0.00804514	0.790355	0.381	0.37	1
Jam2	0	2.48724	0.856	0.369	0
Mllt4	6.15179e-192	2.46563	0.751	0.369	1.43589e-187
Bmp1	3.6199e-63	-1.09145	0.11	0.369	8.4492e-59
Cnpy4	1.1606e-44	-0.70117	0.144	0.369	2.70895e-40
Cndp2	1.86866e-33	-0.496604	0.172	0.369	4.36164e-29
Slco2b1	1.05526e-31	-0.422689	0.184	0.369	2.46309e-27
Nop58	1.38668e-23	-0.37828	0.205	0.369	3.23664e-19
Polr2g	2.70307e-05	0.290523	0.267	0.369	0.630924
Ccdc85b	4.18868e-131	1.69974	0.65	0.368	9.77681e-127
Antxr1	1.8388e-113	-3.31694	0.022	0.368	4.29195e-109
Sfxn3	7.98856e-35	-0.365158	0.164	0.368	1.86461e-30
Lsm6	1.66119e-08	0.402358	0.251	0.368	0.000387739
H2-Aa	2.59218e-05	-5.49668	0.306	0.368	0.60504
Cdkn1c	1.11433e-83	1.68372	0.599	0.367	2.60097e-79
Osbpl1a	1.80982e-59	-0.912188	0.113	0.367	4.22431e-55
Slc25a17	9.40998e-50	-0.63935	0.127	0.367	2.19638e-45
Armcx3	2.8383e-49	-0.579336	0.127	0.367	6.62487e-45
Fundc1	6.80657e-40	-0.261183	0.148	0.367	1.58872e-35
Ilf3	2.22686e-24	-0.31731	0.196	0.367	5.19772e-20
Rnf4	5.72033e-06	0.433746	0.274	0.367	0.133518
Ubn1	5.68393e-05	0.29615	0.28	0.367	1
Vcan	4.22101e-110	-3.97881	0.028	0.366	9.85225e-106
Bet1l	2.84425e-40	-0.347573	0.145	0.366	6.63877e-36
Bcl10	0.363229	0.625476	0.325	0.366	1
Ebf2	6.56519e-114	-3.64742	0.019	0.365	1.53238e-109
Itih5	5.01452e-103	-4.12994	0.042	0.365	1.17044e-98
Soat1	7.84861e-86	-1.53238	0.061	0.365	1.83194e-81
Rab3il1	6.3778e-85	-2.1647	0.07	0.365	1.48864e-80
Aga	7.27842e-62	-0.856122	0.103	0.365	1.69886e-57
Fez2	1.8636e-39	1.32424	0.51	0.365	4.34984e-35
l7Rn6	2.97875e-34	-0.26076	0.158	0.365	6.95269e-30
Rab5b	5.51271e-10	0.254921	0.24	0.365	1.28672e-05
Hif1a	1.05351e-07	0.303859	0.263	0.365	0.002459
Rnps1	2.65101e-07	0.327366	0.262	0.365	0.00618772
Dars	3.05375e-06	0.427089	0.266	0.365	0.0712776
Ctdsp1	2.35486e-05	0.64403	0.271	0.365	0.549649
Vcl	0.831093	0.632962	0.329	0.365	1
Cyp1b1	3.59744e-112	-3.96739	0.022	0.364	8.39679e-108
Lrrc17	7.96454e-111	-4.17811	0.026	0.364	1.859e-106
Osr1	1.42472e-104	-4.24909	0.038	0.364	3.32543e-100
Sspn	6.47074e-95	-1.9851	0.047	0.364	1.51034e-90
Echs1	4.08265e-30	-0.288969	0.173	0.364	9.52932e-26
Klf7	6.70657e-22	1.0899	0.472	0.364	1.56538e-17
Pla2g16	4.33323e-06	0.340311	0.254	0.364	0.101142
Prpf38b	0.000979518	0.344939	0.292	0.364	1
Rps4y2	0.0582538	0.61199	0.346	0.364	1
St3gal4	9.32388e-51	-0.845336	0.125	0.363	2.17629e-46
Fads1	6.59349e-50	-0.375147	0.122	0.363	1.53899e-45
Ccdc127	5.04847e-42	-0.548483	0.142	0.363	1.17836e-37
Wwtr1	3.11119e-28	1.21272	0.487	0.363	7.26182e-24
Tsnax	1.42536e-11	1.25114	0.41	0.363	3.32692e-07
Tpp2	3.82013e-08	0.298695	0.258	0.363	0.000891656
Plscr4	0.000236573	1.05353	0.393	0.363	1
Dnttip2	0.000370066	0.495537	0.282	0.363	1
Sertad2	0.017871	0.744533	0.37	0.363	1
Cxxc5	4.10174e-31	-0.396287	0.168	0.362	9.57388e-27
Sec24c	2.0581e-06	0.278994	0.264	0.362	0.0480381
Atxn1	3.20575e-05	0.878422	0.393	0.362	0.748255
P2ry12	0.0486246	-2.02357	0.316	0.362	1
Slc9a3r2	0	2.64895	0.911	0.361	0
Art4	8.00067e-114	-4.19213	0.017	0.361	1.86744e-109
Kank2	2.80398e-75	-1.24427	0.075	0.361	6.54478e-71
Tiparp	8.40896e-69	-1.66774	0.097	0.361	1.96274e-64
Ankrd17	1.2719e-13	0.270042	0.23	0.361	2.96875e-09
Tspan4	9.6186e-06	0.823537	0.378	0.361	0.224508
Ltbr	0.0519632	0.635835	0.285	0.361	1
Spon2	1.45266e-84	-4.38161	0.076	0.36	3.39066e-80
Nfkbiz	1.23919e-30	-0.892539	0.176	0.36	2.89239e-26
Mfap1a	1.74695e-05	0.461608	0.272	0.36	0.407755
4933407C03Rik	0.000120151	1.01309	0.395	0.36	1
Papss2	0.0450968	0.478103	0.376	0.36	1
Klhl13	7.80778e-96	-2.36683	0.043	0.359	1.82241e-91
Tnfaip6	8.07627e-72	-2.85288	0.098	0.359	1.88508e-67
Tmem9	6.25533e-61	-0.961797	0.103	0.359	1.46006e-56
Ccng1	1.32932e-37	-0.666231	0.15	0.359	3.10275e-33
Ryk	5.39201e-35	-0.312607	0.152	0.359	1.25855e-30
Cask	6.76616e-24	-0.269494	0.194	0.359	1.57929e-19
Mkrn1	1.19054e-22	0.310433	0.191	0.359	2.77884e-18
Llph	6.06066e-11	0.346798	0.232	0.359	1.41462e-06
Maml2	3.40719e-08	0.322396	0.252	0.359	0.000795273
Stim2	6.69405e-07	0.883589	0.41	0.359	0.0156246
Nrd1	1.39263e-05	0.341208	0.269	0.359	0.325053
Herc2	0.00054873	0.322996	0.291	0.359	1
Cab39	0.00394666	0.400754	0.294	0.359	1
Slc44a2	0.329243	0.761543	0.342	0.359	1
Plscr3	0.355657	0.676543	0.324	0.359	1
2210016F16Rik	1.50692e-63	-1.11744	0.092	0.358	3.5173e-59
Sec23ip	4.02083e-13	0.273362	0.223	0.358	9.38502e-09
Kpnb1	1.87289e-12	0.411115	0.229	0.358	4.37152e-08
Zdhhc20	0.00248971	0.511697	0.288	0.358	1
Ankrd12	0.21133	0.547353	0.316	0.358	1
Fli1	9.11232e-231	2.03638	0.801	0.357	2.12691e-226
Sirpa	4.45502e-82	-3.50955	0.075	0.357	1.03985e-77
Utrn	2.64967e-79	1.60225	0.6	0.357	6.18459e-75
Cabin1	2.64783e-47	-0.809025	0.127	0.357	6.1803e-43
Cdc42bpa	0.00265004	0.823061	0.375	0.357	1
Ei24	0.0131477	0.644586	0.276	0.357	1
Rnf114	0.0347715	0.606478	0.298	0.357	1
0610010O12Rik	6.70692e-83	-2.00201	0.065	0.356	1.56546e-78
Exosc8	5.72741e-20	-0.323725	0.209	0.356	1.33684e-15
Ctbp2	0.129605	0.565551	0.306	0.356	1
Cercam	4.57659e-105	-3.48214	0.027	0.355	1.06822e-100
Adk	5.8532e-79	-1.94286	0.073	0.355	1.36619e-74
1810009A15Rik	6.48262e-14	0.263855	0.209	0.355	1.51311e-09
Stag1	4.8846e-10	0.298623	0.238	0.355	1.14011e-05
Ppil4	6.10402e-07	0.267473	0.257	0.355	0.0142474
Atp6v1a	7.2744e-05	0.371676	0.273	0.355	1
Api5	0.000333834	0.594954	0.277	0.355	1
Fubp1	0.242579	0.761995	0.34	0.355	1
Dclk1	2.47835e-105	-3.15524	0.026	0.354	5.78471e-101
Aspn	2.54813e-100	-3.58172	0.035	0.354	5.94759e-96
Tgm2	2.18427e-91	1.65423	0.619	0.354	5.09831e-87
Tmem140	8.88068e-48	1.29583	0.513	0.354	2.07284e-43
Tmed1	8.19656e-46	-0.746665	0.129	0.354	1.91316e-41
Snx4	1.98389e-37	-0.272666	0.14	0.354	4.63059e-33
Nampt	1.84491e-34	-0.394696	0.156	0.354	4.30621e-30
Csf1r	8.22127e-19	-5.5168	0.228	0.354	1.91893e-14
Ddx42	2.47318e-09	0.335017	0.24	0.354	5.77266e-05
Ube2g2	2.23481e-08	0.306679	0.245	0.354	0.000521627
Dda1	5.50702e-08	0.293647	0.249	0.354	0.00128539
Itsn2	7.80676e-06	0.860414	0.388	0.354	0.182218
Bag5	0.00450304	0.801368	0.359	0.354	1
Lzts2	0.212339	0.45194	0.31	0.354	1
Bmpr1a	1.14562e-105	-2.51524	0.021	0.353	2.67399e-101
Cd248	2.58027e-100	-4.07386	0.036	0.353	6.02261e-96
Zcchc24	3.36149e-28	-0.327047	0.172	0.353	7.84605e-24
Fh1	3.22362e-23	-0.283131	0.189	0.353	7.52425e-19
Ubfd1	7.24471e-12	0.276903	0.223	0.353	1.69099e-07
Icam1	9.69611e-10	0.255378	0.249	0.353	2.26317e-05
Ss18	6.66842e-07	0.364965	0.26	0.353	0.0155648
Mef2a	6.74749e-07	0.862116	0.409	0.353	0.0157493
Ptp4a3	4.13624e-75	1.38808	0.58	0.352	9.6544e-71
Ssbp1	8.31446e-47	-0.577183	0.126	0.351	1.94068e-42
Ift27	8.0092e-45	-0.409369	0.119	0.351	1.86943e-40
Bscl2	5.83321e-42	-0.6393	0.139	0.351	1.36153e-37
Eci2	2.99754e-09	0.337627	0.234	0.351	6.99656e-05
Wipi1	3.53614e-61	-0.894872	0.093	0.35	8.2537e-57
Fech	3.74901e-49	-0.472564	0.116	0.35	8.75057e-45
Arl5a	6.38867e-37	-0.533671	0.146	0.35	1.49118e-32
Syne2	6.44851e-08	0.828555	0.409	0.35	0.00150515
Mast4	0.00651392	0.491204	0.29	0.35	1
Pigs	3.38127e-51	-0.810401	0.116	0.349	7.89222e-47
Timm17b	1.53151e-29	-0.433182	0.161	0.349	3.57469e-25
Dnajc7	0.000151096	0.500759	0.266	0.349	1
3110003A17Rik	0.00322659	0.573604	0.27	0.349	1
Cntfr	1.37957e-104	-3.30519	0.021	0.348	3.22005e-100
Scd1	4.0715e-93	-3.17914	0.043	0.348	9.50329e-89
Ppp2r3a	5.66106e-48	-0.713209	0.119	0.348	1.32135e-43
Bace1	6.04169e-35	-0.293724	0.144	0.348	1.41019e-30
Prkcsh	1.42864e-31	-0.327629	0.154	0.348	3.33459e-27
Nudt16l1	5.80643e-28	-0.353291	0.167	0.348	1.35528e-23
Armc1	1.63032e-11	0.345017	0.221	0.348	3.80533e-07
Zmym5	7.46487e-10	0.322313	0.232	0.348	1.74238e-05
Cdk9	1.04445e-07	0.292103	0.243	0.348	0.00243784
Dock1	3.40537e-07	0.748419	0.399	0.348	0.00794848
5133401N09Rik	0.00561258	0.605371	0.277	0.348	1
Gtl3	0.332373	0.710989	0.299	0.348	1
Igfbp3	0.943996	-0.845359	0.372	0.348	1
Tpm2	4.76046e-88	-2.6097	0.052	0.347	1.11114e-83
Fkbp10	1.18229e-83	-1.88334	0.054	0.347	2.75959e-79
Ppp1r14b	1.06856e-64	-1.28632	0.087	0.347	2.49413e-60
Taok3	5.84955e-58	-0.881893	0.096	0.347	1.36534e-53
Bin1	5.06596e-48	-1.337	0.132	0.347	1.18244e-43
Msi2	1.71217e-38	-0.400257	0.138	0.347	3.99638e-34
C1qc	2.67613e-12	-5.43833	0.249	0.347	6.24636e-08
Itpripl1	3.49794e-83	1.67676	0.591	0.346	8.16453e-79
Sdf2l1	1.93773e-43	-0.849031	0.129	0.346	4.52287e-39
Dap3	2.59612e-39	-0.426987	0.136	0.346	6.05961e-35
1810026B05Rik	2.65231e-06	0.341031	0.252	0.346	0.0619075
Cobra1	1.14288e-05	0.322878	0.254	0.346	0.266759
Dync1li2	0.000432841	0.538688	0.267	0.346	1
Kdsr	0.012302	0.579532	0.285	0.346	1
Arhgap5	0.0187104	0.47317	0.289	0.346	1
Ndfip2	0.140144	0.5487	0.291	0.346	1
Lmf2	0.613516	0.684972	0.305	0.346	1
Rhoq	2.38242e-73	-1.10281	0.065	0.345	5.56082e-69
Rab8b	2.99084e-37	-0.369042	0.144	0.345	6.98092e-33
Ssfa2	3.4136e-11	0.336245	0.229	0.345	7.96767e-07
Usp25	0.000214462	0.472155	0.268	0.345	1
Acp2	1.54708e-54	-0.540942	0.103	0.344	3.61104e-50
Tmem219	7.16226e-37	-0.636675	0.143	0.344	1.67174e-32
Pde6d	3.91424e-28	-0.270397	0.161	0.344	9.13622e-24
Dpf2	2.16062e-12	0.295315	0.21	0.344	5.04311e-08
Dab2	1.51858e-08	-0.706354	0.257	0.344	0.000354453
Ggps1	1.58855e-08	0.309535	0.235	0.344	0.000370783
Pak1ip1	0.0174721	0.859644	0.343	0.344	1
Rasa1	0.522628	0.864716	0.326	0.344	1
Il17d	9.97843e-105	-3.26585	0.019	0.343	2.32907e-100
S1pr2	2.98259e-83	-1.44489	0.048	0.343	6.96166e-79
Pld1	2.03998e-74	-0.952471	0.059	0.343	4.76153e-70
Man1a	4.35081e-61	-1.24676	0.092	0.343	1.01552e-56
Rnf5	1.14098e-52	-0.823444	0.106	0.343	2.66315e-48
2020-09-04	3.27057e-52	1.17296	0.535	0.343	7.63385e-48
Limd2	1.58584e-15	-1.35875	0.228	0.343	3.70151e-11
Samd8	2.61285e-11	0.328645	0.221	0.343	6.09866e-07
Atp2c1	2.79547e-06	0.437495	0.248	0.343	0.065249
Med10	0.0336411	0.532417	0.278	0.343	1
Mrc2	2.05735e-109	-3.72903	0.01	0.342	4.80206e-105
Mettl7a1	8.29811e-64	-1.31277	0.084	0.342	1.93686e-59
Gipc1	2.96503e-29	-0.372254	0.155	0.342	6.92067e-25
Irf1	2.8009e-11	1.2061	0.408	0.342	6.53757e-07
Foxn2	8.72271e-10	0.374365	0.224	0.342	2.03597e-05
Arnt	4.01058e-09	0.424931	0.234	0.342	9.3611e-05
Tardbp	1.49044e-06	0.255973	0.251	0.342	0.0347883
Gigyf1	1.42319e-05	0.462598	0.253	0.342	0.332187
Stx2	0.0172373	0.488734	0.284	0.342	1
Rc3h1	0.055067	0.419949	0.29	0.342	1
Cav1	0	3.24429	0.961	0.341	0
Anpep	1.90295e-106	-2.40589	0.013	0.341	4.44167e-102
Dtymk	5.11793e-47	-0.548002	0.114	0.341	1.19457e-42
Ap3b1	1.46086e-24	-0.290024	0.172	0.341	3.4098e-20
Gmppa	2.0936e-65	-1.10578	0.076	0.34	4.88668e-61
Ddx47	5.06411e-08	0.268613	0.234	0.34	0.00118201
Tmem93	0.00036557	0.421836	0.257	0.34	1
Map3k3	0.00826472	0.605453	0.278	0.34	1
Nosip	0.38521	0.732743	0.314	0.34	1
Meg3	4.14181e-103	-2.96762	0.019	0.339	9.66741e-99
Mdk	2.28498e-98	-3.30353	0.027	0.339	5.33336e-94
Ahcyl1	1.86758e-39	-0.694061	0.131	0.339	4.35912e-35
Setd5	9.52246e-06	0.319863	0.256	0.339	0.222264
Fam76a	0.272235	0.57338	0.29	0.339	1
Mtus1	0.854644	0.476237	0.325	0.339	1
Ninj1	5.78264e-30	-0.952693	0.161	0.338	1.34973e-25
Kctd10	5.16153e-28	1.38558	0.447	0.338	1.20475e-23
Ptplb	2.10146e-25	-0.2725	0.164	0.338	4.90503e-21
3230401D17Rik	2.35032e-05	0.461836	0.242	0.338	0.548588
Adamtsl2	1.20573e-100	-3.61253	0.022	0.337	2.8143e-96
Pon3	1.58206e-73	-1.65433	0.066	0.337	3.69269e-69
Col8a1	2.05321e-64	-1.51144	0.08	0.337	4.79239e-60
Sh3kbp1	9.35171e-57	-0.721361	0.092	0.337	2.18278e-52
Npm3	9.74918e-56	-0.867864	0.091	0.337	2.27556e-51
H2-Q4	1.59381e-41	1.18325	0.515	0.337	3.72011e-37
Lbr	1.14606e-40	1.38596	0.504	0.337	2.67501e-36
Zwint	4.03279e-36	-0.569561	0.134	0.337	9.41292e-32
Sephs2	3.75357e-22	-0.331366	0.182	0.337	8.76121e-18
Cdipt	4.86248e-14	1.12514	0.415	0.337	1.13495e-09
Dbndd2	4.7922e-10	0.298607	0.219	0.337	1.11855e-05
Nemf	1.7163e-08	0.469182	0.226	0.337	0.000400603
Lifr	3.28589e-05	0.595833	0.388	0.337	0.766959
Ddx46	0.000147862	0.492388	0.257	0.337	1
Crtc3	5.37647e-72	-1.34437	0.062	0.336	1.25492e-67
Elovl5	2.5265e-44	1.50278	0.512	0.336	5.89711e-40
Rcbtb2	2.50263e-30	-0.308209	0.155	0.336	5.84139e-26
Triobp	5.52927e-22	1.26718	0.444	0.336	1.29059e-17
Med21	3.71427e-10	0.299476	0.212	0.336	8.66948e-06
Cttnbp2nl	0.000161863	0.650374	0.377	0.336	1
1810031K17Rik	0.00343093	0.528182	0.263	0.336	1
Fabp5	3.79553e-211	1.04721	0.764	0.335	8.85914e-207
Gpr153	3.68122e-106	-3.71706	0.01	0.335	8.59235e-102
Btd	4.83775e-43	-0.666597	0.122	0.335	1.12918e-38
Pih1d1	1.34092e-39	-0.445495	0.122	0.335	3.12984e-35
Cyhr1	4.19393e-36	-0.74726	0.139	0.335	9.78906e-32
Asap1	0.0254138	0.485897	0.287	0.335	1
Adam17	0.0406657	0.602227	0.285	0.335	1
2210013O21Rik	0.050002	0.468696	0.275	0.335	1
Jam3	0.211989	0.599195	0.325	0.335	1
Pbx1	3.81396e-34	-0.448024	0.143	0.334	8.90215e-30
Srprb	9.8668e-26	-0.326189	0.162	0.334	2.30301e-21
Nck1	1.57095e-15	1.19175	0.418	0.334	3.66675e-11
Esyt1	5.15418e-13	0.257835	0.202	0.334	1.20304e-08
Hiatl1	3.74239e-07	0.326356	0.237	0.334	0.0087351
Usp4	0.000594509	0.514623	0.26	0.334	1
Cdk12	0.33525	0.739883	0.3	0.334	1
E030003E18Rik	4.60375e-107	-2.31971	0.007	0.333	1.07456e-102
Ntn1	4.43753e-80	-1.99557	0.048	0.333	1.03576e-75
Deb1	3.01744e-36	-0.353142	0.13	0.333	7.043e-32
Ube2a	1.49706e-06	0.26711	0.24	0.333	0.0349428
Tbl1x	2.69222e-06	0.384136	0.24	0.333	0.062839
Phf20l1	4.62048e-05	0.887372	0.374	0.333	1
Arhgef2	0.108296	0.701263	0.341	0.333	1
Svep1	2.95502e-95	-3.53594	0.028	0.332	6.8973e-91
Glipr2	6.77499e-92	-2.90886	0.033	0.332	1.58135e-87
Parp3	2.59672e-85	-2.0928	0.039	0.332	6.061e-81
Nrip1	2.23326e-56	-0.722752	0.09	0.332	5.21266e-52
Adam9	1.86361e-53	-0.849987	0.098	0.332	4.34985e-49
Calcrl	5.10762e-48	1.20775	0.53	0.332	1.19217e-43
Smarcc1	1.12945e-47	-0.67418	0.111	0.332	2.63624e-43
Hgsnat	3.90591e-35	-0.311736	0.134	0.332	9.11678e-31
Aggf1	4.3874e-07	0.322394	0.232	0.332	0.0102406
Chtf8	4.90957e-05	0.337316	0.248	0.332	1
Acot9	0.156141	0.550994	0.284	0.332	1
Rnpepl1	0.171192	0.728685	0.328	0.332	1
Cep170	1.61815e-36	-0.548822	0.133	0.331	3.77693e-32
Zadh2	2.53372e-35	-0.344289	0.136	0.331	5.91395e-31
Slc25a12	6.1165e-32	-0.351929	0.14	0.331	1.42765e-27
9030624J02Rik	1.74174e-30	-0.265227	0.151	0.331	4.0654e-26
Wdr33	4.92178e-10	0.261348	0.218	0.331	1.14879e-05
Tmx3	9.38835e-08	0.335648	0.235	0.331	0.00219133
Sf3a3	1.19065e-07	0.338784	0.223	0.331	0.00277909
Fyn	8.73225e-05	0.893475	0.361	0.331	1
Fbxl3	0.000319857	0.653301	0.258	0.331	1
St3gal6	0.112745	0.636703	0.327	0.331	1
Vgll4	0.451174	0.378047	0.302	0.331	1
Pde1a	4.8339e-104	-3.9382	0.011	0.33	1.12828e-99
Cnp	1.22745e-11	-0.456148	0.226	0.33	2.865e-07
Map2k3	0.0178037	0.610222	0.268	0.33	1
Cept1	0.030001	0.567577	0.271	0.33	1
Trp53i13	1.59592e-49	-0.815157	0.1	0.329	3.72503e-45
Ppp2r5a	1.3619e-25	1.14468	0.455	0.329	3.17882e-21
Gatad2a	2.58301e-13	1.12274	0.413	0.329	6.029e-09
Gbp2	1.28804e-08	1.03367	0.378	0.329	0.000300641
Smek1	2.19937e-08	0.34288	0.223	0.329	0.000513355
Ptpn11	5.90339e-07	0.330054	0.234	0.329	0.0137791
C1qtnf2	7.4642e-89	-2.58683	0.035	0.328	1.74222e-84
Efemp1	2.28538e-74	-4.64386	0.068	0.328	5.33429e-70
Isoc1	1.38745e-50	-0.849904	0.099	0.328	3.23846e-46
Ccdc53	3.68981e-33	-0.404577	0.134	0.328	8.61238e-29
Tmem184b	1.47343e-25	1.41643	0.45	0.328	3.43913e-21
C230096C10Rik	7.89152e-11	0.363115	0.212	0.328	1.84196e-06
Ctnnd1	8.29244e-07	0.899625	0.39	0.328	0.0193554
Gpbp1l1	0.000530647	0.343032	0.255	0.328	1
Cdc42ep5	1.59006e-61	-1.20376	0.074	0.327	3.71135e-57
Wwp1	6.45181e-46	-0.664816	0.107	0.327	1.50592e-41
Creb3l2	2.01028e-44	-0.919538	0.113	0.327	4.6922e-40
0610007P14Rik	3.4929e-31	-0.337071	0.142	0.327	8.15277e-27
Gadd45g	1.24218e-23	-0.916002	0.175	0.327	2.89936e-19
Clock	1.75344e-13	0.289546	0.201	0.327	4.09271e-09
Gm9781	1.54018e-10	0.257681	0.197	0.327	3.59493e-06
Mpzl1	2.16238e-09	1.02151	0.388	0.327	5.0472e-05
1700020I14Rik	6.45773e-07	1.00132	0.365	0.327	0.015073
Slbp	2.48906e-06	0.358898	0.229	0.327	0.058097
Nbr1	4.4776e-06	0.36161	0.24	0.327	0.104512
Akirin1	9.86398e-06	0.379093	0.239	0.327	0.230235
Irf3	0.000406209	0.555259	0.244	0.327	1
Mta2	0.866025	0.644011	0.302	0.327	1
Manbal	4.37053e-35	-0.359516	0.127	0.326	1.02013e-30
D10Jhu81e	1.23233e-33	-0.544618	0.133	0.326	2.87637e-29
Ndufs1	5.75231e-20	-0.289997	0.18	0.326	1.34265e-15
Igf1r	8.66007e-07	0.303019	0.234	0.326	0.0202135
Ppm1g	6.73966e-06	0.317838	0.234	0.326	0.15731
Nckap1	0.687391	0.417107	0.303	0.326	1
Slk	0.875218	0.637389	0.305	0.326	1
Gbp7	1.46196e-64	1.74196	0.54	0.325	3.41236e-60
Nme3	1.0975e-45	-0.65826	0.1	0.325	2.56168e-41
Sec23a	7.03427e-40	-0.451793	0.121	0.325	1.64187e-35
C1qa	1.18938e-15	-5.28346	0.214	0.325	2.77613e-11
Ppp1r15a	3.7355e-10	-0.365831	0.227	0.325	8.71904e-06
Ergic2	6.19366e-10	0.250993	0.213	0.325	1.44566e-05
Snf8	7.64725e-05	0.411335	0.24	0.325	1
Unc119b	0.73632	0.698162	0.307	0.325	1
Tek	5.28689e-96	1.41408	0.637	0.324	1.23401e-91
9030425E11Rik	2.59134e-93	-3.91064	0.027	0.324	6.04845e-89
Daglb	1.31419e-50	-0.771129	0.097	0.324	3.06744e-46
Acly	3.22163e-26	1.58877	0.437	0.324	7.51962e-22
Hgs	8.56575e-07	0.265311	0.227	0.324	0.0199933
Letm1	3.47138e-06	0.343241	0.232	0.324	0.0810255
Lsamp	4.02139e-96	-4.36314	0.022	0.323	9.38633e-92
5430435G22Rik	2.31833e-94	-4.08517	0.024	0.323	5.41122e-90
Tmem107	1.49432e-88	-2.36144	0.03	0.323	3.4879e-84
Ak1	7.40706e-71	-1.82467	0.061	0.323	1.72888e-66
Dhrs1	5.74055e-43	-0.864531	0.115	0.323	1.3399e-38
D19Bwg1357e	5.92847e-40	-0.72948	0.12	0.323	1.38377e-35
Sp1	1.81784e-05	0.542035	0.239	0.323	0.424302
Stat1	5.84283e-05	0.738591	0.366	0.323	1
Rad21	0.00314384	0.423372	0.265	0.323	1
Fnbp1	1.94885e-58	-1.2535	0.083	0.322	4.54882e-54
Ids	2.93e-15	0.280781	0.188	0.322	6.83891e-11
Ttc14	1.83783e-10	0.540001	0.205	0.322	4.28968e-06
Leng8	0.162477	0.715137	0.279	0.322	1
Scn1b	3.01713e-81	-1.9526	0.039	0.321	7.04229e-77
Specc1l	1.80226e-28	-0.40635	0.148	0.321	4.20665e-24
Loxl3	2.14616e-90	-3.42404	0.026	0.32	5.00936e-86
Rap2a	1.74749e-39	-0.29964	0.115	0.32	4.07881e-35
Chmp4b	6.88892e-28	-0.395484	0.145	0.32	1.60794e-23
Dynll2	2.23011e-25	-0.376148	0.152	0.32	5.2053e-21
Rai12	1.09167e-08	0.28213	0.212	0.32	0.000254806
AI462493	7.33746e-06	0.405462	0.229	0.32	0.171264
4632428N05Rik	0.100098	-0.254813	0.295	0.32	1
Mafb	2.8672e-73	-3.84707	0.061	0.319	6.69234e-69
Dnlz	4.25645e-40	-0.458163	0.11	0.319	9.93499e-36
Pnpla2	6.84209e-33	1.31069	0.455	0.319	1.59701e-28
Gm6682	4.45128e-24	-0.25813	0.155	0.319	1.03897e-19
Ttc35	6.71502e-08	0.298776	0.217	0.319	0.00156735
Unc5b	0.00080623	0.769604	0.358	0.319	1
Wsb1	0.664236	0.770027	0.294	0.319	1
Mpnd	1.21712e-44	-0.917691	0.108	0.318	2.84088e-40
Naga	6.05752e-41	-0.687149	0.113	0.318	1.41389e-36
AI316807	3.9922e-30	-0.434142	0.141	0.318	9.3182e-26
D19Wsu162e	2.64118e-28	-0.600263	0.149	0.318	6.16478e-24
Snx22	1.73348e-22	-0.367005	0.155	0.318	4.04612e-18
Actr1b	8.46822e-06	0.478664	0.227	0.318	0.197657
Rrs1	1.93456e-47	-1.00782	0.099	0.317	4.51546e-43
Gypc	1.26276e-35	-0.638599	0.121	0.317	2.94741e-31
Poldip2	4.93649e-27	-0.335616	0.148	0.317	1.15223e-22
Nt5c	8.026e-08	0.34448	0.208	0.317	0.00187335
Ppp2r2d	2.80949e-07	0.510855	0.221	0.317	0.00655763
Pdzd8	0.0046449	0.556845	0.253	0.317	1
Lypla1	0.110077	0.788137	0.266	0.317	1
Adcy7	1.74904e-96	-3.21699	0.014	0.316	4.08243e-92
S1pr3	8.15104e-94	-3.57048	0.018	0.316	1.90254e-89
Scd2	3.70674e-61	-1.71895	0.075	0.316	8.65191e-57
Ufsp2	2.50609e-38	-0.401475	0.117	0.316	5.84947e-34
Pigyl	3.32848e-34	-0.394084	0.121	0.316	7.76901e-30
Pitrm1	1.43782e-32	-0.446971	0.133	0.316	3.35601e-28
Ccnh	2.94194e-31	-0.324035	0.133	0.316	6.86678e-27
Tmem214	1.43975e-30	-0.395304	0.138	0.316	3.36053e-26
Ptplad1	1.38001e-27	-0.346477	0.148	0.316	3.22109e-23
Vamp5	8.63527e-08	0.830906	0.364	0.316	0.00201556
Larp4b	0.000126805	0.600554	0.24	0.316	1
Ep400	0.00419575	0.421414	0.256	0.316	1
Baz2b	0.519062	0.692233	0.286	0.316	1
Pi15	3.88582e-93	-3.31565	0.018	0.315	9.0699e-89
Hic1	1.88362e-39	-0.704692	0.11	0.315	4.39655e-35
Id1	4.69885e-227	1.93446	0.759	0.314	1.09676e-222
Frmd6	5.24721e-78	-2.05653	0.041	0.314	1.22475e-73
Tmem100	9.22704e-63	-1.8987	0.072	0.314	2.15368e-58
Usp5	4.60882e-36	-0.532105	0.121	0.314	1.07574e-31
Ide	5.75192e-31	-0.443612	0.133	0.314	1.34256e-26
Bambi	5.48868e-30	-0.676614	0.138	0.314	1.28111e-25
Urod	3.64855e-24	-0.391056	0.156	0.314	8.51608e-20
Lrrc32	3.11475e-39	-0.698796	0.111	0.313	7.27013e-35
Ccdc90a	2.05521e-31	-0.275526	0.132	0.313	4.79706e-27
Nmi	2.33323e-10	0.961888	0.392	0.313	5.446e-06
Ext1	0.000363598	0.44441	0.246	0.313	1
Ngf	1.08555e-94	-3.36472	0.014	0.312	2.53379e-90
Dbn1	1.71147e-75	-2.02976	0.043	0.312	3.99475e-71
Dcakd	2.304e-49	-1.01208	0.088	0.312	5.37777e-45
Cirbp	3.84128e-26	-0.360609	0.144	0.312	8.96592e-22
H2-Eb1	1.32116e-14	-5.56875	0.202	0.312	3.08373e-10
Fam114a2	5.84244e-07	0.562979	0.217	0.312	0.0136368
Fbxw11	1.26209e-05	0.352514	0.232	0.312	0.294584
Dnajc5	0.000107153	0.510723	0.235	0.312	1
Cd36	0	4.17491	0.987	0.311	0
Pppde1	2.7746e-31	-0.287912	0.128	0.311	6.47619e-27
Snx12	9.96428e-30	-0.453973	0.137	0.311	2.32576e-25
Tmem222	9.67987e-28	-0.284641	0.138	0.311	2.25938e-23
Mfap3	0.000152531	0.514519	0.238	0.311	1
Pgd	1.52865e-28	-0.498398	0.141	0.31	3.56802e-24
2810422J05Rik	9.50837e-27	-0.326508	0.143	0.31	2.21935e-22
Med29	2.81533e-13	0.287155	0.179	0.31	6.57126e-09
2410002O22Rik	1.24229e-08	0.312665	0.21	0.31	0.000289963
Necap2	0.000564385	0.336147	0.234	0.31	1
9430020K01Rik	4.22222e-103	1.81132	0.602	0.309	9.85509e-99
Tmem39a	1.2823e-45	-0.887758	0.097	0.309	2.99301e-41
Slco3a1	6.66241e-38	-0.627797	0.112	0.309	1.55507e-33
Gstk1	1.46771e-37	-0.408056	0.109	0.309	3.42578e-33
Fam173a	3.42055e-32	-0.4175	0.123	0.309	7.98391e-28
Ap1b1	9.86939e-28	-0.517045	0.142	0.309	2.30361e-23
Xaf1	8.41437e-26	1.04089	0.443	0.309	1.964e-21
Cyp2d22	1.03444e-05	1.03541	0.352	0.309	0.241449
Glyr1	1.0649e-05	0.288263	0.233	0.309	0.248558
Ezh1	0.00537445	0.462939	0.253	0.309	1
Smtnl2	3.3782e-48	-0.937449	0.09	0.308	7.88505e-44
Tpst2	3.98877e-46	1.48615	0.49	0.308	9.31018e-42
Mkl2	3.02234e-18	1.05393	0.419	0.308	7.05444e-14
Epn2	2.94772e-17	1.2495	0.409	0.308	6.88027e-13
Phf5a	1.48262e-06	0.373795	0.211	0.308	0.0346058
Riok3	2.07973e-06	0.502357	0.218	0.308	0.0485429
Atf3	9.01072e-05	-0.616093	0.253	0.308	1
Foxp2	4.77282e-93	-3.49453	0.014	0.307	1.11402e-88
Hand2	4.9965e-91	-1.92006	0.014	0.307	1.16623e-86
Stbd1	9.37259e-81	-3.26995	0.036	0.307	2.18766e-76
Fam124a	4.2803e-66	-1.47128	0.054	0.307	9.99064e-62
Cited2	2.7848e-51	-1.5842	0.088	0.307	6.5e-47
Rgs2	5.39442e-48	-2.1521	0.101	0.307	1.25911e-43
Rora	6.84378e-48	-0.777794	0.088	0.307	1.59741e-43
Pygb	1.06674e-42	-0.834896	0.1	0.307	2.48989e-38
Arhgap21	1.23513e-34	-0.451506	0.12	0.307	2.88293e-30
Acot13	4.66182e-32	-0.657243	0.125	0.307	1.08812e-27
Mcart1	1.58143e-08	0.30525	0.208	0.307	0.000369122
Aida	5.82782e-05	0.375814	0.234	0.307	1
Apc	0.118657	0.785171	0.313	0.307	1
Msl1	0.622655	0.590639	0.282	0.307	1
Clip3	2.71673e-91	-3.88129	0.017	0.306	6.34112e-87
G6pdx	1.79539e-56	-1.40433	0.076	0.306	4.19061e-52
Prkcd	3.82086e-53	-0.964984	0.081	0.306	8.91828e-49
Psmb9	5.44268e-38	1.20651	0.46	0.306	1.27038e-33
Zfp809	1.71164e-37	-0.577593	0.11	0.306	3.99513e-33
Spsb3	8.26331e-26	-0.267434	0.142	0.306	1.92874e-21
Bok	5.69137e-19	-0.343071	0.163	0.306	1.32842e-14
Cnot2	2.70188e-08	0.255258	0.206	0.306	0.000630645
Smad4	1.32231e-06	0.353563	0.219	0.306	0.030864
Cpsf6	0.00030235	0.553012	0.231	0.306	1
Elf2	0.154961	0.505444	0.263	0.306	1
Plekha6	2.87142e-88	-2.66502	0.018	0.305	6.70217e-84
Egfr	1.31131e-84	-3.74476	0.028	0.305	3.06072e-80
Sgms1	1.26872e-60	1.50682	0.525	0.305	2.96131e-56
Hps3	1.39052e-51	-0.966422	0.079	0.305	3.24561e-47
Wipf1	5.91946e-27	-0.273352	0.136	0.305	1.38166e-22
Crot	2.60818e-24	-0.357049	0.149	0.305	6.08776e-20
Nfkb1	3.90512e-05	0.706254	0.228	0.305	0.911494
Bnip3	0.0113495	0.815192	0.311	0.305	1
Mark2	0.0310608	0.548185	0.25	0.305	1
Il33	1.90864e-73	-3.18189	0.048	0.304	4.45496e-69
Atp1b2	1.18374e-31	-0.940686	0.126	0.304	2.76297e-27
Arfgap1	6.13431e-27	-0.304932	0.136	0.304	1.43181e-22
Alg5	4.40045e-08	0.335235	0.199	0.304	0.00102711
Shoc2	0.00119608	0.324128	0.235	0.304	1
Rnf44	0.261054	0.550742	0.303	0.304	1
Olfm1	5.97361e-80	-2.18066	0.03	0.303	1.3943e-75
Lrp4	1.45612e-69	-1.25847	0.047	0.303	3.39873e-65
Cbfa2t3	1.09106e-63	1.03826	0.558	0.303	2.54664e-59
Fam3a	2.20066e-34	-0.288003	0.113	0.303	5.13656e-30
Isca2	4.08823e-08	0.358497	0.195	0.303	0.000954233
Rps6kb1	8.71267e-07	0.50416	0.212	0.303	0.0203363
Mrpl34	9.17499e-07	0.260294	0.209	0.303	0.0214153
Ankhd1	4.45471e-06	0.449341	0.221	0.303	0.103977
Cyth2	0.000346753	0.469266	0.229	0.303	1
Ier5	0.00616291	0.360837	0.336	0.303	1
AI607873	3.13769e-75	-2.1379	0.04	0.302	7.32369e-71
Man2a2	1.52497e-64	-0.933639	0.054	0.302	3.55944e-60
Tubb4a	1.84161e-55	-3.59597	0.086	0.302	4.2985e-51
Ctsc	6.7711e-41	-4.60665	0.121	0.302	1.58044e-36
Coro1a	1.57615e-18	-4.36326	0.184	0.302	3.6789e-14
Lsm5	7.50495e-13	0.278989	0.174	0.302	1.75173e-08
Pgp	5.46839e-09	0.26257	0.195	0.302	0.000127638
Rbm22	7.83608e-05	0.592454	0.223	0.302	1
Hsd11b1	1.15457e-74	-4.46292	0.044	0.301	2.69488e-70
Fam129a	2.93369e-74	-2.06	0.038	0.301	6.84753e-70
Abhd14a	1.48051e-71	-1.76065	0.044	0.301	3.45566e-67
Pmm1	1.72381e-61	-1.47533	0.06	0.301	4.02355e-57
Tmcc3	1.3944e-51	1.55718	0.5	0.301	3.25468e-47
Rftn1	3.11889e-38	1.59289	0.457	0.301	7.27981e-34
Fam168a	3.48439e-11	0.460395	0.186	0.301	8.13292e-07
Celf1	0.305487	0.590208	0.271	0.301	1
Ube2l6	0.424612	0.794428	0.257	0.301	1
Arl2bp	0.440463	0.689722	0.288	0.301	1
B3gnt9-ps	1.45531e-80	-3.82749	0.033	0.3	3.39685e-76
Antxr2	1.66777e-65	-1.7428	0.055	0.3	3.89274e-61
Lpgat1	3.9795e-39	-0.636285	0.105	0.3	9.28855e-35
Pxmp3	3.59007e-25	-0.28814	0.138	0.3	8.37958e-21
Git2	5.54677e-15	1.21698	0.388	0.3	1.29467e-10
Hsd3b7	2.70189e-10	0.289546	0.194	0.3	6.30649e-06
Socs5	7.47929e-06	0.342374	0.211	0.3	0.174574
Angel2	0.318815	0.817891	0.259	0.3	1
Mndal	1.69965e-59	1.53552	0.521	0.299	3.96716e-55
Creb3l1	2.14997e-50	-1.17928	0.082	0.299	5.01825e-46
Tmem98	5.19303e-24	-0.463201	0.139	0.299	1.2121e-19
1810013L24Rik	4.19776e-13	0.269685	0.18	0.299	9.79799e-09
Rbm6	2.73699e-10	0.269388	0.195	0.299	6.3884e-06
Cbfb	5.51091e-09	0.424059	0.193	0.299	0.00012863
Azin1	0.00389037	0.481061	0.238	0.299	1
Pcdh18	7.79155e-93	-3.32669	0.007	0.298	1.81863e-88
Tor2a	1.28423e-33	-0.506558	0.116	0.298	2.99752e-29
Sdc3	1.83082e-17	0.905875	0.421	0.298	4.27332e-13
Ric8	1.57499e-12	0.433989	0.172	0.298	3.6762e-08
Rbfox2	3.93416e-11	0.317721	0.184	0.298	9.18272e-07
Ptdss1	1.61553e-09	0.377897	0.191	0.298	3.77082e-05
Rnf216	3.99247e-07	0.280015	0.211	0.298	0.00931882
Map2k4	5.98069e-07	0.549843	0.206	0.298	0.0139595
Ngdn	0.00207077	0.523731	0.229	0.298	1
Smek2	0.633056	0.77806	0.271	0.298	1
Apbb1ip	1.16742e-83	-2.85603	0.024	0.297	2.72488e-79
Metrnl	1.46257e-68	-2.24199	0.05	0.297	3.41378e-64
Pip4k2a	3.95634e-37	-0.902128	0.11	0.297	9.2345e-33
Ccny	3.1549e-12	1.14763	0.37	0.297	7.36386e-08
Ehmt1	6.94465e-07	0.519144	0.215	0.297	0.0162095
Prkd3	4.6496e-06	0.466691	0.214	0.297	0.108526
Kdm1a	8.25965e-05	0.606099	0.223	0.297	1
Rarg	0.000111358	0.26105	0.225	0.297	1
Cds2	6.51949e-44	1.42304	0.474	0.296	1.52171e-39
Mob3a	7.9903e-42	-0.89002	0.096	0.296	1.86501e-37
Cdk14	2.58133e-39	-0.353665	0.099	0.296	6.02508e-35
Ccdc90b	1.67771e-38	-0.575363	0.101	0.296	3.91595e-34
Socs3	1.42012e-28	-0.852025	0.133	0.296	3.3147e-24
Asna1	1.02806e-25	-0.360056	0.137	0.296	2.39959e-21
Tbc1d15	6.04478e-07	0.427417	0.204	0.296	0.0141091
Ap1s2	0.000102731	0.379612	0.218	0.296	1
Jhdm1d	0.000246431	0.491173	0.227	0.296	1
Slc31a2	0.0011725	0.386942	0.227	0.296	1
Ubxn2a	0.087174	0.722876	0.3	0.296	1
Kcnt2	4.08733e-91	-3.29942	0.009	0.295	9.54024e-87
Itfg3	4.51692e-54	-1.17093	0.071	0.295	1.05429e-49
Casp12	8.71141e-51	-1.29916	0.076	0.295	2.03333e-46
1700019E19Rik	1.08954e-33	-0.590102	0.113	0.295	2.5431e-29
Pigk	9.2894e-28	-0.314131	0.127	0.295	2.16824e-23
Epb4.1	1.4194e-20	1.2598	0.41	0.295	3.31302e-16
Sltm	1.13499e-06	0.489485	0.212	0.295	0.0264917
Cyb5b	0.000183438	0.32885	0.233	0.295	1
Epdr1	2.91601e-84	-3.9857	0.02	0.294	6.80626e-80
Vasn	1.03375e-78	-3.3289	0.029	0.294	2.41288e-74
Tep1	6.54406e-56	-1.32224	0.065	0.294	1.52745e-51
Tgfbr1	1.19518e-41	-0.908036	0.097	0.294	2.78967e-37
Phldb1	1.35525e-33	-0.867803	0.118	0.294	3.16328e-29
Rdm1	1.97156e-31	-0.443495	0.113	0.294	4.60182e-27
Nfat5	3.97628e-07	0.392622	0.208	0.294	0.00928103
Mob2	0.281371	0.693294	0.288	0.294	1
Fam49a	2.58824e-68	-1.88974	0.043	0.293	6.0412e-64
Tmx4	2.20545e-51	-1.05103	0.073	0.293	5.14773e-47
Cmas	2.8746e-16	-0.286276	0.17	0.293	6.70961e-12
Rassf1	2.03507e-15	1.18291	0.385	0.293	4.75005e-11
4933433P14Rik	1.15357e-08	0.358354	0.19	0.293	0.000269254
1700123O20Rik	4.0361e-08	0.35344	0.189	0.293	0.000942067
Psmg4	2.14811e-06	0.336165	0.2	0.293	0.0501389
Msrb3	5.85674e-06	0.25268	0.216	0.293	0.136702
Scaf1	1.6759e-05	0.411928	0.213	0.293	0.391172
Znrd1	3.35992e-05	0.339235	0.209	0.293	0.784238
Ccdc82	0.0292664	0.512279	0.245	0.293	1
Fabp4	0	4.35005	0.992	0.292	0
Mrpl53	0.00997179	0.411648	0.23	0.292	1
Fam20c	3.38249e-86	-3.97161	0.015	0.291	7.89507e-82
Lepre1	5.32743e-49	-1.20841	0.078	0.291	1.24347e-44
Tfpi	4.47448e-36	-0.694184	0.108	0.291	1.04439e-31
Rab3d	3.97142e-24	-0.291973	0.137	0.291	9.26968e-20
Cln5	1.3523e-15	0.271546	0.156	0.291	3.1564e-11
Tpra1	6.6926e-07	0.38584	0.201	0.291	0.0156212
Tor3a	0.0549008	0.565703	0.244	0.291	1
1300014I06Rik	0.759868	0.662925	0.275	0.291	1
Ly6c1	0	4.87084	0.974	0.29	0
[truncated: 743 more rows]

## Sheet: Cardiom
	p_val	avg_logFC	pct.1	pct.2	p_val_adj
Ttn	1.19201e-296	6.90227	0.955	0.067	2.78227e-292
Ckmt2	0	6.28813	0.902	0.016	0
Myh6	3.00396e-291	5.94778	0.985	0.076	7.01153e-287
Nppa	2.95489e-70	5.76615	0.752	0.215	6.89702e-66
Tpm1	1.71442e-86	3.30298	1	0.686	4.00162e-82
Slc25a4	1.22981e-84	2.85414	1	0.82	2.87051e-80
Atp5j	1.55513e-70	1.70306	1	0.876	3.62982e-66
Eif1	1.94971e-35	0.635217	1	0.985	4.55082e-31
Rn45s	1.13072e-28	0.566067	1	1	2.63922e-24
Ryr2	0	5.62956	0.812	0.015	0
Mybpc3	0	5.52793	0.895	0.021	0
Cox6a2	7.59545e-283	5.38371	0.977	0.078	1.77285e-278
Atp5g1	7.70061e-86	3.31476	0.992	0.686	1.7974e-81
Cryab	5.29752e-94	2.96576	0.992	0.447	1.23649e-89
Mdh1	2.05403e-83	2.7321	0.992	0.61	4.79431e-79
Cox7b	6.91954e-78	2.40795	0.992	0.618	1.61509e-73
Atp5h	1.66621e-78	2.3206	0.992	0.81	3.88909e-74
Usmg5	4.25828e-73	2.05966	0.992	0.727	9.93926e-69
Atp5b	8.10151e-79	1.86493	0.992	0.924	1.89097e-74
Aldoa	2.70408e-64	1.40886	0.992	0.91	6.31159e-60
Gapdh	5.21534e-63	1.36841	0.992	0.915	1.21731e-58
Fth1	4.2413e-06	0.301263	0.992	0.993	0.0989961
Srl	0	5.30486	0.774	0.009	0
Tnni3	2.39327e-192	5.30046	1	0.151	5.58614e-188
Csrp3	0	5.26333	0.985	0.046	0
Cox5b	2.08085e-72	2.24818	0.985	0.756	4.85691e-68
Uqcr11	8.02707e-68	2.0188	0.985	0.8	1.8736e-63
Atp5e	7.56035e-73	1.92811	0.985	0.799	1.76466e-68
Cox4i1	1.06517e-70	1.82408	0.985	0.941	2.48621e-66
Gpx3	1.95073e-24	0.975877	0.985	0.673	4.55321e-20
Rpl18a	2.80881e-26	-0.710408	0.985	0.987	6.55605e-22
Cst3	2.41394e-19	-0.72636	0.985	0.996	5.63439e-15
Actb	4.69039e-78	-3.06318	0.985	1	1.09478e-73
Fabp3	8.96975e-282	5.17277	0.977	0.078	2.09363e-277
Hhatl	0	5.15714	0.752	0.003	0
Xirp2	0	5.14806	0.767	0.011	0
Nppb	0	5.14774	0.669	0.011	0
Atp2a2	1.02634e-89	4.34518	0.977	0.47	2.39557e-85
Ldhb	2.93166e-90	2.7596	0.977	0.421	6.84278e-86
Cycs	6.11645e-83	2.72642	0.977	0.559	1.42764e-78
Cox5a	6.95836e-80	2.71891	0.977	0.578	1.62415e-75
Cox6c	5.16029e-71	2.10878	0.977	0.878	1.20446e-66
Cox7c	4.81832e-71	2.04248	0.977	0.812	1.12464e-66
Ndufa13	8.32252e-68	1.9198	0.977	0.763	1.94256e-63
Mdh2	3.8338e-66	1.85042	0.977	0.745	8.94848e-62
Ybx1	4.29199e-28	0.853034	0.977	0.935	1.00179e-23
Rpl41	1.07678e-09	-0.438935	0.977	0.987	2.51332e-05
Malat1	5.20218e-42	-1.09794	0.977	0.998	1.21424e-37
Myl7	1.79992e-72	5.119	0.654	0.153	4.20119e-68
Atp5o	2.82893e-77	2.50757	0.97	0.702	6.60302e-73
Ndufa4	5.31321e-69	2.40894	0.97	0.753	1.24016e-64
Ndufv2	5.53302e-68	2.09011	0.97	0.59	1.29146e-63
Uqcrh	2.14636e-67	2.03477	0.97	0.733	5.00983e-63
Cox6b1	1.7595e-67	1.94469	0.97	0.838	4.10684e-63
Uqcrb	1.98453e-63	1.80358	0.97	0.801	4.6321e-59
Hsp90ab1	2.9474e-07	-0.306453	0.97	0.977	0.00687952
Tcap	0	5.06796	0.97	0.036	0
Uqcrq	7.8505e-73	2.37054	0.962	0.658	1.83239e-68
Ndufa11	5.02573e-74	2.26574	0.962	0.574	1.17306e-69
Ndufb9	1.48019e-67	2.14971	0.962	0.68	3.4549e-63
Atp5g3	6.31446e-63	2.11922	0.962	0.648	1.47386e-58
Ndufb10	5.39711e-70	2.08958	0.962	0.702	1.25974e-65
Atp5a1	2.54438e-65	1.91603	0.962	0.847	5.93885e-61
Cox7a2	1.38688e-65	1.88597	0.962	0.753	3.23712e-61
Ndufa2	4.28269e-54	1.51638	0.962	0.736	9.99623e-50
Serf2	1.5389e-15	0.410247	0.962	0.93	3.59195e-11
Rps2	2.11707e-06	0.372187	0.962	0.917	0.0494146
Eef1a1	1.85698e-45	-1.10098	0.962	0.997	4.33439e-41
Itm2b	2.97669e-71	-1.65489	0.962	0.996	6.9479e-67
Actn2	0	5.05025	0.91	0.026	0
Sln	5.14323e-100	5.04847	0.662	0.108	1.20048e-95
Ndufa5	8.37555e-70	2.25406	0.955	0.597	1.95494e-65
Atp5c1	1.4804e-65	1.99101	0.955	0.731	3.45541e-61
Uqcr10	3.61506e-65	1.96718	0.955	0.705	8.43792e-61
Map1lc3a	4.80126e-69	1.95757	0.955	0.573	1.12066e-64
Ndufb7	1.96675e-64	1.86523	0.955	0.709	4.59059e-60
Atp5j2	1.10618e-62	1.81145	0.955	0.813	2.58193e-58
Atp5k	1.79542e-52	1.63361	0.955	0.695	4.1907e-48
Ndufv3	1.11573e-47	1.39517	0.955	0.625	2.60424e-43
Aes	3.96401e-24	0.929936	0.955	0.809	9.2524e-20
Rpl13	9.85476e-28	-0.70564	0.955	0.977	2.3002e-23
Myl1	0	5.04696	0.88	0.028	0
Uqcrfs1	1.92057e-80	2.61405	0.947	0.447	4.48279e-76
S100a1	3.32506e-76	2.31516	0.947	0.425	7.76101e-72
Gbas	8.08999e-64	2.10274	0.947	0.535	1.88828e-59
2010107E04Rik	1.42708e-61	1.99883	0.947	0.615	3.33095e-57
Acaa2	4.48887e-56	1.62532	0.947	0.557	1.04775e-51
Atp5l	3.65329e-57	1.55204	0.947	0.83	8.52713e-53
Atp5d	2.51902e-58	1.45365	0.947	0.729	5.87965e-54
Ndufa3	6.31594e-46	1.37476	0.947	0.766	1.4742e-41
Ndufa6	2.82258e-47	1.33601	0.947	0.739	6.58819e-43
Ndufa7	2.6425e-37	1.1004	0.947	0.747	6.16786e-33
Chchd2	1.21923e-43	1.05236	0.947	0.883	2.8458e-39
Crip2	8.40403e-33	0.831685	0.947	0.837	1.96159e-28
Lars2	3.51923e-10	0.660582	0.947	0.869	8.21424e-06
Rps18	9.89842e-22	-0.717127	0.947	0.954	2.31039e-17
Rps29	2.57013e-34	-1.01866	0.947	0.983	5.99895e-30
Ak1	1.85012e-114	2.82595	0.94	0.231	4.31836e-110
Ndufab1	5.66392e-74	2.52614	0.94	0.49	1.32201e-69
Mrpl42	1.32909e-74	2.26892	0.94	0.436	3.10223e-70
Ndufb8	8.47368e-65	2.2637	0.94	0.64	1.97784e-60
Ndufa10	2.87634e-77	2.24981	0.94	0.412	6.71365e-73
Ndufb5	6.91673e-69	2.20379	0.94	0.511	1.61443e-64
Sdhb	5.29034e-64	2.12971	0.94	0.656	1.23482e-59
Ndufc1	5.07504e-65	2.06359	0.94	0.596	1.18457e-60
Uqcrc1	1.43724e-58	1.94086	0.94	0.661	3.35467e-54
Atp5f1	2.84448e-61	1.91908	0.94	0.714	6.63929e-57
Vdac1	2.63623e-61	1.91585	0.94	0.448	6.15321e-57
Pcp4l1	8.60042e-142	1.749	0.94	0.132	2.00743e-137
Slc25a3	3.87838e-57	1.74682	0.94	0.735	9.05253e-53
Ndufs7	2.50317e-57	1.72763	0.94	0.658	5.84264e-53
Ndufa1	1.47491e-50	1.70012	0.94	0.631	3.44259e-46
Pam	1.4228e-26	1.63146	0.94	0.739	3.32096e-22
Ndufb11	4.72855e-51	1.58376	0.94	0.696	1.10369e-46
Sdhc	6.05149e-54	1.56102	0.94	0.556	1.41248e-49
Fxyd1	8.36669e-50	1.3738	0.94	0.567	1.95287e-45
Dbi	1.19067e-21	0.631105	0.94	0.697	2.77915e-17
Hspb1	2.24067e-16	0.393775	0.94	0.687	5.22995e-12
Rps14	7.629e-14	-0.528287	0.94	0.978	1.78069e-09
Ubb	3.4261e-22	-0.56604	0.94	0.996	7.99686e-18
Rps3	1.18494e-22	-0.674538	0.94	0.948	2.76577e-18
Ftl1	5.85799e-62	-1.94312	0.94	0.989	1.36731e-57
Smpx	0	5.0422	0.977	0.026	0
Ndufb2	5.80251e-62	1.96167	0.932	0.527	1.35436e-57
Gpx4	1.38616e-32	1.00921	0.932	0.816	3.23543e-28
Bsg	3.02414e-32	0.942273	0.932	0.882	7.05865e-28
Pkm2	1.20114e-21	0.831178	0.932	0.792	2.80359e-17
Uba52	9.8842e-18	0.525367	0.932	0.931	2.30707e-13
Rpl4	2.45824e-12	-0.406345	0.932	0.944	5.73778e-08
Rpl37a	2.34003e-28	-0.891245	0.932	0.963	5.46186e-24
Ankrd1	0	5.04071	0.895	0.047	0
Asb11	0	5.02803	0.707	0.001	0
Ccng1	8.73704e-90	2.50352	0.925	0.283	2.03931e-85
Aco2	2.11543e-65	2.32051	0.925	0.459	4.93762e-61
Ndufa12	6.48556e-68	2.23962	0.925	0.487	1.51379e-63
Brp44	3.04512e-65	2.08095	0.925	0.505	7.10761e-61
Ndufs6	1.10276e-52	1.88039	0.925	0.64	2.57396e-48
Ndufa8	2.41582e-56	1.79581	0.925	0.583	5.63877e-52
Ndufb4	1.17638e-48	1.46671	0.925	0.666	2.74579e-44
Minos1	9.01047e-42	1.36334	0.925	0.658	2.10313e-37
Ndufb3	3.23834e-44	1.30997	0.925	0.562	7.55861e-40
Nme2	4.37769e-33	0.985539	0.925	0.775	1.0218e-28
Pink1	3.09277e-19	0.948818	0.925	0.619	7.21884e-15
Slc25a5	2.24174e-20	0.691845	0.925	0.765	5.23245e-16
Ldha	5.68016e-08	0.311778	0.925	0.836	0.00132581
Sod1	0.8361	-0.290164	0.925	0.962	1
Ubc	0.000112375	-0.318152	0.925	0.961	1
Mt1	1.82982e-07	-0.377202	0.925	0.676	0.00427098
Gm1821	4.79568e-35	-0.740282	0.925	0.99	1.11936e-30
Tuba4a	6.07028e-163	3.25906	0.917	0.132	1.41686e-158
Des	7.16855e-177	3.0168	0.917	0.114	1.67321e-172
Ogdh	7.6253e-61	2.47398	0.917	0.525	1.77982e-56
Etfb	2.46584e-61	2.2127	0.917	0.57	5.75551e-57
Cyc1	1.67446e-62	1.99573	0.917	0.516	3.90836e-58
Idh3b	1.72246e-49	1.49271	0.917	0.487	4.02039e-45
Rpl9	5.47656e-12	-0.483601	0.917	0.928	1.27828e-07
Rpsa	7.89473e-13	-0.552028	0.917	0.921	1.84271e-08
Rps19	1.72509e-33	-0.926463	0.917	0.975	4.02654e-29
Cmya5	0	5.02774	0.827	0.015	0
Mybphl	3.62141e-274	5.02428	0.617	0.021	8.45273e-270
Clu	1.38325e-105	3.29727	0.91	0.225	3.22865e-101
Nexn	5.15267e-143	3.22329	0.91	0.159	1.20269e-138
Cisd1	1.7322e-93	2.50606	0.91	0.266	4.04312e-89
Ndufv1	1.02011e-70	2.21741	0.91	0.421	2.38105e-66
Brp44l	1.87374e-61	2.00606	0.91	0.48	4.37351e-57
Ech1	6.88326e-50	1.94848	0.91	0.625	1.60662e-45
Nudt4	4.19673e-52	1.70026	0.91	0.38	9.79558e-48
Sdha	5.7091e-44	1.56878	0.91	0.59	1.33256e-39
Cox17	1.19105e-38	1.28126	0.91	0.598	2.78002e-34
Ndrg2	2.85302e-29	0.873518	0.91	0.534	6.65924e-25
Tceb2	3.26346e-06	0.274309	0.91	0.862	0.0761725
Eef2	0.0955113	-0.279861	0.91	0.88	1
Rps3a	1.19315e-08	-0.348539	0.91	0.93	0.000278493
Rpl23a	1.89178e-08	-0.433493	0.91	0.92	0.000441561
Rpl37	9.06501e-24	-0.689895	0.91	0.951	2.11586e-19
Rpl10	1.22638e-19	-0.776481	0.91	0.912	2.8625e-15
Myl4	1.67335e-93	5.02388	0.662	0.117	3.90577e-89
Hspb7	0	3.93112	0.902	0.042	0
Fndc5	0	3.48558	0.902	0.049	0
Sod2	8.72276e-67	2.26371	0.902	0.419	2.03598e-62
Idh2	9.19302e-70	2.17925	0.902	0.401	2.14574e-65
Pdlim5	1.19139e-65	2.17392	0.902	0.371	2.78083e-61
Pdhb	5.97562e-67	2.05426	0.902	0.393	1.39477e-62
Acadl	4.25247e-65	2.01048	0.902	0.428	9.92569e-61
Uqcrc2	1.16436e-55	1.70421	0.902	0.447	2.71774e-51
Ndufs5	2.84801e-45	1.34084	0.902	0.541	6.64753e-41
Atp5g2	6.21165e-40	1.26157	0.902	0.615	1.44986e-35
Atpif1	7.36862e-27	1.02102	0.902	0.672	1.71991e-22
Hint1	9.84824e-31	0.912019	0.902	0.744	2.29868e-26
Csde1	1.0448e-18	0.901315	0.902	0.741	2.43866e-14
Cox8a	2.66045e-11	0.370171	0.902	0.854	6.20977e-07
Rps6	6.34605e-05	-0.348703	0.902	0.906	1
Rpl23	4.44794e-07	-0.363249	0.902	0.909	0.0103819
Rps11	5.21821e-09	-0.44228	0.902	0.942	0.000121798
Rps25	9.47934e-10	-0.504847	0.902	0.956	2.21257e-05
Rpl14	5.66144e-14	-0.505528	0.902	0.923	1.32144e-09
Rps9	1.50251e-14	-0.562954	0.902	0.953	3.50701e-10
Rplp1	1.2573e-12	-0.563523	0.902	0.948	2.93467e-08
Rpl13a	9.01975e-14	-0.608454	0.902	0.935	2.1053e-09
Arf1	1.26771e-13	-0.756417	0.902	0.893	2.95897e-09
Rpl3	3.32429e-17	-0.797939	0.902	0.901	7.75922e-13
Calm1	7.99216e-35	-1.35542	0.902	0.969	1.86545e-30
Actc1	3.24927e-216	4.98967	0.992	0.123	7.58413e-212
Mb	9.13861e-230	4.986	1	0.114	2.13304e-225
Sgcg	0	4.98251	0.714	0.004	0
Got1	5.29369e-132	3.0628	0.895	0.165	1.2356e-127
Idh3a	5.02492e-90	2.52299	0.895	0.264	1.17287e-85
Ndufb6	3.96904e-52	1.70469	0.895	0.535	9.26415e-48
Chpt1	2.09885e-61	1.6808	0.895	0.303	4.89894e-57
Etfa	2.96441e-48	1.67716	0.895	0.5	6.91923e-44
Ndufs8	4.53013e-52	1.65267	0.895	0.515	1.05738e-47
Ndufs2	6.99168e-52	1.64666	0.895	0.528	1.63193e-47
Ndufc2	1.6785e-41	1.33846	0.895	0.633	3.9178e-37
Hspe1	4.18306e-36	1.20953	0.895	0.531	9.76367e-32
Nudt3	1.92998e-33	1.13947	0.895	0.496	4.50477e-29
Eif4g2	2.6772e-29	1.13379	0.895	0.709	6.24885e-25
Vdac2	6.83073e-26	1.04103	0.895	0.561	1.59436e-21
Scp2	1.23941e-28	0.983643	0.895	0.645	2.89292e-24
Lpl	1.09732e-19	0.735292	0.895	0.714	2.56124e-15
Cnbp	8.44504e-06	-0.304032	0.895	0.915	0.197116
Rpl35	1.35511e-07	-0.310205	0.895	0.936	0.00316297
Rpl32	2.25923e-18	-0.710916	0.895	0.939	5.27327e-14
Rps8	1.64706e-13	-0.732869	0.895	0.922	3.84441e-09
Acadm	7.42944e-70	2.32693	0.887	0.335	1.73411e-65
Idh3g	3.90279e-52	1.83794	0.887	0.488	9.10951e-48
Suclg1	1.07282e-56	1.76802	0.887	0.375	2.50407e-52
Mrpl30	3.03751e-54	1.70366	0.887	0.41	7.08986e-50
Fkbp3	2.38206e-40	1.39623	0.887	0.492	5.55997e-36
Ghitm	1.89825e-30	1.24091	0.887	0.642	4.4307e-26
Prdx2	1.90669e-34	1.13583	0.887	0.609	4.4504e-30
Gpi1	2.44098e-21	0.763604	0.887	0.609	5.69749e-17
Romo1	9.14575e-16	0.548815	0.887	0.691	2.13471e-11
Naca	6.00269e-05	0.440145	0.887	0.802	1
Hnrnpa2b1	0.0296386	-0.353263	0.887	0.896	1
Rps24	1.09345e-07	-0.425616	0.887	0.913	0.00255222
Rps5	1.97815e-16	-0.747764	0.887	0.911	4.6172e-12
Rps28	1.13459e-33	-1.1865	0.887	0.941	2.64825e-29
Tnnc1	4.75143e-303	4.95979	0.992	0.073	1.10903e-298
Hadhb	6.45733e-57	2.21525	0.88	0.486	1.5072e-52
Pdha1	1.41256e-60	2.09989	0.88	0.384	3.29707e-56
Acadvl	2.14876e-57	1.68491	0.88	0.361	5.01542e-53
Pkig	2.73361e-45	1.48091	0.88	0.399	6.38052e-41
Prdx5	4.03621e-39	1.28462	0.88	0.573	9.42093e-35
2310016M24Rik	1.3626e-39	1.22585	0.88	0.509	3.18045e-35
Hcfc1r1	1.95118e-23	0.820604	0.88	0.535	4.55425e-19
Ube2b	4.55321e-16	0.675683	0.88	0.654	1.06277e-11
Psmb6	8.66289e-11	0.463422	0.88	0.725	2.02201e-06
Rabac1	0.0468121	-0.256767	0.88	0.875	1
Gabarap	0.00383509	-0.289442	0.88	0.853	1
Rps27a	1.28078e-06	-0.392271	0.88	0.885	0.0298947
Rpl7	2.20996e-14	-0.572912	0.88	0.933	5.15826e-10
Rps20	4.37311e-18	-0.649384	0.88	0.91	1.02073e-13
Rpl5	1.12469e-11	-0.870544	0.88	0.904	2.62513e-07
Pfn1	4.11454e-21	-0.961329	0.88	0.937	9.60374e-17
Gstm1	4.33856e-17	-1.23352	0.88	0.901	1.01266e-12
Tnnt2	1.85871e-193	4.95499	1	0.148	4.33842e-189
Fhl2	5.30297e-261	3.83553	0.872	0.059	1.23777e-256
Rcan2	2.1378e-251	3.16419	0.872	0.061	4.98983e-247
Acot13	5.4811e-93	2.67787	0.872	0.239	1.27934e-88
Mgst3	1.74214e-83	2.20649	0.872	0.255	4.06633e-79
Cs	8.57737e-63	2.0786	0.872	0.373	2.00204e-58
Timm8b	9.48658e-53	1.74427	0.872	0.347	2.21426e-48
Tpi1	1.12341e-42	1.51224	0.872	0.528	2.62214e-38
Ehd4	9.12431e-60	1.4931	0.872	0.281	2.12971e-55
2900010M23Rik	2.42084e-42	1.34399	0.872	0.456	5.65049e-38
Acat1	4.4761e-34	1.16282	0.872	0.49	1.04477e-29
Cox7a2l	7.50827e-14	0.884287	0.872	0.638	1.7525e-09
Drap1	7.00747e-16	0.655703	0.872	0.623	1.63561e-11
Park7	1.20915e-10	0.420486	0.872	0.687	2.82228e-06
Rpl8	6.2353e-14	-0.516884	0.872	0.889	1.45538e-09
Rps26	2.2793e-09	-0.537806	0.872	0.87	5.32011e-05
Rpl31	2.99291e-12	-0.593361	0.872	0.893	6.98575e-08
Rpl15	6.05748e-10	-0.611014	0.872	0.874	1.41388e-05
Rpl18	2.71445e-13	-0.692696	0.872	0.901	6.3358e-09
Fau	9.93614e-13	-0.702847	0.872	0.917	2.31919e-08
Cd36	9.78745e-10	-0.961882	0.872	0.482	2.28449e-05
Rps23	2.22925e-35	-1.09603	0.872	0.949	5.2033e-31
Cd81	1.84661e-44	-1.2237	0.872	0.98	4.31018e-40
Apoe	2.4207e-30	-3.17671	0.872	0.925	5.65016e-26
Yipf7	0	4.95493	0.662	0.001	0
Pfkm	7.49755e-168	3.37545	0.865	0.108	1.75e-163
Rrad	9.17125e-165	2.98764	0.865	0.105	2.14066e-160
Phyh	5.60247e-73	2.33983	0.865	0.315	1.30767e-68
Coq9	1.15202e-98	2.26353	0.865	0.192	2.68893e-94
Bola3	1.77524e-64	2.00984	0.865	0.325	4.14359e-60
Chchd3	1.13187e-57	1.97827	0.865	0.346	2.6419e-53
Mrpl12	8.43255e-54	1.54079	0.865	0.329	1.96824e-49
Immt	5.47186e-44	1.34367	0.865	0.422	1.27719e-39
Tecr	5.30631e-32	1.19779	0.865	0.584	1.23855e-27
2410015M20Rik	7.85699e-40	1.19021	0.865	0.513	1.8339e-35
Vdac3	1.82631e-28	1.06185	0.865	0.556	4.26279e-24
Mrps21	4.12522e-30	1.04572	0.865	0.553	9.62869e-26
Myeov2	1.9443e-12	0.609382	0.865	0.615	4.53819e-08
Zfp706	1.65209e-11	0.446073	0.865	0.642	3.85614e-07
D8Ertd738e	2.83158e-08	0.341156	0.865	0.701	0.000660918
Rpl27	0.00181429	-0.308176	0.865	0.858	1
Rps7	2.70282e-07	-0.424505	0.865	0.917	0.00630865
Rpl35a	1.69185e-05	-0.425103	0.865	0.872	0.394896
Morf4l1	0.0932329	-0.541003	0.865	0.877	1
Sqstm1	1.93175e-07	-0.563339	0.865	0.842	0.00450889
Rpl38	2.25862e-15	-0.693492	0.865	0.882	5.27185e-11
Ctsb	9.95613e-11	-0.815208	0.865	0.914	2.32386e-06
Calm2	1.04793e-21	-0.849416	0.865	0.925	2.44597e-17
Rpl21	2.37428e-22	-0.881764	0.865	0.937	5.54182e-18
Gnb2l1	7.69779e-12	-0.929727	0.865	0.867	1.79674e-07
Rps4x	2.15365e-19	-0.9531	0.865	0.899	5.02682e-15
Rpl17	5.02034e-20	-0.991563	0.865	0.899	1.1718e-15
Rps21	7.01838e-23	-0.994631	0.865	0.902	1.63816e-18
Cdc42	2.15765e-27	-1.28272	0.865	0.911	5.03616e-23
Psap	4.08274e-38	-1.37459	0.865	0.96	9.52952e-34
Pdia3	6.71459e-42	-1.69001	0.865	0.938	1.56725e-37
Gsn	3.39213e-25	-2.72589	0.865	0.939	7.91756e-21
Myom2	0	4.94596	0.842	0.01	0
Smyd1	0	4.90169	0.782	0.004	0
Dsp	0	4.86045	0.774	0.027	0
Popdc2	0	3.77996	0.857	0.043	0
Pygm	7.47537e-146	2.71023	0.857	0.118	1.74483e-141
Ndufs4	2.76507e-46	1.66382	0.857	0.466	6.45394e-42
Sdhd	2.73227e-45	1.63158	0.857	0.457	6.3774e-41
Ndufs3	8.7642e-48	1.61448	0.857	0.438	2.04565e-43
Got2	9.71979e-51	1.56847	0.857	0.349	2.2687e-46
BC002163	8.65025e-36	1.11104	0.857	0.491	2.01905e-31
Hspa9	4.20774e-26	0.988571	0.857	0.5	9.82128e-22
Reep5	1.29546e-17	0.673565	0.857	0.644	3.02372e-13
Bag1	4.31246e-13	0.613332	0.857	0.555	1.00657e-08
Rbpms	8.42563e-18	0.498814	0.857	0.476	1.96663e-13
C330006A16Rik	0.550669	-0.430098	0.857	0.678	1
Rpl19	4.21572e-14	-0.580682	0.857	0.921	9.83992e-10
Hspa5	6.3245e-07	-0.686028	0.857	0.902	0.014762
H3f3b	6.2865e-58	-2.11049	0.857	0.97	1.46733e-53
Sparc	1.29766e-42	-2.52689	0.857	0.93	3.02886e-38
Trdn	0	4.84534	0.865	0.017	0
Ndufs1	3.65804e-74	2.30182	0.85	0.269	8.53823e-70
Sucla2	9.8313e-56	1.79912	0.85	0.341	2.29472e-51
Cfl2	9.92361e-48	1.61504	0.85	0.374	2.31627e-43
Higd1a	8.58347e-46	1.55933	0.85	0.401	2.00347e-41
1110001J03Rik	2.04257e-45	1.44525	0.85	0.379	4.76755e-41
Txn2	2.94703e-24	1.02152	0.85	0.505	6.87867e-20
Polr2m	2.76619e-13	0.690728	0.85	0.541	6.45656e-09
Pttg1	2.27459e-21	0.654142	0.85	0.504	5.30913e-17
Hist1h2bc	5.223e-14	0.280383	0.85	0.474	1.2191e-09
Rpl29	0.0239743	-0.29821	0.85	0.789	1
Hsp90aa1	0.66562	-0.315547	0.85	0.753	1
Rps17	4.1815e-05	-0.407	0.85	0.901	0.976004
Rpl6	0.000664455	-0.437594	0.85	0.863	1
Rps15	8.3864e-06	-0.504117	0.85	0.88	0.195747
Rps10	2.51475e-09	-0.609052	0.85	0.867	5.86968e-05
Rps16	1.92574e-19	-0.647464	0.85	0.919	4.49486e-15
Rps27	1.64738e-27	-0.859811	0.85	0.941	3.84516e-23
Hsp90b1	2.58278e-18	-1.0037	0.85	0.893	6.02847e-14
Lamp1	1.0653e-26	-1.04508	0.85	0.926	2.48652e-22
Ppia	3.31783e-49	-1.24171	0.85	0.977	7.74415e-45
Calr	7.13697e-20	-1.30325	0.85	0.88	1.66584e-15
Cfl1	8.72203e-44	-1.45975	0.85	0.958	2.03581e-39
Art1	0	4.83998	0.789	0.006	0
Asb2	7.05123e-190	2.68246	0.842	0.079	1.64583e-185
Slc25a11	1.35408e-52	1.81361	0.842	0.357	3.16055e-48
Oxct1	1.22329e-40	1.64094	0.842	0.446	2.85527e-36
Zfp106	1.71453e-40	1.56962	0.842	0.474	4.00189e-36
Mrpl51	9.25684e-46	1.4876	0.842	0.379	2.16064e-41
Anapc13	2.0767e-29	1.01343	0.842	0.459	4.84722e-25
Mif	5.45037e-11	0.430766	0.842	0.633	1.27217e-06
Spop	1.16515e-11	0.415718	0.842	0.541	2.71957e-07
Pomp	0.000165321	0.270642	0.842	0.622	1
Eef1b2	0.0165415	0.268956	0.842	0.663	1
Dstn	0.0114831	-0.276267	0.842	0.746	1
P4hb	1.47478e-08	-0.350744	0.842	0.872	0.000344228
Rpl11	1.09353e-06	-0.46303	0.842	0.871	0.0255241
Rpl7a	3.17457e-05	-0.523975	0.842	0.799	0.740977
Rpl27a	2.45509e-11	-0.574638	0.842	0.888	5.73041e-07
Tuba1b	1.20863e-16	-0.658964	0.842	0.889	2.82106e-12
Lgals1	0.00656223	-0.676003	0.842	0.715	1
Rpl34-ps1	8.87483e-13	-0.688714	0.842	0.854	2.07147e-08
Spnb2	6.2015e-19	-1.22244	0.842	0.892	1.44749e-14
Cd63	2.55762e-10	-1.39059	0.842	0.755	5.96974e-06
Sepp1	1.33145e-39	-1.97167	0.842	0.946	3.10773e-35
Ptrf	1.3771e-31	-2.13505	0.842	0.885	3.21429e-27
Pde4dip	2.3393e-99	2.9423	0.835	0.194	5.46016e-95
Mfn2	1.58694e-108	2.8042	0.835	0.165	3.70408e-104
Vegfb	1.93124e-96	2.41199	0.835	0.183	4.50772e-92
Crat	1.77396e-72	2.04101	0.835	0.224	4.14059e-68
Ndufa9	1.49889e-52	1.80601	0.835	0.414	3.49855e-48
Hadha	3.88066e-40	1.71705	0.835	0.423	9.05786e-36
Deb1	6.70795e-64	1.68091	0.835	0.261	1.5657e-59
Ktn1	1.16919e-38	1.20666	0.835	0.415	2.729e-34
Timm17a	3.74567e-34	1.19509	0.835	0.423	8.74277e-30
Prkaca	7.37034e-30	1.18465	0.835	0.436	1.72031e-25
Dnajc19	7.44215e-31	0.990966	0.835	0.371	1.73707e-26
Mrps24	5.15755e-24	0.797307	0.835	0.478	1.20382e-19
Bri3	3.06794e-13	0.718203	0.835	0.624	7.16089e-09
Tmem160	3.58434e-19	0.671003	0.835	0.474	8.3662e-15
1500032L24Rik	2.42471e-16	0.620986	0.835	0.661	5.65953e-12
Iscu	2.61257e-10	0.417919	0.835	0.538	6.09799e-06
Eif3k	0.534268	-0.257362	0.835	0.67	1
Dazap2	0.451085	-0.381102	0.835	0.745	1
Nedd4	0.00318767	-0.490703	0.835	0.776	1
Selk	7.96468e-09	-0.559427	0.835	0.846	0.000185904
Ncl	2.07039e-07	-0.783019	0.835	0.825	0.00483249
Gpx1	2.80349e-09	-1.18508	0.835	0.804	6.54363e-05
Tmsb4x	1.58526e-63	-2.30884	0.835	0.995	3.70016e-59
Pln	0	4.83924	1	0.069	0
Chchd10	1.48873e-258	4.82205	0.985	0.091	3.47484e-254
Kcnk3	0	3.97492	0.827	0.018	0
Fbxl22	0	3.33044	0.827	0.026	0
Hrc	0	3.18596	0.827	0.016	0
Tmem38a	1.54172e-152	2.9208	0.827	0.103	3.59852e-148
Pdk2	1.85137e-95	2.33929	0.827	0.17	4.32129e-91
Coq7	1.06294e-114	2.24593	0.827	0.133	2.48101e-110
Ppp2r3a	7.84472e-66	2.06512	0.827	0.269	1.83104e-61
Eci1	2.79199e-52	1.74512	0.827	0.297	6.51679e-48
Chchd7	4.3948e-53	1.69774	0.827	0.3	1.02579e-48
Tsc22d4	4.59666e-40	1.60712	0.827	0.36	1.07291e-35
Samm50	1.95486e-36	1.29036	0.827	0.327	4.56284e-32
Tomm5	9.07499e-25	1.06689	0.827	0.407	2.11819e-20
Mrps33	5.20521e-26	0.847437	0.827	0.429	1.21495e-21
Higd2a	1.72491e-20	0.717881	0.827	0.499	4.0261e-16
Atp1a1	4.52699e-20	0.661775	0.827	0.499	1.05665e-15
Ccdc72	1.64828e-09	0.632684	0.827	0.638	3.84724e-05
Cops6	3.31276e-17	0.61962	0.827	0.484	7.7323e-13
Slc25a39	3.43202e-15	0.591856	0.827	0.444	8.01067e-11
Fkbp4	1.62758e-16	0.58598	0.827	0.517	3.79893e-12
Rps13	5.40512e-06	-0.43223	0.827	0.872	0.126161
Mrfap1	1.85678e-06	-0.450301	0.827	0.864	0.0433392
Oat	0.166605	-0.521841	0.827	0.677	1
Ptges3	3.98841e-14	-0.907155	0.827	0.857	9.30934e-10
Fkbp1a	2.15912e-17	-0.984007	0.827	0.867	5.03959e-13
Hmgb1	2.92697e-33	-1.09851	0.827	0.947	6.83185e-29
Ywhaz	2.35404e-33	-1.2865	0.827	0.95	5.49457e-29
Ctsl	1.94886e-21	-1.3242	0.827	0.853	4.54883e-17
Ahnak	2.76184e-29	-1.55903	0.827	0.959	6.44641e-25
Dusp1	3.61351e-23	-1.83065	0.827	0.902	8.43429e-19
Dpysl2	4.32497e-53	-2.32514	0.827	0.948	1.00949e-48
Adck3	2.13513e-192	3.47678	0.82	0.078	4.98361e-188
Nudt8	1.12186e-241	3.1016	0.82	0.055	2.61853e-237
Casq2	1.20587e-274	3.07544	0.82	0.044	2.81462e-270
Trp53inp2	3.61817e-78	2.22049	0.82	0.219	8.44516e-74
Dlat	3.47008e-75	2.08824	0.82	0.224	8.09952e-71
Fh1	6.44755e-59	1.95364	0.82	0.293	1.50492e-54
Gnpat	6.06846e-61	1.88586	0.82	0.249	1.41644e-56
Mrps36	2.60054e-49	1.38894	0.82	0.303	6.06992e-45
0610012G03Rik	9.95521e-33	1.28969	0.82	0.38	2.32365e-28
Sorbs1	1.68312e-35	0.849261	0.82	0.329	3.92858e-31
Pigp	3.40621e-21	0.76508	0.82	0.435	7.95042e-17
Mrpl4	2.08985e-17	0.644038	0.82	0.437	4.87793e-13
Dtnbp1	2.43171e-24	0.600258	0.82	0.349	5.67585e-20
2310003F16Rik	2.6688e-12	0.481648	0.82	0.569	6.22924e-08
Ptov1	8.95146e-08	0.369536	0.82	0.468	0.00208936
Hspd1	1.26754e-09	0.308182	0.82	0.53	2.95856e-05
Txn1	0.0023242	-0.344612	0.82	0.759	1
Npm1	3.09253e-05	-0.403754	0.82	0.789	0.721828
Rpl22	0.100793	-0.507242	0.82	0.747	1
Rbm39	5.42178e-13	-0.685556	0.82	0.881	1.2655e-08
Akr1a1	5.06685e-15	-0.755934	0.82	0.851	1.18265e-10
Ddx5	0.000216042	-0.778323	0.82	0.829	1
Serinc3	0.00416204	-1.00527	0.82	0.868	1
Gnb1	1.10008e-58	-1.97211	0.82	0.977	2.56769e-54
Ldb3	0	4.7883	0.925	0.03	0
Pgam2	0	4.76735	0.962	0.04	0
Fsd2	0	4.71207	0.789	0.005	0
Adprhl1	0	4.70899	0.812	0.016	0
Tmod1	2.23092e-294	3.98116	0.812	0.041	5.20718e-290
Mrps6	4.94373e-77	1.80055	0.812	0.182	1.15392e-72
Art3	1.16202e-75	1.56832	0.812	0.185	2.71228e-71
Prdx3	1.61047e-44	1.53465	0.812	0.317	3.75899e-40
Mrpl18	8.98091e-45	1.43129	0.812	0.323	2.09624e-40
Hadh	5.08811e-36	1.30129	0.812	0.372	1.18762e-31
Phpt1	1.37673e-43	1.27155	0.812	0.298	3.21342e-39
Phb	6.87255e-32	1.06875	0.812	0.443	1.60412e-27
Mrpl33	2.22205e-18	0.748762	0.812	0.556	5.18649e-14
1810046J19Rik	4.48852e-19	0.706557	0.812	0.381	1.04767e-14
Bag3	3.20891e-19	0.703828	0.812	0.446	7.48991e-15
Fam165b	7.1149e-15	0.537038	0.812	0.498	1.66069e-10
Psmd7	0.000345835	0.345724	0.812	0.534	1
Eif4a2	7.83241e-07	0.251077	0.812	0.575	0.0182816
Ccnd2	0.178432	-0.315136	0.812	0.62	1
Cox6a1	5.91329e-09	-0.752284	0.812	0.851	0.000138022
Nfib	4.11172e-07	-0.807719	0.812	0.789	0.00959717
H3f3a	2.16201e-22	-0.985318	0.812	0.875	5.04635e-18
Hnrnpk	2.55352e-19	-1.0383	0.812	0.903	5.96016e-15
2020-09-07	6.4868e-15	-1.06363	0.812	0.844	1.51408e-10
Laptm4a	2.94486e-58	-1.94017	0.812	0.965	6.87361e-54
Ppp1r3a	0	4.65629	0.737	0.004	0
Grb14	3.53912e-186	2.92601	0.805	0.072	8.26065e-182
Apoo	5.23147e-137	2.63161	0.805	0.107	1.22108e-132
Myzap	1.10207e-155	2.4661	0.805	0.09	2.57235e-151
Dmpk	9.78036e-102	1.86719	0.805	0.143	2.28283e-97
Hint2	2.75986e-70	1.83043	0.805	0.227	6.4418e-66
Dld	6.3041e-41	1.43877	0.805	0.318	1.47144e-36
Pgk1	2.29562e-36	1.13205	0.805	0.346	5.3582e-32
Mtch2	1.9411e-22	0.7567	0.805	0.407	4.53071e-18
Fam36a	2.02712e-26	0.657082	0.805	0.418	4.7315e-22
Mff	1.87209e-19	0.652809	0.805	0.422	4.36965e-15
Nenf	1.78836e-05	0.250602	0.805	0.589	0.417421
Tmed2	0.0122304	-0.303143	0.805	0.804	1
Capzb	0.000259537	-0.614011	0.805	0.77	1
Canx	1.42043e-11	-0.679352	0.805	0.889	3.31542e-07
B4galt1	0.0146552	-0.720789	0.805	0.737	1
2020-09-15	1.02493e-30	-1.49817	0.805	0.876	2.3923e-26
2020-09-02	4.95999e-37	-1.53493	0.805	0.931	1.15771e-32
Rhoa	1.33544e-44	-1.68968	0.805	0.97	3.11704e-40
Mfn1	3.25378e-119	2.27295	0.797	0.121	7.59464e-115
Ivns1abp	8.15741e-40	1.5613	0.797	0.343	1.90402e-35
Echs1	1.15817e-47	1.55577	0.797	0.297	2.70327e-43
Unc45b	1.27898e-48	1.28296	0.797	0.23	2.98528e-44
Hibadh	8.88878e-35	1.23872	0.797	0.361	2.07473e-30
Ankrd40	4.30395e-45	1.15202	0.797	0.26	1.00458e-40
Pdrg1	5.48349e-37	0.876517	0.797	0.28	1.2799e-32
Mrps16	5.33572e-27	0.833223	0.797	0.363	1.24541e-22
Ccdc56	2.59928e-11	0.622377	0.797	0.493	6.06697e-07
Pnpla2	2.10741e-27	0.601935	0.797	0.342	4.91889e-23
Ahsa1	1.10716e-08	0.289074	0.797	0.444	0.000258422
Serbp1	0.0210704	-0.338868	0.797	0.776	1
Psmb1	0.102242	-0.364986	0.797	0.737	1
Psma3	0.238224	-0.382724	0.797	0.706	1
Pitpnc1	4.17366e-13	-0.401722	0.797	0.398	9.74174e-09
Rps15a	4.73985e-05	-0.462176	0.797	0.809	1
Anxa6	0.12439	-0.634527	0.797	0.661	1
Itgb1	3.34736e-05	-0.653981	0.797	0.885	0.781307
Tmed10	1.25366e-11	-0.766855	0.797	0.828	2.92617e-07
Rpl10a	2.98906e-08	-0.768517	0.797	0.799	0.000697676
Txnip	2.88501e-19	-1.36365	0.797	0.876	6.7339e-15
Kdelr2	6.14401e-17	-1.38874	0.797	0.843	1.43407e-12
Nfia	2.52331e-17	-1.57498	0.797	0.833	5.88967e-13
Doc2g	0	4.63071	0.895	0.024	0
Cox8b	0	4.59457	0.977	0.053	0
Klhl31	0	4.53326	0.722	0.002	0
C130080G10Rik	0	4.53206	0.812	0.011	0
Ppp1r14c	0	3.60319	0.789	0.013	0
Gpc1	1.52062e-250	3.51815	0.789	0.048	3.54927e-246
Ndrg4	2.85803e-127	2.73319	0.789	0.11	6.67092e-123
Ptgr2	7.03324e-79	2.12443	0.789	0.179	1.64163e-74
Fam174b	2.24798e-168	2.04651	0.789	0.074	5.24701e-164
Mcee	4.22531e-43	1.86811	0.789	0.304	9.8623e-39
Sorbs2	9.56747e-173	1.84137	0.789	0.074	2.23314e-168
Mgrn1	7.39561e-41	1.34595	0.789	0.29	1.72621e-36
Timm23	3.38083e-32	1.31354	0.789	0.412	7.89119e-28
Gyg	1.97225e-59	1.29005	0.789	0.213	4.60342e-55
Dynll2	1.48261e-48	1.27369	0.789	0.258	3.46055e-44
Ube2m	4.24053e-24	1.15435	0.789	0.376	9.89783e-20
B230120H23Rik	4.93374e-36	1.05356	0.789	0.324	1.15158e-31
Eif4ebp1	6.66865e-23	0.864085	0.789	0.39	1.55653e-18
Fundc2	1.78969e-26	0.825964	0.789	0.351	4.17732e-22
Atp6v1d	1.33294e-22	0.802731	0.789	0.35	3.11121e-18
Hdlbp	1.85799e-19	0.793373	0.789	0.484	4.33675e-15
Pdcd5	2.36915e-16	0.741555	0.789	0.521	5.52983e-12
Gja1	1.87641e-27	0.680483	0.789	0.378	4.37974e-23
Fam162a	1.57686e-19	0.624012	0.789	0.419	3.68054e-15
Prdx6	7.61911e-13	0.520381	0.789	0.462	1.77838e-08
Timm13	8.44619e-14	0.483964	0.789	0.487	1.97143e-09
Fxc1	1.47223e-13	0.331609	0.789	0.44	3.43634e-09
Tceb1	2.76882e-10	0.315152	0.789	0.47	6.4627e-06
2700060E02Rik	8.16166e-05	0.299458	0.789	0.548	1
Polr2l	2.48911e-14	0.255084	0.789	0.459	5.80983e-10
Sumo2	3.62112e-07	-0.341741	0.789	0.777	0.00845206
Vapa	0.115455	-0.454968	0.789	0.717	1
Gabarapl2	0.408463	-0.462806	0.789	0.65	1
1110003E01Rik	0.00013625	-0.490024	0.789	0.717	1
Son	0.00583995	-0.562664	0.789	0.871	1
Gdi2	0.000685789	-0.612191	0.789	0.74	1
Rpl39	2.69962e-12	-0.890184	0.789	0.807	6.30117e-08
D4Wsu53e	1.3461e-17	-1.23761	0.789	0.831	3.14194e-13
Arglu1	4.38634e-21	-1.37479	0.789	0.892	1.02381e-16
Rac1	3.89872e-27	-1.38319	0.789	0.901	9.1e-23
Myl6	6.44092e-49	-1.64156	0.789	0.945	1.50337e-44
Gnai2	2.49102e-37	-2.01099	0.789	0.909	5.8143e-33
Cox7a1	5.15481e-221	4.52207	0.992	0.117	1.20318e-216
Stard10	5.57143e-173	3.64411	0.782	0.079	1.30043e-168
Pabpc4	3.94713e-150	3.29217	0.782	0.095	9.21301e-146
Sh3bgr	1.89986e-261	3.0415	0.782	0.042	4.43446e-257
Rbm38	1.08045e-226	2.92298	0.782	0.052	2.52189e-222
Rbm24	0	2.87736	0.782	0.011	0
Hspb2	1.2973e-116	2.80121	0.782	0.129	3.02802e-112
Tcea3	1.9569e-171	2.58759	0.782	0.075	4.5676e-167
Etfdh	2.08344e-71	2.10324	0.782	0.2	4.86296e-67
Fastk	1.28172e-59	1.73193	0.782	0.207	2.99167e-55
Cisd3	9.71362e-76	1.61279	0.782	0.163	2.26726e-71
Golga4	1.1402e-43	1.55255	0.782	0.296	2.66135e-39
Ppp1cb	9.93613e-24	1.16125	0.782	0.529	2.31919e-19
Ifngr2	1.23214e-20	0.995138	0.782	0.431	2.87594e-16
Glrx3	1.3769e-11	0.623082	0.782	0.442	3.21381e-07
Lsmd1	1.2064e-18	0.555414	0.782	0.399	2.81587e-14
Nop10	1.69586e-08	0.517924	0.782	0.527	0.00039583
Mrps14	1.25714e-09	0.359595	0.782	0.471	2.9343e-05
Cdh13	5.50806e-45	0.345375	0.782	0.215	1.28564e-40
Gatad1	0.0293073	-0.395901	0.782	0.599	1
Kif5b	0.346839	-0.484367	0.782	0.68	1
Krtcap2	0.000169018	-0.6156	0.782	0.722	1
Jup	0.185156	-0.956996	0.782	0.712	1
Spcs2	0.000247914	-1.00453	0.782	0.682	1
Lmna	3.69425e-09	-1.41503	0.782	0.771	8.62275e-05
Dhrs3	2.06458e-15	-1.88433	0.782	0.784	4.81894e-11
Mtus2	0	4.50828	0.857	0.025	0
Apobec2	0	4.50074	0.812	0.011	0
Fam195a	1.6912e-198	2.70293	0.774	0.06	3.94743e-194
Camta1	7.01288e-73	1.65415	0.774	0.179	1.63688e-68
Acyp2	2.94662e-69	1.49176	0.774	0.169	6.8777e-65
D10Jhu81e	2.28632e-34	1.47247	0.774	0.258	5.3365e-30
Tmem65	1.76746e-36	1.21094	0.774	0.274	4.12542e-32
Mrpl53	1.08515e-45	1.20067	0.774	0.259	2.53286e-41
Bnip3	2.50157e-33	0.861926	0.774	0.292	5.8389e-29
Isca1	1.55962e-27	0.815793	0.774	0.338	3.64031e-23
Raf1	7.21041e-28	0.675728	0.774	0.309	1.68298e-23
Rnf10	5.0018e-14	0.658371	0.774	0.491	1.16747e-09
Aurkaip1	5.31157e-17	0.63735	0.774	0.401	1.23977e-12
Ccdc124	1.10954e-10	0.587717	0.774	0.431	2.58978e-06
Spag7	1.49162e-14	0.582859	0.774	0.433	3.4816e-10
1810058I24Rik	5.90144e-14	0.552473	0.774	0.425	1.37746e-09
Tcp1	2.79655e-11	0.442035	0.774	0.474	6.52742e-07
Sar1b	2.46116e-16	0.413352	0.774	0.375	5.7446e-12
Cacybp	8.4593e-13	0.396049	0.774	0.417	1.97449e-08
Pnkd	9.81208e-21	0.342399	0.774	0.382	2.29024e-16
Ube2r2	0.000644037	0.274808	0.774	0.529	1
1810037I17Rik	0.135683	-0.255097	0.774	0.591	1
Capza2	0.298609	-0.268581	0.774	0.662	1
Spcs1	0.0724232	-0.310725	0.774	0.709	1
Rer1	0.833239	-0.342464	0.774	0.637	1
Comt	0.802298	-0.357196	0.774	0.68	1
Serinc1	0.756573	-0.38822	0.774	0.696	1
Atox1	0.0968386	-0.480235	0.774	0.711	1
Tax1bp1	0.304813	-0.561444	0.774	0.684	1
Ppp1r2	0.296602	-0.640114	0.774	0.641	1
Hnrnpab	1.63269e-05	-0.678281	0.774	0.748	0.381086
Snrpb	2.22406e-08	-0.761036	0.774	0.766	0.000519117
Sec62	4.37621e-13	-0.788355	0.774	0.812	1.02145e-08
Rpl36a	4.96501e-10	-0.924134	0.774	0.778	1.15888e-05
Ctsa	0.0767671	-0.926488	0.774	0.679	1
Eif4a1	1.54808e-07	-1.08152	0.774	0.754	0.00361337
Set	1.37233e-09	-1.20628	0.774	0.816	3.20315e-05
Tmem59	9.54968e-30	-1.23893	0.774	0.909	2.22899e-25
Tmbim6	1.99347e-27	-1.26552	0.774	0.906	4.65296e-23
Lmod2	0	4.47481	0.85	0.013	0
Dhrs7c	0	3.81631	0.767	0.009	0
Acsl1	6.46051e-139	2.93968	0.767	0.097	1.50795e-134
Hspb8	4.98717e-143	2.67746	0.767	0.088	1.16406e-138
Gmpr	2.21453e-221	2.631	0.767	0.05	5.16894e-217
Macrod1	4.52979e-121	2.23962	0.767	0.105	1.0573e-116
D16H22S680E	1.87932e-83	2.19689	0.767	0.155	4.38651e-79
Atp1b1	7.45933e-96	1.99369	0.767	0.133	1.74108e-91
Grsf1	1.65364e-56	1.5258	0.767	0.207	3.85977e-52
Pmpcb	1.53032e-50	1.31158	0.767	0.217	3.57192e-46
Sh3kbp1	4.82302e-44	1.22794	0.767	0.255	1.12574e-39
Tmem126a	2.32951e-20	0.998986	0.767	0.374	5.4373e-16
BC004004	3.3298e-20	0.862028	0.767	0.402	7.77207e-16
Zcrb1	7.71398e-27	0.778918	0.767	0.359	1.80052e-22
Naa20	2.98066e-16	0.744491	0.767	0.43	6.95716e-12
Asph	9.38462e-22	0.645256	0.767	0.399	2.19046e-17
Lsm4	9.20345e-12	0.593215	0.767	0.424	2.14818e-07
Tmem93	3.92989e-24	0.568714	0.767	0.303	9.17276e-20
Pla2g16	2.37868e-22	0.527799	0.767	0.321	5.55207e-18
Commd1	2.61782e-09	0.444996	0.767	0.476	6.11025e-05
Ube2n	1.36935e-05	0.364214	0.767	0.525	0.319621
Ugp2	1.0437e-08	0.306062	0.767	0.489	0.000243611
Sfr1	0.435347	-0.308224	0.767	0.647	1
Csnk1a1	0.282628	-0.376268	0.767	0.608	1
Eif3c	0.36257	-0.381339	0.767	0.629	1
Rbbp4	0.302745	-0.431494	0.767	0.597	1
Ndfip1	5.09665e-13	-0.513095	0.767	0.793	1.18961e-08
Ociad1	0.243706	-0.524333	0.767	0.656	1
Cdv3	0.887699	-0.695658	0.767	0.632	1
Psme2	0.0024811	-0.828824	0.767	0.678	1
Gsk3b	4.94046e-10	-1.06	0.767	0.804	1.15315e-05
Cyb5	4.49511e-18	-1.16453	0.767	0.802	1.0492e-13
Srsf2	7.65048e-13	-1.25634	0.767	0.8	1.7857e-08
Actr2	1.46147e-21	-1.44155	0.767	0.874	3.41121e-17
B2m	1.97208e-71	-2.70453	0.767	0.992	4.60303e-67
2310046A06Rik	0	4.46558	0.714	0.004	0
Alpk2	0	4.43939	0.692	0.002	0
Ppif	6.84025e-233	3.21959	0.759	0.047	1.59658e-228
Perp	2.25812e-101	1.97227	0.759	0.129	5.27068e-97
Pigy	5.02554e-74	1.77415	0.759	0.155	1.17301e-69
Slc25a12	8.19208e-47	1.5151	0.759	0.264	1.91211e-42
Svil	1.60055e-34	1.35493	0.759	0.341	3.73584e-30
Mrpl55	1.30846e-46	1.34198	0.759	0.243	3.05408e-42
Mrpl41	1.27548e-44	1.27285	0.759	0.232	2.97709e-40
Fxr1	1.32752e-31	1.23492	0.759	0.324	3.09855e-27
1110058L19Rik	1.39752e-43	1.20789	0.759	0.238	3.26195e-39
Pam16	3.58756e-43	1.10807	0.759	0.252	8.37372e-39
Mrpl54	9.78131e-29	0.998873	0.759	0.326	2.28306e-24
Mrpl28	2.59e-30	0.963847	0.759	0.332	6.04531e-26
Isca2	1.56261e-33	0.850218	0.759	0.259	3.64728e-29
Glrx5	9.27902e-29	0.807745	0.759	0.311	2.16582e-24
0610010O12Rik	1.68181e-30	0.804933	0.759	0.262	3.92552e-26
Mrps28	4.80994e-26	0.765308	0.759	0.329	1.12269e-21
Rwdd1	2.86043e-09	0.695631	0.759	0.484	6.67652e-05
Tomm20	6.32802e-12	0.675131	0.759	0.443	1.47702e-07
Flot1	6.25001e-24	0.533739	0.759	0.298	1.45881e-19
Mrpl48	5.12073e-20	0.479018	0.759	0.349	1.19523e-15
Psmd12	3.57914e-11	0.36401	0.759	0.432	8.35408e-07
Tmem85	6.37018e-13	0.357598	0.759	0.374	1.48686e-08
Polr2f	1.71009e-05	0.341987	0.759	0.532	0.399153
Syngr2	4.23664e-10	0.269276	0.759	0.445	9.88875e-06
Eif3a	0.790788	-0.300855	0.759	0.637	1
Taldo1	0.35288	-0.550023	0.759	0.553	1
Lgmn	1.29782e-07	-0.636716	0.759	0.504	0.00302925
Btf3	6.02526e-07	-0.773305	0.759	0.741	0.0140636
Ywhah	2.00858e-06	-1.20789	0.759	0.712	0.0468824
Sdcbp	6.7457e-18	-1.44508	0.759	0.806	1.57451e-13
Rps12	2.0395e-30	-1.70335	0.759	0.861	4.7604e-26
Tapbp	4.63364e-31	-2.28079	0.759	0.858	1.08154e-26
H2-K1	3.33173e-48	-2.54632	0.759	0.942	7.77659e-44
H2-D1	2.29375e-68	-2.71906	0.759	0.991	5.35384e-64
Mylk3	0	4.4349	0.91	0.018	0
Eno3	2.63532e-294	4.40611	0.932	0.062	6.15111e-290
Myocd	0	3.32032	0.752	0.015	0
Coq10a	1.03031e-108	2.03148	0.752	0.109	2.40484e-104
Decr1	8.07459e-55	1.83698	0.752	0.224	1.88469e-50
Pygb	2.58526e-53	1.73556	0.752	0.236	6.03426e-49
Egln1	3.65499e-75	1.6026	0.752	0.164	8.53112e-71
Poldip2	6.46339e-33	1.3861	0.752	0.256	1.50862e-28
Dlst	7.48107e-51	1.35915	0.752	0.225	1.74616e-46
1810013D10Rik	6.23382e-53	1.32877	0.752	0.205	1.45503e-48
Mrpl34	2.14083e-39	1.2807	0.752	0.263	4.99692e-35
Immp1l	5.63246e-30	1.12896	0.752	0.314	1.31467e-25
Hsd17b10	1.10305e-27	1.08872	0.752	0.354	2.57463e-23
Dst	8.48112e-19	1.05824	0.752	0.604	1.97958e-14
Fam54b	8.34507e-20	0.910113	0.752	0.37	1.94782e-15
Gadd45gip1	5.20106e-30	0.828278	0.752	0.294	1.21398e-25
Ghr	1.64308e-16	0.756495	0.752	0.366	3.83511e-12
Grpel1	3.61973e-19	0.741006	0.752	0.397	8.4488e-15
Chchd1	1.65733e-21	0.7285	0.752	0.38	3.86838e-17
Dnaja2	1.7679e-15	0.620482	0.752	0.435	4.12646e-11
Cisd2	1.8563e-16	0.613287	0.752	0.368	4.33278e-12
Glo1	2.26466e-13	0.611787	0.752	0.429	5.28595e-09
Tmem147	2.77667e-14	0.511692	0.752	0.419	6.48102e-10
Vti1b	1.2382e-06	0.453831	0.752	0.516	0.0289007
4933434E20Rik	2.82628e-14	0.436037	0.752	0.408	6.59682e-10
4833439L19Rik	9.92769e-12	0.433833	0.752	0.445	2.31722e-07
Pafah1b1	2.68488e-11	0.391849	0.752	0.512	6.26678e-07
Atp6v1f	0.740041	-0.283266	0.752	0.655	1
Chmp2a	0.36363	-0.3297	0.752	0.668	1
Fermt2	0.0814413	-0.331692	0.752	0.583	1
Psmb4	0.720638	-0.421921	0.752	0.645	1
Tm9sf2	0.199914	-0.454032	0.752	0.734	1
Ap2m1	1.55715e-05	-0.697585	0.752	0.742	0.363454
Hnrnpc	2.92806e-06	-0.883207	0.752	0.761	0.0683437
Srsf3	0.00570579	-0.888024	0.752	0.682	1
Lamp2	2.33848e-07	-0.897388	0.752	0.763	0.00545824
Myadm	4.04414e-13	-1.04957	0.752	0.88	9.43944e-09
Pdia6	2.14198e-14	-1.10932	0.752	0.791	4.9996e-10
Grn	7.14656e-18	-2.25487	0.752	0.8	1.66808e-13
Ckm	0	4.40494	0.947	0.039	0
Clasp1	4.63726e-73	1.80511	0.744	0.163	1.08238e-68
Dnaja4	5.94475e-107	1.61324	0.744	0.107	1.38757e-102
Bzw2	2.18048e-79	1.58103	0.744	0.14	5.08946e-75
Pgm2	3.13681e-72	1.56192	0.744	0.158	7.32162e-68
Alas1	1.00746e-53	1.45808	0.744	0.2	2.35151e-49
Mrps23	2.91279e-56	1.42062	0.744	0.194	6.79874e-52
Ppm1k	7.61055e-60	1.33118	0.744	0.179	1.77638e-55
Trak1	1.98481e-40	1.09495	0.744	0.274	4.63275e-36
Ttc35	2.14211e-30	0.848931	0.744	0.277	4.99989e-26
Ssbp1	1.56392e-32	0.795451	0.744	0.276	3.65034e-28
Mrps12	4.94826e-24	0.692409	0.744	0.311	1.15497e-19
Bckdk	1.04194e-21	0.617677	0.744	0.315	2.43198e-17
Mrpl23	5.92789e-15	0.543264	0.744	0.463	1.38363e-10
Stip1	7.58542e-12	0.48793	0.744	0.395	1.77051e-07
Cnih4	9.94974e-15	0.400692	0.744	0.383	2.32237e-10
9130011J15Rik	5.40387e-05	0.309891	0.744	0.509	1
Kif1b	5.26452e-14	0.306892	0.744	0.424	1.22879e-09
Eif3g	0.149677	-0.28096	0.744	0.547	1
Srpr	0.185737	-0.357699	0.744	0.584	1
Tgm2	8.82519e-08	-0.369725	0.744	0.416	0.00205989
Cltc	0.0346391	-0.382608	0.744	0.671	1
Ncor1	0.649899	-0.392034	0.744	0.635	1
Mtap4	0.0210703	-0.458239	0.744	0.567	1
Tmem109	0.33587	-0.471676	0.744	0.631	1
Sumo1	0.42509	-0.493564	0.744	0.6	1
Rab14	0.0168203	-0.594455	0.744	0.737	1
Mbnl2	0.221636	-0.744322	0.744	0.705	1
Aldh2	1.51981e-15	-1.36588	0.744	0.772	3.5474e-11
Dusp3	9.21744e-11	-1.80748	0.744	0.799	2.15144e-06
Hfe2	0	4.3882	0.827	0.007	0
Ccdc141	0	3.25489	0.737	0.023	0
Acss1	2.61254e-204	3.14906	0.737	0.053	6.09793e-200
Rilpl1	4.68076e-72	2.14149	0.737	0.182	1.09254e-67
Vldlr	1.72328e-91	2.10684	0.737	0.13	4.02231e-87
Alkbh7	2.6867e-64	1.70642	0.737	0.164	6.27102e-60
Dnajc15	1.87694e-56	1.67072	0.737	0.207	4.38096e-52
Endog	7.78468e-73	1.5598	0.737	0.139	1.81702e-68
Sdr39u1	2.96401e-76	1.51592	0.737	0.148	6.91828e-72
Sord	1.27995e-61	1.50534	0.737	0.169	2.98752e-57
Lmo7	2.68402e-101	1.46886	0.737	0.111	6.26476e-97
Mkks	6.32255e-43	1.15138	0.737	0.225	1.47575e-38
Inpp5a	4.8602e-29	0.94579	0.737	0.284	1.13442e-24
2810422J05Rik	3.717e-33	0.744188	0.737	0.25	8.67585e-29
Pfdn1	4.012e-20	0.635062	0.737	0.379	9.36441e-16
1110007C09Rik	1.57817e-17	0.625008	0.737	0.337	3.6836e-13
Commd3	7.39322e-15	0.543842	0.737	0.368	1.72565e-10
0910001L09Rik	4.77415e-13	0.502487	0.737	0.372	1.11434e-08
Churc1	5.34838e-14	0.448586	0.737	0.398	1.24836e-09
Prkag1	1.12535e-13	0.352612	0.737	0.355	2.62668e-09
Gcap14	2.24323e-14	0.324091	0.737	0.405	5.23593e-10
2810428I15Rik	8.53837e-09	0.264082	0.737	0.415	0.000199294
Tcf25	0.181293	-0.25638	0.737	0.624	1
H47	0.000474529	-0.280676	0.737	0.499	1
Cct3	0.0135891	-0.290124	0.737	0.517	1
Hn1	0.0985587	-0.3259	0.737	0.511	1
Rnf187	0.760658	-0.349642	0.737	0.621	1
St13	0.0316686	-0.372933	0.737	0.558	1
Psenen	0.888861	-0.434275	0.737	0.593	1
Txnl4a	0.572129	-0.467194	0.737	0.59	1
Ubl3	0.274676	-0.577727	0.737	0.629	1
Rock1	0.130826	-0.753217	0.737	0.659	1
Klhl9	0.211457	-0.774182	0.737	0.643	1
G3bp1	0.787121	-0.801841	0.737	0.603	1
Xbp1	3.20097e-05	-0.998404	0.737	0.696	0.747139
Csnk2a1	0.000181816	-1.05113	0.737	0.711	1
Hnrnpu	6.38606e-06	-1.19561	0.737	0.715	0.149057
Cd47	3.93797e-20	-1.57957	0.737	0.81	9.19162e-16
Actg1	1.54531e-60	-2.4564	0.737	0.972	3.6069e-56
Fitm1	0	3.99909	0.729	0.005	0
Sgca	0	3.90956	0.729	0.008	0
Clip4	2.05578e-143	2.73865	0.729	0.076	4.79839e-139
Nnt	3.02461e-94	2.66576	0.729	0.133	7.05974e-90
Hk2	4.63018e-65	2.25451	0.729	0.194	1.08073e-60
Fyco1	3.00338e-68	1.77077	0.729	0.175	7.01019e-64
1700021F05Rik	6.55353e-54	1.63222	0.729	0.195	1.52966e-49
Gpcpd1	1.81216e-59	1.51235	0.729	0.191	4.22977e-55
Ndufaf4	3.08894e-53	1.49697	0.729	0.193	7.2099e-49
Fam82b	1.44354e-40	1.33028	0.729	0.232	3.36937e-36
2010107H07Rik	2.37633e-58	1.01734	0.729	0.164	5.54659e-54
Mrpl14	1.14455e-22	0.935425	0.729	0.347	2.6715e-18
Tufm	2.81039e-36	0.884291	0.729	0.234	6.55972e-32
Fdx1	6.87207e-31	0.696871	0.729	0.251	1.60401e-26
Eci2	5.67183e-24	0.648805	0.729	0.307	1.32386e-19
Acot2	3.85784e-21	0.618594	0.729	0.345	9.00458e-17
Acadsb	1.02476e-22	0.517024	0.729	0.313	2.39188e-18
Psmc5	5.98519e-09	0.349087	0.729	0.414	0.0001397
Nfe2l1	4.04045e-12	0.329758	0.729	0.475	9.43081e-08
Macf1	3.77326e-07	0.287173	0.729	0.624	0.00880717
Srsf5	2.59456e-05	-0.288683	0.729	0.729	0.605596
Cetn3	0.139255	-0.317228	0.729	0.529	1
Ier3ip1	0.0744339	-0.32144	0.729	0.578	1
Ssr3	0.803219	-0.337387	0.729	0.649	1
Maf1	0.249158	-0.390156	0.729	0.543	1
Kars	0.0198689	-0.479793	0.729	0.501	1
BC013529	0.62261	-0.498826	0.729	0.556	1
Nptn	0.972327	-0.657556	0.729	0.598	1
Taok1	0.723195	-0.715144	0.729	0.603	1
Pcbp1	4.89378e-08	-0.735632	0.729	0.756	0.00114226
Aplp2	6.1665e-16	-0.815058	0.729	0.871	1.43932e-11
Atp6v0e	4.68015e-06	-0.93991	0.729	0.673	0.109239
Puf60	0.00857482	-0.975317	0.729	0.623	1
Ddost	1.59985e-08	-0.996913	0.729	0.728	0.000373421
Arpc2	7.43769e-15	-1.04426	0.729	0.826	1.73603e-10
Srrm2	2.28068e-09	-1.05635	0.729	0.864	5.32333e-05
Alkbh5	0.00748151	-1.1535	0.729	0.741	1
Ppib	7.61621e-36	-1.83147	0.729	0.848	1.7777e-31
Trf	0.0966438	-3.44525	0.729	0.624	1
Car14	0	4.38476	0.684	0.009	0
Lrrc10	0	4.38167	0.647	0.004	0
Myh7	0	4.36168	0.759	0.006	0
Gsta4	1.47362e-103	2.78993	0.722	0.119	3.43957e-99
Slc2a4	2.38295e-175	2.23195	0.722	0.057	5.56205e-171
Pacsin3	2.51291e-130	2.222	0.722	0.078	5.86537e-126
Parm1	1.73114e-176	2.20592	0.722	0.058	4.04065e-172
Clybl	3.38992e-102	2.09107	0.722	0.111	7.9124e-98
Nceh1	9.29535e-110	1.75201	0.722	0.097	2.16963e-105
Dmd	1.52935e-70	1.69626	0.722	0.161	3.56966e-66
Aifm1	1.57025e-73	1.65511	0.722	0.139	3.66513e-69
Ivd	1.02986e-59	1.51089	0.722	0.18	2.40379e-55
Nudt19	1.92945e-56	1.49086	0.722	0.171	4.50354e-52
C1qbp	7.7739e-22	1.36747	0.722	0.322	1.8145e-17
Ces1d	2.25572e-66	1.21368	0.722	0.147	5.26507e-62
Ppa2	4.08462e-52	1.18446	0.722	0.184	9.5339e-48
Kif1c	2.38556e-43	1.16636	0.722	0.235	5.56813e-39
Mtx2	3.39205e-39	1.01567	0.722	0.221	7.91738e-35
Camk2d	2.31296e-20	0.86855	0.722	0.37	5.39868e-16
Clpp	1.83063e-17	0.81318	0.722	0.318	4.27287e-13
Mrps17	3.00623e-17	0.801764	0.722	0.316	7.01684e-13
Gstk1	8.94729e-32	0.72045	0.722	0.24	2.08839e-27
Rpp21	7.2424e-15	0.624631	0.722	0.337	1.69045e-10
Fech	4.76141e-31	0.616941	0.722	0.274	1.11136e-26
Btbd1	7.87456e-21	0.609053	0.722	0.314	1.838e-16
Rgs2	4.72269e-36	0.581872	0.722	0.237	1.10232e-31
Psmb7	2.06896e-11	0.576173	0.722	0.438	4.82915e-07
1810043H04Rik	2.5436e-20	0.550836	0.722	0.323	5.93701e-16
1500011K16Rik	7.08147e-27	0.477665	0.722	0.262	1.65289e-22
Gtf2a2	3.84523e-07	0.473775	0.722	0.427	0.00897514
Mtus1	5.40455e-20	0.413918	0.722	0.323	1.26148e-15
Polr1d	0.113078	0.313636	0.722	0.502	1
Pja2	2.02473e-17	0.269091	0.722	0.343	4.72593e-13
Arl8b	5.63593e-11	0.258465	0.722	0.407	1.31548e-06
Mat2a	0.603248	-0.429319	0.722	0.626	1
Eif3e	0.215624	-0.437666	0.722	0.534	1
Bnip2	0.931723	-0.495816	0.722	0.57	1
Zbtb20	0.702212	-0.569875	0.722	0.618	1
Rab7	1.35582e-05	-0.621355	0.722	0.703	0.316461
Sf3b1	0.70496	-0.663472	0.722	0.625	1
Jak1	0.0144492	-0.836315	0.722	0.69	1
Lrpap1	0.0462891	-0.859276	0.722	0.613	1
Anp32a	0.000103963	-1.02471	0.722	0.683	1
Tspan7	1.25163e-05	-1.03016	0.722	0.406	0.292142
Zfp36l1	1.0201e-31	-1.06182	0.722	0.918	2.38102e-27
Celf2	0.423751	-1.15695	0.722	0.57	1
Atp1b3	1.95164e-07	-1.38717	0.722	0.706	0.00455531
Ssr1	2.66403e-16	-1.67094	0.722	0.796	6.21811e-12
Tubb5	1.35542e-33	-1.74735	0.722	0.902	3.16368e-29
Itgb1bp2	0	4.35164	0.744	0.005	0
Trim63	0	4.30683	0.722	0.004	0
D830015G02Rik	0	3.76423	0.714	0.004	0
2310061I04Rik	1.64625e-106	1.89927	0.714	0.099	3.84251e-102
Rabgap1l	1.19242e-61	1.78796	0.714	0.165	2.78322e-57
Ubac1	2.26982e-73	1.57641	0.714	0.136	5.29798e-69
Hsdl2	3.61063e-46	1.27735	0.714	0.207	8.42758e-42
Mrpl39	2.81263e-42	1.07862	0.714	0.206	6.56496e-38
Lynx1	1.12745e-43	0.925865	0.714	0.201	2.63158e-39
Ap4s1	6.56289e-33	0.899917	0.714	0.245	1.53184e-28
Slco3a1	1.23105e-32	0.750074	0.714	0.241	2.8734e-28
Ndufaf3	2.91987e-35	0.69335	0.714	0.217	6.81526e-31
Pnpla8	1.20514e-20	0.66263	0.714	0.327	2.81292e-16
1810035L17Rik	6.18614e-12	0.649369	0.714	0.408	1.44391e-07
Msi2	1.64535e-25	0.642325	0.714	0.277	3.8404e-21
Tmem134	4.86426e-15	0.432309	0.714	0.357	1.13537e-10
Cops4	2.63056e-10	0.331194	0.714	0.402	6.13998e-06
1700020I14Rik	4.12939e-16	0.275221	0.714	0.326	9.63841e-12
Plec	0.00279248	-0.278374	0.714	0.516	1
Ube2d2	0.219518	-0.352533	0.714	0.619	1
Dctn2	0.319592	-0.361594	0.714	0.516	1
Trmt112	0.998301	-0.361726	0.714	0.598	1
Psme1	0.923778	-0.386122	0.714	0.625	1
Sec13	0.461635	-0.44001	0.714	0.528	1
Atp6v0c	0.00013784	-0.457208	0.714	0.736	1
Med28	0.00686738	-0.693059	0.714	0.645	1
Eif3f	0.00310877	-0.745695	0.714	0.678	1
Matr3	0.41531	-0.792059	0.714	0.552	1
Prnp	0.232395	-0.851274	0.714	0.51	1
Dctn4	0.0158952	-1.01507	0.714	0.657	1
Mtch1	8.30957e-07	-1.05717	0.714	0.694	0.0193954
Cbx5	0.250269	-1.13372	0.714	0.513	1
Phactr2	0.13535	-1.14115	0.714	0.505	1
Rab11a	0.000764942	-1.27044	0.714	0.647	1
Arf4	1.75797e-14	-1.46005	0.714	0.765	4.10327e-10
Tmem50a	4.36447e-31	-1.64046	0.714	0.858	1.01871e-26
Hspb6	0	4.30351	0.925	0.044	0
Myoz2	0	4.29318	0.955	0.037	0
Syngr1	0	4.25732	0.789	0.024	0
Cpt1b	0	3.94711	0.707	0.003	0
9330158H04Rik	0	3.63808	0.707	0.004	0
Alpk3	0	3.31384	0.707	0.024	0
Cap2	1.01338e-273	2.75823	0.707	0.029	2.36533e-269
Psme4	9.12878e-44	1.7299	0.707	0.252	2.13075e-39
2310061C15Rik	1.32352e-90	1.66994	0.707	0.11	3.08923e-86
2810405K02Rik	6.27069e-54	1.44871	0.707	0.169	1.46364e-49
Dcaf11	2.12429e-35	1.32596	0.707	0.228	4.9583e-31
Nrd1	4.83315e-26	1.22249	0.707	0.323	1.12811e-21
Nt5c3	1.01643e-38	1.11088	0.707	0.211	2.37245e-34
Sspn	1.08747e-30	1.06408	0.707	0.265	2.53825e-26
Huwe1	1.02934e-26	0.959856	0.707	0.32	2.40257e-22
Ubl4	2.9659e-32	0.880578	0.707	0.253	6.92271e-28
Tmem70	5.25543e-34	0.820738	0.707	0.226	1.22667e-29
Ddt	2.91475e-31	0.782663	0.707	0.25	6.80333e-27
Sgcb	2.64604e-15	0.646201	0.707	0.35	6.17611e-11
Smpd1	3.13489e-20	0.593914	0.707	0.31	7.31715e-16
Klhdc2	4.00307e-15	0.549392	0.707	0.329	9.34356e-11
Fam96a	4.72959e-19	0.534627	0.707	0.295	1.10393e-14
Ensa	8.5844e-10	0.477534	0.707	0.404	2.00368e-05
Dag1	1.83654e-14	0.408572	0.707	0.379	4.28668e-10
Bckdha	9.41589e-21	0.39875	0.707	0.282	2.19776e-16
Ufc1	1.36275e-09	0.355034	0.707	0.359	3.1808e-05
Yif1a	1.1861e-09	0.334596	0.707	0.393	2.76848e-05
Copa	0.00714774	-0.256369	0.707	0.546	1
Tmf1	0.363659	-0.289081	0.707	0.673	1
Tsen34	0.198873	-0.315538	0.707	0.496	1
Sf3b2	0.951219	-0.320194	0.707	0.63	1
Ube2l3	0.0651933	-0.345575	0.707	0.551	1
Clasp2	0.962599	-0.410595	0.707	0.69	1
Calm3	0.123056	-0.419727	0.707	0.641	1
Fkbp8	0.664169	-0.431463	0.707	0.558	1
Ccpg1	0.0348084	-0.543696	0.707	0.486	1
Lamb2	0.000478524	-0.558778	0.707	0.486	1
Vps29	0.47044	-0.587275	0.707	0.544	1
Glul	0.321305	-0.609021	0.707	0.666	1
Nhp2l1	0.341912	-0.620703	0.707	0.571	1
Tspyl1	0.0160884	-0.669566	0.707	0.464	1
H2afz	0.056333	-0.821814	0.707	0.617	1
Bnip3l	3.50311e-05	-0.840846	0.707	0.669	0.817661
Jam2	0.0373303	-0.842244	0.707	0.494	1
Rdx	0.0144987	-0.852903	0.707	0.697	1
Morf4l2	0.000713751	-0.915377	0.707	0.677	1
Bcap31	1.08512e-06	-0.966566	0.707	0.69	0.0253278
Rrbp1	4.6532e-12	-1.03131	0.707	0.798	1.0861e-07
Ssb	0.00635156	-1.05736	0.707	0.636	1
6720456B07Rik	8.40252e-05	-1.11373	0.707	0.648	1
Rpn1	0.00289696	-1.24198	0.707	0.689	1
Hnrnpf	3.53526e-12	-1.33528	0.707	0.752	8.25165e-08
Pcnp	4.56284e-12	-1.39866	0.707	0.74	1.06501e-07
Ptma	5.8631e-58	-1.7092	0.707	0.967	1.36851e-53
Tsc22d3	3.51871e-17	-1.74767	0.707	0.77	8.21302e-13
Pxmp2	0	3.06282	0.699	0.021	0
Pdk4	2.00895e-114	2.74106	0.699	0.095	4.6891e-110
Slc20a2	2.27175e-123	2.40886	0.699	0.085	5.30249e-119
Csdc2	7.14993e-145	2.31733	0.699	0.065	1.66886e-140
Ephx2	1.00433e-169	2.18046	0.699	0.056	2.34422e-165
Palld	3.36261e-125	1.93214	0.699	0.078	7.84868e-121
Tead1	1.91913e-53	1.79429	0.699	0.178	4.47945e-49
Dnaja3	5.33758e-26	1.47734	0.699	0.286	1.24584e-21
Apip	7.88889e-63	1.39928	0.699	0.151	1.84135e-58
Dym	2.10567e-41	1.02586	0.699	0.213	4.91484e-37
Josd2	1.81143e-23	0.82127	0.699	0.268	4.22806e-19
Mrpl2	5.90675e-29	0.784175	0.699	0.237	1.37869e-24
1110001A16Rik	3.195e-44	0.769875	0.699	0.187	7.45745e-40
Dnlz	8.67768e-29	0.751442	0.699	0.249	2.02546e-24
Akt2	2.21768e-22	0.614584	0.699	0.298	5.17628e-18
Agpat3	5.86622e-25	0.573833	0.699	0.271	1.36923e-20
Mrps15	8.52319e-22	0.551187	0.699	0.284	1.9894e-17
Ict1	4.35644e-21	0.544325	0.699	0.292	1.01684e-16
Eif4e	1.11219e-12	0.499937	0.699	0.366	2.59596e-08
Tmx2	1.21114e-16	0.40377	0.699	0.311	2.82692e-12
Ube2h	0.0434474	-0.261537	0.699	0.504	1
Ssna1	1.0806e-06	-0.292563	0.699	0.373	0.0252223
Copz2	0.130937	-0.301047	0.699	0.484	1
Psmd11	0.0862038	-0.332662	0.699	0.497	1
Arf5	0.401843	-0.368518	0.699	0.662	1
Ablim1	0.00250638	-0.47445	0.699	0.492	1
Nars	0.0177294	-0.535818	0.699	0.495	1
Arl1	0.423459	-0.549405	0.699	0.545	1
Rab6a	0.176235	-0.61932	0.699	0.623	1
Gaa	0.0399142	-0.628751	0.699	0.493	1
Ranbp1	0.0825401	-0.638036	0.699	0.589	1
2310044H10Rik	0.422769	-0.652206	0.699	0.565	1
Ctnnb1	0.0559705	-0.702627	0.699	0.69	1
Eif4h	0.109937	-0.71429	0.699	0.629	1
9530068E07Rik	0.692126	-0.73418	0.699	0.537	1
Hp1bp3	0.019093	-0.755958	0.699	0.626	1
BC031181	0.859581	-0.771598	0.699	0.513	1
Fhl1	0.318879	-0.866397	0.699	0.557	1
Aph1a	0.0152305	-0.89528	0.699	0.419	1
Tsn	0.0871678	-0.924826	0.699	0.582	1
Rpl22l1	0.00463922	-0.924876	0.699	0.612	1
Tprgl	2.74348e-12	-1.20504	0.699	0.76	6.40356e-08
Gltscr2	0.000720671	-1.21978	0.699	0.71	1
Atp6ap1	6.45105e-13	-1.52089	0.699	0.742	1.50574e-08
Fhod3	0	4.25725	0.677	0.009	0
D830005E20Rik	0	3.79985	0.692	0.002	0
Dgat2	2.05421e-275	3.79123	0.692	0.029	4.79473e-271
Prkaa2	2.07944e-265	3.39008	0.692	0.03	4.85362e-261
Hopx	1.04417e-212	2.33809	0.692	0.04	2.4372e-208
Ppp1r3c	5.69469e-138	2.1973	0.692	0.069	1.3292e-133
Lpin1	2.7742e-103	1.9266	0.692	0.097	6.47526e-99
Fam134b	5.54855e-102	1.90304	0.692	0.101	1.29509e-97
Pdhx	9.78076e-106	1.89903	0.692	0.092	2.28293e-101
Adssl1	2.41763e-164	1.87147	0.692	0.056	5.64298e-160
Hint3	4.07994e-81	1.83041	0.692	0.121	9.52298e-77
Mccc1	1.90603e-81	1.48946	0.692	0.117	4.44887e-77
Arl2	6.03617e-37	1.08729	0.692	0.216	1.4089e-32
Hipk3	4.73546e-29	0.893084	0.692	0.29	1.1053e-24
Slmap	4.48863e-25	0.864468	0.692	0.28	1.04769e-20
Adk	2.28279e-25	0.849882	0.692	0.266	5.32826e-21
Dap3	9.58991e-23	0.720822	0.692	0.277	2.23838e-18
Guk1	1.06988e-17	0.487602	0.692	0.31	2.49721e-13
Nek7	8.0675e-15	0.451676	0.692	0.353	1.88304e-10
Diablo	8.1795e-15	0.450703	0.692	0.302	1.90918e-10
Slc38a2	8.24443e-16	0.409515	0.692	0.377	1.92433e-11
BC003266	1.46764e-24	0.400123	0.692	0.236	3.42561e-20
1110005A03Rik	1.03995e-25	0.394769	0.692	0.239	2.42734e-21
Mrpl13	1.33907e-14	0.371257	0.692	0.319	3.12553e-10
Clip1	4.80381e-15	0.335248	0.692	0.335	1.12126e-10
2610101N10Rik	0.000325652	-0.30373	0.692	0.468	1
Rab10	0.0493411	-0.31563	0.692	0.534	1
Gtf2h5	0.000814398	-0.354976	0.692	0.433	1
Igf2r	2.60884e-06	-0.397097	0.692	0.461	0.0608931
Dnajc8	0.298498	-0.466701	0.692	0.568	1
Tcf7l2	0.318889	-0.526189	0.692	0.522	1
Htra1	0.00509561	-0.529307	0.692	0.43	1
Rnf13	0.00273419	-0.543271	0.692	0.452	1
Atxn10	0.204744	-0.550621	0.692	0.504	1
Nme1	0.271804	-0.625258	0.692	0.486	1
Tmem30a	0.548074	-0.663086	0.692	0.555	1
Mll2	0.369929	-0.800179	0.692	0.681	1
Foxn3	0.178836	-0.830918	0.692	0.517	1
Selm	8.68058e-16	-1.11251	0.692	0.767	2.02614e-11
Gas5	1.54285e-09	-1.18002	0.692	0.711	3.60118e-05
Pttg1ip	1.37534e-06	-1.38338	0.692	0.682	0.0321019
Cd151	2.55237e-07	-1.46191	0.692	0.664	0.00595748
Serpinh1	8.66366e-19	-1.62604	0.692	0.804	2.02219e-14
Nrap	0	4.24414	0.707	0.006	0
Obscn	0	4.24237	0.872	0.029	0
Nrtn	0	3.99649	0.684	0.009	0
Ppargc1a	0	3.24789	0.684	0.013	0
Fgf1	2.24343e-303	2.59095	0.684	0.023	5.2364e-299
Acad11	2.89619e-138	2.18785	0.684	0.069	6.75999e-134
Rangrf	1.49641e-105	2.15727	0.684	0.088	3.49277e-101
Slc8a1	3.65379e-70	1.94599	0.684	0.15	8.52832e-66
Rtn2	2.19773e-89	1.65347	0.684	0.101	5.12972e-85
Stk39	1.22774e-77	1.42749	0.684	0.118	2.86568e-73
Arfgef1	5.0294e-48	1.32593	0.684	0.194	1.17391e-43
2810004N23Rik	8.97369e-57	1.21474	0.684	0.157	2.09455e-52
B230118H07Rik	2.14684e-55	1.156	0.684	0.152	5.01094e-51
Ppa1	6.66064e-33	0.813206	0.684	0.217	1.55466e-28
Faf1	1.56891e-37	0.721539	0.684	0.2	3.66199e-33
Dnm1l	2.68672e-24	0.625446	0.684	0.308	6.27108e-20
Usp9x	2.00189e-15	0.575768	0.684	0.398	4.67261e-11
Trappc6b	2.00092e-05	0.507986	0.684	0.397	0.467035
Tmem223	5.92474e-16	0.368827	0.684	0.331	1.38289e-11
2610507B11Rik	4.87642e-21	0.361953	0.684	0.281	1.1382e-16
Mrps7	3.22076e-16	0.290645	0.684	0.302	7.51758e-12
Ak3	3.74093e-05	0.259236	0.684	0.416	0.87317
Tmem205	5.85762e-11	0.255652	0.684	0.36	1.36723e-06
Sgta	0.000107582	-0.286322	0.684	0.41	1
Cwc15	0.0241378	-0.31707	0.684	0.486	1
Sarnp	0.203244	-0.320629	0.684	0.547	1
Lsm7	0.0291297	-0.329994	0.684	0.469	1
Yif1b	0.0163173	-0.350614	0.684	0.454	1
Ubap2l	0.00136861	-0.351556	0.684	0.485	1
Mprip	0.806256	-0.372301	0.684	0.573	1
Txndc17	0.550607	-0.40758	0.684	0.578	1
Tmem111	0.0129947	-0.423406	0.684	0.447	1
Dhrs7	0.803516	-0.448762	0.684	0.543	1
Itfg1	1.50828e-05	-0.462969	0.684	0.405	0.352047
Psma5	0.826741	-0.471549	0.684	0.539	1
Zfr	0.000614992	-0.550198	0.684	0.443	1
Papola	0.196288	-0.642942	0.684	0.523	1
Akt1	0.00513146	-0.6589	0.684	0.436	1
Atrx	0.202786	-0.690268	0.684	0.533	1
Top1	0.45443	-0.793432	0.684	0.523	1
Copz1	0.400957	-0.79568	0.684	0.494	1
Rab18	0.0280548	-0.854876	0.684	0.607	1
Prrc2c	8.72269e-08	-0.877461	0.684	0.808	0.00203596
Tpd52l2	0.985471	-0.928893	0.684	0.512	1
Tor1aip1	0.062887	-0.95585	0.684	0.587	1
Mapre1	0.152614	-1.03562	0.684	0.589	1
Snrpg	6.54555e-12	-1.12605	0.684	0.726	1.5278e-07
Ckb	0.00278809	-1.31076	0.684	0.603	1
Zfp187	2.1575e-12	-1.32264	0.684	0.763	5.03581e-08
Rtn3	6.10134e-05	-1.39084	0.684	0.656	1
Klf9	4.3151e-18	-1.48572	0.684	0.773	1.00719e-13
Ank1	0	4.22156	0.857	0.012	0
Tuba8	0	4.20793	0.722	0.009	0
Chrm2	0	4.20016	0.639	0.002	0
Lrrc39	9.80478e-245	4.18689	0.707	0.037	2.28853e-240
Kcng2	0	3.42154	0.677	0.016	0
Akap6	0	2.83646	0.677	0.018	0
Cdh2	1.39566e-154	2.5591	0.677	0.061	3.25762e-150
Flnc	3.24129e-97	1.90974	0.677	0.099	7.5655e-93
Cpt2	8.84297e-67	1.69751	0.677	0.139	2.06404e-62
Acox1	1.29584e-53	1.32291	0.677	0.175	3.02461e-49
Fbxo32	1.16723e-71	1.27855	0.677	0.125	2.72442e-67
Aldh6a1	1.56716e-40	1.14557	0.677	0.213	3.65791e-36
1810030N24Rik	1.72887e-64	1.12623	0.677	0.136	4.03534e-60
Pptc7	2.76142e-32	1.10898	0.677	0.243	6.44542e-28
Rdh14	7.20924e-40	0.946827	0.677	0.185	1.68271e-35
Slmo2	4.44999e-30	0.888666	0.677	0.217	1.03867e-25
1810020D17Rik	1.37844e-29	0.887377	0.677	0.233	3.21742e-25
Mrpl15	2.30741e-25	0.856743	0.677	0.269	5.38572e-21
Sepx1	6.27922e-49	0.838857	0.677	0.185	1.46563e-44
Calcoco1	4.42575e-18	0.797634	0.677	0.314	1.03301e-13
AI316807	4.3087e-25	0.652288	0.677	0.258	1.00569e-20
Arpc5l	1.28851e-18	0.569091	0.677	0.296	3.00751e-14
Ak2	6.23877e-24	0.486385	0.677	0.259	1.45619e-19
Pacsin2	3.5373e-12	0.420588	0.677	0.354	8.25642e-08
Sec22b	0.00449382	0.362907	0.677	0.471	1
Mrps18c	4.20373e-10	0.344297	0.677	0.351	9.81193e-06
Trappc2l	3.04517e-13	0.288266	0.677	0.323	7.10773e-09
Urod	5.70148e-20	0.260307	0.677	0.259	1.33078e-15
Polr2e	0.0654641	-0.381652	0.677	0.481	1
Ninj1	4.14633e-15	-0.40799	0.677	0.278	9.67796e-11
Birc6	0.642996	-0.43245	0.677	0.649	1
Fry	2.19228e-19	-0.454391	0.677	0.257	5.117e-15
Tbca	0.379557	-0.466146	0.677	0.535	1
Sumo3	0.576951	-0.574824	0.677	0.539	1
Otub1	0.543339	-0.586651	0.677	0.538	1
Vamp8	0.768787	-0.621499	0.677	0.512	1
Nucks1	0.0894672	-0.631711	0.677	0.552	1
Lman1	0.835903	-0.663111	0.677	0.525	1
Rbm8a	0.708785	-0.820431	0.677	0.538	1
Wdr1	0.406451	-0.858872	0.677	0.634	1
Tln1	0.00082267	-0.891667	0.677	0.669	1
S100a13	6.48702e-06	-0.973075	0.677	0.66	0.151414
0610007C21Rik	0.000167217	-0.983949	0.677	0.639	1
Ostc	0.000652769	-1.01287	0.677	0.604	1
Cyb5r3	1.7782e-05	-1.10606	0.677	0.653	0.415049
Ypel3	5.07466e-10	-1.22691	0.677	0.713	1.18448e-05
Il11ra1	0.00692873	-1.31907	0.677	0.564	1
Dnaja1	1.29172e-09	-1.46749	0.677	0.755	3.01501e-05
Cdkn1a	2.53697e-06	-1.57625	0.677	0.665	0.0592154
Rpn2	6.13098e-16	-1.58614	0.677	0.766	1.43103e-11
Tspo	7.81285e-21	-1.7383	0.677	0.772	1.8236e-16
Corin	0	4.13631	0.684	0.009	0
Tbc1d4	4.20605e-109	2.27755	0.669	0.085	9.81734e-105
Agl	8.63381e-113	2.14955	0.669	0.085	2.01522e-108
Fem1a	6.82856e-79	1.95245	0.669	0.114	1.59385e-74
Osgepl1	7.70924e-134	1.87161	0.669	0.066	1.79941e-129
Fbxw7	1.10941e-78	1.74149	0.669	0.119	2.58948e-74
AI314180	1.0616e-53	1.64432	0.669	0.174	2.47788e-49
Pcdh7	1.1641e-75	1.4542	0.669	0.117	2.71713e-71
4933403F05Rik	3.86769e-48	1.4523	0.669	0.19	9.02758e-44
Apbb1	1.6572e-66	1.39637	0.669	0.129	3.86807e-62
Uqcc	8.03033e-75	1.32252	0.669	0.116	1.87436e-70
Mrps35	2.54145e-72	1.26907	0.669	0.12	5.93199e-68
Ank2	2.12648e-45	1.16658	0.669	0.191	4.96342e-41
Slc30a9	1.32024e-32	0.745613	0.669	0.229	3.08156e-28
Mrps34	3.73616e-29	0.736774	0.669	0.219	8.72056e-25
Spint2	8.68871e-66	0.728512	0.669	0.135	2.02803e-61
Ddx1	2.29311e-12	0.716211	0.669	0.355	5.35236e-08
Btf3l4	1.34675e-19	0.707148	0.669	0.269	3.14345e-15
Tmx4	1.04804e-31	0.701732	0.669	0.22	2.44623e-27
Mrps25	1.20977e-35	0.591726	0.669	0.191	2.82372e-31
Limch1	2.68006e-39	0.555519	0.669	0.185	6.25552e-35
Ubxn2a	2.71363e-19	0.546627	0.669	0.285	6.33389e-15
Mrpl32	1.96828e-23	0.426394	0.669	0.235	4.59416e-19
Med29	4.70479e-20	0.371552	0.669	0.262	1.09814e-15
Mrps18a	9.25816e-14	0.363111	0.669	0.328	2.16095e-09
Pex19	3.42374e-14	0.345834	0.669	0.34	7.99135e-10
Jtb	1.18393e-11	0.276093	0.669	0.323	2.76342e-07
Qdpr	1.51513e-05	-0.256917	0.669	0.406	0.353646
Rala	0.00165146	-0.286117	0.669	0.432	1
Map2k2	0.00160371	-0.335822	0.669	0.425	1
Cdk2ap1	0.020317	-0.391227	0.669	0.438	1
Supt4h1	0.0109816	-0.439499	0.669	0.422	1
2900053A13Rik	3.97529e-06	-0.448725	0.669	0.38	0.0927873
H2afj	0.000570452	-0.482141	0.669	0.427	1
Camk1	0.414415	-0.502691	0.669	0.487	1
Clptm1	0.0639093	-0.553357	0.669	0.474	1
Rrp1	0.61935	-0.65211	0.669	0.542	1
Cdk2ap2	0.448746	-0.679352	0.669	0.475	1
Tra2b	0.229793	-0.746275	0.669	0.602	1
Arhgef12	0.0511155	-0.781983	0.669	0.521	1
Add1	0.00506775	-0.806548	0.669	0.681	1
Snrpf	0.331227	-0.809439	0.669	0.522	1
Tspan31	0.263436	-0.872581	0.669	0.544	1
Gna11	0.260368	-0.949836	0.669	0.565	1
Tmed3	0.00620127	-1.04536	0.669	0.586	1
Ywhab	5.83284e-15	-1.43762	0.669	0.806	1.36144e-10
Lrrc58	1.28456e-14	-1.45313	0.669	0.902	2.99828e-10
Gas6	6.75154e-11	-1.50011	0.669	0.731	1.57588e-06
Mgst1	0.00031791	-1.61853	0.669	0.582	1
Slc29a1	1.51512e-09	-1.78554	0.669	0.658	3.53644e-05
Sdpr	0.0141943	-1.89184	0.669	0.587	1
Slc39a1	1.46354e-20	-1.99061	0.669	0.849	3.41605e-16
Hexb	5.63376e-10	-2.1783	0.669	0.761	1.31498e-05
Mlf1	0	4.13574	0.805	0.023	0
Tnni3k	0	4.13397	0.609	0.002	0
Myo18b	0	4.08413	0.677	0.004	0
Rbm20	0	3.20788	0.662	0.01	0
Usp13	1.83991e-266	3.15166	0.662	0.026	4.29454e-262
Mtfp1	6.24359e-245	2.62732	0.662	0.029	1.45732e-240
Me1	4.54522e-66	1.49823	0.662	0.13	1.0609e-61
Asnsd1	2.67109e-46	1.46601	0.662	0.179	6.2346e-42
Msrb2	2.29595e-62	1.11273	0.662	0.128	5.35897e-58
Suclg2	6.1184e-45	0.954129	0.662	0.174	1.4281e-40
Cdc34	1.16903e-29	0.934328	0.662	0.231	2.72864e-25
Usp2	2.57977e-48	0.917111	0.662	0.168	6.02145e-44
Lpgat1	4.4532e-28	0.906543	0.662	0.234	1.03942e-23
Stard7	4.49317e-36	0.835291	0.662	0.205	1.04875e-31
Pde4d	9.30298e-60	0.806413	0.662	0.138	2.17141e-55
Nfs1	1.11577e-43	0.74618	0.662	0.166	2.60431e-39
Mrpl21	3.63254e-29	0.673793	0.662	0.223	8.47872e-25
Ywhag	7.7575e-19	0.642179	0.662	0.328	1.81068e-14
H2-Ke6	7.63725e-30	0.536492	0.662	0.212	1.78261e-25
Ubr5	7.05454e-21	0.530822	0.662	0.282	1.6466e-16
Aimp1	8.50718e-19	0.516737	0.662	0.323	1.98566e-14
Mut	1.20116e-26	0.511807	0.662	0.242	2.80362e-22
Ube3a	1.15044e-05	0.49321	0.662	0.408	0.268525
Mrpl36	7.50733e-11	0.472258	0.662	0.326	1.75229e-06
Bag6	4.30128e-27	0.441835	0.662	0.25	1.00396e-22
Ubl7	5.4151e-13	0.390036	0.662	0.317	1.26394e-08
Rab28	6.55731e-09	0.345651	0.662	0.344	0.000153054
Ppid	9.6025e-11	0.28672	0.662	0.315	2.24132e-06
Tm2d1	3.42203e-05	-0.302655	0.662	0.389	0.798736
Rsl1d1	3.4724e-06	-0.360924	0.662	0.376	0.0810492
Prrc2b	8.76852e-09	-0.385565	0.662	0.373	0.000204666
Cuedc2	5.50398e-05	-0.392935	0.662	0.369	1
Ccdc47	0.00261514	-0.421248	0.662	0.448	1
0610009D07Rik	0.0890349	-0.449609	0.662	0.456	1
Eprs	0.0147212	-0.457829	0.662	0.463	1
Ddrgk1	0.0174545	-0.459091	0.662	0.453	1
Pgam1	0.694368	-0.546373	0.662	0.476	1
Ppp2r5c	0.0183898	-0.547359	0.662	0.491	1
Eif3b	0.00129718	-0.579344	0.662	0.425	1
Pbrm1	0.430624	-0.583061	0.662	0.505	1
Plin3	0.426207	-0.5931	0.662	0.549	1
Smc6	0.0336738	-0.600678	0.662	0.461	1
2900064A13Rik	0.566154	-0.749453	0.662	0.543	1
Irf2bp2	0.924199	-0.793711	0.662	0.568	1
Clta	0.000146757	-1.03962	0.662	0.62	1
Fkbp9	0.0848358	-1.05111	0.662	0.57	1
Pnrc1	4.51048e-08	-1.20339	0.662	0.681	0.00105279
Sdf4	2.34086e-12	-1.37473	0.662	0.715	5.4638e-08
Gm2a	2.34518e-10	-1.9871	0.662	0.694	5.47389e-06
Fbln1	5.25207e-05	-2.22231	0.662	0.619	1
Frmd5	0	4.0709	0.677	0.005	0
2310042D19Rik	0	3.75092	0.654	0.01	0
Kbtbd10	0	3.62108	0.654	0.004	0
4930513N10Rik	0	3.04026	0.654	0.008	0
Fam40b	0	3.02156	0.654	0.014	0
2610528E23Rik	4.32465e-94	2.16215	0.654	0.095	1.00942e-89
1810014F10Rik	1.09034e-107	1.86432	0.654	0.081	2.54497e-103
Gpsm1	2.49229e-72	1.75189	0.654	0.118	5.81726e-68
Ppip5k2	1.27788e-96	1.57532	0.654	0.089	2.9827e-92
Fxn	2.68726e-86	1.38214	0.654	0.096	6.27234e-82
Antxr2	6.90543e-34	1.26783	0.654	0.221	1.6118e-29
Azi2	2.24362e-14	1.20268	0.654	0.317	5.23684e-10
Akr1b10	3.46949e-64	0.954741	0.654	0.124	8.09814e-60
0610009O20Rik	2.27443e-35	0.869365	0.654	0.202	5.30874e-31
Mrpl45	1.41724e-45	0.861214	0.654	0.165	3.30797e-41
Dgcr6	9.00063e-34	0.840377	0.654	0.19	2.10084e-29
Amz2	4.43781e-29	0.793303	0.654	0.22	1.03583e-24
Mrpl11	2.39077e-29	0.752674	0.654	0.213	5.5803e-25
Slc25a46	5.3188e-29	0.610684	0.654	0.227	1.24146e-24
Rab3a	7.42443e-35	0.600802	0.654	0.181	1.73294e-30
Timm44	4.57023e-34	0.533328	0.654	0.21	1.06674e-29
Wsb2	2.30903e-10	0.50899	0.654	0.336	5.3895e-06
Lsm3	3.81199e-17	0.392805	0.654	0.284	8.89755e-13
Glrx2	3.39808e-29	0.391556	0.654	0.215	7.93147e-25
Mrp63	1.14812e-11	0.285541	0.654	0.315	2.67983e-07
Hist1h1c	9.9144e-09	-0.286581	0.654	0.356	0.000231412
Nrbp1	0.000221635	-0.322572	0.654	0.406	1
Tomm22	0.0255616	-0.353661	0.654	0.44	1
Sys1	0.000149051	-0.407005	0.654	0.379	1
Synj2bp	0.000220727	-0.435036	0.654	0.412	1
Stat3	0.0590694	-0.453217	0.654	0.51	1
Srsf6	0.000138415	-0.465807	0.654	0.403	1
D0H4S114	0.00523838	-0.472242	0.654	0.424	1
Dram2	0.000255996	-0.480584	0.654	0.407	1
C1d	0.0650169	-0.505232	0.654	0.424	1
Ralbp1	0.0327395	-0.609536	0.654	0.614	1
Eif3l	0.0708033	-0.610644	0.654	0.461	1
Clcn4-2	0.00063069	-0.623324	0.654	0.418	1
Aamp	0.276733	-0.67985	0.654	0.58	1
Rbm25	0.0583131	-0.716802	0.654	0.475	1
Tm2d2	0.112103	-0.790569	0.654	0.551	1
Tram1	6.45818e-10	-1.15133	0.654	0.732	1.5074e-05
Degs1	4.60686e-06	-1.23434	0.654	0.644	0.107529
Npc2	2.463e-12	-1.43839	0.654	0.719	5.74889e-08
Fcgrt	8.74525e-19	-1.70075	0.654	0.758	2.04123e-14
Ogn	0.436899	-2.04407	0.654	0.489	1
Myom1	0	4.07024	0.789	0.03	0
Kcnj11	0	3.85564	0.647	0.003	0
Slc4a3	8.07884e-182	3.21578	0.647	0.045	1.88568e-177
Efcab2	1.26615e-195	2.51435	0.647	0.038	2.95531e-191
Usp28	1.04597e-165	2.4506	0.647	0.049	2.44139e-161
Fitm2	4.26755e-202	2.30222	0.647	0.036	9.96088e-198
Pkia	1.657e-58	1.75731	0.647	0.141	3.8676e-54
Entpd5	2.69991e-85	1.70836	0.647	0.099	6.30186e-81
2210408F21Rik	4.77535e-106	1.36051	0.647	0.078	1.11461e-101
Coq5	2.70735e-48	1.26251	0.647	0.157	6.31923e-44
Mrpl35	8.51091e-26	1.23754	0.647	0.232	1.98653e-21
Mast2	2.07144e-57	1.22974	0.647	0.144	4.83495e-53
Fblim1	5.11501e-32	1.0632	0.647	0.218	1.19389e-27
Coq2	1.78825e-22	0.790394	0.647	0.237	4.17394e-18
Prkrir	8.21103e-31	0.789863	0.647	0.216	1.91654e-26
Cdc37l1	5.79625e-35	0.786666	0.647	0.201	1.3529e-30
Adi1	1.60191e-30	0.769239	0.647	0.199	3.73901e-26
Pla2g12a	4.74146e-38	0.561288	0.647	0.169	1.1067e-33
5430417L22Rik	6.61366e-31	0.48908	0.647	0.198	1.54369e-26
6330409N04Rik	8.39823e-42	0.485661	0.647	0.167	1.96023e-37
Aktip	3.90636e-18	0.450966	0.647	0.281	9.11783e-14
Ndufaf2	7.74637e-32	0.423642	0.647	0.191	1.80808e-27
Zc3h14	1.62772e-14	0.331275	0.647	0.3	3.79927e-10
Stoml2	4.5164e-13	0.323057	0.647	0.284	1.05417e-08
Zmat5	1.85353e-11	-0.275392	0.647	0.277	4.32632e-07
Ppdpf	0.375798	-0.437171	0.647	0.463	1
Sf3b5	0.193563	-0.43839	0.647	0.469	1
Fam195b	0.896702	-0.464724	0.647	0.496	1
Dnajb6	0.860754	-0.478008	0.647	0.534	1
Tbcb	0.0673182	-0.480966	0.647	0.434	1
Gemin7	0.320968	-0.482364	0.647	0.461	1
Ppp1cc	0.184488	-0.508065	0.647	0.445	1
Rexo2	0.843996	-0.510483	0.647	0.517	1
Srrm1	0.0784017	-0.542741	0.647	0.49	1
D17Wsu104e	0.963627	-0.543736	0.647	0.466	1
1110004F10Rik	0.935874	-0.583164	0.647	0.534	1
Derl1	0.180965	-0.608785	0.647	0.473	1
BC056474	0.0270282	-0.610879	0.647	0.408	1
Erh	0.174448	-0.621385	0.647	0.536	1
Mef2a	5.77823e-07	-0.642075	0.647	0.359	0.013487
Osbpl9	0.190395	-0.649216	0.647	0.493	1
Yipf4	0.867581	-0.672027	0.647	0.505	1
Tm9sf3	0.0584471	-0.679214	0.647	0.628	1
Acaa1a	0.0920094	-0.701942	0.647	0.447	1
Syf2	0.32969	-0.738419	0.647	0.55	1
2610001J05Rik	0.251236	-0.80787	0.647	0.531	1
Manf	0.000643575	-0.842481	0.647	0.627	1
Pitpna	0.646838	-0.914065	0.647	0.493	1
4732418C07Rik	0.0382312	-0.93516	0.647	0.434	1
Bcam	9.62062e-06	-0.980335	0.647	0.355	0.224555
AI597468	0.28727	-0.996749	0.647	0.446	1
Mcl1	0.00388024	-1.03595	0.647	0.611	1
Sypl	0.737305	-1.11218	0.647	0.515	1
Nfic	0.0044179	-1.18248	0.647	0.612	1
Serpinb6a	3.01822e-08	-1.19053	0.647	0.696	0.000704482
Hmgn1	2.45628e-06	-1.20029	0.647	0.643	0.0573321
Lrrc8a	7.7694e-25	-1.7861	0.647	0.829	1.81346e-20
Akap2	4.12143e-07	-1.81317	0.647	0.665	0.00961983
Trim54	0	4.0651	0.759	0.007	0
Cav3	0	3.3239	0.639	0.015	0
Tmem182	3.31027e-269	2.54088	0.639	0.022	7.72649e-265
Eef1a2	1.64688e-212	2.453	0.639	0.035	3.84398e-208
Angpt1	1.20534e-76	2.3672	0.639	0.112	2.81339e-72
Jph2	1.34809e-168	2.3531	0.639	0.047	3.14658e-164
Hipk2	1.29754e-94	2.18723	0.639	0.09	3.0286e-90
Nav2	2.21059e-194	2.12963	0.639	0.038	5.15974e-190
Slc25a26	1.83508e-188	2.06747	0.639	0.039	4.28325e-184
Nudt7	1.30044e-116	1.87984	0.639	0.069	3.03537e-112
1300001I01Rik	2.19578e-94	1.69334	0.639	0.091	5.12518e-90
Ehbp1	3.55558e-79	1.66056	0.639	0.106	8.29909e-75
Mrpl16	1.38431e-60	1.4964	0.639	0.125	3.23111e-56
Epha4	8.1854e-69	1.37802	0.639	0.116	1.91055e-64
Hccs	1.27238e-66	1.36788	0.639	0.114	2.96986e-62
Tln2	2.28891e-47	1.32847	0.639	0.154	5.34254e-43
Plekhb2	2.0544e-46	1.29311	0.639	0.163	4.79517e-42
Ube3b	1.57933e-52	1.24539	0.639	0.155	3.68631e-48
Msra	2.76773e-51	1.11029	0.639	0.137	6.46016e-47
Pde4a	5.0307e-66	0.990592	0.639	0.118	1.17422e-61
Mapkapk5	1.162e-77	0.961993	0.639	0.101	2.71224e-73
Tom1l2	5.24467e-38	0.951866	0.639	0.184	1.22416e-33
R3hdm2	6.00853e-33	0.861784	0.639	0.209	1.40245e-28
Atf6	4.19923e-29	0.650282	0.639	0.222	9.80142e-25
Rhot1	1.92286e-25	0.624804	0.639	0.227	4.48814e-21
Pfkl	3.08416e-30	0.574644	0.639	0.195	7.19874e-26
Usp16	4.53141e-21	0.512852	0.639	0.268	1.05768e-16
Dnajb4	1.40543e-15	0.43629	0.639	0.289	3.28041e-11
Arl3	0.000240095	0.434587	0.639	0.387	1
Nampt	8.10595e-17	0.417147	0.639	0.29	1.89201e-12
Map2k4	5.94079e-23	0.406724	0.639	0.262	1.38664e-18
Tmem50b	2.69593e-19	0.360284	0.639	0.254	6.29258e-15
Pdlim7	3.9131e-06	0.341674	0.639	0.427	0.0913357
BC003965	1.62692e-24	0.307826	0.639	0.212	3.79739e-20
Ergic2	3.04628e-12	-0.276194	0.639	0.284	7.11033e-08
Eif4b	2.07127e-05	-0.361279	0.639	0.395	0.483454
Pdcl3	0.00801469	-0.386592	0.639	0.405	1
Thrap3	0.368197	-0.444184	0.639	0.504	1
Kdelr1	0.0822923	-0.482813	0.639	0.549	1
Ik	0.0491207	-0.508263	0.639	0.467	1
Palmd	5.60498e-22	-0.522647	0.639	0.215	1.30826e-17
Hbp1	0.26656	-0.619954	0.639	0.489	1
Tex261	0.949562	-0.644394	0.639	0.487	1
Spr	0.0169775	-0.687335	0.639	0.394	1
2510006D16Rik	0.390236	-0.791083	0.639	0.532	1
Drg1	0.105132	-0.855083	0.639	0.428	1
Rcn2	0.328815	-0.871314	0.639	0.517	1
Cct6a	0.0587753	-0.895981	0.639	0.547	1
Plod1	0.794531	-0.936781	0.639	0.492	1
Chmp3	0.434832	-0.963112	0.639	0.56	1
Ap2a2	0.0419199	-0.970743	0.639	0.632	1
Ssr2	0.000195863	-1.02539	0.639	0.608	1
Ssh2	0.801397	-1.19405	0.639	0.518	1
Hnrnpm	0.0430821	-1.22252	0.639	0.656	1
P4ha1	0.0440106	-1.27064	0.639	0.567	1
Dpm3	2.62618e-05	-1.29764	0.639	0.589	0.612977
Jund	3.01375e-25	-1.32525	0.639	0.838	7.03438e-21
Ilk	3.94379e-10	-1.34444	0.639	0.708	9.2052e-06
Sdc4	2.68733e-06	-1.62574	0.639	0.708	0.0627249
Anxa5	1.28835e-46	-2.0679	0.639	0.909	3.00714e-42
Tuba1a	4.2449e-37	-2.446	0.639	0.865	9.90802e-33
Nfkbia	1.06978e-34	-2.65426	0.639	0.861	2.49698e-30
Me3	8.20515e-274	3.0015	0.632	0.022	1.91516e-269
Dsg2	5.6133e-289	2.86135	0.632	0.02	1.3102e-284
Coro6	9.048e-265	2.44324	0.632	0.022	2.11189e-260
Slc16a1	3.60712e-170	2.34563	0.632	0.045	8.41938e-166
Ank3	5.07079e-170	1.59836	0.632	0.044	1.18357e-165
Ecsit	5.13068e-62	1.50042	0.632	0.117	1.19755e-57
Ide	2.17419e-22	1.22736	0.632	0.253	5.07477e-18
Opa1	1.24976e-50	1.02358	0.632	0.154	2.91707e-46
Sccpdh	2.6505e-50	1.0174	0.632	0.143	6.18653e-46
Ipo5	4.8977e-44	0.978483	0.632	0.167	1.14317e-39
Slc27a1	2.42526e-56	0.911091	0.632	0.128	5.66081e-52
Gm561	4.87523e-50	0.900707	0.632	0.137	1.13793e-45
Mrpl44	2.87692e-50	0.812757	0.632	0.134	6.71502e-46
Tmtc1	6.62721e-30	0.706821	0.632	0.222	1.54686e-25
Chd6	1.19254e-28	0.691565	0.632	0.225	2.78351e-24
Fbxw5	3.06907e-33	0.591217	0.632	0.186	7.16351e-29
Isoc1	5.16896e-19	0.521407	0.632	0.255	1.20649e-14
2020-03-05	1.63764e-08	0.361698	0.632	0.328	0.000382241
Gmps	6.08787e-19	0.269417	0.632	0.252	1.42097e-14
Cdk16	9.29008e-14	0.258139	0.632	0.294	2.1684e-09
Sdf2	0.0211379	-0.315313	0.632	0.423	1
Dpm1	0.000507478	-0.318467	0.632	0.392	1
Adh5	0.000527311	-0.331548	0.632	0.384	1
Maea	0.000586524	-0.342103	0.632	0.384	1
Larp4b	9.32575e-14	-0.422228	0.632	0.285	2.17672e-09
Cops7a	0.0101043	-0.479709	0.632	0.404	1
B230219D22Rik	0.130639	-0.522093	0.632	0.488	1
C030046I01Rik	0.239809	-0.542108	0.632	0.535	1
2020-03-02	0.494002	-0.544766	0.632	0.484	1
Txndc15	0.0250086	-0.552898	0.632	0.412	1
Srsf10	0.037543	-0.560455	0.632	0.446	1
Gnb2	0.308531	-0.630208	0.632	0.707	1
Jmjd8	1.89527e-06	-0.731724	0.632	0.391	0.0442374
Tmem9b	0.975844	-0.750614	0.632	0.491	1
Dnajb11	0.773417	-0.79188	0.632	0.479	1
Luc7l3	0.00392869	-0.804602	0.632	0.405	1
Golt1b	0.160108	-0.809561	0.632	0.457	1
Smarca2	0.706271	-0.8286	0.632	0.498	1
Ankrd11	0.614617	-0.887663	0.632	0.531	1
Rsrc2	0.347792	-0.8964	0.632	0.508	1
Eno1	2.52056e-06	-0.982882	0.632	0.631	0.0588323
Sbds	0.147541	-1.10508	0.632	0.535	1
Tpp1	0.289492	-1.13149	0.632	0.47	1
Ube2i	3.89014e-08	-1.19493	0.632	0.658	0.000907998
G0s2	0.106813	-1.21884	0.632	0.401	1
Nucb1	5.84465e-06	-1.26894	0.632	0.634	0.13642
H1f0	3.86758e-06	-1.35537	0.632	0.624	0.0902733
Ythdf2	0.623366	-1.5697	0.632	0.494	1
Dnajc3	1.11062e-12	-1.58447	0.632	0.714	2.59229e-08
Itgb5	1.44651e-07	-1.89966	0.632	0.648	0.0033763
Klf13	9.47658e-45	-1.98306	0.632	0.91	2.21193e-40
Timp2	8.01636e-13	-2.06241	0.632	0.688	1.8711e-08
Lrrc14b	0	3.49921	0.624	0.006	0
Cited4	0	3.41943	0.624	0.008	0
Atp5sl	9.42905e-102	1.96054	0.624	0.075	2.20083e-97
Fahd1	6.0616e-115	1.7152	0.624	0.065	1.41484e-110
Atpaf1	7.399e-79	1.13841	0.624	0.091	1.727e-74
2020-03-06	1.40947e-48	1.13735	0.624	0.154	3.28985e-44
Ank	2.97351e-46	0.989245	0.624	0.155	6.94048e-42
Gm5617	3.28275e-61	0.939571	0.624	0.115	7.66227e-57
Tom1	1.53952e-36	0.924475	0.624	0.179	3.59339e-32
Ubxn6	1.60043e-15	0.800284	0.624	0.267	3.73556e-11
Msrb3	2.97019e-18	0.688928	0.624	0.261	6.93271e-14
Clpx	2.48605e-28	0.680369	0.624	0.207	5.80269e-24
Pmpca	6.29423e-37	0.652991	0.624	0.171	1.46914e-32
Gcsh	4.9288e-26	0.619942	0.624	0.207	1.15043e-21
Hagh	3.34981e-22	0.458171	0.624	0.226	7.81879e-18
Usp15	8.51275e-27	0.450759	0.624	0.223	1.98696e-22
Lias	3.52467e-30	0.403006	0.624	0.191	8.22693e-26
Chordc1	8.37062e-18	0.385746	0.624	0.255	1.95379e-13
Atad1	2.15697e-16	0.371404	0.624	0.273	5.03459e-12
Rnf5	4.83719e-14	0.275609	0.624	0.268	1.12905e-09
Itfg3	2.67179e-23	0.255343	0.624	0.223	6.23623e-19
Pcbd2	2.53984e-08	-0.25034	0.624	0.303	0.000592825
Dctn1	0.000269896	-0.264665	0.624	0.424	1
Akap9	2.74259e-08	-0.314095	0.624	0.343	0.000640147
Elavl1	0.076999	-0.335648	0.624	0.439	1
Glud1	0.70653	-0.339964	0.624	0.512	1
Acp1	0.000372003	-0.573388	0.624	0.361	1
Scand1	0.303696	-0.602212	0.624	0.521	1
Spag9	0.0102761	-0.611393	0.624	0.492	1
Nr1d1	1.23061e-09	-0.667277	0.624	0.31	2.87237e-05
Lims1	0.524712	-0.710024	0.624	0.475	1
Nap1l1	0.915709	-0.744282	0.624	0.528	1
Pcmtd1	0.00362201	-0.768636	0.624	0.402	1
Ppig	0.390987	-0.925198	0.624	0.471	1
Fam120a	0.0130026	-0.942843	0.624	0.43	1
Ssu72	0.702661	-1.01231	0.624	0.491	1
Cbx3	1.23605e-16	-1.01436	0.624	0.795	2.88506e-12
Eif4a3	0.570641	-1.07593	0.624	0.495	1
Epas1	0.982722	-1.122	0.624	0.548	1
Pgcp	0.0414777	-1.21631	0.624	0.539	1
Cav1	0.974194	-1.29013	0.624	0.504	1
Arhgdia	3.49565e-33	-1.94248	0.624	0.842	8.1592e-29
Ppap2b	3.19455e-18	-2.05286	0.624	0.75	7.45639e-14
Dcn	2.09494e-25	-3.17404	0.624	0.854	4.88981e-21
Txlnb	0	4.04293	0.857	0.033	0
Tbx5	3.38805e-266	3.41556	0.617	0.022	7.90805e-262
Nkx2-5	0	2.83778	0.617	0.004	0
Dhrs11	7.84171e-167	2.40407	0.617	0.043	1.83033e-162
Mpi	9.13093e-126	2.26091	0.617	0.059	2.13125e-121
Rnf128	1.72263e-235	2.00101	0.617	0.027	4.02079e-231
Pdk1	1.86142e-131	1.84996	0.617	0.057	4.34474e-127
E2f6	6.04299e-63	1.48237	0.617	0.115	1.41049e-58
Bckdhb	1.00271e-74	1.18725	0.617	0.095	2.34042e-70
Nkiras1	5.38346e-47	1.07771	0.617	0.153	1.25655e-42
Insr	1.14141e-55	0.938388	0.617	0.132	2.66418e-51
Pts	5.41911e-41	0.93295	0.617	0.154	1.26487e-36
Bcat2	3.82163e-36	0.855501	0.617	0.159	8.92006e-32
Tomm40l	6.27722e-37	0.824811	0.617	0.166	1.46517e-32
Zfp91	1.10194e-28	0.778425	0.617	0.2	2.57203e-24
Klhl21	3.40895e-50	0.766703	0.617	0.143	7.95684e-46
Auh	1.78285e-35	0.743306	0.617	0.174	4.16135e-31
Hbs1l	6.31793e-28	0.656641	0.617	0.207	1.47467e-23
Mrpl46	1.59855e-41	0.638191	0.617	0.147	3.73118e-37
1600012F09Rik	9.67333e-34	0.615443	0.617	0.171	2.25785e-29
Kpna1	3.35764e-37	0.550537	0.617	0.171	7.83707e-33
Ptcd2	1.44227e-43	0.527978	0.617	0.143	3.3664e-39
Osbpl8	1.75649e-23	0.49824	0.617	0.233	4.09983e-19
Tob1	1.33031e-28	0.421524	0.617	0.189	3.10509e-24
Mrpl22	9.17457e-25	0.400727	0.617	0.204	2.14144e-20
Npepps	8.15233e-16	0.355484	0.617	0.294	1.90284e-11
Pigyl	1.43528e-14	0.333893	0.617	0.253	3.35008e-10
Trap1	6.75861e-21	0.316576	0.617	0.238	1.57753e-16
Naa35	1.53964e-28	0.297106	0.617	0.196	3.59367e-24
Rab12	0.000940038	-0.261243	0.617	0.445	1
Rpl26	0.0157688	-0.330774	0.617	0.402	1
Hmox2	1.45097e-05	-0.334955	0.617	0.346	0.338672
Tceal8	0.164659	-0.388524	0.617	0.428	1
Stx7	0.0610037	-0.467198	0.617	0.433	1
Med10	2.75689e-06	-0.520102	0.617	0.316	0.0643486
Mcrs1	5.01158e-07	-0.525301	0.617	0.317	0.0116975
Sin3b	0.0397053	-0.65905	0.617	0.439	1
Cnih	0.0485916	-0.662181	0.617	0.406	1
Bzw1	0.329383	-0.691247	0.617	0.493	1
Fcf1	0.00158743	-0.759594	0.617	0.366	1
Dnpep	0.0036504	-0.76031	0.617	0.378	1
Tspan12	2.99365e-05	-0.808054	0.617	0.34	0.698748
Smu1	0.15677	-0.849752	0.617	0.42	1
Pdap1	0.147105	-0.955029	0.617	0.547	1
Cnpy2	0.00527852	-0.993436	0.617	0.56	1
Bclaf1	0.295414	-1.11455	0.617	0.463	1
Smpdl3a	5.51279e-07	-1.56103	0.617	0.63	0.0128674
Mfge8	1.37924e-14	-1.80403	0.617	0.731	3.21928e-10
Timp3	3.97587e-30	-1.98348	0.617	0.828	9.28007e-26
Arpc4	1.97791e-15	-2.08212	0.617	0.72	4.61664e-11
Tecrl	0	4.033	0.602	0.001	0
Spnb1	0	3.0783	0.609	0.012	0
Rragd	1.63625e-261	2.45566	0.609	0.021	3.81916e-257
1300010F03Rik	1.88384e-104	2.2292	0.609	0.073	4.39707e-100
Homer1	6.95872e-206	2.18428	0.609	0.031	1.62424e-201
Acacb	5.14826e-161	2.04807	0.609	0.043	1.20166e-156
Hspa4l	1.00108e-67	1.73773	0.609	0.105	2.33663e-63
Ptpla	1.12568e-64	1.53667	0.609	0.112	2.62744e-60
Gfm1	7.52975e-63	1.31597	0.609	0.113	1.75752e-58
Fars2	1.3069e-57	1.31015	0.609	0.12	3.05044e-53
Gm14420	6.1699e-41	1.135	0.609	0.164	1.44012e-36
Ppp1r12b	6.259e-58	1.09342	0.609	0.12	1.46091e-53
Cul3	8.90204e-34	1.00412	0.609	0.193	2.07782e-29
Glrx	1.27835e-44	0.993746	0.609	0.139	2.9838e-40
Afg3l2	2.6487e-41	0.958736	0.609	0.163	6.18233e-37
Asb8	1.54446e-43	0.927683	0.609	0.148	3.60493e-39
Tsfm	5.91187e-36	0.841929	0.609	0.155	1.37989e-31
Prosc	9.4257e-20	0.830023	0.609	0.233	2.20005e-15
Mpp6	2.98616e-31	0.711549	0.609	0.177	6.96999e-27
Cxx1b	1.67426e-13	0.626124	0.609	0.299	3.90788e-09
Mrpl37	2.7067e-30	0.592484	0.609	0.187	6.31772e-26
Habp4	9.53781e-27	0.588666	0.609	0.201	2.22622e-22
Spg7	2.88217e-26	0.565633	0.609	0.209	6.72727e-22
1110008P14Rik	3.94998e-28	0.535764	0.609	0.176	9.21964e-24
Ehbp1l1	1.19018e-23	0.513717	0.609	0.222	2.77799e-19
Acot7	4.42368e-34	0.42049	0.609	0.169	1.03253e-29
2310009A05Rik	8.37586e-21	0.372938	0.609	0.209	1.95501e-16
Rad23b	6.30651e-07	0.353574	0.609	0.377	0.01472
Tfpi	1.95445e-21	0.33062	0.609	0.23	4.56189e-17
Trappc1	1.38948e-12	0.329251	0.609	0.263	3.24319e-08
Neat1	0.00300549	0.290596	0.609	0.448	1
Pih1d1	2.6875e-11	-0.260273	0.609	0.267	6.2729e-07
Zmat2	0.176732	-0.269651	0.609	0.465	1
Fam174a	0.00483682	-0.270777	0.609	0.379	1
Pitpnb	3.60043e-06	-0.306549	0.609	0.35	0.0840377
Irak1	0.0193552	-0.332606	0.609	0.417	1
Atp6v0d1	0.0461373	-0.397122	0.609	0.489	1
Scoc	7.69745e-05	-0.402727	0.609	0.349	1
Jkamp	0.0125494	-0.460632	0.609	0.393	1
Lonp2	1.81619e-07	-0.48049	0.609	0.325	0.00423917
Actr1a	0.0191309	-0.49435	0.609	0.423	1
Mbd3	2.13459e-05	-0.497668	0.609	0.346	0.498236
Cfdp1	0.409644	-0.549962	0.609	0.503	1
Rbm3	0.901618	-0.615869	0.609	0.462	1
Srsf7	0.0486984	-0.75896	0.609	0.407	1
Chd4	0.0275139	-0.834009	0.609	0.446	1
Dek	0.346175	-0.875198	0.609	0.558	1
Tcea1	0.0145846	-0.9735	0.609	0.572	1
Sec11a	8.41562e-05	-1.12682	0.609	0.585	1
1110002B05Rik	0.00175187	-1.20723	0.609	0.554	1
Mtdh	0.000410371	-1.2273	0.609	0.608	1
Ergic3	0.00118473	-1.25448	0.609	0.574	1
Zfp207	0.0146515	-1.27448	0.609	0.601	1
Actr3	0.0080939	-1.29725	0.609	0.579	1
Anp32b	2.88368e-07	-1.35799	0.609	0.643	0.00673081
Tmem176b	0.255868	-1.58783	0.609	0.518	1
Msn	1.60131e-11	-1.60354	0.609	0.713	3.73761e-07
Btg2	7.62292e-17	-1.93005	0.609	0.778	1.77927e-12
Mylk4	0	4.01816	0.602	0.003	0
Lrrc2	0	4.01268	0.677	0.007	0
Rpl3l	0	3.96261	0.602	0.004	0
Synpo2l	0	3.66598	0.602	0.006	0
Lmod3	0	3.60941	0.602	0.004	0
Pm20d2	8.64682e-267	2.50061	0.602	0.019	2.01825e-262
Fuca2	8.61002e-78	1.97169	0.602	0.096	2.00966e-73
Lrpprc	9.165e-66	1.72146	0.602	0.115	2.1392e-61
Gstm7	3.82229e-111	1.57731	0.602	0.062	8.9216e-107
Hist1h4h	2.20864e-168	1.36193	0.602	0.039	5.15518e-164
Lrrc3b	1.19904e-167	1.30908	0.602	0.038	2.79867e-163
Larp1b	3.93465e-88	1.27733	0.602	0.083	9.18386e-84
Kcmf1	3.18032e-13	1.06865	0.602	0.28	7.42317e-09
Apool	3.36243e-65	1.03023	0.602	0.104	7.84824e-61
2310067B10Rik	1.48254e-39	1.02815	0.602	0.163	3.46039e-35
Ubr3	1.78601e-37	0.998722	0.602	0.18	4.16873e-33
4930481A15Rik	2.33907e-77	0.9827	0.602	0.091	5.45962e-73
D5Ertd579e	2.75901e-55	0.793	0.602	0.126	6.43979e-51
Gcdh	8.56428e-48	0.560736	0.602	0.128	1.99899e-43
Adcy6	4.64489e-41	0.54033	0.602	0.151	1.08416e-36
Lap3	5.63608e-26	0.470793	0.602	0.199	1.31552e-21
2310039H08Rik	1.35256e-22	0.438511	0.602	0.202	3.15702e-18
Rhoq	3.04156e-18	0.383101	0.602	0.259	7.0993e-14
Atp11a	9.26953e-19	0.345888	0.602	0.263	2.1636e-14
Ccdc90a	2.67075e-16	0.312594	0.602	0.253	6.23381e-12
Mgea5	6.8598e-14	0.266124	0.602	0.3	1.60115e-09
Dync1li1	0.00391777	-0.254318	0.602	0.399	1
Anp32e	1.73166e-06	-0.264734	0.602	0.334	0.0404187
Gspt1	6.40042e-06	-0.356295	0.602	0.355	0.149392
Slc48a1	0.0340057	-0.429303	0.602	0.417	1
Tmem33	3.67201e-05	-0.490617	0.602	0.338	0.857085
Armc1	3.01743e-08	-0.534022	0.602	0.304	0.000704298
Tceb3	0.000275635	-0.542454	0.602	0.371	1
2810407C02Rik	0.0198483	-0.546344	0.602	0.431	1
Scarb2	0.00900957	-0.549938	0.602	0.403	1
Copg	0.262407	-0.623707	0.602	0.458	1
Ap2s1	0.0167075	-0.679877	0.602	0.536	1
Grina	0.974791	-0.68693	0.602	0.467	1
Gpx8	0.775842	-0.826804	0.602	0.433	1
Pon2	0.554235	-0.85106	0.602	0.451	1
Utrn	0.00881261	-0.872694	0.602	0.417	1
Ccnd3	0.0910431	-0.987568	0.602	0.526	1
Scaf11	0.0574714	-0.991295	0.602	0.43	1
Mef2c	0.117083	-1.08153	0.602	0.447	1
2010106G01Rik	0.687661	-1.12937	0.602	0.498	1
Smarca5	0.51	-1.15849	0.602	0.512	1
Inpp4a	0.504969	-1.19336	0.602	0.438	1
Cr1l	0.0654427	-1.20003	0.602	0.52	1
Prr13	3.57253e-07	-1.23417	0.602	0.649	0.00833864
Snrpd3	0.00139269	-1.25274	0.602	0.552	1
Mosc2	0.117775	-1.31637	0.602	0.491	1
Stt3a	0.000133211	-1.54224	0.602	0.611	1
Rap1b	1.11504e-18	-2.07969	0.602	0.75	2.60261e-14
Camk2a	1.36296e-250	3.00807	0.594	0.022	3.18129e-246
1700113I22Rik	1.02286e-201	2.46268	0.594	0.03	2.38746e-197
Osbp	6.35454e-63	1.41855	0.594	0.114	1.48321e-58
Gm12824	8.66858e-81	1.3166	0.594	0.085	2.02333e-76
Samd4	2.59387e-42	1.1207	0.594	0.147	6.05435e-38
Lonp1	2.28372e-40	0.961373	0.594	0.151	5.33042e-36
Cog6	7.18723e-49	0.792717	0.594	0.13	1.67757e-44
As3mt	8.60475e-47	0.709626	0.594	0.128	2.00843e-42
Cdadc1	1.53925e-24	0.55606	0.594	0.196	3.59277e-20
Mrps11	5.03141e-28	0.482577	0.594	0.175	1.17438e-23
0610009B22Rik	1.82095e-24	0.307995	0.594	0.187	4.25027e-20
Itga7	8.17882e-86	0.288742	0.594	0.077	1.90902e-81
Thoc7	4.62187e-05	-0.301362	0.594	0.381	1
Nbeal1	2.95213e-06	-0.308762	0.594	0.358	0.0689056
Sfpq	0.115762	-0.365681	0.594	0.462	1
Tmem208	3.54039e-06	-0.382252	0.594	0.315	0.0826362
Ypel5	0.000569189	-0.443797	0.594	0.371	1
Fez2	0.0211523	-0.46024	0.594	0.398	1
Cnn2	0.0888426	-0.479257	0.594	0.556	1
Cul1	0.0200189	-0.520774	0.594	0.424	1
Dnajb9	0.0042942	-0.574875	0.594	0.375	1
Hnrnph2	0.134369	-0.656899	0.594	0.455	1
Tmem167	0.377678	-0.720985	0.594	0.444	1
Mob4	0.000466718	-0.748947	0.594	0.358	1
Abhd4	0.000725186	-0.749751	0.594	0.358	1
Tbrg1	0.000251589	-1.02963	0.594	0.624	1
Socs2	0.552035	-1.04473	0.594	0.473	1
Ddx3x	0.0388739	-1.20302	0.594	0.608	1
Srsf11	0.0842625	-1.20678	0.594	0.53	1
Rnh1	0.000640949	-1.30094	0.594	0.589	1
Mcfd2	0.0803471	-1.31656	0.594	0.506	1
Cstb	5.59416e-06	-1.36753	0.594	0.58	0.130573
Mll5	9.77781e-07	-1.37023	0.594	0.663	0.0228224
Akap13	1.03674e-06	-1.41583	0.594	0.662	0.0241986
Tmed9	3.02252e-15	-1.57806	0.594	0.715	7.05488e-11
Itm2c	4.44314e-22	-1.95393	0.594	0.747	1.03707e-17
Myl3	1.18296e-167	5.11656	0.586	0.04	2.76114e-163
Asb14	0	4.08323	0.586	0.003	0
Slc47a1	0	4.01171	0.586	0.01	0
Xirp1	0	3.68074	0.586	0.004	0
Bves	0	3.62394	0.586	0.004	0
Pkp2	1.143e-296	2.8935	0.586	0.015	2.66787e-292
Kcnq1	2.47752e-253	2.20357	0.586	0.02	5.78278e-249
Neurl2	1.73269e-181	2.20148	0.586	0.034	4.04427e-177
1810012P15Rik	6.18603e-203	2.04954	0.586	0.028	1.44388e-198
Rtn4ip1	1.53309e-157	1.82152	0.586	0.041	3.57838e-153
Timm10	2.04428e-63	1.31133	0.586	0.103	4.77156e-59
Cish	1.57867e-91	1.14986	0.586	0.073	3.68477e-87
Ciapin1	2.1077e-38	1.0615	0.586	0.145	4.91959e-34
Magi3	2.868e-60	0.980126	0.586	0.111	6.69419e-56
Rabggtb	6.40138e-48	0.960409	0.586	0.129	1.49415e-43
Ppm1b	5.64772e-21	0.886294	0.586	0.222	1.31823e-16
Rsph3b	3.11659e-47	0.884162	0.586	0.134	7.27444e-43
Cox19	3.6109e-33	0.828219	0.586	0.162	8.42821e-29
Ube2d1	9.97702e-22	0.798867	0.586	0.204	2.32874e-17
Trak2	8.735e-42	0.786245	0.586	0.148	2.03884e-37
Narf	2.45261e-48	0.777778	0.586	0.129	5.72463e-44
Parl	1.17866e-23	0.725143	0.586	0.203	2.7511e-19
Pcnt	1.70289e-31	0.664794	0.586	0.175	3.97471e-27
Myo18a	2.02616e-39	0.649065	0.586	0.161	4.72927e-35
2310003C23Rik	1.85616e-26	0.478912	0.586	0.203	4.33247e-22
Lgr4	2.30413e-35	0.353516	0.586	0.152	5.37806e-31
Mrps31	1.26638e-43	0.302546	0.586	0.126	2.95587e-39
Usp47	4.34485e-22	0.290672	0.586	0.225	1.01413e-17
Bmpr1a	8.95071e-18	0.270837	0.586	0.253	2.08919e-13
Twsg1	0.0019999	-0.277156	0.586	0.42	1
Mycbp2	0.000374128	-0.313695	0.586	0.413	1
Ube2s	0.142241	-0.337016	0.586	0.427	1
Gpbp1	0.000534768	-0.350173	0.586	0.388	1
Cds2	5.90102e-07	-0.37806	0.586	0.336	0.0137736
Dars	1.44476e-06	-0.379911	0.586	0.331	0.0337222
Med21	2.46678e-07	-0.426618	0.586	0.293	0.0057577
Tnrc6b	0.000898451	-0.433096	0.586	0.402	1
Ccar1	3.76116e-05	-0.465401	0.586	0.345	0.877893
Kpna4	3.89782e-07	-0.663659	0.586	0.342	0.00909791
Dynlt3	0.149072	-0.850572	0.586	0.41	1
Snx5	0.200967	-0.971781	0.586	0.431	1
Yipf3	0.629906	-0.994069	0.586	0.456	1
Abhd16a	0.402461	-1.15654	0.586	0.475	1
Nono	0.419761	-1.18949	0.586	0.491	1
Pofut2	0.23477	-1.23779	0.586	0.408	1
Sec61b	1.2399e-08	-1.3203	0.586	0.624	0.000289405
Cdc42ep3	0.870388	-1.43912	0.586	0.422	1
Chmp5	0.0161997	-1.53953	0.586	0.53	1
Nufip2	0.00060732	-1.62136	0.586	0.6	1
Hexa	2.94474e-09	-1.70473	0.586	0.647	6.87332e-05
Adam10	5.69231e-08	-1.76223	0.586	0.651	0.00132864
Ywhaq	9.51397e-35	-1.94779	0.586	0.859	2.22066e-30
Plin4	0	3.55477	0.579	0.009	0
2310050B05Rik	0	2.72823	0.579	0.005	0
Agtpbp1	4.58919e-69	1.82334	0.579	0.099	1.07116e-64
Cacna2d1	1.39311e-53	1.42335	0.579	0.126	3.25167e-49
Kbtbd3	7.49388e-61	1.30946	0.579	0.103	1.74915e-56
Slc41a3	7.44353e-55	1.24988	0.579	0.114	1.7374e-50
Galt	1.16497e-53	1.0057	0.579	0.113	2.71914e-49
Atg10	1.66345e-63	0.88656	0.579	0.098	3.88266e-59
Ascc1	2.3832e-51	0.837624	0.579	0.113	5.56262e-47
Dctpp1	1.02685e-35	0.813722	0.579	0.146	2.39676e-31
Usp24	8.11989e-37	0.776395	0.579	0.161	1.89526e-32
Cox10	1.06303e-65	0.765364	0.579	0.094	2.48123e-61
Stk11	1.96655e-07	0.724803	0.579	0.304	0.00459012
Mrpl50	3.87452e-28	0.62653	0.579	0.179	9.04351e-24
Mrrf	3.44283e-36	0.556807	0.579	0.147	8.03592e-32
2310022B05Rik	4.08626e-21	0.499851	0.579	0.223	9.53774e-17
Tfdp2	2.23553e-28	0.40208	0.579	0.179	5.21795e-24
Mzt1	2.05647e-21	0.384391	0.579	0.203	4.80001e-17
Nbr1	1.47231e-11	0.367221	0.579	0.295	3.43653e-07
Usp14	4.16195e-14	0.339877	0.579	0.261	9.71441e-10
Usp19	9.17937e-22	0.335432	0.579	0.217	2.14256e-17
Wdr18	1.50533e-25	0.322621	0.579	0.178	3.51359e-21
Ano10	4.38738e-23	0.302126	0.579	0.202	1.02406e-18
Snap47	6.45151e-16	0.251586	0.579	0.221	1.50585e-11
Atf7ip	0.00135241	-0.295667	0.579	0.402	1
Dync1i2	0.513916	-0.304327	0.579	0.611	1
Hnrnph1	0.961426	-0.322161	0.579	0.517	1
Tardbp	8.20385e-08	-0.344404	0.579	0.309	0.00191486
Ilkap	1.42257e-08	-0.399435	0.579	0.291	0.000332041
Nsfl1c	0.00749956	-0.450564	0.579	0.379	1
Cdc26	0.0130275	-0.4876	0.579	0.361	1
Baz1b	0.00802422	-0.611972	0.579	0.375	1
Ccdc23	0.0511549	-0.613829	0.579	0.379	1
Clk1	0.00260213	-0.655186	0.579	0.409	1
Sirt2	0.0390256	-0.660267	0.579	0.396	1
Gps1	0.0680328	-0.669296	0.579	0.379	1
0610037L13Rik	0.00378553	-0.704842	0.579	0.367	1
Cdk4	0.253536	-0.916272	0.579	0.489	1
Anxa7	0.406637	-0.932578	0.579	0.487	1
Nipbl	0.416345	-0.955074	0.579	0.474	1
Emp2	0.534311	-1.07749	0.579	0.416	1
Aip	0.779534	-1.07776	0.579	0.452	1
Cyba	2.761e-20	-1.7161	0.579	0.754	6.44445e-16
Pde4b	0.0084586	-1.84229	0.579	0.537	1
App	1.80133e-40	-2.18543	0.579	0.877	4.2045e-36
Sat1	2.01851e-20	-2.23397	0.579	0.755	4.7114e-16
Trim55	0	3.65855	0.571	0.002	0
Nebl	0	2.20647	0.571	0.009	0
Ggnbp1	2.10005e-293	1.99178	0.571	0.014	4.90173e-289
Gm20594	1.01504e-85	1.78237	0.571	0.082	2.36921e-81
Trmt5	2.46957e-129	1.55204	0.571	0.047	5.76422e-125
Mccc2	1.31054e-70	1.49453	0.571	0.087	3.05893e-66
Vegfa	3.78088e-89	1.3827	0.571	0.073	8.82494e-85
Ptcd3	9.58095e-47	1.32845	0.571	0.132	2.23629e-42
Acy3	1.65529e-72	1.12254	0.571	0.083	3.86362e-68
Dip2c	3.94262e-43	1.09539	0.571	0.139	9.20247e-39
Lbh	4.16269e-15	1.05211	0.571	0.302	9.71614e-11
Fam20b	1.49081e-30	0.984024	0.571	0.179	3.47969e-26
Aldh4a1	8.33829e-58	0.883284	0.571	0.107	1.94624e-53
Slc25a20	3.63771e-46	0.771018	0.571	0.124	8.49077e-42
l7Rn6	7.3294e-07	0.722556	0.571	0.301	0.0171076
Dnajc30	7.31387e-18	0.680975	0.571	0.216	1.70713e-13
Arhgap26	5.43875e-48	0.668856	0.571	0.12	1.26946e-43
6330578E17Rik	8.00592e-26	0.659035	0.571	0.198	1.86866e-21
Ppil1	1.52135e-42	0.650308	0.571	0.125	3.55098e-38
Naa15	1.74565e-22	0.647048	0.571	0.237	4.07452e-18
Rfxank	3.02503e-26	0.640601	0.571	0.192	7.06073e-22
Ypel2	2.07059e-39	0.628516	0.571	0.139	4.83297e-35
Abhd11	2.48657e-33	0.562018	0.571	0.152	5.8039e-29
Akr7a5	4.55548e-18	0.545567	0.571	0.213	1.06329e-13
Lars	2.96284e-22	0.506122	0.571	0.202	6.91556e-18
Atxn2	2.36338e-26	0.489157	0.571	0.193	5.51637e-22
Dync1li2	1.99306e-07	0.479402	0.571	0.317	0.004652
Cmc1	3.93751e-28	0.352627	0.571	0.167	9.19055e-24
Hmg20b	3.89108e-11	-0.269425	0.571	0.278	9.08218e-07
Hmgn5	3.66678e-11	-0.285995	0.571	0.257	8.55863e-07
Dennd5a	1.0028e-05	-0.288283	0.571	0.367	0.234062
Magoh	0.000194738	-0.306011	0.571	0.322	1
Azin1	5.51359e-12	-0.313467	0.571	0.273	1.28693e-07
Zadh2	1.94604e-11	-0.396919	0.571	0.269	4.54225e-07
Rchy1	3.9823e-08	-0.451875	0.571	0.289	0.000929509
Ppp1r12a	0.0625285	-0.545406	0.571	0.44	1
Snrpd1	0.0443499	-0.562151	0.571	0.361	1
Pole4	0.000359291	-0.563614	0.571	0.336	1
Psmd3	0.0708401	-0.569056	0.571	0.387	1
Med1	0.635558	-0.619998	0.571	0.452	1
Efr3a	0.000279986	-0.683679	0.571	0.348	1
Psmd13	0.0844786	-0.703185	0.571	0.386	1
Bud31	0.0605852	-0.776244	0.571	0.369	1
Erp44	0.309197	-0.794801	0.571	0.487	1
Mir682	6.82301e-23	-0.821002	0.571	0.845	1.59256e-18
Ufm1	9.57347e-05	-0.840471	0.571	0.32	1
Gabarapl1	0.0173744	-0.929247	0.571	0.604	1
Tuba1c	0.0170869	-0.995423	0.571	0.739	1
Gnl3l	0.0012454	-1.02774	0.571	0.345	1
Vezf1	0.307519	-1.10313	0.571	0.427	1
Mesdc2	0.76285	-1.1301	0.571	0.457	1
Ptms	9.26925e-21	-1.43379	0.571	0.803	2.16353e-16
Nr3c1	5.88663e-09	-1.49261	0.571	0.654	0.0001374
Psmb10	0.000177529	-1.66396	0.571	0.528	1
Tacc1	1.33131e-17	-1.71277	0.571	0.806	3.10741e-13
Abcc8	0	3.90365	0.564	0.009	0
Ggct	1.45926e-92	2.3791	0.564	0.066	3.40605e-88
Fgf13	9.59257e-163	2.31643	0.564	0.035	2.239e-158
Slc12a7	3.37982e-82	1.93964	0.564	0.078	7.88883e-78
Gsto1	9.3027e-42	1.8101	0.564	0.151	2.17134e-37
Fam158a	2.27638e-43	1.60971	0.564	0.125	5.31329e-39
Mmachc	3.34669e-98	1.48866	0.564	0.064	7.8115e-94
Nol3	1.26249e-115	1.39661	0.564	0.05	2.94679e-111
Smarcd3	1.29794e-50	1.26186	0.564	0.119	3.02951e-46
Pgm5	3.64298e-120	1.26161	0.564	0.049	8.50309e-116
Polb	1.88916e-18	1.20882	0.564	0.223	4.40949e-14
Alb	5.85743e-90	1.17964	0.564	0.072	1.36718e-85
Ndufaf1	2.40418e-56	1.05384	0.564	0.103	5.61159e-52
Mrps9	9.70674e-43	0.947756	0.564	0.132	2.26565e-38
2900076A07Rik	1.73138e-106	0.90759	0.564	0.056	4.04121e-102
Ptges2	2.25965e-48	0.81131	0.564	0.115	5.27424e-44
Fto	5.03349e-13	0.782616	0.564	0.278	1.17487e-08
Abcd3	1.70948e-23	0.742041	0.564	0.219	3.9901e-19
Uxt	6.82417e-41	0.593026	0.564	0.129	1.59283e-36
Dnajc4	2.89375e-26	0.478206	0.564	0.169	6.75431e-22
Dnajb2	1.2265e-17	0.414308	0.564	0.229	2.86277e-13
Ethe1	1.35932e-19	0.382033	0.564	0.208	3.1728e-15
Myl9	1.60893e-10	0.323922	0.564	0.319	3.75541e-06
N6amt2	9.70514e-27	0.297822	0.564	0.167	2.26528e-22
Taz	3.79465e-13	-0.251402	0.564	0.234	8.85709e-09
Ncaph2	4.96586e-05	-0.279222	0.564	0.348	1
Pdzd11	2.07777e-10	-0.293779	0.564	0.249	4.84971e-06
Mocs2	0.000923389	-0.296068	0.564	0.339	1
1500003O03Rik	0.0960318	-0.317569	0.564	0.428	1
Snrpc	0.719411	-0.32897	0.564	0.464	1
Taf12	1.88896e-09	-0.342441	0.564	0.261	4.40902e-05
Tiprl	1.35673e-05	-0.408228	0.564	0.3	0.316674
Naa38	0.000254406	-0.422247	0.564	0.313	1
Dnttip2	0.000265503	-0.459445	0.564	0.334	1
Dda1	2.678e-05	-0.47236	0.564	0.318	0.625071
Snap23	0.00851687	-0.507764	0.564	0.378	1
Fubp1	8.92409e-05	-0.515133	0.564	0.344	1
Eif4e3	0.0202303	-0.531241	0.564	0.362	1
3110003A17Rik	0.000648089	-0.577532	0.564	0.32	1
Wdr26	5.17217e-05	-0.618782	0.564	0.355	1
Rcsd1	1.965e-08	-0.625197	0.564	0.28	0.00045865
Crk	0.00924816	-0.640738	0.564	0.405	1
Pa2g4	0.00379555	-0.660362	0.564	0.363	1
2310036O22Rik	0.150182	-0.682576	0.564	0.499	1
Idh1	0.0802712	-0.804362	0.564	0.388	1
Clptm1l	0.424419	-0.827064	0.564	0.417	1
Abhd12	0.00388258	-0.850777	0.564	0.366	1
Lman2	0.0050125	-0.92264	0.564	0.565	1
Snw1	0.466008	-0.960864	0.564	0.476	1
Apbb2	0.000500684	-0.993587	0.564	0.343	1
Fkbp2	0.0833559	-1.00821	0.564	0.471	1
Picalm	0.853215	-1.02033	0.564	0.545	1
Pim3	0.00119487	-1.02238	0.564	0.333	1
Tex264	0.591162	-1.03014	0.564	0.405	1
Spna2	0.619951	-1.0482	0.564	0.521	1
Rap1a	0.00228454	-1.11195	0.564	0.525	1
Smc3	0.474819	-1.20226	0.564	0.471	1
Wbp5	4.14946e-06	-1.2194	0.564	0.609	0.0968526
Wtap	4.58669e-08	-1.5554	0.564	0.693	0.00107058
Nfe2l2	6.85772e-07	-1.55601	0.564	0.646	0.0160066
S100a16	1.17392e-16	-1.80067	0.564	0.702	2.74004e-12
Ncoa3	3.40273e-12	-2.06723	0.564	0.683	7.94232e-08
Col4a2	7.61959e-06	-2.17481	0.564	0.587	0.177849
Nrp1	1.05078e-27	-2.18038	0.564	0.841	2.45263e-23
Fos	8.315e-09	-2.2078	0.564	0.726	0.00019408
Sbk2	0	4.61834	0.556	0.004	0
Scn5a	0	4.13617	0.556	0.001	0
Kcnj3	0	3.96236	0.556	0	0
Kif21a	2.44433e-145	2.71895	0.556	0.039	5.70531e-141
Gys1	1.90159e-138	2.13943	0.556	0.043	4.4385e-134
Gm10336	4.05424e-115	2.12493	0.556	0.053	9.463e-111
Sirt3	2.70488e-60	1.79276	0.556	0.097	6.31346e-56
Kif13a	6.18848e-41	1.57108	0.556	0.139	1.44445e-36
Uros	8.38907e-86	1.55143	0.556	0.068	1.95809e-81
Dcun1d2	2.3211e-76	1.41921	0.556	0.078	5.41769e-72
Hibch	1.06257e-72	1.26454	0.556	0.08	2.48016e-68
Prune2	3.05298e-52	1.14371	0.556	0.108	7.12595e-48
Bri3bp	1.73979e-40	1.02917	0.556	0.132	4.06084e-36
Rcan1	3.09866e-37	0.922063	0.556	0.145	7.23258e-33
Dut	7.9187e-39	0.734975	0.556	0.129	1.8483e-34
Blcap	8.5744e-22	0.704783	0.556	0.186	2.00135e-17
Pstk	4.87623e-47	0.695067	0.556	0.113	1.13816e-42
Tsc2	2.33636e-31	0.627018	0.556	0.164	5.45329e-27
Brwd1	1.46647e-19	0.489065	0.556	0.222	3.4229e-15
Chkb	7.29815e-45	0.480133	0.556	0.115	1.70346e-40
Oxa1l	7.78354e-25	0.474106	0.556	0.182	1.81676e-20
Zdhhc5	6.4964e-18	0.424846	0.556	0.232	1.51633e-13
Ppm1a	1.99346e-10	0.417846	0.556	0.308	4.65294e-06
4930471M23Rik	1.85028e-21	0.313531	0.556	0.186	4.31875e-17
Pdlim4	7.23697e-38	0.269694	0.556	0.138	1.68918e-33
Srek1ip1	5.67401e-34	0.258564	0.556	0.141	1.32437e-29
Brd7	1.76213e-14	-0.255655	0.556	0.246	4.11298e-10
Usp4	9.76917e-08	-0.300063	0.556	0.306	0.00228022
Snapc5	0.000741348	-0.308852	0.556	0.34	1
Kpnb1	1.35119e-08	-0.32477	0.556	0.316	0.000315382
Insig2	1.40366e-05	-0.326225	0.556	0.325	0.327629
Smarce1	0.197192	-0.349053	0.556	0.435	1
Rbfox2	1.22722e-11	-0.350259	0.556	0.259	2.86446e-07
Ubfd1	2.71983e-06	-0.386135	0.556	0.311	0.0634836
1810074P20Rik	6.60806e-09	-0.443631	0.556	0.271	0.000154239
Ubqln1	0.00010455	-0.457074	0.556	0.347	1
Pnn	0.0013916	-0.503135	0.556	0.342	1
Mia3	0.11153	-0.513536	0.556	0.415	1
Clic5	1.82046e-21	-0.58693	0.556	0.189	4.24913e-17
2810002N01Rik	8.83284e-07	-0.614484	0.556	0.289	0.0206167
Tenc1	0.691404	-0.627469	0.556	0.482	1
Clcc1	0.000161801	-0.668224	0.556	0.329	1
[truncated: 3,592 more rows]

## Sheet: Fibro
	p_val	avg_logFC	pct.1	pct.2	p_val_adj
Sepp1	0.00268628	-0.588123	0.986	0.902	1
Spnb2	0.105538	-0.467097	0.97	0.816	1
Gnas	0.000870846	-0.279423	0.967	0.947	1
Aldoa	5.88981e-05	-0.335868	0.941	0.886	1
Sparcl1	0.415553	-0.427402	0.924	0.691	1
Crip2	8.78543e-05	-0.301012	0.916	0.769	1
Hnrnpa2b1	0.00117916	-0.305092	0.908	0.883	1
Cox8a	0.000513019	-0.285796	0.902	0.812	1
Atp5l	0.211454	-0.257973	0.899	0.771	1
Atp5a1	0.000268625	-0.462719	0.889	0.814	1
Lrrc8a	0.98832	-0.443952	0.888	0.762	1
Atp5h	0.000309787	-0.608353	0.864	0.769	1
Grn	0.0100883	-0.354388	0.859	0.741	1
Sdcbp	0.00797872	-0.343166	0.856	0.755	1
Tacc1	0.103797	-0.321545	0.85	0.75	1
Pkm2	0.00305034	-0.342963	0.834	0.76	1
Shisa5	0.00238556	-0.355522	0.83	0.75	1
Ywhab	0.0349848	-0.350203	0.825	0.779	1
Pea15a	0.0079276	-0.375584	0.824	0.748	1
Mfge8	0.832201	-0.751832	0.804	0.655	1
Mdh2	0.106228	-0.405012	0.796	0.71	1
Slc25a3	0.0605794	-0.298689	0.794	0.691	1
Csde1	0.28346	-0.390954	0.794	0.7	1
Ndufa2	0.152293	-0.325938	0.792	0.697	1
Uqcrh	0.169785	-0.456404	0.79	0.693	1
Ramp2	0.000272818	-0.51602	0.788	0.525	1
Atp5d	0.906708	-0.275404	0.784	0.691	1
Atp5c1	0.112254	-0.490327	0.783	0.695	1
Ndufb10	0.34771	-0.495113	0.781	0.643	1
Usmg5	0.000831171	-0.602867	0.779	0.694	1
Dnaja1	0.0200436	-0.425843	0.778	0.729	1
Atp5f1	0.802534	-0.417166	0.777	0.668	1
Ece1	0.634522	-0.652345	0.774	0.644	1
Csnk2a1	0.000850416	-0.273041	0.773	0.654	1
Rab14	0.268589	-0.327422	0.772	0.705	1
Lpl	0.442279	-0.328364	0.77	0.671	1
Atp5g1	0.0106343	-0.99128	0.766	0.628	1
Gltscr2	0.000854705	-0.279374	0.756	0.665	1
Uqcr10	0.000427138	-0.579138	0.756	0.673	1
Atp1b3	0.753469	-0.4548	0.753	0.663	1
Atp5o	0.0152916	-0.696145	0.751	0.672	1
Hnrnpu	0.910189	-0.333878	0.749	0.684	1
Col4a1	0.130976	-0.666736	0.748	0.634	1
D8Ertd738e	0.0333847	-0.306814	0.742	0.671	1
Atp5k	0.0113738	-0.484619	0.742	0.667	1
Ndufb9	0.846157	-0.484218	0.74	0.64	1
Zfp36	0.0441866	-0.253603	0.738	0.725	1
Tax1bp1	0.00565901	-0.261303	0.738	0.639	1
Tpm1	0.00014952	-1.47833	0.738	0.656	1
Hnrnpl	0.45356	-0.322731	0.731	0.633	1
Rhob	0.000377063	-0.503859	0.731	0.705	1
Ndufs7	0.243162	-0.40918	0.728	0.609	1
Gnb2	0.000667568	-0.566634	0.725	0.686	1
Mbnl2	0.0592658	-0.456136	0.724	0.69	1
Ctsa	0.192864	-0.508215	0.722	0.644	1
Pabpc1	0.0521691	-0.333689	0.719	0.638	1
Sub1	0.00460832	-0.475639	0.716	0.653	1
Litaf	0.00536731	-0.32611	0.715	0.605	1
Sdhb	0.801683	-0.508113	0.714	0.619	1
Cltc	0.55943	-0.529588	0.714	0.634	1
Akap2	0.734036	-0.523989	0.709	0.623	1
Zfp706	0.0312809	-0.286198	0.702	0.598	1
Ndufs6	0.379211	-0.432123	0.699	0.601	1
Birc6	0.0255165	-0.401622	0.696	0.607	1
Uqcrc1	0.000119252	-0.562321	0.696	0.645	1
Minos1	0.000542002	-0.450824	0.695	0.638	1
Gabarapl2	0.149048	-0.34624	0.693	0.618	1
Ccdc72	0.607927	-0.265159	0.692	0.597	1
Ghitm	0.866422	-0.463266	0.692	0.61	1
Ndufb8	0.00126637	-0.647738	0.69	0.61	1
Atp5g3	0.0887054	-0.623511	0.689	0.628	1
Cox7b	0.17298	-0.562919	0.687	0.576	1
Arf6	0.419954	-0.464191	0.686	0.626	1
Ndufa1	0.208827	-0.454129	0.684	0.599	1
Ech1	0.642875	-0.505376	0.684	0.587	1
Tmem109	0.0559331	-0.272839	0.681	0.591	1
6720456B07Rik	0.0871659	-0.324643	0.681	0.619	1
Mll2	0.00305929	-0.462826	0.679	0.683	1
Rtn3	0.0891395	-0.468179	0.679	0.637	1
Arl6ip1	0.339768	-0.417099	0.678	0.62	1
Eif3c	0.0152437	-0.309074	0.676	0.592	1
Tpr	0.797511	-0.259049	0.672	0.614	1
2010107E04Rik	0.87589	-0.445455	0.671	0.581	1
Prelid1	0.324988	-0.310673	0.669	0.603	1
Ubl3	0.226571	-0.281141	0.668	0.599	1
Pomp	0.301793	-0.287534	0.664	0.596	1
Rbms1	0.223169	-0.327683	0.664	0.634	1
Ccnd2	0.44689	-0.350367	0.661	0.593	1
Kdm6b	0.00212344	-0.7277	0.657	0.649	1
Mat2a	0.801704	-0.375551	0.656	0.603	1
Ndufv2	0.231796	-0.441949	0.654	0.552	1
Capn2	0.0213353	-0.315426	0.653	0.563	1
Clta	0.0526724	-0.397748	0.649	0.595	1
Zfp207	0.00469722	-0.301906	0.646	0.559	1
Sdha	0.333284	-0.464927	0.644	0.557	1
Ndufa11	0.10666	-0.537871	0.639	0.536	1
Csnk1a1	0.595359	-0.295485	0.635	0.593	1
Sf3b1	0.108446	-0.309174	0.635	0.621	1
Macf1	0.0214431	-0.4611	0.635	0.621	1
Eif4g1	0.00431948	-0.288295	0.633	0.556	1
Fermt2	0.00144453	-0.829224	0.627	0.552	1
Ndufs5	0.000776534	-0.251731	0.621	0.488	1
Mapre1	0.534741	-0.336012	0.62	0.566	1
Ndufb3	0.244539	-0.274878	0.618	0.53	1
Ndufb6	9.00997e-05	-0.295466	0.618	0.479	1
Tnfrsf1a	0.039591	-0.433405	0.618	0.573	1
Cct7	0.981689	-0.324794	0.607	0.558	1
Ddx3x	0.000296532	-0.650956	0.606	0.609	1
Tax1bp3	0.0394314	-0.312099	0.605	0.506	1
Fxyd5	0.0465719	-0.589664	0.605	0.548	1
Mprip	0.669893	-0.595057	0.605	0.549	1
Tcn2	0.1426	-0.398451	0.604	0.567	1
Sdhc	0.482749	-0.45481	0.604	0.533	1
Gna11	0.986704	-0.484056	0.604	0.535	1
Mtap4	0.161166	-0.399668	0.601	0.546	1
Pls3	0.000712803	-0.730069	0.595	0.459	1
Vdac2	0.0752146	-0.411844	0.594	0.55	1
Mcmbp	0.347944	-0.428743	0.592	0.565	1
Pan3	0.0501114	-0.487614	0.588	0.576	1
Mtpn	0.0144581	-0.56769	0.586	0.56	1
Zbtb7a	0.77875	-0.352981	0.584	0.55	1
Ndufs2	0.17031	-0.361636	0.58	0.501	1
Dnajc8	0.0689939	-0.371599	0.579	0.565	1
Leprot	0.0102209	-0.259458	0.576	0.496	1
Sbds	0.125091	-0.335263	0.574	0.504	1
Psmd2	0.00091773	-0.254044	0.573	0.482	1
Sorbs3	0.000707969	-0.291821	0.572	0.48	1
Ewsr1	0.365039	-0.312031	0.572	0.514	1
Ap2s1	0.960401	-0.312515	0.57	0.508	1
Rab10	0.41722	-0.397832	0.57	0.51	1
Filip1l	0.000140572	-0.401734	0.567	0.462	1
Ddx17	0.129419	-0.43554	0.565	0.514	1
Rbm8a	0.546016	-0.257611	0.564	0.521	1
Ndufb5	0.3208	-0.499841	0.563	0.488	1
Strn3	0.135848	-0.378225	0.562	0.502	1
Syf2	0.044759	-0.480948	0.561	0.545	1
H2afy	0.532898	-0.324719	0.56	0.515	1
Mier1	0.00342963	-0.277631	0.559	0.482	1
Hnrnph1	0.000544454	-0.280572	0.558	0.482	1
Ndel1	0.0684133	-0.59624	0.558	0.544	1
Gnaq	0.93596	-0.438686	0.557	0.52	1
Psmc1	0.634662	-0.332374	0.555	0.517	1
Psmd4	0.569005	-0.25695	0.554	0.506	1
Rab1b	0.00862409	-0.401408	0.554	0.567	1
Rock2	0.117505	-0.365975	0.553	0.492	1
Ndufab1	0.123259	-0.639212	0.553	0.458	1
Klf4	0.70843	-0.762893	0.553	0.488	1
Arhgef12	0.425535	-0.577404	0.551	0.501	1
Ogdh	0.037541	-0.754393	0.55	0.525	1
Nars	0.000329233	-0.286438	0.546	0.459	1
Atrx	0.598458	-0.380582	0.546	0.529	1
Chmp5	0.144716	-0.510447	0.546	0.518	1
M6pr	0.679186	-0.424778	0.545	0.497	1
Top1	0.402286	-0.457355	0.544	0.514	1
Cyc1	0.00587757	-0.600956	0.544	0.514	1
Bzw1	0.00365616	-0.34408	0.542	0.454	1
Ube2v1	0.469831	-0.326033	0.54	0.495	1
BC002163	0.943106	-0.269202	0.538	0.468	1
Papola	0.489584	-0.472874	0.538	0.518	1
Ndufa12	0.97352	-0.620469	0.538	0.465	1
Idh3g	0.367558	-0.454791	0.537	0.466	1
Fkbp3	0.0932042	-0.37373	0.536	0.474	1
Stat3	0.211507	-0.314368	0.535	0.494	1
Nudt3	0.6132	-0.358738	0.532	0.485	1
Glud1	0.487527	-0.365277	0.528	0.503	1
Ccnd3	6.73708e-05	-0.595336	0.526	0.531	1
Rfk	0.618902	-0.59558	0.524	0.464	1
Nono	0.0944867	-0.306834	0.523	0.467	1
Eif4a3	0.878503	-0.349561	0.522	0.476	1
Cops6	0.764006	-0.264714	0.521	0.468	1
Pcbp2	0.349701	-0.468206	0.521	0.477	1
Hist1h2bc	0.51349	-0.398879	0.52	0.452	1
Ssh2	0.00297192	-0.645066	0.52	0.524	1
Idh3b	0.236715	-0.482479	0.518	0.484	1
Ndufs4	0.0219472	-0.282077	0.517	0.441	1
Fus	0.0098861	-0.357684	0.517	0.443	1
Camk1	0.511753	-0.394698	0.517	0.469	1
Polr2e	0.243535	-0.303995	0.516	0.46	1
Acvrl1	0.435786	-0.512922	0.516	0.451	1
Cr1l	8.44069e-05	-0.587598	0.516	0.529	1
Cwc15	0.716751	-0.33301	0.514	0.471	1
Zfand5	0.097574	-0.538192	0.513	0.5	1
Ddx24	0.262554	-0.262698	0.509	0.47	1
Dctn3	0.912349	-0.310466	0.507	0.461	1
2310036O22Rik	0.283331	-0.361396	0.507	0.496	1
Cenpb	0.0031651	-0.271934	0.506	0.438	1
Spag9	0.127312	-0.851883	0.505	0.488	1
Ablim1	0.000747473	-0.896027	0.505	0.492	1
Supt5h	0.000266445	-0.306797	0.504	0.418	1
Sdhd	0.286212	-0.38075	0.504	0.435	1
Nfe2l1	0.870305	-0.490277	0.503	0.464	1
Snx2	0.413759	-0.608838	0.503	0.454	1
Gemin7	0.0554796	-0.28436	0.501	0.435	1
Caprin1	0.00293565	-0.268165	0.5	0.431	1
Tmem160	0.224945	-0.322541	0.5	0.471	1
2010106G01Rik	0.0410951	-0.470898	0.5	0.502	1
Rbpms	0.023573	-0.615022	0.5	0.476	1
Rbm25	0.126749	-0.264685	0.499	0.463	1
Ndufs3	0.000425438	-0.27308	0.499	0.406	1
Csnk2b	0.352019	-0.332946	0.499	0.471	1
Polr2l	0.100834	-0.288684	0.498	0.441	1
Ctsh	0.9032	-1.08585	0.497	0.418	1
Rbm3	0.317975	-0.291979	0.495	0.441	1
B230219D22Rik	0.0373458	-0.542211	0.494	0.491	1
Tpp1	0.678755	-0.384227	0.493	0.459	1
Mrpl42	0.154175	-0.571805	0.493	0.412	1
Med1	0.00536493	-0.324385	0.492	0.422	1
Nipbl	0.920897	-0.458089	0.491	0.465	1
Zfhx3	6.1241e-05	-0.386324	0.489	0.39	1
4833439L19Rik	0.0461239	-0.384193	0.484	0.426	1
Ppp1cc	0.0896729	-0.260172	0.483	0.422	1
Polr2j	0.12951	-0.274313	0.483	0.422	1
Ppp2r5c	0.000934323	-0.544314	0.483	0.509	1
Mapk1	0.0201081	-0.302086	0.482	0.429	1
Aup1	0.102472	-0.369289	0.481	0.478	1
Paip1	0.226614	-0.406918	0.481	0.428	1
Uqcrc2	0.27937	-0.556104	0.48	0.442	1
Wdr89	0.000323488	0.409876	0.479	0.382	1
Zfand6	0.00632526	-0.257712	0.478	0.412	1
Aco2	0.00157378	-0.84674	0.478	0.469	1
Nol7	0.800721	-0.25624	0.474	0.461	1
Acadl	0.209453	-0.475111	0.474	0.413	1
Abi1	0.136157	-0.441901	0.472	0.415	1
D0H4S114	0.000275341	-0.352508	0.471	0.393	1
Dnaja2	0.278895	-0.361638	0.471	0.419	1
Pon2	0.775707	-0.345305	0.47	0.442	1
Neat1	0.901351	-0.599044	0.47	0.437	1
Ndufv1	0.234876	-0.520718	0.469	0.404	1
Pnrc2	0.329949	-0.371443	0.468	0.424	1
Ndufa10	0.018695	-0.41397	0.467	0.391	1
Nap1l4	0.266606	-0.340127	0.466	0.426	1
Psmb7	0.299147	-0.415222	0.466	0.428	1
Lasp1	0.143074	-0.504194	0.465	0.411	1
Tomm22	0.958904	-0.295805	0.463	0.431	1
Brd2	0.30809	-0.410667	0.463	0.455	1
Atp6v1e1	0.0356156	-0.463141	0.462	0.46	1
Mxd4	0.110696	-0.510157	0.462	0.459	1
Uqcrfs1	9.33619e-05	-0.920774	0.462	0.462	1
2400001E08Rik	0.421569	-0.329666	0.46	0.44	1
Smtn	0.751037	-0.738198	0.46	0.405	1
H2afj	0.232443	-0.378893	0.458	0.412	1
Tmbim4	0.113483	-0.393152	0.458	0.452	1
Tomm20	0.0207694	-0.511957	0.458	0.447	1
Clec2d	0.0792371	-0.562937	0.458	0.444	1
Fxc1	0.237299	-0.386294	0.457	0.444	1
Rala	0.911185	-0.280696	0.455	0.425	1
Arid5b	0.94428	-0.476683	0.454	0.427	1
Sf1	0.518621	-0.401347	0.453	0.431	1
Ano6	0.152071	-0.535784	0.453	0.446	1
Wbp11	0.00442316	-0.254667	0.452	0.381	1
Sin3b	0.298851	-0.461498	0.45	0.439	1
Pabpn1	0.193832	-0.382836	0.448	0.398	1
Ppp2r2a	0.00257292	-0.30839	0.447	0.383	1
2810407C02Rik	0.754491	-0.478637	0.447	0.426	1
Snx5	0.0336225	-0.758039	0.447	0.424	1
Inpp4a	0.267793	-0.419095	0.446	0.44	1
Ifngr2	0.101357	-0.449787	0.446	0.437	1
Gak	0.108516	-0.58324	0.446	0.43	1
Actr1a	0.759099	-0.44063	0.445	0.414	1
Idh2	0.288104	-0.497961	0.445	0.389	1
Sfpq	0.000128585	-0.560425	0.445	0.485	1
Tmpo	0.0518283	-0.383122	0.444	0.389	1
Sbno1	0.0135146	-0.366434	0.443	0.387	1
Supt4h1	0.646124	-0.343092	0.442	0.418	1
Ensa	0.0986498	-0.38178	0.439	0.389	1
Mysm1	0.000944502	-0.465541	0.438	0.357	1
Immt	0.0935413	-0.483091	0.438	0.433	1
Aurkaip1	0.320406	-0.332486	0.437	0.39	1
Stx7	0.041727	-0.446121	0.437	0.439	1
Kif1b	0.314925	-0.484746	0.437	0.431	1
Nsd1	0.280137	-0.414287	0.436	0.405	1
Pcmtd1	0.0174956	-0.334937	0.434	0.384	1
Krcc1	0.00440347	-0.352497	0.434	0.376	1
Dctn1	0.194959	-0.42366	0.434	0.427	1
Mrpl51	0.0124604	-0.251989	0.432	0.358	1
Luc7l3	0.125551	-0.268654	0.432	0.394	1
Ppp1r11	0.042252	-0.45999	0.431	0.434	1
Anapc2	0.000141822	-0.254967	0.429	0.355	1
Abcf1	0.0762703	-0.271435	0.429	0.392	1
Klf3	0.440496	-0.293268	0.429	0.408	1
Aph1a	0.287573	-0.328211	0.428	0.427	1
Pum1	0.000123042	-0.366379	0.427	0.346	1
Pdhb	0.376943	-0.646416	0.427	0.392	1
Thoc2	0.00359081	-0.308011	0.424	0.369	1
Ptbp1	0.00165845	-0.317283	0.424	0.354	1
Wwtr1	0.280659	-0.583406	0.424	0.37	1
Nrbp1	0.914538	-0.389301	0.423	0.405	1
Uba2	0.0638811	-0.566036	0.423	0.364	1
Stip1	0.633278	-0.308762	0.421	0.391	1
Map2k1	0.0453548	-0.348381	0.42	0.366	1
D14Abb1e	0.0539089	-0.39927	0.42	0.377	1
Cript	0.76602	-0.4543	0.42	0.399	1
Coro1c	0.738188	-0.441994	0.419	0.383	1
Rlim	0.174276	-0.420516	0.417	0.375	1
Plin2	0.0548596	-0.432704	0.417	0.417	1
Pkig	0.000389314	-0.71274	0.417	0.411	1
Mll1	0.0737202	-0.285251	0.414	0.374	1
Dnajb1	0.523419	-0.38351	0.414	0.383	1
Acsl5	0.630249	-0.437032	0.414	0.398	1
Cnih4	0.589912	-0.299998	0.413	0.376	1
Taf10	0.016868	-0.394117	0.412	0.423	1
Mtmr2	0.0079779	-0.726441	0.412	0.427	1
Sars	0.01883	-0.304503	0.411	0.36	1
Qdpr	0.0395847	-0.531885	0.411	0.417	1
2810403A07Rik	0.971517	-0.416844	0.41	0.386	1
Sar1b	0.380528	-0.273913	0.409	0.366	1
Prpf8	0.0334222	-0.310607	0.409	0.361	1
Mgat1	0.137806	-0.600842	0.409	0.4	1
Pdlim5	0.831134	-0.629107	0.409	0.368	1
Ssna1	0.0207387	-0.271073	0.408	0.358	1
Klf7	0.909995	-0.486609	0.408	0.38	1
Tmem140	0.0247476	-0.705316	0.408	0.387	1
Fbxw2	0.235117	-0.50731	0.407	0.4	1
Clk1	0.0257498	-0.435227	0.406	0.422	1
Stx12	0.00501866	-0.697396	0.406	0.415	1
Blvrb	0.0323698	-0.380185	0.404	0.334	1
Secisbp2l	0.108668	-0.38063	0.404	0.413	1
Srsf1	5.83182e-05	-0.349863	0.403	0.327	1
Ube2m	0.66843	-0.439346	0.403	0.375	1
Dync1h1	0.0881903	-0.480034	0.403	0.413	1
Cdc5l	0.238616	-0.281324	0.402	0.367	1
Hnrnpd	0.858595	-0.327184	0.402	0.389	1
Rad23b	0.380338	-0.49278	0.402	0.366	1
Ppp2r4	0.0302105	-0.289772	0.401	0.351	1
Ctcf	0.0018892	-0.256944	0.4	0.341	1
Hsd17b12	0.115419	-0.281895	0.4	0.356	1
Gusb	0.548548	-0.401829	0.4	0.36	1
Cs	0.237649	-0.678698	0.4	0.378	1
Zcrb1	0.0391598	-0.289993	0.399	0.345	1
2900053A13Rik	0.931752	-0.355975	0.398	0.38	1
Ifnar1	0.154866	-0.411573	0.398	0.407	1
Polr2c	0.158728	-0.317039	0.397	0.349	1
Nudcd3	0.00219529	-0.337164	0.397	0.336	1
Tceb3	0.159415	-0.357354	0.397	0.361	1
Rbck1	0.05924	-0.479541	0.397	0.406	1
Ifi35	0.528326	-0.483181	0.397	0.378	1
Crk	0.00097361	-0.78469	0.397	0.422	1
Pdcd10	0.199291	-0.542719	0.396	0.384	1
Rb1cc1	7.88613e-05	-0.289219	0.395	0.322	1
Becn1	0.191054	-0.312833	0.395	0.357	1
Mob4	0.00240424	-0.35302	0.395	0.337	1
Lta4h	0.302804	-0.385932	0.395	0.365	1
Slc25a11	0.38634	-0.408967	0.395	0.35	1
Dusp11	0.585888	-0.52622	0.395	0.386	1
Upf1	0.0905979	-0.576706	0.395	0.342	1
Timm8b	0.0583978	-0.405711	0.394	0.334	1
Nbeal1	0.0110902	-0.32087	0.392	0.339	1
Plscr3	0.00207013	-0.387328	0.392	0.31	1
0610012G03Rik	0.0132032	-0.518198	0.392	0.394	1
Dhx15	0.0260805	-0.289921	0.391	0.342	1
Khdrbs1	0.433813	-0.313331	0.391	0.363	1
Bag5	0.000966495	-0.308751	0.39	0.323	1
Rab31	0.0112542	-0.544023	0.39	0.401	1
Gtf2i	0.815087	-0.649418	0.39	0.366	1
Leprotl1	0.00929471	-0.357155	0.389	0.334	1
Bud31	0.93276	-0.372986	0.389	0.362	1
Cap1	0.591188	-0.485164	0.389	0.347	1
Gls	0.0270559	-0.4877	0.388	0.337	1
Scamp2	0.0953332	-0.501738	0.388	0.387	1
Iqsec1	0.402759	-0.630332	0.387	0.378	1
Zmiz1	0.000278603	-0.673529	0.387	0.424	1
Rps4y2	0.0681261	-0.299444	0.386	0.333	1
Got2	0.186851	-0.346185	0.386	0.345	1
Gbp2	4.79501e-05	-0.470409	0.386	0.301	1
Cux1	0.202605	-0.339021	0.385	0.346	1
Fam174a	0.0339937	-0.495397	0.385	0.386	1
Atp6v1d	0.0670075	-0.279859	0.384	0.343	1
Snap23	0.0761585	-0.465298	0.383	0.385	1
Prpf4b	0.00408112	-0.596198	0.383	0.406	1
Tsnax	0.176886	-0.777939	0.382	0.369	1
Ip6k1	0.0785865	-0.472631	0.381	0.337	1
Acadm	0.0339868	-0.527748	0.381	0.325	1
Nek7	0.220299	-0.39433	0.38	0.348	1
Smg1	0.00732542	-0.474511	0.38	0.329	1
Sertad2	0.617381	-0.487465	0.38	0.351	1
Cnot8	0.476093	-0.291796	0.379	0.357	1
Dcaf7	0.0536528	-0.593457	0.379	0.383	1
Tmem134	0.810455	-0.278293	0.378	0.358	1
Furin	0.83297	-0.500312	0.378	0.367	1
Irf2	0.0250747	-0.457309	0.377	0.386	1
Stat6	0.580655	-0.506494	0.377	0.36	1
Stk24	0.00116346	-0.260697	0.376	0.309	1
Atxn1	0.683582	-0.491721	0.376	0.366	1
Abhd12	0.17894	-0.590328	0.376	0.37	1
Wbp4	0.264021	-0.382616	0.375	0.342	1
Csnk1e	0.707611	-0.392753	0.375	0.363	1
Tnks2	0.781573	-0.346467	0.374	0.359	1
Flii	0.699634	-0.353778	0.373	0.365	1
Ubqln1	0.0520404	-0.266674	0.372	0.336	1
Pcna	0.679197	-0.384195	0.372	0.358	1
Ltbr	0.015213	-0.413343	0.372	0.311	1
Pgk1	0.706499	-0.403269	0.371	0.35	1
Chchd3	0.496743	-0.493452	0.371	0.354	1
Pum2	0.000295041	-0.685573	0.371	0.398	1
Tsc22d4	0.00246682	-0.731033	0.371	0.377	1
Dld	0.000255657	-0.328785	0.37	0.297	1
Fam96b	0.695142	-0.352752	0.37	0.347	1
Slc38a2	0.00509075	-0.548249	0.37	0.402	1
Cd2ap	0.0542204	-0.666047	0.37	0.377	1
Nck1	0.909067	-0.59708	0.369	0.345	1
Cflar	0.681278	-0.603566	0.369	0.345	1
Pcif1	0.111082	-0.294781	0.368	0.343	1
Mfap1a	0.00108777	-0.413167	0.368	0.307	1
Stim2	0.0497068	-0.482334	0.368	0.378	1
Fam63b	0.681049	-0.265048	0.366	0.366	1
Arid1a	0.00628331	-0.583802	0.366	0.396	1
Slc44a2	0.822738	-0.635772	0.366	0.344	1
Ncaph2	0.434042	-0.291853	0.365	0.344	1
Ppp3r1	0.000908961	-0.375494	0.365	0.299	1
Zmynd8	0.218467	-0.503911	0.365	0.371	1
Mrps18c	0.279551	-0.511153	0.365	0.356	1
C230081A13Rik	0.0310738	-0.533638	0.365	0.38	1
2400003C14Rik	0.344627	-0.256093	0.363	0.346	1
Mll3	0.270147	-0.398823	0.363	0.334	1
5430437P03Rik	0.95041	-0.306408	0.361	0.345	1
Pisd-ps3	0.126277	-0.473432	0.361	0.373	1
Fyn	0.0872778	-0.481311	0.361	0.318	1
Hfe	0.323376	-0.484517	0.361	0.341	1
Mknk2	0.00664107	-0.49966	0.361	0.376	1
Vps4b	0.418241	-0.532366	0.361	0.358	1
Erbb2ip	0.687115	-0.540382	0.361	0.352	1
Vcl	0.187952	-0.709319	0.361	0.351	1
Fosl2	0.0623978	-0.522979	0.36	0.316	1
U2af2	0.723255	-0.348988	0.359	0.333	1
Trip12	0.909474	-0.532867	0.359	0.342	1
Rnf4	0.20907	-0.385218	0.358	0.327	1
Syne2	0.00612121	-0.632639	0.358	0.374	1
Mrpl18	0.47687	-0.326954	0.357	0.32	1
Dars	0.15979	-0.394361	0.357	0.321	1
Lmf2	0.11574	-0.469654	0.357	0.315	1
Fxr1	0.10917	-0.501328	0.357	0.318	1
Mrpl12	0.535102	-0.488902	0.356	0.335	1
Dbnl	0.0051674	-0.540625	0.356	0.372	1
Lsm6	0.139069	-0.297258	0.355	0.318	1
Rbbp6	0.685373	-0.465259	0.355	0.35	1
Smg7	0.00334161	-0.483801	0.355	0.375	1
Ankrd17	0.00404597	-0.390463	0.354	0.299	1
Setd3	0.227573	-0.286632	0.353	0.321	1
Herc2	0.213941	-0.364678	0.353	0.328	1
Arl4a	0.012355	-0.376444	0.353	0.302	1
Ivns1abp	0.0424475	-0.636702	0.353	0.36	1
Kpnb1	0.00256117	-0.28203	0.352	0.297	1
Fam76a	0.0258241	-0.418013	0.352	0.301	1
Dock1	0.0395247	-0.420463	0.352	0.371	1
Polr2a	0.00231193	-0.554912	0.351	0.383	1
Dync1li2	0.00510931	-0.382807	0.35	0.3	1
Ctbp2	0.53216	-0.443305	0.349	0.337	1
Ssbp4	0.0138855	-0.519066	0.349	0.359	1
2020-03-05	0.496617	-0.319958	0.347	0.327	1
Sec24c	0.773413	-0.349292	0.347	0.325	1
Arhgap5	0.0852378	-0.260425	0.346	0.316	1
Rnps1	0.742329	-0.387883	0.346	0.329	1
Ctdsp1	0.848376	-0.565723	0.346	0.333	1
Per1	0.334352	-0.346404	0.345	0.346	1
Rnpep	0.0425146	-0.388548	0.345	0.354	1
Btbd1	0.215066	-0.3315	0.344	0.31	1
Mapre2	0.06674	-0.533492	0.344	0.349	1
Kpna4	0.100962	-0.438743	0.343	0.356	1
Rit1	0.195044	-0.468336	0.343	0.343	1
Pak1ip1	0.198976	-0.537885	0.343	0.345	1
Fubp1	0.0130442	-0.595239	0.343	0.358	1
Rc3h1	0.20295	-0.278394	0.341	0.316	1
Lsm14a	0.0416011	-0.326335	0.341	0.299	1
Nub1	0.836554	-0.412381	0.341	0.33	1
Mfsd1	0.0122363	-0.519504	0.341	0.36	1
Ndfip2	0.679255	-0.567669	0.341	0.322	1
Cobra1	0.0657534	-0.278063	0.34	0.303	1
2210013O21Rik	0.151425	-0.330315	0.34	0.3	1
Sun2	0.000987387	-0.428081	0.34	0.28	1
1110007C09Rik	0.00527978	-0.43853	0.34	0.359	1
Ywhag	0.176532	-0.484179	0.34	0.335	1
Lbh	0.0110992	-0.319302	0.338	0.284	1
1810026B05Rik	0.102472	-0.342634	0.338	0.305	1
Adam17	0.132409	-0.376891	0.338	0.306	1
Rasa1	0.207995	-0.647694	0.338	0.34	1
Api5	0.653425	-0.542383	0.337	0.33	1
Zdhhc20	0.105998	-0.601486	0.337	0.341	1
Mrps36	0.471742	-0.35784	0.336	0.302	1
Eci1	0.102228	-0.372083	0.336	0.292	1
Nrd1	0.227758	-0.495693	0.336	0.334	1
Jmjd1c	0.844809	-0.336751	0.335	0.33	1
Nmi	0.443589	-0.507477	0.335	0.333	1
Med10	0.673687	-0.311667	0.334	0.317	1
Dpf2	0.00947392	-0.364594	0.334	0.283	1
Tpp2	0.259702	-0.463739	0.334	0.336	1
Hmgcl	0.0926024	-0.379831	0.333	0.346	1
5133401N09Rik	0.981945	-0.326674	0.332	0.326	1
Zfp36l2	0.253138	-0.548563	0.332	0.329	1
Stk11	0.0540129	-0.312545	0.331	0.295	1
Sec11c	0.0124013	-0.378796	0.331	0.346	1
Nosip	0.22038	-0.42809	0.331	0.334	1
Arhgef2	0.149255	-0.519394	0.331	0.339	1
Esyt1	0.004579	-0.569442	0.329	0.27	1
Cdk12	0.822648	-0.602411	0.329	0.321	1
Cndp2	0.537207	-0.287071	0.328	0.304	1
Raf1	0.857931	-0.441885	0.328	0.317	1
Azi2	0.409192	-0.536375	0.328	0.328	1
Pxdn	0.00175853	-0.585211	0.328	0.268	1
Limd1	0.93753	-0.682244	0.328	0.311	1
Epn2	0.0107276	-0.861949	0.327	0.343	1
Ddx47	0.154586	-0.254735	0.326	0.297	1
Smek1	0.00684131	-0.306048	0.326	0.277	1
Arid4a	0.0152273	-0.354996	0.326	0.354	1
Atp6v1a	0.0544243	-0.50601	0.325	0.34	1
Prpf38b	0.000352564	-0.581528	0.325	0.363	1
Tardbp	0.696084	-0.397532	0.324	0.311	1
Tmem179b	0.800883	-0.394415	0.323	0.309	1
Hif1a	0.00251815	-0.557178	0.323	0.351	1
Mgrn1	0.255484	-0.359168	0.322	0.29	1
Nemf	0.249409	-0.41115	0.322	0.292	1
Fh1	0.795644	-0.496874	0.322	0.296	1
Vamp5	0.00291734	-0.720123	0.322	0.336	1
Rfc1	0.000947803	-0.303274	0.321	0.265	1
Tspan9	0.0013184	-0.86059	0.321	0.341	1
Ddx46	0.901225	-0.331488	0.32	0.311	1
Chtf8	0.612905	-0.354207	0.32	0.299	1
Irf3	0.286314	-0.395164	0.319	0.29	1
Pdzd8	0.0445592	-0.413782	0.319	0.282	1
Dbndd2	0.777317	-0.691583	0.319	0.293	1
Baz2b	0.383767	-0.389453	0.318	0.299	1
Bnip3	0.620478	-0.403886	0.318	0.295	1
2410001C21Rik	0.65509	-0.379442	0.317	0.309	1
Angel2	0.003173	-0.401853	0.317	0.263	1
Mkrn1	0.763798	-0.422181	0.317	0.31	1
Cdk9	0.0854528	-0.552408	0.317	0.321	1
Trak1	0.00220496	-0.326606	0.316	0.263	1
Usp4	0.512832	-0.51108	0.316	0.312	1
1810031K17Rik	0.164078	-0.525967	0.316	0.317	1
Gpbp1l1	0.748025	-0.557571	0.316	0.301	1
Mta2	0.0483998	-0.681548	0.316	0.325	1
Vps72	0.231722	-0.251396	0.315	0.289	1
Dnajc7	0.00789581	-0.613499	0.315	0.337	1
Asap1	0.091669	-0.501079	0.314	0.329	1
Map2k3	0.32419	-0.529988	0.314	0.313	1
Rad21	0.914092	-0.439329	0.313	0.302	1
Idh3a	0.0195045	-0.625892	0.313	0.255	1
Atp2c1	0.0298613	-0.748671	0.313	0.321	1
Prickle3	0.244856	-1.30036	0.313	0.264	1
Cotl1	0.000284142	-1.49435	0.313	0.307	1
Elf2	0.124632	-0.398905	0.312	0.277	1
Cisd1	0.0581528	-0.685955	0.312	0.26	1
2410002O22Rik	0.000854422	-0.262636	0.311	0.256	1
Dcun1d1	0.00152429	-0.262858	0.311	0.257	1
C230096C10Rik	0.117301	-0.363818	0.311	0.283	1
Slc25a12	0.00118605	-0.291651	0.31	0.25	1
Trafd1	0.0213128	-0.27674	0.309	0.27	1
Akirin1	0.8411	-0.433482	0.309	0.297	1
Ube2l6	0.164526	-0.439844	0.309	0.271	1
Ppm1g	0.794353	-0.462065	0.309	0.295	1
Map3k3	0.00258916	-0.783195	0.309	0.337	1
Dyrk1a	0.789239	-0.376064	0.308	0.296	1
BC005537	0.588461	-0.469365	0.308	0.301	1
Akirin2	0.284337	-0.312594	0.307	0.281	1
Slbp	0.9652	-0.418239	0.307	0.294	1
Cept1	0.035851	-0.583846	0.307	0.321	1
Wsb1	0.0825758	-0.762597	0.307	0.317	1
Nt5c	0.0840402	-0.282891	0.306	0.27	1
Blmh	0.00921294	-0.291742	0.306	0.258	1
Cnot2	0.000409415	-0.326752	0.306	0.252	1
Tmem93	0.00824441	-0.499788	0.306	0.328	1
Ttc35	0.199322	-0.252899	0.305	0.278	1
Ep400	0.93996	-0.465377	0.305	0.294	1
Arl2bp	0.819737	-0.607774	0.304	0.291	1
Osmr	0.349252	-0.852168	0.304	0.269	1
Msrb3	0.000122378	-0.313998	0.303	0.244	1
3110001D03Rik	0.122447	-0.317446	0.303	0.269	1
Wwc2	0.127485	-0.354279	0.303	0.272	1
Cbfb	0.000120717	-0.361963	0.303	0.24	1
Snf8	0.372001	-0.439734	0.303	0.301	1
Peli1	0.52899	-0.448335	0.303	0.303	1
Ehmt1	0.000557545	-0.291231	0.302	0.25	1
Rab8b	0.597892	-0.425795	0.302	0.281	1
Ulk2	0.758483	-0.433221	0.302	0.287	1
Taok3	0.0298675	-0.291385	0.301	0.258	1
Ndufs1	0.524521	-0.630409	0.301	0.272	1
Leng8	0.00651323	-0.822473	0.301	0.32	1
Cnp	0.401683	-0.828295	0.301	0.302	1
Tor3a	0.032574	-0.25537	0.3	0.259	1
Ubr4	0.146149	-0.293634	0.3	0.271	1
Rbm22	0.0405603	-0.318167	0.3	0.263	1
Nbr1	0.272821	-0.328144	0.3	0.307	1
Gnb4	0.000916638	-0.485879	0.3	0.237	1
Hk1	0.301631	-0.426709	0.299	0.302	1
Tab2	0.0321788	-0.498964	0.299	0.319	1
Fbxw11	0.777071	-0.464943	0.298	0.284	1
Nfkb1	0.258016	-0.59818	0.298	0.272	1
Fas	0.0200084	-0.441522	0.297	0.258	1
Shoc2	0.502069	-0.303269	0.296	0.276	1
Dnajc5	0.988166	-0.426186	0.296	0.288	1
Ate1	0.14505	-0.46063	0.296	0.263	1
Ptpn1	0.00165093	-0.575458	0.296	0.321	1
Lypla1	0.0442913	-0.697428	0.296	0.31	1
Dynll2	0.108386	-0.2724	0.295	0.255	1
1810013L24Rik	0.000240415	-0.302715	0.295	0.24	1
AI462493	0.6299	-0.35764	0.295	0.295	1
Cpne1	0.000200364	-0.407084	0.295	0.235	1
Glyr1	0.562487	-0.412679	0.295	0.282	1
Pdrg1	0.145541	-0.444494	0.295	0.297	1
D14Ertd668e	0.450319	-0.49642	0.295	0.29	1
Smad1	0.110068	-0.64478	0.295	0.301	1
Srsf4	0.145962	-0.282125	0.294	0.265	1
Pam16	0.0233217	-0.302852	0.294	0.243	1
Hras1	0.219949	-0.609058	0.294	0.291	1
Cpsf6	0.805346	-0.446102	0.293	0.279	1
Ngdn	0.23754	-0.291135	0.292	0.268	1
Cdc42ep2	0.0013242	-0.394163	0.292	0.231	1
Ubxn2a	0.101491	-0.555733	0.292	0.302	1
Ercc1	0.0600328	-0.576511	0.292	0.301	1
Tbc1d15	0.0254079	-0.355569	0.291	0.252	1
Kcmf1	0.892036	-0.403496	0.291	0.288	1
Fam114a2	0.982902	-0.461842	0.291	0.282	1
Eftud2	0.576837	-0.51873	0.291	0.27	1
Ankrd40	0.203094	-0.30346	0.29	0.263	1
Slc31a2	0.403498	-0.261974	0.289	0.267	1
Mrpl53	0.558982	-0.364003	0.289	0.262	1
Atrn	0.335459	-0.495298	0.289	0.265	1
Ube2a	0.000996766	-0.544911	0.289	0.325	1
Ppp1r15a	0.0107122	-0.698811	0.289	0.308	1
Med29	0.126608	-0.292542	0.288	0.262	1
Atxn2l	0.0886336	-0.357341	0.288	0.3	1
Ythdf1	0.000434875	-0.389962	0.288	0.229	1
Glod4	0.955931	-0.397634	0.288	0.277	1
Ccdc82	0.892705	-0.628978	0.288	0.272	1
Psmg4	0.0325117	-0.274672	0.287	0.249	1
Pik3ca	0.184929	-0.296222	0.287	0.259	1
1700025G04Rik	0.0309289	-0.32754	0.287	0.249	1
Trappc1	0.204123	-0.335933	0.287	0.26	1
Rbm27	0.0012276	-0.447889	0.287	0.236	1
Msl1	0.00435267	-0.708642	0.287	0.313	1
Myo6	0.0736251	-0.841618	0.287	0.293	1
Sirpa	0.325459	-0.967738	0.287	0.275	1
Cox4nb	0.00379408	-0.299778	0.286	0.24	1
Mrpl43	0.746825	-0.316662	0.286	0.275	1
2310046O06Rik	0.148857	-0.334842	0.286	0.258	1
Riok3	0.764542	-0.455243	0.286	0.28	1
Sacm1l	0.0102764	-0.478057	0.286	0.242	1
Tcf3	0.978263	-0.647178	0.286	0.27	1
Chd1	0.000998537	-0.698002	0.286	0.313	1
Mark3	0.177733	-0.262664	0.285	0.259	1
Stxbp3a	0.0172397	-0.540131	0.285	0.306	1
Tet2	0.0320604	-0.380759	0.284	0.246	1
Gosr2	0.467093	-0.515172	0.284	0.264	1
Ankhd1	0.868777	-0.535893	0.284	0.277	1
Acot13	0.0183333	-0.559878	0.284	0.234	1
Mdfic	0.824912	-0.57036	0.284	0.268	1
Serpinb9	0.373358	-0.681528	0.284	0.255	1
Rab4b	0.97664	-0.263045	0.283	0.276	1
Yaf2	0.0161288	-0.37898	0.283	0.241	1
Atp6v1b2	0.0137042	-0.52153	0.283	0.305	1
Mfap3	0.0379254	-0.644259	0.283	0.299	1
Isca2	0.790814	-0.343189	0.282	0.266	1
Lmo2	0.000126707	-0.300547	0.281	0.329	1
Commd7	0.805356	-0.30819	0.281	0.268	1
Azin1	0.51875	-0.520167	0.281	0.283	1
1300014I06Rik	0.0368365	-0.63399	0.281	0.293	1
Fbxo3	0.0980348	-0.340178	0.28	0.249	1
Prr14	0.303352	-0.519251	0.28	0.254	1
Mark2	0.0121673	-0.656649	0.28	0.299	1
Vta1	0.24753	-0.349508	0.279	0.254	1
Phf5a	0.234962	-0.419258	0.279	0.285	1
Ccnt1	9.5169e-05	-0.314764	0.278	0.22	1
Nup88	0.803391	-0.279237	0.277	0.274	1
Zcchc11	0.19134	-0.294185	0.277	0.253	1
Larp4	0.751318	-0.321257	0.277	0.265	1
Sltm	0.899132	-0.401748	0.277	0.27	1
Map2k4	0.685821	-0.599115	0.277	0.27	1
Psme4	0.512026	-0.669116	0.277	0.255	1
Tomm70a	0.252547	-0.317446	0.276	0.256	1
Vps36	0.364699	-0.504246	0.276	0.275	1
Smek2	0.00317486	-0.748516	0.276	0.304	1
Lsm2	0.0780894	-0.274986	0.275	0.241	1
Wapal	0.028374	-0.442647	0.274	0.299	1
Ahctf1	0.00780784	-0.459031	0.274	0.23	1
Gnpat	0.680031	-0.48337	0.274	0.259	1
2610507B11Rik	0.000395498	-0.484882	0.274	0.313	1
Gsr	0.040902	-0.502211	0.274	0.235	1
Mob2	0.000447279	-0.596307	0.274	0.309	1
Slain2	0.285871	-0.665663	0.274	0.275	1
Crat	0.000267604	-0.291412	0.273	0.213	1
Mrpl34	0.12155	-0.395738	0.273	0.282	1
Pxk	0.257693	-0.399191	0.273	0.284	1
Mbd2	0.637629	-0.473876	0.273	0.27	1
Chordc1	0.870325	-0.529002	0.273	0.261	1
Atp2b4	0.0485848	-0.772104	0.273	0.232	1
Zdhhc5	0.000161843	-0.26811	0.272	0.213	1
Sh3kbp1	0.486126	-0.450442	0.272	0.269	1
Zfc3h1	0.00267094	-0.258267	0.271	0.227	1
Sart1	0.330513	-0.271069	0.271	0.252	1
Sike1	0.905393	-0.367527	0.271	0.261	1
Chmp1b	0.465676	-0.442096	0.271	0.25	1
Pcf11	0.0987018	-0.292462	0.269	0.24	1
Ubp1	0.0018626	-0.324654	0.269	0.224	1
Ube2g1	0.960177	-0.361642	0.269	0.259	1
Sec24b	0.544512	-0.366272	0.269	0.255	1
Brox	0.660842	-0.606944	0.269	0.264	1
Wwp1	0.279443	-0.713918	0.269	0.266	1
Hspa1a	0.101562	-1.42889	0.269	0.231	1
Rnf216	0.192364	-0.368495	0.268	0.28	1
Luc7l	0.0188174	-0.407383	0.268	0.23	1
Rsbn1l	0.513331	-0.481808	0.268	0.268	1
Rusc2	0.80391	-0.660208	0.268	0.258	1
B3gnt2	0.405971	-0.678631	0.268	0.263	1
Cgnl1	0.00403201	-0.745046	0.268	0.215	1
Seh1l	0.0140347	-0.32877	0.267	0.224	1
Hivep2	0.740025	-0.361916	0.267	0.257	1
Tmem50b	0.571852	-0.398333	0.267	0.265	1
Fbxo22	0.0360738	-0.421862	0.267	0.231	1
Nek9	0.976598	-0.529497	0.267	0.257	1
Tufm	0.0773768	-0.263829	0.266	0.233	1
Smchd1	0.741037	-0.274871	0.266	0.255	1
Ccnl2	0.31434	-0.328013	0.266	0.275	1
Slc30a9	0.00610078	-0.424473	0.266	0.22	1
Znfx1	0.212178	-0.546566	0.266	0.241	1
Rnf144a	0.396185	-0.92927	0.266	0.257	1
Fbxl5	0.0601939	-0.268556	0.265	0.237	1
Ckap5	0.000245043	-0.276254	0.265	0.213	1
Xab2	0.000122244	-0.301002	0.265	0.207	1
Sbf2	0.228065	-0.377973	0.265	0.276	1
Rnf20	0.818954	-0.424308	0.265	0.255	1
Irgm1	0.000447231	-0.756578	0.265	0.3	1
Tpra1	0.368648	-0.422527	0.264	0.269	1
Brd1	0.255192	-0.378608	0.263	0.244	1
Fam168b	0.171193	-0.408826	0.263	0.239	1
Dlat	0.057171	-0.513982	0.263	0.222	1
Tox4	0.0298005	-0.357175	0.262	0.231	1
Fam129b	0.0344023	-0.417495	0.262	0.224	1
Smurf2	0.101331	-0.43768	0.262	0.234	1
2310008H09Rik	0.843184	-0.446129	0.262	0.253	1
Irf9	0.435134	-0.455859	0.262	0.263	1
Mllt6	0.0249822	-0.588468	0.262	0.282	1
Ncoa4	0.0036973	-0.290004	0.261	0.214	1
Tep1	0.000605027	-0.396024	0.261	0.206	1
Exosc10	0.105885	-0.40377	0.261	0.28	1
Prdm2	0.882854	-0.412825	0.261	0.26	1
Mafg	7.89908e-05	-0.289986	0.26	0.203	1
Ccz1	0.00809794	-0.476567	0.26	0.218	1
Sun1	0.0380646	-0.492552	0.26	0.223	1
Mafb	0.724377	-1.08937	0.26	0.239	1
Paqr4	0.00563147	-0.403007	0.259	0.215	1
Fam82b	0.410313	-0.382328	0.258	0.237	1
Arl5b	0.0666707	-0.541549	0.258	0.22	1
Pgd	0.0429483	-0.534455	0.257	0.272	1
Edem1	0.435922	-0.278699	0.256	0.241	1
Tmtc1	0.0137325	-0.443815	0.256	0.215	1
Wdfy3	0.000858436	-0.558401	0.256	0.291	1
Bag6	0.106717	-0.624144	0.256	0.268	1
Usp47	0.0136091	-0.356539	0.255	0.217	1
Gmfb	0.524105	-0.392297	0.255	0.244	1
Brwd1	0.0065358	-0.453876	0.255	0.211	1
Strn4	0.000244846	-0.79485	0.255	0.292	1
Dohh	0.997416	-0.376579	0.254	0.246	1
Zfp422	0.136231	-0.495419	0.254	0.227	1
Ak2	0.00253771	-0.564158	0.254	0.288	1
Dcdc2b	0.280137	-0.25989	0.253	0.232	1
Tsc22d2	0.104754	-0.280182	0.253	0.226	1
Trim12c	0.64746	-0.532243	0.253	0.251	1
Slc25a46	0.139014	-0.272969	0.252	0.228	1
Fnip1	0.0178045	-0.332045	0.252	0.212	1
Ddx21	0.126509	-0.424809	0.252	0.226	1
Cdc34	0.752471	-0.464392	0.252	0.236	1
Ctdnep1	0.00401849	-0.50659	0.252	0.278	1
Mafk	0.466205	-0.533581	0.252	0.233	1
Pptc7	0.108114	-0.669002	0.252	0.261	1
Abca1	0.0181697	-0.280936	0.251	0.213	1
Ldb1	0.540248	-0.385561	0.251	0.235	1
Zcchc8	0.892968	-0.393849	0.251	0.244	1
A230046K03Rik	0.104513	-0.567439	0.251	0.267	1
Hcfc1	0.988719	-0.609789	0.251	0.244	1
Fnbp1	0.0410596	-0.836949	0.251	0.264	1
Ifih1	0.0797741	-0.570966	0.247	0.263	1
Trappc5	0.234223	-0.444065	0.245	0.255	1
Hiat1	0.000287172	-0.723708	0.245	0.282	1
Sp110	0.000917382	-0.577885	0.244	0.28	1
Cib1	0.0965958	-0.497944	0.243	0.256	1
Dtx3l	0.0675947	-0.637669	0.242	0.26	1
Zfp664	0.0170215	-0.759601	0.242	0.263	1
Gna13	0.201509	-0.322377	0.24	0.252	1
Pip4k2a	0.0478846	-0.58899	0.24	0.252	1
Ep300	7.34396e-05	-0.689799	0.24	0.281	1
Ppp6r3	0.117071	-0.675682	0.239	0.251	1
D17Wsu92e	0.0327382	-0.489074	0.238	0.259	1
Prkacb	0.00092331	-0.739341	0.236	0.268	1
4933426M11Rik	0.0121399	-0.761767	0.236	0.259	1
Akap8	0.0678253	-0.496779	0.233	0.253	1
BC003266	0.000596932	-0.552899	0.232	0.268	1
Trnau1ap	0.000170336	-0.636116	0.231	0.27	1
E030024N20Rik	0.000388801	-0.639821	0.229	0.259	1
Rnf115	0.00018522	-0.685912	0.228	0.266	1
Tmem128	6.57014e-05	-0.731101	0.228	0.267	1
Rbfa	0.000199964	-0.476621	0.225	0.27	1
Ogfr	0.00758377	-0.623666	0.225	0.251	1
Lypla2	0.0040997	-0.437798	0.224	0.253	1
Ddx54	0.00104389	-0.773421	0.224	0.255	1
Mdm2	0.000773117	-0.578194	0.221	0.258	1
Phactr4	6.63772e-05	-0.786639	0.219	0.262	1
Setx	0.00146692	-0.731672	0.216	0.252	1
Asap2	4.20747e-05	-0.843826	0.234	0.273	0.982067
Trim8	4.19429e-05	-0.26281	0.436	0.354	0.978989
Pepd	3.64577e-05	-0.855206	0.216	0.256	0.85096
Ubn2	3.56756e-05	-0.304285	0.419	0.346	0.832704
Triobp	3.2089e-05	-0.871308	0.349	0.381	0.748989
Pdcd6ip	3.13285e-05	-0.747398	0.444	0.464	0.731238
Xdh	3.08289e-05	-0.472798	0.598	0.478	0.719578
Chchd2	3.06024e-05	-0.271524	0.92	0.852	0.714291
Cxx1b	2.87362e-05	-0.794253	0.292	0.325	0.670731
Myadm	2.78652e-05	-0.567477	0.917	0.838	0.650402
Pear1	2.65891e-05	-0.568998	0.271	0.202	0.620615
Rras	2.55263e-05	-0.522378	0.673	0.628	0.595809
Coro1b	2.53511e-05	-0.533958	0.609	0.581	0.591719
Ptrf	2.49685e-05	-0.706869	0.983	0.789	0.58279
Npr1	2.38963e-05	-0.317238	0.258	0.2	0.557763
Ndufc2	2.20268e-05	-0.51745	0.662	0.622	0.514127
Jag1	2.1673e-05	-0.585645	0.41	0.321	0.505868
Rgs3	2.00396e-05	-1.11524	0.23	0.276	0.467745
Pacsin2	1.68386e-05	-0.699512	0.346	0.381	0.393031
Sppl3	1.63419e-05	-0.265559	0.42	0.338	0.381437
Hiatl1	1.58607e-05	-0.323563	0.346	0.272	0.370204
Dhx30	1.4974e-05	-0.251156	0.291	0.227	0.349508
6820431F20Rik	1.477e-05	-0.623745	0.299	0.226	0.344747
Irf1	1.45054e-05	-0.866109	0.342	0.376	0.338571
Kdm5a	1.4504e-05	-0.358037	0.387	0.31	0.338537
Trf	1.38094e-05	-0.710756	0.673	0.583	0.322325
Reep3	1.19856e-05	-0.778289	0.55	0.561	0.279757
Raly	1.1323e-05	-0.49579	0.594	0.584	0.26429
Trp53inp2	1.02998e-05	-1.03174	0.216	0.257	0.240408
Larp4b	9.95322e-06	-0.775487	0.269	0.32	0.232318
Ap1s2	9.94167e-06	-0.709022	0.253	0.296	0.232049
Lrp6	8.98221e-06	-0.275146	0.335	0.265	0.209654
Wdr26	8.95088e-06	-0.618619	0.336	0.385	0.208923
Atp2b1	8.0279e-06	-0.567158	0.564	0.562	0.187379
Gdi2	6.78321e-06	-0.464988	0.77	0.715	0.158327
Zfp445	6.51896e-06	-0.290373	0.27	0.204	0.152159
Aldh3a2	6.42846e-06	-0.428723	0.299	0.224	0.150047
Ehd2	6.31372e-06	-0.934343	0.748	0.611	0.147368
Cyba	5.85799e-06	-0.611582	0.809	0.691	0.136731
Tmem184b	5.7864e-06	-0.979228	0.341	0.38	0.13506
Pop5	5.12375e-06	-0.512508	0.237	0.285	0.119594
Cebpg	4.78198e-06	-0.595319	0.445	0.485	0.111616
Stk38l	4.41554e-06	-0.315391	0.295	0.224	0.103063
Gigyf1	4.24085e-06	-0.382571	0.359	0.28	0.0989858
Gapvd1	4.02688e-06	-0.654048	0.207	0.263	0.0939915
Fbxl3	3.78255e-06	-0.395613	0.351	0.275	0.0882886
Kdm1a	3.46831e-06	-0.296892	0.314	0.243	0.0809537
Ndufc1	3.43636e-06	-0.371049	0.685	0.533	0.080208
Cox7c	3.32376e-06	-0.537625	0.845	0.79	0.0775798
Hmg20b	3.22572e-06	-0.62294	0.26	0.313	0.0752916
Vdac1	3.08161e-06	-0.337657	0.521	0.408	0.0719278
Arhgef7	2.85951e-06	-0.597301	0.214	0.268	0.0667438
Asah1	2.46039e-06	-0.274337	0.642	0.497	0.057428
Dnaja3	2.44501e-06	-0.277423	0.338	0.262	0.0570689
Pafah1b1	2.27008e-06	-0.276281	0.573	0.468	0.0529859
Akt1	2.25166e-06	-0.641567	0.423	0.464	0.052556
Tek	2.15606e-06	-0.970426	0.395	0.42	0.0503246
Tmem14c	1.99537e-06	-0.518488	0.473	0.493	0.046574
Tcf20	1.99424e-06	-0.265272	0.323	0.251	0.0465476
Tspan6	1.94796e-06	-1.19578	0.24	0.275	0.0454674
Lipa	1.92548e-06	-0.742377	0.443	0.461	0.0449426
Nppa	1.89721e-06	-3.52022	0.208	0.253	0.0442827
Fam162a	1.80756e-06	-0.512141	0.499	0.366	0.0421903
Hint2	1.76706e-06	-0.789712	0.223	0.265	0.0412448
Fau	1.72655e-06	-0.275136	0.95	0.883	0.0402995
Sod2	1.68564e-06	-0.903493	0.423	0.445	0.0393445
Tspan4	1.6245e-06	-0.72488	0.348	0.383	0.0379174
Rap1a	1.4517e-06	-0.517497	0.517	0.535	0.0338841
Kif1c	1.33672e-06	-0.970717	0.226	0.273	0.0312004
Kctd10	1.27591e-06	-1.03916	0.358	0.376	0.029781
Iqgap1	1.23552e-06	-0.524025	0.848	0.772	0.0288382
Vwa5a	1.09877e-06	-0.265355	0.325	0.245	0.0256464
Srsf2	1.09548e-06	-0.526958	0.816	0.782	0.0255696
Atf3	1.05834e-06	-0.80818	0.269	0.316	0.0247027
Taok2	1.04782e-06	-0.827742	0.265	0.316	0.0244573
Rock1	1.03503e-06	-0.678106	0.663	0.66	0.0241586
Dlc1	1.02417e-06	-0.715018	0.433	0.476	0.0239052
1810037I17Rik	9.16926e-07	-0.455567	0.6	0.593	0.021402
Mlxip	8.93543e-07	-0.724901	0.245	0.3	0.0208562
Nutf2	8.8815e-07	-0.253398	0.409	0.314	0.0207303
H2-T23	8.45766e-07	-0.490658	0.679	0.663	0.019741
Ndufs8	7.9552e-07	-0.591863	0.523	0.53	0.0185682
Capza1	7.72701e-07	-0.720181	0.452	0.484	0.0180356
Taldo1	7.60021e-07	-0.508024	0.555	0.564	0.0177396
Hadhb	7.54912e-07	-0.431918	0.568	0.431	0.0176204
Celf1	6.58541e-07	-0.820094	0.264	0.32	0.015371
Ppp4c	6.47857e-07	-0.463759	0.419	0.461	0.0151216
Fkbp1a	6.30577e-07	-0.432933	0.899	0.835	0.0147183
Arglu1	6.11715e-07	-0.527161	0.914	0.866	0.014278
Cd82	6.10888e-07	-0.501881	0.213	0.272	0.0142587
Phf20l1	5.94609e-07	-0.641649	0.312	0.374	0.0138788
Son	5.91403e-07	-0.416559	0.89	0.849	0.0138039
Pkn2	5.68777e-07	-0.277535	0.483	0.385	0.0132758
Sp1	4.63859e-07	-0.257823	0.342	0.261	0.0108269
Fam96a	4.57121e-07	-0.519454	0.277	0.336	0.0106697
Slk	4.09236e-07	-0.741599	0.292	0.347	0.00955198
Bax	4.00186e-07	-0.765305	0.43	0.451	0.00934074
4930523C07Rik	3.87531e-07	-0.405299	0.571	0.437	0.00904536
Mapkapk2	3.65432e-07	-0.809205	0.246	0.298	0.00852955
Herc1	3.38134e-07	-0.764199	0.241	0.301	0.00789239
Etfb	3.3705e-07	-0.333149	0.657	0.509	0.00786708
Osbpl8	3.267e-07	-0.76477	0.215	0.272	0.00762552
Ppp1cb	3.11014e-07	-0.328683	0.597	0.48	0.00725938
Tmx1	2.98714e-07	-0.29257	0.455	0.354	0.00697229
3110003A17Rik	2.42387e-07	-0.638295	0.298	0.356	0.00565754
Cmtm6	2.3259e-07	-0.884174	0.37	0.41	0.00542887
Hnrnpa3	2.26951e-07	-0.272082	0.517	0.415	0.00529726
Oaz2	2.26932e-07	-0.830889	0.561	0.54	0.00529681
Tcf4	1.95718e-07	-0.554522	0.905	0.852	0.00456825
Sik1	1.76567e-07	-0.84083	0.437	0.463	0.00412126
Sh3glb2	1.74069e-07	-0.968791	0.227	0.282	0.00406294
Polr1d	1.44203e-07	-0.598749	0.499	0.517	0.00336584
Ttc28	1.31396e-07	-0.27858	0.299	0.221	0.00306692
Atp6v0b	1.26966e-07	-0.559173	0.637	0.618	0.00296352
Nras	1.26847e-07	-0.728341	0.571	0.591	0.00296075
Apc	1.223e-07	-0.746566	0.276	0.339	0.00285461
Trex1	9.71342e-08	-0.978693	0.196	0.252	0.00226721
Ccng1	9.4527e-08	-0.391906	0.354	0.254	0.00220635
Purb	8.66331e-08	-0.810629	0.361	0.423	0.0020221
Rab5c	8.52507e-08	-0.648459	0.479	0.494	0.00198984
Mtap7d1	7.66616e-08	-0.699069	0.463	0.495	0.00178936
Cyfip1	6.27977e-08	-0.766289	0.462	0.49	0.00146576
Srgap2	6.16104e-08	-0.765285	0.196	0.259	0.00143805
Npepl1	5.23361e-08	-0.648028	0.194	0.258	0.00122158
Slc12a6	5.1522e-08	-0.54958	0.202	0.267	0.00120257
Mob1a	4.43749e-08	-0.779479	0.368	0.414	0.00103575
Map4k4	3.72026e-08	-0.369541	0.498	0.384	0.000868346
Gnb1	3.43541e-08	-0.266342	0.989	0.956	0.000801859
Tjp1	3.20785e-08	-1.17671	0.315	0.361	0.000748745
Ppp1r12a	3.1158e-08	-0.740407	0.412	0.473	0.000727259
Prickle1	2.77732e-08	-0.51278	0.257	0.179	0.000648254
S100a16	2.55956e-08	-0.291384	0.823	0.579	0.000597427
Cited2	2.50467e-08	-0.707248	0.216	0.279	0.000584615
Wars	2.33171e-08	-1.04813	0.198	0.26	0.000544244
Ccny	2.20274e-08	-0.855698	0.286	0.346	0.000514141
Flna	2.18195e-08	-0.279468	0.517	0.399	0.00050929
Dcaf6	2.14392e-08	-0.273321	0.266	0.187	0.000500412
Nfkbiz	2.09829e-08	-0.356259	0.358	0.265	0.000489762
Cdkn1c	2.06064e-08	-1.11245	0.421	0.438	0.000480975
Atp5e	2.05559e-08	-0.485945	0.833	0.777	0.000479796
Gcap14	1.94262e-08	-0.28277	0.476	0.358	0.000453428
Ctnnd1	1.8769e-08	-0.742938	0.31	0.378	0.000438088
Ttc14	1.81677e-08	-0.347269	0.337	0.246	0.000424052
Prex2	1.81248e-08	-1.04448	0.33	0.387	0.000423051
Pten	1.8068e-08	-0.251369	0.551	0.432	0.000421724
Elf1	1.46746e-08	-0.806721	0.363	0.428	0.00034252
Arnt	1.33515e-08	-0.25343	0.36	0.268	0.000311638
Rgs10	1.10641e-08	-1.28172	0.212	0.261	0.000258247
Nfatc1	1.08932e-08	-0.649971	0.219	0.289	0.000254258
Tagln2	9.59545e-09	-0.251129	0.892	0.837	0.000223967
Ssu72	8.73408e-09	-0.545646	0.469	0.52	0.000203862
Rnpepl1	8.44329e-09	-0.744803	0.297	0.362	0.000197075
Rgs2	8.08091e-09	-0.252744	0.217	0.284	0.000188617
G3bp2	7.48579e-09	-0.722487	0.395	0.447	0.000174726
Bcl10	7.04472e-09	-0.763014	0.321	0.387	0.000164431
Brd9	6.95863e-09	-0.284744	0.432	0.33	0.000162421
Ric8	6.78686e-09	-0.256866	0.31	0.22	0.000158412
Nus1	5.78329e-09	-1.07341	0.243	0.305	0.000134988
Mcc	5.13034e-09	-1.3082	0.212	0.271	0.000119747
Cab39	4.9513e-09	-0.827931	0.31	0.371	0.000115568
Fam36a	4.35605e-09	-0.310702	0.494	0.37	0.000101675
Cdc42ep1	3.27022e-09	-0.965393	0.467	0.47	7.63303e-05
Nop58	2.69278e-09	0.301429	0.367	0.285	6.28521e-05
Dennd5a	2.45904e-09	-0.719501	0.338	0.406	5.73965e-05
Cmpk1	2.37603e-09	-0.821323	0.324	0.385	5.5459e-05
Eml1	2.25717e-09	-0.421171	0.323	0.227	5.26845e-05
Cdc42bpa	1.86604e-09	-0.361772	0.419	0.307	4.35553e-05
Ncoa3	1.48872e-09	-0.58432	0.672	0.686	3.47482e-05
Rhog	1.32823e-09	-0.781876	0.468	0.488	3.10023e-05
Tmem176b	1.30962e-09	-0.652076	0.504	0.536	3.05679e-05
Ndufa3	1.26389e-09	-0.538713	0.798	0.745	2.95004e-05
Psmb10	9.90298e-10	-0.601675	0.514	0.544	2.31146e-05
Nedd9	8.37651e-10	-1.04083	0.216	0.285	1.95516e-05
Rassf1	8.02615e-10	-0.837118	0.28	0.353	1.87338e-05
Dnm2	7.01814e-10	-0.789518	0.426	0.476	1.6381e-05
Pltp	6.89024e-10	-1.26891	0.462	0.47	1.60825e-05
Cpd	6.29551e-10	-0.955163	0.233	0.305	1.46944e-05
Btbd3	5.69918e-10	-1.23997	0.193	0.259	1.33025e-05
Lims1	5.44229e-10	-0.762389	0.459	0.499	1.27028e-05
Dst	5.25329e-10	-0.478047	0.694	0.528	1.22617e-05
Inpp5k	4.96709e-10	-0.810329	0.218	0.289	1.15937e-05
Ptk2	4.26031e-10	-1.10982	0.192	0.262	9.94399e-06
Cxx1a	2.93673e-10	-0.956362	0.265	0.324	6.85462e-06
Rdx	2.71351e-10	-0.332568	0.78	0.619	6.3336e-06
Foxp1	2.53021e-10	-0.753858	0.566	0.595	5.90577e-06
Specc1l	2.46569e-10	0.343433	0.318	0.233	5.75517e-06
Pak2	2.46265e-10	-0.83621	0.382	0.444	5.74807e-06
Cox5b	2.24719e-10	-0.671289	0.786	0.741	5.24516e-06
Ywhaz	2.19386e-10	-0.29593	0.964	0.929	5.12068e-06
Blvra	1.89536e-10	-0.842912	0.185	0.258	4.42395e-06
Phactr2	1.73965e-10	-0.825429	0.485	0.537	4.06052e-06
Tap2	1.6275e-10	-0.814197	0.418	0.465	3.79874e-06
Hspg2	1.44014e-10	-0.342346	0.594	0.454	3.36142e-06
Prr13	1.40207e-10	-0.569467	0.647	0.647	3.27258e-06
Bicd2	1.35733e-10	-0.985982	0.252	0.325	3.16814e-06
Gatad2a	1.25682e-10	-0.843638	0.312	0.389	2.93354e-06
Tmem123	1.18092e-10	-0.879188	0.485	0.535	2.75639e-06
Xaf1	1.11557e-10	-0.705843	0.309	0.379	2.60385e-06
Tuba1c	1.10059e-10	-0.641339	0.841	0.633	2.56888e-06
Mkl2	9.101e-11	-0.75894	0.297	0.376	2.12426e-06
Cdipt	8.56093e-11	-0.855935	0.321	0.393	1.99821e-06
Midn	5.85941e-11	-0.728107	0.38	0.442	1.36764e-06
Tmed5	5.25208e-11	-0.791135	0.39	0.456	1.22589e-06
Ypel5	4.19022e-11	-0.807538	0.341	0.412	9.7804e-07
Ralgapa1	4.0787e-11	-0.992052	0.257	0.336	9.5201e-07
Cltb	4.02426e-11	-0.912133	0.487	0.52	9.39301e-07
Ptpn12	3.75292e-11	-1.04122	0.18	0.255	8.75969e-07
Dusp1	3.6432e-11	-0.447848	0.91	0.891	8.50359e-07
2020-09-10	3.33538e-11	-0.325655	0.44	0.32	7.7851e-07
Hdac7	3.23873e-11	-1.08956	0.292	0.361	7.55952e-07
1700020I14Rik	3.18132e-11	-0.771221	0.297	0.376	7.42551e-07
Calcrl	2.45707e-11	-0.874655	0.352	0.417	5.73504e-07
Fzd4	2.30444e-11	-1.22655	0.237	0.302	5.37878e-07
Cycs	2.26491e-11	-1.02832	0.573	0.57	5.28652e-07
Pnkd	2.1891e-11	-1.29909	0.37	0.418	5.10957e-07
Rtp4	1.86414e-11	-0.855672	0.251	0.321	4.35109e-07
Usp25	1.82679e-11	-0.791902	0.282	0.365	4.2639e-07
Cox7a2	1.67646e-11	-0.611156	0.777	0.742	3.91302e-07
Hipk1	1.2455e-11	-0.790414	0.331	0.413	2.90713e-07
Pde4dip	8.72389e-12	-0.517622	0.265	0.165	2.03624e-07
Slc3a2	8.49413e-12	-0.819548	0.491	0.532	1.98261e-07
Cox17	8.06545e-12	-0.632563	0.611	0.605	1.88256e-07
Marcks	6.94319e-12	-0.652333	0.822	0.77	1.62061e-07
Cox6c	5.80048e-12	-0.584963	0.908	0.855	1.35389e-07
Ppp1r2	5.35535e-12	-0.856761	0.647	0.642	1.24999e-07
Hars	4.97563e-12	0.293289	0.31	0.218	1.16136e-07
Ubl5	4.66835e-12	-0.473655	0.704	0.691	1.08964e-07
Rpl29	4.5352e-12	-0.397131	0.804	0.779	1.05856e-07
Wasf2	4.19491e-12	-0.560945	0.709	0.704	9.79135e-08
Cyp2d22	3.68785e-12	-0.325133	0.38	0.264	8.6078e-08
Cyb5r3	2.87816e-12	-0.647726	0.642	0.665	6.71792e-08
Rftn1	2.75168e-12	-1.11354	0.307	0.378	6.42269e-08
Xiap	2.66843e-12	-0.776338	0.393	0.483	6.22838e-08
Smarca4	2.62391e-12	-0.667214	0.227	0.318	6.12447e-08
Zcchc6	2.49017e-12	-0.810798	0.242	0.326	5.8123e-08
Ndufa4	2.25143e-12	-0.805769	0.798	0.723	5.25507e-08
Shfm1	2.15412e-12	-0.356337	0.878	0.811	5.02793e-08
5730494N06Rik	2.1164e-12	0.282594	0.264	0.177	4.93989e-08
Mdh1	1.94336e-12	-0.511924	0.707	0.54	4.536e-08
Synj1	1.45558e-12	-0.703027	0.178	0.261	3.39746e-08
Cxcl12	1.37335e-12	-1.13869	0.664	0.608	3.20553e-08
Rap1b	9.75491e-13	-0.58111	0.763	0.73	2.27689e-08
Eif2a	9.36271e-13	0.278216	0.292	0.201	2.18535e-08
Kbtbd2	8.50917e-13	-1.0782	0.191	0.271	1.98613e-08
Spna2	8.00698e-13	-0.886453	0.491	0.552	1.86891e-08
Fcho2	6.08017e-13	-0.931904	0.361	0.436	1.41917e-08
Inpp5a	5.48867e-13	-1.11838	0.258	0.335	1.28111e-08
Myo9a	4.96932e-13	0.305699	0.283	0.195	1.15989e-08
Vash1	4.39444e-13	-0.398953	0.251	0.154	1.02571e-08
Klhl24	4.22658e-13	-0.872919	0.416	0.489	9.86525e-09
9430020K01Rik	3.80462e-13	-1.34235	0.361	0.413	8.88036e-09
Bnip2	3.06857e-13	-0.717406	0.555	0.594	7.16235e-09
Timm17b	2.70141e-13	0.34274	0.353	0.248	6.30537e-09
Mapk14	2.63617e-13	-0.876706	0.196	0.283	6.1531e-09
Atn1	2.60028e-13	0.278686	0.271	0.179	6.06932e-09
Kctd17	1.73594e-13	-0.463335	0.273	0.169	4.05186e-09
Gpi1	1.59666e-13	-0.589579	0.605	0.63	3.72678e-09
Eif4g2	1.52749e-13	-0.711366	0.707	0.721	3.56531e-09
Adh1	1.18155e-13	-0.577032	0.213	0.298	2.75785e-09
Adamts1	1.05005e-13	-0.282858	0.516	0.37	2.45092e-09
P2ry12	1.04689e-13	-2.24122	0.322	0.376	2.44354e-09
Icam1	1.02896e-13	-0.258579	0.386	0.268	2.40169e-09
St3gal1	1.01639e-13	-0.839899	0.169	0.258	2.37236e-09
Arhgdia	9.92168e-14	-0.339429	0.868	0.804	2.31582e-09
Man2b1	6.81472e-14	-1.39259	0.325	0.383	1.59062e-09
Ndufb2	5.94031e-14	-0.259936	0.632	0.451	1.38653e-09
Rbm39	5.90377e-14	-0.45842	0.899	0.862	1.378e-09
Anp32a	5.70204e-14	-0.62662	0.671	0.696	1.33091e-09
Dleu2	5.65399e-14	-0.603562	0.204	0.307	1.3197e-09
Nt5c2	5.55023e-14	0.392325	0.262	0.17	1.29548e-09
Flywch1	5.54899e-14	0.28998	0.292	0.2	1.29519e-09
Itsn2	4.25865e-14	-0.798041	0.318	0.406	9.94012e-10
Actr2	2.93706e-14	-0.511666	0.895	0.848	6.8554e-10
Mapk3	2.58218e-14	-0.842311	0.482	0.546	6.02706e-10
Bola1	2.26477e-14	0.26308	0.256	0.162	5.28619e-10
Rnf114	2.07234e-14	-0.998146	0.296	0.383	4.83704e-10
Prkx	1.94226e-14	-1.06016	0.184	0.272	4.53344e-10
Stx4a	1.77758e-14	0.313979	0.403	0.299	4.14904e-10
Lats2	1.71399e-14	-0.946916	0.379	0.457	4.00062e-10
Amz2	1.65988e-14	0.349528	0.282	0.187	3.87432e-10
Atp5g2	1.54394e-14	-0.61276	0.629	0.618	3.60372e-10
Uqcrb	1.28664e-14	-0.554434	0.827	0.786	3.00314e-10
Necap2	1.25484e-14	-0.946018	0.248	0.329	2.92892e-10
Wnk1	1.13151e-14	-0.840386	0.604	0.636	2.64105e-10
Lpgat1	1.04757e-14	0.26131	0.299	0.199	2.44513e-10
Arpc5	9.41764e-15	-0.597055	0.761	0.717	2.19817e-10
Jhdm1d	7.79172e-15	-1.00773	0.23	0.322	1.81866e-10
Ppp1ca	6.84001e-15	-0.397914	0.828	0.785	1.59653e-10
Cdkn1a	6.42091e-15	-0.687466	0.655	0.674	1.4987e-10
Fam133b	5.72117e-15	0.336268	0.271	0.171	1.33538e-10
Uba52	4.08645e-15	-0.277482	0.959	0.906	9.53818e-11
Ninj1	3.85988e-15	-1.18092	0.247	0.332	9.00935e-11
Plxna2	3.31381e-15	-1.3539	0.161	0.251	7.73475e-11
Nqo2	3.01404e-15	0.322676	0.252	0.155	7.03508e-11
Ilf3	2.45895e-15	0.293978	0.378	0.268	5.73942e-11
Hdac3	2.2895e-15	0.268467	0.287	0.186	5.34392e-11
Uaca	1.8352e-15	-1.35102	0.199	0.288	4.28353e-11
S100a13	1.69885e-15	-0.679357	0.653	0.667	3.96529e-11
Etv1	1.61618e-15	0.393355	0.263	0.165	3.77232e-11
Commd10	1.35696e-15	0.267275	0.287	0.184	3.16727e-11
Ndufb7	1.35681e-15	-0.683593	0.727	0.706	3.16692e-11
Gadd45g	8.72481e-16	0.781727	0.339	0.236	2.03646e-11
Stat1	7.35602e-16	-0.920953	0.282	0.384	1.71697e-11
Pik3c2a	5.13742e-16	-1.24109	0.182	0.275	1.19913e-11
Psme1	4.77122e-16	-0.668499	0.607	0.648	1.11365e-11
Golga2	4.71648e-16	0.294187	0.251	0.151	1.10087e-11
Gm6548	3.4876e-16	-0.699002	0.559	0.394	8.14042e-12
Nme3	2.88009e-16	0.334707	0.32	0.211	6.72241e-12
Ddx5	2.65652e-16	-0.549152	0.828	0.83	6.20059e-12
Rap1gds1	2.41077e-16	-1.06973	0.21	0.305	5.62699e-12
Cnpy3	2.01778e-16	0.265016	0.374	0.258	4.7097e-12
Hmgb2	1.67903e-16	-0.980136	0.322	0.412	3.91903e-12
Cd151	1.42661e-16	-0.750481	0.667	0.663	3.32985e-12
4930402H24Rik	1.39661e-16	-0.915802	0.174	0.271	3.25984e-12
Ccdc53	1.32521e-16	0.280928	0.335	0.22	3.09317e-12
Hprt	1.13323e-16	-0.802345	0.439	0.504	2.64506e-12
Rnf44	8.81274e-17	-0.960555	0.251	0.354	2.05698e-12
Sptlc2	7.22408e-17	-1.0032	0.219	0.321	1.68617e-12
Itgb1	5.09984e-17	-0.555399	0.888	0.877	1.19035e-12
Gpr137b-ps	4.87874e-17	-1.03783	0.158	0.253	1.13875e-12
Pdlim1	4.0085e-17	-0.920541	0.426	0.497	9.35623e-13
Atp5j2	3.65636e-17	-0.635564	0.846	0.791	8.53431e-13
Per3	2.66451e-17	0.264816	0.277	0.168	6.21924e-13
Rsrc1	2.09864e-17	0.416137	0.255	0.152	4.89843e-13
Gins4	1.96397e-17	0.345567	0.272	0.164	4.5841e-13
Tmod3	1.80764e-17	-0.835798	0.562	0.621	4.21921e-13
Sesn1	1.75111e-17	0.272815	0.398	0.272	4.08726e-13
Atp1b2	1.51709e-17	-0.646899	0.328	0.188	3.54104e-13
Cyr61	1.06232e-17	0.976106	0.551	0.454	2.47956e-13
Rell1	7.74549e-18	-1.17682	0.216	0.318	1.80788e-13
Efhd2	4.92156e-18	-1.25403	0.354	0.429	1.14874e-13
Uqcrq	4.84659e-18	-0.867855	0.653	0.681	1.13124e-13
Ttc33	3.52618e-18	0.314161	0.277	0.166	8.23045e-14
Tnfrsf12a	2.78816e-18	0.510528	0.263	0.158	6.50784e-14
Apba3	2.41426e-18	0.310585	0.277	0.167	5.63511e-14
Snx12	2.28675e-18	0.295393	0.326	0.206	5.33751e-14
Ddit3	2.01731e-18	0.476178	0.285	0.176	4.7086e-14
Acly	1.97884e-18	-1.39583	0.309	0.397	4.61881e-14
Pih1d1	1.74902e-18	0.342143	0.34	0.219	4.08238e-14
Higd2a	1.70279e-18	-0.720734	0.473	0.542	3.97449e-14
Zfp710	1.66693e-18	-0.855448	0.153	0.255	3.89078e-14
Smap2	1.64734e-18	-1.04217	0.184	0.283	3.84506e-14
Trpm7	9.68434e-19	0.316691	0.409	0.283	2.26042e-14
Pigk	8.60692e-19	0.398305	0.309	0.195	2.00894e-14
Ehbp1l1	8.58572e-19	-0.945457	0.179	0.285	2.00399e-14
Capza2	7.45384e-19	-0.797981	0.664	0.667	1.7398e-14
Ccdc12	6.70191e-19	-0.698563	0.405	0.495	1.56429e-14
Cand1	6.46796e-19	0.27136	0.3	0.184	1.50969e-14
2210016F16Rik	6.11326e-19	0.299391	0.35	0.225	1.4269e-14
Hn1	3.83217e-19	0.298081	0.587	0.452	8.94468e-15
Tmem214	3.46339e-19	0.33634	0.33	0.211	8.0839e-15
Rdm1	3.39991e-19	0.413772	0.305	0.189	7.93573e-15
Plod1	3.04291e-19	-0.993044	0.454	0.537	7.10246e-15
2310011J03Rik	2.83697e-19	0.366084	0.289	0.173	6.62177e-15
Actr3	2.75166e-19	-1.1067	0.569	0.591	6.42266e-15
Arhgef1	2.53364e-19	-1.14465	0.354	0.455	5.91377e-15
Cbfa2t2	2.48015e-19	0.257192	0.265	0.154	5.78893e-15
Dusp7	2.30324e-19	-1.20349	0.156	0.257	5.376e-15
Brix1	2.00614e-19	0.346294	0.319	0.2	4.68254e-15
Hist3h2a	1.93564e-19	-1.05498	0.158	0.261	4.51799e-15
Micu1	1.93015e-19	0.283313	0.311	0.189	4.50516e-15
Bbx	1.51717e-19	0.33244	0.337	0.216	3.54122e-15
Galk1	9.96614e-20	0.348379	0.268	0.152	2.3262e-15
Rnaset2b	8.78452e-20	-0.560833	0.667	0.677	2.0504e-15
Thap7	7.69868e-20	0.409046	0.27	0.158	1.79695e-15
Gltp	6.34954e-20	-0.922615	0.318	0.412	1.48205e-15
Tspan18	6.32527e-20	-1.34719	0.176	0.279	1.47638e-15
Pxn	5.42723e-20	-1.14892	0.183	0.29	1.26677e-15
Atp2a2	5.21488e-20	-1.6646	0.579	0.397	1.21721e-15
Fryl	5.06937e-20	-1.34779	0.151	0.254	1.18324e-15
Ap1b1	4.98375e-20	-1.41238	0.212	0.313	1.16326e-15
Pole3	4.73585e-20	0.371177	0.266	0.153	1.1054e-15
Pdha1	4.32022e-20	-0.266427	0.49	0.313	1.00838e-15
Adar	4.26635e-20	-1.10601	0.148	0.254	9.95808e-16
Igf2r	4.13758e-20	-0.329499	0.563	0.379	9.65753e-16
Psme2	4.03434e-20	-0.633717	0.66	0.701	9.41656e-16
Cttnbp2nl	3.58324e-20	-0.964108	0.29	0.401	8.36364e-16
Uqcr11	3.20103e-20	-0.71523	0.828	0.784	7.47152e-16
Rnf130	3.03843e-20	-0.817682	0.59	0.627	7.09201e-16
Zbed3	2.64746e-20	0.250549	0.257	0.143	6.17944e-16
4933407C03Rik	2.36162e-20	-1.16091	0.313	0.423	5.51227e-16
Srprb	2.06939e-20	0.300196	0.354	0.226	4.83017e-16
2010003O02Rik	1.30453e-20	0.306732	0.377	0.244	3.04491e-16
Ankrd13a	1.25396e-20	-1.20317	0.165	0.272	2.92688e-16
Sh3glb1	1.11939e-20	-0.709847	0.722	0.739	2.61278e-16
Hmcn1	1.03816e-20	-0.497038	0.287	0.156	2.42316e-16
App	9.70698e-21	-0.517312	0.882	0.855	2.26571e-16
Pold2	8.82088e-21	0.36903	0.265	0.152	2.05888e-16
Tmem222	8.46438e-21	0.381931	0.329	0.203	1.97567e-16
Pip5k1c	8.24483e-21	-1.28618	0.145	0.252	1.92443e-16
Prkcsh	7.63187e-21	0.287364	0.363	0.231	1.78135e-16
AI316807	7.61562e-21	0.426582	0.336	0.209	1.77756e-16
Tmem115	7.59929e-21	0.31936	0.334	0.205	1.77375e-16
Cbr1	6.75099e-21	0.255934	0.347	0.214	1.57575e-16
Hmox2	4.85783e-21	-0.883941	0.303	0.403	1.13387e-16
Ywhah	3.28885e-21	-0.610886	0.708	0.718	7.6765e-17
Cdc42	2.44403e-21	-0.394994	0.934	0.887	5.7046e-17
Ccdc104	2.09203e-21	0.310763	0.261	0.144	4.88301e-17
Mpnd	1.79048e-21	0.465203	0.324	0.202	4.17915e-17
Tubb4b	1.61407e-21	-0.901355	0.559	0.6	3.7674e-17
Glb1	1.2722e-21	0.462564	0.288	0.168	2.96943e-17
Tspan12	1.01199e-21	-1.24497	0.296	0.398	2.36209e-17
Ppp1r12c	8.64826e-22	-1.06677	0.252	0.367	2.01859e-17
Grb2	6.92836e-22	-0.755639	0.418	0.513	1.61715e-17
Mrpl13	4.05787e-22	0.269045	0.405	0.261	9.47147e-18
Cx3cr1	4.01775e-22	-3.88966	0.182	0.274	9.37783e-18
H2afz	3.51754e-22	-0.709803	0.597	0.64	8.21029e-18
Hspb1	3.23555e-22	-0.838002	0.722	0.67	7.55211e-18
Naga	2.9398e-22	0.282116	0.332	0.198	6.86178e-18
Tmem176a	2.80502e-22	-0.99193	0.266	0.373	6.54719e-18
Tars	2.54588e-22	0.278543	0.333	0.201	5.94234e-18
Gm5506	2.31571e-22	-0.888669	0.528	0.564	5.4051e-18
Dnajc18	2.11382e-22	0.364698	0.301	0.174	4.93387e-18
Impdh1	1.92413e-22	-1.26775	0.151	0.259	4.49112e-18
Lgmn	1.7155e-22	-1.75825	0.482	0.541	4.00414e-18
Polr1c	1.46876e-22	0.27483	0.282	0.158	3.42824e-18
Csgalnact2	1.43965e-22	0.415987	0.292	0.167	3.36029e-18
Kat2b	1.20454e-22	0.329101	0.314	0.187	2.81151e-18
Mlec	7.66206e-23	0.272204	0.417	0.276	1.7884e-18
Luzp1	6.60629e-23	-1.02328	0.411	0.508	1.54197e-18
Pitpna	5.85804e-23	-0.973739	0.459	0.533	1.36732e-18
Flot1	5.81336e-23	0.31857	0.385	0.243	1.3569e-18
Wdr45	5.36624e-23	0.390797	0.269	0.149	1.25253e-18
Sumf1	5.06593e-23	0.420509	0.294	0.17	1.18244e-18
Rps15a-ps6	4.92303e-23	0.301505	0.539	0.358	1.14908e-18
Uap1l1	4.6384e-23	0.604464	0.263	0.142	1.08265e-18
Wdr1	4.44614e-23	-0.909661	0.613	0.656	1.03777e-18
Rnf214	4.16946e-23	0.281113	0.291	0.163	9.73194e-19
Hlx	4.09234e-23	-0.999978	0.147	0.263	9.55194e-19
Nup62	3.92121e-23	0.558649	0.261	0.143	9.15251e-19
Twf2	3.82208e-23	-0.940097	0.214	0.336	8.92111e-19
Vmp1	3.53669e-23	0.255936	0.524	0.372	8.25499e-19
Mllt4	3.24745e-23	-1.65015	0.434	0.508	7.57987e-19
Prcp	2.39233e-23	-1.23552	0.182	0.297	5.58395e-19
Fads3	2.3135e-23	0.274968	0.269	0.146	5.39995e-19
Fmo1	2.24404e-23	-1.79131	0.296	0.383	5.23782e-19
Zhx3	2.02414e-23	0.395518	0.269	0.146	4.72456e-19
Arpc4	1.9685e-23	-0.728722	0.714	0.72	4.59468e-19
Cxxc1	1.94409e-23	0.275074	0.32	0.186	4.53769e-19
Pik3ip1	1.79776e-23	0.419192	0.283	0.158	4.19615e-19
Col4a2	1.48411e-23	-1.20365	0.569	0.603	3.46407e-19
Mgst3	1.40551e-23	-1.27004	0.218	0.326	3.28059e-19
Ctps2	1.23374e-23	0.383366	0.268	0.144	2.87968e-19
Tecpr1	9.63969e-24	-1.32297	0.169	0.286	2.25e-19
Acyp2	7.93576e-24	0.31705	0.252	0.128	1.85229e-19
Btg2	7.53236e-24	-0.292335	0.737	0.807	1.75813e-19
Dab2	7.22912e-24	-1.74059	0.27	0.368	1.68735e-19
0610037L13Rik	5.35987e-24	0.273249	0.454	0.298	1.25105e-19
Scyl1	4.59691e-24	0.26307	0.456	0.301	1.07296e-19
Tmem175	3.96956e-24	0.660677	0.261	0.142	9.26536e-20
Abhd4	3.71655e-24	0.250277	0.444	0.292	8.6748e-20
Mesdc1	3.49937e-24	-1.25645	0.183	0.297	8.16788e-20
Prdx6	3.07727e-24	0.263985	0.553	0.395	7.18266e-20
Zcchc24	2.93081e-24	0.304058	0.378	0.233	6.8408e-20
Impa1	2.91957e-24	0.312678	0.368	0.225	6.81456e-20
Iigp1	2.81726e-24	-1.64959	0.151	0.264	6.57576e-20
Cdc123	2.73128e-24	0.315834	0.419	0.274	6.37509e-20
Txnip	2.18394e-24	-0.514242	0.877	0.87	5.09753e-20
Rogdi	1.77938e-24	0.624871	0.304	0.177	4.15326e-20
H2-Q4	1.58868e-24	-0.917792	0.326	0.441	3.70814e-20
Npepps	1.40508e-24	0.255823	0.381	0.231	3.2796e-20
Ccnh	1.27839e-24	0.322153	0.337	0.201	2.98388e-20
Snap47	1.1096e-24	0.353132	0.3	0.168	2.58991e-20
Phc2	9.95689e-25	-1.11881	0.223	0.343	2.32404e-20
Phpt1	9.35281e-25	0.310588	0.395	0.236	2.18304e-20
Lars2	8.27809e-25	-0.539345	0.867	0.876	1.93219e-20
Gpx1	6.04774e-25	-0.83082	0.823	0.789	1.4116e-20
Plscr4	4.99765e-25	-0.409302	0.463	0.284	1.1665e-20
Vav3	4.37409e-25	0.334883	0.343	0.202	1.02096e-20
Dnlz	4.35056e-25	0.300964	0.337	0.193	1.01546e-20
H3f3a	4.15073e-25	-0.361806	0.886	0.86	9.68821e-21
Eno1	2.83111e-25	-0.685472	0.619	0.642	6.6081e-21
Pde6d	2.82976e-25	0.314788	0.371	0.223	6.60493e-21
Polr3gl	2.32949e-25	0.349149	0.361	0.219	5.43727e-21
Fam108a	2.12213e-25	-0.923285	0.47	0.571	4.95325e-21
Aff4	1.9767e-25	0.268921	0.495	0.341	4.61382e-21
Manbal	1.65858e-25	0.268511	0.347	0.202	3.8713e-21
Sfxn3	1.55838e-25	0.254382	0.393	0.237	3.63742e-21
BC003331	1.47875e-25	0.34529	0.373	0.228	3.45156e-21
0610037P05Rik	1.28931e-25	0.261475	0.386	0.236	3.00937e-21
Sft2d1	9.81248e-26	-1.04583	0.324	0.436	2.29033e-21
Gng5	8.34127e-26	-0.46287	0.868	0.817	1.94694e-21
Arfgap1	6.35871e-26	0.339222	0.331	0.191	1.48419e-21
Adam9	5.29638e-26	0.49585	0.34	0.201	1.23623e-21
Chst14	5.11706e-26	0.319411	0.276	0.141	1.19437e-21
Gja1	4.3015e-26	-1.63591	0.346	0.432	1.00401e-21
Gucy1b3	4.1748e-26	-0.434959	0.286	0.139	9.74439e-22
Lztr1	4.04857e-26	0.296652	0.3	0.163	9.44977e-22
Tcta	3.00519e-26	0.334994	0.335	0.193	7.01442e-22
Tmem63a	1.24331e-26	0.411773	0.296	0.161	2.90202e-22
Gcsh	1.24322e-26	0.548565	0.288	0.155	2.9018e-22
Ipo4	1.23233e-26	0.322318	0.27	0.138	2.87638e-22
Tshz1	1.20807e-26	0.299303	0.322	0.179	2.81976e-22
Ktn1	1.19286e-26	-1.18887	0.364	0.487	2.78424e-22
Tns1	1.14995e-26	-1.13902	0.418	0.524	2.68411e-22
Orai1	8.52234e-27	-0.885729	0.175	0.304	1.9892e-22
Zfp771	8.47381e-27	0.720282	0.266	0.138	1.97787e-22
Sec24a	7.99362e-27	0.389216	0.266	0.135	1.86579e-22
Npm3	7.47355e-27	0.403864	0.348	0.198	1.7444e-22
Cask	6.11819e-27	0.533753	0.387	0.246	1.42805e-22
Zfp809	5.51726e-27	0.35516	0.327	0.184	1.28778e-22
Efnb1	4.82445e-27	-1.81388	0.165	0.288	1.12607e-22
St3gal6	4.68707e-27	-1.09529	0.264	0.391	1.09401e-22
4930455C21Rik	4.14203e-27	0.343091	0.35	0.203	9.66791e-23
Tap1	3.95671e-27	-1.47151	0.151	0.273	9.23535e-23
Fam3a	3.46567e-27	0.327874	0.327	0.182	8.08923e-23
Agpat6	2.90621e-27	0.350141	0.375	0.225	6.78339e-23
Csad	2.76251e-27	0.701838	0.269	0.139	6.44797e-23
Mgat4a	2.52264e-27	-1.07979	0.174	0.305	5.88808e-23
5430435G22Rik	2.40767e-27	0.369841	0.319	0.171	5.61975e-23
Bckdk	2.07596e-27	0.274112	0.411	0.25	4.8455e-23
Clcn4-2	2.06536e-27	0.280593	0.506	0.348	4.82076e-23
Churc1	1.81083e-27	0.279171	0.5	0.323	4.22666e-23
Wrb	1.7463e-27	0.58904	0.262	0.133	4.07603e-23
Snapin	1.58967e-27	0.315261	0.464	0.3	3.71044e-23
2810432D09Rik	1.2755e-27	0.547332	0.29	0.155	2.97715e-23
Clptm1l	1.17646e-27	0.298301	0.507	0.341	2.74598e-23
Ndufa8	1.17033e-27	-0.980792	0.571	0.614	2.73167e-23
Zfpl1	9.353e-28	0.385187	0.351	0.2	2.18308e-23
Uba5	8.55335e-28	0.34804	0.392	0.24	1.99644e-23
Dennd5b	7.68855e-28	-1.41059	0.214	0.342	1.79459e-23
D19Bwg1357e	7.53877e-28	0.521498	0.345	0.197	1.75962e-23
Smarcc1	7.51128e-28	0.42533	0.349	0.201	1.75321e-23
Ctnnb1	7.37014e-28	-0.925362	0.663	0.715	1.72026e-23
Clu	7.05091e-28	-1.89327	0.185	0.303	1.64575e-23
Tmx4	6.72995e-28	0.462895	0.306	0.165	1.57084e-23
Ahcyl1	6.3072e-28	0.311563	0.361	0.208	1.47216e-23
Mylip	4.2762e-28	-1.38821	0.205	0.334	9.98107e-24
Myl12b	3.98506e-28	-0.544174	0.891	0.87	9.30153e-24
Tm9sf4	3.81838e-28	0.258599	0.417	0.252	8.91247e-24
Gstk1	3.7312e-28	0.394483	0.33	0.183	8.70898e-24
Cdc42se2	3.68202e-28	-1.31912	0.214	0.345	8.5942e-24
Ublcp1	3.43926e-28	0.301393	0.306	0.162	8.02758e-24
Derl2	3.4289e-28	0.527473	0.406	0.257	8.0034e-24
Fam18b	2.91072e-28	0.268282	0.37	0.215	6.79391e-24
Gnpnat1	2.90027e-28	0.621354	0.255	0.127	6.76953e-24
Dazap2	2.83499e-28	-0.584545	0.73	0.765	6.61715e-24
Zwint	2.05243e-28	0.495028	0.359	0.209	4.79058e-24
Tor2a	1.90024e-28	0.475812	0.324	0.178	4.43536e-24
2310039H08Rik	1.74842e-28	0.448141	0.285	0.148	4.08098e-24
2020-09-04	1.51546e-28	-1.31747	0.337	0.45	3.53722e-24
Xpnpep1	1.44062e-28	0.560903	0.311	0.172	3.36255e-24
Tmem110	1.30298e-28	0.278053	0.26	0.124	3.04129e-24
Tpm4	1.13673e-28	-0.70731	0.865	0.835	2.65324e-24
Nudt4	1.11821e-28	-1.39344	0.336	0.453	2.61002e-24
Apobec3	1.02395e-28	-1.34482	0.127	0.253	2.39e-24
Arhgdib	1.01281e-28	-1.31782	0.445	0.523	2.364e-24
Gpr180	7.89607e-29	0.605888	0.286	0.15	1.84302e-24
Ptplb	7.21031e-29	0.349743	0.374	0.213	1.68296e-24
Arsb	6.86478e-29	0.421487	0.263	0.127	1.60231e-24
Myl12a	5.36193e-29	-0.405202	0.964	0.939	1.25153e-24
Cox4i1	5.26007e-29	-0.513947	0.965	0.921	1.22775e-24
Erlec1	4.95753e-29	0.359193	0.311	0.165	1.15714e-24
Sidt2	4.29975e-29	0.331766	0.437	0.272	1.0036e-24
Gba	4.20397e-29	0.37651	0.429	0.267	9.81248e-25
Vamp8	3.00097e-29	-0.772562	0.469	0.561	7.00456e-25
Mbd3	2.69717e-29	0.44398	0.434	0.279	6.29547e-25
Ppp1r14b	2.53965e-29	0.765943	0.351	0.207	5.92781e-25
Pitrm1	2.37215e-29	0.634801	0.344	0.193	5.53683e-25
Siae	1.92083e-29	0.689707	0.253	0.121	4.48341e-25
Dnajb2	1.67161e-29	0.485773	0.314	0.168	3.90171e-25
Ptprg	1.24046e-29	-1.76258	0.126	0.251	2.89536e-25
Rbbp9	1.22102e-29	0.348787	0.308	0.162	2.84997e-25
Ccdc90b	1.06207e-29	0.525384	0.318	0.173	2.47897e-25
Abcc9	9.60296e-30	-1.48462	0.304	0.14	2.24143e-25
Ralb	9.1597e-30	-0.934303	0.373	0.505	2.13797e-25
Slc35f5	7.38157e-30	0.323998	0.311	0.162	1.72293e-25
Minpp1	7.22914e-30	0.462972	0.314	0.166	1.68735e-25
Cyhr1	5.81337e-30	0.518825	0.36	0.208	1.3569e-25
Arrb2	5.64407e-30	-1.62851	0.138	0.258	1.31738e-25
Vma21	4.42069e-30	0.366136	0.411	0.248	1.03183e-25
Golgb1	4.37474e-30	0.297678	0.447	0.283	1.02111e-25
Limd2	4.03615e-30	-1.65205	0.249	0.371	9.42079e-26
Mpdz	3.33769e-30	0.338233	0.303	0.155	7.79051e-26
Tpm3	3.26751e-30	-0.614955	0.804	0.79	7.6267e-26
2700007P21Rik	2.91805e-30	0.311365	0.373	0.214	6.81102e-26
Vamp7	2.86366e-30	0.264488	0.359	0.202	6.68407e-26
Ephb4	2.78333e-30	-1.59754	0.163	0.293	6.49657e-26
Pddc1	2.70198e-30	0.611105	0.288	0.15	6.3067e-26
Zfp295	2.27084e-30	0.272284	0.367	0.213	5.30036e-26
Grlf1	2.24159e-30	0.256019	0.271	0.13	5.2321e-26
Fech	1.7334e-30	0.436058	0.371	0.208	4.04593e-26
Mocs2	1.57858e-30	0.325468	0.43	0.266	3.68456e-26
Cyb5r1	1.51987e-30	-1.33711	0.161	0.297	3.54752e-26
Bhlhe40	1.45782e-30	0.287213	0.336	0.179	3.40269e-26
Srsf6	1.39765e-30	0.367085	0.495	0.33	3.26224e-26
H2-Eb1	1.32021e-30	-5.53934	0.227	0.336	3.08151e-26
Arpc3	1.21577e-30	-0.5551	0.792	0.776	2.83774e-26
Sypl	1.19186e-30	-1.15714	0.469	0.565	2.78192e-26
Tbc1d10a	1.15709e-30	0.397981	0.336	0.18	2.70076e-26
Spg20	1.01529e-30	0.482643	0.296	0.153	2.3698e-26
Fam49a	9.36869e-31	0.644452	0.3	0.155	2.18675e-26
1110067D22Rik	8.32818e-31	0.317099	0.307	0.154	1.94388e-26
Tmem188	7.41659e-31	0.268309	0.395	0.227	1.73111e-26
Creg1	6.24348e-31	0.319281	0.555	0.374	1.45729e-26
Gtf2h5	5.58503e-31	0.256043	0.537	0.35	1.3036e-26
Hibadh	5.23588e-31	0.260407	0.468	0.286	1.22211e-26
Sat1	5.00701e-31	0.357571	0.849	0.657	1.16869e-26
Esyt2	4.93056e-31	0.25714	0.373	0.211	1.15084e-26
Mfsd10	3.85443e-31	0.500208	0.318	0.166	8.99663e-27
Hsf2	3.47459e-31	0.35449	0.344	0.184	8.11003e-27
AI837181	3.45046e-31	0.526241	0.412	0.251	8.05373e-27
Znrf1	3.40608e-31	-1.63026	0.148	0.281	7.95012e-27
Capzb	2.7289e-31	-0.576517	0.779	0.764	6.36952e-27
Mcl1	2.63986e-31	-0.97851	0.569	0.653	6.1617e-27
Fcrls	1.72011e-31	-4.54374	0.179	0.297	4.0149e-27
Abhd14b	1.6826e-31	0.444566	0.289	0.144	3.92735e-27
Copz1	1.55707e-31	0.35372	0.589	0.415	3.63436e-27
Fam43a	1.36227e-31	-1.15961	0.234	0.374	3.17967e-27
Zbtb44	1.31253e-31	0.394814	0.328	0.174	3.06359e-27
Habp4	1.15578e-31	0.509193	0.288	0.142	2.69771e-27
Rab28	1.13605e-31	0.272533	0.445	0.268	2.65165e-27
Ppp1r18	6.97511e-32	-1.15768	0.218	0.356	1.62806e-27
Mettl11a	3.97674e-32	0.359617	0.305	0.154	9.28212e-28
Nol12	2.46742e-32	0.489	0.264	0.122	5.7592e-28
Tmcc3	2.1084e-32	-1.35301	0.281	0.424	4.92122e-28
Ddhd2	1.53493e-32	0.304207	0.415	0.245	3.58269e-28
Rap2b	1.51744e-32	0.318085	0.488	0.302	3.54185e-28
Efha2	1.24365e-32	0.307611	0.328	0.17	2.9028e-28
Thbd	1.21875e-32	-1.24687	0.438	0.543	2.84468e-28
Slc25a4	8.37675e-33	-0.483645	0.924	0.732	1.95522e-28
Zdhhc1	6.98825e-33	0.413839	0.281	0.133	1.63113e-28
Man1a	6.3757e-33	0.531776	0.361	0.195	1.48815e-28
Sarnp	5.97762e-33	0.259019	0.654	0.455	1.39524e-28
Pdxdc1	5.91708e-33	0.318305	0.479	0.296	1.38111e-28
Txndc15	5.78561e-33	0.297272	0.518	0.324	1.35042e-28
Rgl1	4.18655e-33	-1.39869	0.174	0.317	9.77182e-29
H2-Ab1	3.66796e-33	-6.3572	0.362	0.448	8.56138e-29
Setd7	3.46335e-33	0.399678	0.318	0.162	8.08379e-29
Git2	3.30615e-33	-1.30585	0.246	0.396	7.71689e-29
Hsd17b10	3.22239e-33	0.318714	0.462	0.276	7.52137e-29
Isoc1	2.07081e-33	0.621216	0.349	0.189	4.83349e-29
Sh3gl1	1.95687e-33	0.253802	0.434	0.252	4.56752e-29
Snx21	1.63564e-33	0.627286	0.272	0.126	3.81774e-29
Gbp7	1.52707e-33	-1.45332	0.313	0.449	3.56433e-29
Lgals3	1.49873e-33	-2.8665	0.141	0.265	3.49817e-29
C330006A16Rik	1.25203e-33	0.269048	0.77	0.602	2.92236e-29
Irak1	8.09067e-34	0.251231	0.519	0.332	1.88844e-29
Dph3	7.43993e-34	0.320239	0.441	0.26	1.73655e-29
Hyal2	6.46823e-34	-1.60449	0.15	0.288	1.50975e-29
Tfg	5.88493e-34	0.362458	0.482	0.302	1.3736e-29
Lancl1	5.22364e-34	0.71589	0.292	0.142	1.21925e-29
Clic4	4.53238e-34	-0.994067	0.71	0.764	1.0579e-29
Dip2b	4.34488e-34	-1.47613	0.164	0.311	1.01414e-29
Dnajb11	3.9812e-34	0.272567	0.584	0.389	9.29252e-30
1500003O03Rik	2.0879e-34	0.252964	0.525	0.344	4.87337e-30
Acp1	1.6505e-34	0.348328	0.461	0.283	3.85242e-30
5730437N04Rik	1.34339e-34	0.457843	0.457	0.272	3.13561e-30
Cox6b1	1.24843e-34	-0.725996	0.854	0.832	2.91396e-30
Arhgef3	1.23762e-34	-1.55637	0.152	0.296	2.88873e-30
Slc35b2	1.2196e-34	0.625639	0.413	0.252	2.84666e-30
Dynlt1b	1.09585e-34	0.255931	0.504	0.316	2.55783e-30
Zfp637	9.29443e-35	0.440934	0.358	0.19	2.16941e-30
Fndc3a	9.07934e-35	0.437235	0.424	0.252	2.11921e-30
Myl6	8.29252e-35	-0.452492	0.945	0.936	1.93556e-30
Zfp592	7.55101e-35	0.52345	0.296	0.142	1.76248e-30
Arntl	5.81984e-35	0.418355	0.328	0.166	1.35841e-30
Odc1	3.8101e-35	0.384563	0.366	0.198	8.89315e-31
H2-Aa	3.32638e-35	-5.7286	0.295	0.404	7.7641e-31
Hmgn5	2.75719e-35	0.408395	0.353	0.186	6.43556e-31
Camkk2	1.67779e-35	0.686758	0.272	0.123	3.91612e-31
Myc	1.36932e-35	0.919225	0.277	0.129	3.19612e-31
Cdk17	1.30157e-35	-1.52664	0.123	0.267	3.038e-31
Arsa	1.28106e-35	0.296388	0.433	0.247	2.99013e-31
Selplg	1.21368e-35	-4.13938	0.395	0.48	2.83286e-31
Fam164a	9.87597e-36	0.390921	0.298	0.14	2.30515e-31
Cd44	8.55749e-36	-1.91642	0.13	0.267	1.9974e-31
Eprs	4.53794e-36	0.286953	0.57	0.374	1.0592e-31
Thoc7	4.24632e-36	0.28397	0.489	0.293	9.91135e-32
Zhx2	3.81413e-36	0.617957	0.261	0.112	8.90257e-32
Zbtb16	3.04765e-36	0.640101	0.278	0.128	7.11353e-32
Anxa3	2.84249e-36	-0.963076	0.405	0.535	6.63466e-32
Apbb1ip	2.18574e-36	0.567307	0.307	0.144	5.10174e-32
Derl1	1.41256e-36	0.334922	0.575	0.387	3.29707e-32
Cisd2	1.31634e-36	0.368899	0.479	0.287	3.07247e-32
Trim30a	1.07311e-36	-1.32512	0.16	0.314	2.50475e-32
Stub1	1.0467e-36	0.285604	0.616	0.403	2.44311e-32
Smc6	1.03281e-36	0.275473	0.566	0.373	2.41068e-32
Dvl3	1.02477e-36	0.560153	0.321	0.157	2.39192e-32
Sp100	9.34617e-37	-1.03275	0.355	0.506	2.18149e-32
Elovl5	9.09972e-37	-1.31506	0.302	0.46	2.12397e-32
Aplp2	8.89634e-37	-0.910345	0.89	0.844	2.07649e-32
Dram2	5.6971e-37	-1.09006	0.337	0.488	1.32976e-32
Glo1	5.63582e-37	0.277764	0.545	0.338	1.31546e-32
Cabin1	4.94749e-37	0.584706	0.384	0.211	1.15479e-32
Jkamp	4.52494e-37	0.251101	0.502	0.304	1.05617e-32
Mtus1	4.19011e-37	-1.10949	0.252	0.413	9.78013e-33
Cdk2ap2	4.16792e-37	0.251007	0.586	0.382	9.72834e-33
Wdr61	4.09647e-37	0.322777	0.491	0.297	9.56157e-33
Yipf3	4.04201e-37	0.311815	0.567	0.359	9.43447e-33
Adam10	3.36181e-37	-1.0397	0.599	0.695	7.8468e-33
Cnn2	1.73491e-37	-0.824458	0.486	0.624	4.04946e-33
Copa	1.28637e-37	0.329949	0.655	0.452	3.00252e-33
Sigmar1	1.18668e-37	0.442403	0.384	0.206	2.76983e-33
Ddx1	1.12166e-37	0.320058	0.463	0.272	2.61808e-33
Pdzd2	9.72164e-38	-1.66837	0.125	0.272	2.26913e-33
Abhd8	7.87707e-38	0.486375	0.301	0.137	1.83859e-33
Aldh6a1	7.65034e-38	0.643949	0.313	0.146	1.78567e-33
Fundc2	7.1532e-38	0.312635	0.468	0.267	1.66963e-33
Fmo5	5.96191e-38	0.732069	0.326	0.161	1.39157e-33
Grina	5.67419e-38	0.326283	0.573	0.376	1.32441e-33
Arl5a	4.62848e-38	0.459543	0.388	0.207	1.08033e-33
Eif1a	4.11756e-38	0.347819	0.48	0.288	9.61079e-34
Snx3	3.98207e-38	-0.648847	0.796	0.789	9.29455e-34
Myo1c	3.60847e-38	-1.0697	0.341	0.506	8.42253e-34
Sipa1	2.8098e-38	-1.35614	0.218	0.377	6.55835e-34
Bmyc	2.36608e-38	0.663969	0.457	0.272	5.52268e-34
Adam15	1.69765e-38	-1.29009	0.459	0.569	3.96249e-34
Ap3s1	1.60115e-38	0.324144	0.445	0.25	3.73725e-34
4632428N05Rik	1.24199e-38	-1.69664	0.24	0.382	2.89893e-34
Slc39a13	1.1905e-38	0.668346	0.291	0.133	2.77875e-34
Rin2	9.53313e-39	0.557349	0.48	0.297	2.22513e-34
Hdgfrp3	9.4198e-39	0.377504	0.446	0.268	2.19868e-34
Cox6a1	8.7472e-39	-0.529987	0.846	0.853	2.04168e-34
Adipor2	8.71544e-39	-1.48805	0.18	0.341	2.03427e-34
Agpat4	8.38555e-39	0.662145	0.325	0.159	1.95727e-34
Spcs2	5.44232e-39	0.296751	0.785	0.59	1.27029e-34
Gpr108	4.23096e-39	0.50086	0.447	0.262	9.87549e-35
Fam92a	2.40394e-39	0.60165	0.317	0.149	5.61103e-35
Plcb4	1.92041e-39	-1.7428	0.168	0.324	4.48243e-35
Cd74	1.83134e-39	-6.15952	0.34	0.445	4.27454e-35
Cd59a	1.829e-39	-1.89331	0.145	0.295	4.26907e-35
C1qc	1.61877e-39	-5.87613	0.256	0.382	3.77837e-35
Cdk5rap3	1.35872e-39	0.808518	0.316	0.154	3.17138e-35
Syde1	6.77743e-40	0.278734	0.311	0.136	1.58192e-35
Syngr2	5.63135e-40	-1.08781	0.383	0.522	1.31441e-35
Scamp4	4.67567e-40	0.416847	0.453	0.262	1.09135e-35
Lgals9	2.92101e-40	-1.03548	0.517	0.631	6.81792e-36
Rab3d	2.86133e-40	0.538415	0.339	0.166	6.67864e-36
Flot2	2.69286e-40	0.406384	0.445	0.251	6.28541e-36
Ccdc127	2.4129e-40	0.560354	0.396	0.215	5.63196e-36
Ahsg	2.31919e-40	0.439975	0.289	0.128	5.41322e-36
Sec13	2.28844e-40	0.291163	0.65	0.425	5.34145e-36
Fscn1	1.66605e-40	-1.92406	0.2	0.35	3.88873e-36
2310022B05Rik	1.47536e-40	0.520963	0.323	0.15	3.44364e-36
Srxn1	1.33354e-40	0.68681	0.27	0.113	3.11262e-36
Kif3a	1.25153e-40	0.604108	0.313	0.144	2.92121e-36
Pim3	8.63672e-41	-1.52354	0.26	0.415	2.0159e-36
Stt3b	8.61762e-41	0.435235	0.425	0.23	2.01144e-36
Gapdh	8.28937e-41	-0.507687	0.931	0.905	1.93482e-36
Eif1ax	7.9736e-41	0.525921	0.451	0.255	1.86112e-36
Tspan14	7.64533e-41	-1.67559	0.127	0.279	1.7845e-36
Gm14420	7.54641e-41	0.804694	0.258	0.102	1.76141e-36
Efna1	7.50577e-41	-1.81678	0.127	0.277	1.75192e-36
BC017612	4.24706e-41	-1.76967	0.236	0.38	9.91305e-37
Mrps28	4.07547e-41	0.371807	0.45	0.24	9.51256e-37
Soat1	3.56823e-41	0.439096	0.38	0.191	8.32862e-37
Impact	3.2097e-41	0.405062	0.465	0.271	7.49175e-37
Idh1	3.20541e-41	0.365076	0.5	0.293	7.48175e-37
Gstt3	2.60759e-41	0.468466	0.304	0.132	6.08638e-37
Abcg2	2.51954e-41	-1.74275	0.176	0.335	5.88086e-37
0610007P14Rik	1.90443e-41	0.521927	0.37	0.189	4.44514e-37
Dcbld2	1.56838e-41	0.546527	0.266	0.107	3.66076e-37
Use1	1.45252e-41	0.360623	0.639	0.422	3.39032e-37
B3gnt1	1.35006e-41	0.410918	0.414	0.22	3.15118e-37
Ier2	1.26306e-41	0.753919	0.8	0.654	2.9481e-37
Rgmb	1.23649e-41	0.369786	0.422	0.224	2.8861e-37
Fmr1	1.15201e-41	0.288173	0.392	0.199	2.68891e-37
Tmed9	1.06723e-41	0.259234	0.815	0.612	2.49103e-37
Atp9a	1.06135e-41	0.427692	0.351	0.167	2.47729e-37
Rgl2	9.1676e-42	-1.82372	0.135	0.294	2.13981e-37
Daam1	5.76799e-42	0.35468	0.408	0.214	1.34631e-37
1190007F08Rik	4.89991e-42	0.932543	0.256	0.099	1.14369e-37
Pnp	4.41119e-42	0.34926	0.623	0.404	1.02962e-37
Zfp703	3.60866e-42	0.686908	0.3	0.129	8.42297e-38
Dnajb9	2.59797e-42	0.496874	0.484	0.285	6.06392e-38
Cox5a	2.33591e-42	-1.23126	0.543	0.634	5.45225e-38
C1qa	1.95781e-42	-5.31603	0.226	0.361	4.56973e-38
Lrrk1	1.87336e-42	0.611013	0.328	0.152	4.37262e-38
Hpcal1	1.60845e-42	-1.35858	0.229	0.391	3.75428e-38
Calr	1.48015e-42	0.28737	0.942	0.819	3.45482e-38
Hip1	1.18699e-42	-1.39077	0.172	0.34	2.77055e-38
C1d	1.03895e-42	0.355066	0.54	0.327	2.42501e-38
2610001J05Rik	8.24919e-43	0.335505	0.647	0.428	1.92544e-38
Sqrdl	6.55207e-43	0.422173	0.504	0.298	1.52932e-38
Mpv17	6.18813e-43	0.312828	0.576	0.363	1.44437e-38
Insig1	5.50814e-43	0.286353	0.493	0.291	1.28565e-38
Tsc22d1	5.33668e-43	-1.2569	0.627	0.667	1.24563e-38
4933439F18Rik	4.33171e-43	0.455362	0.454	0.252	1.01106e-38
Nelf	4.21891e-43	0.678901	0.261	0.102	9.84735e-39
Ncor2	3.84375e-43	0.774691	0.411	0.22	8.9717e-39
Plbd2	2.68164e-43	0.54071	0.487	0.289	6.25922e-39
Pld1	2.11391e-43	0.380975	0.366	0.173	4.93408e-39
Ier5	1.69293e-43	-1.34416	0.223	0.396	3.95147e-39
Pfkl	1.47975e-43	-1.54459	0.126	0.286	3.45388e-39
Pbx1	1.46673e-43	0.447053	0.38	0.19	3.42349e-39
Dexi	1.44488e-43	0.751482	0.283	0.118	3.37249e-39
Ptprm	1.31365e-43	-1.81013	0.132	0.294	3.06619e-39
Ldhb	1.29876e-43	-0.29858	0.565	0.317	3.03144e-39
Actn4	1.21677e-43	-1.11996	0.682	0.741	2.84005e-39
1110004F10Rik	7.49402e-44	0.346683	0.645	0.437	1.74918e-39
Rpn1	4.80907e-44	0.340541	0.779	0.606	1.12249e-39
Snx22	3.5489e-44	-0.257899	0.378	0.176	8.28348e-40
Morf4l1	3.46943e-44	0.252466	0.95	0.807	8.09799e-40
Mageh1	3.45537e-44	0.576788	0.3	0.124	8.06518e-40
Tecr	3.16963e-44	0.308034	0.707	0.485	7.39823e-40
Ifi27l1	2.97857e-44	0.299982	0.81	0.602	6.95227e-40
Rarg	2.93927e-44	0.395536	0.379	0.182	6.86054e-40
Tspo	2.47676e-44	0.321842	0.858	0.686	5.78102e-40
Spats2l	2.30975e-44	0.440064	0.306	0.13	5.39118e-40
Insig2	2.23245e-44	0.453944	0.435	0.235	5.21076e-40
Ndrg1	2.14781e-44	-1.83053	0.171	0.335	5.0132e-40
Ppp2r5a	2.09096e-44	-1.2091	0.271	0.449	4.88051e-40
Cetn3	1.72419e-44	0.354737	0.649	0.427	4.02443e-40
Nfkbia	1.41829e-44	-0.757295	0.848	0.861	3.31043e-40
2020-09-09	1.31483e-44	-1.39377	0.142	0.313	3.06894e-40
Man2a1	9.93197e-45	0.374616	0.508	0.294	2.31822e-40
Snx7	9.71074e-45	0.579398	0.277	0.108	2.26658e-40
Tmem173	9.67375e-45	-1.93036	0.116	0.272	2.25795e-40
Fmnl3	9.35124e-45	-1.6036	0.101	0.26	2.18267e-40
Tsn	7.6891e-45	0.38169	0.696	0.481	1.79471e-40
Unc93b1	7.04147e-45	-2.03547	0.327	0.466	1.64355e-40
Fam195b	6.35948e-45	0.359627	0.613	0.395	1.48437e-40
Fam102b	5.19553e-45	0.365767	0.437	0.23	1.21269e-40
Fads1	3.58677e-45	0.265871	0.402	0.2	8.37189e-41
Trim25	3.38257e-45	-1.6498	0.157	0.324	7.89527e-41
2610034B18Rik	2.52348e-45	0.820262	0.303	0.13	5.89005e-41
Syne1	2.31651e-45	-1.67975	0.165	0.337	5.40696e-41
Lima1	2.13744e-45	0.26386	0.502	0.283	4.98899e-41
Kdelr1	1.95265e-45	0.315727	0.668	0.443	4.55769e-41
Usp22	1.83235e-45	0.393296	0.496	0.289	4.27689e-41
Fam115a	1.6319e-45	0.568838	0.3	0.121	3.80902e-41
Pon3	1.41462e-45	0.858197	0.359	0.175	3.30188e-41
Tgfbi	1.35661e-45	0.307607	0.515	0.285	3.16646e-41
Nap1l1	1.31569e-45	0.348598	0.643	0.426	3.07094e-41
Ifi203	1.13362e-45	-1.40522	0.222	0.402	2.64598e-41
Thra	1.13276e-45	0.349566	0.466	0.247	2.64399e-41
Gas6	1.011e-45	0.314914	0.848	0.618	2.35978e-41
Bcl2l1	9.90805e-46	-1.20106	0.357	0.516	2.31264e-41
Klhdc2	7.0001e-46	0.474979	0.447	0.24	1.63389e-41
Dnajb4	5.61477e-46	0.50809	0.403	0.203	1.31054e-41
Ggt5	4.21565e-46	0.80667	0.27	0.103	9.83976e-42
Apba1	4.21018e-46	0.636663	0.292	0.116	9.82697e-42
Ly6a	3.98183e-46	-1.49397	0.614	0.654	9.29399e-42
Sox7	3.95229e-46	-2.0183	0.168	0.331	9.22505e-42
Hp1bp3	3.63909e-46	0.302935	0.743	0.52	8.494e-42
Drap1	3.59158e-46	0.283881	0.75	0.518	8.3831e-42
Malat1	2.58972e-46	-0.478966	0.999	0.995	6.04466e-42
Lrrfip1	2.02732e-46	-1.53047	0.181	0.354	4.73198e-42
Skp1a	1.58679e-46	0.284477	0.893	0.679	3.70373e-42
Vamp3	1.2831e-46	-1.31115	0.382	0.543	2.99488e-42
Cstb	9.75857e-47	0.278859	0.707	0.461	2.27775e-42
Fuca1	4.56539e-47	0.375082	0.646	0.423	1.06561e-42
Chd9	3.33926e-47	0.414052	0.535	0.317	7.79416e-43
Nid2	3.13909e-47	0.488243	0.309	0.127	7.32695e-43
Spin1	3.00941e-47	0.317035	0.59	0.361	7.02428e-43
Tmem100	2.42227e-47	0.633395	0.346	0.158	5.65382e-43
Ngfrap1	2.12377e-47	0.689112	0.411	0.21	4.95709e-43
Fam65a	1.8652e-47	-1.6204	0.195	0.376	4.35356e-43
Tex264	1.13049e-47	0.430034	0.524	0.302	2.63867e-43
Smarcb1	9.50009e-48	0.43437	0.502	0.285	2.21742e-43
Slco2b1	9.28725e-48	0.542569	0.426	0.219	2.16774e-43
Itgav	8.04305e-48	0.504713	0.426	0.217	1.87733e-43
Mical1	7.71795e-48	0.607294	0.254	0.085	1.80145e-43
Ldha	7.61801e-48	-0.653977	0.831	0.847	1.77812e-43
Ift46	5.81996e-48	0.898891	0.314	0.134	1.35844e-43
C1qb	3.82558e-48	-5.44943	0.336	0.468	8.92928e-44
Tln1	3.44777e-48	-0.962835	0.619	0.718	8.04743e-44
Il10rb	3.32399e-48	-1.11746	0.362	0.525	7.75851e-44
Sec23a	3.21932e-48	0.461854	0.375	0.171	7.51422e-44
Tsen34	3.16143e-48	0.374702	0.621	0.392	7.37909e-44
Arhgap29	2.99221e-48	-1.38002	0.259	0.437	6.98413e-44
1110018J18Rik	2.21934e-48	0.349304	0.489	0.264	5.18015e-44
Rapgef1	1.88966e-48	-1.91502	0.224	0.399	4.41066e-44
Casp8	1.76431e-48	-1.89545	0.121	0.287	4.11807e-44
Calm3	1.67608e-48	0.29755	0.764	0.529	3.91214e-44
Tm4sf1	1.1369e-48	-1.61528	0.753	0.69	2.65364e-44
Flnb	8.60552e-49	-1.85124	0.109	0.278	2.00861e-44
Dock7	6.45113e-49	0.732402	0.269	0.096	1.50576e-44
Dab2ip	5.89962e-49	-2.01063	0.151	0.322	1.37703e-44
Klf6	3.30988e-49	-0.97908	0.636	0.722	7.72559e-45
Copg	3.01868e-49	0.425957	0.575	0.355	7.0459e-45
Cdk14	2.55585e-49	0.329427	0.345	0.147	5.96561e-45
5730409E04Rik	1.93742e-49	0.624802	0.318	0.133	4.52213e-45
Htatsf1	1.00905e-49	0.418173	0.471	0.25	2.35522e-45
Dnajc25	8.29889e-50	0.746709	0.277	0.104	1.93704e-45
Car8	6.77743e-50	-2.00018	0.176	0.345	1.58192e-45
Csf1r	6.75403e-50	-5.22947	0.243	0.393	1.57646e-45
Cldn25	6.71913e-50	0.455891	0.529	0.308	1.56831e-45
Kctd11	6.59704e-50	0.560848	0.279	0.1	1.53982e-45
Acot2	3.64597e-50	0.580561	0.47	0.25	8.51007e-46
Psap	2.62613e-50	-0.600197	0.972	0.943	6.12965e-46
Ctss	2.26127e-50	-5.51756	0.314	0.448	5.27803e-46
Samd9l	1.5936e-50	-1.49467	0.146	0.333	3.71963e-46
Scfd1	1.29503e-50	0.559565	0.437	0.226	3.02273e-46
Stk17b	1.24409e-50	-2.09278	0.146	0.317	2.90383e-46
Dctn4	1.07566e-50	0.282681	0.777	0.547	2.5107e-46
Nfil3	1.06728e-50	0.751081	0.325	0.14	2.49114e-46
Scarb2	9.22296e-51	0.520196	0.523	0.301	2.15273e-46
Sepn1	9.00258e-51	0.398695	0.433	0.213	2.10129e-46
Parva	7.61482e-51	0.483201	0.452	0.233	1.77738e-46
Samhd1	6.81247e-51	-1.52383	0.16	0.346	1.5901e-46
Lman1	6.76022e-51	0.351741	0.65	0.417	1.5779e-46
Isg20	6.34909e-51	0.766353	0.292	0.111	1.48194e-46
Hspa13	5.62681e-51	0.941461	0.283	0.106	1.31335e-46
Lrrc8c	5.25704e-51	-1.83757	0.156	0.335	1.22704e-46
Hsp90b1	5.15484e-51	0.312116	0.95	0.837	1.20319e-46
Jund	3.92255e-51	0.363459	0.925	0.744	9.15562e-47
Slc25a17	1.67817e-51	0.690086	0.408	0.203	3.91702e-47
Kdm5b	1.50894e-51	0.380085	0.418	0.2	3.52202e-47
Tmbim6	1.39515e-51	-0.596286	0.917	0.888	3.25641e-47
Sema6a	1.38459e-51	-1.92644	0.115	0.29	3.23177e-47
Cxcl1	1.33247e-51	1.82538	0.343	0.158	3.11012e-47
Ssr4	1.19516e-51	0.317562	0.719	0.481	2.78961e-47
Dnajc1	1.13489e-51	0.621112	0.483	0.265	2.64895e-47
Atp1a1	9.49037e-52	-1.09743	0.426	0.586	2.21515e-47
Atp5b	8.16028e-52	-0.678472	0.928	0.924	1.90469e-47
Sec61b	7.511e-52	0.375111	0.739	0.513	1.75314e-47
Ostf1	6.095e-52	-0.997563	0.536	0.64	1.42263e-47
Rps4x	4.52664e-52	0.258187	0.959	0.84	1.05656e-47
Cnrip1	4.36377e-52	0.666979	0.311	0.119	1.01855e-47
Slc39a7	3.92368e-52	0.461771	0.599	0.374	9.15827e-48
Dtymk	3.55421e-52	0.689569	0.383	0.182	8.29588e-48
Bst2	3.36249e-52	-1.07325	0.587	0.678	7.84839e-48
Cd68	3.34819e-52	-4.7879	0.122	0.282	7.81502e-48
Glg1	2.77875e-52	0.364472	0.613	0.371	6.48587e-48
Rtn4rl1	2.71132e-52	0.901187	0.252	0.081	6.3285e-48
Ypel3	1.61163e-52	0.313656	0.826	0.604	3.7617e-48
Gm14322	1.51354e-52	1.04133	0.269	0.094	3.53275e-48
BC030336	1.42592e-52	0.541471	0.371	0.167	3.32823e-48
Pard3b	1.12775e-52	0.744841	0.251	0.08	2.63227e-48
St3gal4	9.31423e-53	0.78196	0.405	0.198	2.17403e-48
Chsy1	8.6755e-53	0.572659	0.496	0.276	2.02495e-48
Pcbp4	6.29194e-53	0.844413	0.287	0.106	1.4686e-48
Gnptg	3.73121e-53	0.743482	0.417	0.206	8.70902e-49
Tpm2	3.51203e-53	-0.78197	0.382	0.159	8.19743e-49
Mapk9	3.09537e-53	0.624948	0.424	0.207	7.22491e-49
Hnrnpf	2.8123e-53	-0.881735	0.735	0.765	6.5642e-49
Bambi	2.43585e-53	0.904825	0.371	0.169	5.68552e-49
Cdc16	2.23381e-53	0.551702	0.443	0.224	5.21393e-49
Lysmd2	2.03925e-53	0.465667	0.462	0.224	4.75981e-49
Ppapdc1b	1.95985e-53	0.535784	0.344	0.142	4.57449e-49
Tpd52l2	9.67113e-54	0.455485	0.636	0.406	2.25734e-49
Fez2	7.66561e-54	-1.29452	0.306	0.497	1.78923e-49
Chic2	5.28609e-54	0.575535	0.451	0.23	1.23383e-49
Chn2	5.11182e-54	1.44474	0.26	0.088	1.19315e-49
Cttn	4.0319e-54	0.260146	0.478	0.241	9.41085e-50
Picalm	3.25871e-54	-1.16392	0.455	0.631	7.60614e-50
Clec14a	2.65093e-54	-1.99109	0.133	0.313	6.18753e-50
Anxa4	1.12715e-54	0.356143	0.567	0.325	2.63089e-50
Ctsf	9.52365e-55	0.837968	0.439	0.226	2.22292e-50
Adrbk1	8.44155e-55	-1.72949	0.169	0.357	1.97034e-50
Trip6	7.80772e-55	0.951689	0.295	0.107	1.8224e-50
Phactr1	4.98616e-55	0.771894	0.286	0.1	1.16382e-50
Pld4	4.40757e-55	-5.08419	0.119	0.284	1.02877e-50
Gprasp1	4.28864e-55	0.831501	0.327	0.132	1.00101e-50
Cds2	3.73689e-55	-1.58396	0.245	0.438	8.72227e-51
Rasa3	2.84242e-55	0.533608	0.418	0.196	6.63448e-51
Bet1l	2.5207e-55	0.58007	0.418	0.201	5.88356e-51
H13	2.34523e-55	0.396568	0.683	0.442	5.47401e-51
Rab11a	2.10496e-55	-1.01036	0.591	0.704	4.91319e-51
Tiparp	2.08669e-55	0.873894	0.396	0.19	4.87054e-51
Tnfsf12	1.72798e-55	0.331149	0.633	0.364	4.03329e-51
Bcl7c	1.47031e-55	0.547778	0.456	0.23	3.43184e-51
Vasp	1.01134e-55	-1.40155	0.18	0.381	2.36058e-51
Ccdc85b	8.65415e-56	-1.35631	0.36	0.524	2.01997e-51
Prkd2	6.60376e-56	-2.00329	0.098	0.278	1.54138e-51
Mef2c	5.79951e-56	-1.37444	0.35	0.547	1.35366e-51
Tmem98	5.03564e-56	0.724134	0.366	0.152	1.17537e-51
Crlf2	3.5535e-56	-1.52617	0.086	0.261	8.29422e-52
Rasal2	3.39216e-56	-1.81662	0.112	0.297	7.91764e-52
Cd14	3.07623e-56	-4.15907	0.108	0.277	7.18023e-52
Dpm3	2.89015e-56	0.260382	0.724	0.465	6.74589e-52
Carkd	2.58787e-56	0.565651	0.495	0.267	6.04035e-52
Tm2d2	2.55037e-56	0.358888	0.686	0.429	5.95282e-52
Tmem159	2.10981e-56	0.628083	0.459	0.235	4.9245e-52
Lyz2	1.59193e-56	-5.26742	0.399	0.531	3.71572e-52
Cyp4v3	1.49877e-56	0.757399	0.285	0.096	3.49829e-52
Rcn2	1.12186e-56	0.333686	0.657	0.392	2.61853e-52
Lipe	7.19195e-57	-2.00201	0.118	0.305	1.67867e-52
Rhbdf1	6.51997e-57	0.95038	0.337	0.137	1.52183e-52
Fam49b	4.97849e-57	-2.08976	0.116	0.297	1.16203e-52
Als2cr4	4.12324e-57	1.11034	0.279	0.094	9.62406e-53
Limch1	3.94169e-57	-1.81478	0.105	0.289	9.2003e-53
Sec14l1	3.78171e-57	-1.20913	0.34	0.551	8.82689e-53
Gpr146	2.53514e-57	-1.7584	0.13	0.325	5.91728e-53
Dtnbp1	1.49697e-57	0.711575	0.481	0.252	3.49409e-53
Sdc3	8.63249e-58	-1.42312	0.225	0.432	2.01491e-53
Gypc	7.32443e-58	0.644043	0.377	0.159	1.70959e-53
Os9	6.74491e-58	0.48122	0.655	0.406	1.57433e-53
Zadh2	6.49249e-58	0.84366	0.388	0.175	1.51541e-53
Abca9	5.31738e-58	0.488251	0.461	0.217	1.24113e-53
Atp5j	4.33249e-58	-0.79283	0.882	0.878	1.01125e-53
Fcgr3	3.72887e-58	-4.29346	0.105	0.275	8.70355e-54
Ccpg1	2.86143e-58	0.446597	0.618	0.375	6.67886e-54
Sdf4	2.76003e-58	0.342848	0.83	0.604	6.44219e-54
Eef1d	2.22324e-58	0.394841	0.79	0.56	5.18927e-54
Jam2	1.94695e-58	-1.79839	0.437	0.559	4.54437e-54
Rac2	1.66828e-58	-4.67477	0.132	0.305	3.89394e-54
Btd	1.44254e-58	0.610516	0.392	0.17	3.36704e-54
Gatad1	1.2156e-58	0.489337	0.725	0.49	2.83734e-54
Zfp260	1.06432e-58	0.474071	0.464	0.227	2.48423e-54
Trim37	7.80543e-59	-1.21516	0.126	0.324	1.82187e-54
Capg	4.90548e-59	0.319638	0.597	0.331	1.14499e-54
Klhl9	4.55553e-59	0.370365	0.773	0.526	1.06331e-54
Creb3l2	4.28587e-59	0.800215	0.381	0.163	1.00037e-54
Mef2a	3.32098e-59	-1.26281	0.253	0.476	7.7515e-55
Laptm5	3.11747e-59	-5.1455	0.287	0.443	7.2765e-55
Plod2	2.98171e-59	0.940154	0.272	0.085	6.95961e-55
S100a1	2.06791e-59	-1.36247	0.341	0.536	4.82671e-55
Tmem167	2.00338e-59	0.615694	0.571	0.333	4.67609e-55
Hexb	1.945e-59	0.277839	0.848	0.674	4.53982e-55
Pigp	1.82468e-59	0.398388	0.585	0.316	4.25898e-55
Psmb8	1.79709e-59	-1.16114	0.539	0.658	4.1946e-55
Ang	1.44889e-59	0.84509	0.315	0.11	3.38185e-55
Dcakd	1.02179e-59	0.977079	0.361	0.149	2.38497e-55
Nr2f2	9.90951e-60	-0.283527	0.598	0.278	2.31298e-55
BC013529	8.11038e-60	0.334348	0.701	0.429	1.89304e-55
Arpc2	7.9571e-60	-0.755754	0.804	0.841	1.85727e-55
Man2a2	6.44672e-60	0.950254	0.341	0.135	1.50473e-55
Yif1a	2.57741e-60	0.638584	0.528	0.284	6.01592e-56
Rod1	2.29543e-60	-1.41431	0.332	0.537	5.35777e-56
Mndal	2.06169e-60	-1.48737	0.249	0.462	4.8122e-56
Tmed1	2.04381e-60	0.827998	0.406	0.187	4.77045e-56
Pkd1	1.73562e-60	0.652791	0.347	0.136	4.05112e-56
Sra1	1.55141e-60	0.515892	0.585	0.339	3.62115e-56
Aga	1.423e-60	0.774559	0.408	0.187	3.32142e-56
Creld2	9.67807e-61	0.677404	0.527	0.289	2.25896e-56
Coro1a	5.81273e-61	-5.21289	0.179	0.356	1.35675e-56
St3gal5	3.37545e-61	-2.01055	0.081	0.263	7.87864e-57
Sash1	3.33664e-61	0.429659	0.669	0.408	7.78806e-57
Cd97	2.38441e-61	-1.28944	0.32	0.527	5.56544e-57
AW112010	2.37894e-61	-1.99248	0.319	0.485	5.55268e-57
Adk	2.05301e-61	0.939494	0.392	0.173	4.79193e-57
Vamp2	1.04876e-61	0.415627	0.543	0.282	2.4479e-57
Trps1	7.84856e-62	0.53405	0.422	0.185	1.83193e-57
Epb4.1	6.41149e-62	-1.58748	0.219	0.426	1.49651e-57
Mcfd2	4.37698e-62	0.496623	0.638	0.386	1.02163e-57
Slc10a6	4.28001e-62	0.795723	0.32	0.113	9.98997e-58
Surf4	4.18654e-62	0.418657	0.746	0.494	9.7718e-58
Pdia4	2.96642e-62	0.508517	0.63	0.376	6.92391e-58
Ehd1	1.11292e-62	-1.37675	0.394	0.584	2.59766e-58
Dnajc10	6.43731e-63	0.533848	0.539	0.287	1.50253e-58
Mpst	5.83106e-63	1.01843	0.274	0.08	1.36103e-58
Ptpn6	5.01895e-63	-4.7744	0.088	0.264	1.17147e-58
Rpsa	3.28447e-63	0.331829	0.964	0.88	7.66627e-59
Tmem204	2.69038e-63	-1.40724	0.416	0.565	6.27962e-59
Tmem39a	2.42678e-63	0.844449	0.364	0.146	5.66434e-59
0610007C21Rik	2.30267e-63	0.444614	0.765	0.522	5.37467e-59
Rap2a	1.31467e-63	0.688086	0.38	0.156	3.06857e-59
St6galnac6	1.19912e-63	0.701083	0.347	0.128	2.79886e-59
Armcx3	9.90522e-64	0.613216	0.423	0.188	2.31198e-59
Copb2	5.64852e-64	0.490067	0.618	0.366	1.31842e-59
H6pd	5.32865e-64	1.31293	0.275	0.082	1.24376e-59
Armcx2	4.89352e-64	0.803637	0.292	0.089	1.1422e-59
Itpkb	4.73659e-64	-2.18631	0.092	0.286	1.10557e-59
Akr1b8	4.58317e-64	1.71383	0.254	0.072	1.06976e-59
Il1r1	4.13966e-64	0.942155	0.345	0.13	9.66239e-60
Atox1	4.02448e-64	-0.883209	0.672	0.751	9.39355e-60
Gabarap	3.57627e-64	0.358073	0.933	0.779	8.34737e-60
Ryk	3.38058e-64	0.438988	0.43	0.183	7.89062e-60
Mesdc2	2.85871e-64	0.595888	0.587	0.341	6.67251e-60
Myo18a	2.38642e-64	-1.7826	0.076	0.266	5.57014e-60
Ces1d	1.88192e-64	1.91056	0.259	0.076	4.39258e-60
Rftn2	1.74565e-64	1.10474	0.265	0.073	4.07452e-60
Hmgn3	1.705e-64	0.844793	0.32	0.107	3.97964e-60
Ube2e2	1.6007e-64	1.05418	0.279	0.083	3.7362e-60
Fcer1g	1.55521e-64	-4.38966	0.106	0.287	3.63002e-60
Jup	1.40563e-64	-1.35542	0.673	0.753	3.28088e-60
Hdlbp	1.27236e-64	0.475134	0.63	0.364	2.9698e-60
Myo1b	1.21154e-64	-2.38665	0.094	0.286	2.82785e-60
Ttc3	9.01003e-65	0.472595	0.593	0.337	2.10303e-60
Enpp6	8.38657e-65	0.647027	0.292	0.085	1.95751e-60
Ly86	8.2798e-65	-3.58399	0.096	0.277	1.93259e-60
Pik3r2	7.2073e-65	0.881037	0.323	0.112	1.68226e-60
Afap1	5.09507e-65	0.416924	0.473	0.219	1.18924e-60
4931406P16Rik	5.04196e-65	-1.85837	0.195	0.408	1.17684e-60
Ssr1	3.27487e-65	0.361456	0.898	0.695	7.64387e-61
Enpp5	3.18521e-65	0.803804	0.345	0.126	7.4346e-61
Flt3l	2.49185e-65	0.362251	0.32	0.101	5.81624e-61
Cxx1c	2.38752e-65	0.731572	0.457	0.218	5.5727e-61
Tyrobp	1.19707e-65	-5.19781	0.121	0.308	2.79409e-61
Ptp4a1	7.3753e-66	0.608703	0.477	0.22	1.72147e-61
2810453I06Rik	6.36365e-66	0.554928	0.44	0.194	1.48534e-61
Clic1	4.69201e-66	-0.777448	0.747	0.786	1.09516e-61
Ptp4a3	2.31776e-66	-1.67479	0.31	0.512	5.40988e-62
Tppp3	1.7039e-66	0.662401	0.636	0.394	3.97707e-62
Acadsb	1.22642e-66	0.716229	0.452	0.206	2.86259e-62
Zfp385a	9.86769e-67	0.883624	0.296	0.089	2.30322e-62
Adcy7	8.99543e-67	0.941886	0.35	0.126	2.09962e-62
Sorbs1	6.43013e-67	-1.84779	0.235	0.447	1.50086e-62
Arhgap21	5.47033e-67	0.798662	0.374	0.146	1.27683e-62
Pdia6	5.31619e-67	0.421433	0.888	0.697	1.24085e-62
Rpl4	5.31406e-67	0.291861	0.987	0.903	1.24036e-62
Ssr2	5.14768e-67	0.427498	0.746	0.48	1.20152e-62
Ak3	4.24693e-67	0.455804	0.561	0.296	9.91277e-63
Kctd12	4.09395e-67	-1.94356	0.147	0.355	9.5557e-63
Etfa	3.15144e-67	0.361176	0.657	0.375	7.35577e-63
1110003E01Rik	2.1317e-67	0.406424	0.842	0.602	4.9756e-63
Tmed2	1.98296e-67	0.327152	0.925	0.69	4.62843e-63
Psmb9	1.89741e-67	-1.37405	0.234	0.455	4.42874e-63
Nrip1	8.94846e-68	0.739046	0.385	0.154	2.08866e-63
Adamtsl5	8.79981e-68	1.67019	0.272	0.078	2.05396e-63
Epb4.1l2	8.46055e-68	0.432784	0.636	0.374	1.97478e-63
Smad3	5.97876e-68	1.10533	0.323	0.109	1.3955e-63
Pik3c2b	5.21624e-68	-1.73973	0.151	0.372	1.21752e-63
Rnft1	3.98549e-68	0.617096	0.47	0.218	9.30252e-64
Ctsz	3.79945e-68	0.338006	0.903	0.664	8.86829e-64
Ncoa1	2.8454e-68	0.853434	0.449	0.206	6.64145e-64
Osbpl5	2.48407e-68	1.07565	0.287	0.083	5.79808e-64
Ptms	2.36773e-68	0.344172	0.915	0.684	5.52651e-64
Gm4980	1.90972e-68	1.51019	0.264	0.07	4.45747e-64
2310008H04Rik	1.55882e-68	0.421171	0.311	0.093	3.63844e-64
Chpt1	1.03013e-68	0.486317	0.455	0.195	2.40443e-64
Arhgap32	7.98346e-69	1.01167	0.263	0.066	1.86342e-64
Wls	3.93691e-69	0.411577	0.623	0.344	9.18914e-65
A430107O13Rik	3.69262e-69	0.332389	0.568	0.286	8.61895e-65
Ggh	3.19229e-69	0.588321	0.572	0.297	7.45112e-65
Pnpla2	2.76936e-69	-1.60138	0.245	0.459	6.46396e-65
Lbr	1.66345e-69	-1.58347	0.263	0.494	3.88266e-65
Gorasp2	1.4443e-69	0.619174	0.637	0.381	3.37113e-65
Trp53i13	1.10528e-69	0.882803	0.388	0.154	2.57983e-65
Socs1	6.38838e-70	0.90554	0.256	0.061	1.49111e-65
Adm	5.82064e-70	1.72571	0.325	0.113	1.3586e-65
Klf2	5.78479e-70	-1.40383	0.646	0.726	1.35023e-65
Csda	3.48605e-70	0.488885	0.728	0.469	8.13678e-66
Lphn2	2.98229e-70	-2.20051	0.061	0.255	6.96096e-66
Cd81	1.57196e-70	-0.503121	0.992	0.962	3.66912e-66
Psip1	1.46255e-70	0.455778	0.619	0.344	3.41375e-66
Myh10	9.81513e-71	0.86834	0.386	0.15	2.29095e-66
C030046I01Rik	9.49215e-71	0.353794	0.686	0.399	2.21556e-66
1810006K21Rik	7.40653e-71	0.443688	0.803	0.523	1.72876e-66
Dbi	5.36939e-71	0.3281	0.837	0.58	1.25327e-66
Cnpy4	2.76346e-71	0.890316	0.434	0.19	6.45018e-67
Art3	2.66028e-71	-2.76942	0.102	0.301	6.20935e-67
Rnh1	2.24219e-71	0.567272	0.714	0.471	5.23349e-67
Sar1a	2.18575e-71	0.375786	0.764	0.483	5.10176e-67
Tcf7l2	2.13321e-71	0.478299	0.671	0.391	4.97914e-67
Swi5	1.8081e-71	0.394184	0.812	0.537	4.22029e-67
Lifr	1.57471e-71	-1.41245	0.228	0.467	3.67552e-67
9130011J15Rik	1.26472e-71	0.56415	0.655	0.385	2.95198e-67
Dhrs7	1.25151e-71	0.543714	0.684	0.419	2.92114e-67
Lama4	1.0677e-71	0.496745	0.62	0.336	2.49211e-67
Glt8d1	8.45676e-72	0.852116	0.444	0.198	1.97389e-67
Rora	7.88382e-72	0.774655	0.37	0.134	1.84016e-67
Gpc3	6.0439e-72	1.42613	0.286	0.079	1.41071e-67
Acaa2	5.46324e-72	0.428383	0.712	0.434	1.27518e-67
Gga2	4.86942e-72	1.33117	0.311	0.098	1.13657e-67
Srm	4.60578e-72	0.991087	0.434	0.195	1.07504e-67
Stt3a	1.99845e-72	0.472353	0.747	0.482	4.66459e-68
Lrrc58	1.63383e-72	0.327962	0.951	0.842	3.81352e-68
Akt2	1.51688e-72	0.955725	0.437	0.191	3.54055e-68
Skap2	1.47033e-72	-2.2712	0.071	0.27	3.43189e-68
Slfn5	1.22192e-72	-1.64086	0.455	0.63	2.85208e-68
Fat1	1.09551e-72	1.29523	0.273	0.069	2.55703e-68
Asph	8.39566e-73	0.454788	0.559	0.269	1.95963e-68
Rcsd1	4.91096e-73	-1.64147	0.169	0.402	1.14627e-68
Mir568	4.48882e-73	0.950729	0.289	0.077	1.04774e-68
Plat	4.33854e-73	0.39238	0.588	0.291	1.01266e-68
Scd2	4.0142e-73	0.711654	0.372	0.137	9.36954e-69
Itpripl1	3.67143e-73	-1.56019	0.297	0.521	8.56947e-69
Lsp1	2.88077e-73	-0.371688	0.649	0.32	6.72401e-69
Tgm2	2.83389e-73	-1.74806	0.311	0.534	6.61458e-69
Crim1	2.69155e-73	-1.92747	0.162	0.395	6.28234e-69
Rbbp7	1.94798e-73	0.499172	0.757	0.489	4.54677e-69
Anxa6	1.91781e-73	0.460115	0.806	0.533	4.47635e-69
Utrn	1.55596e-73	-1.75216	0.307	0.531	3.63177e-69
Pja1	1.30352e-73	0.73106	0.5	0.237	3.04254e-69
Cd53	9.26141e-74	-4.95133	0.129	0.33	2.16171e-69
Mbtps1	8.66597e-74	0.716056	0.48	0.213	2.02272e-69
Mettl7a1	6.04734e-74	1.05289	0.396	0.156	1.41151e-69
Cbr3	5.90263e-74	1.23984	0.296	0.082	1.37773e-69
Yipf5	4.48179e-74	0.645243	0.575	0.306	1.04609e-69
Fads2	3.14519e-74	1.2022	0.267	0.062	7.34119e-70
Smo	2.94225e-74	0.962319	0.295	0.078	6.8675e-70
Sgcb	2.58763e-74	0.65305	0.501	0.228	6.03979e-70
Btg1	2.21631e-74	-1.47839	0.55	0.699	5.17308e-70
Plekha5	1.56958e-74	1.06063	0.294	0.08	3.66356e-70
Pfn1	1.45204e-74	-0.689237	0.951	0.921	3.38921e-70
Ctnna1	1.0395e-74	-1.10109	0.678	0.786	2.4263e-70
Tril	3.5206e-75	0.627581	0.353	0.114	8.21743e-71
Caskin2	3.47968e-75	-2.32403	0.084	0.295	8.12192e-71
Sqstm1	2.68034e-75	0.393958	0.921	0.77	6.25617e-71
B3gnt8	2.34377e-75	1.13008	0.297	0.08	5.47059e-71
Tgfb1i1	1.98813e-75	0.398449	0.601	0.291	4.6405e-71
Tpst2	1.87628e-75	-1.76892	0.238	0.469	4.37943e-71
Tmem64	1.30323e-75	0.744218	0.454	0.191	3.04186e-71
S100a10	9.05748e-76	0.432389	0.926	0.703	2.11411e-71
Tusc3	8.02949e-76	0.62922	0.508	0.233	1.87416e-71
Eps15	5.76815e-76	0.571046	0.625	0.339	1.34634e-71
Id2	4.15316e-76	0.511849	0.68	0.398	9.69389e-72
Mylk	2.8312e-76	-3.44414	0.058	0.255	6.60829e-72
Sgms1	1.76788e-76	-1.60815	0.238	0.483	4.12641e-72
Ckb	1.68265e-76	0.475381	0.749	0.471	3.92747e-72
Gprc5b	1.67031e-76	1.15835	0.304	0.083	3.89867e-72
Ppp1r13b	6.20678e-77	-2.42365	0.065	0.269	1.44873e-72
Hic1	2.29133e-77	0.509013	0.395	0.133	5.34819e-73
Rhoq	2.26151e-77	1.01916	0.399	0.148	5.27858e-73
Dsel	2.18805e-77	1.07724	0.277	0.066	5.10714e-73
Klf15	1.75857e-77	1.07701	0.334	0.105	4.10469e-73
Stom	1.6398e-77	-1.92922	0.082	0.3	3.82746e-73
Qk	5.19414e-78	-1.36251	0.53	0.709	1.21236e-73
Dpp7	4.08476e-78	1.28606	0.327	0.098	9.53425e-74
Egr2	3.07218e-78	1.98766	0.258	0.057	7.17077e-74
Nav1	2.48626e-78	0.527407	0.632	0.346	5.80319e-74
Fcgrt	2.34928e-78	0.31623	0.892	0.625	5.48346e-74
Phldb1	2.16457e-78	1.11303	0.37	0.13	5.05233e-74
Hspa8	1.64624e-78	-0.488016	0.984	0.963	3.8425e-74
Ptprc	8.5307e-79	-4.75328	0.065	0.264	1.99115e-74
Hmgn2	5.71819e-79	0.607399	0.679	0.399	1.33468e-74
Lrpap1	5.17617e-79	0.483213	0.756	0.485	1.20817e-74
Crtc3	3.12126e-79	0.81496	0.395	0.137	7.28533e-75
Cxxc5	1.66885e-79	0.813476	0.446	0.181	3.89526e-75
[truncated: 798 more rows]
