# Supplementary material for: Cardiac endothelial cells maintain open chromatin and expression of cardiomyocyte myofibrillar genes
Source: eLife journal article supplement (doi:10.7554/elife.55730), 2020-12-14
Supplement: supp [file elife-55730-supp-v1.zip › elife_poa_e55730_Supplementary_file_2.xlsx]

## Sheet: AllGeneSpliceRatios
Gene	CM SUM	CM spliced	CM unspliced	ratio	EC spliced	EC unspliced	Ratio	FB spliced	FB unspliced	Ratio
mt-Cytb	8488732	8488732	0	0	30677763	0	0	30561402	0	0
mt-Co1	7888245	7888245	0	0	38798800	0	0	47712443	0	0
mt-Rnr2	7458396	7458396	0	0	13421185	0	0	8423839	0	0
mt-Nd1	6230066	6230066	0	0	18826427	0	0	11205284	0	0
mt-Nd5	4307799	4307799	0	0	9888815	0	0	5343917	0	0
Nppa	3976365	3976257	108	2.71605e-05	151692	0	0	168476	16	9.49594e-05
mt-Nd4	3235226	3235226	0	0	8710159	0	0	5600197	0	0
Myh6	2049331	2030484	18847	0.00919666	44390	2	4.50521e-05	53626	9	0.000167798
Myl7	2041801	2037354	4447	0.00217798	123468	642	0.00517279	176378	609	0.00344091
Tnni3	2002318	2000941	1377	0.000687703	137968	3	2.17435e-05	104438	1	9.57488e-06
mt-Rnr1	1829977	1829977	0	0	7532946	0	0	5491778	0	0
Slc25a4	1680933	1680414	519	0.000308757	553654	379	0.000684074	2260383	767	0.000339208
Ttn	1553284	1485718	67566	0.0434988	10081	1098	0.0982111	11921	203	0.0167423
Tnnt2	1510928	1476702	34226	0.0226523	132397	44	0.000332221	125929	262	0.0020762
Atp5b	1490153	1490115	38	2.55007e-05	1979522	796	0.000401955	4081466	1532	0.000375214
0610012D04Rik		0	0	0	0	0	0	0	0	0
mt-Nd2	1478128	1478128	0	0	5955289	0	0	3389968	0	0
Atp2a2	1290317	1276717	13600	0.01054	57946	8234	0.124416	269554	64296	0.192589
Tpm1	1156256	1154182	2074	0.00179372	434115	49560	0.102465	707595	65029	0.0841663
0610031O16Rik		0	0	0	0	0	0	214	0	0
0610033M10Rik		0	0	0	0	0	0	0	0	0
Actc1	1052988	1052988	0	0	92049	0	0	77528	0	0
0610039K10Rik		0	0	0	0	0	0	7	0	0
Clu	1001188	1000760	428	0.000427492	257973	683	0.00264056	314896	32	0.00010161
Aldoa	855250	855193	57	6.66471e-05	1469736	373	0.000253723	3878872	888	0.00022888
Sln	850733	848506	2227	0.00261774	61029	2	3.27697e-05	69600	0	0
Gpx3	847031	845696	1335	0.00157609	101060	1805	0.0175471	11574497	14180	0.00122361
0710001A04Rik		0	0	0	0	0	0	2	0	0
Mdh1	828365	825178	3187	0.00384733	252380	4577	0.0178122	1185906	5006	0.0042035
1100001I12Rik		0	0	0	0	3	0.75	0	0	0
Csrp3	700059	696761	3298	0.00471102	43735	38	0.000868095	26934	3	0.000111367
1110002J07Rik		0	0	0	155	23	0.128492	81	92	0.528736
Atp5g1	623274	622754	520	0.000834303	173277	229	0.00131983	492179	1880	0.00380521
Ckmt2	599721	596240	3481	0.00580436	8622	1116	0.114591	12049	16	0.00132604
1110003F10Rik		0	0	0	0	0	0	0	0	0
Crip2	581330	580857	473	0.00081365	2576314	9460	0.00365848	4711375	7612	0.00161306
Myl4	563127	560493	2634	0.00467744	37363	624	0.0164262	53191	2045	0.0370223
1110008E08Rik		0	0	0	0	0	0	0	0	0
Atp5a1	547775	547642	133	0.0002428	577563	3138	0.0054038	1518363	3803	0.00249841
Mb	544000	543568	432	0.000794116	51736	90	0.00173655	40459	226	0.00555474
Cox4i1	540496	540034	462	0.000854769	682938	1468	0.00214492	1636919	3911	0.00238355
1110015O18Rik		0	0	0	1	8	0.8	0	0	0
1110017D15Rik		0	0	0	17	1121	0.984197	538	1111	0.673333
Uqcrc1	516684	516501	183	0.000354181	580966	4525	0.00772854	1321832	10993	0.00824789
1110019B22Rik		0	0	0	0	0	0	1	0	0
Fth1	480773	480720	53	0.000110239	1175240	645	0.000548523	9666603	741	7.66498e-05
Myl3	474183	473762	421	0.000887841	47014	184	0.00389839	25100	0	0
1110025L11Rik		0	0	0	0	0	0	0	0	0
1110025M09Rik		0	0	0	3003	0	0	190	0	0
1110028F11Rik		0	0	0	0	0	0	0	0	0
1110028F18Rik		0	0	0	0	3	0.75	0	3	0.75
Fabp3	471411	469853	1558	0.00330496	31282	7	0.000223714	20121	2	9.93838e-05
Mdh2	463780	463625	155	0.000334209	528335	624	0.00117967	1403662	1660	0.00118122
1110032F04Rik		0	0	0	0	0	0	6	0	0
1110035H17Rik		0	0	0	464	0	0	456	0	0
Ldhb	458623	457569	1054	0.00229818	106667	691	0.00643635	767489	4448	0.00576212
Gapdh	397885	397883	2	5.02657e-06	754316	53	7.02573e-05	1949734	80	4.10295e-05
Slc25a3	393902	393868	34	8.63157e-05	433870	306	0.000704782	1388554	745	0.000536241
Atp5c1	390480	389304	1176	0.00301167	417335	6525	0.0153942	1109972	11189	0.00997982
1110057P08Rik		0	0	0	0	0	0	0	0	0
Mybphl	372341	368605	3736	0.0100338	22422	124	0.00549962	20414	58	0.002833
Myl2	363379	362566	813	0.00223733	41508	81	0.00194758	14454	1	6.91754e-05
1110060G06Rik		0	0	0	0	0	0	0	0	0
Sdhb	358618	358261	357	0.000995485	273623	6700	0.0239009	830927	18960	0.0223088
1190001M18Rik		0	0	0	0	0	0	0	0	0
Ech1	349828	349677	151	0.000431639	373733	2426	0.00644938	917754	4961	0.00537652
Cryab	349600	349197	403	0.00115274	25527	11	0.000430714	489421	1950	0.00396848
1190028D05Rik		0	0	0	0	6	0.857143	0	2	0.666667
Atp5pb	327031	326427	604	0.00184691	313210	5122	0.0160901	997929	5508	0.00548913
Uqcrfs1	318924	318924	0	0	202477	620	0.00305271	427119	1024	0.00239172
Tcap	316840	316693	147	0.000463955	22384	4	0.000178659	22382	0	0
Pam	315693	282181	33512	0.106153	79397	72092	0.475886	1305447	367808	0.219816
1500002C15Rik		0	0	0	2584	0	0	10623	0	0
Actn2	312682	307164	5518	0.0176473	25070	115	0.00456603	10685	7	0.000654634
1500004A13Rik		0	765	0.998695	897	2980	0.768437	10662	15755	0.596374
1500005C15Rik		0	0	0	0	0	0	0	0	0
1500009C09Rik		0	0	0	0	2	0.666667	0	0	0
Pgam2	306762	306412	350	0.00114095	26768	354	0.0130517	20491	383	0.0183473
mt-Nd6	299846	299846	0	0	849769	0	0	539282	0	0
1500012K07Rik		0	7	0.875	0	2	0.666667	0	438	0.997722
Eno3	295009	294937	72	0.00024406	48125	3	6.23325e-05	37960	53	0.00139422
1500015L24Rik		0	105	0.990566	0	46	0.978723	0	922	0.998917
Gsn	292699	292278	421	0.00143833	710936	410	0.000576371	118826491	137259	0.00115379
1500032F14Rik		0	0	0	0	9	0.9	311	2304	0.880734
Ogdh	287701	284897	2804	0.0097462	192683	33299	0.147352	433650	58268	0.11845
1520401A03Rik		0	0	0	105	52	0.329114	0	0	0
1600002D24Rik		0	157	0.993671	0	1116	0.999105	0	55	0.982143
1600010M07Rik		0	846	0.998819	0	5946	0.999832	4	28870	0.999827
Atp5h	278979	278134	845	0.00302889	220382	2844	0.0127404	572662	2670	0.00464079
1600012P17Rik		0	0	0	0	0	0	0	0	0
Lpl	268453	266413	2040	0.00759907	1627645	33480	0.020155	2615856	19097	0.00724756
Ndrg2	259927	259797	130	0.000500138	28072	6	0.000213683	3343232	2151	0.000642976
1600017P15Rik		0	0	0	2	0	0	164	0	0
1600017P15Rik		0	0	0	0	0	0	2	0	0
1600019K03Rik		0	0	0	0	0	0	0	0	0
Hadhb	254899	253589	1310	0.00513927	166483	12017	0.0673218	535766	19276	0.0347288
1600022D10Rik		0	93	0.989362	973	190	0.16323	1	21	0.913043
1600023N17Rik		0	0	0	0	0	0	202	0	0
1600025M17Rik		0	0	0	0	1	0.5	2	1	0.25
1600027J07Rik		0	1	0.5	0	0	0	0	0	0
1600029O15Rik		0	0	0	0	0	0	882	659	0.427367
1700001C19Rik		0	32	0.969697	412	23	0.0527523	0	4	0.8
1700001D01Rik		0	0	0	0	0	0	0	0	0
1700001F09Rik		0	1	0.5	3	4	0.5	0	2	0.666667
1700001G01Rik		0	4	0.8	0	43	0.977273	0	62	0.984127
Ndufv1	254556	254319	237	0.000931029	190970	2637	0.0136203	507850	1994	0.00391099
1700001G17Rik		0	0	0	0	0	0	6050	0	0
1700001J03Rik		0	0	0	4	1	0.166667	1091	0	0
1700001J04Rik		0	0	0	0	0	0	0	0	0
1700001J11Rik		0	0	0	6	0	0	12	0	0
1700001K19Rik		0	19	0.95	216	1950	0.899862	318	4846	0.938238
1700001K23Rik		0	4	0.8	16	388	0.958025	272	5683	0.954164
1700001L05Rik		0	0	0	1312	4	0.00303721	6018	48	0.00791165
1700001L19Rik		0	8	0.888889	77	632	0.890141	680	86	0.112125
1700001N15Rik		0	0	0	0	0	0	0	0	0
Ckm	251056	250986	70	0.000278821	36720	7	0.00019059	16438	121	0.00730676
Eef1a1	239759	239758	1	4.17084e-06	5265272	3171	0.000601885	18413463	10805	0.000586455
1700003C15Rik		0	0	0	0	2	0.666667	0	3	0.75
1700003D09Rik		0	0	0	0	0	0	0	0	0
Hspa8	239092	238927	165	0.000690108	1853848	3725	0.0020053	3308213	5243	0.00158234
1700003E24Rik		0	0	0	0	0	0	0	0	0
Chchd10	229887	229885	2	8.69989e-06	17934	0	0	15404	0	0
1700003G18Rik		0	0	0	0	0	0	0	0	0
1700003H04Rik		0	0	0	0	13	0.928571	0	6	0.857143
1700003I16Rik		0	2	0.666667	0	6	0.857143	0	2	0.666667
1700003I22Rik		0	0	0	0	0	0	0	0	0
1700003L19Rik		0	0	0	0	0	0	0	0	0
1700003M07Rik		0	0	0	0	4	0.8	14	27	0.642857
Ndufv2	227912	227456	456	0.00200076	210083	8751	0.039989	601716	16147	0.0261336
1700003O11Rik		0	0	0	0	0	0	0	0	0
1700003P14Rik		0	3	0.75	0	13	0.928571	0	2	0.666667
1700006A11Rik		0	0	0	0	1	0.5	0	5	0.833333
1700006F04Rik		0	0	0	0	0	0	0	0	0
1700006H21Rik		0	0	0	2	0	0	0	0	0
1700006J14Rik		0	0	0	0	0	0	0	0	0
1700006P03Rik		0	0	0	0	0	0	0	0	0
1700007E05Rik		0	0	0	0	0	0	0	0	0
1700007F19Rik		0	0	0	0	0	0	0	0	0
1700007H22Rik		0	3	0.75	0	55	0.982143	0	0	0
1700007J10Rik		0	0	0	237	19	0.07393	8	1	0.1
1700007K13Rik		0	0	0	0	0	0	334	6	0.0175953
Acaa2	224882	224580	302	0.00134292	219259	1499	0.00679021	1359120	9721	0.00710162
1700007M16Rik		0	0	0	0	0	0	0	0	0
1700007P06Rik		0	0	0	0	0	0	0	0	0
1700008A23Rik		0	0	0	0	0	0	0	0	0
1700008B11Rik		0	0	0	0	0	0	0	0	0
1700008C04Rik		0	0	0	1	26	0.928571	1	8	0.8
1700008H02Rik		0	0	0	1	0	0	4	0	0
Atp5o	223960	223869	91	0.000406321	160103	16	9.99251e-05	361778	79	0.000218318
1700008K24Rik		0	0	0	0	0	0	0	0	0
1700008N11Rik		0	0	0	0	0	0	2	0	0
1700008O03Rik		0	40	0.97561	0	5	0.833333	2	117	0.975
1700008P02Rik		0	0	0	0	0	0	0	0	0
1700009C05Rik		0	0	0	0	0	0	0	0	0
1700009J07Rik		0	0	0	0	0	0	0	0	0
1700009N14Rik		0	0	0	2	0	0	0	0	0
1700010B08Rik		0	0	0	0	20	0.952381	0	0	0
1700010B13Rik		0	0	0	2	0	0	514	1619	0.758669
1700010D01Rik		0	0	0	0	0	0	0	0	0
1700010G06Rik		0	0	0	0	0	0	0	0	0
1700010H22Rik		0	0	0	0	0	0	0	0	0
1700010I02Rik		0	49	0.98	1	1	0.333333	0	84	0.988235
1700010I14Rik		0	0	0	5	124	0.953846	103	610	0.854342
1700010J16Rik		0	165	0.993976	2	18	0.857143	0	11	0.916667
1700010K23Rik		0	0	0	0	0	0	0	0	0
1700010K24Rik		0	0	0	0	1878	0.999468	0	1806	0.999447
1700010L04Rik		0	0	0	0	0	0	0	0	0
1700010N08Rik		0	0	0	2	25	0.892857	2	62	0.953846
1700011B04Rik		0	0	0	0	8	0.888889	0	0	0
1700011C11Rik		0	9	0.9	0	8	0.888889	0	11	0.916667
1700011D18Rik		0	0	0	12	0	0	0	0	0
1700011L03Rik		0	0	0	0	0	0	0	0	0
1700011L22Rik		0	0	0	0	2	0.666667	0	343	0.997093
1700011M02Rik		0	0	0	0	0	0	0	0	0
1700012A03Rik		0	2	0.666667	0	0	0	0	2835	0.999647
1700012B07Rik		0	2	0.666667	0	5	0.833333	0	4	0.8
1700012B09Rik		0	0	0	0	8	0.888889	0	0	0
1700012C08Rik		0	0	0	0	0	0	0	0	0
1700012C14Rik		0	0	0	0	0	0	0	0	0
Mybpc3	223242	222828	414	0.00185448	9427	1	0.000106056	9477	18	0.00189553
1700012D16Rik		0	0	0	0	0	0	0	0	0
1700012E03Rik		0	0	0	0	0	0	0	0	0
Atp5j	221152	220989	163	0.000737046	474155	3520	0.00736901	570281	255	0.000446947
1700012J15Rik		0	0	0	0	2	0.666667	0	0	0
1700012J22Rik		0	0	0	0	0	0	0	0	0
1700012P22Rik		0	64	0.984615	0	5	0.833333	0	0	0
1700013A02Rik		0	0	0	0	0	0	1	0	0
1700013D24Rik		0	0	0	0	2	0.666667	1	2	0.5
1700013F07Rik		0	0	0	5	16	0.727273	236	296	0.555347
1700013G24Rik		0	0	0	0	0	0	0	0	0
1700013H16Rik		0	0	0	0	1	0.5	0	1	0.5
1700013M08Rik		0	0	0	0	0	0	0	0	0
1700013N06Rik		0	18	0.947368	0	36	0.972973	0	8	0.888889
1700014D04Rik		0	0	0	0	0	0	0	0	0
1700014F14Rik		0	0	0	0	7	0.875	0	0	0
1700014L14Rik		0	4	0.8	0	2	0.666667	0	1	0.5
1700015C15Rik		0	0	0	0	96	0.989691	53	381	0.875862
1700015C17Rik		0	0	0	0	0	0	0	0	0
1700015F17Rik		0	0	0	1	19	0.904762	196	321	0.619691
1700015G11Rik		0	0	0	0	0	0	0	0	0
1700015H07Rik		0	0	0	0	0	0	0	0	0
1700015I17Rik		0	0	0	0	16	0.941176	44	113	0.71519
1700015O11Rik		0	0	0	0	0	0	27	24	0.461538
1700016A09Rik		0	0	0	0	0	0	0	0	0
1700016B01Rik		0	0	0	0	0	0	0	0	0
1700016B15Rik		0	0	0	0	0	0	0	0	0
Cd36	218317	212220	6097	0.0279272	12467252	504210	0.0388707	20956	1521	0.0676662
1700016D06Rik		0	6	0.857143	2	382	0.992208	3	13	0.764706
1700016D08Rik		0	0	0	0	0	0	2	0	0
1700016F12Rik		0	0	0	0	0	0	0	0	0
1700016G22Rik		0	0	0	0	0	0	0	0	0
1700016H03Rik		0	0	0	0	0	0	0	0	0
1700016H13Rik		0	12	0.923077	2	0	0	46	53	0.53
Idh2	217931	217653	278	0.00127563	176385	2262	0.0126618	478986	5458	0.0112665
1700016K05Rik		0	0	0	0	0	0	0	0	0
1700016K19Rik		0	0	0	0	0	0	0	0	0
1700016L21Rik		0	6	0.857143	0	9	0.9	0	46	0.978723
1700016P03Rik		0	3	0.75	225	2289	0.910139	187	1387	0.880635
1700016P04Rik		0	0	0	1	2	0.5	0	2	0.666667
Ndufs7	215093	214842	251	0.00116693	260496	631	0.00241644	791680	2375	0.00299097
Cox5a	214760	214379	381	0.00177407	149424	2073	0.0136833	187197	10799	0.0545412
1700017I07Rik		0	0	0	0	0	0	0	0	0
1700017J07Rik		0	0	0	0	0	0	0	0	0
1700017L05Rik		0	0	0	0	0	0	0	0	0
Idh3g	213991	213946	45	0.000210288	234910	36	0.000153226	738180	480	0.000649824
1700017N19Rik		0	0	0	0	30	0.967742	0	12	0.923077
1700018A04Rik		0	9	0.9	0	42	0.976744	13	10	0.416667
1700018A14Rik		0	0	0	0	0	0	0	0	0
1700018A23Rik		0	0	0	0	0	0	0	0	0
1700018B08Rik		0	0	0	0	5	0.833333	1	52	0.962963
1700018B24Rik		0	0	0	0	68	0.985507	1	1	0.333333
1700018F24Rik		0	0	0	0	0	0	0	0	0
1700018G05Rik		0	0	0	6	11	0.611111	268	156	0.367059
Cyc1	211959	211952	7	3.30251e-05	232271	70	0.00030128	510953	184	0.000359981
Cst3	210183	209550	633	0.00301165	1701786	9844	0.00575124	9375970	45602	0.00484017
1700018P08Rik		0	0	0	0	2	0.666667	0	0	0
1700019A02Rik		0	253	0.996063	0	114	0.991304	0	685	0.998542
1700019A23Rik		0	0	0	0	0	0	0	0	0
Ndufs2	206267	206220	47	0.000227859	314528	6283	0.0195847	828264	6247	0.00748581
Ryr2	204694	138810	65884	0.321864	4360	986	0.184402	2638	5873	0.689967
1700019E08Rik		0	0	0	0	0	0	0	0	0
1700019F05Rik		0	0	0	0	10	0.909091	0	30	0.967742
1700019G24Rik		0	0	0	0	0	0	0	0	0
1700019J19Rik		0	48	0.979592	0	8	0.888889	38	13	0.25
1700019L13Rik		0	0	0	0	0	0	0	0	0
1700019M22Rik		0	0	0	0	0	0	0	0	0
1700019N19Rik		0	6	0.857143	0	3	0.75	0	2	0.666667
1700019P21Rik		0	0	0	1	0	0	0	0	0
1700020A23Rik		0	0	0	0	0	0	0	0	0
1700020D05Rik		0	0	0	0	0	0	0	0	0
1700020D12Rik		0	0	0	0	3	0.75	0	4	0.8
1700020G03Rik		0	0	0	0	0	0	0	0	0
1700020G17Rik		0	2	0.666667	0	42	0.976744	0	112	0.99115
1700020L24Rik		0	6	0.857143	0	85	0.988372	14	84	0.848485
1700020M21Rik		0	0	0	4	76	0.938272	0	0	0
1700020N01Rik		0	0	0	0	8	0.888889	0	8	0.888889
1700020N15Rik		0	0	0	0	0	0	0	0	0
1700020N18Rik		0	0	0	0	0	0	0	0	0
1700021A07Rik		0	0	0	0	0	0	0	2	0.666667
1700021F02Rik		0	0	0	0	1	0.5	92	372	0.8
1700021F07Rik		0	386	0.997416	0	0	0	0	0	0
Slc25a5	204189	204189	0	0	884338	853	0.000963633	1107007	7	6.32331e-06
1700021G15Rik		0	0	0	0	0	0	0	0	0
Ankrd1	203741	202593	1148	0.00563458	13785	66	0.00476465	16301	366	0.0219582
1700021L23Rik		0	2	0.666667	0	2	0.666667	0	0	0
1700021N21Rik		0	0	0	0	0	0	0	0	0
1700021P04Rik		0	0	0	1	0	0	0	0	0
1700022A21Rik		0	0	0	0	0	0	0	0	0
1700022A22Rik		0	1	0.5	0	6	0.857143	0	2	0.666667
1700022E09Rik		0	0	0	0	0	0	0	0	0
Ldha	203501	202972	529	0.00259948	1396030	15029	0.0106509	1998544	11120	0.00553326
1700022H16Rik		0	0	0	0	5	0.833333	3	2045	0.998048
1700022I11Rik		0	0	0	13	1	0.0666667	45	27	0.369863
Ndufb10	200443	200428	15	7.48339e-05	173344	1003	0.00575286	505229	547	0.0010815
1700023B13Rik		0	0	0	0	0	0	0	0	0
1700023C21Rik		0	0	0	0	0	0	0	1	0.5
1700023F02Rik		0	41	0.97619	0	798	0.998748	0	24	0.96
1700023G09Rik		0	0	0	0	0	0	3	2	0.333333
1700023H06Rik		0	0	0	0	0	0	22	0	0
1700024B05Rik		0	6	0.857143	0	28	0.965517	0	5	0.833333
1700024B18Rik		0	0	0	0	0	0	0	0	0
1700024G13Rik		0	16	0.941176	0	65	0.984848	0	2	0.666667
1700024I08Rik		0	55	0.982143	0	2	0.666667	0	12	0.923077
1700024J04Rik		0	0	0	147	0	0	0	0	0
1700025A08Rik		0	0	0	0	0	0	0	0	0
1700025B11Rik		0	0	0	3	0	0	0	0	0
1700025C18Rik		0	0	0	0	145	0.993151	0	0	0
1700025D23Rik		0	0	0	0	0	0	0	1	0.5
1700025F24Rik		0	0	0	0	8	0.888889	0	0	0
Idh3a	200117	199564	553	0.00276337	117999	261	0.00220698	291486	412	0.00141145
1700025H01Rik		0	0	0	0	0	0	0	0	0
1700025J12Rik		0	0	0	0	0	0	0	0	0
1700025K04Rik		0	0	0	0	0	0	0	0	0
1700025K24Rik		0	0	0	0	7	0.875	2	1	0.25
1700025L06Rik		0	0	0	0	0	0	0	0	0
1700025M24Rik		0	0	0	2	3	0.5	0	1	0.5
1700025N21Rik		0	0	0	0	0	0	0	0	0
1700025N23Rik		0	0	0	0	0	0	0	0	0
1700025O08Rik		0	245	0.995935	0	0	0	2	2	0.4
1700026D11Rik		0	1	0.5	0	2	0.666667	0	2	0.666667
1700026F02Rik		0	15	0.9375	0	74	0.986667	0	22	0.956522
1700026J12Rik		0	48	0.979592	0	9	0.9	0	77	0.987179
1700026J14Rik		0	0	0	0	0	0	0	0	0
Myl1	199562	196353	3209	0.0160801	19411	119	0.00609288	12254	278	0.0221814
1700027A07Rik		0	0	0	0	0	0	0	0	0
Sdha	197333	196888	445	0.00225506	329747	9412	0.0277509	756498	13354	0.0173462
1700027F06Rik		0	0	0	0	0	0	0	0	0
1700027F09Rik		0	0	0	0	0	0	0	0	0
1700027H10Rik		0	0	0	0	0	0	0	0	0
Cox6b1	196432	196356	76	0.0003869	248763	3709	0.0146907	495536	6875	0.013684
1700027J07Rik		0	0	0	0	14	0.933333	0	2	0.666667
1700028B04Rik		0	0	0	0	0	0	0	0	0
1700028D13Rik		0	0	0	0	0	0	0	0	0
Casq2	196396	194843	1553	0.00790745	4306	54	0.0123825	5970	12	0.00200568
Ndufa10	194093	193734	359	0.00184962	122196	3497	0.0278215	486265	8474	0.0171282
1700028I16Rik		0	0	0	0	5	0.833333	0	722	0.998617
Hspb6	192339	192321	18	9.35843e-05	27837	75	0.00268692	27231	71	0.00260045
1700028K03Rik		0	0	0	0	0	0	19	0	0
1700028M03Rik		0	4	0.8	0	13	0.928571	0	4	0.8
Cox6c	191307	191277	30	0.000156815	216727	1970	0.00900786	478221	2179	0.00453579
1700028P14Rik		0	23	0.958333	0	171	0.994186	93	178	0.654412
1700028P15Rik		0	0	0	0	0	0	0	0	0
1700029B22Rik		0	0	0	0	0	0	0	0	0
1700029B24Rik		0	0	0	0	0	0	0	0	0
Aco2	190561	189923	638	0.00334799	186185	1613	0.00858897	339651	4043	0.0117633
1700029F12Rik		0	0	0	0	1	0.5	0	0	0
1700029H14Rik		0	0	0	3	159	0.97546	388	1682	0.812168
Atp5d	190098	189660	438	0.00230406	283056	9507	0.0324955	931671	6341	0.00676003
1700029J03Rik		0	211	0.995283	0	306	0.996743	1	18	0.9
Hsp90ab1	189170	189118	52	0.000274884	2042027	6166	0.00301046	4334756	2743	0.000632392
1700029M03Rik		0	0	0	0	0	0	0	0	0
1700029M20Rik		0	0	0	0	0	0	0	0	0
1700029N11Rik		0	0	0	0	2	0.666667	3	111	0.965217
1700029P11Rik		0	0	0	2	0	0	0	0	0
1700030A11Rik		0	0	0	0	0	0	1	0	0
Got1	189158	188421	737	0.00389619	28011	1949	0.0650512	106455	2901	0.0265278
1700030C10Rik		0	0	0	0	0	0	2	0	0
Ndufb8	188504	188456	48	0.000254635	145123	384	0.00263903	340022	332	0.000975452
Ndufa9	187941	187577	364	0.00193677	189082	1124	0.00590935	512339	4622	0.0089407
1700030E10Rik		0	0	0	0	2	0.666667	1	205	0.990338
1700030F04Rik		0	39	0.975	0	18	0.947368	3	33	0.891892
1700030I03Rik		0	0	0	0	0	0	0	0	0
1700030J22Rik		0	28	0.965517	70	189	0.726923	202	2	0.0097561
Bsg	186820	186721	99	0.000529919	556331	1517	0.00271937	1663537	698	0.000419412
1700030L20Rik		0	0	0	0	0	0	0	1	0.5
1700030L22Rik		0	0	0	0	0	0	0	0	0
Uqcr11	185469	185468	1	5.39171e-06	236960	291	0.00122654	465944	1114	0.00238514
1700030N03Rik		0	150	0.993377	0	2112	0.999527	38	12201	0.996814
1700030N18Rik		0	0	0	0	0	0	0	0	0
1700030O20Rik		0	44	0.977778	0	0	0	0	0	0
1700031A10Rik		0	0	0	0	326	0.996942	1	29	0.935484
1700031F05Rik		0	0	0	0	0	0	0	2	0.666667
1700031F10Rik		0	0	0	0	0	0	0	0	0
1700031L13Rik		0	0	0	0	2	0.666667	0	0	0
1700031M16Rik		0	0	0	0	4	0.8	0	6	0.857143
1700031P21Rik		0	0	0	0	0	0	0	1	0.5
Tpi1	183652	183620	32	0.000174242	175680	7	3.98434e-05	824139	32	3.88268e-05
1700034E13Rik		0	0	0	0	6	0.857143	80	0	0
1700034G24Rik		0	0	0	0	0	0	0	2	0.666667
1700034H15Rik		0	11	0.916667	6	309	0.977848	0	223	0.995536
1700034I23Rik		0	0	0	0	0	0	0	0	0
1700034J04Rik		0	0	0	0	0	0	0	0	0
1700034J05Rik		0	0	0	0	0	0	6	0	0
1700034K08Rik		0	5	0.833333	0	1	0.5	0	14	0.933333
Des	183032	183017	15	8.19524e-05	45496	0	0	57400	15	0.000261251
Acadl	182638	181473	1165	0.0063787	163994	13142	0.0741912	466899	21269	0.0435689
1700036G14Rik		0	0	0	0	4	0.8	0	14	0.933333
1700036O09Rik		0	0	0	0	0	0	0	0	0
1700037C06Rik		0	0	0	1	0	0	0	0	0
Cs	177845	177231	614	0.00345243	153295	10584	0.0645838	359753	22532	0.0589402
1700037F03Rik		0	46	0.978723	0	3	0.75	0	1607	0.999378
Tnnc1	174946	174946	0	0	19669	28	0.00142146	9937	0	0
1700039E22Rik		0	0	0	0	0	0	0	0	0
1700039I01Rik		0	0	0	0	0	0	0	0	0
1700039M10Rik		0	0	0	0	0	0	94	68	0.417178
1700039M15Rik		0	0	0	0	0	0	0	0	0
Pkm	174757	174529	228	0.00130466	582244	5148	0.00876415	1556164	4878	0.00312483
1700040E09Rik		0	0	0	0	0	0	0	0	0
1700040F15Rik		0	0	0	0	0	0	0	0	0
1700040F17Rik		0	0	0	0	0	0	0	0	0
1700040K01Rik		0	0	0	0	0	0	0	0	0
Cycs	172701	172613	88	0.000509548	100931	562	0.00553727	190966	1075	0.00559773
1700041B01Rik		0	0	0	0	0	0	0	0	0
1700041C23Rik		0	0	0	1	2	0.5	0	4	0.8
1700041G16Rik		0	47	0.979167	832	142	0.145641	926	223	0.193913
1700041I07Rik		0	0	0	0	0	0	0	0	0
1700041M05Rik		0	4	0.8	0	0	0	0	7	0.875
1700041M19Rik		0	29	0.966667	0	175	0.994318	0	30	0.967742
1700042D02Rik		0	0	0	0	0	0	0	1	0.5
1700042G07Rik		0	0	0	0	0	0	0	0	0
1700042G15Rik		0	0	0	0	0	0	0	0	0
1700042O05Rik		0	0	0	0	10	0.909091	0	24	0.96
Rplp0	172535	172532	3	1.73877e-05	1284542	963	0.000749121	4909052	1275	0.000259657
1700044C05Rik		0	0	0	0	3	0.75	0	4	0.8
1700044K03Rik		0	0	0	0	0	0	0	0	0
1700045H11Rik		0	0	0	0	7	0.875	0	8203	0.999878
1700045I11Rik		0	0	0	0	0	0	0	0	0
1700046C09Rik		0	0	0	0	44	0.977778	0	9	0.9
1700047A11Rik		0	0	0	10	1	0.0833333	34	0	0
1700047E10Rik		0	0	0	0	0	0	0	0	0
1700047F07Rik		0	3	0.75	0	116	0.991453	0	1	0.5
1700047G03Rik		0	0	0	0	0	0	0	1	0.5
1700047G07Rik		0	0	0	0	0	0	0	0	0
1700047K16Rik		0	0	0	0	0	0	0	0	0
1700047L14Rik		0	0	0	0	0	0	0	0	0
1700047M11Rik		0	1	0.5	8	3	0.25	5168	4578	0.469683
1700047N06Rik		0	0	0	0	0	0	0	0	0
1700047O18Rik		0	0	0	0	0	0	0	0	0
1700048F04Rik		0	0	0	0	11	0.916667	0	10	0.909091
1700048M11Rik		0	0	0	0	0	0	0	0	0
1700048O14Rik		0	0	0	0	3	0.75	0	11	0.916667
Fhl2	171875	163638	8237	0.0479241	30090	864	0.0279115	36760	1596	0.0416091
1700048P04Rik		0	0	0	0	0	0	0	0	0
1700049E15Rik		0	0	0	0	115	0.991379	0	0	0
1700049E17Rik1		0	0	0	0	0	0	0	0	0
1700049E17Rik2		0	0	0	0	0	0	0	0	0
1700049E22Rik		0	0	0	0	0	0	0	0	0
1700049L16Rik		0	0	0	0	0	0	0	0	0
1700051A21Rik		0	0	0	0	0	0	0	0	0
1700051K13Rik		0	0	0	0	0	0	0	0	0
Pdhb	170439	170021	418	0.00245248	145894	2861	0.0192328	354207	3435	0.00960455
1700052H01Rik		0	10	0.909091	0	24	0.96	37	35	0.479452
1700052I22Rik		0	0	0	2	2	0.4	0	0	0
Itm2b	168774	168447	327	0.00193749	5710895	15728	0.00274647	18817043	15673	0.000832222
1700054A03Rik		0	1	0.5	1	20	0.909091	0	6132	0.999837
1700054K02Rik		0	0	0	0	0	0	0	0	0
1700054K19Rik		0	0	0	0	0	0	0	0	0
1700054M17Rik		0	0	0	0	0	0	0	0	0
1700054O05Rik		0	0	0	0	4	0.8	0	0	0
1700054O19Rik		0	0	0	14	0	0	903	0	0
1700055C04Rik		0	0	0	0	0	0	0	0	0
Ybx1	168629	168138	491	0.0029117	1059266	53886	0.0484084	1103520	38429	0.0336521
1700056E22Rik		0	0	0	0	0	0	0	0	0
1700056N10Rik		0	0	0	3513	405	0.103343	5018	668	0.117461
1700057G04Rik		0	2	0.666667	3	115	0.966387	0	10	0.909091
1700057H15Rik		0	0	0	0	34	0.971429	0	14	0.933333
1700057H21Rik		0	0	0	0	9	0.9	0	3	0.75
1700058P15Rik		0	0	0	0	68	0.985507	0	5	0.833333
1700060C16Rik		0	90	0.989011	0	1503	0.999335	0	21	0.954545
1700060C20Rik		0	0	0	1	0	0	80	0	0
1700060J05Rik		0	0	0	33	0	0	0	0	0
1700060O08Rik		0	0	0	0	0	0	0	0	0
1700061A03Rik		0	0	0	0	0	0	777	0	0
1700061E17Rik		0	0	0	0	23	0.958333	0	0	0
1700061E18Rik		0	0	0	0	0	0	0	0	0
1700061F12Rik		0	0	0	0	0	0	0	2	0.666667
1700061H18Rik		0	0	0	0	0	0	31	0	0
1700061I17Rik		0	0	0	176	1176	0.86918	1	9	0.818182
1700061J23Rik		0	0	0	0	1	0.5	1	8	0.8
1700061N14Rik		0	14	0.933333	0	235	0.995763	1	120	0.983607
1700062C10Rik		0	1	0.5	0	11	0.916667	1	1	0.333333
1700063A18Rik		0	0	0	0	1	0.5	0	5	0.833333
1700063D05Rik		0	0	0	0	54	0.981818	1	338	0.994118
1700063H04Rik		0	0	0	0	0	0	0	0	0
1700063H06Rik		0	0	0	58	48	0.448598	0	0	0
1700063I16Rik		0	0	0	0	0	0	0	0	0
1700063J08Rik		0	0	0	0	0	0	16	0	0
1700063K16Rik		0	0	0	0	0	0	0	0	0
1700063O14Rik		0	0	0	0	0	0	0	0	0
1700064H15Rik		0	71	0.986111	10	54	0.830769	111	340	0.752212
Ghitm	167018	166770	248	0.00148486	376939	822	0.00217597	822350	1905	0.00231118
1700064J06Rik		0	0	0	0	16	0.941176	0	7	0.875
Vdac1	164774	164255	519	0.00314975	135730	2310	0.0167342	497496	7212	0.0142894
1700065D16Rik		0	0	0	0	0	0	0	0	0
1700065I16Rik		0	0	0	0	0	0	0	3	0.75
1700065J11Rik		0	0	0	0	2	0.666667	9	0	0
1700065J18Rik		0	0	0	22	0	0	34	0	0
1700065L07Rik		0	0	0	0	2	0.666667	0	10	0.909091
1700065O20Rik		0	0	0	0	2	0.666667	0	2	0.666667
Cox6a2	163709	163709	0	0	9247	0	0	6154	0	0
1700066B19Rik		0	0	0	5	3784	0.998417	91	131	0.587444
1700066C05Rik		0	0	0	0	0	0	0	1	0.5
1700066J03Rik		0	0	0	0	0	0	354	0	0
Mylk3	161110	156867	4243	0.0263359	23692	190	0.00795545	20078	137	0.00677681
1700066N21Rik		0	5	0.833333	0	9	0.9	0	82	0.987952
1700066O22Rik		0	0	0	0	0	0	0	0	0
1700067G17Rik		0	0	0	0	0	0	0	0	0
Phyh	159387	158999	388	0.00243431	45011	1130	0.0244896	383476	10656	0.0270366
1700067P10Rik		0	0	0	2	0	0	0	0	0
1700069B07Rik		0	0	0	48	0	0	22	0	0
1700069L16Rik		0	10	0.909091	0	168	0.994083	0	10	0.909091
1700069P05Rik		0	0	0	0	0	0	0	0	0
1700071G01Rik		0	0	0	0	0	0	0	0	0
1700071K01Rik		0	0	0	0	0	0	0	0	0
1700071M16Rik		0	0	0	0	0	0	0	0	0
1700072B07Rik		0	0	0	0	0	0	0	0	0
1700072G22Rik		0	0	0	1	0	0	0	0	0
1700072O05Rik		0	28	0.965517	0	0	0	0	2	0.666667
1700073E17Rik		0	0	0	0	0	0	0	0	0
1700074A21Rik		0	0	0	0	0	0	0	0	0
1700074H08Rik		0	0	0	0	0	0	92	215	0.698052
1700074P13Rik		0	39	0.975	1	3	0.6	0	1	0.5
1700080C20Rik		0	0	0	0	0	0	0	0	0
1700080N15Rik		0	0	0	0	0	0	0	0	0
1700080O16Rik		0	0	0	0	0	0	0	0	0
1700081B01Rik		0	0	0	5	12	0.666667	0	41	0.97619
1700081H04Rik		0	0	0	0	0	0	0	0	0
Idh3b	159274	158877	397	0.00249254	214692	1116	0.00517124	499692	659	0.00131707
1700082M22Rik		0	52	0.981132	0	1	0.5	0	8	0.888889
1700083H02Rik		0	0	0	0	0	0	0	0	0
1700084C06Rik		0	495	0.997984	6	2697	0.997411	19	1476	0.986631
1700084D21Rik		0	0	0	0	2	0.666667	0	2	0.666667
Myoz2	158736	156478	2258	0.0142248	22430	14	0.000623747	14777	329	0.021778
1700084F23Rik		0	5	0.833333	4	41	0.891304	0	61	0.983871
1700084J12Rik		0	0	0	0	0	0	0	0	0
1700084M14Rik		0	0	0	0	0	0	0	0	0
1700085C21Rik		0	0	0	0	0	0	23	0	0
1700085D07Rik		0	0	0	6	0	0	0	0	0
1700086D15Rik		0	0	0	0	0	0	0	0	0
Smpx	158085	153824	4261	0.0269537	11671	16	0.00136893	13643	72	0.00524934
Ndufa8	156532	156409	123	0.000785777	361402	2720	0.00747	371260	63	0.000169663
Uqcrc2	154745	154421	324	0.00209375	217165	6417	0.0287008	477959	15778	0.0319562
Obscn	151823	146117	5706	0.037583	48357	1290	0.0259829	11944	346	0.0281507
1700087M22Rik		0	0	0	1	0	0	8	0	0
S100a1	150761	150621	140	0.000928616	179693	3141	0.0171794	162624	1030	0.00629373
1700091H14Rik		0	0	0	0	0	0	0	2	0.666667
1700092C02Rik		0	0	0	0	0	0	0	0	0
1700092C10Rik		0	0	0	0	0	0	0	0	0
1700092C17Rik		0	0	0	0	0	0	0	0	0
1700092E16Rik		0	0	0	0	0	0	0	0	0
1700092E19Rik		0	0	0	4	19	0.791667	0	7	0.875
1700092K14Rik		0	0	0	0	0	0	0	0	0
1700092M07Rik		0	0	0	81	0	0	85	0	0
1700093J21Rik		0	72	0.986301	0	10	0.909091	1	2267	0.999119
1700093K21Rik		0	0	0	2	0	0	21	45	0.671642
Acadvl	149276	149242	34	0.000227764	210562	450	0.00213257	637600	622	0.000974581
1700094J05Rik		0	0	0	5	0	0	1	0	0
1700094M23Rik		0	0	0	7	3108	0.997433	2	8	0.727273
1700094M24Rik		0	12	0.923077	0	16	0.941176	0	0	0
1700095A13Rik		0	34	0.971429	0	6	0.857143	0	0	0
1700095A21Rik		0	0	0	0	8	0.888889	0	10	0.909091
1700095B10Rik		0	0	0	0	0	0	0	0	0
1700095J03Rik		0	1	0.5	25	41	0.61194	7062	795	0.101171
1700095J07Rik		0	130	0.992366	0	20	0.952381	0	56	0.982456
1700095J12Rik		0	0	0	0	0	0	0	0	0
1700095K22Rik		0	6	0.857143	0	0	0	0	0	0
1700096J18Rik		0	14	0.933333	0	0	0	0	0	0
Slc25a11	148600	148596	4	2.69177e-05	128725	25	0.000194173	473258	299	0.00063139
1700097M23Rik		0	0	0	0	0	0	0	0	0
1700097N02Rik		0	0	0	0	0	0	0	0	0
1700099I09Rik		0	0	0	5	0	0	0	0	0
1700100I10Rik		0	0	0	0	0	0	0	0	0
1700100L14Rik		0	0	0	0	0	0	0	0	0
Acadm	148155	148030	125	0.000843705	95589	1247	0.0128773	313642	5275	0.0165403
1700101I19Rik		0	0	0	0	0	0	0	0	0
1700101O22Rik		0	0	0	0	11	0.916667	1	2	0.5
1700102F20Rik		0	0	0	0	0	0	0	0	0
Ndufab1	147822	147330	492	0.0033283	88402	1120	0.0125108	249896	2853	0.0112878
Cd81	146317	146185	132	0.000902145	4760133	9938	0.00208341	7175948	6761	0.000941288
Hspa5	143821	143752	69	0.00047976	960395	638	0.000663868	7858607	2889	0.000367487
1700104L18Rik		0	0	0	0	0	0	0	6	0.857143
1700105G05Rik		0	0	0	0	0	0	0	0	0
Malat1	143442	143442	0	0	3936917	5	1.27003e-06	8707633	20	2.29683e-06
1700106O07Rik		0	0	0	0	0	0	0	0	0
Ndufb5	141049	140752	297	0.00210564	129156	9	6.96778e-05	321051	48	0.000149486
1700108J01Rik		0	0	0	0	0	0	0	0	0
1700108N06Rik		0	0	0	0	0	0	0	2	0.666667
1700108N11Rik		0	0	0	0	0	0	0	0	0
1700109G14Rik		0	0	0	0	279	0.996429	0	136	0.992701
1700109G15Rik		0	0	0	0	215	0.99537	0	4	0.8
Ndufa4	140342	140246	96	0.000684038	130074	6	4.61251e-05	213698	568	0.0026509
1700109I08Rik		0	0	0	0	8	0.888889	1	0	0
1700109K24Rik		0	0	0	0	0	0	0	0	0
Uqcrb	140301	140263	38	0.000270844	208148	1477	0.00704588	411586	1416	0.00342855
1700110I01Rik		0	0	0	0	29	0.966667	0	0	0
1700110I07Rik		0	0	0	1	5	0.714286	1	4	0.666667
1700110K17Rik		0	0	0	0	0	0	0	0	0
1700111E14Rik		0	0	0	0	0	0	0	0	0
1700111N16Rik		0	9	0.9	0	41	0.97619	0	296	0.996633
Ubb	139897	139897	0	0	1783164	477	0.00026743	4774760	3565	0.000746077
1700112H15Rik		0	0	0	0	5	0.833333	0	18	0.947368
1700112J05Rik		0	0	0	0	0	0	0	7	0.875
1700112J16Rik		0	0	0	0	2	0.666667	644	300	0.31746
1700112K13Rik		0	0	0	0	0	0	0	0	0
1700112L15Rik		0	0	0	0	0	0	0	0	0
1700112M02Rik		0	0	0	0	930	0.998926	0	100	0.990099
Pygm	137643	137513	130	0.000944465	124417	5150	0.0397475	99179	6498	0.0614887
1700113B09Rik		0	0	0	0	0	0	0	77	0.987179
1700113B19Rik		0	0	0	0	0	0	0	0	0
1700113H08Rik		0	30	0.967742	0	986	0.998987	1	432	0.995392
1700116B05Rik		0	0	0	0	0	0	0	0	0
1700116H05Rik		0	0	0	0	0	0	0	0	0
1700119H24Rik		0	0	0	13	0	0	0	0	0
Etfa	136778	135499	1279	0.00935085	97551	11695	0.107051	684875	77088	0.10117
Oxct1	135583	134980	603	0.00444743	97616	6639	0.0636798	760726	27857	0.0353253
Sdhd	135022	134928	94	0.000696178	203664	3648	0.0175966	505769	1477	0.0029118
1700120C18Rik		0	0	0	0	0	0	0	0	0
1700120E14Rik		0	0	0	0	0	0	0	0	0
1700120G07Rik		0	0	0	0	0	0	0	0	0
Ndufb9	134085	134084	1	7.4579e-06	123843	667	0.00535696	325352	2470	0.00753455
1700120K04Rik		0	0	0	0	0	0	0	0	0
1700120O09Rik		0	0	0	0	0	0	0	0	0
1700121C08Rik		0	0	0	0	4	0.8	0	8	0.888889
1700121L03Rik		0	0	0	0	0	0	0	2	0.666667
1700121L16Rik		0	0	0	0	0	0	0	0	0
Ctsb	132862	132791	71	0.000534385	952923	5989	0.00624561	4682900	11672	0.00248628
1700122C19Rik		0	0	0	0	0	0	0	0	0
1700122D07Rik		0	0	0	0	0	0	0	0	0
1700122E12Rik		0	0	0	0	0	0	1	0	0
1700122H20Rik		0	0	0	15	42	0.724138	0	710	0.998594
1700122O11Rik		0	0	0	0	0	0	0	0	0
1700123J17Rik		0	0	0	0	63	0.984375	0	0	0
1700123K08Rik		0	0	0	0	0	0	14	0	0
1700123L14Rik		0	0	0	0	0	0	0	0	0
Map1lc3a	132239	132177	62	0.000468845	87600	54	0.000616052	457799	1174	0.00255788
1700123O12Rik		0	42	0.976744	0	297	0.996644	0	43	0.977273
Eif1	131639	131639	0	0	565228	12	2.12299e-05	1427941	75	5.25204e-05
1700123O21Rik		0	0	0	0	0	0	0	0	0
Ak1	130622	130338	284	0.0021742	17140	633	0.0356138	315666	200	0.000633178
1700124M09Rik		0	0	0	0	1	0.5	1	2	0.5
1700125G02Rik		0	0	0	0	0	0	0	0	0
1700125G22Rik		0	0	0	0	0	0	0	0	0
1700125H03Rik		0	0	0	0	0	0	0	0	0
1700125H20Rik		0	1	0.5	0	33	0.970588	0	127	0.992188
1700126A01Rik		0	0	0	0	0	0	0	0	0
1700126G02Rik		0	0	0	0	0	0	0	0	0
1700126H18Rik		0	0	0	0	1	0.5	0	5	0.833333
1700127F24Rik		0	0	0	0	0	0	0	0	0
1700128A07Rik		0	5	0.833333	0	14	0.933333	1	362	0.994505
1700128E19Rik		0	0	0	42	32	0.426667	0	1	0.5
1700128F08Rik		0	0	0	0	0	0	0	1	0.5
1700128I11Rik		0	0	0	0	0	0	0	0	0
1700129C05Rik		0	0	0	0	0	0	0	2	0.666667
1700129L04Rik		0	0	0	0	0	0	0	0	0
Eef2	128422	128395	27	0.000210243	1309838	474	0.000361746	3278785	1065	0.00032471
1810007C17Rik		0	0	0	0	0	0	0	0	0
1810007D17Rik		0	10	0.909091	0	0	0	0	48	0.979592
1810008B01Rik		0	0	0	0	0	0	0	0	0
Ldb3	124156	120243	3913	0.0315165	5698	102	0.0175832	7947	3754	0.3208
Gstm1	123818	123772	46	0.00037151	1188418	1739	0.00146115	13395583	6320	0.000471575
1810009J06Rik		0	0	0	0	0	0	0	0	0
Rrad	122517	121891	626	0.00510945	18496	3	0.000162162	145765	83	0.000569082
1810010K12Rik		0	0	0	0	0	0	0	0	0
1810012K08Rik		0	0	0	2	0	0	0	0	0
Pfkm	122364	121668	696	0.0056879	30014	1165	0.0373637	83279	3017	0.0349607
Prdx2	121370	121265	105	0.000865116	213202	7	3.28315e-05	847338	492	0.000580304
Dkk3	120637	119916	721	0.00597656	3994	102	0.0248963	1534798	20997	0.013496
Mrpl42	119464	119147	317	0.0026535	99108	3325	0.0324599	245760	1796	0.00725489
1810014P07Rik		0	0	0	0	0	0	2	0	0
1810017P11Rik		0	0	0	0	0	0	0	0	0
1810018F18Rik		0	0	0	0	2	0.666667	0	0	0
Zbtb20	118671	97898	20773	0.175046	613214	389191	0.388257	4853914	1667649	0.255713
Cnbp	118484	117523	961	0.00811073	1251449	9713	0.00770162	3565267	22391	0.00624112
1810020O05Rik		0	4	0.8	0	237	0.995798	38	109	0.736486
Acat1	117732	116974	758	0.0064383	156078	7522	0.0459777	817165	14684	0.0176522
Cox5b	116365	116363	2	1.71872e-05	110876	910	0.00814048	233581	1824	0.00774832
Cox7b	115628	114520	1108	0.00958237	65376	6926	0.0957913	214670	9949	0.0442926
1810028F09Rik		0	0	0	0	0	0	0	0	0
Ndufs8	115439	115422	17	0.000147263	175873	4158	0.0230959	360125	2138	0.00590177
Rpl4	115140	115132	8	6.948e-05	1096912	317	0.000288909	4572767	846	0.000184974
1810035K13Rik		0	0	0	2	0	0	0	0	0
Cox7a2	113381	112023	1358	0.0119772	165926	8047	0.046254	313770	16339	0.0494956
Ndufb7	112992	112984	8	7.08008e-05	162787	22	0.000135127	315596	41	0.000129896
Dcn	111433	111248	185	0.00166018	287369	40	0.000139174	96670567	294198	0.00303407
1810044K17Rik		0	0	0	0	0	0	0	0	0
1810046K07Rik		0	4	0.8	1	399	0.995012	0	11	0.916667
Map1lc3b	111079	111075	4	3.60101e-05	841145	1489	0.00176708	2316652	278	0.000119986
1810049J17Rik		0	0	0	0	0	0	2	0	0
1810053B23Rik		0	54	0.981818	0	252	0.996047	0	0	0
Tuba4a	110277	110270	7	6.34759e-05	60722	38	0.000625401	24446	4	0.000163592
Hspb1	109139	108896	243	0.0022265	1028974	7916	0.00763436	906113	7462	0.0081679
1810058N15Rik		0	0	0	0	0	0	0	0	0
1810059C17Rik		0	0	0	0	0	0	191	144	0.428571
Tsc22d1	109003	108387	616	0.00565117	1727868	33250	0.01888	1008460	49140	0.0464636
Rps2	109001	109001	0	0	531217	84	0.000158102	2059753	133	6.45666e-05
Pdha1	108802	108742	60	0.000551455	78874	2112	0.0260783	315814	6402	0.0198686
1810063I02Rik		0	0	0	0	0	0	0	0	0
1810064F22Rik		0	0	0	0	1	0.5	0	2	0.666667
1810065E05Rik		0	0	0	16	189	0.917476	906	2	0.00220022
1810073O08Rik		0	0	0	6728	0	0	840	0	0
Prdx1	108542	108488	54	0.000497499	716778	4779	0.00662317	2389455	13313	0.00554069
Nudt4	108480	107670	810	0.00746675	234666	8170	0.033644	196858	32149	0.140384
2010001M07Rik		0	0	0	0	0	0	0	0	0
Mpc2	106462	106336	126	0.00118351	59112	1095	0.018187	364314	7122	0.0191742
Gpx4	106179	106133	46	0.000433227	370005	600	0.00161897	875852	856	0.000976379
2010008C14Rik		0	0	0	0	0	0	27	0	0
2010009K17Rik		0	0	0	0	0	0	0	0	0
2010010A06Rik		0	0	0	0	393	0.997462	0	552	0.998192
2010013B24Rik		0	0	0	185	1133	0.858984	206	920	0.816327
2010016I18Rik		0	0	0	1	0	0	17	0	0
2010103J01Rik		0	0	0	0	0	0	0	0	0
2010106C02Rik		0	0	0	25	0	0	0	0	0
2010106E10Rik		0	0	0	0	6	0.857143	0	14	0.933333
2010106G04Rik		0	0	0	0	0	0	0	0	0
Ndufb11	104656	104656	0	0	143460	32	0.000223007	461786	725	0.00156753
2010109P13Rik		0	0	0	0	0	0	0	0	0
2010110E17Rik		0	0	0	0	0	0	0	0	0
2010110G14Rik		0	8	0.888889	1	138	0.985714	0	325	0.996933
2010110K18Rik		0	0	0	0	5	0.833333	91	4	0.0416667
2010203P06Rik		0	0	0	0	0	0	0	0	0
Vdac3	104580	104439	141	0.00134824	249469	11348	0.0435093	711990	9807	0.0135869
Coq8a	102314	101309	1005	0.00982261	21540	69	0.00319297	56243	334	0.00590335
2010308F09Rik		0	2	0.666667	0	710	0.998594	0	389	0.997436
2010309G21Rik		0	75	0.986842	0	16	0.941176	2	16	0.842105
2010310C07Rik		0	1	0.5	247	58	0.189542	37	800	0.954654
Atp5j2	102311	102241	70	0.000684182	149377	10268	0.0643173	298701	4403	0.0145263
Pcp4l1	102209	101763	446	0.00436357	207516	655	0.00314644	9897	5	0.000504898
Adprhl1	101921	100266	1655	0.0162379	15065	1	6.63702e-05	8708	7	0.000803121
2200002A13Rik		0	0	0	0	0	0	0	0	0
Fh1	101359	101281	78	0.000769534	100875	3202	0.0307654	286994	1756	0.00608136
Gpi1	100348	100318	30	0.000298957	369474	5581	0.0148804	720738	4964	0.00684026
2200007N16Rik		0	0	0	0	0	0	0	0	0
2210009P08Rik		0	0	0	1	0	0	0	0	0
2210010C04Rik		0	0	0	26	16	0.372093	96	187	0.658451
2210011K15Rik		0	0	0	0	2	0.666667	0	0	0
Uqcrh	99022	99012	10	0.000100987	103863	1602	0.0151897	284506	6484	0.0222825
Cisd1	98753	98740	13	0.00013164	60775	94	0.00154427	160926	406	0.00251653
2210017I01Rik		0	0	0	0	10	0.909091	0	6	0.857143
2210020O09Rik		0	0	0	0	0	0	0	0	0
2210039B01Rik		0	0	0	1	0	0	62	0	0
2210404E10Rik		0	0	0	0	0	0	0	0	0
2210406H18Rik		0	0	0	0	0	0	0	0	0
Coq9	98491	98359	132	0.00134021	61034	3523	0.0545711	223523	3345	0.0147442
Atp5g3	98394	98344	50	0.000508156	94139	24	0.000254874	228482	108	0.00047246
Sucla2	98215	97883	332	0.0033803	112837	11830	0.094892	345495	31598	0.0837934
Etfdh	96910	96718	192	0.0019812	93277	3719	0.0383414	252261	4373	0.0170398
Sod2	96811	96574	237	0.00244804	78323	1376	0.0172647	146043	3240	0.0217036
2210409E12Rik		0	0	0	0	0	0	0	0	0
Vdac2	96653	96198	455	0.00470751	314404	5887	0.0183801	671803	5141	0.00759441
2210412B16Rik		0	0	0	0	0	0	0	0	0
2210414B05Rik		0	0	0	16	89	0.839623	0	1	0.5
2210414F02Rik		0	0	0	0	0	0	0	0	0
2210417A02Rik		0	0	0	0	0	0	1	0	0
2210418O10Rik		0	0	0	9	0	0	57	8	0.121212
2210420H20Rik		0	0	0	0	2	0.666667	0	0	0
2300002M23Rik		0	0	0	0	0	0	0	0	0
2300003K06Rik		0	0	0	4	0	0	0	0	0
Rcan2	94643	89492	5151	0.054425	8412	1280	0.132054	29639	12290	0.293108
Cmya5	94348	91787	2561	0.0271439	1869	657	0.259992	4714	1589	0.252062
2310001K20Rik		0	0	0	0	0	0	0	0	0
Srl	94046	93606	440	0.00467851	4110	580	0.123641	2527	3242	0.561872
Ndufs6	93481	93477	4	4.2789e-05	124942	40	0.000320044	313806	230	0.000732398
Immt	93370	93299	71	0.000760407	193365	9155	0.0452052	402756	15094	0.0361229
2310002F09Rik		0	11	0.916667	164	5489	0.970817	0	1288	0.999224
Tecr	92524	88845	3679	0.0397622	96922	9538	0.0895915	718151	15415	0.0210138
2310003L06Rik		0	0	0	0	0	0	0	0	0
2310003N18Rik		0	0	0	0	0	0	0	0	0
2310005A03Rik		0	0	0	0	0	0	0	0	0
2310005E17Rik		0	0	0	0	2	0.666667	0	152	0.993464
Pink1	92360	92278	82	0.000887821	338720	863	0.00254134	927279	1051	0.00113214
Chchd2	92017	92017	0	0	252233	0	0	612597	0	0
Nppb	91704	90736	968	0.0105556	4989	0	0	3087	0	0
Ndufs1	90931	90519	412	0.00453086	53887	13186	0.196589	150553	19304	0.113648
Hspb7	90674	90661	13	0.000143369	14651	2	0.000136482	43427	0	0
Pdk2	90368	90175	193	0.00213569	48303	513	0.0105086	213098	299	0.00140114
Ehd4	90323	86496	3827	0.0423697	136986	12778	0.0853203	71723	4044	0.0533735
Ndufa12	89942	89931	11	0.0001223	66879	2392	0.0345305	174349	1316	0.00749149
Myom2	89257	86199	3058	0.0342602	8020	1104	0.120986	2492	4	0.00160192
Fkbp4	88838	88798	40	0.000450253	378054	1715	0.00451589	884774	446	0.000503829
Uqcrq	88180	88083	97	0.00110001	81383	5221	0.0602852	141941	6663	0.044837
Cox7a1	87486	86705	781	0.00892704	11241	139	0.0122133	14749	262	0.0174527
Popdc2	86523	86327	196	0.00226527	3044	118	0.0373064	65695	1490	0.0221772
Eif5a	86065	86031	34	0.000395046	598925	45	7.51288e-05	2023874	472	0.000233162
Prdx3	85708	85689	19	0.00022168	85806	36	0.00041937	411903	408	0.000989542
2310026I22Rik		0	127	0.992188	0	5	0.833333	2	8	0.727273
2310026L22Rik		0	0	0	60	0	0	228	0	0
2310030A07Rik		0	0	0	0	0	0	0	3	0.75
Uqcr10	85276	85212	64	0.000750495	106656	1323	0.0122523	237755	1319	0.0055171
Hspa9	85044	84937	107	0.00125816	189749	2647	0.013758	651330	15877	0.0237962
2310034C09Rik		0	0	0	0	0	0	0	0	0
2310034G01Rik		0	0	0	0	0	0	0	0	0
2310034O05Rik		0	0	0	0	0	0	0	0	0
Pde4dip	84844	74958	9886	0.116518	6048	21931	0.78381	31996	67083	0.677059
Nipsnap2	84437	84106	331	0.00392004	64255	9880	0.133269	246896	20276	0.0758909
2310040G07Rik		0	0	0	0	0	0	0	0	0
Oaz1	83838	83838	0	0	338260	0	0	1222763	7	5.7247e-06
2310043L19Rik		0	0	0	0	0	0	0	0	0
2310043M15Rik		0	0	0	0	0	0	0	0	0
2310043O21Rik		0	7	0.875	0	1257	0.999205	2	9	0.75
2310043P16Rik		0	0	0	0	0	0	0	0	0
2310044K18Rik		0	0	0	0	0	0	0	0	0
2310046K23Rik		0	0	0	0	0	0	0	0	0
Mfn2	83188	82144	1044	0.0125497	46657	3289	0.0658498	95764	18831	0.164325
2310050C09Rik		0	0	0	0	0	0	0	0	0
2310057J18Rik		0	0	0	0	0	0	0	1	0.5
Suclg1	83112	83030	82	0.000986609	106536	6001	0.0533242	355815	5510	0.0152494
2310057N15Rik		0	0	0	0	0	0	2	0	0
Art3	82974	79567	3407	0.0410606	144344	8323	0.054517	36231	10758	0.228942
Bmp10	82663	82596	67	0.00081051	90	0	0	1083	0	0
2310061N02Rik		0	0	0	0	0	0	0	0	0
2310065F04Rik		0	0	0	0	0	0	1	4	0.666667
2310067P03Rik		0	108	0.990826	0	373	0.997326	0	368	0.99729
2310068J16Rik		0	0	0	0	0	0	0	0	0
Hadh	82163	81685	478	0.00581763	123287	92	0.000745664	486177	183	0.000376264
Doc2g	81796	81771	25	0.000305635	10224	0	0	7969	85	0.0105525
Ndufa5	81374	81290	84	0.00103226	53589	138	0.00256849	229283	154	0.000671205
2310079G19Rik		0	0	0	0	0	0	0	0	0
2310081O03Rik		0	0	0	0	0	0	1	0	0
2400006E01Rik		0	0	0	0	0	0	16	26	0.604651
Mgst3	81257	81066	191	0.00235054	71548	1583	0.0216458	98415	1633	0.016322
2410003I16Rik		0	0	0	0	0	0	0	0	0
2410003L11Rik		0	2	0.666667	0	139	0.992857	985	72	0.0680529
Asb2	81256	79073	2183	0.0268654	361	11	0.0294906	123446	6374	0.0490984
2410004I01Rik		0	0	0	50	0	0	30204	552	0.0179471
Fndc5	80142	79992	150	0.00187165	9665	30	0.00309406	80611	167	0.00206737
Ctnna1	79946	74518	5428	0.067895	854913	126841	0.129198	635135	103357	0.139957
2410012E07Rik		0	0	0	0	0	0	0	2	0.666667
2410017I17Rik		0	0	0	0	0	0	87	4	0.0434783
Nebl	79539	76219	3320	0.04174	13606	28494	0.676801	1149	507	0.305975
2410021H03Rik		0	0	0	0	0	0	1	0	0
Sdhc	79003	78544	459	0.00580983	98209	8287	0.0778144	292052	9424	0.0312594
2410024N13Rik		0	0	0	0	0	0	0	0	0
Csde1	78997	78784	213	0.00269627	317805	5116	0.0158428	664932	14514	0.0213615
Crat	78367	78333	34	0.000433851	65970	362	0.00545731	248424	4008	0.0158775
Tmod1	78260	77395	865	0.0110528	4302	3934	0.477601	7437	3256	0.30447
Psmb6	78086	78085	1	1.28062e-05	398035	652	0.00163536	1085784	77	7.09114e-05
2410141K09Rik		0	0	0	0	0	0	0	0	0
2410152P15Rik		0	31	0.96875	0	13	0.928571	3	9	0.692308
Ppp1ca	77970	77970	0	0	664679	164	0.000246674	1419426	22	1.5499e-05
Saraf	77303	77236	67	0.000866708	631356	4214	0.00663026	1713604	11575	0.00670944
Arf1	77107	76863	244	0.00316439	1177934	13555	0.0113765	2939360	11513	0.00390156
Got2	76787	76536	251	0.00326874	116978	519	0.0044171	308006	4253	0.0136201
2510016D11Rik		0	0	0	0	0	0	0	0	0
2510017J16Rik		0	0	0	1	0	0	0	0	0
Ndufs3	76732	76287	445	0.00579933	90267	14690	0.139961	284011	23599	0.076717
Trdn	76005	58602	17403	0.228969	4834	908	0.158106	3415	3180	0.48211
2600002D14Rik		0	0	0	0	0	0	0	0	0
Sqstm1	75855	75814	41	0.000540498	690067	12791	0.0181985	3166510	21411	0.00671629
Atp5e	75394	74981	413	0.00547782	88548	1	1.12931e-05	247056	331	0.00133798
2610001A08Rik		0	0	0	0	0	0	0	0	0
Ndufa11	74206	74160	46	0.000619888	53076	15	0.000282528	154616	915	0.00588303
Hadha	74151	73368	783	0.0105594	98437	962	0.00967807	338551	8596	0.0247618
Dusp1	73299	72875	424	0.00578445	3146870	15243	0.00482051	6243109	13098	0.0020936
Adipor1	73170	72945	225	0.00307499	921492	24776	0.0261828	599377	15202	0.0247356
2610011E03Rik		0	0	0	0	0	0	0	0	0
2610012C04Rik		0	0	0	0	0	0	0	0	0
2610016A17Rik		0	0	0	0	0	0	0	0	0
Ube2d3	73123	73039	84	0.00114873	553765	1390	0.0025038	1343660	3894	0.00288968
2610020C07Rik		0	554	0.998198	193	6277	0.97002	848	20013	0.959304
Prkar1a	73099	72245	854	0.0116826	618385	26022	0.0403812	1353750	40812	0.0292651
2610024D14Rik		0	0	0	0	0	0	0	0	0
2610027F03Rik		0	2	0.666667	1	24	0.923077	0	52	0.981132
Trp53inp2	72672	72449	223	0.00306854	80020	3988	0.0474711	107087	22852	0.175866
2610028D06Rik		0	0	0	0	0	0	0	0	0
2610028E06Rik		0	0	0	3	19	0.826087	1	2	0.5
Mtus2	72563	71722	841	0.0115898	7540	892	0.105775	10948	5153	0.320022
2610034O05Rik		0	0	0	0	0	0	0	0	0
Ndufa13	72138	72138	0	0	61841	0	0	228453	0	0
2610035F20Rik		0	0	0	1	3	0.6	0	0	0
Dsp	71455	71221	234	0.00327474	1090	52	0.0454943	7069	469	0.0622098
2610042L04Rik		0	0	0	17	1106	0.983986	2	2	0.4
Myom1	71031	63807	7224	0.101701	4524	552	0.108726	2289	327	0.124952
2610105M22Rik		0	0	0	14	0	0	0	0	0
Ndufa2	71008	71006	2	2.81654e-05	117018	45	0.000384405	355405	438	0.00123088
Acta2	70801	70572	229	0.00323437	4904	6	0.00122175	201056	6293	0.0303497
2610206C17Rik		0	4	0.8	9	165	0.942857	66	1184	0.946443
2610300A13Rik		0	0	0	0	0	0	0	0	0
2610300M13Rik		0	1	0.5	0	4	0.8	0	14	0.933333
Ndufs4	70768	68652	2116	0.0299001	98339	31636	0.243399	272143	79414	0.225892
2610303G11Rik		0	0	0	0	0	0	0	0	0
Eif4g2	70443	70408	35	0.000496849	242398	940	0.00386292	367986	1311	0.00354998
2610306O10Rik		0	0	0	0	0	0	0	0	0
2610307P16Rik		0	370	0.997305	1702	107604	0.98442	854	108346	0.99217
Cdh13	69970	64598	5372	0.0767747	861903	343634	0.285046	15461	4967	0.243135
2610318M16Rik		0	0	0	0	0	0	0	0	0
2610318N02Rik		0	0	0	0	0	0	4	3	0.375
Cfl2	69380	69374	6	8.6479e-05	90996	2491	0.0266451	264412	5958	0.0220364
Fxyd1	69349	68846	503	0.00725306	4167	18	0.00430005	613521	3821	0.00618943
2610509F24Rik		0	0	0	0	0	0	0	0	0
Ndufa1	68960	68947	13	0.000188512	106468	23	0.000215979	265294	378	0.0014228
Pdlim5	68076	58163	9913	0.145615	81199	133528	0.621847	181995	156743	0.462725
2700029L08Rik		0	0	0	0	0	0	0	0	0
Ndrg4	67845	67487	358	0.00527666	10286	5	0.000485814	159880	981	0.00609839
Dazap2	67741	67446	295	0.00435476	742132	6337	0.00846661	1286076	6579	0.00508952
Txlnb	67630	65990	1640	0.0242492	10678	1108	0.0940019	7659	11	0.00143397
Rpsa	67499	67499	0	0	599022	226	0.000377139	3473776	215	6.18885e-05
Ndufa6	67483	67482	1	1.48183e-05	140093	3031	0.0211773	384007	1559	0.0040434
Pygb	67338	66694	644	0.00956355	44844	4328	0.0880158	232943	16944	0.0678064
Tpt1	67258	67186	72	0.00107049	452626	9055	0.0196131	1389899	15604	0.0111021
2700068H02Rik		0	0	0	0	0	0	20	0	0
2700069I18Rik		0	6	0.857143	0	44	0.977778	0	32	0.969697
2700078F05Rik		0	0	0	0	0	0	0	0	0
2700080J24Rik		0	0	0	0	0	0	77	0	0
Eci1	66397	66238	159	0.00239465	109823	411	0.0037284	235296	1985	0.00836557
2700089I24Rik		0	0	0	0	1839	0.999457	0	16	0.941176
Rpl13	66121	66119	2	3.02471e-05	850692	134	0.000157494	3194902	365	0.000114231
Polr2m	66038	65349	689	0.0104332	301103	2404	0.00792071	739164	5353	0.00718989
Fgf12	65689	29605	36084	0.549307	1214	533	0.30492	5902	14603	0.712133
Rabac1	65587	65562	25	0.000381167	487852	3055	0.00622316	1818149	3171	0.00174104
Ptp4a2	65389	65041	348	0.00532191	441748	43203	0.0890872	1466631	47101	0.0311158
Oat	65174	65037	137	0.00210203	352385	2703	0.00761218	3013953	6699	0.00221773
Gm28437	65169	65169	0	0	124928	0	0	71101	0	0
Kcnj3	64092	35604	28488	0.444479	6	49	0.875	264	46	0.14791
Psap	64020	63373	647	0.0101061	2521453	1337	0.000529969	5004476	3061	0.000611278
Mlf1	63958	63031	927	0.0144937	8338	766	0.0841296	5394	440	0.075407
2810029C07Rik		0	0	0	876	8	0.00903955	1934	65	0.0325
2810030D12Rik		0	0	0	0	0	0	0	2	0.666667
2810032G03Rik		0	46	0.978723	2	955	0.996868	111	376	0.770492
Cpe	63656	63502	154	0.00241922	69081	2329	0.032614	1143736	13568	0.0117238
2810047C21Rik1		0	0	0	53	6	0.1	462	86	0.156648
2810049E08Rik		0	0	0	0	53	0.981481	0	3	0.75
Ces1d	63272	62266	1006	0.0158994	5685	60	0.010442	627146	364	0.00058007
Ucp2	62401	62400	1	1.60251e-05	293938	219	0.000744498	40306	2	4.96167e-05
2810403G07Rik		0	0	0	0	0	0	77	66	0.458333
2810404F17Rik		0	0	0	0	0	0	0	0	0
2810404M03Rik		0	46	0.978723	0	139	0.992857	0	31	0.96875
2810405F15Rik		0	0	0	0	0	0	0	0	0
Calm2	62154	61569	585	0.00941195	811602	43468	0.0508355	3241468	94673	0.028378
Hibadh	62136	61332	804	0.0129392	77581	7436	0.0874638	419595	24743	0.055685
Chpt1	62111	61280	831	0.0133791	34379	1426	0.0398257	307433	14672	0.0455502
2810408I11Rik		0	1	0.5	746	624	0.455142	1105	721	0.394636
Ndufb6	61996	61987	9	0.000145168	72748	833	0.0113207	218939	2944	0.0132682
Nedd4	61915	59429	2486	0.0401512	575344	52483	0.0835946	2709710	205757	0.0705743
2810428J06Rik		0	0	0	369	0	0	831	0	0
2810429I04Rik		0	2	0.666667	101	238	0.7	2	236	0.987448
2810430I11Rik		0	0	0	0	0	0	9943	19	0.00190706
2810432F15Rik		0	0	0	0	0	0	0	0	0
2810433D01Rik		0	0	0	2	0	0	6130	2712	0.306683
2810442N19Rik		0	0	0	0	0	0	199	0	0
Slc25a12	61875	59406	2469	0.0399024	61630	19472	0.24009	231607	59008	0.203045
2810455O05Rik		0	0	0	78	7	0.0813953	3	0	0
2810457G06Rik		0	0	0	0	0	0	0	0	0
Cope	61772	61685	87	0.00140838	338010	253	0.000747937	1312600	2269	0.00172565
2810471M01Rik		0	0	0	0	0	0	1	3	0.6
2900002M20Rik		0	0	0	0	0	0	0	0	0
2900005J15Rik		0	0	0	782	6	0.00760456	22688	2355	0.0940345
Zfp106	61422	60172	1250	0.0203507	76102	15546	0.169625	209727	43140	0.170603
2900018N21Rik		0	0	0	0	0	0	0	0	0
2900022M07Rik		0	0	0	0	0	0	0	0	0
2900024D18Rik		0	0	0	0	0	0	0	0	0
Sparc	61322	60632	690	0.0112519	6212277	20164	0.00323533	14487066	41382	0.00284834
2900027M19Rik		0	0	0	0	0	0	0	0	0
2900035J10Rik		0	0	0	0	0	0	0	0	0
2900037B21Rik		0	0	0	0	0	0	0	0	0
2900040C04Rik		0	0	0	0	0	0	0	0	0
Apoe	61044	61039	5	8.19068e-05	754840	171	0.000226486	41217771	4737	0.000114913
2900042G08Rik		0	0	0	0	0	0	0	0	0
2900042K21Rik		0	0	0	0	0	0	0	0	0
2900045O20Rik		0	4	0.8	0	4	0.8	24	754	0.967908
Fbln1	60719	60653	66	0.00108696	97383	122	0.00125121	23940636	52898	0.00220468
2900052N01Rik		0	0	0	0	1	0.5	0	1	0.5
2900057B20Rik		0	0	0	0	0	0	114	0	0
2900060B14Rik		0	0	0	0	0	0	0	0	0
2900060N12Rik		0	108	0.990826	7	12	0.6	0	75	0.986842
2900064F13Rik		0	0	0	0	0	0	0	0	0
2900064K03Rik		0	0	0	0	0	0	0	0	0
2900069G24Rik		0	0	0	0	0	0	0	0	0
2900072N19Rik		0	0	0	0	0	0	0	0	0
Ndufc2	60546	60187	359	0.00592928	166440	2455	0.0145356	293713	1570	0.00531692
2900076G11Rik		0	0	0	0	0	0	18	0	0
2900078I11Rik		0	0	0	0	0	0	0	0	0
2900079G21Rik		0	8	0.888889	4	600	0.991736	1	23	0.92
Hint1	60159	59399	760	0.012633	176704	8010	0.0433641	510455	9937	0.0190952
2900092C05Rik		0	0	0	0	9	0.9	0	1	0.5
2900092N22Rik		0	0	0	0	0	0	0	0	0
2900092O11Rik		0	0	0	61	0	0	0	0	0
2900093K20Rik		0	0	0	0	0	0	8	0	0
Mpc1	59735	58302	1433	0.0239889	39430	11183	0.220947	149670	13072	0.080323
Chchd3	59635	54816	4819	0.0808069	77753	59573	0.433804	167392	136634	0.449414
Atp5mpl	59576	59543	33	0.000553905	64574	744	0.0113903	190884	306	0.00160049
Rpl18a	59300	59300	0	0	887599	805	0.000906118	2766962	712	0.000257256
Mrpl12	58691	58669	22	0.000374838	98662	162	0.00163926	240367	1116	0.00462142
Myl9	58592	58378	214	0.00365231	9027	1	0.000110754	494983	12810	0.0252268
3110004A20Rik		0	0	0	0	0	0	0	0	0
3110006O06Rik		0	0	0	0	0	0	0	0	0
Myzap	58068	56483	1585	0.0272951	106663	27592	0.205518	11563	1084	0.0857052
3110009F21Rik		0	0	0	2	95	0.969388	0	1	0.5
3110009M11Rik		0	0	0	6	0	0	1	0	0
3110015C05Rik		0	0	0	0	10	0.909091	0	1	0.5
3110018I06Rik		0	0	0	0	0	0	0	0	0
Tango2	58049	55793	2256	0.038863	23659	8859	0.272425	210867	34374	0.140164
Ndufa7	57952	57909	43	0.000741981	144685	3966	0.0266798	421688	2706	0.00637614
3110039M20Rik		0	0	0	0	6	0.857143	0	0	0
3110040M04Rik		0	0	0	0	0	0	0	0	0
Dst	57936	53629	4307	0.0743394	161455	134663	0.45476	271573	220316	0.447897
3110043J17Rik		0	0	0	7	0	0	0	0	0
Tmem182	57758	57283	475	0.00822383	75139	2219	0.0286844	229	4	0.017094
Pdia3	57751	57353	398	0.00689154	1362670	3545	0.00259476	7026933	13705	0.00194656
Dld	57513	57119	394	0.00685051	111130	6381	0.0543008	297433	19635	0.0619266
3110062G12Rik		0	0	0	0	0	0	0	0	0
3110067C02Rik		0	0	0	6	0	0	22	0	0
Gstp1	57391	57361	30	0.000522721	185958	65	0.000349417	1378275	470	0.000340889
3110080E11Rik		0	0	0	0	0	0	0	0	0
3110080O07Rik		0	0	0	0	0	0	0	0	0
Rpl7	57341	57341	0	0	734111	64	8.71726e-05	2448156	451	0.000184186
3110082J24Rik		0	0	0	0	0	0	0	0	0
Maged1	57270	57269	1	1.74608e-05	169667	1	5.89383e-06	1621028	434	0.00026766
3110099E03Rik		0	0	0	0	6	0.857143	4	11	0.6875
3200001D21Rik		0	0	0	0	0	0	0	0	0
3222401L13Rik		0	0	0	0	0	0	0	0	0
3300002A11Rik		0	0	0	0	0	0	0	0	0
Sod1	57259	57095	164	0.00286413	503220	1059	0.00210002	1648241	4218	0.00255256
3300002P13Rik		0	0	0	0	0	0	1	0	0
3300005D01Rik		0	0	0	0	0	0	295	1	0.003367
Tubb4b	57201	57201	0	0	801462	347	0.000432771	763518	165	0.000216058
3632454L22Rik		0	2	0.666667	255	6	0.0229008	0	10	0.909091
3732407C23Rik		0	0	0	2	0	0	4	0	0
Tmem38a	56978	56823	155	0.0027203	6345	1550	0.196302	89455	8519	0.0869508
Gnpat	56719	56484	235	0.00414316	65140	6802	0.0945471	163774	16567	0.0918643
Ube2b	56340	55271	1069	0.0189737	199724	29125	0.127267	608198	72543	0.106565
3830417A13Rik		0	0	0	2	1	0.25	2	0	0
3830422I06Rik		0	0	0	0	0	0	0	0	0
3830432H09Rik		0	0	0	0	131	0.992424	0	0	0
3930402G23Rik		0	0	0	3	0	0	2510	443	0.149966
Canx	55954	55862	92	0.00164418	658216	13778	0.0205031	2683290	37758	0.0138763
Acsl1	55832	54541	1291	0.0231225	31980	8020	0.200495	13026	3568	0.215005
4631422I05Rik		0	0	0	0	0	0	0	0	0
Samm50	55736	55651	85	0.00152502	136009	9	6.61672e-05	380530	469	0.00123097
4632404M16Rik		0	0	0	0	0	0	0	0	0
Prdx5	55177	55169	8	0.000144985	44013	54	0.00122538	375012	1522	0.00404212
Akr1a1	55021	54977	44	0.00079968	896599	6889	0.00762489	2465925	16935	0.00682076
4632418H02Rik		0	0	0	0	0	0	0	0	0
mt-Co3	54870	54870	0	0	104803	0	0	60923	0	0
Cct7	54478	54398	80	0.00146846	405501	628	0.0015463	849248	541	0.000636628
4632432E15Rik		0	0	0	0	0	0	0	0	0
4632433K11Rik		0	0	0	1	0	0	0	0	0
4633401B06Rik		0	0	0	0	0	0	0	0	0
4731419I09Rik		0	0	0	0	0	0	0	3	0.75
4732414G09Rik		0	0	0	0	0	0	1904	55	0.0280612
Ndufc1	54467	54438	29	0.000532423	54385	430	0.00784442	144926	281	0.00193516
Acot13	54420	54246	174	0.0031973	23282	1269	0.0516862	76500	5163	0.0632225
Rps14	54309	53972	337	0.00620512	724512	2425	0.00333591	1973244	3444	0.00174231
4732463B04Rik		0	0	0	0	0	0	0	0	0
Hdlbp	54195	53114	1081	0.0199461	111865	29886	0.210833	571537	142480	0.199547
Rbbp7	53983	53979	4	7.4096e-05	226580	5188	0.0223844	1343272	12130	0.00894937
Psmc3	53892	53804	88	0.00163287	325524	2805	0.00854323	761352	3788	0.00495072
4732490B19Rik		0	0	0	1	0	0	0	0	0
Cox8a	53841	53798	43	0.000798633	237450	2827	0.0117655	724493	3875	0.00532011
Calm1	53266	53250	16	0.000300374	2661860	4484	0.0016817	2080403	1748	0.000839516
4831440D22Rik		0	0	0	0	0	0	0	0	0
4833403J16Rik		0	0	0	11	0	0	0	0	0
4833404L02Rik		0	0	0	0	0	0	0	0	0
4833405L11Rik		0	0	0	0	0	0	0	0	0
4833407H14Rik		0	0	0	0	0	0	0	0	0
Timm17a	53172	53068	104	0.00195588	133690	2146	0.0157983	378361	805	0.00212308
Actb	53155	53150	5	9.40628e-05	7931479	1057	0.000133249	15614643	1065	6.82006e-05
Cox7a2l	53138	53134	4	7.52743e-05	197432	539	0.00272261	564933	452	0.000799454
4833412C15Rik		0	0	0	0	0	0	0	0	0
4833412K13Rik		0	0	0	0	0	0	0	0	0
4833413E03Rik		0	0	0	0	0	0	0	0	0
4833413G10Rik		0	0	0	0	0	0	0	0	0
4833415N18Rik		0	0	0	4	0	0	0	0	0
Gyg	53087	53038	49	0.000922996	120484	2238	0.0182362	189634	5378	0.0275776
Mgp	52996	52802	194	0.00366058	174570	470	0.00268509	36457341	25896	0.000709805
4833418N17Rik		0	0	0	0	0	0	0	0	0
Zfp706	52981	52906	75	0.00141558	281749	1057	0.00373753	619091	1109	0.00178813
4833419O12Rik		0	0	0	0	0	0	0	0	0
Pkig	52880	51552	1328	0.025113	79468	12648	0.137304	186810	19347	0.0938455
4833421G17Rik		0	0	0	0	0	0	0	0	0
4833421K07Rik		0	0	0	0	0	0	0	0	0
Kcnk3	52864	51874	990	0.0187269	2592	93	0.034624	5742	76	0.0130607
4833422M21Rik		0	0	0	0	0	0	0	0	0
Atp5md	52805	52772	33	0.000624929	61376	1833	0.0289986	140351	1880	0.0132178
4833427G06Rik		0	0	0	0	0	0	13	0	0
4833428L15Rik		0	0	0	0	87	0.988636	0	2	0.666667
Selenbp1	52577	52531	46	0.000874891	37775	114	0.00300871	1678284	10890	0.00644693
Nexn	52499	46567	5932	0.11299	7023	957	0.11991	41843	14508	0.257453
4833445I07Rik		0	0	0	1406	0	0	1587	0	0
4921501I09Rik		0	1	0.5	0	4	0.8	14	880	0.98324
Cox14	51857	51815	42	0.000809904	102996	177	0.00171555	325547	146	0.000448274
4921504E06Rik		0	2	0.666667	2	79	0.963415	0	15	0.9375
4921507G05Rik		0	0	0	0	0	0	40	20	0.327869
Ccng1	51851	51735	116	0.00223714	29585	3491	0.105542	120612	2602	0.0211176
Cox8b	51746	51741	5	9.6624e-05	6292	1	0.000158881	6626	0	0
4921508M14Rik		0	0	0	0	0	0	0	0	0
4921509A06Rik		0	0	0	0	0	0	0	0	0
4921509C19Rik		0	0	0	0	0	0	0	0	0
4921509O07Rik		0	0	0	0	284	0.996491	7	1229	0.993533
4921511C10Rik		0	0	0	0	0	0	0	0	0
4921511C20Rik		0	0	0	2	0	0	0	0	0
4921511E07Rik		0	0	0	0	0	0	0	0	0
4921511I17Rik		0	0	0	0	4	0.8	0	3	0.75
4921513H07Rik		0	0	0	0	0	0	1	0	0
Mrpl30	51729	51705	24	0.000463947	61786	278	0.00447918	229776	1733	0.00748564
4921513I08Rik		0	0	0	0	0	0	0	0	0
4921514A10Rik		0	0	0	0	0	0	12	0	0
4921515E04Rik		0	178	0.994413	0	235	0.995763	0	643	0.998447
4921515L22Rik		0	0	0	0	0	0	0	0	0
4921516A02Rik		0	0	0	0	52	0.981132	105	2102	0.951993
4921517D16Rik		0	0	0	0	0	0	0	0	0
4921517D22Rik		0	0	0	14	0	0	1	6	0.75
4921518K17Rik		0	0	0	0	0	0	0	0	0
4921520N01Rik		0	0	0	0	0	0	0	0	0
4921521D15Rik		0	0	0	0	0	0	0	0	0
4921522A10Rik		0	0	0	21	0	0	0	0	0
4921522P10Rik		0	0	0	328	0	0	332	34	0.0926431
4921523L03Rik		0	0	0	0	0	0	0	0	0
Phb	51625	51623	2	3.87402e-05	120629	3290	0.0265494	337011	7154	0.0207865
4921524L21Rik		0	0	0	0	2	0.666667	0	3	0.75
4921525O09Rik		0	0	0	2	317	0.990625	0	86	0.988506
Napa	51545	51356	189	0.00366663	272752	4282	0.0154565	1014231	6153	0.00603008
4921528I07Rik		0	0	0	1	72	0.972973	0	7	0.875
4921529L05Rik		0	2	0.666667	1	13	0.866667	0	12	0.923077
Clic4	51488	49493	1995	0.0387461	731744	180724	0.19806	578456	166944	0.223965
4921531P14Rik		0	0	0	0	22	0.956522	0	1	0.5
4921533I20Rik		0	18	0.947368	0	80	0.987654	0	19	0.95
4921534A09Rik		0	0	0	0	0	0	128	0	0
4921534H16Rik		0	0	0	0	0	0	0	0	0
Rab2a	51170	50829	341	0.00666393	520122	52865	0.092262	1453054	112212	0.0716887
Mrfap1	51156	51156	0	0	497838	575	0.00115366	1940220	153	7.88508e-05
4921539H07Rik		0	0	0	2	149	0.980263	0	6	0.857143
4922502N22Rik		0	0	0	0	0	0	1	1	0.333333
4930401A07Rik		0	13	0.928571	0	25	0.961538	0	2	0.666667
4930401C15Rik		0	0	0	0	46	0.978723	0	1309	0.999237
4930401G09Rik		0	0	0	0	0	0	0	0	0
4930401O10Rik		0	0	0	0	0	0	0	213	0.995327
4930401O12Rik		0	0	0	0	21	0.954545	0	16	0.941176
4930402C01Rik		0	0	0	0	0	0	0	0	0
Mtch2	51077	50877	200	0.00391558	186506	1689	0.00897469	490233	3212	0.00650932
4930402F06Rik		0	36	0.972973	0	38	0.974359	1	2	0.5
4930402F11Rik		0	0	0	2	276	0.989247	0	149	0.993333
4930402H05Rik		0	0	0	0	0	0	0	0	0
Rps3a1	50874	50752	122	0.00239803	464855	2218	0.00474871	1929839	4895	0.00253006
4930402K13Rik		0	0	0	2	0	0	0	0	0
4930403D09Rik		0	0	0	0	0	0	0	0	0
4930403O18Rik		0	0	0	0	0	0	0	0	0
Dgat2	50829	50709	120	0.00236081	1368	71	0.0493056	12620	4552	0.265067
4930404A05Rik		0	0	0	0	0	0	0	0	0
4930404A12Rik		0	0	0	0	0	0	0	0	0
Acss1	50668	47406	3262	0.0643786	21640	9448	0.303902	2531	991	0.281294
4930404H24Rik		0	0	0	0	0	0	0	0	0
4930404I05Rik		0	0	0	0	0	0	1	265	0.992509
4930404I20Rik		0	0	0	0	0	0	0	0	0
4930404K13Rik		0	0	0	0	0	0	0	0	0
Slc8a1	50608	15877	34731	0.686261	458	1169	0.718059	41426	392410	0.90451
Mtfr1l	50506	50419	87	0.00172253	113229	3492	0.0299172	477001	9642	0.0198133
4930405A10Rik		0	0	0	0	0	0	0	0	0
Unc45b	50310	50084	226	0.00449206	227780	21263	0.0853785	8642	1025	0.10602
4930405D01Rik		0	57	0.982759	0	225	0.995575	0	23	0.958333
4930405D11Rik		0	4	0.8	0	13	0.928571	0	11	0.916667
4930405G09Rik		0	0	0	0	0	0	0	0	0
4930405H06Rik		0	0	0	0	0	0	0	0	0
4930405J17Rik		0	0	0	0	0	0	0	0	0
4930405L22Rik		0	0	0	0	2	0.666667	0	0	0
4930405N21Rik		0	0	0	0	0	0	0	0	0
4930405O22Rik		0	0	0	0	0	0	0	0	0
4930406D18Rik		0	0	0	0	0	0	0	6	0.857143
4930407G08Rik		0	0	0	0	9	0.9	55	335	0.856777
4930407I10Rik		0	0	0	4	3	0.375	0	0	0
4930407I19Rik		0	0	0	0	0	0	0	0	0
4930408K08Rik		0	0	0	0	0	0	0	0	0
4930408O17Rik		0	0	0	0	0	0	0	0	0
4930412B13Rik		0	0	0	0	10	0.909091	7	90	0.918367
Decr1	50081	49883	198	0.00395352	44624	1247	0.0271843	246004	9653	0.0377575
4930412E21Rik		0	22	0.956522	0	2	0.666667	0	7	0.875
4930412F09Rik		0	0	0	0	4	0.8	1	97	0.979798
4930412F12Rik		0	0	0	0	0	0	0	0	0
4930412L05Rik		0	0	0	0	0	0	1048	875	0.454782
Ndufv3	49968	49956	12	0.000240149	60048	3665	0.0575227	259192	10875	0.0402676
4930412O13Rik		0	0	0	3	0	0	0	0	0
4930413E15Rik		0	0	0	0	6	0.857143	0	0	0
4930413F20Rik		0	0	0	0	0	0	1	0	0
4930413G21Rik		0	0	0	0	0	0	0	0	0
4930414F18Rik		0	132	0.992481	5	381	0.984496	1	37	0.948718
4930414N06Rik		0	602	0.998342	4	26462	0.999811	0	62564	0.999984
4930415C11Rik		0	0	0	0	0	0	0	0	0
4930415H17Rik		0	0	0	0	0	0	0	0	0
4930415L06Rik		0	0	0	0	0	0	0	0	0
4930415O11Rik		0	0	0	0	0	0	0	0	0
Dmd	49938	27635	22303	0.446605	24105	12374	0.3392	94010	53865	0.364258
4930415P13Rik		0	0	0	0	0	0	0	0	0
Mff	49554	49344	210	0.00423772	165813	9835	0.0559923	494464	8651	0.0171948
4930417O13Rik		0	38	0.974359	1	12	0.857143	0	14	0.933333
4930417O22Rik		0	0	0	0	0	0	2	17	0.85
4930419G24Rik		0	0	0	0	0	0	0	0	0
4930420G21Rik		0	0	0	0	24	0.96	0	27	0.964286
4930420N18Rik		0	0	0	0	0	0	0	0	0
4930421C12Rik		0	0	0	0	0	0	2	0	0
4930421P07Rik		0	0	0	0	0	0	0	0	0
4930422C21Rik		0	0	0	3	1	0.2	0	0	0
4930422I22Rik		0	0	0	0	75	0.986842	1	5	0.714286
Echs1	49539	49521	18	0.000363343	61119	1011	0.0162721	212286	6528	0.0298334
4930423C22Rik		0	0	0	0	0	0	0	0	0
4930423D22Rik		0	0	0	0	0	0	0	0	0
4930423D24Rik		0	0	0	0	0	0	0	0	0
4930423M02Rik		0	0	0	0	21	0.954545	0	0	0
4930425K10Rik		0	0	0	0	0	0	0	0	0
4930425K24Rik		0	0	0	0	0	0	0	0	0
Gstm2	49483	49478	5	0.000101043	200808	1479	0.00731136	1677749	5469	0.00324913
4930425O10Rik		0	0	0	0	13	0.928571	0	1	0.5
Ivns1abp	49272	47902	1370	0.0278043	94684	5750	0.057251	208150	7878	0.0364673
4930426D05Rik		0	0	0	0	0	0	0	0	0
P4hb	49153	48853	300	0.00610327	441797	6869	0.0153098	2132803	18426	0.00856533
4930426L09Rik		0	0	0	0	0	0	1103	0	0
4930428D20Rik		0	0	0	0	2	0.666667	0	0	0
4930428E07Rik		0	0	0	0	0	0	0	0	0
4930428N03Rik		0	40	0.97561	0	1535	0.999349	6	97	0.932692
4930428O21Rik		0	0	0	0	0	0	0	1	0.5
4930429C20Rik		0	0	0	0	0	0	0	0	0
4930429D17Rik		0	19	0.95	0	87	0.988636	0	7	0.875
Pnpla2	49106	49091	15	0.000305455	354069	743	0.00209406	170286	230	0.00134884
4930429H19Rik		0	1	0.5	0	0	0	57	150	0.721154
4930429P21Rik		0	0	0	0	0	0	0	0	0
4930430E12Rik		0	0	0	92	821	0.898249	0	10	0.909091
Angpt1	48834	28263	20571	0.421235	1379	1140	0.452381	74205	145728	0.662599
Tmbim6	48824	48814	10	0.000204813	1459230	1518	0.00103919	2035886	2565	0.00125831
4930430O22Rik		0	0	0	0	0	0	0	0	0
4930431F10Rik		0	0	0	0	0	0	0	0	0
4930431F12Rik		0	0	0	0	80	0.987654	0	0	0
Ivd	48495	48282	213	0.00439211	23860	4939	0.171493	208068	15791	0.0705396
4930431P03Rik		0	0	0	0	0	0	0	0	0
Cops6	48335	48331	4	8.27541e-05	181963	17	9.34163e-05	434721	29	6.67048e-05
4930431P22Rik		0	2	0.666667	0	0	0	0	0	0
4930432B10Rik		0	999	0.999	2	1907	0.998429	10	3931	0.99721
Atp1a1	48327	47349	978	0.0202367	232482	3452	0.0146311	263714	2238	0.00841502
4930432H08Rik		0	0	0	0	0	0	0	1	0.5
4930432J09Rik		0	0	0	0	45	0.978261	1	25	0.925926
4930432K21Rik		0	96	0.989691	2547	1858	0.421698	3096	1977	0.389633
4930432L08Rik		0	0	0	0	0	0	0	0	0
4930432M17Rik		0	0	0	0	0	0	0	4	0.8
4930432O09Rik		0	0	0	0	0	0	0	0	0
4930433B08Rik		0	0	0	0	3	0.75	0	0	0
4930433E05Rik		0	0	0	0	0	0	0	0	0
4930433I11Rik		0	0	0	0	0	0	1	3	0.6
4930433J02Rik		0	0	0	0	0	0	0	0	0
4930433N12Rik		0	16	0.941176	0	18	0.947368	182	73	0.285156
4930434B07Rik		0	0	0	2	0	0	28	7	0.194444
4930434F21Rik		0	7	0.875	0	45	0.978261	0	2	0.666667
4930434J06Rik		0	9	0.9	0	15	0.9375	0	14	0.933333
4930434O05Rik		0	0	0	0	0	0	3	0	0
4930435C17Rik		0	0	0	0	41	0.97619	0	146	0.993197
4930435F18Rik		0	2	0.666667	0	4	0.8	0	6	0.857143
4930435M08Rik		0	0	0	0	0	0	0	0	0
4930435N07Rik		0	0	0	0	0	0	0	0	0
4930437M23Rik		0	0	0	1	3	0.6	0	0	0
4930438A08Rik		0	0	0	0	16	0.941176	9	539	0.981785
4930438E09Rik		0	0	0	0	0	0	0	0	0
4930439A04Rik		0	0	0	0	0	0	0	0	0
Mfn1	48285	46784	1501	0.0310856	40584	10370	0.203513	58364	11802	0.168199
4930440C22Rik		0	0	0	3	0	0	0	0	0
Tmem59	48213	47893	320	0.00663708	1038443	16853	0.0159699	2698874	25223	0.00925921
4930441H08Rik		0	0	0	0	6	0.857143	0	21	0.954545
4930441J16Rik		0	2	0.666667	0	12	0.923077	0	10	0.909091
4930442G10Rik		0	0	0	3	0	0	2	1	0.25
4930442G15Rik		0	0	0	0	0	0	0	0	0
4930442H23Rik		0	0	0	0	0	0	0	0	0
4930442J19Rik		0	0	0	0	0	0	0	2	0.666667
4930442L01Rik		0	0	0	0	0	0	0	0	0
4930442P19Rik		0	0	0	0	0	0	0	0	0
4930443G03Rik		0	0	0	0	0	0	0	0	0
4930443O20Rik		0	1	0.5	715	55	0.0713359	439	33	0.0697674
4930444A19Rik		0	0	0	0	0	0	0	0	0
4930444E06Rik		0	0	0	0	0	0	0	0	0
4930444F02Rik		0	0	0	0	0	0	0	0	0
4930444G20Rik		0	0	0	0	0	0	0	0	0
4930444K16Rik		0	0	0	0	0	0	0	0	0
4930444P10Rik		0	9	0.9	1	18	0.9	2	148	0.980132
4930445B16Rik		0	0	0	0	0	0	0	0	0
4930445E18Rik		0	287	0.996528	0	62	0.984127	0	571	0.998252
4930445N06Rik		0	63	0.984375	0	75	0.986842	0	0	0
4930445N08Rik		0	0	0	0	2	0.666667	0	0	0
Bag1	47557	47450	107	0.00224988	171543	1247	0.00721681	580715	2167	0.00371773
4930447A16Rik		0	0	0	0	0	0	0	0	0
4930447C04Rik		0	48	0.979592	0	11	0.916667	0	2973	0.999664
4930447C11Rik		0	0	0	0	0	0	0	0	0
4930447F04Rik		0	0	0	0	0	0	0	0	0
4930447F24Rik		0	0	0	0	0	0	118	0	0
4930447J18Rik		0	27	0.964286	0	10	0.909091	0	102	0.990291
4930447K03Rik		0	0	0	131	65	0.329949	218	659	0.750569
4930447M23Rik		0	0	0	0	0	0	1992	171	0.0790203
4930447N08Rik		0	0	0	0	0	0	86	0	0
4930448A20Rik		0	0	0	2	0	0	0	0	0
4930448C13Rik		0	0	0	0	190	0.994764	0	5	0.833333
4930448D08Rik		0	0	0	0	0	0	309	248	0.444444
4930448E22Rik		0	0	0	0	0	0	0	0	0
4930448F12Rik		0	0	0	0	1	0.5	0	1	0.5
4930448H16Rik		0	0	0	40	6	0.12766	0	1	0.5
4930448I06Rik		0	0	0	0	24	0.96	0	4	0.8
4930448I18Rik		0	0	0	0	0	0	0	0	0
4930448K20Rik		0	0	0	0	0	0	0	0	0
4930449A18Rik		0	2	0.666667	0	99	0.99	0	2	0.666667
4930449C09Rik		0	0	0	0	1	0.5	0	7	0.875
4930449E01Rik		0	0	0	0	25	0.961538	0	30	0.967742
4930449E18Rik		0	0	0	0	0	0	0	0	0
4930449I04Rik		0	0	0	0	0	0	0	0	0
4930449I24Rik		0	0	0	0	0	0	0	0	0
Reep5	47478	47346	132	0.00278018	119445	1708	0.0140978	478985	7431	0.015277
Rps9	47456	47454	2	4.21434e-05	441069	220	0.000498538	1905240	256	0.000134348
Psmb2	47173	46316	857	0.0181668	275106	9715	0.034109	790060	27549	0.0336945
4930452A19Rik		0	0	0	1	3417	0.999415	67	535	0.887231
Dlat	47152	46616	536	0.0113673	33922	8155	0.193807	91252	11258	0.109822
4930452G13Rik		0	0	0	2	6	0.666667	2	0	0
4930452L12Rik		0	0	0	0	0	0	0	0	0
4930452N14Rik		0	11	0.916667	0	0	0	0	0	0
4930453C13Rik		0	0	0	0	0	0	0	0	0
4930453H23Rik		0	0	0	0	0	0	2	93	0.96875
4930453L07Rik		0	0	0	0	0	0	1	1	0.333333
Grb14	47117	45503	1614	0.0342544	7072	53	0.00743755	76221	10216	0.118189
4930453O03Rik		0	0	0	0	0	0	0	0	0
4930455B14Rik		0	0	0	0	5	0.833333	1	0	0
4930455C13Rik		0	0	0	0	0	0	0	0	0
Hnrnpk	47105	46604	501	0.0106356	958179	10780	0.0111253	2224076	12893	0.0057636
H2-D1	47050	47020	30	0.000637606	10364974	13867	0.00133608	9717420	11670	0.0011995
4930455J16Rik		0	0	0	0	70	0.985915	1	8	0.8
4930455M05Rik		0	0	0	37	0	0	0	0	0
4930456G14Rik		0	0	0	0	0	0	0	0	0
4930456L15Rik		0	0	0	1	4	0.666667	0	410	0.997567
4930458A03Rik		0	0	0	2	2	0.4	0	3	0.75
4930458B22Rik		0	0	0	0	0	0	0	3	0.75
Micos10	46982	46282	700	0.014899	111203	4438	0.0383771	272244	7897	0.0281893
4930458K08Rik		0	0	0	0	3	0.75	0	5	0.833333
4930459C07Rik		0	6	0.857143	0	1	0.5	0	2	0.666667
4930459L07Rik		0	0	0	0	21	0.954545	0	0	0
4930461C15Rik		0	0	0	0	0	0	0	0	0
4930461G14Rik		0	0	0	0	3	0.75	0	55	0.982143
4930463O16Rik		0	0	0	15	112	0.875	271	360	0.56962
4930465I24Rik		0	0	0	0	0	0	0	0	0
4930465K09Rik		0	0	0	0	0	0	0	0	0
4930465K10Rik		0	0	0	0	0	0	0	0	0
4930465M20Rik		0	0	0	0	0	0	1	5	0.714286
4930466I24Rik		0	0	0	0	0	0	0	0	0
4930466K18Rik		0	0	0	0	0	0	0	0	0
4930467D21Rik		0	24	0.96	0	106	0.990654	0	57	0.982759
4930467E23Rik		0	4	0.8	0	14	0.933333	0	2	0.666667
4930467J12Rik		0	2	0.666667	0	0	0	0	0	0
4930467K11Rik		0	0	0	0	1	0.5	0	6	0.857143
4930469B13Rik		0	0	0	0	0	0	0	0	0
4930469K13Rik		0	10	0.909091	0	41	0.97619	0	3408	0.999707
4930470B04Rik		0	0	0	0	0	0	0	0	0
4930470G03Rik		0	0	0	16	6	0.26087	108	117	0.517699
4930470H14Rik		0	0	0	2	14	0.823529	0	4	0.8
4930470O06Rik		0	0	0	0	0	0	0	0	0
4930470P17Rik		0	0	0	12	2	0.133333	0	4	0.8
Snx3	46516	46493	23	0.000494443	667646	29242	0.0419608	964736	28010	0.0282146
4930471D02Rik		0	0	0	0	0	0	0	0	0
4930471E15Rik		0	0	0	0	0	0	0	0	0
Surf4	46225	46068	157	0.00339636	275473	190	0.000689245	1334672	2003	0.00149849
4930471G03Rik		0	0	0	0	0	0	0	0	0
4930471G24Rik		0	0	0	0	0	0	0	0	0
4930471L23Rik		0	0	0	0	2	0.666667	0	272	0.996337
4930471M09Rik		0	9	0.9	0	3	0.75	190	14	0.0682927
4930473A02Rik		0	81	0.987805	450	6290	0.933096	503	6643	0.929481
4930473D10Rik		0	0	0	0	0	0	0	0	0
4930473H19Rik		0	0	0	0	0	0	1	0	0
4930473O22Rik		0	0	0	0	0	0	0	10	0.909091
4930474B08Rik		0	0	0	0	0	0	0	0	0
4930474H06Rik		0	0	0	0	0	0	0	904	0.998895
4930474H20Rik		0	4	0.8	0	31	0.96875	0	8	0.888889
4930474M22Rik		0	0	0	0	0	0	0	0	0
4930474N05Rik		0	0	0	1	0	0	0	1	0.5
4930474N09Rik		0	0	0	0	0	0	6	0	0
4930477E14Rik		0	0	0	0	0	0	0	0	0
4930477G07Rik		0	0	0	0	7	0.875	0	12	0.923077
4930477N07Rik		0	2	0.666667	2	4	0.571429	0	6	0.857143
4930477O15Rik		0	0	0	0	0	0	0	0	0
4930478E11Rik		0	0	0	0	6	0.857143	0	0	0
4930478K11Rik		0	0	0	0	0	0	0	0	0
4930478L05Rik		0	0	0	0	0	0	0	0	0
4930478M09Rik		0	0	0	0	0	0	166	0	0
4930478M13Rik		0	0	0	0	0	0	0	0	0
4930478P22Rik		0	6	0.857143	0	11	0.916667	0	177	0.994382
Chrm2	46182	35179	11003	0.238248	197	239	0.546911	1648	176	0.0964384
4930479H17Rik		0	0	0	0	3	0.75	0	0	0
4930480C01Rik		0	0	0	0	0	0	0	0	0
Rps5	46023	46023	0	0	639707	5	7.816e-06	2417204	1673	0.000691643
4930480G23Rik		0	136	0.992701	0	20	0.952381	0	5	0.833333
4930480K02Rik		0	0	0	0	0	0	0	0	0
4930480K15Rik		0	0	0	0	0	0	0	0	0
4930480M12Rik		0	4	0.8	0	132	0.992481	0	397	0.997487
Isca1	45999	45999	0	0	95083	0	0	397334	0	0
Dad1	45962	45942	20	0.000435133	223824	6566	0.0284994	1009247	13002	0.012719
4930483J18Rik		0	0	0	0	0	0	29	69	0.69697
4930483K19Rik		0	0	0	0	0	0	0	0	0
4930483O08Rik		0	5	0.833333	0	0	0	3	27	0.870968
4930483P17Rik		0	1	0.5	1	1	0.333333	3	20	0.833333
4930484H19Rik		0	0	0	2	0	0	6	0	0
4930484I04Rik		0	0	0	0	0	0	0	0	0
4930486F22Rik		0	0	0	0	0	0	0	0	0
4930486I03Rik		0	0	0	0	0	0	0	0	0
4930486L24Rik		0	0	0	0	0	0	0	0	0
4930486N12Rik		0	0	0	0	0	0	0	0	0
Asb11	45781	44207	1574	0.0343803	556	4	0.00713012	893	8	0.00886918
4930488B22Rik		0	0	0	1	3	0.6	0	0	0
4930488L21Rik		0	0	0	0	264	0.996226	51	702	0.931034
4930488N15Rik		0	26	0.962963	0	1	0.5	0	48	0.979592
4930488N24Rik		0	0	0	0	0	0	0	0	0
4930500A05Rik		0	0	0	0	0	0	5	0	0
4930500F04Rik		0	17	0.944444	1	48	0.96	0	4	0.8
Anxa6	45578	45411	167	0.00366397	322947	8410	0.0253804	2041400	63088	0.0299778
4930500H12Rik		0	154	0.993548	0	287	0.996528	0	61	0.983871
4930500L23Rik		0	0	0	0	6	0.857143	0	5	0.833333
4930500M09Rik		0	0	0	122	0	0	160	0	0
4930502A04Rik		0	0	0	0	208	0.995215	0	171	0.994186
4930502C17Rik		0	0	0	0	0	0	0	0	0
4930502E09Rik		0	0	0	180	8	0.042328	98	0	0
4930503B20Rik		0	0	0	0	0	0	0	0	0
4930503E14Rik		0	1	0.5	0	10	0.909091	0	1	0.5
Atp1b1	45117	44945	172	0.00381223	3117	4	0.00128123	163596	515	0.0031381
4930503F20Rik		0	22	0.956522	0	0	0	7	17	0.68
4930503H13Rik		0	0	0	0	0	0	0	0	0
Eef1g	44990	44921	69	0.00153364	282640	6607	0.022842	964100	12600	0.0129006
4930503O07Rik		0	28	0.965517	0	2	0.666667	0	4	0.8
4930504C09Rik		0	0	0	0	0	0	0	2	0.666667
4930504D19Rik		0	0	0	0	0	0	0	0	0
4930505A04Rik		0	0	0	0	6	0.857143	1080	666	0.381225
4930505G20Rik		0	0	0	0	0	0	0	0	0
4930505K13Rik		0	0	0	0	0	0	0	0	0
4930505K14Rik		0	0	0	0	1	0.5	0	2	0.666667
4930505M18Rik		0	0	0	0	0	0	0	0	0
Capza2	44979	44808	171	0.00380169	427379	20532	0.0458394	700061	23760	0.0328257
4930505O20Rik		0	0	0	0	0	0	0	0	0
Rpl3	44894	44892	2	4.45484e-05	631537	1164	0.00183973	2147918	1948	0.000906103
4930507D05Rik		0	0	0	607	0	0	1	0	0
Itgb1	44886	43890	996	0.0221891	833437	111580	0.118072	1273524	147646	0.10389
4930509E16Rik		0	0	0	1314	75	0.0539568	12	14	0.518519
4930509G22Rik		0	0	0	164	45	0.214286	350	738	0.677686
4930509H03Rik		0	0	0	0	0	0	0	0	0
4930509J09Rik		0	0	0	0	0	0	0	0	0
4930509K18Rik		0	0	0	0	0	0	0	0	0
Hhatl	44416	44192	224	0.00504311	6	0	0	1081	0	0
4930511A02Rik		0	0	0	8	0	0	0	0	0
4930511E03Rik		0	0	0	0	0	0	0	1	0.5
4930511J24Rik		0	0	0	39	0	0	0	0	0
4930511M06Rik		0	72	0.986301	0	46	0.978723	0	1350	0.99926
4930511M18Rik		0	0	0	0	112	0.99115	0	126	0.992126
4930511O05Rik		0	0	0	0	0	0	0	1	0.5
4930512B01Rik		0	0	0	0	814	0.998773	0	506	0.998028
Cavin1	44391	43777	614	0.0138313	5041991	10452	0.0020687	4602896	6013	0.00130465
4930512J16Rik		0	0	0	0	0	0	0	0	0
4930512M02Rik		0	0	0	1	17	0.894737	0	2	0.666667
4930512P04Rik		0	0	0	0	0	0	0	0	0
4930513D17Rik		0	335	0.997024	2	45	0.9375	0	39	0.975
4930513L16Rik		0	0	0	0	0	0	1	1	0.333333
Fkbp1a	44271	44104	167	0.00377214	1453716	9101	0.00622155	1958995	8729	0.00443609
4930513N20Rik		0	0	0	0	0	0	0	0	0
4930513O06Rik		0	0	0	0	4	0.8	2	0	0
4930515B02Rik		0	0	0	0	0	0	0	0	0
4930515G01Rik		0	0	0	0	0	0	0	0	0
4930515G13Rik		0	0	0	0	0	0	0	0	0
4930515G16Rik		0	0	0	0	0	0	0	0	0
4930515L19Rik		0	1	0.5	0	9	0.9	0	52	0.981132
Gmpr	44108	43086	1022	0.0231699	69032	2496	0.0348949	8565	41	0.00476356
4930516K23Rik		0	0	0	0	0	0	0	0	0
4930517E11Rik		0	0	0	0	0	0	0	0	0
Aplp2	43784	43241	543	0.0124015	2039071	20315	0.00986459	1981532	11906	0.00597259
4930517G19Rik		0	0	0	0	0	0	0	0	0
4930517J16Rik		0	0	0	0	0	0	0	0	0
4930517L18Rik		0	0	0	0	0	0	0	0	0
4930517M08Rik		0	0	0	0	0	0	0	1	0.5
4930517O19Rik		0	0	0	0	0	0	0	0	0
4930518C09Rik		0	0	0	0	0	0	0	0	0
4930518I15Rik		0	0	0	0	0	0	0	0	0
4930518I17Rik		0	0	0	0	0	0	0	0	0
4930518J20Rik		0	0	0	2	0	0	0	0	0
4930518J21Rik		0	0	0	0	9	0.9	0	0	0
4930518P08Rik		0	0	0	1	3	0.6	0	16	0.941176
4930519A11Rik		0	0	0	0	115	0.991379	0	1	0.5
4930519D14Rik		0	0	0	1	1	0.333333	0	0	0
4930519E07Rik		0	0	0	36	0	0	0	0	0
4930519F09Rik		0	0	0	4	7	0.583333	1	1	0.333333
4930519F16Rik		0	133	0.992537	0	51	0.980769	0	35	0.972222
4930519F24Rik		0	0	0	0	42	0.976744	0	0	0
4930519G04Rik		0	0	0	0	3	0.75	0	15	0.9375
4930519H02Rik		0	6	0.857143	0	0	0	0	2	0.666667
4930519K11Rik		0	0	0	0	0	0	0	0	0
4930519L02Rik		0	0	0	0	37	0.973684	0	7	0.875
4930519P11Rik		0	0	0	702	0	0	21	0	0
4930520K02Rik		0	4	0.8	0	0	0	0	611	0.998366
4930520M14Rik		0	0	0	0	0	0	1	0	0
Psma1	43774	43698	76	0.00173615	301612	4127	0.0134984	830243	1973	0.00237078
4930520P13Rik		0	0	0	0	72	0.986301	0	0	0
4930521E06Rik		0	0	0	0	0	0	0	0	0
4930521O17Rik		0	0	0	0	0	0	0	0	0
4930522H14Rik		0	0	0	0	35	0.972222	0	1	0.5
Rnf187	43663	43581	82	0.00187798	415714	3614	0.00861853	1054876	7896	0.00742962
4930522N08Rik		0	0	0	0	0	0	0	0	0
Spop	43520	42723	797	0.018313	240912	45925	0.160108	489445	81918	0.143373
Park7	43466	42956	510	0.011733	178266	1067	0.00594979	716117	4283	0.0059453
4930523O13Rik		0	0	0	0	5	0.833333	0	32	0.969697
4930524B15Rik		0	58	0.983051	0	0	0	0	0	0
Tspan3	43271	43254	17	0.000392864	43542	46	0.00105531	1099113	7241	0.00654492
4930524C18Rik		0	90	0.989011	1	8	0.8	0	12	0.923077
4930524O05Rik		0	0	0	0	0	0	0	0	0
Ndufs5	43181	43093	88	0.00203789	91089	1509	0.0162961	206597	1059	0.00509976
4930524O08Rik		0	1	0.5	0	2	0.666667	0	3	0.75
4930525C09Rik		0	0	0	0	0	0	0	0	0
4930525G20Rik		0	40	0.97561	0	752	0.998672	36	2046	0.982237
4930526A20Rik		0	0	0	0	0	0	0	0	0
4930526F13Rik		0	0	0	4	0	0	0	0	0
4930526H09Rik		0	4	0.8	0	15	0.9375	0	4	0.8
4930526L06Rik		0	0	0	0	3	0.75	0	7	0.875
4930526M16Rik		0	0	0	0	0	0	0	0	0
4930527A07Rik		0	0	0	0	0	0	0	0	0
4930527B05Rik		0	0	0	0	0	0	0	0	0
4930527E20Rik		0	0	0	1	0	0	4	189	0.974227
Tcp1	43160	42934	226	0.00523621	152997	2855	0.0183185	507828	6014	0.011704
4930527G23Rik		0	0	0	0	0	0	0	0	0
4930527J03Rik		0	0	0	0	0	0	0	0	0
4930528D03Rik		0	0	0	0	0	0	0	0	0
4930528G23Rik		0	0	0	0	18	0.947368	2	2	0.4
4930528H21Rik		0	2	0.666667	0	2	0.666667	0	0	0
4930528J11Rik		0	0	0	0	0	0	0	0	0
4930528P14Rik		0	0	0	0	3	0.75	0	2	0.666667
4930529C04Rik		0	0	0	5	0	0	5	0	0
Serinc1	42968	42848	120	0.00279271	492068	4075	0.00821334	1015283	3868	0.00379531
4930529K09Rik		0	0	0	0	0	0	0	5	0.833333
4930529N20Rik		0	0	0	0	0	0	0	1	0.5
4930532G15Rik		0	0	0	2	0	0	1010	0	0
4930532I03Rik		0	0	0	0	0	0	1	0	0
4930532M18Rik		0	0	0	0	12	0.923077	0	0	0
4930533B01Rik		0	0	0	0	0	0	0	0	0
4930533D04Rik		0	0	0	4	0	0	0	0	0
4930533I22Rik		0	0	0	0	1	0.5	0	0	0
4930533K18Rik		0	180	0.994475	1	996	0.997996	42	11780	0.996363
4930533L02Rik		0	0	0	0	0	0	0	0	0
4930533N22Rik		0	0	0	0	9	0.9	0	39	0.975
4930533P14Rik		0	18	0.947368	0	36	0.972973	0	6	0.857143
4930534D22Rik		0	0	0	0	0	0	0	0	0
4930534H03Rik		0	0	0	0	4	0.8	0	7	0.875
4930534H18Rik		0	0	0	70	0	0	91	0	0
4930535E02Rik		0	0	0	0	0	0	0	0	0
4930535F04Rik		0	0	0	0	0	0	0	0	0
4930535G08Rik		0	0	0	0	0	0	0	0	0
4930535L15Rik		0	0	0	0	0	0	0	0	0
4930535O05Rik		0	0	0	0	0	0	0	4	0.8
4930537H20Rik		0	0	0	8	0	0	411	0	0
4930538E20Rik		0	0	0	0	0	0	0	0	0
4930538L07Rik		0	0	0	15	10	0.384615	0	1	0.5
4930539C22Rik		0	0	0	0	72	0.986301	0	1	0.5
Ppp2r1a	42888	42821	67	0.00156217	402575	19159	0.045429	1068333	17667	0.0162679
4930539M17Rik		0	0	0	0	4	0.8	0	0	0
4930540E01Rik		0	0	0	0	0	0	0	0	0
4930540I17Rik		0	0	0	0	0	0	0	0	0
4930540M03Rik		0	0	0	0	158	0.993711	0	3	0.75
4930540M05Rik		0	0	0	2	0	0	79	0	0
4930541O19Rik		0	0	0	0	0	0	0	0	0
4930542C12Rik		0	0	0	0	0	0	1	0	0
4930542C16Rik		0	2	0.666667	0	8	0.888889	0	3	0.75
4930542D17Rik		0	12	0.923077	0	55	0.982143	0	217	0.995413
4930542M03Rik		0	0	0	0	2	0.666667	0	0	0
4930543E12Rik		0	4	0.8	0	13	0.928571	0	13	0.928571
4930543I03Rik		0	0	0	0	0	0	0	4	0.8
4930543I11Rik		0	0	0	0	0	0	0	0	0
4930543K20Rik		0	0	0	0	0	0	0	0	0
4930543N07Rik		0	0	0	23	129	0.843137	2	0	0
4930544D05Rik		0	0	0	0	0	0	0	0	0
4930544F09Rik		0	0	0	0	0	0	0	0	0
4930544G11Rik		0	0	0	0	0	0	0	0	0
4930544I03Rik		0	37	0.973684	0	71	0.986111	0	186	0.994652
4930544L04Rik		0	0	0	0	0	0	0	0	0
4930544M13Rik		0	27	0.964286	0	252	0.996047	0	23	0.958333
4930545E07Rik		0	2	0.666667	22	19	0.452381	0	11	0.916667
4930545H06Rik		0	0	0	0	0	0	0	0	0
4930545L08Rik		0	0	0	0	0	0	0	0	0
4930545L23Rik		0	0	0	323	0	0	0	0	0
4930546C10Rik		0	0	0	0	347	0.997126	0	240	0.995851
4930546K05Rik		0	0	0	0	24	0.96	40	602	0.936236
4930547E08Rik		0	0	0	0	0	0	0	18	0.947368
4930547E14Rik		0	48	0.979592	0	3	0.75	0	0	0
4930547H16Rik		0	0	0	0	0	0	0	0	0
Smyd1	42878	42212	666	0.0155321	913	4298	0.824635	1847	1655	0.472452
4930548G14Rik		0	0	0	0	6	0.857143	0	0	0
4930548H24Rik		0	0	0	0	0	0	206	0	0
4930548J01Rik		0	0	0	0	1	0.5	1	4	0.666667
4930548K13Rik		0	0	0	0	18	0.947368	0	19	0.95
4930549C15Rik		0	0	0	0	0	0	0	0	0
Pgk1	42835	42814	21	0.000490242	109475	601	0.00545981	240670	53	0.000220169
4930549P19Rik		0	46	0.978723	0	13	0.928571	0	25	0.961538
Anapc5	42767	42621	146	0.00341377	332737	8743	0.0256032	872635	33049	0.0364906
4930550C17Rik		0	0	0	0	30	0.967742	0	2	0.666667
4930550L24Rik		0	0	0	0	0	0	4	10	0.666667
4930551I15Rik		0	0	0	0	0	0	0	0	0
4930551I23Rik		0	0	0	0	1	0.5	0	1	0.5
4930551L18Rik		0	0	0	0	0	0	0	0	0
4930551O13Rik		0	0	0	0	2	0.666667	36	1	0.0263158
4930553E22Rik		0	0	0	0	2	0.666667	0	4	0.8
4930553I04Rik		0	0	0	0	0	0	0	0	0
4930553I21Rik		0	0	0	0	0	0	0	0	0
4930553J12Rik		0	0	0	0	1	0.5	0	1	0.5
4930553M12Rik		0	0	0	402	0	0	0	0	0
4930553P18Rik		0	0	0	0	0	0	164	0	0
4930554C24Rik		0	1	0.5	0	10	0.909091	0	10	0.909091
4930554G22Rik		0	0	0	4	0	0	0	0	0
4930554G24Rik		0	7	0.875	7	512	0.984615	1	353	0.994366
4930554H23Rik		0	19	0.95	0	10	0.909091	0	6	0.857143
4930554I06Rik		0	0	0	0	0	0	0	0	0
Pdk4	42707	38789	3918	0.0917393	10628	618	0.054948	76836	1622	0.0206732
Ppp2r3a	42678	39771	2907	0.0681131	19951	18713	0.483978	123448	126137	0.505385
4930555B12Rik		0	0	0	0	0	0	0	0	0
4930555F03Rik		0	77	0.987179	0	220	0.995475	0	444	0.997753
4930555G01Rik		0	6	0.857143	785	102	0.114865	0	0	0
4930555G07Rik		0	0	0	0	10	0.909091	1	163	0.987879
4930555G21Rik		0	0	0	0	0	0	1	0	0
4930555K19Rik		0	0	0	0	0	0	4	0	0
4930555M17Rik		0	0	0	1	0	0	0	0	0
4930555O08Rik		0	0	0	1	0	0	55	15	0.211268
4930556C24Rik		0	0	0	0	2	0.666667	0	0	0
4930556G01Rik		0	8	0.888889	0	137	0.992754	0	31	0.96875
4930556G22Rik		0	6	0.857143	0	9	0.9	0	9	0.9
4930556H04Rik		0	0	0	0	0	0	0	0	0
4930556I23Rik		0	0	0	0	0	0	0	0	0
Itgb1bp2	42675	42217	458	0.010732	5382	106	0.0193113	3647	0	0
4930556J24Rik		0	22	0.956522	0	63	0.984375	0	838	0.998808
4930556L07Rik		0	0	0	0	0	0	0	0	0
4930556M19Rik		0	4	0.8	1254	4898	0.796034	107	1649	0.938532
4930556N09Rik		0	0	0	0	2	0.666667	0	84	0.988235
4930556N13Rik		0	0	0	0	54	0.981818	0	1	0.5
4930557B06Rik		0	0	0	0	0	0	0	0	0
4930557F08Rik		0	1	0.5	0	36	0.972973	0	2	0.666667
4930557F10Rik		0	0	0	0	6	0.857143	0	2	0.666667
4930557J02Rik		0	0	0	0	0	0	0	0	0
Spag7	42660	42659	1	2.34406e-05	187132	3122	0.0164096	477402	6703	0.0138461
4930558C23Rik		0	3	0.75	0	5	0.833333	0	3	0.75
4930558F17Rik		0	0	0	0	0	0	0	0	0
4930558G05Rik		0	0	0	0	0	0	0	0	0
4930558J18Rik		0	0	0	0	9	0.9	0	7	0.875
4930558J22Rik		0	0	0	0	0	0	0	0	0
4930558K02Rik		0	6	0.857143	0	7	0.875	0	16	0.941176
4930558N11Rik		0	0	0	0	0	0	0	0	0
4930559C10Rik		0	0	0	2	12	0.8	0	18	0.947368
4930560O18Rik		0	0	0	0	0	0	0	0	0
4930562A09Rik		0	0	0	0	0	0	0	0	0
Ephx2	42655	42531	124	0.00290698	4232	47	0.0109813	42364	1135	0.026092
4930562D21Rik		0	0	0	0	0	0	0	0	0
4930562F07Rik		0	0	0	0	0	0	48	0	0
4930562F17Rik		0	0	0	0	12	0.923077	0	502	0.998012
4930563E18Rik		0	0	0	6	113	0.941667	642	1	0.0015528
Dnaja2	42654	42314	340	0.00797093	169644	12570	0.0689844	416797	23362	0.0530762
4930563F08Rik		0	0	0	0	0	0	0	0	0
4930563H07Rik		0	0	0	1	5	0.714286	0	0	0
4930563I02Rik		0	0	0	0	0	0	0	0	0
4930563J15Rik		0	0	0	0	0	0	0	0	0
4930563M21Rik		0	8	0.888889	68	1829	0.963646	2	706	0.995769
4930563N14Rik		0	0	0	0	0	0	0	0	0
4930564C03Rik		0	0	0	0	0	0	0	0	0
4930564D02Rik		0	0	0	0	0	0	0	2	0.666667
4930565D16Rik		0	0	0	0	43	0.977273	0	28	0.965517
4930565N06Rik		0	0	0	0	0	0	0	0	0
4930566F21Rik		0	0	0	2	0	0	5	1	0.142857
4930566N20Rik		0	0	0	0	0	0	0	0	0
Palld	42614	34747	7867	0.184606	16169	8635	0.348115	47086	8459	0.152288
4930567H17Rik		0	0	0	0	0	0	3	0	0
4930567J20Rik		0	0	0	0	6	0.857143	0	5	0.833333
4930567K12Rik		0	0	0	0	0	0	0	0	0
4930567K20Rik		0	0	0	0	0	0	0	0	0
4930568A12Rik		0	0	0	79	38	0.322034	1152	195	0.144659
4930568A13Rik		0	6	0.857143	0	370	0.997305	0	21	0.954545
4833439L19Rik	42550	42462	88	0.00206811	272868	10657	0.0375874	471210	22079	0.0447587
4930568E12Rik		0	0	0	4	43	0.895833	1	136	0.985507
4930568G15Rik		0	4	0.8	0	1	0.5	0	101	0.990196
4930569F06Rik		0	0	0	0	0	0	0	0	0
4930570B17Rik		0	0	0	0	0	0	0	0	0
4930570D08Rik		0	0	0	0	0	0	0	0	0
4930570E03Rik		0	0	0	0	4	0.8	4	4	0.444444
4930570G19Rik		0	3	0.75	11	20	0.625	5046	2315	0.314453
4930570N18Rik		0	19	0.95	0	0	0	0	0	0
4930571K23Rik		0	0	0	1	0	0	0	0	0
4930571N24Rik		0	0	0	0	0	0	0	0	0
4930572G02Rik		0	0	0	0	0	0	4	0	0
4930572K03Rik		0	0	0	0	9	0.9	0	0	0
4930572O03Rik		0	0	0	0	0	0	0	0	0
4930572O13Rik		0	0	0	0	0	0	0	0	0
4930573C08Rik		0	0	0	0	0	0	0	0	0
4930573C15Rik		0	0	0	0	0	0	0	0	0
4930573H18Rik		0	0	0	0	0	0	0	0	0
4930573I07Rik		0	0	0	0	0	0	0	0	0
4930577H14Rik		0	0	0	0	0	0	0	0	0
4930577N17Rik		0	0	0	0	0	0	0	0	0
4930578E11Rik		0	2	0.666667	0	17	0.944444	0	40	0.97561
4930578G10Rik		0	0	0	0	3	0.75	1123	612	0.352535
4930578I06Rik		0	0	0	0	4	0.8	1	69	0.971831
4930578I07Rik		0	0	0	0	0	0	54	0	0
Fsd2	42491	41441	1050	0.0247105	1876	3	0.00159574	1097	202	0.155385
4930578M07Rik		0	0	0	0	0	0	37	0	0
4930578N18Rik		0	0	0	0	4	0.8	0	4	0.8
4930579C12Rik		0	81	0.987805	98	30	0.232558	0	15	0.9375
4930579D07Rik		0	36	0.972973	0	189	0.994737	410	811	0.663666
4930579D09Rik		0	0	0	0	0	0	0	0	0
4930579F01Rik		0	0	0	0	10	0.909091	0	478	0.997912
4930579G18Rik		0	0	0	1	6	0.75	5	5	0.454545
Txn2	42479	42339	140	0.00329567	106509	7722	0.0675993	333699	27224	0.0754286
4930579H20Rik		0	0	0	0	0	0	22	0	0
4930579J19Rik		0	0	0	0	0	0	0	0	0
Bckdk	42059	42038	21	0.000499287	100661	456	0.00450958	499277	232	0.000464455
4930579M01Rik		0	0	0	0	0	0	0	0	0
4930579O11Rik		0	0	0	0	0	0	0	0	0
4930579P08Rik		0	0	0	402	28	0.0649652	0	8	0.888889
4930580E04Rik		0	0	0	0	0	0	0	0	0
Cdc42	42058	41661	397	0.00943912	1188214	45819	0.0371294	2595270	79378	0.0296779
4930583I09Rik		0	0	0	1	0	0	0	0	0
4930583K01Rik		0	0	0	1	1	0.333333	559	1	0.00178253
4930583P06Rik		0	0	0	0	0	0	0	0	0
4930584E12Rik		0	0	0	0	0	0	0	0	0
4930584F24Rik		0	1	0.5	0	876	0.99886	0	4	0.8
4930586N03Rik		0	58	0.983051	0	1	0.5	0	63	0.984375
4930587A21Rik		0	0	0	0	0	0	0	3	0.75
4930587E11Rik		0	0	0	0	0	0	0	0	0
4930588A03Rik		0	6	0.857143	0	66	0.985075	0	309	0.996774
4930588D02Rik		0	0	0	0	0	0	0	0	0
4930588G17Rik		0	29	0.966667	0	0	0	0	11	0.916667
4930588J15Rik		0	0	0	0	0	0	0	0	0
4930588K23Rik		0	28	0.965517	2	0	0	0	4	0.8
4930589L23Rik		0	0	0	0	0	0	378	0	0
4930589O11Rik		0	0	0	0	0	0	0	0	0
4930589P08Rik		0	0	0	0	0	0	0	0	0
4930590H14Rik		0	0	0	0	0	0	0	0	0
4930590J08Rik		0	2	0.666667	28	3480	0.991736	242	1330	0.845518
4930590L14Rik		0	0	0	0	0	0	0	0	0
4930590L20Rik		0	3	0.75	0	113	0.991228	0	12863	0.999922
4930591A17Rik		0	0	0	0	0	0	0	0	0
4930591E09Rik		0	0	0	0	0	0	1	0	0
4930592A05Rik		0	7	0.875	0	228	0.995633	8	13348	0.999326
Tm9sf2	42049	41940	109	0.00259215	478918	13647	0.0277059	1149666	14829	0.0127343
4930592I03Rik		0	0	0	0	0	0	0	0	0
4930593A02Rik		0	903	0.998894	0	1851	0.99946	10	2607	0.995798
4930593C16Rik		0	0	0	0	3	0.75	0	2	0.666667
4930594C11Rik		0	0	0	0	0	0	0	0	0
4930594M17Rik		0	0	0	2	0	0	0	0	0
4930594M22Rik		0	2	0.666667	0	0	0	233	589	0.715674
4930594M22Rik		0	0	0	0	0	0	100	0	0
4930594O21Rik		0	0	0	1	3	0.6	1	0	0
4930595D18Rik		0	0	0	0	0	0	22	292	0.926984
4930595L18Rik		0	0	0	0	0	0	0	0	0
4930595M18Rik		0	0	0	0	11	0.916667	0	0	0
4930595O18Rik		0	0	0	0	0	0	0	0	0
4930596D02Rik		0	0	0	6	0	0	0	0	0
4930596I21Rik		0	0	0	0	0	0	0	0	0
4930597A21Rik		0	0	0	0	2	0.666667	10	11	0.5
4930597G03Rik		0	0	0	0	14	0.933333	0	2	0.666667
4930597L12Rik		0	0	0	0	0	0	0	0	0
Clasp1	41662	35728	5934	0.142429	42502	25545	0.375397	144705	59505	0.29139
4930598F16Rik		0	0	0	0	6	0.857143	0	6	0.857143
4930598N05Rik		0	0	0	0	64	0.984615	0	10	0.909091
4930599A14Rik		0	0	0	0	0	0	0	0	0
Tle5	41574	41462	112	0.00269393	124722	3985	0.0309616	408247	2684	0.00653149
4930599N24Rik		0	0	0	0	0	0	0	0	0
4931400O07Rik		0	0	0	0	0	0	0	0	0
4931403E22Rik		0	15	0.9375	0	711	0.998596	0	717	0.998607
4931406B18Rik		0	0	0	0	0	0	6	4	0.363636
Sar1a	41540	41509	31	0.000746251	289828	958	0.00329451	1208364	2361	0.00195007
4931406G06Rik		0	27	0.964286	0	0	0	9	306	0.968354
Mt1	41466	41466	0	0	14740	0	0	1937586	2	1.03221e-06
4931407E12Rik		0	1	0.5	6	10	0.588235	0	20	0.952381
4931408C20Rik		0	0	0	4	21	0.807692	0	2	0.666667
4931412I15Rik		0	0	0	0	0	0	0	0	0
4931413I07Rik		0	0	0	0	0	0	122	9	0.0681818
4931413K12Rik		0	0	0	0	0	0	0	0	0
Prdx6	41420	41394	26	0.000627701	133059	103	0.000773488	689462	1147	0.00166085
4931415C17Rik		0	0	0	0	0	0	1285	0	0
4931417E11Rik		0	0	0	0	0	0	0	0	0
4931419H13Rik		0	55	0.982143	0	2	0.666667	0	29	0.966667
4931420L22Rik		0	0	0	0	4	0.8	0	0	0
4931422A03Rik		0	0	0	0	39	0.975	0	138	0.992806
Cct5	41379	41329	50	0.00120831	358810	834	0.00231895	1146299	1614	0.00140603
4931428L18Rik		0	39	0.975	0	87	0.988636	0	1731	0.999423
4931429L15Rik		0	0	0	112	302	0.727711	47	964	0.952569
4931429P17Rik		0	9	0.9	0	32	0.969697	0	110	0.990991
4931431B13Rik		0	1	0.5	0	0	0	0	0	0
4931431C16Rik		0	0	0	0	0	0	56	0	0
4931439C15Rik		0	0	0	0	0	0	0	0	0
4931440P22Rik		0	7	0.875	291	236	0.44697	335	517	0.606096
4932411K12Rik		0	67	0.985294	0	81	0.987805	20	612	0.966825
4932411N23Rik		0	0	0	2	0	0	0	0	0
4932412D23Rik		0	4	0.8	0	397	0.997487	2	389	0.992347
4932413F04Rik		0	0	0	0	0	0	0	0	0
4932414J04Rik		0	0	0	0	125	0.992063	1	6	0.75
4932414N04Rik		0	1	0.5	0	6	0.857143	0	43	0.977273
4932415D10Rik		0	0	0	0	18	0.947368	4	0	0
4932415M13Rik		0	0	0	0	1	0.5	0	0	0
4932416K20Rik		0	0	0	18	0	0	1	0	0
4932422M17Rik		0	0	0	0	0	0	0	0	0
4932429P05Rik		0	0	0	0	0	0	2	0	0
4932431L22Rik		0	0	0	0	0	0	0	0	0
4932431P20Rik		0	0	0	0	1	0.5	14	1	0.0625
4932435O22Rik		0	0	0	0	2	0.666667	106	68	0.388571
Lamp1	41323	41323	0	0	614921	2960	0.00479056	2500816	8188	0.00326345
4932438H23Rik		0	9	0.9	0	2	0.666667	824	620	0.429066
Coq7	41268	41251	17	0.000411931	23836	14	0.000586977	105983	134	0.00126275
4932442E05Rik		0	0	0	0	0	0	0	0	0
4932443L11Rik		0	0	0	0	0	0	1	28	0.933333
4932702P03Rik		0	0	0	0	50	0.980392	33	1	0.0285714
4933400A11Rik		0	0	0	0	0	0	0	0	0
4933400B14Rik		0	0	0	0	1	0.5	0	2	0.666667
4933400C23Rik		0	37	0.973684	0	33	0.970588	1	24	0.923077
4933400F21Rik		0	0	0	0	0	0	0	0	0
4933400L20Rik		0	96	0.989691	0	1529	0.999346	2	6	0.666667
4933401B06Rik		0	0	0	6	0	0	0	0	0
4933401D09Rik		0	0	0	0	0	0	0	2	0.666667
4933401H06Rik		0	0	0	0	0	0	0	0	0
4933401J01Rik		0	0	0	0	0	0	0	0	0
4933401L05Rik		0	0	0	0	0	0	82	5	0.0568182
4933402C05Rik		0	0	0	3	3	0.428571	0	0	0
Golga4	41253	40235	1018	0.0246764	63705	6776	0.096138	205460	23864	0.104062
4933402D24Rik		0	0	0	17	233	0.928287	0	42	0.976744
4933402E13Rik		0	0	0	0	0	0	0	0	0
4933402J07Rik		0	0	0	2	343	0.991329	0	2	0.666667
4933402J10Rik		0	0	0	0	1	0.5	0	15	0.9375
4933402J15Rik		0	0	0	0	0	0	0	0	0
4933402N03Rik		0	0	0	0	7	0.875	0	2	0.666667
Yif1a	41128	41121	7	0.000170196	120829	2175	0.0176822	758974	484	0.000637296
4933403L11Rik		0	0	0	0	0	0	0	0	0
4933403O08Rik		0	0	0	92	0	0	0	0	0
4933404G15Rik		0	0	0	0	77	0.987179	1	3	0.6
4933404I11Rik		0	0	0	0	62	0.984127	0	0	0
4933404K08Rik		0	0	0	0	0	0	0	0	0
4933404K13Rik		0	0	0	4	46	0.901961	0	3	0.75
4933404O12Rik		0	0	0	139	63	0.310345	5076	649	0.113343
Higd1a	41009	41009	0	0	85722	3098	0.0348791	233444	569	0.00243148
4933405E24Rik		0	50	0.980392	0	117	0.991525	0	82	0.987952
4933405L10Rik		0	0	0	0	0	0	310	0	0
4933405O20Rik		0	0	0	0	0	0	0	0	0
4933406B15Rik		0	0	0	0	0	0	8	0	0
4933406B17Rik		0	0	0	0	0	0	2	2	0.4
Cops4	40704	40583	121	0.00297261	155425	6546	0.0404144	587023	13537	0.0225406
4933406D12Rik		0	0	0	0	0	0	0	0	0
4933406F09Rik		0	69	0.985714	0	628	0.99841	0	4	0.8
4933406G16Rik		0	0	0	0	0	0	0	92	0.989247
4933406I18Rik		0	50	0.980392	94	1058	0.917606	1121	35595	0.969442
4933406J09Rik		0	2	0.666667	0	31	0.96875	0	7	0.875
4933406J10Rik		0	0	0	0	0	0	0	0	0
4933406K04Rik		0	2	0.666667	3	13	0.764706	0	1	0.5
4933406L23Rik		0	0	0	0	0	0	0	0	0
Pdrg1	40582	40582	0	0	114274	1047	0.00907893	252980	1879	0.00737268
4933407E24Rik		0	0	0	0	0	0	0	0	0
4933407I05Rik		0	0	0	0	0	0	0	0	0
4933407I08Rik		0	0	0	0	0	0	0	0	0
Eif4a2	40544	40530	14	0.000345295	237606	299	0.0012568	725843	2103	0.00288895
4933407L21Rik		0	0	0	0	10	0.909091	0	2	0.666667
4933408A14Rik		0	0	0	2	0	0	4	0	0
4933408J17Rik		0	0	0	0	2	0.666667	209	5	0.0232558
4933408N05Rik		0	0	0	0	0	0	17	0	0
Apoo	40208	39800	408	0.010147	25735	3817	0.129158	54477	3933	0.0673332
4933409F18Rik		0	0	0	0	80	0.987654	0	0	0
4933409G03Rik		0	0	0	0	453	0.997797	0	8	0.888889
4933409K07Rik		0	0	0	0	0	0	0	0	0
4933411E02Rik		0	0	0	0	51	0.980769	0	8	0.888889
4933411E06Rik		0	0	0	0	0	0	0	0	0
4933411E08Rik		0	42	0.976744	0	174	0.994286	88	0	0
4933411G06Rik		0	0	0	0	0	0	0	0	0
4933411K16Rik		0	0	0	0	0	0	0	0	0
4933411O13Rik		0	0	0	0	0	0	0	0	0
4933412A08Rik		0	0	0	15	0	0	1	0	0
Apobec2	40080	39504	576	0.0143709	4380	87	0.0194718	2823	846	0.230518
4933412E24Rik		0	0	0	0	0	0	0	0	0
4933412L11Rik		0	0	0	0	0	0	0	0	0
4933412O06Rik		0	0	0	0	106	0.990654	0	96	0.989691
4933413C19Rik		0	0	0	0	0	0	0	0	0
4933413J09Rik		0	23	0.958333	484	290	0.374194	37	7	0.155556
4933413L06Rik		0	0	0	0	0	0	0	0	0
4933414I15Rik		0	0	0	4	128	0.962406	0	2	0.666667
Sgcb	40068	39830	238	0.00593975	60459	214	0.00352705	624300	9827	0.0154969
4933415J04Rik		0	0	0	0	0	0	0	0	0
4933416E03Rik		0	24	0.96	0	507	0.998031	0	11	0.916667
4933416E14Rik		0	0	0	0	0	0	0	0	0
4933416I08Rik		0	0	0	0	0	0	0	0	0
4933416M07Rik		0	0	0	0	0	0	0	0	0
4933416O17Rik		0	0	0	4	0	0	0	0	0
4933417A18Rik		0	15	0.9375	0	1	0.5	2	22	0.88
4933417C20Rik		0	0	0	0	0	0	1402	0	0
Hspd1	39901	39886	15	0.000375921	172727	1360	0.00781214	641472	2284	0.00354792
4933417E11Rik		0	0	0	0	9	0.9	0	6	0.857143
4933417G07Rik		0	0	0	0	0	0	0	0	0
4933417O13Rik		0	0	0	81	0	0	108	0	0
4933421A08Rik		0	0	0	7	0	0	118	0	0
4933421D24Rik		0	0	0	0	0	0	0	0	0
4933421I07Rik		0	0	0	0	0	0	0	0	0
Selenop	39719	39667	52	0.00130916	1406338	5412	0.00383354	3411241	6684	0.00195557
4933422A05Rik		0	0	0	2	1	0.25	1322	169	0.113271
4933423L19Rik		0	0	0	0	0	0	1	0	0
4933423P22Rik		0	0	0	0	0	0	0	0	0
Poldip2	39642	39641	1	2.52251e-05	74967	1945	0.0252883	306501	3075	0.00993291
4933424G06Rik		0	23	0.958333	0	5	0.833333	0	2	0.666667
4933424H11Rik		0	0	0	0	0	0	0	0	0
4933424L21Rik		0	13	0.928571	0	207	0.995192	0	330	0.996979
Ctsl	39547	39245	302	0.00763629	766401	4019	0.00521663	4633183	21791	0.00468123
4933424N20Rik		0	0	0	0	0	0	0	0	0
4933425B07Rik		0	0	0	0	0	0	0	0	0
4933425D22Rik		0	0	0	0	0	0	0	0	0
Pmpcb	39355	39352	3	7.62273e-05	83716	93	0.00110965	225465	1127	0.00497368
4933426B08Rik		0	4	0.8	3	272	0.985507	110	3032	0.964683
4933426K07Rik		0	0	0	0	0	0	0	0	0
4933427D06Rik		0	115	0.991379	0	678	0.998527	0	169	0.994118
Dbi	39288	39217	71	0.00180712	95236	1537	0.0158824	621998	5287	0.00842837
4933427E11Rik		0	0	0	773	0	0	22	0	0
4933427E13Rik		0	197	0.994949	0	575	0.998264	0	14	0.933333
Pgm1	39172	37706	1466	0.0374237	22745	10698	0.319878	185270	22151	0.106792
4933427I04Rik		0	0	0	0	0	0	0	0	0
4933427I22Rik		0	2	0.666667	0	0	0	0	0	0
Psma7	39168	39156	12	0.000306365	324095	5755	0.0174473	808323	2270	0.00280042
4933428C19Rik		0	0	0	0	34	0.971429	0	2	0.666667
4933428G20Rik		0	0	0	1	0	0	0	1	0.5
4933428M09Rik		0	0	0	0	0	0	0	0	0
4933428P19Rik		0	0	0	0	0	0	23	0	0
4933429H19Rik		0	0	0	0	0	0	0	0	0
4933429O19Rik		0	106	0.990654	0	2	0.666667	0	0	0
4933430A20Rik		0	0	0	0	0	0	0	0	0
4933430H06Rik		0	0	0	0	0	0	0	0	0
4933430H16Rik		0	0	0	0	0	0	1	0	0
4933430I17Rik		0	0	0	0	0	0	718	68	0.0864041
Alas1	39162	39039	123	0.00314072	79973	2327	0.0282743	176070	2422	0.0135692
4933430M04Rik		0	0	0	0	0	0	0	0	0
4933430N04Rik		0	0	0	1	0	0	6	2	0.222222
4933431C10Rik		0	0	0	0	0	0	0	0	0
Trim54	39039	38104	935	0.0239498	4090	2	0.000488639	8305	10	0.0012025
4933431G14Rik		0	0	0	0	0	0	0	0	0
4933431J24Rik		0	0	0	0	0	0	0	0	0
Btg2	39032	39020	12	0.000307432	1994609	36236	0.0178428	3880450	66087	0.0167456
Bag3	39019	38459	560	0.0143516	150242	26255	0.148755	414884	147344	0.262071
4933431M02Rik		0	0	0	0	0	0	0	0	0
4933432G23Rik		0	0	0	0	0	0	2	0	0
4933432I03Rik		0	0	0	1812	34	0.0184082	4	91	0.947917
Rpl8	38956	38954	2	5.13387e-05	590679	304	0.000514396	1823904	291	0.000159522
4933432K03Rik		0	79	0.9875	0	153	0.993506	0	42	0.976744
4933433F19Rik		0	0	0	0	3	0.75	0	1	0.5
4933433G08Rik		0	0	0	0	0	0	0	0	0
4933433G15Rik		0	0	0	556	498	0.472038	1068	79	0.0688153
4933433G19Rik		0	94	0.989474	103	6858	0.985062	199	14623	0.986507
4933433H22Rik		0	0	0	24	91	0.784483	1670	614	0.268709
4933433N18Rik		0	0	0	4	6	0.545455	0	0	0
Ywhae	38838	38070	768	0.0197739	340009	68019	0.166701	763561	89499	0.104915
Capzb	38778	37007	1771	0.045669	492466	40732	0.0763917	937186	47697	0.0484291
Cct8	38745	38732	13	0.000335519	272101	4412	0.0159558	893931	8912	0.00987103
4933434P08Rik		0	0	0	0	0	0	0	0	0
4933435E02Rik		0	0	0	8	5	0.357143	2	0	0
4933435F18Rik		0	0	0	0	0	0	0	0	0
4933435G04Rik		0	0	0	39	0	0	0	0	0
4933436E23Rik		0	56	0.982456	0	35	0.972222	0	0	0
4933436F18Rik		0	0	0	0	0	0	0	0	0
4933436H12Rik		0	0	0	0	4	0.8	0	0	0
4933436I01Rik		0	0	0	0	0	0	0	0	0
4933436I20Rik		0	186	0.994652	0	124	0.992	0	958	0.998957
4933436N17Rik		0	0	0	0	0	0	0	0	0
4933436P19Rik		0	0	0	2	0	0	0	0	0
Pebp1	38732	38724	8	0.000206542	147088	186	0.00126294	816604	135	0.000165291
4933438A12Rik		0	0	0	0	6	0.857143	0	94	0.989474
4933438B17Rik		0	53	0.981481	7	511	0.984586	0	44	0.977778
4933438K21Rik		0	0	0	0	1	0.5	1	4	0.666667
Sord	38627	38552	75	0.0019416	55528	7	0.000126044	181205	2173	0.0118498
4933439J24Rik		0	0	0	0	0	0	0	0	0
4933439K11Rik		0	0	0	243	27	0.099631	20	4	0.16
4933439N06Rik		0	0	0	0	0	0	0	0	0
4933439N14Rik		0	0	0	0	0	0	0	0	0
Hsd17b10	38530	38517	13	0.000337391	55550	20	0.0003599	330613	211	0.000637799
4933440M02Rik		0	198	0.994975	0	490	0.997963	2	40	0.930233
Hsp90aa1	38439	38412	27	0.000702393	273857	6650	0.023707	1062698	4764	0.00446292
5031410I06Rik		0	0	0	0	0	0	0	0	0
5031415H12Rik		0	0	0	0	0	0	0	0	0
Fbxl22	38377	38309	68	0.00177185	5884	0	0	11184	666	0.0561978
5031425F14Rik		0	52	0.981132	0	0	0	1	3	0.6
5031434C07Rik		0	0	0	11	0	0	0	0	0
5031434O11Rik		0	0	0	1537	68	0.0423412	3750	1271	0.253086
Sptbn1	38372	34889	3483	0.0907669	1900128	480969	0.201995	2455948	511312	0.172318
Atp6v1g1	38327	38111	216	0.00563557	292329	15599	0.0506578	814242	14680	0.0177097
Fitm2	38325	38187	138	0.00360069	18516	199	0.0106326	51335	238	0.00461473
5033404E19Rik		0	0	0	0	0	0	0	0	0
5033406O09Rik		0	0	0	14888	4663	0.238492	3489	287	0.0759862
Tuba8	38303	38285	18	0.000469925	4210	5	0.00118596	557	0	0
5033421B08Rik		0	38	0.974359	0	84	0.988235	16	10	0.37037
5033423K11Rik		0	0	0	0	0	0	0	0	0
5033424D13Rik		0	0	0	0	0	0	0	0	0
5033425B01Rik		0	0	0	0	0	0	0	0	0
5033426E14Rik		0	2	0.666667	0	65	0.984848	0	4	0.8
5033426O07Rik		0	0	0	23	463	0.950719	1378	1768	0.561805
Mrpl4	38283	38278	5	0.000130603	156808	263	0.00167439	480210	3116	0.00644698
Selenow	38277	38256	21	0.000548618	435083	4406	0.0100253	1011473	4685	0.0046105
5330406M23Rik		0	0	0	0	0	0	0	0	0
5330409N07Rik		0	0	0	0	0	0	0	0	0
5330411J11Rik		0	0	0	0	4	0.8	0	0	0
Rack1	38217	38217	0	0	549804	305	0.000554435	2102823	1580	0.000750806
5330413D20Rik		0	0	0	0	0	0	0	0	0
5330413P13Rik		0	14	0.933333	4	189	0.974227	0	4	0.8
Ndfip1	38093	37590	503	0.0132042	406777	34513	0.0782092	1814994	140650	0.07192
Pcdh7	37944	13228	24716	0.651364	696	4593	0.868242	60928	209788	0.774935
5330417H12Rik		0	0	0	0	0	0	0	0	0
5330425B07Rik		0	0	0	0	0	0	0	0	0
5330426L24Rik		0	0	0	0	0	0	0	0	0
5330429C05Rik		0	0	0	0	0	0	0	0	0
5330431K02Rik		0	0	0	0	0	0	0	0	0
Stip1	37931	37822	109	0.00287356	200158	2297	0.0113457	448037	2942	0.00652357
5330437M03Rik		0	0	0	0	0	0	0	0	0
Comt	37574	37377	197	0.00524285	213842	12342	0.054566	1217705	89550	0.0685023
5330438I03Rik		0	0	0	0	0	0	0	0	0
5330439A09Rik		0	0	0	0	0	0	0	0	0
5330439B14Rik		0	0	0	0	0	0	0	0	0
mt-Nd3	37473	37473	0	0	301984	0	0	191495	0	0
5330439M10Rik		0	0	0	0	2	0.666667	0	0	0
5430400D12Rik		0	0	0	788	8	0.0100376	1690	12	0.00704639
5430401F13Rik		0	0	0	0	3	0.75	0	3	0.75
5430401H09Rik		0	0	0	1	263	0.992453	4316	4946	0.533952
5430402E10Rik		0	0	0	0	4	0.8	0	0	0
Ppp1r3a	37388	35501	1887	0.0504694	1143	23	0.0197087	1217	101	0.0765732
5430402P08Rik		0	0	0	24	16	0.390244	0	4	0.8
Hsp90b1	37341	37291	50	0.00133897	586043	8076	0.0135932	2711023	10546	0.00387497
5430403N17Rik		0	0	0	0	17	0.944444	1	100	0.980392
Mrpl51	37262	37256	6	0.000161018	57842	225	0.00387477	164880	271	0.00164091
5430414B19Rik		0	0	0	0	0	0	0	0	0
5430416N02Rik		0	0	0	64	1731	0.963808	432	58	0.118126
5430420F09Rik		0	0	0	0	0	0	0	0	0
5430421F17Rik		0	0	0	0	0	0	0	0	0
5430425E15Rik		0	0	0	0	0	0	0	0	0
5430425K12Rik		0	0	0	0	0	0	245	1295	0.840363
5430427M07Rik		0	0	0	0	0	0	0	0	0
5430427N15Rik		0	0	0	0	0	0	330	0	0
Parm1	37239	36017	1222	0.0328142	502	1031	0.672099	12817	256	0.0195808
Skp1a	37036	37033	3	8.10001e-05	232046	4115	0.0174245	958777	9894	0.010214
5430430K15Rik		0	0	0	0	0	0	0	0	0
Iscu	37018	37004	14	0.000378184	154135	5726	0.0358184	544798	11138	0.0200346
5430433H01Rik		0	0	0	0	0	0	0	0	0
5430434F05Rik		0	0	0	0	0	0	0	0	0
5430434I15Rik		0	0	0	425	575	0.574426	0	0	0
5430435K18Rik		0	0	0	0	0	0	0	0	0
5430437J10Rik		0	225	0.995575	0	170	0.994152	20	159	0.883333
5430440P10Rik		0	0	0	0	5	0.833333	85	1534	0.946914
5530400C23Rik		0	0	0	0	0	0	0	0	0
5530400K19Rik		0	0	0	0	0	0	0	0	0
5530401A14Rik		0	0	0	0	0	0	0	0	0
5530402G07Rik		0	0	0	0	0	0	0	0	0
Fkbp3	36935	36081	854	0.0231211	86804	1837	0.0207238	175064	2039	0.011513
5730403I07Rik		0	0	0	0	6	0.857143	0	6	0.857143
[truncated: 53,488 more rows]
[truncated: 2 more columns]

## Sheet: NonSpecificGenes
Gene	CM spliced	CM unspliced	ratio	EC spliced	EC unspliced	Ratio	FB spliced	FB unspliced	Ratio
Hivep2	3693	3847	0.510145	16597	147862	0.899076	52841	373811	0.876148
Lrrc8a	9	13	0.565217	483	2118	0.813989	499	5947	0.922445
Pan3	321	1522	0.82538	36264	141719	0.796246	66834	236232	0.779471
Ubn2	1642	1445	0.46794	17024	60737	0.781063	63145	153352	0.70833
1700025G04Rik	1978	384	0.162505	20601	67051	0.76496	41315	79077	0.656824
Asap1	1403	4982	0.780144	67042	209152	0.757262	118762	277992	0.700664
Cdk12	554	722	0.565388	21527	65633	0.753009	33236	123331	0.787715
Ctbp2	1098	780	0.415114	33451	77416	0.698272	59124	103580	0.636612
Asap2	496	2340	0.824815	38486	83338	0.68408	42635	66924	0.610843
Atxn1	3981	4195	0.513024	147596	316169	0.681743	191532	346002	0.643683
Fnip1	2996	1668	0.357556	17022	34424	0.669116	61419	83220	0.57536
Irf2	365	617	0.62767	20888	42199	0.668891	38216	53074	0.581372
Tmem140	184	283	0.604701	75914	151542	0.666245	78731	85336	0.520126
Ankhd1	3179	1708	0.349427	54112	101570	0.652415	101615	214548	0.678597
Psme4	28018	4559	0.139941	22835	40519	0.639555	59853	115640	0.65894
Smurf2	2754	309	0.100849	51043	88341	0.633791	73499	157435	0.681729
Dyrk1a	6454	1328	0.170628	56255	95189	0.628538	126930	127927	0.501954
Pdlim5	58163	9913	0.145615	81199	133528	0.621847	181995	156743	0.462725
Zfhx3	420	805	0.656607	27645	43637	0.612166	129460	132037	0.504925
Ppp2r2a	2893	2278	0.440449	63222	96701	0.604668	132920	218803	0.622087
Rnf216	1937	610	0.239403	43055	65361	0.602867	100983	103422	0.505964
Tmtc1	16767	4017	0.193264	62715	87854	0.583476	113544	141015	0.553956
Ate1	9196	2244	0.196137	55338	75810	0.578045	124967	160965	0.562947
Rsbn1l	1268	278	0.179703	16689	22402	0.573058	39297	27220	0.409213
Zfc3h1	2176	1015	0.317982	21860	28770	0.568229	49216	73991	0.600537
Ankrd17	10110	3064	0.232562	54988	71545	0.565421	118676	105054	0.469555
Jmjd1c	5736	2200	0.277183	67834	87324	0.562803	122514	202094	0.622577
Ulk2	2949	596	0.168077	35917	45857	0.56077	76689	115519	0.601007
Wwc2	3033	2214	0.421875	97825	124799	0.560579	157434	203271	0.563537
Ablim1	20075	6536	0.245603	498669	625456	0.556393	423972	163144	0.277873
Gpbp1l1	843	1020	0.54721	8009	9744	0.548834	12944	16726	0.563715
Fnbp1	2527	1517	0.375031	8612	10450	0.548182	60213	66656	0.525388
Sbf2	3470	854	0.197457	70907	84902	0.544907	144394	114635	0.442555
Vcl	3323	1869	0.359908	61696	73724	0.544406	83361	144044	0.633422
Pip4k2a	332	251	0.429795	24664	29378	0.543604	102243	65107	0.389045
Tpp2	7043	685	0.0886272	41075	48476	0.541317	93562	80298	0.461852
Slc25a46	4143	1063	0.204148	13448	15080	0.528585	37538	22993	0.379849
Brwd1	2631	1198	0.312794	29339	31809	0.520188	44530	141871	0.761102
Nbeal1	7150	805	0.101181	69935	75061	0.517673	142016	102808	0.419924
Nek7	11524	1865	0.139283	70185	70744	0.50198	152854	126883	0.453578
Ano6	566	463	0.449515	63531	63938	0.501593	98394	98710	0.500799
Baz2b	3043	2769	0.476346	117903	114124	0.491854	189467	232857	0.551369
Mark2	1778	554	0.237462	42950	41389	0.49074	67525	83054	0.551561
Stk24	3387	615	0.153635	21747	20644	0.486979	98414	44618	0.311942
Ubp1	867	35	0.0387597	14582	13644	0.483367	54838	30357	0.35632
Ppp6r3	8134	3594	0.30642	69015	63302	0.478408	99848	96446	0.491332
Vamp5	6411	1276	0.165973	76489	69823	0.477217	88544	62917	0.415398
Wdfy3	3065	606	0.165033	43023	38233	0.470519	92819	58665	0.387266
Trak1	14667	1314	0.0822175	41065	35698	0.465036	87689	141563	0.617497
Phactr4	2561	973	0.275248	56041	48153	0.462143	56459	63530	0.529461
Ccdc82	836	324	0.27907	34534	29597	0.461501	51119	38387	0.428871
Gls	3816	475	0.110671	47226	40372	0.460873	87803	75861	0.463514
Pum1	4754	1529	0.243316	96345	81336	0.457762	168361	164552	0.494278
Mbd2	1828	530	0.224671	34251	28627	0.455271	59687	32878	0.355184
Nsd1	8703	1984	0.185629	103962	86513	0.454194	198799	217286	0.522214
Dock1	7682	1568	0.169495	144886	118921	0.450786	212391	138558	0.394808
Atrn	2791	428	0.132919	66748	54762	0.450675	110810	63946	0.365914
Cap1	924	128	0.121557	28429	23025	0.447478	84132	31226	0.270685
Rc3h1	4453	2180	0.32861	92882	73614	0.442134	197451	97023	0.329478
Top1	4457	1336	0.230583	69382	54905	0.441756	162769	136234	0.455626
Pcf11	1119	184	0.141104	17762	13755	0.436417	47846	32601	0.405243
Rusc2	1223	2277	0.650386	31130	23872	0.434013	31637	48172	0.603584
Chchd3	54816	4819	0.0808069	77753	59573	0.433804	167392	136634	0.449414
Arhgef12	7574	1464	0.161965	170747	130357	0.432929	246729	281102	0.53256
Fyn	1815	1222	0.402238	126536	95922	0.43119	176054	105602	0.374931
Strn3	14986	2670	0.151215	147152	111079	0.430152	260408	215823	0.453189
Nipbl	5633	1680	0.229696	116291	86978	0.427894	244021	142385	0.368485
Edem1	1600	546	0.254308	35358	25860	0.422418	142253	21066	0.128986
Abi1	2217	1061	0.323574	99921	72521	0.420551	213807	1351170	0.86338
Cux1	9500	3144	0.248636	60951	43796	0.418108	160059	94470	0.371155
Shoc2	2632	152	0.0545781	17940	12706	0.414592	35663	17356	0.327348
Fbxw11	6219	216	0.0335612	66926	47068	0.412895	132721	86317	0.394071
Rbpms	26798	5698	0.175339	177480	124167	0.411629	287446	219129	0.432569
Kcmf1	7588	553	0.0679194	58511	40734	0.410435	137916	84627	0.380271
Prdm2	1442	961	0.39975	62379	42921	0.407603	97053	51767	0.347847
Azi2	7481	593	0.0734365	34108	23255	0.405394	85711	40027	0.318334
Btbd1	10719	512	0.045584	33972	22576	0.399229	104162	29287	0.21946
Abca1	950	205	0.177336	20129	13300	0.397846	98227	72101	0.423304
Wbp11	2628	34	0.0127676	23880	15627	0.39554	57613	29444	0.338211
Birc6	8019	395	0.04694	104584	68407	0.395434	191481	112203	0.369472
Fxr1	18042	1393	0.0716711	45239	29508	0.394766	94302	53300	0.361104
Ehmt1	2213	691	0.237866	53902	35135	0.394607	95603	91482	0.488984
Tep1	1189	23	0.0189613	5931	3821	0.391777	42736	18127	0.297828
Spag9	7145	2147	0.231034	129375	83260	0.391561	153882	141590	0.479198
Wwp1	4617	312	0.063286	11367	7241	0.389113	51231	19896	0.279721
Macf1	30960	3328	0.0970574	202161	128513	0.388638	365719	217708	0.373153
Rasa1	2336	210	0.0824499	52157	32476	0.383723	65089	48629	0.427624
Zdhhc20	1469	310	0.174157	85219	53019	0.383531	130752	52134	0.285061
Smg1	3127	589	0.158461	50822	31524	0.382819	87167	77678	0.471216
Mdfic	514	60	0.104348	96123	58409	0.377971	135312	70054	0.341116
Tet2	485	334	0.407317	44406	26251	0.371522	70885	56670	0.444275
Gnaq	5275	3353	0.388573	292852	172015	0.37003	514479	213111	0.292899
Gtf2i	13748	1145	0.0768766	86557	49587	0.364222	128632	59336	0.315669
Kpna4	4931	230	0.0445564	61796	35121	0.362379	125330	60463	0.32543
Mgrn1	21284	2661	0.111125	49197	27468	0.358281	130915	34197	0.207113
Klf7	1851	352	0.15971	363531	202833	0.358131	342657	167850	0.32879
Rbm25	4149	242	0.0551002	96155	51784	0.350034	220433	120150	0.352776
Smchd1	2149	347	0.138967	50995	26910	0.345416	134627	35374	0.20808
Chd1	1476	450	0.233524	61153	31774	0.341921	64840	41134	0.388148
Ccnt1	3155	215	0.0637793	91653	47532	0.3415	155321	79505	0.338568
Arl5b	893	37	0.0397422	23349	12046	0.340321	23086	22010	0.488059
Luc7l3	2759	309	0.100684	40082	20181	0.334877	113524	39303	0.257171
Mbnl2	16509	3414	0.171351	355398	177321	0.33286	529166	242559	0.314307
Zmiz1	4073	2655	0.394561	144134	71677	0.332127	170172	141528	0.454051
U2af2	405	204	0.334426	17045	8458	0.331634	37901	9735	0.204358
Zmynd8	1137	422	0.270513	36171	17936	0.331485	82843	30432	0.268654
Map3k3	1796	540	0.231065	135564	66139	0.327901	162285	88556	0.353035
Trip12	7602	578	0.0706515	69817	33683	0.325436	117192	70425	0.375364
Setx	4564	208	0.0435785	82378	39552	0.32438	101598	54186	0.347826
Sec24b	2708	231	0.0785714	52257	24895	0.322671	148139	34184	0.18749
Ep400	2358	331	0.123048	71108	33656	0.321252	131369	42479	0.244344
Wdr89	350	8	0.0222841	5093	2399	0.320165	29638	4641	0.135385
Sh3kbp1	25241	1346	0.0506243	34137	16025	0.319459	148682	37091	0.199657
Iqsec1	3068	1867	0.378241	38406	17606	0.31432	63919	14536	0.185276
Gak	2274	357	0.135638	56023	25499	0.312783	106502	88579	0.45406
Sacm1l	3088	426	0.121195	32528	14489	0.308159	57543	41678	0.420048
Nfkb1	2943	1216	0.292308	103952	46027	0.306888	140323	151756	0.51957
Peli1	2450	549	0.183	71046	30603	0.301062	167355	63181	0.27406
Wwtr1	8611	974	0.101607	381707	164413	0.301056	408525	216571	0.34646
Herc2	4818	386	0.0741595	76543	32165	0.295882	154602	44285	0.222663
Rab10	6399	879	0.120758	84363	35053	0.293534	168959	62020	0.268508
Kif1b	18021	1461	0.0749885	141707	58522	0.292274	256650	104045	0.288456
Pik3ca	4024	210	0.0495868	34272	13929	0.288971	95466	23657	0.198591
1810013L24Rik	3908	4067	0.509905	61747	24731	0.285977	159159	52766	0.248983
Rbbp6	3962	412	0.0941714	48991	19372	0.283366	99679	18551	0.156905
Ctcf	2193	160	0.0679694	57219	22420	0.281517	145085	44266	0.233776
Atrx	7149	393	0.0521013	111872	43786	0.281294	207551	63922	0.235463
Ckap5	8468	1805	0.175686	60491	23525	0.280003	130500	50982	0.280919
Sltm	3149	1643	0.342792	54692	21047	0.277885	90176	46281	0.339159
Ep300	3569	116	0.0314704	36041	13771	0.276454	72055	23035	0.242242
Rnf144a	0	65	0.984848	114904	43817	0.276061	89670	20977	0.189583
Rbms1	11511	3426	0.229348	420922	160044	0.275479	890402	420009	0.320517
Rad23b	2719	547	0.167432	18621	6985	0.272777	35647	13939	0.281102
Eif4g1	9487	372	0.0377282	89822	33446	0.271325	184166	92169	0.33354
Pum2	8148	435	0.0506757	118122	43709	0.270089	146498	58343	0.28482
Mprip	7575	1125	0.129295	166983	61742	0.269939	230387	56202	0.196106
Hk1	9685	53	0.00544204	55881	20146	0.264981	120329	19154	0.13732
Mdm2	7855	290	0.0356003	55416	19852	0.263747	106022	24342	0.186722
Msrb3	12893	1319	0.0928024	87326	31083	0.262503	182015	58889	0.244449
Glyr1	2457	105	0.0409676	82350	28967	0.260218	164304	129554	0.440871
Mier1	1767	626	0.261487	128473	44840	0.258721	240351	53230	0.181312
Map2k4	11371	383	0.0325819	77808	27090	0.258248	107447	38248	0.262519
1810026B05Rik	1259	11	0.0086546	7217	2507	0.257789	23341	5150	0.180752
Gna13	4542	697	0.133015	60032	20735	0.256723	167055	16075	0.0877787
Sfpq	1825	524	0.222979	35802	12257	0.255035	58624	13825	0.190821
Rbm27	3630	116	0.0309581	54893	18785	0.254957	97534	28409	0.225569
Tsc22d2	2683	163	0.0572532	40795	13958	0.254922	86403	31114	0.264759
Arid5b	4785	586	0.109084	207174	70633	0.254251	267510	107738	0.287111
Elf2	3449	499	0.126361	96656	32552	0.251933	158894	44123	0.217335
Rock2	16064	1113	0.0647922	159035	52712	0.248937	337101	104905	0.237338
Ndufs4	68652	2116	0.0299001	98339	31636	0.243399	272143	79414	0.225892
Smg7	4345	605	0.122198	45437	14420	0.240903	67871	36356	0.348812
Nbr1	11725	182	0.0152838	72357	22930	0.240639	152429	26230	0.146815
Slc25a12	59406	2469	0.0399024	61630	19472	0.24009	231607	59008	0.203045
Papola	10069	696	0.064648	190535	60162	0.239978	332092	75351	0.184936
Sf1	7071	84	0.0117384	71556	22075	0.235763	149429	17159	0.103002
Dcun1d1	5637	956	0.14498	46055	14151	0.235039	111427	44872	0.287089
Arhgef2	1295	80	0.0581395	86960	26647	0.234552	121021	22589	0.157293
B3gnt2	90	2	0.0215054	4497	1326	0.227679	6920	5299	0.433633
Thoc2	3207	285	0.0815918	85647	25112	0.226724	177740	48304	0.213692
Ahctf1	2569	24	0.00925212	53873	15702	0.225681	91035	12674	0.122206
Usp47	12645	779	0.0580261	72132	20992	0.225417	149807	50091	0.250582
Prkacb	5743	38	0.00657212	49389	14135	0.222511	99582	15456	0.134354
Fbxl5	10725	385	0.0346503	44164	12529	0.220993	136836	18848	0.121065
Pcmtd1	6235	1567	0.20082	110634	31163	0.21977	187204	34134	0.154216
Syne2	7133	672	0.0860876	195839	54982	0.219207	227219	67824	0.229878
Arid4a	2551	167	0.0614196	79869	22156	0.21716	158446	50084	0.240175
Cbfb	1396	144	0.0934458	67910	18613	0.21512	125164	32417	0.205715
Tnks2	5805	311	0.0508419	101748	27798	0.214578	196014	49876	0.202838
Ube2g1	12821	648	0.0481069	96866	26018	0.211726	179464	61428	0.255001
Riok3	8033	114	0.0139912	59708	15823	0.209487	103214	18633	0.15292
Cltc	20560	776	0.0363687	141965	37325	0.208181	401452	62087	0.133941
Ssh2	9551	2973	0.237365	329716	85509	0.205934	460586	206839	0.309906
Nudcd3	8376	351	0.0402154	76996	19962	0.205881	134816	36172	0.211546
Zfand6	18065	555	0.0298051	147652	38085	0.205047	362342	72023	0.165812
Tspan9	5407	1179	0.178989	290672	74321	0.203623	228075	64071	0.219311
Osmr	2414	1272	0.344996	141106	35932	0.202961	158926	46475	0.226264
Khdrbs1	2214	145	0.0614407	61462	15527	0.201676	141813	45993	0.244895
Smad1	2021	96	0.0453258	162668	40917	0.200981	161372	32081	0.165833
Stim2	1685	1708	0.503241	207046	51832	0.200217	256444	43178	0.144108
Mark3	4203	156	0.0357798	59111	14733	0.199512	131221	26763	0.169402
Fus	754	289	0.27682	25770	6380	0.198439	44306	13115	0.228397
Adam17	1171	67	0.0540759	57607	14152	0.197213	100531	27288	0.213488
Dync1li2	7496	905	0.107712	80305	19669	0.196739	165360	33464	0.168309
Tab2	6008	254	0.0405556	43493	10646	0.196638	105260	17060	0.139469
Ndufs1	90519	412	0.00453086	53887	13186	0.196589	150553	19304	0.113648
Rb1cc1	9650	565	0.0553054	96993	23452	0.19471	185646	40792	0.180146
Furin	2906	90	0.03003	22134	5336	0.194241	44680	5198	0.104212
Dlat	46616	536	0.0113673	33922	8155	0.193807	91252	11258	0.109822
Srsf4	1022	82	0.0742081	33073	7926	0.193317	79327	10092	0.112861
Rab31	7204	56	0.00771244	201160	46882	0.189008	444753	20994	0.0450759
Raf1	16871	506	0.0291173	69688	16073	0.187414	151352	31382	0.171735
Akirin1	5331	60	0.0111276	110665	25468	0.18708	208652	47564	0.18564
Epn2	5055	377	0.0693908	235762	53999	0.186356	222479	60273	0.213165
Brd1	2502	38	0.0149547	48103	11002	0.18614	88863	8779	0.0899092
Tacc1	6510	1397	0.176657	288167	65248	0.184621	581063	332783	0.364156
Rab8b	177	1988	0.917821	41280	9245	0.182975	124342	73646	0.37197
Azin1	8733	1421	0.139931	107240	24010	0.182932	149037	21849	0.127856
Dhx15	3200	98	0.029706	60099	13453	0.182902	124851	16040	0.113846
Zfp207	6603	470	0.0664405	165631	36768	0.18166	345476	42300	0.109083
Nek9	10694	237	0.0216795	67787	15015	0.181334	123198	36246	0.227326
Taok3	401	1042	0.721607	45526	10023	0.180432	201483	60690	0.231487
Ppp2r5c	14621	1078	0.0686624	243933	53651	0.180288	356194	73231	0.170532
Lsm14a	2427	25	0.0101916	66430	14599	0.180168	135969	31500	0.188093
Dync1h1	15166	746	0.0468799	141637	31058	0.179842	235343	54088	0.186876
Ccnd3	11649	882	0.0703798	299896	65488	0.17923	418572	240806	0.365201
Fermt2	19181	162	0.00837469	386217	84001	0.178642	387732	113928	0.227102
Cept1	3340	594	0.150953	149990	32293	0.177158	231818	31355	0.119142
Mapk1	17161	927	0.0512466	166689	35670	0.17627	394200	43177	0.0987178
Myo6	931	176	0.158845	209082	44503	0.175495	174606	40370	0.187788
Nrd1	23967	349	0.0143521	79229	16635	0.173525	143324	33672	0.190241
Map2k1	10647	445	0.0401154	172858	36000	0.172365	421035	42742	0.0921605
Mob2	10832	1167	0.09725	179411	37220	0.171812	251788	70707	0.219249
Rlim	10133	385	0.0366004	111826	23180	0.171695	242033	44562	0.155487
Cpsf6	3205	76	0.0231566	80419	16338	0.168854	135268	24756	0.154701
Rfc1	5635	47	0.00827028	67359	13292	0.164807	147622	30589	0.171644
Mfap1a	1704	11	0.00641026	33624	6602	0.164119	65075	5305	0.0753755
Atp2b4	638	146	0.185987	48880	9563	0.163627	88015	23404	0.210052
Ythdf1	2027	896	0.30643	58610	11464	0.163596	125180	16088	0.113882
Csnk1a1	28775	2729	0.0866212	274829	53572	0.163129	607515	76118	0.111343
Larp4	3565	156	0.041913	53024	10194	0.161249	96067	22980	0.193031
Limd1	6299	147	0.0228013	50130	9628	0.161114	206382	17767	0.0792639
Paip1	2743	114	0.039888	56232	10610	0.15873	120918	14568	0.107523
Mcmbp	4150	826	0.165963	203568	37188	0.154463	357061	37089	0.0940985
Nck1	4733	198	0.040146	274180	49763	0.153616	292363	69791	0.19271
Rnf115	3178	428	0.118658	131079	23704	0.153142	170060	34875	0.170175
Cflar	1481	135	0.0834879	86802	15683	0.153026	126475	43358	0.255296
Ubr4	7894	131	0.016322	55595	9909	0.151271	113580	16199	0.124819
Pxk	3998	101	0.0246341	77787	13779	0.15048	146282	20094	0.120774
Mtmr2	3467	393	0.101787	132178	23310	0.149914	129628	18662	0.125847
Stat3	18620	1446	0.0720586	226005	39174	0.147726	462099	113180	0.196739
Ogdh	284897	2804	0.0097462	192683	33299	0.147352	433650	58268	0.11845
Zcrb1	15055	304	0.0197917	49846	8376	0.143861	112641	15451	0.120623
Tmpo	3978	159	0.0384244	113266	18851	0.142683	200616	20207	0.0915073
Mapre2	17678	186	0.0104114	102642	16977	0.141924	225689	43628	0.161994
Pdcd10	2326	418	0.152277	103494	17020	0.141227	173976	18455	0.095904
Arid1a	5643	435	0.0715578	88389	14412	0.140192	179519	30209	0.144038
Ndufs3	76287	445	0.00579933	90267	14690	0.139961	284011	23599	0.076717
Pdzd8	1557	502	0.243689	42409	6888	0.139722	80908	13063	0.139009
Nemf	11033	565	0.0487111	95733	15499	0.139338	181545	25870	0.124725
Snx5	9238	152	0.0161857	82381	13271	0.138741	327746	25261	0.0715593
Znfx1	2380	75	0.0305375	115178	18373	0.137572	162078	29610	0.154469
Pkig	51552	1328	0.025113	79468	12648	0.137304	186810	19347	0.0938455
Rtn3	12293	1670	0.119593	461209	73354	0.137222	707630	117199	0.142089
Fas	3695	44	0.0117647	183929	28979	0.13611	238450	11673	0.0466689
Caprin1	13936	129	0.00917105	126067	19779	0.135615	269860	31677	0.105051
Snap23	13989	946	0.0633369	152521	23887	0.135407	334625	26248	0.0727345
Ube2a	8812	19	0.00215127	71235	11100	0.134813	140339	23695	0.144451
Cgnl1	1241	92	0.0689655	75134	11621	0.13395	196530	37456	0.160077
Angel2	3610	105	0.0282562	101940	15646	0.133059	167749	20860	0.110599
Slc44a2	9636	83	0.00853909	252961	37785	0.129958	314804	39005	0.110243
Ppp3r1	667	32	0.0457143	7469	1114	0.129776	16659	3428	0.170649
Actr1a	14233	201	0.0139245	212594	31570	0.129298	342991	43715	0.113044
Setd3	8579	49	0.00567853	108591	15763	0.126758	206659	19601	0.08663
Pepd	7321	334	0.0436259	55244	7993	0.126396	256541	7660	0.028993
Hnrnpd	2163	51	0.0230248	58824	8488	0.126097	116615	9762	0.0772445
Nmi	1649	93	0.0533563	126679	18093	0.124975	190901	16142	0.0779641
Ddx46	3536	215	0.0573028	69633	9773	0.123075	113365	8253	0.0678595
Slc30a9	19145	842	0.0421253	61456	8564	0.122306	133009	24142	0.153622
Nol7	8619	59	0.00679802	59514	8226	0.121433	136578	5225	0.0368466
Glod4	7728	1165	0.130987	44962	6132	0.120012	113850	15878	0.122394
Col4a1	5993	613	0.0927804	637885	86244	0.1191	736973	152088	0.171066
Sbds	9548	552	0.0546481	232587	31335	0.118728	405375	58873	0.126813
Vta1	7873	10	0.00126839	108788	14640	0.118611	252297	25659	0.0923128
Luc7l	1206	28	0.0226721	42831	5746	0.118284	76681	11673	0.132115
Gsr	2928	249	0.0783512	93571	12532	0.118111	134539	21439	0.137448
Ccnl2	4510	136	0.0292662	84553	11304	0.117924	152410	13316	0.080349
Mat2a	18744	698	0.0358998	251031	33477	0.117666	501262	36108	0.0671938
Nap1l4	32125	358	0.0110208	184709	23861	0.114402	368501	29403	0.0738945
Tomm70a	5801	217	0.0360525	58877	7589	0.114177	110069	17392	0.136449
Pls3	5282	242	0.0438009	592089	74189	0.111348	552767	52447	0.0866585
Chordc1	11169	206	0.0181083	67060	8367	0.110927	131245	11482	0.0804467
Zfp664	417	95	0.185185	17296	2072	0.106975	16762	5064	0.232006
Pcbp2	13986	898	0.0603292	206951	24775	0.106915	296421	59160	0.166375
Hmgcl	22318	22	0.000984737	151505	17990	0.106138	334066	22622	0.0634222
Coro1c	555	20	0.0347222	182369	21539	0.10563	325964	29185	0.0821765
Hcfc1	5773	12	0.00207397	61608	7268	0.105521	114578	6926	0.0570018
Ddx17	5594	176	0.0304973	160746	18906	0.105236	323374	42618	0.116445
Slbp	3202	26	0.00805203	66518	7776	0.104664	126012	6838	0.0514712
Atp6v1a	3535	107	0.0293714	157422	18236	0.103815	279214	16124	0.0545949
Ccz1	7013	87	0.0122518	52580	6054	0.103249	125918	17179	0.120051
Pptc7	9517	281	0.0286764	24787	2847	0.103022	48417	5990	0.110094
Tpm1	1154182	2074	0.00179372	434115	49560	0.102465	707595	65029	0.0841663
Pxdn	1734	430	0.198614	188778	21279	0.101301	210303	16209	0.0715588
Ywhag	5175	13	0.0025053	20669	2298	0.100052	47808	7155	0.130176
Abhd12	12118	457	0.0363391	70045	7776	0.0999203	366111	7620	0.0203889
Crk	8330	112	0.0132654	185949	20606	0.0997599	227169	18503	0.0753156
Ensa	2665	45	0.016599	20689	2280	0.0992599	78227	1426	0.0179024
Tmbim4	21542	190	0.00874247	160189	17594	0.0989628	330663	28442	0.0792022
Dars	12987	110	0.00839823	143741	15779	0.0989149	267358	17021	0.059853
Rad21	6160	110	0.0175411	71461	7811	0.0985329	131630	12400	0.0860926
Yaf2	7658	242	0.030629	72703	7886	0.0978533	135260	18645	0.121145
Vps4b	2139	130	0.0572687	70013	7565	0.0975135	111700	10438	0.08546
Sertad2	3105	262	0.077791	125408	13374	0.0963663	170843	19681	0.103299
Cox7b	114520	1108	0.00958237	65376	6926	0.0957913	214670	9949	0.0442926
Klf3	2326	1150	0.330745	249734	26085	0.0945725	426389	17582	0.0396016
Gnpat	56484	235	0.00414316	65140	6802	0.0945471	163774	16567	0.0918643
Atp2c1	5327	896	0.143959	63999	6681	0.0945233	96130	14194	0.128656
Tsc22d4	10046	44	0.00436032	15746	1592	0.0918161	45850	1579	0.0332912
Cnih4	13924	359	0.025133	67607	6790	0.0912659	159920	4064	0.0247828
Gosr2	6876	94	0.0134844	180073	17976	0.090765	224568	20438	0.083418
Clec2d	259	51	0.163987	59637	5864	0.089524	70344	3724	0.0502774
Fam76a	3569	460	0.114144	103396	9977	0.0880008	194307	20910	0.0971573
Dnajc7	5391	111	0.0201708	97662	9417	0.0879436	159927	28045	0.149197
Exosc10	6934	21	0.00301898	100218	9385	0.0856264	209578	9095	0.0415916
Med1	5143	60	0.0115296	104465	9546	0.083728	205579	12218	0.0560979
Sbno1	7396	134	0.0177931	159261	14499	0.0834422	307691	23838	0.071903
Slain2	8676	72	0.00822951	76139	6887	0.0829489	82506	7564	0.0839782
Dnajc8	11022	202	0.0179955	145829	13072	0.0822645	259264	6521	0.0245348
Uba2	5685	347	0.057517	170904	14679	0.0790963	330710	39359	0.106356
Ankrd40	15734	969	0.0580101	46947	4029	0.0790356	111452	13867	0.110653
Ndel1	10185	2176	0.176023	563668	48172	0.0787329	645953	66642	0.09352
Sars	10847	397	0.0353046	147230	12572	0.0786719	354048	16489	0.0445002
Stx12	9193	61	0.00659103	354645	30142	0.078334	391378	36514	0.0853344
Inpp4a	5610	208	0.035745	135778	11459	0.0778264	252191	16749	0.0622776
Sdhc	78544	459	0.00580983	98209	8287	0.0778144	292052	9424	0.0312594
Snx2	7122	304	0.0409317	207408	17190	0.0765364	483654	26781	0.0524669
Rala	10618	166	0.0153917	115419	9561	0.0764996	208264	16844	0.074826
Akirin2	6156	119	0.0189611	39217	3248	0.0764847	104332	5702	0.0518199
Clk1	6417	146	0.0222425	84329	6858	0.0752073	199865	20319	0.0922815
Fbxo3	6761	223	0.0319256	71721	5750	0.0742204	144187	14614	0.0920265
Acadl	181473	1165	0.0063787	163994	13142	0.0741912	466899	21269	0.0435689
Sp110	474	47	0.0900383	78661	6292	0.0740636	135117	3412	0.02463
Cnot2	14648	172	0.0116052	70999	5637	0.0735545	164866	5461	0.0320617
Smtn	16334	3012	0.155683	288764	22828	0.0732622	314778	16616	0.0501396
Ndfip2	3430	27	0.00780798	145661	11423	0.0727186	235947	12756	0.0512899
Cd2ap	570	463	0.447776	120513	9370	0.0721413	134617	18880	0.122998
Vps72	4502	61	0.0133655	80933	6189	0.0710375	166270	7596	0.0436886
Mknk2	6943	106	0.0150355	49750	3799	0.070943	97791	9072	0.0848929
Pcif1	4324	125	0.0280899	112695	8463	0.0698504	248277	17053	0.0642707
Zdhhc5	3972	128	0.0312119	13420	999	0.0692788	47187	5722	0.108146
Tardbp	2002	4	0.00199302	25904	1926	0.0692034	57005	296	0.00516561
Dnaja2	42314	340	0.00797093	169644	12570	0.0689844	416797	23362	0.0530762
Sun1	5312	129	0.0237045	118862	8742	0.0685083	162383	11186	0.0644466
Api5	8286	65	0.00778257	138697	10112	0.0679524	187459	6492	0.0334722
Usp4	12959	831	0.0602567	156339	11380	0.0678512	239584	24073	0.0913039
Litaf	5860	142	0.0236548	484541	35136	0.0676111	1059825	53106	0.0477172
Fbxw2	5947	70	0.0116318	214035	15499	0.0675235	361791	17325	0.0456983
Akap8	3417	330	0.088047	54547	3850	0.0659269	99434	7739	0.0722097
Sirpa	1605	126	0.0727483	1943	135	0.0649351	133170	35562	0.210759
Psmb7	18205	356	0.019179	86935	6034	0.0649027	187397	9015	0.0458982
Cs	177231	614	0.00345243	153295	10584	0.0645838	359753	22532	0.0589402
Sec24c	3976	82	0.020202	32311	2206	0.0639087	71750	4673	0.0611457
Cotl1	87	2	0.0222222	4680	314	0.0628629	62765	141	0.0022414
Ifih1	1731	11	0.00631096	134410	9011	0.0628286	184839	12887	0.0651757
Hnrnpl	950	168	0.150134	18630	1231	0.0619776	43167	2641	0.0576524
B230219D22Rik	7998	4	0.000499813	136236	8838	0.0609202	223177	11586	0.0493517
Trappc1	5910	0	0	43392	2759	0.0597807	105869	2511	0.0231683
Blmh	8443	378	0.0428474	116210	7354	0.0595152	273348	16319	0.0563369
Ubl3	21511	407	0.0185684	284632	17995	0.0594624	718829	38449	0.0507726
Ifngr2	35304	307	0.00862069	85467	5380	0.0592198	252771	4927	0.0191192
Sorbs3	2198	376	0.146019	286790	18010	0.0590877	445915	30641	0.0642966
Glud1	16256	296	0.017882	228821	14190	0.0583922	600260	22030	0.0354014
Zfand5	17344	235	0.0133675	179518	11114	0.0583005	316224	18117	0.054187
Zcchc8	1906	394	0.17123	44154	2733	0.0582878	100333	4871	0.0463001
Trnau1ap	7229	0	0	111993	6893	0.0579794	143990	9303	0.0606873
Dnaja1	10607	153	0.014218	393809	24216	0.0579294	630123	31562	0.0476994
Rnpep	3829	25	0.00648508	96269	5865	0.057424	241669	5803	0.023449
Ivns1abp	47902	1370	0.0278043	94684	5750	0.057251	208150	7878	0.0364673
Polr2a	2259	13	0.00571931	50258	3044	0.0571075	93651	10716	0.102675
Ncoa4	1477	12	0.00805369	11690	708	0.0571014	30451	1379	0.0433225
Dnajc5	8064	237	0.0285473	131202	7809	0.056175	208382	14365	0.0644899
Tcf3	858	0	0	105171	6247	0.0560676	119662	3740	0.0303072
Ifnar1	893	83	0.0849539	52944	3132	0.0558518	103025	2895	0.0273317
Prpf8	12217	8	0.000654343	91035	5349	0.0554962	206503	7740	0.036127
Ncaph2	15040	4	0.000265869	156688	9143	0.0551341	342162	10480	0.0297184
Sf3b1	21337	702	0.0318512	316147	18381	0.0549459	708728	43342	0.0576302
Wsb1	2677	10	0.00372024	114590	6642	0.0547871	142756	12382	0.0798123
Dld	57119	394	0.00685051	111130	6381	0.0543008	297433	19635	0.0619266
Ppp1cc	3844	16	0.004144	45664	2614	0.0541436	118738	4458	0.0361859
Phf5a	7001	56	0.00793426	77564	4417	0.0538777	162165	1048	0.00642102
Prr14	4340	228	0.0499015	112502	6387	0.0537219	173542	15426	0.0816324
Arl4a	3160	658	0.172296	32342	1820	0.053274	76729	2254	0.0285374
Map2k3	12337	41	0.00331206	200296	11220	0.0530454	310847	21849	0.0656724
Irgm1	412	236	0.363636	37255	2073	0.0527092	38933	1527	0.03774
Fam129b	1639	72	0.0420561	111219	6162	0.0524953	170273	12601	0.068905
Ctsh	8438	377	0.0427632	21257	1174	0.0523359	587217	4075	0.00689168
Slc38a2	16225	56	0.00343938	68765	3788	0.0522094	154997	5389	0.0336
Klf4	1791	38	0.020765	275608	15143	0.0520822	283718	20248	0.0666125
Sart1	3448	53	0.0151342	81408	4448	0.0518071	174144	5503	0.0306321
Acot13	54246	174	0.0031973	23282	1269	0.0516862	76500	5163	0.0632225
Dbnl	4629	176	0.0366209	161640	8769	0.0514582	275181	8225	0.0290219
Gnas	1757	336	0.160458	66742	3601	0.0511913	83454	4776	0.0541306
Hsd17b12	5433	439	0.0747489	185556	9922	0.0507574	437833	18874	0.0413262
Ubxn2a	10916	135	0.012215	102855	5448	0.0503029	129205	5318	0.039532
Mob4	6341	276	0.0417044	124109	6561	0.0502101	251138	6518	0.0252972
Cdc5l	6238	15	0.00239846	132408	6956	0.0499121	246146	11180	0.0434467
Csnk2a1	6746	99	0.014461	197159	10241	0.0493778	364435	22889	0.0590951
Polr2j	7831	3	0.000382897	55033	2702	0.0467992	124664	1304	0.0103518
Tmem128	2425	0	0	102997	5020	0.0464737	120399	2471	0.0201105
Tmem179b	2077	39	0.0184223	54551	2655	0.0464104	130060	7649	0.0555443
Rnf4	6176	79	0.0126279	149874	7281	0.0463298	279901	6110	0.0213627
Snf8	3417	304	0.0816765	38468	1849	0.0458604	73669	9186	0.110867
2610507B11Rik	18077	76	0.00418641	63884	3064	0.0457662	170437	10889	0.0600517
Lasp1	1303	130	0.0906555	185572	8855	0.0455439	293572	9630	0.0317609
Immt	93299	71	0.000760407	193365	9155	0.0452052	402756	15094	0.0361229
Cdc34	10721	117	0.0107944	38908	1826	0.0448263	83657	794	0.00940179
Commd7	3651	0	0	90584	4132	0.0436247	223597	6360	0.0276572
Bzw1	12590	11	0.000872877	226882	10349	0.043624	400217	9711	0.0236895
Gmfb	2708	34	0.0123952	65771	2952	0.0429544	134038	2937	0.0214417
Mysm1	3814	38	0.00986244	177076	7889	0.0426511	276964	9656	0.0336891
Ngdn	6415	39	0.00604183	96933	4277	0.0422583	182418	6026	0.0319775
Trim12c	155	20	0.113636	102764	4511	0.0420504	128738	5163	0.038558
Tpr	22722	146	0.00638419	221391	9668	0.0418419	495796	17917	0.0348774
Rnf20	4275	1103	0.205057	83486	3609	0.041437	169701	5118	0.0292758
Sar1b	30743	188	0.00607785	151094	6529	0.0414214	334137	11881	0.0343363
Ddx21	1204	30	0.0242915	32502	1399	0.041266	65968	3101	0.0448965
Kdm6b	1456	8	0.00546075	78940	3358	0.0408024	112409	9092	0.07483
Ndufv2	227456	456	0.00200076	210083	8751	0.039989	601716	16147	0.0261336
Leprotl1	7285	218	0.0290512	133304	5509	0.0396862	266641	2785	0.0103368
Mafk	2056	126	0.0577187	127033	5232	0.0395567	177474	14817	0.0770547
Becn1	7572	2	0.000264026	123333	5062	0.0394249	240782	4502	0.0183542
Ifi35	2808	2	0.000711491	217018	8793	0.0389395	315908	19008	0.0567544
Per1	2235	229	0.0929006	53512	2163	0.0388498	117344	14008	0.106644
Rbfa	6384	61	0.00946323	46110	1850	0.038573	98933	98	0.000989579
Fam168b	1767	55	0.03017	60366	2374	0.0378381	128306	2843	0.0216775
4833439L19Rik	42462	88	0.00206811	272868	10657	0.0375874	471210	22079	0.0447587
Secisbp2l	3462	168	0.0462682	172263	6695	0.0374108	303325	19149	0.0593813
Mrps36	14012	33	0.00234942	25974	1002	0.0371428	66092	1677	0.0247455
Dynll2	6997	0	0	9449	364	0.0370899	39537	1130	0.027786
Stx7	16862	6	0.000355682	170806	6427	0.0362628	391533	10008	0.0249239
Psmg4	1454	0	0	29500	1099	0.035915	67601	2515	0.0358686
Atp6v1b2	15451	55	0.00354679	134055	4917	0.035381	294275	9175	0.0302355
Prpf38b	1371	36	0.0255682	99041	3602	0.0350922	166665	3637	0.0213561
Ndufa12	89931	11	0.0001223	66879	2392	0.0345305	174349	1316	0.00749149
Dusp11	3860	55	0.0140449	64143	2286	0.0344122	111205	3952	0.0343181
Anapc2	4750	34	0.00710554	197136	6990	0.0342434	375941	8258	0.021494
Bud31	4365	32	0.00727603	68603	2426	0.0341546	132675	4155	0.0303659
Nrbp1	21363	128	0.0059557	293178	10032	0.0330859	473209	13935	0.0286054
Ptpn1	2819	174	0.0581162	86650	2945	0.0328698	200391	8337	0.0399417
Gnb4	1944	90	0.044226	169825	5743	0.0327108	326262	3967	0.0120128
Tax1bp1	29551	314	0.0105136	359278	12135	0.0326724	841589	19257	0.0223698
Atp5d	189660	438	0.00230406	283056	9507	0.0324955	931671	6341	0.00676003
Mrpl42	119147	317	0.0026535	99108	3325	0.0324599	245760	1796	0.00725489
Nub1	4839	64	0.0130506	60187	2002	0.0321917	127146	3432	0.0262829
Tax1bp3	8490	212	0.0243594	266335	8670	0.0315266	436924	5901	0.0133258
Lta4h	12826	140	0.0107966	255887	8272	0.0313144	401356	9279	0.0225967
Nup88	18718	279	0.0146858	103068	3315	0.0311607	235845	9917	0.0403519
Leng8	1767	39	0.0215827	35190	1131	0.0311382	43995	1702	0.0372445
Dcaf7	8364	2	0.000239034	98449	3131	0.0308227	182371	10324	0.0535766
Fh1	101281	78	0.000769534	100875	3202	0.0307654	286994	1756	0.00608136
Pon2	18476	47	0.00253725	244833	7684	0.0304295	627123	8825	0.0138769
Tox4	4023	0	0	70447	2205	0.0303497	155168	2597	0.0164611
Acsl5	1028	1	0.000970874	165952	5186	0.0303029	285490	6076	0.0208391
Wbp4	5286	59	0.0110363	79362	2465	0.0301242	121258	7514	0.0583507
Atp1b3	19779	83	0.00417862	510138	15798	0.0300378	1194179	27827	0.0227716
Hnrnpa2b1	28564	494	0.0169999	346674	10627	0.0297423	732808	15367	0.0205393
Cwc15	9340	112	0.0118481	93211	2832	0.0294865	198165	2765	0.0137609
Mrpl18	35463	143	0.00401606	63534	1929	0.0294666	163403	1519	0.00921036
Scamp2	8868	90	0.0100458	126134	3765	0.0289838	373745	8344	0.0218378
Atp5k	16763	118	0.00698969	32366	965	0.0289512	73611	292	0.00395107
Uqcrc2	154421	324	0.00209375	217165	6417	0.0287008	477959	15778	0.0319562
Pcna	6777	0	0	105622	3121	0.0287004	221552	1937	0.00866705
Fam114a2	8520	262	0.0298304	124751	3664	0.0285323	223958	9448	0.0404786
Capn2	8954	32	0.0035607	483259	14114	0.028377	789007	32744	0.0398466
Abcf1	11678	41	0.00349829	110659	3218	0.0282583	216654	12472	0.0544327
Ercc1	12850	168	0.0129042	160984	4665	0.0281618	218590	2797	0.0126339
Ndufa10	193734	359	0.00184962	122196	3497	0.0278215	486265	8474	0.0171282
Sdha	196888	445	0.00225506	329747	9412	0.0277509	756498	13354	0.0173462
Bag6	4967	0	0	29797	844	0.0275439	47285	941	0.0195119
Csnk1e	3293	3	0.000909918	132931	3731	0.0273007	248732	3561	0.0141145
Ece1	8696	119	0.0134982	1115346	31257	0.0272605	1526777	104993	0.064343
Pabpc1	4413	0	0	96765	2696	0.0271058	324143	3325	0.0101536
Vps36	10205	68	0.00661865	110383	3047	0.0268621	145775	12812	0.080788
Eftud2	6324	716	0.10169	108959	2968	0.026517	228056	8949	0.0377585
Fosl2	1996	132	0.0620009	64203	1713	0.0259872	150382	5768	0.0369386
Rbm22	1044	0	0	33641	894	0.025886	54853	1016	0.0181851
Ddx3x	6774	97	0.0141153	273139	7251	0.0258603	343228	17217	0.0477658
Lsm6	7751	95	0.0121065	73698	1955	0.0258413	156597	1544	0.00976338
Tbc1d15	4398	30	0.00677354	115909	2915	0.0245319	208218	7078	0.0328755
BC005537	9006	55	0.0060693	67045	1651	0.0240331	163678	10451	0.0600184
Sdhb	358261	357	0.000995485	273623	6700	0.0239009	830927	18960	0.0223088
Fam174a	14115	25	0.00176791	143975	3493	0.0236863	270542	4360	0.0158601
Pomp	22301	10	0.000448189	169914	4116	0.023651	396308	853	0.00214774
Nosip	6162	17	0.00275081	125925	3048	0.0236327	195309	1870	0.00948372
Atp5l	25764	117	0.00452052	38219	922	0.0235553	114617	1096	0.00947163
Atp6v1d	25718	235	0.00905448	109591	2613	0.0232877	273877	5079	0.0182071
Sun2	2214	65	0.0285088	56611	1323	0.0228359	143457	1303	0.00900104
Cr1l	10008	114	0.0112615	421414	9612	0.0223002	513763	6354	0.0122165
Fubp1	5442	215	0.0379993	111976	2520	0.0220093	137214	7667	0.0529189
Msl1	370	18	0.0462725	5182	116	0.0218909	9629	771	0.0741275
Prickle3	2011	36	0.0175781	93249	2061	0.0216239	38994	1861	0.0455502
Rit1	16832	96	0.00567074	145004	3173	0.0214134	268016	5164	0.0189032
Clta	11818	215	0.017866	215831	4695	0.0212899	586928	8613	0.0144625
Mfap3	3301	1	0.000302755	176785	3833	0.0212215	238736	5462	0.022367
Arl2bp	4764	9	0.00188521	120580	2590	0.0210277	171814	898	0.00519938
Rnps1	8727	0	0	84185	1807	0.0210133	163582	3482	0.0208422
Strn4	11583	1	8.63185e-05	164202	3498	0.0208586	176547	2209	0.0123576
Brox	4015	164	0.0392344	87411	1854	0.0207694	122161	1448	0.0117143
Fkbp3	36081	854	0.0231211	86804	1837	0.0207238	175064	2039	0.011513
Brd2	3823	2	0.000522739	108550	2274	0.0205188	250160	6259	0.0244092
Prpf4b	3739	10	0.00266667	70891	1484	0.020504	104747	2350	0.0219425
Lpl	266413	2040	0.00759907	1627645	33480	0.020155	2615856	19097	0.00724756
Nt5c	2346	0	0	62866	1276	0.0198931	147811	489	0.00329735
Ewsr1	12720	200	0.0154787	290285	5879	0.0198504	618596	18454	0.0289679
Tor3a	777	8	0.0101781	169253	3403	0.0197096	278840	11320	0.0390128
Ndufs2	206220	47	0.000227859	314528	6283	0.0195847	828264	6247	0.00748581
Cdc42ep2	3447	0	0	287716	5722	0.0194998	385939	715	0.00184919
Ddx54	1744	0	0	117823	2320	0.0193102	130045	2342	0.0176904
Pdhb	170021	418	0.00245248	145894	2861	0.0192328	354207	3435	0.00960455
Atp6v1e1	25098	40	0.00159115	158115	3022	0.0187541	287652	9747	0.032774
Cndp2	4516	1	0.000221337	96631	1834	0.0186257	418240	3553	0.00842354
Tsnax	9598	369	0.0370185	466474	8820	0.0185569	453879	6360	0.0138189
Tcn2	15705	758	0.0460398	497014	9361	0.0184863	1103212	4521	0.0040813
Vdac2	96198	455	0.00470751	314404	5887	0.0183801	671803	5141	0.00759441
Hnrnpu	9537	345	0.0349084	308283	5653	0.0180068	564909	14410	0.024874
Plin2	10673	206	0.0189338	173804	3174	0.0179343	422744	4709	0.0110164
Sdhd	134928	94	0.000696178	203664	3648	0.0175966	505769	1477	0.0029118
Blvrb	3173	23	0.00719424	42733	752	0.0172929	283362	2975	0.0103898
Kpnb1	6932	42	0.00602151	65846	1092	0.0163134	142526	4283	0.0291738
Ndufs5	43093	88	0.00203789	91089	1509	0.0162961	206597	1059	0.00509976
Plscr3	2681	4	0.0014892	122293	2017	0.0162254	197061	888	0.00448598
Ddx47	8397	26	0.00308642	131823	2140	0.0159744	314800	2838	0.00893467
Fbxo22	2070	67	0.0313377	67364	1090	0.0159229	91236	5320	0.055097
Nono	10175	30	0.00293945	227831	3683	0.0159083	478977	2347	0.00487612
Hnrnph1	6850	48	0.00695753	189982	3061	0.0158565	368071	8418	0.0223592
Csde1	78784	213	0.00269627	317805	5116	0.0158428	664932	14514	0.0213615
Slc31a2	3989	0	0	162206	2604	0.0157999	338852	5149	0.0149679
Lbh	10367	179	0.0169717	13580	218	0.0157982	88180	4432	0.0478551
Atp5c1	389304	1176	0.00301167	417335	6525	0.0153942	1109972	11189	0.00997982
Uqcrh	99012	10	0.000100987	103863	1602	0.0151897	284506	6484	0.0222825
Psmd4	25774	7	0.000271507	214551	3209	0.0147363	535970	3413	0.00632759
Sin3b	8982	118	0.0129656	138408	2054	0.0146231	280346	6546	0.0228169
Esyt1	2372	118	0.0473705	118943	1717	0.01423	227203	1943	0.00847927
Cdk9	3706	0	0	122832	1741	0.0139756	231449	827	0.0035604
Chmp5	6062	1	0.000164908	265716	3750	0.0139164	372281	6108	0.0161421
Arl6ip1	4215	0	0	286335	3965	0.0136582	554061	4590	0.00821621
Ndufv1	254319	237	0.000931029	190970	2637	0.0136203	507850	1994	0.00391099
Ap2s1	6207	325	0.0497474	101058	1379	0.0134618	270875	437	0.00161069
Ctdnep1	3217	30	0.00923645	20541	279	0.0133999	39435	1348	0.0330522
Eif3c	17580	3	0.00017061	222999	2989	0.0132263	481243	7469	0.015283
Cnot8	16733	26	0.00155131	180923	2415	0.0131723	391342	11410	0.02833
Stat6	8280	119	0.0141667	160987	2110	0.012937	326657	2655	0.00806224
Acadm	148030	125	0.000843705	95589	1247	0.0128773	313642	5275	0.0165403
Atp5h	278134	845	0.00302889	220382	2844	0.0127404	572662	2670	0.00464079
Acvrl1	4829	2	0.000413907	627375	8066	0.0126935	809050	9489	0.0115926
Mtpn	5854	29	0.00492862	284531	3650	0.0126656	440916	3433	0.00772589
Idh2	217653	278	0.00127563	176385	2262	0.0126618	478986	5458	0.0112665
Sike1	7964	50	0.0062383	125347	1597	0.0125803	194598	3923	0.019761
Ndufab1	147330	492	0.0033283	88402	1120	0.0125108	249896	2853	0.0112878
Ndufb3	36478	99	0.00270654	77440	967	0.0123329	203975	3782	0.0182039
Uqcr10	85212	64	0.000750495	106656	1323	0.0122523	237755	1319	0.0055171
Sdcbp	14444	53	0.00365568	534701	6627	0.0122421	1047732	13669	0.0128782
Ak2	10072	66	0.00650952	59923	728	0.0120029	122816	290	0.00235567
Cox8a	53798	43	0.000798633	237450	2827	0.0117655	724493	3875	0.00532011
Ddx24	12799	29	0.0022605	112964	1341	0.0117317	268204	1903	0.00704533
Ppm1g	6664	0	0	128311	1512	0.0116465	224847	5648	0.0245037
Sub1	14867	10	0.000672133	171198	2014	0.0116273	345200	2001	0.00576322
Stip1	37822	109	0.00287356	200158	2297	0.0113457	448037	2942	0.00652357
Ndufb6	61987	9	0.000145168	72748	833	0.0113207	218939	2944	0.0132682
Irf3	2295	42	0.0179641	71674	809	0.0111611	136427	887	0.0064596
Gusb	3757	12	0.00318302	153318	1716	0.0110685	476597	3624	0.00754651
Csnk2b	11145	11	0.000985928	123079	1371	0.0110164	232475	3022	0.0128324
Flii	8642	0	0	171799	1898	0.010927	335404	1540	0.00457048
Mafg	4389	17	0.0038575	126037	1361	0.010683	355162	1399	0.00392358
Bnip3	21221	69	0.00324081	91054	956	0.0103901	120394	765	0.00631397
Med10	7992	66	0.0081896	110104	1134	0.0101943	210443	232	0.00110122
Srsf1	3271	4	0.001221	36165	370	0.010127	80991	568	0.0069642
Leprot	7906	30	0.00377977	405245	4127	0.0100813	819510	3793	0.00460705
Trafd1	4137	4	0.000965717	98970	989	0.00989396	212618	3485	0.0161265
Nfe2l1	11701	30	0.00255711	100422	948	0.00935179	163681	248	0.00151284
Pdrg1	40582	0	0	114274	1047	0.00907893	252980	1879	0.00737268
Tomm20	14471	119	0.00815571	84568	770	0.00902284	147310	1904	0.0127601
Stk11	9210	155	0.0165492	85201	754	0.00877193	221246	4756	0.021044
Gemin7	14334	0	0	190926	1684	0.00874301	385264	2715	0.00699778
Aco2	189923	638	0.00334799	186185	1613	0.00858897	339651	4043	0.0117633
Dtx3l	1165	0	0	70020	602	0.00852414	93223	1520	0.0160432
Pnrc2	9483	17	0.00178929	215586	1845	0.00848541	379555	876	0.00230265
Fxyd5	1478	0	0	150336	1259	0.00830497	450473	1571	0.00347532
Shisa5	6630	23	0.00345657	838017	6983	0.0082639	1815875	3796	0.00208609
Timm8b	17202	161	0.00927206	32307	268	0.00822692	80938	333	0.00409735
Psmc1	25399	1	3.93685e-05	278455	2232	0.00795189	477481	3715	0.00772033
Uqcrc1	516501	183	0.000354181	580966	4525	0.00772854	1321832	10993	0.00824789
Pak1ip1	5780	0	0	231877	1721	0.00736733	281577	744	0.00263529
Ywhab	20412	0	0	734338	5439	0.00735221	1301697	3938	0.00301615
D8Ertd738e	32887	1	3.04053e-05	200637	1470	0.00727334	480783	878	0.00182286
Hfe	5673	231	0.0391194	160534	1172	0.00724768	425686	2486	0.00580606
Ubqln1	7462	112	0.0147855	121005	820	0.00673091	253601	5301	0.0204748
Cript	11732	6	0.000511117	133465	884	0.00657983	247060	1073	0.00432428
Rab14	22655	85	0.00373774	267554	1771	0.00657567	668516	4590	0.00681912
Upf1	2838	0	0	34359	226	0.00653444	52644	802	0.0150055
Ech1	349677	151	0.000431639	373733	2426	0.00644938	917754	4961	0.00537652
Ctdsp1	3240	15	0.00460688	43351	279	0.00639454	65926	441	0.00664477
Sparcl1	24780	132	0.00529844	4255287	26729	0.00624215	5205578	12567	0.00240833
Mgat1	7401	32	0.00430455	270752	1603	0.00588568	351000	2375	0.00672089
Dpf2	6490	14	0.00215219	100021	591	0.00587399	206521	2159	0.0103459
Ndufb10	200428	15	7.48339e-05	173344	1003	0.00575286	505229	547	0.0010815
Tmem50b	16737	3	0.000179201	96264	548	0.0056604	192785	3431	0.0174857
Polr2l	3675	55	0.0147414	26321	149	0.0056288	65467	956	0.0143924
Pea15a	9743	12	0.00123001	810169	4505	0.00552981	1356819	6593	0.00483566
Pgk1	42814	21	0.000490242	109475	601	0.00545981	240670	53	0.000220169
Crat	78333	34	0.000433851	65970	362	0.00545731	248424	4008	0.0158775
Atp5a1	547642	133	0.0002428	577563	3138	0.0054038	1518363	3803	0.00249841
Ndufb9	134084	1	7.4579e-06	123843	667	0.00535696	325352	2470	0.00753455
Rab1b	20358	44	0.00215655	169793	890	0.00521431	310195	208	0.000670094
Idh3b	158877	397	0.00249254	214692	1116	0.00517124	499692	659	0.00131707
Gabarapl2	14840	21	0.001413	206185	1047	0.00505228	365937	5880	0.0158142
Eif4a3	11891	52	0.00435365	333943	1573	0.00468829	596394	5695	0.00945872
Ogfr	1802	0	0	163395	755	0.00459942	211152	325	0.0015368
Mkrn1	5140	0	0	92235	414	0.00446843	209354	1105	0.0052504
Got2	76536	251	0.00326874	116978	519	0.0044171	308006	4253	0.0136201
Aph1a	2290	5	0.0021777	53934	235	0.00433819	109875	127	0.00115451
Rbck1	4497	217	0.0460233	327092	1406	0.00428007	468016	2002	0.0042594
Serpinb9	3842	0	0	236300	1007	0.00424343	263797	1223	0.00461473
Mfsd1	3268	0	0	138080	566	0.00408231	253286	5499	0.0212492
Camk1	19556	1	5.113e-05	199173	813	0.00406526	567358	1185	0.00208427
Tnfrsf1a	4037	0	0	302605	1234	0.00406135	521778	502	0.000961168
Tpra1	11429	56	0.0048755	118306	479	0.00403246	223608	268	0.00119709
Mxd4	4736	0	0	399637	1613	0.00401993	487962	1796	0.00366711
Trim8	2194	111	0.0481353	81735	324	0.00394833	223205	5609	0.0245133
Grn	16262	40	0.00245354	668740	2625	0.00390994	2442978	950	0.000388718
Mrpl51	37256	6	0.000161018	57842	225	0.00387477	164880	271	0.00164091
Zbtb7a	1485	17	0.0113107	101108	383	0.0037737	196767	478	0.00242337
Zfp706	52906	75	0.00141558	281749	1057	0.00373753	619091	1109	0.00178813
Eci1	66238	159	0.00239465	109823	411	0.0037284	235296	1985	0.00836557
Crip2	580857	473	0.00081365	2576314	9460	0.00365848	4711375	7612	0.00161306
Atxn2l	1900	7	0.00366876	18698	64	0.00341097	50148	654	0.0128733
Syf2	10351	2	0.000193162	209035	687	0.00327575	355527	186	0.000522892
Mapre1	14615	287	0.0192579	350808	1132	0.00321645	627780	4278	0.00676836
Ramp2	3375	0	0	360548	1119	0.003094	509967	1331	0.00260317
Uqcrfs1	318924	0	0	202477	620	0.00305271	427119	1024	0.00239172
Ssna1	11714	0	0	129030	391	0.00302112	262848	176	0.000669138
Prelid1	10910	0	0	342436	980	0.00285367	812105	1300	0.00159822
M6pr	10960	63	0.0057148	291273	803	0.00274928	627648	1140	0.00181301
Gna11	26462	33	0.00124547	766486	2064	0.00268557	925198	3383	0.00364319
Dctn1	8906	93	0.0103333	127880	339	0.00264389	213588	223	0.00104297
Ndufb8	188456	48	0.000254635	145123	384	0.00263903	340022	332	0.000975452
Rfk	31576	20	0.000632971	245051	645	0.00262518	428429	308	0.000718387
Bag5	8789	1	0.000113753	299884	774	0.00257435	437061	309	0.000706494
Ctsa	33539	8	0.000238464	299186	772	0.00257369	1184091	723	0.000610222
Lmo2	111	1	0.00884956	5536	14	0.00252207	20052	0	0
Lsm2	1311	0	0	39704	100	0.00251225	78243	148	0.00188795
Ndufs7	214842	251	0.00116693	260496	631	0.00241644	791680	2375	0.00299097
Irf9	2352	0	0	128709	311	0.00241046	235291	574	0.00243359
Psmd2	32580	30	0.000919935	282643	677	0.00238952	673488	3286	0.00485538
Mta2	3584	5	0.00139276	158738	373	0.00234426	206588	1510	0.00725616
Ltbr	1787	0	0	98657	223	0.00225524	162261	789	0.00483898
Dnajb1	6089	56	0.00911162	176088	395	0.00223816	326241	2525	0.00768021
Ip6k1	1357	0	0	125784	279	0.00221316	215656	304	0.00140766
Idh3a	199564	553	0.00276337	117999	261	0.00220698	291486	412	0.00141145
Tmem134	12143	0	0	53966	119	0.0022002	148059	129	0.00087051
Ghitm	166770	248	0.00148486	376939	822	0.00217597	822350	1905	0.00231118
Ccnd2	36624	0	0	380561	794	0.00208204	953612	3472	0.00362768
Polr2c	14192	8	0.000563341	111738	225	0.00200957	213296	202	0.00094614
Mrps18c	7141	22	0.00307091	52516	105	0.00199536	98355	3352	0.0329571
Gbp2	986	282	0.222222	383379	748	0.00194727	499965	1496	0.00298328
Tomm22	13105	0	0	134456	231	0.00171507	308958	586	0.0018931
Ppp1r11	7457	66	0.00877193	94000	156	0.00165681	142227	158	0.00110966
Mrpl12	58669	22	0.000374838	98662	162	0.00163926	240367	1116	0.00462142
Cib1	3055	0	0	71223	112	0.00157003	121387	211	0.00173521
Mllt6	3627	174	0.0457654	85860	135	0.00156984	116114	444	0.00380923
Cct7	54398	80	0.00146846	405501	628	0.0015463	849248	541	0.000636628
Cisd1	98740	13	0.00013164	60775	94	0.00154427	160926	406	0.00251653
Taf10	5474	0	0	85452	121	0.00141398	160236	39	0.00024333
Ssbp4	3366	0	0	86588	115	0.00132635	157070	497	0.00315419
Atp5g1	622754	520	0.000834303	173277	229	0.00131983	492179	1880	0.00380521
Rbm3	6710	0	0	87910	112	0.00127239	188400	553	0.00292664
Mdh2	463625	155	0.000334209	528335	624	0.00117967	1403662	1660	0.00118122
Nars	12021	21	0.00174375	132109	136	0.00102839	365296	1156	0.00315457
Paqr4	4058	0	0	97589	81	0.000829315	163189	102	0.000624648
Ube2l6	951	0	0	139823	114	0.000814646	229983	874	0.00378588
Ptbp1	1096	0	0	69911	51	0.000728957	165530	635	0.00382148
Slc25a3	393868	34	8.63157e-05	433870	306	0.000704782	1388554	745	0.000536241
Mfge8	21879	4	0.000182782	953423	664	0.000695953	1662077	181	0.000108888
Tmem160	18754	4	0.000213231	81271	49	0.00060255	189705	53	0.000279302
Xab2	3017	0	0	163326	95	0.000581317	303790	183	0.000602025
Cnp	693	1	0.00143885	33162	19	0.0005726	78680	729	0.0091802
Tpp1	15037	27	0.00179223	260169	127	0.000487904	580965	159	0.000273607
Ndufa2	71006	2	2.81654e-05	117018	45	0.000384405	355405	438	0.00123088
Ldb1	2782	28	0.00996087	49525	16	0.000322958	94842	227	0.00238771
Ndufs6	93477	4	4.2789e-05	124942	40	0.000320044	313806	230	0.000732398
Ppp1r15a	3607	0	0	96079	29	0.000301741	242620	46	0.00018956
Cyc1	211952	7	3.30251e-05	232271	70	0.00030128	510953	184	0.000359981
Ndufa11	74160	46	0.000619888	53076	15	0.000282528	154616	915	0.00588303
Pam16	5568	1	0.000179533	15473	4	0.000258431	31733	12	0.000378
Atp5g3	98344	50	0.000508156	94139	24	0.000254874	228482	108	0.00047246
Aldoa	855193	57	6.66471e-05	1469736	373	0.000253723	3878872	888	0.00022888
Ndufa1	68947	13	0.000188512	106468	23	0.000215979	265294	378	0.0014228
Polr2e	18178	0	0	255922	54	0.000210956	507047	253	0.000498718
Slc25a11	148596	4	2.69177e-05	128725	25	0.000194173	473258	299	0.00063139
Idh3g	213946	45	0.000210288	234910	36	0.000153226	738180	480	0.000649824
Mrpl34	22110	3	0.000135661	58266	7	0.000120122	125509	6	4.78027e-05
Atp5o	223869	91	0.000406321	160103	16	9.99251e-05	361778	79	0.000218318
Cops6	48331	4	8.27541e-05	181963	17	9.34163e-05	434721	29	6.67048e-05
Lypla2	2681	0	0	35297	3	8.49834e-05	72477	28	0.000386175
Aurkaip1	21344	0	0	83835	6	7.15632e-05	216673	13	5.99944e-05
Ndufb5	140752	297	0.00210564	129156	9	6.96778e-05	321051	48	0.000149486
Ube2m	11173	4	0.000357846	28866	2	6.92785e-05	78531	31	0.000394588
Pgd	2013	7	0.00346363	52032	3	5.76524e-05	169742	899	0.00526834
Tmem109	36145	0	0	492646	26	5.27733e-05	1014078	588	0.0005795
Tufm	22402	2	8.92658e-05	53663	2	3.72675e-05	181374	30	0.000165376
Lmf2	8164	0	0	282778	10	3.53621e-05	366742	35	9.54256e-05
Rbm8a	7677	0	0	128032	3	2.34309e-05	265233	546	0.00205433
Sec11c	6237	0	0	44790	1	2.23254e-05	123770	13	0.000105022
Nudt3	34608	0	0	98959	1	1.0105e-05	213404	0	0
Zfp36	7592	0	0	393135	1	2.54364e-06	1258894	0	0
Aldoa	0	0	0	88	0	0	300	0	0
Atp5o	0	0	0	0	0	0	1	6	0.75
Rhob	2707	0	0	210144	0	0	363042	0	0
Gnb2	1531	0	0	33732	0	0	55065	1	1.81597e-05
Arf6	3012	0	0	159120	0	0	328104	0	0
Filip1l	806	0	0	3337	0	0	12188	0	0
Ube2v1	617	0	0	4631	0	0	9292	0	0
Dctn3	9576	0	0	89693	0	0	167245	0	0
Cenpb	0	0	0	0	0	0	0	0	0
Aup1	4808	0	0	128463	0	0	286727	0	0
Neat1	17513	0	0	171691	0	0	394462	1	2.53509e-06
Pabpn1	41	0	0	974	0	0	3005	0	0
Krcc1	1144	0	0	11521	0	0	26734	0	0
Qdpr	11353	0	0	150531	0	0	218693	3	1.37176e-05
0610012G03Rik	36358	0	0	114337	0	0	216002	0	0
Arhgap5	606	0	0	3701	0	0	7676	2	0.000260451
Zfp36l2	79	0	0	14598	0	0	52889	0	0
Hif1a	4964	0	0	46399	0	0	76023	0	0
Chtf8	138	0	0	1649	0	0	3360	0	0
Dbndd2	305	0	0	20410	0	0	13332	0	0
Lypla1	901	0	0	6301	0	0	7880	0	0
Cpne1	0	0	0	5	0	0	41	0	0
Mrpl53	0	0	0	0	0	0	0	0	0
Med29	4104	0	0	21438	0	0	53649	0	0
Mrpl43	5171	0	0	38451	0	0	83717	0	0
Rab4b	246	0	0	6905	0	0	19221	0	0
Isca2	22637	0	0	72033	0	0	151604	0	0
Chmp1b	0	0	0	0	0	0	3	0	0
Hspa1a	154	0	0	51171	0	0	30746	0	0
Seh1l	2743	0	0	21488	0	0	37468	0	0
Mafb	484	0	0	4332	0	0	228112	0	0
Dohh	9	0	0	118	0	0	113	0	0
Zfp422	3075	0	0	46106	0	0	58539	0	0
Dcdc2b	3	0	0	23	0	0	864	0	0
Trappc5	4678	0	0	84735	0	0	140258	0	0
E030024N20Rik	0	0	0	0	0	0	0	0	0

## Sheet: FBGenesOnly
Gene	CM spliced	CM unspliced	ratio	EC spliced	EC unspliced	Ratio	FB spliced	FB unspliced	Ratio
Col6a3	35	101	0.737226	105	3271	0.968611	349445	383034	0.522928
Nfia	10653	10654	0.5	151669	191259	0.557722	1890345	1467540	0.437043
Lama2	7955	5416	0.405025	4414	1837	0.293826	1152660	824530	0.417021
Bicc1	1820	1458	0.444648	10171	11157	0.523091	1163819	764847	0.396568
Calu	9860	257	0.0254003	47692	29030	0.378374	258036	158476	0.380483
Errfi1	7571	1729	0.185894	34217	30442	0.470801	2594827	1573562	0.377499
Tbx20	9136	931	0.0924712	2252	11784	0.839496	937379	484941	0.34095
Gas7	99	262	0.723757	1346	2254	0.625937	84623	43582	0.339937
Eln	1458	229	0.135664	8739	7151	0.450003	792395	299034	0.273984
Sulf1	1460	32	0.0214334	13028	9450	0.420392	899956	280571	0.237666
Plxdc2	1672	1055	0.38673	2493	619	0.198844	861437	265646	0.235693
Pcsk6	1059	290	0.214815	2132	1563	0.42289	691239	188600	0.214357
Ugp2	22254	784	0.0340293	28688	15750	0.354418	630126	169595	0.212067
C7	671	59	0.0807114	5440	596	0.0987245	828409	207988	0.200684
Lamc1	4128	620	0.130554	95178	22720	0.192707	1255656	307863	0.196904
Col5a2	750	264	0.260099	3357	2025	0.376184	688270	159678	0.188311
Ltbp1	3477	1462	0.295951	33779	24045	0.415824	939255	208489	0.181651
Abi3bp	1304	158	0.107997	4990	756	0.131547	803088	177582	0.181082
Vcan	520	58	0.100173	2621	470	0.152005	431968	91016	0.174032
Col15a1	541	181	0.250346	25687	6951	0.212966	1046130	215276	0.170663
Abca8a	2255	1035	0.314494	5449	756	0.121818	1191623	239994	0.167638
Spon1	2271	189	0.076798	10316	3127	0.232594	1203454	231175	0.161139
Itgbl1	950	231	0.195431	1932	183	0.0864839	566079	103809	0.154964
Lhfp	7837	1598	0.169351	27204	3085	0.101849	4412138	754925	0.146103
Col8a1	3365	298	0.0813319	49079	6400	0.115357	1024881	166556	0.139794
Cp	14258	1155	0.0749319	20900	4863	0.188752	1507170	238362	0.136555
Fbn1	2828	559	0.164994	34130	18325	0.34934	1525557	238296	0.1351
Col5a1	538	153	0.221098	882	1328	0.600633	409056	62761	0.13302
Lpar1	1361	36	0.0257511	5095	1416	0.217445	1119589	156813	0.122855
Steap3	4160	147	0.0341226	9112	1488	0.140364	617583	86168	0.122441
Gpr153	377	90	0.192308	142	14	0.089172	110062	14826	0.118713
Gfpt2	2215	161	0.0677324	9179	1016	0.0996469	1627052	217469	0.1179
Gem	2572	408	0.136867	23569	4308	0.15453	1353992	173485	0.113576
Fstl1	6175	1107	0.151998	94215	13013	0.121357	4352147	493887	0.101916
Col14a1	391	142	0.265918	5536	961	0.147892	856355	96385	0.101166
Adamts2	3398	407	0.106936	14955	3019	0.167955	1655420	180060	0.0980996
Lama4	4757	841	0.150205	280554	86702	0.23608	1010131	108189	0.0967423
C1qtnf7	1019	9	0.00874636	1914	64	0.0323396	1001721	100354	0.0910591
Dpysl3	9101	247	0.0264199	130561	22433	0.146626	1532416	152601	0.0905634
Tnxb	1556	15	0.00954198	1707	614	0.264427	1095383	108213	0.089908
Lrp1	2036	106	0.0494634	2860	614	0.176691	1812064	175561	0.088327
Notch2	1578	1412	0.472083	10941	1857	0.145089	476150	46078	0.0882333
Uap1	5722	219	0.0368563	104731	10674	0.0924909	991703	95176	0.0875681
Fmo2	960	577	0.375163	310077	28187	0.0833282	1330295	119435	0.0823842
Svep1	579	210	0.265823	3548	585	0.141509	765292	67620	0.0811849
Nfix	5820	319	0.0519544	22294	3801	0.145655	762710	67285	0.0810667
Ddr2	2510	255	0.0921909	10013	244	0.0237863	1141999	96340	0.0777977
Scara5	857	90	0.0949367	363	49	0.118644	910818	76040	0.0770525
Adamtsl2	2139	205	0.08742	10313	752	0.0679559	1335322	110274	0.0762827
Gpm6b	1957	385	0.164319	6013	467	0.0720568	1619223	130322	0.074489
Colec12	2663	1097	0.291678	20197	6430	0.241475	814544	63563	0.0723863
Ptgis	1203	266	0.180952	4409	8215	0.650693	1604356	119732	0.0694465
Fgfr1	1969	154	0.0725047	18232	5396	0.228363	663066	48624	0.0683218
B4galt1	23307	1600	0.0642364	131156	20148	0.133161	1296536	94003	0.0676018
Sdc2	5340	119	0.0217949	9572	6987	0.42192	2373297	170834	0.0671482
Sgce	3339	211	0.0594199	102183	12526	0.109197	1143830	81684	0.0666528
Pdgfra	1195	14	0.0115702	9662	422	0.0418443	1397207	90790	0.0610149
Axl	6438	255	0.0380938	16350	106	0.00644103	2054257	128710	0.058961
Olfml1	631	2	0.00315457	2488	492	0.165045	634117	37837	0.0563088
Adamts5	1103	140	0.11254	20857	2002	0.0875766	1014076	59884	0.0557599
Enpp2	1737	19	0.0108139	37718	5166	0.120462	1616039	94605	0.0553037
Tmem45a	1058	0	0	543	58	0.0963455	1085297	62412	0.0543796
Pdlim3	9936	1094	0.0991751	25316	492	0.0190631	1373172	75241	0.0519472
Crispld2	3352	46	0.0135334	11391	577	0.0482079	3882943	212504	0.0518879
Mmp14	461	25	0.0513347	11021	576	0.0496637	878772	44487	0.0481847
Ccdc6	5364	281	0.0497697	93798	11489	0.10912	781213	39302	0.0478991
Cyp1b1	562	102	0.153383	814	20	0.0239521	216020	10768	0.0474803
Por	7011	335	0.0455968	159515	3482	0.0213622	1385789	66802	0.0459881
Aldh1a1	2603	103	0.0380495	4923	96	0.0191235	1537483	72767	0.0451898
Ifi205	269	0	0	185	9	0.0461538	447606	20967	0.0447464
Igf1	2240	12	0.00532623	18326	877	0.0456676	2533872	118287	0.0446003
Matn2	4479	32	0.0070922	3029	1023	0.252406	2206750	102827	0.044522
Sulf2	9000	340	0.0363987	8370	455	0.0515522	1502583	67663	0.0430907
Il33	1731	33	0.0186969	5315	320	0.0567779	627695	25488	0.0390212
Itih5	852	76	0.0818084	1105	47	0.0407632	660795	23878	0.034875
Maob	24733	368	0.0146602	6965	495	0.066345	873407	31408	0.034712
Cntfr	3528	18	0.00507471	3738	345	0.084476	496125	17585	0.0342313
Kdelr3	5703	0	0	7932	477	0.0567182	1242073	42064	0.0327566
Cbx5	12895	270	0.0205074	136273	13381	0.0894123	1149306	38461	0.0323809
Fhl1	23632	550	0.0227432	74034	6322	0.0786739	2629457	86102	0.0317069
Dpep1	6468	149	0.0225144	40546	1732	0.040966	12460891	397712	0.0309296
Ugdh	1403	93	0.0621242	37138	1707	0.0439427	815488	25423	0.0302327
Slc1a5	2802	0	0	23921	1522	0.0598176	1310639	40765	0.0301649
Loxl1	3162	275	0.0799884	4488	383	0.0786125	2877767	87169	0.0294
Efemp1	1314	0	0	525	401	0.432578	1036360	28042	0.0263453
Nid1	3077	52	0.0166134	264130	10935	0.0397541	2689697	69059	0.0250327
Itgb5	11017	224	0.0199253	83085	6193	0.0693668	2175972	54420	0.0243993
Pla1a	6	53	0.883333	1888	36	0.0187013	528634	13079	0.0241437
Fkbp9	21821	154	0.00700764	263068	17223	0.0614466	1639625	39509	0.0235294
Osr1	1392	156	0.10071	3963	459	0.103776	1289012	29655	0.0224886
Srpx2	672	0	0	348	6	0.0169014	532754	11639	0.0213797
Rbp1	3033	13	0.00426649	42192	2491	0.055747	2190871	47494	0.0212182
Pcolce2	5936	821	0.121486	11028	57	0.00514162	2832993	59600	0.0206043
Cfh	15380	247	0.015805	67050	2263	0.0326485	12536596	261451	0.020429
Ahsg	1336	197	0.128422	1869	588	0.239219	593827	12378	0.0204188
Cd55	660	0	0	30146	559	0.0182049	690659	14159	0.0200888
Bmp1	1995	329	0.141505	31516	1786	0.0536288	570629	11569	0.0198712
Nupr1	396	0	0	2167	11	0.00504819	526897	10370	0.0193014
Fam20c	2232	81	0.0350043	421	652	0.607076	506634	9928	0.0192193
Hmgcs2	2385	4	0.00167364	4244	706	0.142597	993708	19151	0.0189078
Igfbp7	28098	1467	0.0496178	3076969	108010	0.0339123	15458049	280983	0.0178526
Dpysl2	24366	403	0.0162697	1231310	52323	0.0407616	5460208	91852	0.0165438
Pmp22	9694	300	0.030015	161671	3281	0.0198905	5695221	93637	0.0161754
Mfap5	3872	19	0.00488181	6457	1938	0.230824	4915220	80462	0.0161063
Enc1	1443	0	0	56694	339	0.00594382	740925	12038	0.0159875
Pdgfrl	723	325	0.309819	2775	1468	0.3459	1607683	25737	0.0157565
Ms4a4d	2636	11	0.00415408	6246	16	0.00255469	1547920	23383	0.0148813
Slc43a3	8896	229	0.0250931	927491	28860	0.0301772	6182491	92484	0.0147385
Kdelr2	12254	0	0	233984	6384	0.0265592	1482306	21293	0.0141613
Htra3	8784	197	0.0219328	15332	11	0.000716893	8259389	118475	0.0141414
Lamb1	5211	42	0.00799391	209417	7953	0.0365872	1237888	17282	0.0137686
Igfbp3	9413	0	0	453709	3556	0.00777666	4518905	62049	0.013545
Dkk3	119916	721	0.00597656	3994	102	0.0248963	1534798	20997	0.013496
Bok	2959	10	0.003367	115354	3919	0.0328571	701031	9561	0.013455
Clec3b	1389	0	0	4485	4	0.000890869	2663780	36135	0.0133837
Mn1	5774	0	0	213114	4306	0.0198049	1896969	25344	0.0131841
Oaf	1744	34	0.0191119	4678	0	0	1327509	17213	0.0128004
Pgf	654	0	0	6265	763	0.10855	445935	5653	0.012518
Cd302	2275	10	0.00437445	46888	3868	0.0762062	1705274	19542	0.0113299
Lgals1	31855	73	0.00228632	28536	319	0.0110549	2458819	24894	0.0100229
Dpt	5516	1	0.000181225	25589	611	0.0233197	8586938	84312	0.00972316
Ccdc80	18837	366	0.0190585	160844	10416	0.0608195	27183039	265977	0.00968986
Inmt	2591	0	0	5402	20	0.003688	2869497	27745	0.00957635
Spry2	1075	6	0.00554529	27805	10	0.000359505	411077	3905	0.00941002
Igsf3	1731	165	0.0869794	4108	294	0.0667727	796274	7450	0.00926934
Olfml2b	2623	41	0.0153846	4273	97	0.0221917	1598523	14100	0.00874351
Spon2	2001	89	0.0425634	3721	17	0.00454667	2389252	20150	0.00836307
Smoc2	3004	207	0.0644458	11839	3136	0.209402	5854600	48580	0.00822946
Serpine2	11564	5	0.000432152	7191	71	0.00977557	2095218	17282	0.00818082
Col3a1	4897	7	0.00142712	19205	99	0.00512821	6602548	53587	0.00805077
Sdc4	11986	8	0.000666945	37077	26	0.000700733	1777184	14015	0.00782436
Fbln5	15906	820	0.0490225	325261	6919	0.020829	4424434	34139	0.00765693
Cygb	2046	0	0	9206	128	0.0137118	1686013	11943	0.00703375
Arap1	1747	15	0.00850822	18037	2581	0.125176	763133	5386	0.00700828
Gadd45g	7729	30	0.00386598	55533	647	0.0115163	537903	3648	0.0067362
Fkbp7	10080	0	0	54677	1238	0.0221404	972249	6428	0.00656804
Penk	200	0	0	789	0	0	658196	4219	0.00636911
Fbln2	12359	2	0.000161786	625524	5460	0.00865314	3585303	22572	0.00625631
Id2	3517	0	0	128601	1305	0.0100456	1440311	9031	0.0062311
Col1a2	4876	2	0.00040992	14743	35	0.00236823	4657382	29021	0.00619259
Mfap2	869	0	0	25908	16	0.000617165	1000548	5963	0.00592442
Ltbp4	14151	219	0.015239	908316	12083	0.013128	5622634	32884	0.0058145
Gstt1	17518	240	0.0135143	59962	73	0.00121594	1486054	8081	0.00540848
Hmgn1	10820	4	0.000369515	110236	1504	0.0134597	1247796	5851	0.00466718
Col6a2	1968	6	0.00303797	8407	20	0.00237304	3222684	13464	0.0041605
Timp2	13595	21	0.00154219	40109	314	0.00776766	4052901	16916	0.00415645
Igfbp4	16409	14	0.000852411	119227	424	0.00354361	11294200	46936	0.00413856
Sfrp1	5641	0	0	10077	17	0.001684	1739372	7187	0.00411495
S100a6	2915	1	0.000342818	68691	260	0.00377074	1858876	7644	0.00409532
Bambi	6512	1	0.000153516	87645	622	0.00704672	649659	2592	0.00397392
Ltbp3	2024	9	0.00442478	5853	2	0.00034153	468018	1833	0.00390123
Aebp1	451	0	0	7823	196	0.0244389	736920	2634	0.0035616
Prelp	269	0	0	3149	2	0.000634518	234600	781	0.00331801
Gstm2	49478	5	0.000101043	200808	1479	0.00731136	1677749	5469	0.00324913
Podn	33401	203	0.00604077	3465	9	0.00258993	1053300	3301	0.00312417
Dcn	111248	185	0.00166018	287369	40	0.000139174	96670567	294198	0.00303407
Pi16	1038	0	0	128526	2603	0.0198505	5461496	16491	0.00301041
Qpct	1570	0	0	7056	87	0.0121781	1490302	4298	0.00287568
Serping1	22889	14	0.000611247	69795	64	0.000916118	17722297	50085	0.00281814
Lrrn4cl	2	0	0	1881	0	0	234361	628	0.00267245
Htra1	25526	278	0.0107731	43979	123	0.00278893	1558258	4147	0.00265424
Pcolce	10633	8	0.000751738	44486	698	0.0154476	3008811	7959	0.00263825
Plekhf1	12054	21	0.00173899	20165	0	0	934671	2465	0.00263035
Mdk	923	0	0	2526	3	0.00118577	328976	849	0.00257408
Thbs2	825	20	0.0236407	2020	4	0.00197531	899861	2300	0.00254943
Mmp2	6677	6	0.000897666	28959	58	0.00199876	7447858	16905	0.00226464
Oat	65037	137	0.00210203	352385	2703	0.00761218	3013953	6699	0.00221773
Fbln1	60653	66	0.00108696	97383	122	0.00125121	23940636	52898	0.00220468
Islr	1191	88	0.06875	5526	310	0.0531095	4072190	8949	0.00219277
Srpx	2434	2	0.000820681	7396	10	0.00135007	2059101	4412	0.0021381
Txndc5	18830	4	0.000212371	131166	11702	0.0819072	2419712	5112	0.00210819
Mgst1	10077	0	0	58494	87	0.0014851	1912007	4031	0.00210382
Emilin1	2184	0	0	75858	93	0.00122446	1064246	2194	0.00205731
Prss23	3066	413	0.118678	15043	3	0.000199375	542283	1113	0.00204823
Col1a1	3229	69	0.0209154	13342	39	0.00291436	2906951	5829	0.00200118
Nbl1	1189	5	0.0041841	13061	22	0.00168144	738019	1468	0.00198516
Il11ra1	19892	101	0.00505152	76000	1080	0.0140112	2742803	5452	0.0019838
Slc39a1	2788	33	0.0116938	136161	225	0.00164972	698307	1234	0.00176401
Serpina3n	269	24	0.0816327	861	0	0	740299	1265	0.00170585
Cd34	3884	0	0	686070	4963	0.00718199	2468559	4217	0.00170537
Entpd2	409	0	0	1463	0	0	1225731	1976	0.0016095
Loxl2	38	0	0	750	57	0.0705446	100343	142	0.00141313
Gpx3	845696	1335	0.00157609	101060	1805	0.0175471	11574497	14180	0.00122361
Gsn	292278	421	0.00143833	710936	410	0.000576371	118826491	137259	0.00115379
Tmem119	999	0	0	8314	0	0	1809673	2065	0.00113979
Maged2	9827	0	0	41929	7	0.000166917	1803920	1959	0.00108479
Sfrp2	300	0	0	9275	4	0.000431034	1125705	1203	0.00106752
Olfml3	4945	0	0	7864	13	0.00165017	3719003	3703	0.000994706
Rarres2	3523	4	0.00113379	12566	53	0.00419968	2440714	2308	0.000944731
Cpxm1	1888	0	0	3791	448	0.10566	1830919	1664	0.000908007
Pdlim2	2691	6	0.00222387	21802	2	9.17221e-05	2101370	1765	0.000839223
Rcn3	6876	12	0.00174191	13962	0	0	2893120	2394	0.000826796
Ace	422	2	0.00470588	12928	70	0.00538503	327110	250	0.000763683
Itm2a	995	0	0	44414	3	6.75402e-05	1185367	900	0.000758682
Serpinf1	4982	0	0	22961	8	0.00034828	6042900	4464	0.000738173
Mgp	52802	194	0.00366058	174570	470	0.00268509	36457341	25896	0.000709805
Rnase4	5488	13	0.00236278	21535	2	9.28591e-05	3672806	2467	0.000671242
Sox9	641	0	0	986	0	0	465935	311	0.000667028
Ndrg2	259797	130	0.000500138	28072	6	0.000213683	3343232	2151	0.000642976
Gaa	28297	116	0.00408249	127073	11	8.65562e-05	1417668	825	0.000581603
Ces1d	62266	1006	0.0158994	5685	60	0.010442	627146	364	0.00058007
Gstm5	30865	0	0	11070	0	0	1232458	704	0.00057089
Sod3	6813	0	0	19953	0	0	5274789	2904	0.00055024
Igfbp6	830	0	0	12010	30	0.00249149	1719633	817	0.000474875
Gstm1	123772	46	0.00037151	1188418	1739	0.00146115	13395583	6320	0.000471575
C1ra	1892	0	0	5222	0	0	1904800	882	0.000462826
Col6a1	1902	0	0	8847	226	0.0249063	3302069	1442	0.000436505
C3	2895	0	0	1867	2	0.00106952	2863622	1198	0.000418176
Hspa5	143752	69	0.00047976	960395	638	0.000663868	7858607	2889	0.000367487
Lum	16441	0	0	48556	0	0	19932496	5682	0.000284981
Bgn	7077	0	0	41461	103	0.00247805	7939462	2225	0.000280167
Egr1	12685	56	0.00439491	703424	183	0.000260088	4543924	1203	0.000264679
Stbd1	6504	0	0	8225	0	0	782576	199	0.000254223
Mmp23	1102	0	0	3691	0	0	1762131	425	0.000241127
Mfap4	2876	0	0	36612	1	2.7312e-05	10866039	2458	0.000226158
Ecm1	8228	55	0.0066393	135853	826	0.00604331	6008675	1322	0.000219967
Mxra8	4772	0	0	62274	0	0	5078305	638	0.000125617
Apoe	61039	5	8.19068e-05	754840	171	0.000226486	41217771	4737	0.000114913
Cd63	33695	0	0	60294	2	3.31691e-05	4492233	223	4.96388e-05
Kazald1	2377	0	0	12840	1	7.78695e-05	415798	6	1.44298e-05
Tcf21	90	0	0	218	0	0	81010	1	1.23439e-05
Chpf	4217	0	0	4232	0	0	802757	8	9.96554e-06
Adm	3026	0	0	19967	0	0	256036	2	7.81131e-06
Hsd11b1	790	0	0	620	0	0	423991	2	4.71705e-06
Anxa1	2410	0	0	76697	0	0	2520137	3	1.19041e-06
Mt1	41466	0	0	14740	0	0	1937586	2	1.03221e-06
Cebpd	4375	0	0	196073	0	0	4663516	1	2.1443e-07
Ogn	3851	0	0	3718	0	0	1164601	0	0
Gas1	4376	0	0	8761	0	0	3117844	0	0
Fgl2	545	0	0	597	0	0	74349	0	0
Ecm2	306	0	0	32188	0	0	465504	0	0
Gpx8	1795	0	0	1560	0	0	149345	0	0
Lrrc17	242	0	0	381	0	0	124662	0	0
G0s2	1292	0	0	1409	0	0	135780	0	0
Junb	17043	0	0	510597	0	0	6577628	0	0
Msc	65	0	0	33	0	0	24289	0	0
Angpt2	8	0	0	53521	0	0	227776	0	0
Ndn	0	0	0	0	0	0	0	0	0
Ier2	8315	0	0	644617	0	0	3664220	0	0
Cxcl1	1232	0	0	16143	0	0	673855	0	0
Fibin	237	0	0	122	0	0	665019	0	0
Cd248	616	0	0	1232	0	0	719146	0	0

## Sheet: ECGenesOnly
Gene	CM spliced	CM unspliced	ratio	EC spliced	EC unspliced	Ratio	FB spliced	FB unspliced	Ratio
Lrrc8a	9	13	0.565217	483	2118	0.813989	499	5947	0.922445
Pkp4	10860	3410	0.238946	169117	337834	0.666402	16094	34246	0.68028
Rapgef1	7083	3451	0.327575	189062	375201	0.664939	63226	69672	0.524248
Gja1	4135	346	0.0771977	31699	52774	0.624737	9588	30763	0.762366
Plcb4	12285	4974	0.288181	400542	552861	0.579881	119855	128723	0.517835
Ablim3	2272	694	0.233906	255512	246515	0.491038	12213	8879	0.420945
Arhgap31	8504	2873	0.252505	294533	237774	0.446685	39206	24355	0.383169
Fli1	864	482	0.357832	450124	336033	0.427437	67826	33781	0.332464
Apbb2	9904	3181	0.243084	433104	291934	0.402646	123283	74366	0.376251
Pitpnc1	17998	7685	0.299214	633410	417507	0.397278	52035	49969	0.489868
Myo10	1300	668	0.339259	432875	269227	0.383458	31184	5314	0.145593
Tcf4	6922	4770	0.407936	1178099	715898	0.377982	1355411	453794	0.250825
Kank3	790	727	0.47892	244372	127389	0.342663	18283	3528	0.161746
Flt1	10366	3088	0.229506	1297501	637893	0.329593	6338	3243	0.338447
Kitl	1427	931	0.394659	596335	278943	0.31869	45502	10087	0.181453
Arhgap18	1702	196	0.103212	347360	160049	0.315423	42249	26833	0.388417
Ppm1h	282	204	0.418891	166293	67316	0.288155	30234	20123	0.399599
Rasgrp3	890	313	0.259967	348026	139362	0.285936	468	300	0.390117
Cdh13	64598	5372	0.0767747	861903	343634	0.285046	15461	4967	0.243135
Afap1l1	8618	397	0.0440328	309977	121746	0.282	1548	125	0.0746714
Eepd1	3061	740	0.194634	347516	123368	0.261992	51500	3930	0.070899
Lrrc8c	2980	887	0.229317	534728	176717	0.248391	136058	17934	0.11646
Arhgap29	2469	320	0.114695	287426	80423	0.21863	134868	19513	0.126394
Ptprb	7705	2815	0.26756	1132423	311099	0.215514	18408	5845	0.240991
Ctnnbip1	3389	59	0.0171064	232923	63282	0.213642	32925	10711	0.245457
Tek	3011	794	0.208618	376838	97436	0.205442	281647	67172	0.192569
Pik3c2b	2423	1518	0.385084	79002	18993	0.193814	19788	4445	0.18342
B4galt4	3905	375	0.0875964	276688	63749	0.187256	88198	5156	0.05523
Clic5	7265	567	0.0723861	284063	63313	0.18226	1775	47	0.0257817
Car8	1501	336	0.182807	459954	95256	0.171567	129754	17499	0.118835
Itga6	4091	627	0.132867	478697	95290	0.166014	7039	2486	0.26097
Abcg2	2339	451	0.161591	280919	50303	0.15187	76937	15836	0.170694
Hspa12b	1308	357	0.214286	473841	84638	0.151551	37219	5198	0.122542
Cmtm8	2074	866	0.294458	194152	30242	0.134771	244	18	0.0684411
Nrp1	12493	2325	0.156893	2451116	376289	0.133086	1065383	111477	0.094724
Fnbp1l	1531	23	0.014791	169215	25694	0.131825	24386	4837	0.165515
Palmd	10439	482	0.0441311	336409	50807	0.131211	3100	1098	0.261491
Lims2	14237	305	0.0209723	1836298	262076	0.124895	307662	18574	0.0569341
Pecam1	9429	750	0.0736739	1644991	225020	0.120331	54040	34972	0.392886
Col4a1	5993	613	0.0927804	637885	86244	0.1191	736973	152088	0.171066
Ets1	5538	198	0.0345128	980727	132432	0.118969	176303	26071	0.128825
Gimap6	6572	155	0.023038	1548014	204928	0.116905	10201	872	0.078743
Rnf125	3107	698	0.183395	264516	32049	0.108067	75859	5390	0.0663385
Trp53i11	2145	731	0.254084	433751	50590	0.104451	31896	1320	0.0397387
Mgll	13222	3031	0.186477	2826630	326273	0.103483	173698	7140	0.0394826
Col4a2	6858	1723	0.200769	1047492	111706	0.0963648	660428	68622	0.0941251
Epas1	14623	574	0.0377681	792601	84415	0.0962524	205864	22091	0.0969091
Srgn	2946	459	0.134762	841396	82142	0.0889426	22027	4015	0.154168
Rbp7	2764	152	0.0521083	335930	32265	0.08763	500	42	0.0773481
Snrk	5846	877	0.130428	1153811	110747	0.0875776	304867	18068	0.0559492
Ndrg1	485	5	0.0101833	129902	12325	0.0866566	39370	2821	0.066861
Unc45b	50084	226	0.00449206	227780	21263	0.0853785	8642	1025	0.10602
Itga1	5969	562	0.086038	737716	68667	0.0851542	99839	16898	0.144751
Ppp1r16b	319	22	0.0643275	356423	31091	0.0802317	1235	41	0.0321065
Slc28a2	2308	182	0.073063	524515	41421	0.0731901	762	17	0.0217949
Clec1a	893	19	0.0208105	351883	26214	0.0693312	208	21	0.0913043
Lmcd1	8656	98	0.0111936	333667	21830	0.0614068	95645	1095	0.0113189
Fmo1	3128	149	0.0454545	944677	60741	0.0604136	269188	8733	0.0314225
Emcn	4480	136	0.0294564	1750018	111685	0.0599907	1563	1414	0.474815
Gimap4	225	1	0.00440529	218550	13219	0.057035	147	3	0.0198675
Btnl9	1090	35	0.0310835	767150	45561	0.0560604	1641	137	0.0770096
Aqp7	4874	36	0.00733048	904873	53043	0.0553733	933	127	0.119698
2810025M15Rik	3103	0	0	154037	8811	0.0541053	24822	455	0.0179998
Tspan7	30495	1225	0.038618	1795359	100310	0.0529153	121914	4680	0.0369683
Apold1	4634	395	0.0785288	861815	48100	0.052862	27264	1907	0.0653709
Cd38	2647	7	0.00263653	481914	26455	0.0520389	16567	976	0.0556316
Cdh5	1565	868	0.356615	742518	38424	0.0492021	2535	392	0.13388
Anxa3	7508	17	0.00225884	806586	40169	0.0474387	637754	38466	0.0568838
Cdkn1a	19896	1162	0.0551783	1272201	61982	0.0464569	1344143	52729	0.0377479
Kdr	7942	92	0.0114499	2090366	98565	0.0450288	12053	174	0.0142296
Ehd2	9446	140	0.0146031	1701592	76974	0.0432787	1132189	89894	0.073558
S1pr1	11945	608	0.0484308	1604378	69347	0.0414327	33894	496	0.0144224
Slc26a10	2919	50	0.016835	620499	25593	0.0396119	2027	1938	0.488654
Cd36	212220	6097	0.0279272	12467252	504210	0.0388707	20956	1521	0.0676662
Rapgef3	278	611	0.686517	234749	9052	0.0371285	27825	2558	0.084189
Meox2	1278	4	0.00311769	388746	14947	0.0370256	33471	1234	0.0355558
Cxcl12	4574	214	0.0446857	1213079	46588	0.0369843	226177	1566	0.00687614
Tgm2	10846	30	0.00275811	302284	10391	0.0332325	107938	5149	0.0455309
Sh2d3c	1518	235	0.133979	657337	22204	0.0326749	64887	1066	0.0161628
Scarb1	6393	170	0.0258988	636826	20700	0.0314816	17065	493	0.0280768
Ushbp1	3643	38	0.0103205	892697	28739	0.0311893	1673	191	0.102413
Jam2	34822	803	0.0225397	1674170	52916	0.0306389	446218	10436	0.0228531
Myct1	2743	1843	0.401788	562278	16894	0.0291692	263	1	0.00377358
Eng	11639	660	0.0536585	3975960	119008	0.029062	1076029	18523	0.0169229
C1qtnf9	692	25	0.0348189	171687	5053	0.0285899	245	294	0.544444
Slc6a6	7816	141	0.017718	1143555	33585	0.028531	77929	3565	0.043745
Actn4	10764	883	0.075807	1071556	31238	0.0283262	760456	17787	0.0228553
Tspan13	11602	558	0.0458844	3170187	90179	0.0276592	6663	29	0.00433289
Mmrn2	5584	35	0.00622776	893923	25022	0.027229	2140	651	0.233166
Ets2	3920	211	0.0510649	441589	12275	0.0270455	66911	8227	0.10949
Ehd1	6494	187	0.0279856	576953	15609	0.0263415	314759	10197	0.0313795
Tie1	2878	35	0.012011	1008808	27189	0.0262443	1777	22	0.0122222
Podxl	2433	0	0	502994	13525	0.0261849	1102	36	0.0316067
F11r	8802	9	0.00102133	1020206	26068	0.0249151	19357	1068	0.0522863
Arglu1	5935	58	0.00967634	295756	6946	0.0229466	415503	3278	0.00782746
Robo4	1596	2	0.00125078	463430	10815	0.0228046	983	28	0.027668
Cd300lg	5139	221	0.0412237	2122373	49215	0.0226631	16240	4348	0.211181
Sox17	2068	6	0.00289157	416616	9319	0.0218789	1479	0	0
Klf2	3723	137	0.035483	510133	10987	0.0210834	300338	3570	0.0117469
Rasip1	1816	92	0.0481928	401324	8444	0.0206067	263	215	0.448852
Cd200	4551	76	0.0164218	1341290	27384	0.0200077	345595	4549	0.0129918
Egfl7	3201	0	0	560764	11369	0.0198712	1518	2	0.00131492
Ctnnb1	6981	28	0.00399429	380490	7661	0.0197371	301697	3029	0.00994004
Tsc22d1	108387	616	0.00565117	1727868	33250	0.01888	1008460	49140	0.0464636
Cdc42ep1	5726	82	0.014116	548300	10184	0.018235	438650	6566	0.0147479
Grap	1790	0	0	413607	7544	0.0179128	76704	11413	0.12952
Sgk1	6549	157	0.0234084	2234240	36895	0.0162452	422177	1364	0.00322046
Thrsp	5879	1	0.000170039	435463	6823	0.0154266	5851	1	0.000170853
Esam	9937	19	0.00190821	2974863	43857	0.0145283	20815	431	0.0202852
Ly6c1	8509	249	0.0284279	2555090	35039	0.0135279	71329	1122	0.0154861
Tm4sf1	10084	220	0.0213489	2820632	37707	0.0131919	1602684	23125	0.0142237
Car4	1864	0	0	946417	12108	0.0126319	4782	1	0.00020903
Rsad2	484	77	0.137011	489223	6178	0.0124707	36723	621	0.0166287
Tpm4	2506	31	0.0122143	553035	6956	0.0124216	581669	6056	0.0103041
Acly	2513	51	0.019883	386928	4855	0.012392	208453	2911	0.0137724
Alpl	7597	210	0.0268955	463940	5745	0.0122316	152918	6715	0.042065
Tnfaip1	10691	87	0.00807125	892495	10570	0.0117046	354130	3876	0.0108266
Tcf15	2228	10	0.00446628	672744	7850	0.011534	1722	0	0
Gngt2	725	0	0	194416	2229	0.0113351	9115	1	0.000109685
Slc9a3r2	13857	1	7.21553e-05	2415441	25725	0.010538	391685	1225	0.00311775
Nes	656	0	0	293838	3107	0.0104632	44199	0	0
Aqp1	9288	70	0.00747943	3320366	27898	0.00833208	31876	165	0.00514949
Hspb1	108896	243	0.0022265	1028974	7916	0.00763436	906113	7462	0.0081679
AW112010	2576	60	0.0227531	809450	6177	0.00757331	200065	7446	0.0358823
Dll4	1323	4	0.00301205	343232	2574	0.00744346	280	0	0
Adcy4	4508	27	0.00595238	421787	2935	0.00691039	40112	708	0.017344
Plod1	19933	143	0.00712258	788082	5321	0.00670655	554230	3172	0.00569068
Efna1	5117	16	0.00311648	401519	2569	0.00635751	106628	31	0.000290643
Sult1a1	5633	0	0	516438	3294	0.00633787	159141	894	0.00558624
Sparcl1	24780	132	0.00529844	4255287	26729	0.00624215	5205578	12567	0.00240833
Dok4	263	138	0.343284	99162	600	0.00601425	12147	99	0.00808361
Jup	31620	276	0.00865285	1216438	7306	0.0059702	602067	5671	0.00933131
Tinagl1	8109	4	0.000492975	1551042	9192	0.00589142	8607	23	0.00266481
Gpr4	2385	64	0.0261224	288848	1695	0.00583388	999	93	0.0850869
Dusp6	4534	134	0.0286999	531442	2808	0.00525596	102451	338	0.00328826
Cdkn1c	3389	39	0.0113736	355317	1711	0.00479233	215271	1941	0.00893593
S100a16	9903	0	0	807967	3798	0.00467869	1171639	1961	0.00167093
Bst2	2648	110	0.0398695	621514	2874	0.0046029	454412	1647	0.00361137
Gng11	5371	0	0	906690	3947	0.00433432	337035	2318	0.00683063
Bcam	17711	29	0.00163463	668497	2805	0.00417844	70275	1215	0.0169951
Icam2	5230	55	0.0104048	1106051	4433	0.00399195	1766	6	0.00338409
Dusp3	10837	0	0	957960	2992	0.00311358	487595	469	0.000960938
Plk2	2106	1	0.000474383	379706	1006	0.00264241	23707	27	0.00113756
Ly6e	8519	11	0.00128942	2845956	7265	0.00254624	1501083	2006	0.00133458
Ly6a	31588	27	0.000853998	5712032	14230	0.00248504	2422920	462	0.000190643
Cyp4b1	7221	15	0.00207268	1733586	3863	0.00222337	29592	42	0.00141724
Gbp7	915	9	0.00972973	434554	758	0.00174128	217400	1035	0.00473823
Calm1	53250	16	0.000300374	2661860	4484	0.0016817	2080403	1748	0.000839516
Gpihbp1	9504	18	0.00189016	2006519	2811	0.00139897	2724	0	0
Pim3	10141	20	0.00196812	522434	713	0.0013629	244872	312	0.00127251
Tmem88	4677	0	0	1403586	1150	0.000818659	3363	35	0.0102971
Adam15	5249	20	0.00379507	714458	381	0.000532986	374864	212	0.000565217
Tmsb4x	35524	0	0	5778339	2292	0.000396496	3485272	2297	0.000658625
Cd93	5416	43	0.00787546	1418084	474	0.000334142	4045	0	0
Sox18	3837	0	0	1482201	226	0.000152453	3125	0	0
Slfn5	2222	0	0	425883	15	3.52196e-05	153547	31	0.000201851
Ccdc85b	3851	0	0	315486	8	2.5357e-05	154837	0	0
Itpripl1	2281	0	0	468579	7	1.49385e-05	190632	0	0
B2m	8429	0	0	1782203	18	1.00998e-05	1829538	32	1.74904e-05
Cav1	2874	0	0	230039	1	4.34705e-06	9999	0	0
Ecscr	1073	0	0	370283	1	2.70062e-06	3104	0	0
Malat1	143442	0	0	3936917	5	1.27003e-06	8707633	20	2.29683e-06
Cldn5	11087	0	0	2056548	0	0	1377	0	0
Fabp4	35064	0	0	10778816	0	0	53831	0	0
Cav2	1092	0	0	133295	0	0	5324	0	0
Aplnr	605	0	0	218964	0	0	52	0	0
Ceacam1	1269	0	0	159410	0	0	399	0	0
Pde2a	14	0	0	24	0	0	0	0	0
Timp4	1833	0	0	517625	0	0	1211	0	0
Tmem204	746	0	0	193351	0	0	93678	0	0
Id1	3146	0	0	932555	0	0	447847	0	0
Gimap1	94	0	0	15127	0	0	10	0	0
Clec14a	2119	0	0	626175	0	0	156187	0	0
Lipe	917	0	0	127167	0	0	35332	0	0
Thbd	6501	0	0	675425	0	0	379459	0	0
Ctla2a	573	0	0	138415	0	0	3248	0	0
Tgtp2	85	0	0	15312	0	0	1319	0	0
Myl12b	1052	0	0	121695	0	0	174093	0	0
Il2rg	150	0	0	45707	0	0	106	0	0

## Sheet: CMGenesOnly
Gene	CM SUM	CM spliced	CM unspliced	ratio	EC spliced	EC unspliced	Ratio	FB spliced	FB unspliced	Ratio
Fgf12	29605	36084	0.549307	1214	533	0.30492	5902	14603	0.712133
Ryr2	138810	65884	0.321864	4360	986	0.184402	2638	5873	0.689967
Trdn	58602	17403	0.228969	4834	908	0.158106	3415	3180	0.48211
Ccdc141	24407	5957	0.19618	2652	144	0.0514837	6679	9064	0.575711
Syngr1	20856	4195	0.167452	1526	128	0.0773414	1148	37	0.0311973
Myocd	29419	5403	0.155156	130	69	0.345	4048	878	0.178202
Corin	31172	5130	0.141311	66	532	0.888147	529	331	0.384437
Nexn	46567	5932	0.11299	7023	957	0.11991	41843	14508	0.257453
Myom1	63807	7224	0.101701	4524	552	0.108726	2289	327	0.124952
Pdk4	38789	3918	0.0917392	10628	618	0.054948	76836	1622	0.0206732
Acss1	47406	3262	0.0643786	21640	9448	0.303902	2531	991	0.281294
Dhrs7c	27321	1775	0.0610028	4866	1124	0.187615	2793	3	0.00107258
Ppp1r14c	27721	1798	0.0609079	3726	671	0.152569	2232	99	0.0424528
Rcan2	89492	5151	0.054425	8412	1280	0.132054	29639	12290	0.293108
Ppp1r3a	35501	1887	0.0504694	1143	23	0.0197087	1217	101	0.0765732
Fhl2	163638	8237	0.0479241	30090	864	0.0279115	36760	1596	0.0416091
Ttn	1485718	67566	0.0434988	10081	1098	0.0982111	11921	203	0.0167423
Obscn	146117	5706	0.037583	48357	1290	0.0259829	11944	346	0.0281507
Asb11	44207	1574	0.0343803	556	4	0.00713012	893	8	0.00886918
Myom2	86199	3058	0.0342602	8020	1104	0.120986	2492	4	0.00160192
Grb14	45503	1614	0.0342544	7072	53	0.00743755	76221	10216	0.118189
Nrap	23222	790	0.0328989	773	369	0.322835	566	44	0.0720131
Ldb3	120243	3913	0.0315165	5698	102	0.0175832	7947	3754	0.3208
Lrrc2	22239	706	0.0307679	1995	427	0.176228	2693	106	0.0378571
Lmod2	23122	698	0.0293019	2219	1291	0.367702	3622	694	0.16076
Myzap	56483	1585	0.0272951	106663	27592	0.205518	11563	1084	0.0857052
Cmya5	91787	2561	0.0271439	1869	657	0.259992	4714	1589	0.252062
Smpx	153824	4261	0.0269537	11671	16	0.00136893	13643	72	0.00524934
Asb2	79073	2183	0.0268654	361	11	0.0294906	123446	6374	0.0490984
Mylk3	156867	4243	0.0263359	23692	190	0.00795545	20078	137	0.00677681
Fsd2	41441	1050	0.0247105	1876	3	0.00159574	1097	202	0.155385
Txlnb	65990	1640	0.0242492	10678	1108	0.0940019	7659	11	0.00143397
Trim54	38104	935	0.0239498	4090	2	0.00048864	8305	10	0.0012025
Gmpr	43086	1022	0.0231699	69032	2496	0.0348949	8565	41	0.00476356
Sgca	32297	761	0.0230195	3721	2	0.00053706	16	132	0.885906
Tnnt2	1476702	34226	0.0226523	132397	44	0.00033222	125929	262	0.0020762
Sgcg	29516	679	0.0224864	899	3	0.00332226	1451	51	0.0339321
Art1	27227	543	0.0195528	1053	0	0	952	0	0
Sbk2	16907	325	0.0188592	585	584	0.499145	304	1743	0.851074
Kcnk3	51874	990	0.0187269	2592	93	0.034624	5742	76	0.0130607
Actn2	307164	5518	0.0176473	25070	115	0.00456603	10685	7	0.00065463
Adprhl1	100266	1655	0.0162379	15065	1	6.64e-05	8708	7	0.00080312
Myl1	196353	3209	0.0160801	19411	119	0.00609288	12254	278	0.0221814
Smyd1	42212	666	0.0155321	913	4298	0.824635	1847	1655	0.472452
Mlf1	63031	927	0.0144937	8338	766	0.0841296	5394	440	0.075407
Apobec2	39504	576	0.0143709	4380	87	0.0194718	2823	846	0.230518
Myoz2	156478	2258	0.0142248	22430	14	0.00062375	14777	329	0.021778
Xirp2	21966	286	0.0128522	959	71	0.0688652	1377	34	0.0240793
Mtus2	71722	841	0.0115898	7540	892	0.105775	10948	5153	0.320022
Tmod1	77395	865	0.0110528	4302	3934	0.477601	7437	3256	0.30447
Itgb1bp2	42217	458	0.010732	5382	106	0.0193114	3647	0	0
Nppb	90736	968	0.0105556	4989	0	0	3087	0	0
Mybphl	368605	3736	0.0100338	22422	124	0.00549962	20414	58	0.002833
Fam174b	27457	272	0.00980887	9293	1209	0.11511	23302	10	0.00042895
Myh6	2030484	18847	0.00919666	44390	2	4.51e-05	53626	9	0.0001678
Cox7a1	86705	781	0.00892704	11241	139	0.0122133	14749	262	0.0174527
Casq2	194843	1553	0.00790745	4306	54	0.0123825	5970	12	0.00200568
Lrrc39	25358	191	0.00747554	3827	2144	0.359009	2944	3260	0.525383
Plin5	28991	202	0.00691923	2	0	0	21	1	0.0434783
Vegfb	25156	168	0.00663376	8429	485	0.0544027	60832	344	0.00562303
Ckmt2	596240	3481	0.00580436	8622	1116	0.114591	12049	16	0.00132604
Pfkm	121668	696	0.0056879	30014	1165	0.0373637	83279	3017	0.0349607
Ankrd1	202593	1148	0.00563458	13785	66	0.00476465	16301	366	0.0219582
Rrad	121891	626	0.00510945	18496	3	0.00016216	145765	83	0.00056908
Hhatl	44192	224	0.00504311	6	0	0	1081	0	0
Csrp3	696761	3298	0.00471102	43735	38	0.0008681	26934	3	0.00011137
Srl	93606	440	0.00467851	4110	580	0.123641	2527	3242	0.561872
Myl4	560493	2634	0.00467744	37363	624	0.0164262	53191	2045	0.0370223
Fabp3	469853	1558	0.00330496	31282	7	0.00022371	20121	2	9.94e-05
Dsp	71221	234	0.00327474	1090	52	0.0454943	7069	469	0.0622098
Mpi	31413	95	0.00301501	21442	232	0.0107036	47731	898	0.018466
Ephx2	42531	124	0.00290698	4232	47	0.0109813	42364	1135	0.0260919
Tmem38a	56823	155	0.0027203	6345	1550	0.196302	89455	8519	0.0869507
Sln	848506	2227	0.00261774	61029	2	3.28e-05	69600	0	0
Hrc	18801	49	0.00259933	915	0	0	1244	0	0
Dgat2	50709	120	0.00236081	1368	71	0.0493056	12620	4552	0.265067
Popdc2	86327	196	0.00226527	3044	118	0.0373064	65695	1490	0.0221772
Myl7	2037354	4447	0.00217798	123468	642	0.00517279	176378	609	0.00344091
Fndc5	79992	150	0.00187165	9665	30	0.00309406	80611	167	0.00206737
Mybpc3	222828	414	0.00185448	9427	1	0.00010606	9477	18	0.00189553
Fbxl22	38309	68	0.00177185	5884	0	0	11184	666	0.0561978
Pgam2	306412	350	0.00114095	26768	354	0.0130516	20491	383	0.0183473
Pygm	137513	130	0.00094447	124417	5150	0.0397475	99179	6498	0.0614887
Pln	23084	21	0.00090885	1682	2	0.00118694	1261	0	0
Myl3	473762	421	0.00088784	47014	184	0.00389839	25100	0	0
Mb	543568	432	0.00079412	51736	90	0.00173655	40459	226	0.00555474
Tnni3	2000941	1377	0.0006877	137968	3	2.17e-05	104438	1	9.57e-06
Stard10	26843	17	0.00063289	2609	45	0.0169491	13007	420	0.0312779
Tuba8	38285	18	0.00046992	4210	5	0.00118596	557	0	0
Tcap	316693	147	0.00046396	22384	4	0.00017866	22382	0	0
Gpc1	32763	14	0.00042712	142	0	0	18498	1	5.41e-05
Ptgds	29337	12	0.00040886	5083	1	0.00019666	3203	2	0.00062383
Doc2g	81771	25	0.00030563	10224	0	0	7969	85	0.0105524
Ckm	250986	70	0.00027882	36720	7	0.00019059	16438	121	0.00730676
Eno3	294937	72	0.00024406	48125	3	6.23e-05	37960	53	0.00139422
Hspb8	36780	8	0.00021746	923	0	0	96657	170	0.00175569
Hspb7	90661	13	0.00014337	14651	2	0.00013648	43427	0	0
Cox8b	51741	5	9.66e-05	6292	1	0.00015888	6626	0	0
Hspb6	192321	18	9.36e-05	27837	75	0.00268692	27231	71	0.00260045
Des	183017	15	8.2e-05	45496	0	0	57400	15	0.00026125
Tuba4a	110270	7	6.35e-05	60722	38	0.0006254	24446	4	0.00016359
Nppa	3976257	108	2.72e-05	151692	0	0	168476	16	9.5e-05
Chchd10	229885	2	8.7e-06	17934	0	0	15404	0	0
Tnnc1	174946	0	0	19669	28	0.00142146	9937	0	0
C130080G10Rik	5749	0	0	575	0	0	860	0	0
Cox6a2	163709	0	0	9247	0	0	6154	0	0
Actc1	1052988	0	0	92049	0	0	77528	0	0
Nudt8	1	0	0	0	0	0	1	0	0
Ppif	16404	0	0	4258	0	0	13493	2	0.00014819
Ankrd23	3111	0	0	505	0	0	604	0	0
Hspb2	14944	0	0	1247	0	0	27378	57	0.00207756
