# Supplementary material for: Cardiac endothelial cells maintain open chromatin and expression of cardiomyocyte myofibrillar genes
Source: eLife journal article supplement (doi:10.7554/elife.55730), 2020-12-14
Supplement: supp [file elife-55730-supp-v1.zip › elife_poa_e55730_Supplementary_file_3.xlsx]

## Sheet: All Annotated
PeakID (cmd=annotatePeaks.pl DBA_OverallMaleNegvsPos_ForAnnotation.txt mm10)	Chr	Start	End	Strand	Fold	Conc_Neg	Conc_Pos	FDR	Annotation	Detailed Annotation	Distance to TSS	Nearest PromoterID	Entrez ID	Nearest Unigene	Nearest Refseq	Nearest Ensembl	Gene Name	Gene Alias	Gene Description	Gene Type
1	chr5	146324723	146325605	+	3.88	10.19	6.31	1.78e-26	Intergenic	Intergenic	-59842	NM_145155	245880	Mm.472750	NM_145155	ENSMUSG00000029636	Wasf3	Scar3|Wave3	WAS protein family, member 3	protein-coding
2	chr9	24896361	24897408	+	3.78	9.59	5.81	2.56e-20	Intergenic	Intergenic	-77324	NR_153861	102631612	Mm.410759	NR_153861		E130101E03Rik	-	RIKEN cDNA E130101E03 gene	ncRNA			Total Peaks	Pos Only	Neg Only	Shared
3	chr15	67110211	67111047	+	3.57	9.68	6.11	5.38e-20	intron (NM_009177, intron 6 of 8)	intron (NM_009177, intron 6 of 8)	66253	NM_009177	20442	Mm.248334	NM_009177	ENSMUSG00000013846	St3gal1	5330418N22Rik|AI467004|ST3GalI|Siat4|Siat4a|St3gal-1	ST3 beta-galactoside alpha-2,3-sialyltransferase 1	protein-coding		All	86649	2860	9171	66885
4	chr5	93282327	93283809	+	3.2	9.89	6.69	2.82e-18	Intergenic	Intergenic	15495	NM_007635	12452	Mm.3527	NM_007635	ENSMUSG00000029385	Ccng2	-	cyclin G2	protein-coding		TSS	8371	70	180	7832
5	chr4	123227558	123229775	+	3.07	10.62	7.55	4.5e-18	Intergenic	Intergenic	-4890	NM_013905	56198	Mm.103615	NM_013905	ENSMUSG00000032744	Heyl	Hey3|Hrt3|bHLHb33|hesr3	hairy/enhancer-of-split related with YRPW motif-like	protein-coding		Intergenic	31141	1433
6	chr10	111689528	111690096	+	4.32	9.47	5.15	5.14e-18	Intergenic	Intergenic	-95539	NR_045344	71321	Mm.410785	NR_045344	ENSMUSG00000097082	4933440J02Rik	-	RIKEN cDNA 4933440J02 gene	ncRNA		Intron	39793	1241
7	chr4	105456997	105457680	+	3.36	9.37	6	5.77e-18	Intergenic	Intergenic	299991	NM_080555	67916	Mm.348326	NM_080555	ENSMUSG00000028517	Plpp3	1110003O22Rik|2610002D05Rik|AV025606|D4Bwg0538e|D4Bwg1535e|Lpp3|Ppab2b|Ppap2b	phospholipid phosphatase 3	protein-coding
8	chr1	164798201	164799212	+	3.44	9.82	6.38	2.81e-17	intron (NM_019759, intron 1 of 3)	intron (NM_019759, intron 1 of 3)	2043	NM_019759	56429	Mm.28935	NM_019759	ENSMUSG00000026574	Dpt	1810032B19Rik|5033416F05Rik|EQ-1|Eq1	dermatopontin	protein-coding
9	chr17	78521187	78522017	+	3.61	8.99	5.38	1.93e-16	intron (NM_001197028, intron 1 of 12)	intron (NM_001197028, intron 1 of 12)	13539	NM_001197028	74199	Mm.292983	NM_028813	ENSMUSG00000024076	Vit	1700052E02Rik|1700110E08Rik|2810429K11Rik|AKH|akhirin	vitrin	protein-coding
10	chr4	9440527	9441547	+	3.5	9.86	6.36	1.93e-16	intron (NM_001355183, intron 5 of 5)	RMER1B|Other|Other	171720	NM_028940	74438	Mm.473368	NM_028940	ENSMUSG00000041216	Clvs1	4933402J24Rik|Clvl1|Rlbp1l1	clavesin 1	protein-coding
11	chr12	70597955	70598852	+	3.25	9.27	6.02	1.93e-16	intron (NR_037248, intron 4 of 4)	intron (NR_037248, intron 4 of 4)	145249	NM_028339	72736	Mm.204670	NM_028339	ENSMUSG00000021072	Tmx1	2810425A04Rik|AI465319|Txndc1	thioredoxin-related transmembrane protein 1	protein-coding
12	chr9	62559977	62560545	+	3.2	9.34	6.14	2.17e-16	Intergenic	Intergenic	-23217	NM_175484	235431	Mm.335229	NM_175484	ENSMUSG00000041729	Coro2b	CLIPINC|E130012P22Rik	coronin, actin binding protein, 2B	protein-coding
13	chr16	86242690	86243754	+	3.33	9.46	6.13	2.24e-16	Intergenic	Intergenic	-342097	NM_011782	23794	Mm.112933	NM_011782	ENSMUSG00000022894	Adamts5	9530092O11Rik|ADAM-TS5|ADAMTS1|ADAMTS11|ADMP-2|AI481094|ASMP-2	a disintegrin-like and metallopeptidase (reprolysin type) with thrombospondin type 1 motif, 5 (aggrecanase-2)	protein-coding
14	chr14	33680366	33681256	+	3.3	9.31	6.01	8.19e-16	Intergenic	Intergenic	91541	NM_008978	19256	Mm.8019	NM_008978	ENSMUSG00000021940	Ptpn20	typ	protein tyrosine phosphatase, non-receptor type 20	protein-coding
15	chr13	60015462	60016585	+	2.91	9.9	6.99	8.19e-16	Intergenic	Intergenic	-13688	NR_046142	328263	Mm.123405	NR_046142	ENSMUSG00000114531	A530065N20Rik	A530065N20	RIKEN cDNA A530046M15 gene	ncRNA
16	chr2	21164187	21164774	+	3.67	9.23	5.56	3.01e-15	Intergenic	Intergenic	40885	NM_027728	71233	Mm.27658	NM_027728	ENSMUSG00000026679	Enkur	4933434I06Rik|AU016229	enkurin, TRPC channel interacting protein	protein-coding
17	chr7	145299227	145301551	+	2.82	10.13	7.3	3.71e-15	promoter-TSS (NM_145379)	promoter-TSS (NM_145379)	-520	NM_145379	211577	Mm.215151	NM_145379	ENSMUSG00000031070	Mrgprf	BC019711|Mgrc|MrgF	MAS-related GPR, member F	protein-coding
18	chr2	110085269	110086271	+	3.44	9.29	5.85	3.81e-15	Intergenic	Intergenic	-35291	NR_040508	75517	Mm.363927	NR_040508	ENSMUSG00000086186	Ccdc34os	1700024P03Rik	coiled-coil domain containing 34, opposite strand	ncRNA
19	chr13	97662682	97663342	+	3.45	8.88	5.43	6.83e-15	Intergenic	Intergenic	84399	NR_152141	403201	Mm.110162	NR_152140		5330416C01Rik	Gm532	RIKEN cDNA 5330416C01 gene	ncRNA
20	chr16	29816590	29817671	+	3.29	9.69	6.4	6.92e-15	Intergenic	L2a|LINE|L2	161994	NR_037689	328657	Mm.425982	NM_001033403		Gm1968	-	predicted gene 1968	ncRNA
21	chr16	45070144	45070946	+	3.55	9.25	5.71	8.64e-15	Intergenic	Intergenic	-23466	NM_026439	67896	Mm.181074	NM_026439	ENSMUSG00000022665	Ccdc80	2610001E17Rik|DRO1|Ssg1|Urb	coiled-coil domain containing 80	protein-coding
22	chr11	56762604	56763392	+	3.31	9.06	5.75	8.64e-15	Intergenic	Intergenic	-248620	NM_008165	14799	Mm.4920	NM_008165	ENSMUSG00000020524	Gria1	2900051M01Rik|Glr-1|Glr1|GluA1|GluR-A|GluRA|Glur-1|Glur1|HIPA1|gluR-K1	glutamate receptor, ionotropic, AMPA1 (alpha 1)	protein-coding
23	chr4	47178099	47179785	+	2.92	9.85	6.93	9.29e-15	Intergenic	Intergenic	-29070	NM_009928	12819	Mm.233547	NM_009928	ENSMUSG00000028339	Col15a1	-	collagen, type XV, alpha 1	protein-coding
24	chr19	27336206	27337091	+	3.34	9	5.66	1.03e-14	3' UTR (NM_183179, exon 2 of 2)	3' UTR (NM_183179, exon 2 of 2)	14029	NM_183179	240595	Mm.269759	NM_183179	ENSMUSG00000047298	Kcnv2	KV11.1	potassium channel, subfamily V, member 2	protein-coding
25	chr4	9444204	9444842	+	3.25	9.32	6.07	1.09e-14	intron (NM_001355183, intron 5 of 5)	intron (NM_001355183, intron 5 of 5)	175206	NM_028940	74438	Mm.473368	NM_028940	ENSMUSG00000041216	Clvs1	4933402J24Rik|Clvl1|Rlbp1l1	clavesin 1	protein-coding
26	chr1	80018450	80019182	+	3.4	9.32	5.92	1.22e-14	Intergenic	Intergenic	-160151	NM_009255	20720	Mm.3093	NM_009255	ENSMUSG00000026249	Serpine2	B230326M24Rik|PAI-1|PI-7|PI7|PN-1|Spi4	serine (or cysteine) peptidase inhibitor, clade E, member 2	protein-coding
27	chr2	27798812	27799582	+	3.25	9.43	6.17	1.22e-14	Intergenic	Intergenic	-87228	NM_015734	12831	Mm.7281	NM_015734	ENSMUSG00000026837	Col5a1	AI413331	collagen, type V, alpha 1	protein-coding
28	chr9	44737046	44738037	+	3.21	10.09	6.88	1.64e-14	Intergenic	Intergenic	-2343	NM_153537	102693	Mm.28639	NM_153537	ENSMUSG00000048537	Phldb1	AU041016|D330037A14Rik|Ll5a	pleckstrin homology like domain, family B, member 1	protein-coding
29	chr10	67776816	67777606	+	3.99	8.47	4.48	2.82e-14	Intergenic	Intergenic	135451	NM_178679	216049	Mm.268346	NM_178679	ENSMUSG00000037855	Zfp365	AI839779|AV340892|DBZ|Su48|Znf365|talanin	zinc finger protein 365	protein-coding
30	chr2	75356670	75357767	+	3.11	9.11	6	2.82e-14	Intergenic	Intergenic	86961	NR_040635	77269	Mm.389278	NR_040635		9430019J16Rik	-	RIKEN cDNA 9430019J16 gene	ncRNA
31	chr19	17498396	17499248	+	3.25	9.26	6	4.04e-14	intron (NM_001190483, intron 24 of 37)	intron (NM_001190483, intron 24 of 37)	104779	NM_019437	54391	Mm.7013	NM_019437	ENSMUSG00000024712	Rfk	0610038L10Rik|AF031381|KOI-4	riboflavin kinase	protein-coding
32	chr10	67755855	67756535	+	3.44	8.73	5.29	7.98e-14	Intergenic	Intergenic	156467	NM_178679	216049	Mm.268346	NM_178679	ENSMUSG00000037855	Zfp365	AI839779|AV340892|DBZ|Su48|Znf365|talanin	zinc finger protein 365	protein-coding
33	chr5	35624566	35625727	+	3.17	9.54	6.37	8.58e-14	Intergenic	Intergenic	-36383	NR_045807	74364	Mm.473123	NM_175208	ENSMUSG00000055061	4931431C16Rik	-	RIKEN cDNA 4931431C16 gene	ncRNA
34	chr11	82171350	82172094	+	3.13	9.28	6.15	1.35e-13	Intergenic	Intergenic	8090	NM_011329	20290	Mm.1283	NM_011329	ENSMUSG00000020702	Ccl1	BF534335|I-309|P500|Scya1|Tca-3|Tca3	chemokine (C-C motif) ligand 1	protein-coding
35	chr2	84025092	84025652	+	3.51	8.88	5.37	1.74e-13	Intergenic	Intergenic	-84146	NM_027964	71861	Mm.116957	NM_027964	ENSMUSG00000034552	Zswim2	1700025P14Rik|4933437F18Rik|MEX	zinc finger SWIM-type containing 2	protein-coding
36	chr6	140193275	140194044	+	3.2	8.94	5.73	1.74e-13	Intergenic	Intergenic	152134	NM_007605	12344	Mm.12817	NM_007605	ENSMUSG00000041791	Capza3	510-4|Cappa3|Gsg3|Tex8|repro32	capping protein (actin filament) muscle Z-line, alpha 3	protein-coding
37	chr9	67584462	67585526	+	3.04	9.61	6.57	1.74e-13	Intergenic	Intergenic	-25291	NM_001081242	70549	Mm.33645	NM_027458	ENSMUSG00000052698	Tln2	5730421P04Rik|AI507121|AI787438|AL118320|mKIAA0320	talin 2	protein-coding
38	chr11	49810943	49812004	+	3.19	9.45	6.26	1.92e-13	intron (NM_013529, intron 5 of 18)	intron (NM_013529, intron 5 of 18)	17318	NM_013529	14584	Mm.24402	NM_013529	ENSMUSG00000020363	Gfpt2	AI480523|GFAT2	glutamine fructose-6-phosphate transaminase 2	protein-coding
39	chr18	5805728	5807375	+	2.92	9.79	6.87	2.14e-13	Intergenic	Intergenic	213904	NM_001360982	21417	Mm.3929	NM_011546	ENSMUSG00000024238	Zeb1	3110032K11Rik|AREB6|BZP|MEB1|Nil2|TCF-8|Tcf18|Tcf8|Tw|ZEB|Zfhep|Zfhx1a|Zfx1a|Zfx1ha|[delta]EF1	zinc finger E-box binding homeobox 1	protein-coding
40	chr4	123225808	123227044	+	3.33	9.74	6.42	2.16e-13	Intergenic	RMER15|LTR|ERVL	-7130	NM_013905	56198	Mm.103615	NM_013905	ENSMUSG00000032744	Heyl	Hey3|Hrt3|bHLHb33|hesr3	hairy/enhancer-of-split related with YRPW motif-like	protein-coding
41	chr9	61455654	61456658	+	3.2	9.28	6.07	2.17e-13	Intergenic	Intergenic	83790	NM_001083927	21887	Mm.24255	NM_009389	ENSMUSG00000032280	Tle3	2610103N05Rik|ESG|Grg3a|Grg3b|mKIAA1547	transducin-like enhancer of split 3	protein-coding
42	chr17	4735041	4736135	+	3.31	9.1	5.79	2.46e-13	Intergenic	Intergenic	100608	NR_130984	75117	Mm.429393	NR_130984		4930517M08Rik	-	RIKEN cDNA 4930517M08 gene	ncRNA
43	chr3	53165955	53166635	+	3.61	9.05	5.44	2.5e-13	intron (NM_175386, intron 2 of 3)	intron (NM_175386, intron 2 of 3)	124748	NM_175386	108927	Mm.118617	NM_175386	ENSMUSG00000048332	Lhfp	2810489O06Rik|AI194968|Lhfpl6	lipoma HMGIC fusion partner	protein-coding
44	chr12	71626438	71627928	+	3.14	9.55	6.41	3.09e-13	Intergenic	Intergenic	86576	NR_045941	73815	Mm.416916	NR_045941	ENSMUSG00000113630	4930404H11Rik	-	RIKEN cDNA 4930404H11 gene	ncRNA
45	chr1	90656241	90657611	+	3.13	9.34	6.2	3.81e-13	Intergenic	(GA)n|Simple_repeat|Simple_repeat	53501	NM_133805	108679	Mm.119177	NM_133805	ENSMUSG00000034432	Cops8	9430009J09Rik|AA408242|Csn8|Sgn8	COP9 signalosome subunit 8	protein-coding
46	chr8	26352008	26354060	+	2.65	10.69	8.04	4.98e-13	Intergenic	Intergenic	194865	NM_199042	73754	Mm.383241	NM_199042	ENSMUSG00000037214	Thap1	4833431A01Rik|AW490810	THAP domain containing, apoptosis associated protein 1	protein-coding
47	chr1	159393018	159393791	+	3.5	8.59	5.1	5.05e-13	Intergenic	Intergenic	53046	NR_039543	100628622		NR_039543	ENSMUSG00000105399	Mir1843b	mir-1843b|mmu-mir-1843b	microRNA 1843b	ncRNA
48	chr2	73046594	73047945	+	2.89	10.03	7.14	5.05e-13	Intergenic	Intergenic	-66823	NM_001018042	20687	Mm.124328	NM_011450	ENSMUSG00000027109	Sp3	D130027J01Rik	trans-acting transcription factor 3	protein-coding
49	chr11	86022383	86022881	+	3.74	8.39	4.65	5.47e-13	intron (NR_046030, intron 1 of 4)	intron (NR_046030, intron 1 of 4)	1718	NR_046030	629393	Mm.372867	NR_046030		Gm20759	-	predicted gene, 20759	ncRNA
50	chr5	129065351	129067769	+	2.7	9.39	6.69	6.27e-13	Intergenic	Intergenic	-30190	NM_001081342	243277	Mm.440501	NM_177734	ENSMUSG00000044017	Adgrd1	E230012M21Rik|Gpr133	adhesion G protein-coupled receptor D1	protein-coding
51	chr2	75158405	75158983	+	3.62	8.8	5.19	6.76e-13	Intergenic	Intergenic	285485	NR_040635	77269	Mm.389278	NR_040635		9430019J16Rik	-	RIKEN cDNA 9430019J16 gene	ncRNA
52	chr5	150979218	150980247	+	3.36	9.17	5.81	8e-13	intron (NM_013823, intron 1 of 4)	intron (NM_013823, intron 1 of 4)	27125	NM_013823	16591	Mm.6500	NM_013823	ENSMUSG00000058488	Kl	alpha-kl	klotho	protein-coding
53	chr2	103927151	103928160	+	2.82	9.27	6.45	8e-13	Intergenic	Intergenic	26704	NR_131913	100996933	Mm.394449	NR_131913		Lincred1	-	long intergenic non-protein coding RNA of erythroid differentiation 1	ncRNA
54	chr15	37373744	37375304	+	3.35	9.71	6.36	1.14e-12	intron (NM_001359845, intron 5 of 6)	intron (NM_001359845, intron 5 of 6)	-51030	NM_029113	74892	Mm.107630	NM_029113	ENSMUSG00000022288	4930447A16Rik	-	RIKEN cDNA 4930447A16 gene	protein-coding
55	chr8	48704338	48705155	+	3.68	8.59	4.91	1.15e-12	Intergenic	Intergenic	-30056	NM_001145937	23965	Mm.42191	NM_011857	ENSMUSG00000031561	Tenm3	2610100B16Rik|Odz1|Odz3|Ten-m3|mKIAA1455	teneurin transmembrane protein 3	protein-coding
56	chr17	63678021	63678677	+	3.19	8.73	5.53	1.39e-12	Intergenic	Intergenic	-177769	NM_015794	50758	Mm.136366	NM_015794	ENSMUSG00000023965	Fbxl17	6330576B01Rik|AI452053|BB073797|C130023C01Rik|Fbx13|Fbxo13	F-box and leucine-rich repeat protein 17	protein-coding
57	chr9	24919739	24920491	+	2.91	9.02	6.11	1.63e-12	Intergenic	Intergenic	-54093	NR_153861	102631612	Mm.410759	NR_153861		E130101E03Rik	-	RIKEN cDNA E130101E03 gene	ncRNA
58	chr9	43481927	43483214	+	2.89	9.44	6.56	1.7e-12	Intergenic	Intergenic	171807	NM_023655	72169	Mm.273277	NM_023655	ENSMUSG00000032013	Trim29	1110047J21Rik|2810431N19Rik|4732461M22Rik|AI119726	tripartite motif-containing 29	protein-coding
59	chr4	64078031	64078522	+	3.46	8.16	4.71	2.21e-12	Intergenic	Intergenic	-31261	NM_011607	21923	Mm.980	NM_011607	ENSMUSG00000028364	Tnc	AI528729|C130033P17Rik|Hxb|TN|TN-C|Ten|cytotactin|tenascin-C	tenascin C	protein-coding
60	chr6	53714874	53715568	+	3.56	8.46	4.9	2.84e-12	Intergenic	Intergenic	105604	NM_025817	66873	Mm.422727	NM_025817	ENSMUSG00000043496	Tril	1200009O22Rik|AI316813|mKIAA0644	TLR4 interactor with leucine-rich repeats	protein-coding
61	chr8	23287872	23288429	+	3.46	8.38	4.92	2.85e-12	Intergenic	RLTR14|LTR|ERV1	-31070	NM_001042484	57437	Mm.196269	NM_020585	ENSMUSG00000015341	Golga7	AB041568|C130038N16Rik|GCP16|GOLGA3AP1|HSPC041|R75586	golgi autoantigen, golgin subfamily a, 7	protein-coding
62	chr5	90075941	90076813	+	3.11	8.92	5.81	3.48e-12	Intergenic	Intergenic	147619	NM_001033310	231430	Mm.319697	NM_001033310	ENSMUSG00000035505	Cox18	BC038311	cytochrome c oxidase assembly protein 18	protein-coding
63	chr12	79726046	79726582	+	4	8.49	4.49	3.77e-12	intron (NM_009014, intron 8 of 10)	intron (NM_009014, intron 8 of 10)	198419	NR_131075	77290	Mm.395042	NR_131073	ENSMUSG00000112765	9430078K24Rik	-	RIKEN cDNA 9430078K24 gene	ncRNA
64	chr5	47396756	47397302	+	3.36	8.48	5.12	4.04e-12	Intergenic	Intergenic	-586126	NM_001291228	20563	Mm.289739	NM_178804	ENSMUSG00000031558	Slit2	Drad-1|E030015M03Rik|E130320P19Rik|Slil3|b2b1200.1Clo|mKIAA4141|slit-2	slit guidance ligand 2	protein-coding
65	chr13	75987982	75988509	+	3.04	8.47	5.43	4.34e-12	intron (NM_029343, intron 3 of 4)	intron (NM_029343, intron 3 of 4)	20506	NM_029343	75571	Mm.443291	NM_029343	ENSMUSG00000021590	Spata9	1700030K01Rik|4930599C08Rik|A930023H06Rik	spermatogenesis associated 9	protein-coding
66	chr8	126638877	126639651	+	2.83	9.13	6.3	4.4e-12	Intergenic	Intergenic	-45828	NM_001164598	270110	Mm.334918	NM_001164598	ENSMUSG00000051495	Irf2bp2	E130305N23Rik|IRF-2BP2	interferon regulatory factor 2 binding protein 2	protein-coding
67	chr15	33330122	33330733	+	3.54	8.05	4.5	4.74e-12	intron (NM_176073, intron 4 of 7)	intron (NM_176073, intron 4 of 7)	75512	NR_033608	73486	Mm.483393	NM_028551	ENSMUSG00000058101	1700084J12Rik	-	ribosomal protein L7-like 1 pseudogene	pseudo
68	chr11	62924068	62924968	+	2.88	8.98	6.1	4.8e-12	Intergenic	Intergenic	-26675	NM_025496	66338	Mm.46166	NM_025496	ENSMUSG00000042200	Cdrt4	1700019I23Rik	CMT1A duplicated region transcript 4	protein-coding
69	chr7	81139038	81139489	+	3.34	8.51	5.18	5.15e-12	intron (NM_001004184, intron 9 of 17)	intron (NM_001004184, intron 9 of 17)	24464	NM_001004184	434203	Mm.389909	NM_001004184	ENSMUSG00000025726	Slc28a1	Cnt1	solute carrier family 28 (sodium-coupled nucleoside transporter), member 1	protein-coding
70	chr10	8767345	8769054	+	2.7	9.3	6.6	5.3e-12	intron (NM_175155, intron 8 of 19)	intron (NM_175155, intron 8 of 19)	117871	NM_175155	70097	Mm.338275	NM_175155	ENSMUSG00000015305	Sash1	1100001C18Rik|2500002E12Rik|A330076K04Rik|mKIAA0790	SAM and SH3 domain containing 1	protein-coding
71	chr4	137396732	137397665	+	3.18	8.98	5.8	5.47e-12	Intergenic	Intergenic	12593	NM_001126318	242711	Mm.475541	NM_001126318	ENSMUSG00000078520	Cela3a	Gm13011	chymotrypsin-like elastase family, member 3A	protein-coding
72	chr2	50793374	50794102	+	3.27	8.64	5.37	5.71e-12	Intergenic	Intergenic	-115946	NR_033595	227885	Mm.301654	NR_033595	ENSMUSG00000083270	Gm13498	-	heat shock protein 90 alpha (cytosolic), class B member 1 pseudogene	pseudo
73	chr17	14505374	14505846	+	3.48	8.63	5.15	6.83e-12	Intergenic	Intergenic	-106668	NR_027986	74917	Mm.32228	NM_183107		4930474M22Rik	-	RIKEN cDNA 4930474M22 gene	ncRNA
74	chr15	51363294	51363906	+	3.31	8.5	5.19	8.5e-12	intron (NR_045092, intron 1 of 5)	intron (NR_045092, intron 1 of 5)	32010	NR_045092	100502643	Mm.131987	NR_045092	ENSMUSG00000115654	Gm19303	-	predicted gene, 19303	ncRNA
75	chr8	124196009	124196626	+	3.46	8.86	5.39	9.11e-12	Intergenic	Intergenic	-35077	NM_139272	108148	Mm.33808	NM_139272	ENSMUSG00000089704	Galnt2	AI480629	polypeptide N-acetylgalactosaminyltransferase 2	protein-coding
76	chr6	4489149	4490411	+	2.92	9.35	6.44	9.44e-12	Intergenic	Intergenic	-15838	NM_007743	12843	Mm.277792	NM_007743	ENSMUSG00000029661	Col1a2	AA960264|AI325291|Col1a-2|Cola-2|Cola2|oim	collagen, type I, alpha 2	protein-coding
77	chr1	119253432	119253800	+	3.95	8.09	4.14	9.54e-12	Intergenic	Intergenic	168632	NM_008381	16324	Mm.3092	NM_008381	ENSMUSG00000037035	Inhbb	-	inhibin beta-B	protein-coding
78	chr18	84880399	84881363	+	3.1	9.4	6.31	9.99e-12	Intergenic	Intergenic	29543	NM_001348159	109672	Mm.31018	NM_025797	ENSMUSG00000024646	Cyb5a	0610009N12Rik|Cyb5	cytochrome b5 type A (microsomal)	protein-coding
79	chr14	32828083	32828789	+	2.95	8.59	5.64	1.05e-11	Intergenic	Intergenic	-5526	NM_001164485	105511	Mm.32231	NM_001164485	ENSMUSG00000078127	Fam170b	4922501K12Rik|AI449756	family with sequence similarity 170, member B	protein-coding
80	chr1	154065651	154066355	+	3.02	8.7	5.68	1.06e-11	Intergenic	Intergenic	-135184	NM_001204908	100503355	Mm.484410	NM_001204908	ENSMUSG00000066797	Zfp648	Gm10178|Gm203	zinc finger protein 648	protein-coding
81	chr5	148607850	148608720	+	2.91	9.13	6.22	1.06e-11	Intergenic	Intergenic	-55497	NM_011908	24109	Mm.21846	NM_011908	ENSMUSG00000001687	Ubl3	AW108023|HCG|MUB|mmMUB	ubiquitin-like 3	protein-coding
82	chr10	53875552	53876400	+	3.37	8.89	5.52	1.1e-11	Intergenic	Intergenic	-125067	NM_001081428	75906	Mm.436785	NM_001081428	ENSMUSG00000019856	Fam184a	3110012E06Rik|4930438C08Rik|4930589M24Rik	family with sequence similarity 184, member A	protein-coding
83	chr7	96632722	96633670	+	3.22	8.42	5.21	1.17e-11	intron (NM_011858, intron 5 of 32)	intron (NM_011858, intron 5 of 32)	168353	NR_045874	791381	Mm.402112	NR_045874	ENSMUSG00000053049	Gm15413	-	predicted gene 15413	ncRNA
84	chr10	78079861	78080777	+	3.13	9.18	6.04	1.23e-11	TTS (NM_015790)	TTS (NM_015790)	10951	NM_015790	50723	Mm.17819	NM_015790	ENSMUSG00000000732	Icosl	AU044799|B7-H2|B7RP-1|B7h|BG071784|GI50|GL50|GL50-B|ICOS-L|Icoslg|LICOS|Ly115l|mKIAA0653	icos ligand	protein-coding
85	chr17	44418583	44419366	+	3.66	8.7	5.04	1.25e-11	Intergenic	Intergenic	230402	NM_172621	224796	Mm.37666	NM_172621	ENSMUSG00000023959	Clic5	5730531E12Rik|B330005L24|Gm322|jbg|nmf318	chloride intracellular channel 5	protein-coding
86	chr10	97389565	97390954	+	3.32	9.35	6.03	1.25e-11	Intergenic	Intergenic	-33219	NR_039547	100628616		NR_039547	ENSMUSG00000105557	Mir3966	mmu-mir-3966|mu-mir-3966	microRNA 3966	ncRNA
87	chr2	166729675	166730901	+	2.9	9.25	6.35	1.26e-11	Intergenic	Intergenic	-16456	NM_177782	277360	Mm.34420	NM_177782	ENSMUSG00000039621	Prex1	G630042G04|P-REX1|Setd6	phosphatidylinositol-3,4,5-trisphosphate-dependent Rac exchange factor 1	protein-coding
88	chr7	65914524	65915392	+	3.06	9.18	6.12	1.3e-11	intron (NM_011048, intron 2 of 21)	intron (NM_011048, intron 2 of 21)	52822	NM_001291184	18553	Mm.294007	NM_011048	ENSMUSG00000030513	Pcsk6	C86343|Pace4|SPC4|b2b2830Clo	proprotein convertase subtilisin/kexin type 6	protein-coding
89	chr13	60011961	60012844	+	3.04	9.04	5.99	1.56e-11	Intergenic	Intergenic	-17309	NR_046142	328263	Mm.123405	NR_046142	ENSMUSG00000114531	A530065N20Rik	A530065N20	RIKEN cDNA A530046M15 gene	ncRNA
90	chr11	120665096	120665990	+	2.75	9.09	6.34	1.56e-11	Intergenic	Intergenic	-4706	NM_175263	77583	Mm.32839	NM_175263	ENSMUSG00000042988	Notum	5730593N15Rik	notum palmitoleoyl-protein carboxylesterase	protein-coding
91	chr3	28141699	28142523	+	3.36	8.73	5.37	1.77e-11	Intergenic	Intergenic	-121103	NM_026910	665113	Mm.126193	NM_026910	ENSMUSG00000027692	Tnik	1500031A17Rik|4831440I19Rik|AI451411|C530008O15Rik|C630040K21Rik	TRAF2 and NCK interacting kinase	protein-coding
92	chr3	37838402	37839396	+	3	8.98	5.98	1.98e-11	Intergenic	Intergenic	-59914	NR_040559	626410	Mm.389417	NR_040559	ENSMUSG00000106461	Gm20755	-	predicted gene, 20755	ncRNA
93	chr7	73186430	73186958	+	3.74	8.44	4.7	2.23e-11	Intergenic	Intergenic	-84626	NR_046024	625243	Mm.261798	NR_046024	ENSMUSG00000108383	Gm6567	-	predicted gene 6567	ncRNA
94	chr6	100731977	100733154	+	2.66	9.71	7.06	2.27e-11	intron (NM_198612, intron 1 of 6)	intron (NM_198612, intron 1 of 6)	27831	NM_198612	232313	Mm.272037	NM_198612	ENSMUSG00000030074	Gxylt2	Glt8d4|Gm152	glucoside xylosyltransferase 2	protein-coding
95	chr1	149897981	149898629	+	3.11	8.77	5.65	2.35e-11	intron (NM_008869, intron 5 of 17)	intron (NM_008869, intron 5 of 17)	24134	NM_001305632	18783	Mm.4186	NM_008869	ENSMUSG00000056220	Pla2g4a	Pla2g4|cPLA2|cPLA2-alpha|cPLA2alpha	phospholipase A2, group IVA (cytosolic, calcium-dependent)	protein-coding
96	chr8	31272596	31273360	+	2.83	9.31	6.48	2.35e-11	Intergenic	Intergenic	85647	NM_134161	171167	Mm.334477	NM_134161	ENSMUSG00000046152	Fut10	fuc-TX|fut10A	fucosyltransferase 10	protein-coding
97	chr8	123185354	123186677	+	2.67	9.48	6.81	2.35e-11	promoter-TSS (NM_007876)	promoter-TSS (NM_007876)	-220	NM_007876	13479	Mm.20388	NM_007876	ENSMUSG00000019278	Dpep1	AI327012|MBD	dipeptidase 1 (renal)	protein-coding
98	chr5	102623893	102624574	+	3.35	8.65	5.3	2.48e-11	intron (NM_029270, intron 2 of 9)	intron (NM_029270, intron 2 of 9)	142842	NM_146161	231532	Mm.440191	NM_029270	ENSMUSG00000057315	Arhgap24	0610025G21Rik	Rho GTPase activating protein 24	protein-coding
99	chr10	38908068	38908833	+	2.83	9.39	6.56	2.51e-11	Intergenic	Intergenic	-57065	NM_010681	16775	Mm.258065	NM_010681	ENSMUSG00000019846	Lama4	-	laminin, alpha 4	protein-coding
100	chr12	91774745	91775349	+	3.16	8.9	5.74	3.09e-11	intron (NM_175367, intron 1 of 6)	intron (NM_175367, intron 1 of 6)	11389	NM_175367	108800	Mm.23125	NM_175367	ENSMUSG00000020961	Ston2	4933401N24Rik|AI425999|AW544599	stonin 2	protein-coding
101	chr11	118448163	118449039	+	2.62	8.99	6.37	3.74e-11	non-coding (NR_045902, exon 2 of 3)	non-coding (NR_045902, exon 2 of 3)	5067	NM_001204130	56745	Mm.23845	NM_019959	ENSMUSG00000017446	C1qtnf1	1600017K21Rik|CTRP1|Zsig37	C1q and tumor necrosis factor related protein 1	protein-coding
102	chr9	61163657	61165281	+	2.77	9.48	6.71	3.9e-11	Intergenic	Intergenic	25954	NR_045705	619328	Mm.325722	NR_045705	ENSMUSG00000110998	I730028E13Rik	-	RIKEN cDNA I730028E13 gene	ncRNA
103	chr9	116847171	116848025	+	3.14	9.11	5.97	3.96e-11	intron (NM_001172124, intron 4 of 13)	MIR3|SINE|MIR	404885	NM_001172122	207181	Mm.326411	NM_178660	ENSMUSG00000039607	Rbms3	6720477E09Rik|8430436O14Rik	RNA binding motif, single stranded interacting protein	protein-coding
104	chr4	58578322	58578964	+	3.07	8.7	5.63	4.36e-11	Intergenic	Intergenic	-25152	NM_010336	14745	Mm.4772	NM_010336	ENSMUSG00000038668	Lpar1	AI326300|Edg2|Gpcr26|Kdt2|lpA1|vzg-1	lysophosphatidic acid receptor 1	protein-coding
105	chr5	21266965	21267633	+	3.46	8.37	4.92	4.56e-11	intron (NR_153365, intron 18 of 26)	Lx8|LINE|L1	81032	NM_001359876	212167	Mm.121705	NM_175437	ENSMUSG00000039934	Gsap	A530088I07Rik|Pion	gamma-secretase activating protein	protein-coding
106	chr18	78237023	78238267	+	2.97	9.51	6.54	6.13e-11	intron (NM_207651, intron 3 of 21)	intron (NM_207651, intron 3 of 21)	-31205	NM_001110274	27411	Mm.44158	NM_030683	ENSMUSG00000024552	Slc14a2	UT-A1|UT-A3	solute carrier family 14 (urea transporter), member 2	protein-coding
107	chr16	38393831	38394670	+	3.34	8.79	5.46	6.25e-11	Intergenic	Intergenic	32060	NM_001081984	64082	Mm.390856	NM_022318	ENSMUSG00000022803	Popdc2	AV006127|Pop2	popeye domain containing 2	protein-coding
108	chr5	35628468	35629212	+	2.98	9.03	6.05	6.4e-11	Intergenic	Intergenic	-40077	NR_045807	74364	Mm.473123	NM_175208	ENSMUSG00000055061	4931431C16Rik	-	RIKEN cDNA 4931431C16 gene	ncRNA
109	chr7	36209952	36210437	+	3.49	8.06	4.56	6.54e-11	Intergenic	Intergenic	-407205	NM_177739	668501	Mm.286296	NM_177739	ENSMUSG00000044452	Zfp507	1810022O10Rik|A230056M16Rik|AL024009|AU021817|BB105092|Gm480|Znf507|mKIAA1084	zinc finger protein 507	protein-coding
110	chr2	50690127	50691166	+	3.16	9.1	5.94	6.69e-11	Intergenic	L1MC4|LINE|L1	-219038	NR_033595	227885	Mm.301654	NR_033595	ENSMUSG00000083270	Gm13498	-	heat shock protein 90 alpha (cytosolic), class B member 1 pseudogene	pseudo
111	chr2	125024155	125025091	+	2.9	8.85	5.95	6.92e-11	Intergenic	Intergenic	-43504	NM_175034	317750	Mm.330538	NM_175034	ENSMUSG00000035183	Slc24a5	F630045L20Rik|JSX|NCKX5|NCX5|Oca6	solute carrier family 24, member 5	protein-coding
112	chr6	55198979	55199500	+	3.51	8.62	5.11	6.98e-11	Intergenic	Intergenic	-4144	NM_177883	330323	Mm.268997	NM_177883	ENSMUSG00000038022	Mindy4	C330043M08Rik|Fam188b|Gm1406	MINDY lysine 48 deubiquitinase 4	protein-coding
113	chr6	108390695	108391358	+	3.35	8.41	5.06	6.98e-11	intron (NM_010585, intron 24 of 61)	intron (NM_010585, intron 24 of 61)	-98717	NR_106121	102465766		NR_106121	ENSMUSG00000105697	Mir7661	mmu-mir-7661	microRNA 7661	ncRNA
114	chr13	103338576	103339314	+	3.2	8.66	5.45	6.98e-11	Intergenic	Intergenic	-4453	NM_175171	328329	Mm.202606	NM_175171	ENSMUSG00000034751	Mast4	4930420O11Rik|AI642422|mKIAA0303	microtubule associated serine/threonine kinase family member 4	protein-coding
115	chr4	137393292	137394250	+	3.22	9	5.78	7.12e-11	Intergenic	Intergenic	16020	NM_001126318	242711	Mm.475541	NM_001126318	ENSMUSG00000078520	Cela3a	Gm13011	chymotrypsin-like elastase family, member 3A	protein-coding
116	chr12	10514215	10514840	+	3.05	8.58	5.53	7.12e-11	intron (NR_110487, intron 10 of 11)	intron (NR_110487, intron 10 of 11)	68139	NR_110487	328061	Mm.56067	NR_110487	ENSMUSG00000112792	Gm38407	4931412M21	predicted gene, 38407	ncRNA
117	chr10	4481572	4482154	+	3.61	8.12	4.5	7.13e-11	Intergenic	Intergenic	-28009	NM_001195672	100504234	Mm.291807	NM_001195672	ENSMUSG00000019767	Ccdc170	Gm221	coiled-coil domain containing 170	protein-coding
118	chr6	114478651	114479375	+	3.17	9.11	5.94	7.32e-11	intron (NM_001317124, intron 1 of 1)	intron (NM_001317124, intron 1 of 1)	20491	NM_001317124	15465	Mm.333327	NM_008285	ENSMUSG00000053004	Hrh1	Bphs|H1R|HH1R|Hir	histamine receptor H1	protein-coding
119	chr9	43263692	43264668	+	2.98	9.4	6.41	7.32e-11	intron (NM_001243261, intron 1 of 2)	intron (NM_001243261, intron 1 of 2)	4301	NM_001243261	235302	Mm.135745	NM_001243261		D630033O11Rik	Gm588	RIKEN cDNA D630033O11 gene	protein-coding
120	chr14	64639513	64639997	+	3.4	8.7	5.3	7.91e-11	Intergenic	Intergenic	-12776	NM_001081177	16554	Mm.23611	NM_001081177	ENSMUSG00000060012	Kif13b	5330429L19Rik|6030414C01|AI429803|C130021D12Rik|GAKIN	kinesin family member 13B	protein-coding
121	chr9	58295729	58296780	+	2.59	9.35	6.76	1.06e-10	intron (NM_010729, intron 2 of 6)	intron (NM_010729, intron 2 of 6)	16958	NM_010729	16949	Mm.250492	NM_010729	ENSMUSG00000032334	Loxl1	Loxl	lysyl oxidase-like 1	protein-coding
122	chr7	110296771	110298294	+	1.91	10.17	8.25	1.06e-10	Intergenic	Intergenic	75829	NM_009302	20947	Mm.334144	NM_009302	ENSMUSG00000031015	Swap70	70kDa|AV235546	SWA-70 protein	protein-coding
123	chr2	165733602	165734462	+	3.32	8.54	5.22	1.09e-10	intron (NM_001271962, intron 9 of 15)	MER102b|DNA|hAT-Charlie	78734	NM_010165	14049	Mm.282719	NM_010165	ENSMUSG00000017897	Eya2	Eab1	EYA transcriptional coactivator and phosphatase 2	protein-coding
124	chr5	38881784	38882557	+	3.32	8.61	5.29	1.13e-10	Intergenic	Intergenic	-5477	NM_013748	27278	Mm.440845	NM_013748	ENSMUSG00000039315	Clnk	MIST	cytokine-dependent hematopoietic cell linker	protein-coding
125	chr4	142756128	142756928	+	3.07	8.87	5.8	1.19e-10	Intergenic	Intergenic	379634	NR_105988	102465618		NR_105988	ENSMUSG00000106597	Mir7021	mmu-mir-7021	microRNA 7021	ncRNA
126	chr9	58158452	58159559	+	2.74	9.09	6.35	1.22e-10	promoter-TSS (NM_001195431)	promoter-TSS (NM_001195431)	216	NM_012043	26968	Mm.367887	NM_012043	ENSMUSG00000037206	Islr	AW553146|Meflin	immunoglobulin superfamily containing leucine-rich repeat	protein-coding
127	chr10	76635769	76636395	+	3.85	8.39	4.54	1.27e-10	Intergenic	Intergenic	-12452	NM_001347207	12834	Mm.1949	NM_146007	ENSMUSG00000020241	Col6a2	Col6a-2	collagen, type VI, alpha 2	protein-coding
128	chr4	4708125	4708835	+	2.88	8.98	6.1	1.27e-10	Intergenic	Intergenic	84826	NM_177730	242291	Mm.218889	NM_177730	ENSMUSG00000066324	Impad1	1110001C20Rik|AA408880|AI451589|AL022796|B230207P20|Jaws|gPAPP	inositol monophosphatase domain containing 1	protein-coding
129	chr15	34372846	34373576	+	2.73	8.99	6.26	1.31e-10	intron (NM_001358780, intron 4 of 18)	intron (NM_001358780, intron 4 of 18)	-15339	NM_001256161	77358	Mm.402759	NM_001256161	ENSMUSG00000094447	9430069I07Rik	-	RIKEN cDNA 9430069I07 gene	protein-coding
130	chr7	65902056	65903598	+	2.34	10.11	7.77	1.33e-10	intron (NM_011048, intron 1 of 21)	intron (NM_011048, intron 1 of 21)	40691	NM_001291184	18553	Mm.294007	NM_011048	ENSMUSG00000030513	Pcsk6	C86343|Pace4|SPC4|b2b2830Clo	proprotein convertase subtilisin/kexin type 6	protein-coding
131	chr1	153134089	153134884	+	2.83	8.81	5.98	1.49e-10	intron (NM_008485, intron 16 of 23)	intron (NM_008485, intron 16 of 23)	51961	NM_008485	16782	Mm.329272	NM_008485	ENSMUSG00000026479	Lamc2	AA589349	laminin, gamma 2	protein-coding
132	chr4	53106748	53107129	+	4.07	7.75	3.68	1.51e-10	intron (NM_013454, intron 7 of 49)	intron (NM_013454, intron 7 of 49)	52957	NM_013454	11303	Mm.277376	NM_013454	ENSMUSG00000015243	Abca1	ABC-1|Abc1	ATP-binding cassette, sub-family A (ABC1), member 1	protein-coding
133	chr5	73881740	73882455	+	2.72	9.36	6.64	1.55e-10	Intergenic	Intergenic	186314	NM_177561	69727	Mm.48795	NM_177561	ENSMUSG00000054814	Usp46	1190009E20Rik|2410018I08Rik|AI451644	ubiquitin specific peptidase 46	protein-coding
134	chr4	137770758	137771910	+	2.45	9.58	7.13	1.55e-10	intron (NM_007431, intron 1 of 11)	intron (NM_007431, intron 1 of 11)	-4859	NM_001287172	11647	Mm.288186	NM_007431	ENSMUSG00000028766	Alpl	ALP|APTNAP|Akp-2|Akp2|TNAP|TNSALP	alkaline phosphatase, liver/bone/kidney	protein-coding
135	chr18	60992136	60993403	+	2.74	9.27	6.52	1.57e-10	Intergenic	Intergenic	21430	NM_201353	240332	Mm.39846	NM_201353	ENSMUSG00000052026	Slc6a7	AW455934|PROT	solute carrier family 6 (neurotransmitter transporter, L-proline), member 7	protein-coding
136	chr16	34331515	34332176	+	2.72	8.81	6.09	1.57e-10	intron (NM_177357, intron 6 of 59)	intron (NM_177357, intron 6 of 59)	182182	NM_001164268	545156	Mm.82274	NM_177357	ENSMUSG00000061751	Kalrn	2210407G14Rik|AV235988|DUET|E530005C20Rik|Gm539|Hapip|TRAD	kalirin, RhoGEF kinase	protein-coding
137	chr14	65703922	65704680	+	3.13	8.52	5.39	1.7e-10	intron (NM_001168318, intron 3 of 7)	intron (NM_001168318, intron 3 of 7)	37898	NM_001168318	71145	Mm.83840	NM_028903	ENSMUSG00000022032	Scara5	4932433F15Rik|4933425F03Rik|AV278087|Tesr	scavenger receptor class A, member 5	protein-coding
138	chr3	55571557	55572162	+	3.72	7.85	4.13	1.71e-10	Intergenic	Intergenic	110131	NM_001357476	13175	Mm.393242	NM_019978	ENSMUSG00000027797	Dclk1	1700113D08Rik|2810480F11Rik|AI836758|Click-I|Cpg16|Dcamkl1|Dcl|Dclk|mKIAA0369	doublecortin-like kinase 1	protein-coding
139	chr11	114699430	114700226	+	3.29	8.98	5.69	1.76e-10	intron (NM_053273, intron 4 of 13)	intron (NM_053273, intron 4 of 13)	24360	NM_053273	117160	Mm.271934	NM_053273	ENSMUSG00000034714	Ttyh2	1110001A03Rik	tweety family member 2	protein-coding
140	chr1	12715335	12715896	+	3.13	8.54	5.41	1.76e-10	intron (NM_001198566, intron 1 of 20)	LTR53B|LTR|ERVL	-2930	NM_172294	240725	Mm.45563	NM_172294	ENSMUSG00000016918	Sulf1	AI467640|AW121680|mKIAA1077	sulfatase 1	protein-coding
141	chr13	113729653	113730890	+	2.92	8.96	6.03	1.76e-10	Intergenic	Intergenic	-64237	NM_172595	218639	Mm.79837	NM_172595	ENSMUSG00000042348	Arl15	A430036I03|Arfrp2|C230032K13Rik	ADP-ribosylation factor-like 15	protein-coding
142	chr10	70814433	70815320	+	2.78	9.17	6.38	1.76e-10	Intergenic	Intergenic	-158913	NR_045292	319646	Mm.483039	NR_045291	ENSMUSG00000037747	D630013N20Rik	-	RIKEN cDNA D630013N20 gene	ncRNA
143	chr11	19143049	19144026	+	2.79	9	6.21	1.88e-10	Intergenic	Intergenic	78262	NR_046037	74059	Mm.292321	NR_046037	ENSMUSG00000086025	4933406G16Rik	-	RIKEN cDNA 4933406G16 gene	ncRNA
144	chr11	45263911	45264531	+	3.24	8.6	5.36	1.94e-10	Intergenic	Intergenic	-147293	NR_045100	100504255	Mm.123608	NR_045100	ENSMUSG00000084773	Gm12159	-	predicted gene 12159	ncRNA
145	chr3	75860573	75861348	+	3.08	8.87	5.79	2.05e-10	Intergenic	Intergenic	95989	NM_001291069	73124	Mm.249232	NM_175193	ENSMUSG00000034109	Golim4	3110027H23Rik|GIMPC|GPP130|Golph4|P138	golgi integral membrane protein 4	protein-coding
146	chr5	149378758	149379761	+	2.58	9.3	6.72	2.12e-10	Intergenic	Intergenic	-32490	NM_027519	70717	Mm.252139	NM_027519	ENSMUSG00000029659	Medag	6330406I15Rik|Awms3|MEDA-4|Meda4|mAWMS3	mesenteric estrogen dependent adipogenesis	protein-coding
147	chr18	33622705	33623792	+	2.85	8.8	5.94	2.17e-10	Intergenic	Intergenic	159085	NR_045415	433171	Mm.353332	NR_045415		Gm10549	-	predicted gene 10549	ncRNA
148	chr7	117310586	117311203	+	3.19	8.24	5.06	2.27e-10	Intergenic	Intergenic	-70085	NM_175645	233781	Mm.461427	NM_175645	ENSMUSG00000030657	Xylt1	8030490L12	xylosyltransferase 1	protein-coding
149	chr4	47236941	47237674	+	2.84	9.35	6.51	2.3e-10	intron (NM_009928, intron 2 of 39)	intron (NM_009928, intron 2 of 39)	29295	NM_009928	12819	Mm.233547	NM_009928	ENSMUSG00000028339	Col15a1	-	collagen, type XV, alpha 1	protein-coding
150	chr8	107146232	107146618	+	4.17	7.48	3.31	2.61e-10	Intergenic	MLTR14|LTR|ERV1	-4236	NM_025558	66427	Mm.20242	NM_025558	ENSMUSG00000031924	Cyb5b	1810044O22Rik|AU015618|Cyb5m	cytochrome b5 type B	protein-coding
151	chr14	79689839	79690506	+	3.69	8.43	4.75	2.66e-10	Intergenic	Intergenic	-12748	NR_045060	73989	Mm.107775	NR_045060	ENSMUSG00000115422	4930452G13Rik	-	RIKEN cDNA 4930452G13 gene	ncRNA
152	chr11	112850078	112851186	+	2.85	8.86	6.01	2.74e-10	Intergenic	L4_C_Mam|LINE|RTE-X	-25504	NR_130164	76393	Mm.86795	NR_130164		1700012H19Rik	-	RIKEN cDNA 1700012H19 gene	ncRNA
153	chr4	101719243	101719702	+	3.29	8.03	4.74	2.79e-10	intron (NM_146146, intron 1 of 18)	intron (NM_146146, intron 1 of 18)	2065	NM_010704	16847	Mm.259282	NM_010704	ENSMUSG00000057722	Lepr	LEPROT|Leprb|Modb1|OB-RGRP|Obr|db|diabetes|obese-like|obl	leptin receptor	protein-coding
154	chr9	37047502	37047935	+	3.15	7.97	4.81	2.79e-10	intron (NM_001029838, intron 2 of 12)	intron (NM_001029838, intron 2 of 12)	99604	NM_001029838	208076	Mm.260335	NM_148950	ENSMUSG00000035934	Pknox2	D230005H23Rik|Prep2	Pbx/knotted 1 homeobox 2	protein-coding
155	chr11	95263532	95264718	+	2.84	9.16	6.32	2.79e-10	intron (NM_053093, intron 1 of 3)	intron (NM_053093, intron 1 of 3)	2596	NM_053093	93670	Mm.40085	NM_053093	ENSMUSG00000020872	Tac4	AW489379|PPT-C	tachykinin 4	protein-coding
156	chr12	110077493	110078652	+	3.37	9.08	5.71	2.81e-10	Intergenic	Intergenic	80001	NR_045466	67280	Mm.390495	NR_045466	ENSMUSG00000113331	3110009F21Rik	-	RIKEN cDNA 3110009F21 gene	ncRNA
157	chr5	43455981	43456419	+	3.66	8.05	4.38	2.87e-10	Intergenic	Intergenic	-59369	NM_001135172	109323	Mm.275553	NM_175425	ENSMUSG00000061535	C1qtnf7	5530401N20Rik|8430425G24Rik|Ctrp7	C1q and tumor necrosis factor related protein 7	protein-coding
158	chr13	43831286	43831703	+	4.03	7.5	3.47	2.89e-10	Intergenic	Intergenic	46382	NM_001289915	12522	Mm.57175	NM_009856	ENSMUSG00000015396	Cd83	-	CD83 antigen	protein-coding
159	chr16	24282078	24282877	+	2.26	9.72	7.46	2.93e-10	Intergenic	Intergenic	-110873	NM_178665	210126	Mm.209385	NM_178665	ENSMUSG00000033306	Lpp	9430020K16Rik|AA959454|AU024130|B130055L10Rik|C79715|D630048H16	LIM domain containing preferred translocation partner in lipoma	protein-coding
160	chr9	69164666	69165077	+	3.32	8.67	5.34	3.07e-10	intron (NM_013646, intron 1 of 10)	intron (NM_013646, intron 1 of 10)	-124970	NM_001289916	19883	Mm.378450	NM_013646	ENSMUSG00000032238	Rora	9530021D13Rik|Nr1f1|ROR1|ROR2|ROR3|nmf267|sg|staggerer|tmgc26	RAR-related orphan receptor alpha	protein-coding
161	chr4	64076264	64076960	+	3.05	8.88	5.83	3.12e-10	Intergenic	Intergenic	-29597	NM_011607	21923	Mm.980	NM_011607	ENSMUSG00000028364	Tnc	AI528729|C130033P17Rik|Hxb|TN|TN-C|Ten|cytotactin|tenascin-C	tenascin C	protein-coding
162	chr9	32971352	32972435	+	3.09	9.1	6.01	3.38e-10	Intergenic	Intergenic	-42927	NR_131058	330917	Mm.488283	NR_131058		Gm27162	A430016B06	predicted gene 27162	ncRNA
163	chr7	36309886	36310626	+	3.14	8.78	5.64	3.41e-10	Intergenic	Intergenic	-387862	NM_172298	243931	Mm.44141	NM_172298	ENSMUSG00000021217	Tshz3	A630038G13Rik|Tsh3|Zfp537|mKIAA1474|teashirt3	teashirt zinc finger family member 3	protein-coding
164	chr8	124448991	124449796	+	3.25	8.44	5.19	3.42e-10	Intergenic	Intergenic	-15457	NM_171824	209966	Mm.234233	NM_171824	ENSMUSG00000050751	Pgbd5	2900019M05Rik|AI854313	piggyBac transposable element derived 5	protein-coding
165	chr4	75466759	75467409	+	2.95	8.19	5.24	3.82e-10	Intergenic	Intergenic	-188792	NM_025849	66928	Mm.24332	NM_025849	ENSMUSG00000028398	Dmac1	1700027K24Rik|3110001D03Rik|Tmem261	distal membrane arm assembly complex 1	protein-coding
166	chr10	75632571	75633423	+	2.81	9.35	6.54	3.89e-10	Intergenic	Intergenic	11011	NM_027890	71733	Mm.247956	NM_027890	ENSMUSG00000006342	Susd2	1200011D11Rik	sushi domain containing 2	protein-coding
167	chr14	66557481	66558049	+	3.23	8.21	4.98	3.96e-10	Intergenic	Intergenic	-77486	NM_001271759	11549	Mm.57064	NM_013461	ENSMUSG00000045875	Adra1a	Adra1c	adrenergic receptor, alpha 1a	protein-coding
168	chr7	98558263	98559015	+	3.09	9.2	6.11	3.96e-10	Intergenic	Intergenic	64417	NM_001113379	434215	Mm.323057	NM_001113379	ENSMUSG00000090958	Lrrc32	AI426318|D11S833Eh|D7H11S833E|EG434215|Garp	leucine rich repeat containing 32	protein-coding
169	chr1	162985967	162986833	+	3.02	8.13	5.11	4.02e-10	Intergenic	Intergenic	-1872	NM_008030	14262	Mm.2900	NM_008030	ENSMUSG00000026691	Fmo3	AW111792	flavin containing monooxygenase 3	protein-coding
170	chr7	97386115	97387474	+	2.55	9.01	6.45	4.02e-10	intron (NM_199035, intron 8 of 12)	intron (NM_199035, intron 8 of 12)	-13209	NM_024220	68197	Mm.334031	NM_024220	ENSMUSG00000030647	Ndufc2	1810004I06Rik|2010300P09Rik|G1|R75094	NADH dehydrogenase (ubiquinone) 1, subcomplex unknown, 2	protein-coding
171	chr2	30588443	30590157	+	2.34	9.63	7.28	4.02e-10	Intergenic	Intergenic	-5744	NM_030137	78617	Mm.40413	NM_030137	ENSMUSG00000047363	Cstad	9530039B02Rik	CSA-conditional, T cell activation-dependent protein	protein-coding
172	chr2	17316865	17317550	+	3.35	8.04	4.69	4.23e-10	Intergenic	L3|LINE|CR1	-246307	NR_105847	102465964		NR_105847	ENSMUSG00000099161	Mir6419	Gm27713|mmu-mir-6419	microRNA 6419	ncRNA
173	chr10	19627391	19628124	+	2.99	8.61	5.62	4.23e-10	intron (NM_178258, intron 3 of 4)	intron (NM_178258, intron 3 of 4)	5729	NM_178258	237310	Mm.331979	NM_178258	ENSMUSG00000039760	Il22ra2	CRF2-10|CRF2-s1|CRF2X|Il-22bp	interleukin 22 receptor, alpha 2	protein-coding
174	chr2	167235239	167235924	+	2.57	9.36	6.8	4.23e-10	intron (NM_008968, intron 1 of 9)	intron (NM_008968, intron 1 of 9)	4956	NM_008968	19223	Mm.2339	NM_008968	ENSMUSG00000017969	Ptgis	Cyp8|Cyp8a1|Pgis	prostaglandin I2 (prostacyclin) synthase	protein-coding
175	chr2	152639314	152640391	+	2.75	9.55	6.8	4.27e-10	Intergenic	Intergenic	12844	NM_009047	19700	Mm.8752	NM_009047	ENSMUSG00000000359	Rem1	E030011C07Rik|Ras|Rem	rad and gem related GTP binding protein 1	protein-coding
176	chr8	116383026	116383879	+	3.06	8.22	5.16	4.37e-10	Intergenic	Intergenic	-121563	NM_029297	75465	Mm.23114	NM_029297	ENSMUSG00000034467	Dynlrb2	1700009A04Rik|DNLC2B|Dncl2b	dynein light chain roadblock-type 2	protein-coding
177	chr3	38322341	38322834	+	3.02	8.88	5.86	4.39e-10	Intergenic	Intergenic	-114468	NR_040541	71342	Mm.410782	NR_040541	ENSMUSG00000106002	5430434I15Rik	-	RIKEN cDNA 5430434I15 gene	ncRNA
178	chr11	64537213	64537650	+	3.39	8.07	4.68	4.53e-10	Intergenic	Intergenic	-100757	NR_028445	654805	Mm.436132	NR_028445		F930015N05Rik	-	RIKEN cDNA F930015N05 gene	ncRNA
179	chr9	22945384	22945995	+	3.12	8.3	5.18	4.53e-10	Intergenic	Intergenic	-277387	NM_028472	73230	Mm.335020	NM_028472	ENSMUSG00000031963	Bmper	3110056H04Rik|CV-2|Crim3|Cv2	BMP-binding endothelial regulator	protein-coding
180	chr4	97476677	97477275	+	2.61	8.7	6.09	4.53e-10	Intergenic	Intergenic	-104967	NM_001122952	18027	Mm.31274	NM_010905	ENSMUSG00000028565	Nfia	1110047K16Rik|9430022M17Rik|CTF|NF1-A|NF1A	nuclear factor I/A	protein-coding
181	chr5	35646747	35648596	+	2.74	9.35	6.61	4.61e-10	Intergenic	Intergenic	32109	NM_001042615	78558	Mm.274255	NM_030127	ENSMUSG00000029096	Htra3	2210021K23Rik|9530081K03Rik|Prsp|Tasp	HtrA serine peptidase 3	protein-coding
182	chr1	118927508	118928226	+	3.25	8.31	5.06	4.91e-10	intron (NM_001081125, intron 2 of 13)	intron (NM_001081125, intron 2 of 13)	-26353	NR_105764	102465176		NR_105764	ENSMUSG00000098273	Mir6346	Gm27829|mmu-mir-6346	microRNA 6346	ncRNA
183	chr2	118039211	118040143	+	3.02	9.46	6.44	5.05e-10	intron (NR_126479, intron 4 of 9)	intron (NR_126479, intron 4 of 9)	71525	NR_126479	329496	Mm.235844	NR_126479	ENSMUSG00000087203	Gm13986	C230060E24	predicted gene 13986	ncRNA
184	chr4	150772068	150772655	+	2.92	8.82	5.9	5.05e-10	Intergenic	Intergenic	-81435	NM_001356323	74155	Mm.318841	NM_133753	ENSMUSG00000028967	Errfi1	1300002F13Rik|AI788755|Mig-6|Mig6|RALT	ERBB receptor feedback inhibitor 1	protein-coding
185	chr13	20290162	20290829	+	3.2	8.58	5.37	5.27e-10	intron (NM_080288, intron 13 of 21)	intron (NM_080288, intron 13 of 21)	-182495	NM_198093	140580	Mm.342392	NM_080288	ENSMUSG00000041112	Elmo1	6330578D22Rik|C230095H21Rik|CED-12	engulfment and cell motility 1	protein-coding
186	chr4	47586848	47587746	+	3.22	9.31	6.09	5.57e-10	Intergenic	Intergenic	112636	NM_024171	66212	Mm.20188	NM_024171	ENSMUSG00000053317	Sec61b	1190006C12Rik|AI326121|AW122942	Sec61 beta subunit	protein-coding
187	chr4	34908111	34908560	+	3.21	8.09	4.87	5.66e-10	TTS (NM_009889)	TTS (NM_009889)	3146	NR_040652	73696	Mm.1361	NR_040652	ENSMUSG00000085824	Platr9	2410114N07Rik	pluripotency associated transcript 9	ncRNA
188	chr1	90522073	90522859	+	3.2	8.64	5.44	5.66e-10	Intergenic	Intergenic	-80959	NM_133805	108679	Mm.119177	NM_133805	ENSMUSG00000034432	Cops8	9430009J09Rik|AA408242|Csn8|Sgn8	COP9 signalosome subunit 8	protein-coding
189	chr1	80010611	80011153	+	3.4	8.39	5	6.6e-10	Intergenic	Intergenic	-152217	NM_009255	20720	Mm.3093	NM_009255	ENSMUSG00000026249	Serpine2	B230326M24Rik|PAI-1|PI-7|PI7|PN-1|Spi4	serine (or cysteine) peptidase inhibitor, clade E, member 2	protein-coding
190	chr18	64381909	64382533	+	3.42	8.35	4.93	7.2e-10	intron (NM_194268, intron 1 of 1)	Lx8|LINE|L1	41857	NM_194268	225631	Mm.234723	NM_194268	ENSMUSG00000045991	Onecut2	C730009D12|OC-2|Oc2	one cut domain, family member 2	protein-coding
191	chr13	13487816	13488512	+	3.01	8.84	5.83	7.3e-10	intron (NM_010917, intron 10 of 19)	intron (NM_010917, intron 10 of 19)	50562	NM_010917	18073	Mm.4691	NM_010917	ENSMUSG00000005397	Nid1	A630025O17|Nid|entactin|entactin-1|nidogen-1	nidogen 1	protein-coding
192	chr2	170329876	170330980	+	2.74	9.1	6.35	7.3e-10	Intergenic	Intergenic	-25933	NR_040610	73303	Mm.443297	NR_040610	ENSMUSG00000086999	Bcas1os2	1700040N02Rik	breast carcinoma amplified sequence 1, opposite strand 2	ncRNA
193	chr17	63660619	63661512	+	3	8.95	5.95	7.57e-10	Intergenic	Intergenic	-160485	NM_015794	50758	Mm.136366	NM_015794	ENSMUSG00000023965	Fbxl17	6330576B01Rik|AI452053|BB073797|C130023C01Rik|Fbx13|Fbxo13	F-box and leucine-rich repeat protein 17	protein-coding
194	chr16	44996565	44997219	+	3.07	8.19	5.12	7.64e-10	Intergenic	Intergenic	53214	NM_001128133	74603	Mm.297337	NM_027578	ENSMUSG00000036172	Cd200r3	4733401I18Rik|4833409J19Rik|AI505817|BB106877|mCD200RLb	CD200 receptor 3	protein-coding
195	chr2	35282044	35282783	+	2.93	8.92	5.99	7.64e-10	promoter-TSS (NM_146120)	promoter-TSS (NM_146120)	33	NM_146120	227753	Mm.443	NM_146120	ENSMUSG00000026879	Gsn	ADF	gelsolin	protein-coding
196	chr1	182483626	182484477	+	2.82	9.14	6.33	7.64e-10	intron (NM_009794, intron 10 of 20)	intron (NM_009794, intron 10 of 20)	33559	NM_009794	12334	Mm.19306	NM_009794	ENSMUSG00000026509	Capn2	AI326419|CALP80|Capa-2|Capa2|m-calpain|m-calpin	calpain 2	protein-coding
197	chr10	76648683	76649224	+	3.18	8.55	5.37	7.69e-10	Intergenic	Intergenic	-25323	NM_001347207	12834	Mm.1949	NM_146007	ENSMUSG00000020241	Col6a2	Col6a-2	collagen, type VI, alpha 2	protein-coding
198	chr18	47585387	47586017	+	-2.63	6.69	9.32	7.8e-10	intron (NR_033454, intron 1 of 5)	intron (NR_033454, intron 1 of 5)	47967	NR_033454	328953	Mm.246768	NR_033454		Gm5095	A730092B10	predicted gene 5095	ncRNA
199	chr15	56692139	56693418	+	2.44	9.08	6.65	7.97e-10	intron (NR_002874, intron 1 of 3)	intron (NR_002874, intron 1 of 3)	1768	NM_008216	15117	Mm.5148	NM_008216	ENSMUSG00000022367	Has2	-	hyaluronan synthase 2	protein-coding
200	chr4	81912606	81913065	+	3.32	8.12	4.8	8.08e-10	Intergenic	Intergenic	-152545	NR_040659	545641	Mm.216028	NR_040659	ENSMUSG00000085022	Gm5860	EG545641	predicted gene 5860	ncRNA
201	chr3	132274723	132275304	+	3.22	8.25	5.03	8.15e-10	Intergenic	Intergenic	189721	NM_020265	56811	Mm.103593	NM_020265	ENSMUSG00000028031	Dkk2	-	dickkopf WNT signaling pathway inhibitor 2	protein-coding
202	chr5	107116616	107117439	+	2.55	8.9	6.35	8.57e-10	intron (NM_011578, intron 16 of 16)	intron (NM_011578, intron 16 of 16)	152466	NM_001271566	12545	Mm.20842	NM_009863	ENSMUSG00000029283	Cdc7	AI597260|Cdc7l1|muCdc7	cell division cycle 7 (S. cerevisiae)	protein-coding
203	chr11	109816912	109818047	+	3.16	8.76	5.6	8.65e-10	intron (NM_027038, intron 1 of 4)	intron (NM_027038, intron 1 of 4)	10567	NM_027038	69324	Mm.31700	NM_027038	ENSMUSG00000020617	1700012B07Rik	1700069D21Rik	RIKEN cDNA 1700012B07 gene	protein-coding
204	chr13	60507487	60508604	+	2.94	8.25	5.31	8.65e-10	Intergenic	Intergenic	-93902	NM_001285917	69635	Mm.24103	NM_029653	ENSMUSG00000021559	Dapk1	D13Ucla1|DAP-Kinase	death associated protein kinase 1	protein-coding
205	chr13	98654021	98654921	+	3.09	8.99	5.9	8.76e-10	Intergenic	Intergenic	-17061	NM_026685	68344	Mm.28766	NM_026685	ENSMUSG00000046082	Tmem174	0610009B10Rik|AA986094	transmembrane protein 174	protein-coding
206	chr17	32173210	32173596	+	3.15	8.12	4.97	9.91e-10	Intergenic	Intergenic	-6551	NM_008716	18131	Mm.439741	NM_008716	ENSMUSG00000038146	Notch3	AW229011|N3|hpbk	notch 3	protein-coding
207	chr10	6735852	6736390	+	3.16	7.83	4.66	1.06e-09	Intergenic	Intergenic	-22472	NM_001302796	18390	Mm.438000	NM_011013	ENSMUSG00000000766	Oprm1	M-OR-1|MOP-R|MOR-1|MOR-1O|Oprm|mor|muOR	opioid receptor, mu 1	protein-coding
208	chr13	32449715	32450466	+	2.96	8.69	5.73	1.06e-09	Intergenic	Intergenic	-111546	NM_146041	218138	Mm.247143	NM_146041	ENSMUSG00000038372	Gmds	BC031788|C87208	GDP-mannose 4, 6-dehydratase	protein-coding
209	chr5	100605648	100606441	+	2.83	8.61	5.78	1.06e-09	Intergenic	Intergenic	-33839	NM_139198	231507	Mm.34609	NM_139198	ENSMUSG00000029322	Plac8	C15|D5Wsu111e	placenta-specific 8	protein-coding
210	chr19	12486692	12487519	+	2.96	8.72	5.76	1.07e-09	intron (NM_172442, intron 2 of 8)	intron (NM_172442, intron 2 of 8)	14891	NM_172442	207521	Mm.247695	NM_172442	ENSMUSG00000039982	Dtx4	AI449438|BC044798|D930042H13|RNF155	deltex 4, E3 ubiquitin ligase	protein-coding
211	chr9	23070494	23071430	+	2.62	8.9	6.28	1.07e-09	Intergenic	MIRb|SINE|MIR	-152114	NM_028472	73230	Mm.335020	NM_028472	ENSMUSG00000031963	Bmper	3110056H04Rik|CV-2|Crim3|Cv2	BMP-binding endothelial regulator	protein-coding
212	chr16	29761404	29762655	+	2.43	9.94	7.51	1.07e-09	Intergenic	Intergenic	182695	NM_133752	74143	Mm.274285	NM_133752	ENSMUSG00000038084	Opa1	1200011N24Rik|AI225888|AI847218|lilr3|mKIAA0567	OPA1, mitochondrial dynamin like GTPase	protein-coding
213	chr1	153091683	153092820	+	2.2	9.6	7.4	1.07e-09	intron (NM_175460, intron 7 of 10)	intron (NM_175460, intron 7 of 10)	94196	NM_008485	16782	Mm.329272	NM_008485	ENSMUSG00000026479	Lamc2	AA589349	laminin, gamma 2	protein-coding
214	chr1	170056134	170056724	+	3.19	8.56	5.37	1.09e-09	intron (NM_022563, intron 1 of 16)	intron (NM_022563, intron 1 of 16)	32515	NM_022563	18214	Mm.229249	NM_022563	ENSMUSG00000026674	Ddr2	AW495251|Ntrkr3|tyro10	discoidin domain receptor family, member 2	protein-coding
215	chr16	69796283	69796854	+	-3.16	4.44	7.61	1.13e-09	non-coding (NR_130991, exon 2 of 2)	non-coding (NR_130991, exon 2 of 2)	3813	NR_130991	78110	Mm.211406	NR_130991	ENSMUSG00000107073	4930428D20Rik	Gm43265	RIKEN cDNA 4930428D20 gene	ncRNA
216	chr5	90029728	90030348	+	3.21	8.34	5.13	1.3e-09	Intergenic	Intergenic	-146704	NM_001081401	330119	Mm.133062	NM_177872	ENSMUSG00000043635	Adamts3	1100001H14Rik|6330442E02Rik	a disintegrin-like and metallopeptidase (reprolysin type) with thrombospondin type 1 motif, 3	protein-coding
217	chr11	50707182	50707689	+	3.53	8.35	4.82	1.34e-09	intron (NM_175643, intron 3 of 21)	intron (NM_175643, intron 3 of 21)	105350	NM_175643	216725	Mm.110597	NM_175643	ENSMUSG00000036545	Adamts2	ADAM-TS 2|ADAM-TS2|ADAMTS-2|PC I-NP|PCINP|pNPI	a disintegrin-like and metallopeptidase (reprolysin type) with thrombospondin type 1 motif, 2	protein-coding
218	chr8	66494441	66495125	+	3.01	8.85	5.83	1.34e-09	Intergenic	Intergenic	-8253	NM_025465	66282	Mm.294985	NM_025465	ENSMUSG00000025591	Tma16	1810029B16Rik	translation machinery associated 16	protein-coding
219	chr9	58303046	58304594	+	2.83	9.17	6.35	1.34e-09	intron (NM_010729, intron 1 of 6)	L3b|LINE|CR1	9392	NM_010729	16949	Mm.250492	NM_010729	ENSMUSG00000032334	Loxl1	Loxl	lysyl oxidase-like 1	protein-coding
220	chr5	113611495	113612346	+	2.62	9.26	6.64	1.37e-09	TTS (NM_001359060)	TTS (NM_001359060)	31683	NM_001359060	14747	Mm.5196	NM_008153	ENSMUSG00000042190	Cmklr1	ChemR23|DEZ|Gpcr27|mcmklr1	chemokine-like receptor 1	protein-coding
221	chr17	7680422	7681141	+	3.25	8.09	4.84	1.46e-09	Intergenic	Intergenic	124193	NM_001081416	68655	Mm.379161	NM_001081416	ENSMUSG00000071984	Fndc1	1110027O12Rik|1110051A18Rik|mKIAA1866	fibronectin type III domain containing 1	protein-coding
222	chr13	99124040	99125621	+	1.86	9.83	7.97	1.46e-09	Intergenic	Intergenic	-36909	NR_045495	69603	Mm.390632	NR_045495	ENSMUSG00000100410	2310020H05Rik	-	RIKEN cDNA 2310020H05 gene	ncRNA
223	chr3	135573034	135573974	+	2.92	8.88	5.96	1.55e-09	Intergenic	Intergenic	87893	NM_027288	110173	Mm.280536	NM_027288	ENSMUSG00000028164	Manba	2410030O07Rik|B930014J03Rik|Bmn	mannosidase, beta A, lysosomal	protein-coding
224	chr3	120064899	120065550	+	3.13	8.26	5.13	1.56e-09	Intergenic	Intergenic	-281836	NM_019550	56195	Mm.29966	NM_019550	ENSMUSG00000028134	Ptbp2	Ptb2|brPTB|nPTB	polypyrimidine tract binding protein 2	protein-coding
225	chr14	25786897	25787449	+	2.85	9.01	6.16	1.56e-09	Intergenic	Intergenic	-18317	NM_001101433	71918	Mm.41904	NM_001101433	ENSMUSG00000055538	Zcchc24	2310047A01Rik	zinc finger, CCHC domain containing 24	protein-coding
226	chr17	31688065	31688619	+	2.77	8.46	5.69	1.56e-09	Intergenic	Intergenic	10411	NM_013501	12954	Mm.1228	NM_013501	ENSMUSG00000024041	Cryaa	Acry-1|Crya-1|Crya1|DAcry-1|lop18	crystallin, alpha A	protein-coding
227	chr9	33930248	33930828	+	3.34	7.71	4.37	1.63e-09	Intergenic	Intergenic	-111833	NR_040744	77119	Mm.367930	NR_040744	ENSMUSG00000098758	7630403G23Rik	TH-cre|Tg(Th-cre)1Tmd	RIKEN cDNA 7630403G23 gene	ncRNA
228	chr8	26281890	26282949	+	2.76	8.4	5.64	1.63e-09	Intergenic	Intergenic	124250	NM_199042	73754	Mm.383241	NM_199042	ENSMUSG00000037214	Thap1	4833431A01Rik|AW490810	THAP domain containing, apoptosis associated protein 1	protein-coding
229	chr13	60071531	60072232	+	3.15	8.72	5.58	1.67e-09	intron (NR_046142, intron 1 of 2)	intron (NR_046142, intron 1 of 2)	42170	NR_046142	328263	Mm.123405	NR_046142	ENSMUSG00000114531	A530065N20Rik	A530065N20	RIKEN cDNA A530046M15 gene	ncRNA
230	chr2	159853847	159854704	+	3.12	8.74	5.62	1.67e-09	Intergenic	(GA)n|Simple_repeat|Simple_repeat	-93066	NR_040498	71081	Mm.383491	NR_040498	ENSMUSG00000085198	4933416E03Rik	-	RIKEN cDNA 4933416E03 gene	ncRNA
231	chr2	167172848	167173482	+	2.38	9.03	6.64	1.67e-09	intron (NM_008420, intron 1 of 1)	RMER6A|LTR|ERVK	15653	NM_008420	16500	Mm.205341	NM_008420	ENSMUSG00000050556	Kcnb1	Kcr1-1|Kv2.1|Shab	potassium voltage gated channel, Shab-related subfamily, member 1	protein-coding
232	chr18	56195926	56196274	+	3.73	7.62	3.89	1.7e-09	Intergenic	Lx4B|LINE|L1	-204240	NM_001360917	107022	Mm.24356	NM_026240	ENSMUSG00000001700	Gramd3	9030613F08Rik|9130427A09Rik|AW061306|Gramd2b|NS3TP2	GRAM domain containing 3	protein-coding
233	chr15	85172022	85172579	+	3.21	8.51	5.29	1.71e-09	Intergenic	Intergenic	-16168	NR_040360	100502602	Mm.390830	NR_040360	ENSMUSG00000115924	Gm19277	-	predicted gene, 19277	ncRNA
234	chr15	56678936	56679382	+	3.08	7.8	4.71	1.71e-09	intron (NM_008216, intron 2 of 3)	intron (NM_008216, intron 2 of 3)	-10785	NR_002874	594843	Mm.484850	NR_002874	ENSMUSG00000086541	Has2os	EG594843|Has2as|Hasnt	hyaluronan synthase 2, opposite strand	ncRNA
235	chr2	118028787	118029403	+	2.93	8.37	5.44	1.72e-09	intron (NR_126479, intron 7 of 9)	intron (NR_126479, intron 7 of 9)	82107	NR_126479	329496	Mm.235844	NR_126479	ENSMUSG00000087203	Gm13986	C230060E24	predicted gene 13986	ncRNA
236	chr2	75430103	75430623	+	3.4	7.94	4.53	1.82e-09	Intergenic	Intergenic	13816	NR_040635	77269	Mm.389278	NR_040635		9430019J16Rik	-	RIKEN cDNA 9430019J16 gene	ncRNA
237	chr12	30035103	30037089	+	2.79	9.51	6.72	1.86e-09	Intergenic	Intergenic	96528	NM_009417	22018	Mm.4991	NM_009417	ENSMUSG00000020673	Tpo	-	thyroid peroxidase	protein-coding
238	chr18	66383626	66384001	+	4.28	7.44	3.17	1.89e-09	Intergenic	Intergenic	-74791	NM_021451	58801	Mm.271878	NM_021451	ENSMUSG00000024521	Pmaip1	Noxa	phorbol-12-myristate-13-acetate-induced protein 1	protein-coding
239	chr3	102669909	102670746	+	2.83	8.43	5.6	1.91e-09	Intergenic	Intergenic	-64443	NM_027533	70747	Mm.27469	NM_027533	ENSMUSG00000027858	Tspan2	6330415F13Rik|B230119D02Rik|tspan-2	tetraspanin 2	protein-coding
240	chr1	155229463	155231085	+	2.1	9.61	7.51	1.97e-09	Intergenic	Intergenic	71571	NM_021433	58244	Mm.66264	NM_021433	ENSMUSG00000026470	Stx6	2310039E05Rik|2410005I16Rik|AA437559|AI415714|AI845861	syntaxin 6	protein-coding
241	chr10	58960143	58960611	+	3.35	7.78	4.43	2.02e-09	intron (NM_172788, intron 1 of 9)	intron (NM_172788, intron 1 of 9)	147018	NM_172788	237353	Mm.333078	NM_172788	ENSMUSG00000037990	Sh3rf3	4831416G18Rik|Igfbp5-ip|Sh3md4|Sh3rf31	SH3 domain containing ring finger 3	protein-coding
242	chr9	49605252	49606228	+	3.15	8.59	5.44	2.1e-09	intron (NM_010875, intron 1 of 15)	intron (NM_010875, intron 1 of 15)	87452	NR_029465	100036537	Mm.437541	NR_029465	ENSMUSG00000079564	Gm11149	-	predicted gene 11149	ncRNA
243	chr14	54443185	54444505	+	2.35	9.64	7.3	2.18e-09	Intergenic	Intergenic	12247	NM_008608	17387	Mm.280175	NM_008608	ENSMUSG00000000957	Mmp14	AI325305|MMP-X1|MT-MMP-1|MT1-MMP|sabe	matrix metallopeptidase 14 (membrane-inserted)	protein-coding
244	chr2	170321653	170322526	+	2.91	8.9	5.99	2.23e-09	Intergenic	Intergenic	-34272	NR_040610	73303	Mm.443297	NR_040610	ENSMUSG00000086999	Bcas1os2	1700040N02Rik	breast carcinoma amplified sequence 1, opposite strand 2	ncRNA
245	chr1	163167173	163167525	+	3.99	7.72	3.73	2.34e-09	Intergenic	Intergenic	-81679	NM_030071	78258	Mm.78368	NM_030071	ENSMUSG00000071890	Mroh9	4921528O07Rik|Armc11	maestro heat-like repeat family member 9	protein-coding
246	chr2	158215265	158216881	+	2.63	9.07	6.44	2.34e-09	intron (NM_001131021, intron 3 of 15)	intron (NM_001131021, intron 3 of 15)	13151	NM_001131021	228846	Mm.187574	NM_177657	ENSMUSG00000037813	D630003M21Rik	-	RIKEN cDNA D630003M21 gene	protein-coding
247	chr14	117130298	117130792	+	4.08	7.45	3.37	2.36e-09	intron (NM_011821, intron 1 of 8)	intron (NM_011821, intron 1 of 8)	205248	NM_001079844	23888	Mm.440025	NM_011821	ENSMUSG00000058571	Gpc6	-	glypican 6	protein-coding
248	chr12	32884121	32885413	+	2.54	9.09	6.56	2.36e-09	Intergenic	Intergenic	60651	NR_045032	100504486	Mm.440246	NR_045032		Gdap10	Gdap-ps	ganglioside-induced differentiation-associated-protein 10	ncRNA
249	chr3	41430002	41430689	+	2.59	8.89	6.3	2.45e-09	Intergenic	Intergenic	62854	NR_040385	78706	Mm.366094	NR_040385	ENSMUSG00000097639	Platr4	C430002E04Rik	pluripotency associated transcript 4	ncRNA
250	chr19	20492437	20493110	+	3.3	8.24	4.93	2.49e-09	promoter-TSS (NR_015502)	promoter-TSS (NR_015502)	58	NR_015502	320092	Mm.482524	NR_015502	ENSMUSG00000053279	E030003E18Rik	1700127G21Rik	RIKEN cDNA E030003E18 gene	ncRNA
251	chr3	28408804	28409402	+	3.26	8.52	5.26	2.5e-09	intron (NM_026910, intron 2 of 32)	A-rich|Low_complexity|Low_complexity	-10840	NR_130342	100628591		NR_130342	ENSMUSG00000092990	Mir466q	Mir446q|mmu-mir-466q|mu-mir-446q	microRNA 466q	ncRNA
252	chr9	58308310	58309081	+	3.07	8.47	5.4	2.57e-09	intron (NM_010729, intron 1 of 6)	intron (NM_010729, intron 1 of 6)	4517	NM_010729	16949	Mm.250492	NM_010729	ENSMUSG00000032334	Loxl1	Loxl	lysyl oxidase-like 1	protein-coding
253	chr10	127599749	127600802	+	2.82	9.64	6.82	2.57e-09	intron (NM_008512, intron 6 of 88)	intron (NM_008512, intron 6 of 88)	20873	NM_008512	16971	Mm.271854	NM_008512	ENSMUSG00000040249	Lrp1	A2mr|AI316852|CD91|Lrp|b2b1554Clo	low density lipoprotein receptor-related protein 1	protein-coding
254	chr19	42638681	42640005	+	2.85	9.08	6.23	2.58e-09	Intergenic	Intergenic	-26537	NM_053083	67573	Mm.178767	NM_053083	ENSMUSG00000025185	Loxl4	4833426I20Rik|Loxc	lysyl oxidase-like 4	protein-coding
255	chr13	51274540	51275119	+	3.26	8.39	5.13	2.62e-09	Intergenic	Intergenic	-71763	NR_132443	667728		NR_132443		Hist1h2al	EG667728	histone cluster 1, H2al	pseudo
256	chr13	112382668	112383567	+	3.07	8.87	5.8	2.67e-09	intron (NM_001168403, intron 11 of 11)	intron (NM_001168403, intron 11 of 11)	-80953	NM_010560	16195	Mm.4364	NM_010560	ENSMUSG00000021756	Il6st	5133400A03Rik|AA389424|BB405851|CD130|D13Ertd699e|gp130	interleukin 6 signal transducer	protein-coding
257	chr17	4199471	4200218	+	2.86	9.05	6.18	2.68e-09	Intergenic	Intergenic	-77742	NR_045462	78043	Mm.398313	NR_045462		4930548J01Rik	1700113K09Rik	RIKEN cDNA 4930548J01 gene	ncRNA
258	chr14	67242083	67242531	+	3.38	8.24	4.87	2.73e-09	intron (NM_001360202, intron 5 of 15)	intron (NM_001360202, intron 5 of 15)	7663	NM_001360202	13592	Mm.319947	NM_010095	ENSMUSG00000022053	Ebf2	D14Ggc1e|EBF-2|Mmot1|O/E-3|OE-3	early B cell factor 2	protein-coding
259	chr5	52616205	52617139	+	2.65	9.14	6.49	2.73e-09	intron (NR_045738, intron 1 of 2)	intron (NR_045738, intron 1 of 2)	2339	NR_045738	211001	Mm.261581	NR_045738	ENSMUSG00000052295	8030423F21Rik	-	RIKEN cDNA 8030423F21 gene	ncRNA
260	chr6	39528511	39529435	+	2.58	9.02	6.44	2.73e-09	intron (NM_172477, intron 1 of 18)	intron (NM_172477, intron 1 of 18)	28861	NM_172477	209773	Mm.440021	NM_172477	ENSMUSG00000038456	Dennd2a	B930096L08Rik|C130031G22|mKIAA1277	DENN/MADD domain containing 2A	protein-coding
261	chr13	16717097	16717682	+	3.19	8.39	5.2	2.88e-09	Intergenic	Intergenic	-693966	NR_155430	100503142	Mm.359204	NR_155430		B230303A05Rik	B230303A05|EG328191	U1 small nuclear ribonucleoprotein 1C pseudogene	pseudo
262	chr14	25245645	25246083	+	3.18	8.28	5.09	2.9e-09	Intergenic	Intergenic	-102623	NR_045718	75862	Mm.109191	NR_045718	ENSMUSG00000114916	4930572O13Rik	-	RIKEN cDNA 4930572O13 gene	ncRNA
263	chr5	134895163	134895673	+	2.68	8.21	5.54	2.9e-09	Intergenic	Intergenic	11315	NM_029681	76629	Mm.159750	NM_029681	ENSMUSG00000040576	Tmem270	1700111I05Rik|Wbscr28	transmembrane protein 270	protein-coding
264	chr2	173810124	173811433	+	2.57	8.69	6.12	2.92e-09	Intergenic	Intergenic	73207	NM_019806	56491	Mm.260456	NM_019806	ENSMUSG00000054455	Vapb	AI225786|AI840687|AI848259|D2Abb2e|R75548|VAP33b|Vamp33b	vesicle-associated membrane protein, associated protein B and C	protein-coding
265	chr1	45675767	45676293	+	3.07	7.98	4.91	2.93e-09	Intergenic	Intergenic	-119136	NM_028599	73674	Mm.270376	NM_028599	ENSMUSG00000025995	Wdr75	1300003A18Rik|2410118I19Rik|C77608	WD repeat domain 75	protein-coding
266	chr2	119018306	119019389	+	2.49	8.91	6.41	2.93e-09	3' UTR (NM_199310, exon 4 of 4)	3' UTR (NM_199310, exon 4 of 4)	10546	NM_199310	269336	Mm.292465	NM_199310	ENSMUSG00000039983	Ccdc32	Gm631	coiled-coil domain containing 32	protein-coding
267	chr4	4532173	4532720	+	2.98	8.42	5.44	2.99e-09	Intergenic	Lx8|LINE|L1	-2988	NM_001277919	622019	Mm.246123	NM_001277919		Gm11780	-	predicted gene 11780	protein-coding
268	chr7	135860675	135861969	+	2.61	8.85	6.24	2.99e-09	Intergenic	Intergenic	-144943	NM_001081117	17345	Mm.4078	NM_001081117	ENSMUSG00000031004	Mki67	D630048A14Rik|Ki-67|Ki67	antigen identified by monoclonal antibody Ki 67	protein-coding
269	chr14	62541738	62542140	+	4.03	7.29	3.26	3.1e-09	Intergenic	Intergenic	-13798	NM_001243857	629059	Mm.291864	NM_001243857	ENSMUSG00000035184	Fam124a	EG629059	family with sequence similarity 124, member A	protein-coding
270	chr11	47705258	47705873	+	3.2	8.58	5.38	3.1e-09	Intergenic	Intergenic	-326263	NM_011891	24052	Mm.338890	NM_011891	ENSMUSG00000020354	Sgcd	35kDa|delta-SG	sarcoglycan, delta (dystrophin-associated glycoprotein)	protein-coding
271	chr11	62934894	62935512	+	3.19	8.09	4.9	3.1e-09	Intergenic	Intergenic	-15990	NM_025496	66338	Mm.46166	NM_025496	ENSMUSG00000042200	Cdrt4	1700019I23Rik	CMT1A duplicated region transcript 4	protein-coding
272	chr13	82058273	82059358	+	2.59	9.16	6.56	3.1e-09	Intergenic	Intergenic	275568	NM_007684	12626	Mm.12481	NM_007684	ENSMUSG00000021537	Cetn3	MmCEN3	centrin 3	protein-coding
273	chr5	149403015	149404168	+	2.89	8.71	5.82	3.14e-09	Intergenic	Intergenic	-8158	NM_027519	70717	Mm.252139	NM_027519	ENSMUSG00000029659	Medag	6330406I15Rik|Awms3|MEDA-4|Meda4|mAWMS3	mesenteric estrogen dependent adipogenesis	protein-coding
274	chr9	43719316	43720389	+	2.23	9.11	6.88	3.14e-09	Intergenic	(TG)n|Simple_repeat|Simple_repeat	-24724	NM_021424	58235	Mm.335096	NM_021424	ENSMUSG00000032012	Nectin1	AI835281|AW549174|Cd111|HIgR|HveC|PRR|PRR1|Pvrl1|nectin-1	nectin cell adhesion molecule 1	protein-coding
275	chr2	110210369	110211354	+	2.61	9.5	6.89	3.22e-09	Intergenic	Intergenic	94864	NM_130452	170442	Mm.27335	NM_130452	ENSMUSG00000041660	Bbox1	AI874739	butyrobetaine (gamma), 2-oxoglutarate dioxygenase 1 (gamma-butyrobetaine hydroxylase)	protein-coding
276	chr5	113660809	113661363	+	2.42	8.59	6.17	3.27e-09	Intergenic	Intergenic	-10696	NM_008153	14747	Mm.5196	NM_008153	ENSMUSG00000042190	Cmklr1	ChemR23|DEZ|Gpcr27|mcmklr1	chemokine-like receptor 1	protein-coding
277	chr7	58676814	58677712	+	2.58	8.93	6.35	3.32e-09	intron (NM_009728, intron 1 of 20)	intron (NM_009728, intron 1 of 20)	19061	NM_009728	11982	Mm.135129	NM_009728	ENSMUSG00000025324	Atp10a	Atp10c|pfatp	ATPase, class V, type 10A	protein-coding
278	chr7	96712895	96713291	+	3.02	8.05	5.03	3.33e-09	intron (NM_011858, intron 8 of 32)	intron (NM_011858, intron 8 of 32)	88456	NR_045874	791381	Mm.402112	NR_045874	ENSMUSG00000053049	Gm15413	-	predicted gene 15413	ncRNA
279	chr7	98574727	98575449	+	3.09	8.69	5.6	3.34e-09	Intergenic	MIR3|SINE|MIR	80866	NM_001113379	434215	Mm.323057	NM_001113379	ENSMUSG00000090958	Lrrc32	AI426318|D11S833Eh|D7H11S833E|EG434215|Garp	leucine rich repeat containing 32	protein-coding
280	chr5	53429653	53430469	+	2.82	8.87	6.04	3.38e-09	Intergenic	Intergenic	-125718	NM_001080928	19664	Mm.209292	NM_009035	ENSMUSG00000039191	Rbpj	AI843960|CBF1|Igkjrb|Igkrsbp|RBP-J|RBP-J kappa|RBP-Jkappa|RBPjk|Rbpsuh	recombination signal binding protein for immunoglobulin kappa J region	protein-coding
281	chr17	83872681	83874291	+	2.02	10.03	8.02	3.43e-09	Intergenic	LTR81A|LTR|Gypsy	-19068	NR_155490	320021	Mm.379475	NR_155490		C430042M11Rik	-	RIKEN cDNA C430042M11 gene	ncRNA
282	chr3	82250678	82251260	+	3.1	8.49	5.4	3.44e-09	Intergenic	Intergenic	-105023	NM_021896	60596	Mm.143831	NM_021896	ENSMUSG00000033910	Gucy1a1	1200016O07Rik|GCS-alpha-1|GCS-alpha-3|Gucy1a3|sGC-alpha1	guanylate cyclase 1, soluble, alpha 1	protein-coding
283	chr10	13667074	13667894	+	2.85	8.64	5.79	3.44e-09	intron (NM_025446, intron 4 of 5)	intron (NM_025446, intron 4 of 5)	-114342	NM_019961	56535	Mm.282711	NM_019961	ENSMUSG00000019809	Pex3	1700014F15Rik|2810027F19Rik|2900010N04Rik	peroxisomal biogenesis factor 3	protein-coding
284	chr11	109884108	109885296	+	2.83	8.94	6.11	3.44e-09	Intergenic	Intergenic	38824	NR_045909	73257	Mm.250442	NR_045909	ENSMUSG00000087393	1700023C21Rik	-	RIKEN cDNA 1700023C21 gene	ncRNA
285	chr4	47136445	47138043	+	2.29	9.85	7.56	3.44e-09	Intergenic	Intergenic	45291	NM_172693	230145	Mm.132246	NM_172693	ENSMUSG00000039774	Galnt12	9130206E10|A630062B03Rik	polypeptide N-acetylgalactosaminyltransferase 12	protein-coding
286	chr1	90758028	90758868	+	2.77	8.78	6.01	3.52e-09	Intergenic	Intergenic	85523	NM_001243009	12835	Mm.7562	NM_009935	ENSMUSG00000048126	Col6a3	AI507288|Col6a-3	collagen, type VI, alpha 3	protein-coding
287	chr5	33234311	33235171	+	2.39	8.89	6.49	3.97e-09	Intergenic	Intergenic	-16503	NM_133903	100689	Mm.34694	NM_133903	ENSMUSG00000037379	Spon2	2310045I24Rik|AI504350|M-spondin|Mindin|Mspondin	spondin 2, extracellular matrix protein	protein-coding
288	chr4	55026071	55026643	+	2.55	8.57	6.02	4.13e-09	intron (NM_172867, intron 7 of 12)	intron (NM_172867, intron 7 of 12)	78412	NM_172867	242466	Mm.102904	NM_172867	ENSMUSG00000060206	Zfp462	6030417H05|9430078C22Rik|Gt4-2|Zfpip	zinc finger protein 462	protein-coding
289	chr15	11116308	11116754	+	3.12	8.52	5.4	4.21e-09	intron (NM_175501, intron 2 of 23)	intron (NM_175501, intron 2 of 23)	51758	NM_175501	239337	Mm.224825	NM_175501	ENSMUSG00000047497	Adamts12	ADAMTS-12|AI605170	a disintegrin-like and metallopeptidase (reprolysin type) with thrombospondin type 1 motif, 12	protein-coding
290	chr13	60400737	60401114	+	3.92	7.58	3.66	4.24e-09	Intergenic	L1MB7|LINE|L1	195454	NR_036449	100503759	Mm.38101	NM_177810	ENSMUSG00000050765	Gm5084	A030007L22|EG328264	predicted gene 5084	ncRNA
291	chr1	90502510	90503559	+	2.4	8.93	6.53	4.31e-09	Intergenic	Intergenic	-100391	NM_133805	108679	Mm.119177	NM_133805	ENSMUSG00000034432	Cops8	9430009J09Rik|AA408242|Csn8|Sgn8	COP9 signalosome subunit 8	protein-coding
292	chr9	105731902	105732647	+	2.74	8.44	5.7	4.67e-09	exon (NM_001102607, exon 24 of 37)	exon (NM_001102607, exon 24 of 37)	77374	NM_172927	245026	Mm.482507	NM_172927	ENSMUSG00000043719	Col6a6	E330019B14|E330026B02Rik	collagen, type VI, alpha 6	protein-coding
293	chr1	170694607	170695665	+	2.57	9.4	6.82	4.67e-09	Intergenic	Intergenic	50604	NM_177068	320078	Mm.287131	NM_177068	ENSMUSG00000038463	Olfml2b	1110018N05Rik|4832415H08Rik|AI467542	olfactomedin-like 2B	protein-coding
294	chr16	20756015	20756493	+	3.36	7.96	4.59	5.07e-09	Intergenic	RCHARR1|DNA|hAT-Charlie	-21743	NM_009379	21832	Mm.3943	NM_009379	ENSMUSG00000022847	Thpo	Mgdf|Ml|Mpllg|Tpo	thrombopoietin	protein-coding
295	chr14	117961031	117961684	+	2.82	8.43	5.61	5.21e-09	intron (NM_011821, intron 7 of 8)	intron (NM_011821, intron 7 of 8)	-7510	NR_105747	102465148		NR_105747	ENSMUSG00000098648	Mir6239	Gm28025|mmu-mir-6239	microRNA 6239	ncRNA
296	chr15	40358163	40359014	+	3.15	8.18	5.03	5.39e-09	Intergenic	Intergenic	168689	NR_046185	432945	Mm.321981	NR_046185	ENSMUSG00000056332	Gm16294	EG432945	predicted gene 16294	ncRNA
297	chr17	26492201	26492650	+	2.93	8.34	5.41	5.4e-09	Intergenic	Intergenic	16047	NM_013642	19252	Mm.239041	NM_013642	ENSMUSG00000024190	Dusp1	3CH134|MKP1|Ptpn16|U19515|erp|mkp-1	dual specificity phosphatase 1	protein-coding
298	chr2	52567415	52567895	+	2.97	8.89	5.92	5.42e-09	intron (NM_001037099, intron 2 of 13)	intron (NM_001037099, intron 2 of 13)	-9044	NM_001355059	12298	Mm.330223	NM_146123	ENSMUSG00000017412	Cacnb4	3110038O15Rik|Cchb4|lh	calcium channel, voltage-dependent, beta 4 subunit	protein-coding
299	chr4	118489365	118490928	+	-2.33	7.48	9.81	5.44e-09	promoter-TSS (NM_011587)	promoter-TSS (NM_011587)	-297	NM_011587	21846	Mm.4345	NM_011587	ENSMUSG00000033191	Tie1	D430008P04Rik|TIE|tie-1	tyrosine kinase with immunoglobulin-like and EGF-like domains 1	protein-coding
300	chr17	9227706	9228508	+	2.7	8.37	5.67	5.6e-09	Intergenic	L1MEg|LINE|L1	-60085	NR_027881	67791	Mm.158175	NR_027881	ENSMUSG00000097049	6530411M01Rik	-	RIKEN cDNA 6530411M01 gene	ncRNA
301	chr9	104130053	104130613	+	2.63	8.43	5.81	5.82e-09	Intergenic	Intergenic	-3690	NM_145700	252837	Mm.269254	NM_145700	ENSMUSG00000079355	Ackr4	A630091E18Rik|CCBP2|CCR11|CCX-CKR|CCX-CKR1|Ccrl1|Cmkbrl1|PPR1|VSHK1	atypical chemokine receptor 4	protein-coding
302	chr8	53780077	53781311	+	2.73	8.55	5.81	5.96e-09	Intergenic	Intergenic	-141629	NM_146208	234258	Mm.281749	NM_146208	ENSMUSG00000039396	Neil3	AI449477|BC034753|C85903	nei like 3 (E. coli)	protein-coding
303	chr6	92020955	92022348	+	2.18	9.47	7.29	5.96e-09	intron (NM_172731, intron 2 of 20)	intron (NM_172731, intron 2 of 20)	42686	NM_172731	232237	Mm.295740	NM_172731	ENSMUSG00000034037	Fgd5	C330025N11Rik|ZFYVE23|mFLJ00274	FYVE, RhoGEF and PH domain containing 5	protein-coding
304	chr2	31367079	31367711	+	3.22	8.27	5.05	6.17e-09	Intergenic	Intergenic	-102875	NM_007494	11898	Mm.3217	NM_007494	ENSMUSG00000076441	Ass1	AA408052|ASS|Ass-1|fold	argininosuccinate synthetase 1	protein-coding
305	chr18	55624041	55624859	+	2.58	8.84	6.26	6.21e-09	Intergenic	Intergenic	-631859	NM_001360787	269023	Mm.192984	NM_175751	ENSMUSG00000052713	Zfp608	4932417D18Rik|D430007A19Rik|Znf608	zinc finger protein 608	protein-coding
306	chr3	101393182	101394262	+	2.9	9.19	6.29	6.32e-09	intron (NM_207205, intron 2 of 10)	MLT1L|LTR|ERVL-MaLR	16597	NM_207205	78908	Mm.257997	NM_207205	ENSMUSG00000042035	Igsf3	1700016K10Rik|2810035F16Rik|4833439O17Rik|mKIAA0466	immunoglobulin superfamily, member 3	protein-coding
307	chr12	12993928	12995902	+	2.19	9.72	7.53	6.41e-09	Intergenic	Intergenic	-53079	NM_008709	18109	Mm.16469	NM_008709	ENSMUSG00000037169	Mycn	N-myc|Nmyc|Nmyc-1|Nmyc1|bHLHe37|c-nmyc	v-myc avian myelocytomatosis viral related oncogene, neuroblastoma derived	protein-coding
308	chr10	111893960	111894603	+	3.18	8	4.82	6.64e-09	Intergenic	Intergenic	-19905	NR_046029	629206	Mm.391444	NR_046029	ENSMUSG00000112533	Gm20758	-	predicted gene, 20758	ncRNA
309	chr2	173448487	173449574	+	2.73	8.83	6.1	6.65e-09	Intergenic	ORR1D1-int|LTR|ERVL-MaLR	-73562	NM_028158	72221	Mm.46132	NM_028158	ENSMUSG00000027518	1700021F07Rik	-	RIKEN cDNA 1700021F07 gene	protein-coding
310	chr17	33503516	33504351	+	2.5	9.29	6.78	6.65e-09	Intergenic	Intergenic	-20152	NM_001329153	224697	Mm.29304	NM_172619	ENSMUSG00000024299	Adamts10	9430006O18|AW045948|Adam-ts10|Adamts-10|Znmp	a disintegrin-like and metallopeptidase (reprolysin type) with thrombospondin type 1 motif, 10	protein-coding
311	chr19	53278387	53279432	+	2.48	8.77	6.28	6.65e-09	Intergenic	Intergenic	-23704	NR_036590	69319	Mm.57452	NR_036590		1700001K23Rik	-	RIKEN cDNA 1700001K23 gene	ncRNA
312	chr14	31462722	31463410	+	3.19	8.39	5.21	6.73e-09	Intergenic	MLT1B|LTR|ERVL-MaLR	-26966	NM_011894	24056	Mm.383198	NM_011894	ENSMUSG00000021892	Sh3bp5	AI606498|SH3BP-5|Sab	SH3-domain binding protein 5 (BTK-associated)	protein-coding
313	chr7	137714117	137714838	+	3.01	8.56	5.55	6.74e-09	Intergenic	Intergenic	276803	NR_033611	620016	Mm.388932	NR_033611	ENSMUSG00000100863	Gm12669	-	glutaredoxin 3 pseudogene	pseudo
314	chr11	34845417	34846100	+	3.05	8.44	5.39	6.81e-09	Intergenic	Intergenic	-12117	NM_027411	70385	Mm.194368	NM_027411	ENSMUSG00000069910	Spdl1	1700018I02Rik|2600001J17Rik|2810049B11Rik|AA409762|Ccdc99	spindle apparatus coiled-coil protein 1	protein-coding
315	chr12	76482190	76483070	+	3.25	8.69	5.44	7.06e-09	Intergenic	ORR1A2-int|LTR|ERVL-MaLR	38133	NR_028520	100041694	Mm.259350	NR_028520	ENSMUSG00000073000	Gm10451	-	predicted gene 10451	ncRNA
316	chr9	78750145	78750707	+	2.86	8.11	5.26	7.1e-09	Intergenic	Intergenic	134880	NM_153098	235505	Mm.32955	NM_153098	ENSMUSG00000046186	Cd109	9930012E15Rik|AI480638|GARP	CD109 antigen	protein-coding
317	chr3	37846187	37847146	+	2.76	8.88	6.12	7.13e-09	Intergenic	Intergenic	-52147	NR_040559	626410	Mm.389417	NR_040559	ENSMUSG00000106461	Gm20755	-	predicted gene, 20755	ncRNA
318	chr10	80301949	80303251	+	2.48	9.92	7.44	7.3e-09	intron (NM_011789, intron 3 of 13)	intron (NM_011789, intron 3 of 13)	780	NM_011789	23805	Mm.57247	NM_011789	ENSMUSG00000020135	Apc2	AI852447|APCL|R75424	adenomatosis polyposis coli 2	protein-coding
319	chr14	47958124	47958581	+	3.33	7.92	4.58	7.39e-09	Intergenic	Intergenic	59488	NR_045959	73961	Mm.390702	NR_045959	ENSMUSG00000115609	4930447J18Rik	4930425M13Rik	RIKEN cDNA 4930447J18 gene	ncRNA
320	chr15	85162656	85163382	+	3.02	8.55	5.53	7.43e-09	Intergenic	Intergenic	-6887	NR_040360	100502602	Mm.390830	NR_040360	ENSMUSG00000115924	Gm19277	-	predicted gene, 19277	ncRNA
321	chr14	40889688	40890121	+	3.22	8.26	5.04	7.46e-09	intron (NM_177816, intron 1 of 7)	intron (NM_177816, intron 1 of 7)	3061	NM_177816	328381	Mm.235694	NM_177816	ENSMUSG00000037833	Sh2d4b	A430109M18Rik|D030001E08	SH2 domain containing 4B	protein-coding
322	chr19	23353814	23354563	+	2.92	8.88	5.96	7.46e-09	intron (NM_174857, intron 7 of 13)	intron (NM_174857, intron 7 of 13)	-80291	NM_153808	226026	Mm.23267	NM_153808	ENSMUSG00000024943	Smc5	MLZ-453|SMC-5|Smc5l1|mKIAA0594|mSMC5	structural maintenance of chromosomes 5	protein-coding
323	chr10	126961622	126963529	+	2.39	9.48	7.09	7.61e-09	Intergenic	Intergenic	-16142	NM_001113470	52468	Mm.29490	NM_146012	ENSMUSG00000078429	Ctdsp2	AI586070|D10Ertd73e|OS-4|OS4|SCP2	CTD (carboxy-terminal domain, RNA polymerase II, polypeptide A) small phosphatase 2	protein-coding
324	chr11	79080032	79082098	+	2.31	10.27	7.96	7.61e-09	intron (NM_013571, intron 1 of 17)	intron (NM_013571, intron 1 of 17)	-21229	NM_001348207	16706	Mm.4745	NM_013571	ENSMUSG00000018334	Ksr1	AW492498|B-KSR1|D11Bhm183e|D11Bhm184e|Ksr|RSU2|hb|mKSR1	kinase suppressor of ras 1	protein-coding
325	chr7	25801992	25803859	+	2.2	10.63	8.43	7.75e-09	3' UTR (NM_028775, exon 9 of 9)	3' UTR (NM_028775, exon 9 of 9)	13605	NM_028775	74134	Mm.275188	NM_028775	ENSMUSG00000040703	Cyp2s1	1200011C15Rik|AU041727|C79779	cytochrome P450, family 2, subfamily s, polypeptide 1	protein-coding
326	chr16	15194907	15196370	+	2.24	9.34	7.1	7.76e-09	Intergenic	Intergenic	288992	NM_025769	66793	Mm.100270	NM_025769	ENSMUSG00000068617	Efcab1	4930449A16Rik|5430404L10Rik	EF-hand calcium binding domain 1	protein-coding
327	chr18	64380972	64381669	+	2.99	8.13	5.14	7.84e-09	intron (NM_194268, intron 1 of 1)	intron (NM_194268, intron 1 of 1)	40956	NM_194268	225631	Mm.234723	NM_194268	ENSMUSG00000045991	Onecut2	C730009D12|OC-2|Oc2	one cut domain, family member 2	protein-coding
328	chr10	13832467	13833452	+	2.27	8.76	6.49	7.84e-09	intron (NM_025446, intron 1 of 5)	intron (NM_025446, intron 1 of 5)	35998	NM_001347362	66253	Mm.45755	NM_025446	ENSMUSG00000019806	Aig1	1500031O19Rik|AV064870|AW413422|CGI-103	androgen-induced 1	protein-coding
329	chr1	77140853	77141319	+	3.4	7.97	4.57	7.85e-09	Intergenic	Intergenic	355682	NR_105770	102465180		NR_105770	ENSMUSG00000099141	Mir6352	Gm27481|mmu-mir-6352	microRNA 6352	ncRNA
330	chr12	9106410	9107092	+	3.21	8.13	4.92	7.85e-09	Intergenic	Intergenic	76754	NM_029321	75516	Mm.37581	NM_029321	ENSMUSG00000066637	Ttc32	1700013G20Rik	tetratricopeptide repeat domain 32	protein-coding
331	chr16	44493857	44494255	+	3.89	7.8	3.91	7.91e-09	intron (NM_172506, intron 8 of 18)	intron (NM_172506, intron 8 of 18)	64073	NR_037242	100526478		NR_037242	ENSMUSG00000093046	Mir3081	mir-3081|mmu-mir-3081	microRNA 3081	ncRNA
332	chr1	64753121	64753551	+	3.19	7.75	4.56	7.91e-09	Intergenic	Intergenic	-15586	NM_022721	14367	Mm.150813	NM_022721	ENSMUSG00000045005	Fzd5	5330434N09Rik|AI427138|Fz-5|Fz5|mFz5	frizzled class receptor 5	protein-coding
333	chr17	7625601	7626317	+	3.12	7.97	4.85	7.93e-09	Intergenic	Intergenic	179015	NM_001081416	68655	Mm.379161	NM_001081416	ENSMUSG00000071984	Fndc1	1110027O12Rik|1110051A18Rik|mKIAA1866	fibronectin type III domain containing 1	protein-coding
334	chr14	77343568	77344392	+	2.76	8.96	6.2	7.94e-09	intron (NM_001253759, intron 3 of 19)	intron (NM_001253759, intron 3 of 19)	162888	NR_033141	629678	Mm.390721	NM_001037935	ENSMUSG00000067973	Gm6994	EG629678	predicted gene 6994	ncRNA
335	chr12	64902217	64903662	+	2.55	9.37	6.82	8.13e-09	Intergenic	Intergenic	-14972	NM_001025605	217648	Mm.341586	NM_001025605	ENSMUSG00000047227	Gm527	-	predicted gene 527	protein-coding
336	chr12	47117429	47117931	+	3.19	8.29	5.1	8.15e-09	Intergenic	UCON29|DNA|PiggyBac?	-298905	NM_021361	664883	Mm.247195	NM_021361	ENSMUSG00000021047	Nova1	9430099M15Rik|G630039L02|Nova-1	neuro-oncological ventral antigen 1	protein-coding
337	chr5	111805182	111806510	+	2.77	8.94	6.16	8.15e-09	Intergenic	Intergenic	-44118	NR_045833	269683	Mm.136946	NM_207252	ENSMUSG00000085271	E130006D01Rik	Gm16018|Gm681	RIKEN cDNA E130006D01 gene	ncRNA
338	chr18	78297467	78298405	+	3.03	8.12	5.09	8.28e-09	intron (NM_207651, intron 3 of 21)	Lx|LINE|L1	-91496	NM_001110274	27411	Mm.44158	NM_030683	ENSMUSG00000024552	Slc14a2	UT-A1|UT-A3	solute carrier family 14 (urea transporter), member 2	protein-coding
339	chr11	82006745	82007410	+	2.38	8.83	6.45	8.48e-09	Intergenic	Intergenic	-28500	NM_011333	20296	Mm.290320	NM_011333	ENSMUSG00000035385	Ccl2	AI323594|HC11|JE|MCAF|MCP-1|MCP1|SMC-CF|Scya2|Sigje	chemokine (C-C motif) ligand 2	protein-coding
340	chr4	119707361	119708148	+	3.1	8.2	5.1	8.89e-09	Intergenic	MLT1O|LTR|ERVL-MaLR	-48809	NM_008191	14916	Mm.278	NM_008191	ENSMUSG00000032978	Guca2b	AV066530|Gcap2|Ugn	guanylate cyclase activator 2b (retina)	protein-coding
341	chr7	113961980	113962487	+	2.81	8.15	5.34	8.93e-09	intron (NM_145584, intron 6 of 15)	intron (NM_145584, intron 6 of 15)	155548	NM_025846	66922	Mm.276572	NM_025846	ENSMUSG00000055723	Rras2	2610016H24Rik|C86394|TC21	related RAS viral (r-ras) oncogene 2	protein-coding
342	chr11	32383676	32384488	+	2.31	9.11	6.81	8.95e-09	intron (NM_177364, intron 3 of 12)	intron (NM_177364, intron 3 of 12)	36271	NM_177364	268396	Mm.227616	NM_177364	ENSMUSG00000040711	Sh3pxd2b	G431001E03Rik|TSK4|fad49	SH3 and PX domains 2B	protein-coding
343	chr1	91823207	91823943	+	2.56	8.69	6.14	9.02e-09	intron (NM_007855, intron 1 of 1)	intron (NM_007855, intron 1 of 1)	22114	NM_007855	13345	Mm.9474	NM_007855	ENSMUSG00000007805	Twist2	Dermo1|bHLHa39	twist basic helix-loop-helix transcription factor 2	protein-coding
344	chr7	89099637	89100178	+	3.01	8.05	5.04	9.16e-09	Intergenic	Intergenic	238880	NM_028343	72759	Mm.208477	NM_028343	ENSMUSG00000039428	Tmem135	2810439K08Rik|AW319712|PMP52	transmembrane protein 135	protein-coding
345	chr4	87086835	87087523	+	3.19	8.29	5.1	9.36e-09	intron (NM_172426, intron 2 of 10)	intron (NM_172426, intron 2 of 10)	140784	NM_001110240	76376	Mm.490487	NM_172426	ENSMUSG00000037996	Slc24a2	2810021B17Rik|6330417K15Rik|AI847460|Nckx2	solute carrier family 24 (sodium/potassium/calcium exchanger), member 2	protein-coding
346	chr17	84421943	84422348	+	3.44	7.87	4.43	9.38e-09	intron (NM_183021, intron 21 of 37)	intron (NM_183021, intron 21 of 37)	44063	NM_183021	240174	Mm.246767	NM_177826	ENSMUSG00000024251	Thada	6530405K19|A930021O22|AU019899|BC052885|GITA	thyroid adenoma associated	protein-coding
347	chr2	44956087	44956704	+	2.59	8.46	5.87	9.57e-09	Intergenic	Intergenic	66782	NR_039591	100628598		NR_039591	ENSMUSG00000092679	Mir5129	mir-5129|mmu-mir-5129|mu-mir-5129	microRNA 5129	ncRNA
348	chr15	12427683	12428401	+	3.21	8.62	5.41	9.58e-09	intron (NM_001081064, intron 5 of 23)	intron (NM_001081064, intron 5 of 23)	106546	NM_025673	66629	Mm.157655	NM_025673	ENSMUSG00000022200	Golph3	4733401N08Rik|5730410D03Rik|AW413496	golgi phosphoprotein 3	protein-coding
349	chr11	19203813	19205109	+	2.59	8.97	6.39	9.8e-09	Intergenic	Intergenic	139186	NR_046037	74059	Mm.292321	NR_046037	ENSMUSG00000086025	4933406G16Rik	-	RIKEN cDNA 4933406G16 gene	ncRNA
350	chr7	73118559	73119317	+	2.81	8.83	6.02	9.9e-09	Intergenic	Intergenic	-16870	NR_046024	625243	Mm.261798	NR_046024	ENSMUSG00000108383	Gm6567	-	predicted gene 6567	ncRNA
351	chr14	33280797	33281266	+	3.48	7.7	4.23	9.97e-09	intron (NM_153800, intron 3 of 10)	intron (NM_153800, intron 3 of 10)	64208	NM_153800	239027	Mm.318350	NM_153800	ENSMUSG00000063506	Arhgap22	B230341L19Rik|RHOGAP2|p68RacGAP	Rho GTPase activating protein 22	protein-coding
352	chr1	114673846	114674543	+	2.69	8.29	5.6	9.97e-09	Intergenic	Intergenic	-1010943	NM_001077425	636808	Mm.101576	NM_001077425	ENSMUSG00000070695	Cntnap5a	Caspr5-1|EG636808	contactin associated protein-like 5A	protein-coding
353	chr12	82998568	82999108	+	2.87	7.92	5.06	1.01e-08	intron (NM_001310478, intron 3 of 17)	intron (NM_001310478, intron 3 of 17)	-59683	NR_046045	74283	Mm.398247	NR_046045	ENSMUSG00000100890	1700085C21Rik	-	RIKEN cDNA 1700085C21 gene	ncRNA
354	chr13	36528281	36529067	+	2.7	8.68	5.98	1.03e-08	intron (NM_001039189, intron 5 of 5)	intron (NM_001039189, intron 5 of 5)	205803	NM_153529	68404	Mm.232930	NM_153529	ENSMUSG00000039114	Nrn1	0710008J23Rik|Cpg15|Nrn	neuritin 1	protein-coding
355	chr6	83017158	83017829	+	2.4	9.32	6.92	1.04e-08	intron (NM_033079, intron 7 of 9)	intron (NM_033079, intron 7 of 9)	15978	NM_010070	13448	Mm.156	NM_010070	ENSMUSG00000068335	Dok1	AW557123|p62DOK	docking protein 1	protein-coding
356	chr14	106364787	106365187	+	3.04	7.98	4.93	1.05e-08	Intergenic	L2|LINE|L2	121533	NR_045938	73631	Mm.48862	NR_045938	ENSMUSG00000099794	1700128A07Rik	-	RIKEN cDNA 1700128A07 gene	ncRNA
357	chr4	111431257	111431644	+	3.43	7.33	3.91	1.06e-08	intron (NM_026279, intron 2 of 5)	intron (NM_026279, intron 2 of 5)	16444	NM_026279	67621	Mm.45533	NM_026279	ENSMUSG00000028545	Bend5	2310026E23Rik	BEN domain containing 5	protein-coding
358	chr1	45765581	45766124	+	3.15	8.11	4.96	1.09e-08	Intergenic	Intergenic	-29314	NM_028599	73674	Mm.270376	NM_028599	ENSMUSG00000025995	Wdr75	1300003A18Rik|2410118I19Rik|C77608	WD repeat domain 75	protein-coding
359	chr16	55571032	55571584	+	2.85	8.34	5.49	1.11e-08	Intergenic	Intergenic	76577	NR_039578	100628589		NR_039578	ENSMUSG00000093292	Mir5118	mmu-mir-5118|mu-mir-5118	microRNA 5118	ncRNA
360	chr4	41480163	41480626	+	3.1	8.21	5.11	1.12e-08	exon (NM_025539, exon 3 of 3)	exon (NM_025539, exon 3 of 3)	15246	NM_025539	66401	Mm.28574	NM_025539	ENSMUSG00000028443	Nudt2	2310051L06Rik|AA939917|APAH1	nudix (nucleoside diphosphate linked moiety X)-type motif 2	protein-coding
361	chr6	55444051	55445173	+	2.61	8.59	5.98	1.14e-08	Intergenic	Intergenic	-7366	NM_001025372	11517	Mm.44245	NM_007407	ENSMUSG00000029778	Adcyap1r1	2900024I10Rik|AI846590|PAC1|PAC1R|PACAP1-R	adenylate cyclase activating polypeptide 1 receptor 1	protein-coding
362	chr4	47293565	47294825	+	2.51	9.62	7.11	1.15e-08	intron (NM_009928, intron 28 of 39)	intron (NM_009928, intron 28 of 39)	-59027	NM_009370	21812	Mm.197552	NM_009370	ENSMUSG00000007613	Tgfbr1	ALK5|AU017191|Alk-5|ESK2|TGFR-1|TbetaR-I|TbetaRI	transforming growth factor, beta receptor I	protein-coding
363	chr9	62626951	62628023	+	2.68	8.86	6.17	1.19e-08	Intergenic	Intergenic	-50368	NM_176922	319480	Mm.34883	NM_176922	ENSMUSG00000032243	Itga11	4732459H24Rik	integrin alpha 11	protein-coding
364	chr11	35065795	35066345	+	2.95	7.97	5.02	1.21e-08	Intergenic	Intergenic	-55386	NM_011412	20564	Mm.478604	NM_011412	ENSMUSG00000056427	Slit3	Slil2|Slit1|b2b2362.1Clo	slit guidance ligand 3	protein-coding
365	chr8	122638908	122640327	+	2.28	9.6	7.32	1.23e-08	intron (NM_001109873, intron 5 of 11)	intron (NM_001109873, intron 5 of 11)	-16882	NM_001007462	382035	Mm.25449	NM_001007462	ENSMUSG00000069867	Pabpn1l	Gm1108|Pabpnl1|ePABP2	poly(A)binding protein nuclear 1-like	protein-coding
366	chr1	59457801	59458229	+	3.81	7.75	3.94	1.24e-08	Intergenic	Intergenic	-24132	NM_008057	14369	Mm.297906	NM_008057	ENSMUSG00000041075	Fzd7	Fz7	frizzled class receptor 7	protein-coding
367	chr16	45009427	45010106	+	3.01	8.91	5.9	1.24e-08	Intergenic	Intergenic	66088	NM_001128133	74603	Mm.297337	NM_027578	ENSMUSG00000036172	Cd200r3	4733401I18Rik|4833409J19Rik|AI505817|BB106877|mCD200RLb	CD200 receptor 3	protein-coding
368	chr5	77570333	77570859	+	2.76	8.39	5.62	1.24e-08	Intergenic	Intergenic	105108	NR_131050	69370	Mm.426881	NR_131050	ENSMUSG00000107232	1700017L05Rik	-	RIKEN cDNA 1700017L05 gene	ncRNA
369	chr17	62436090	62436491	+	3.72	7.19	3.47	1.26e-08	Intergenic	Lx7|LINE|L1	445027	NM_010109	13640	Mm.7978	NM_010109	ENSMUSG00000048915	Efna5	AL-1|AV158822|EFL-5|Ephrin-A5|Epl7|LERK-7|RAGS	ephrin A5	protein-coding
370	chr17	14771078	14771782	+	3.5	7.85	4.35	1.27e-08	Intergenic	Intergenic	-77168	NM_011581	21826	Mm.26688	NM_011581	ENSMUSG00000023885	Thbs2	TSP2|Thbs-2	thrombospondin 2	protein-coding
371	chr3	41498582	41499603	+	2.91	8.67	5.76	1.28e-08	Intergenic	Intergenic	-5893	NR_040385	78706	Mm.366094	NR_040385	ENSMUSG00000097639	Platr4	C430002E04Rik	pluripotency associated transcript 4	ncRNA
372	chr5	123326168	123327073	+	2.7	8.7	5.99	1.29e-08	Intergenic	Intergenic	-17828	NM_029850	77045	Mm.151960	NM_029850	ENSMUSG00000029438	Bcl7a	4432415N06Rik|AI448316	B cell CLL/lymphoma 7A	protein-coding
373	chr7	89669430	89669782	+	3.9	7.57	3.67	1.32e-08	intron (NM_181407, intron 1 of 13)	intron (NM_181407, intron 1 of 13)	36788	NM_181407	109264	Mm.334011	NM_181407	ENSMUSG00000030621	Me3	1700020C08Rik|B230207H15Rik	malic enzyme 3, NADP(+)-dependent, mitochondrial	protein-coding
374	chr3	19509166	19509803	+	2.89	8.8	5.91	1.32e-08	intron (NM_025489, intron 1 of 4)	intron (NM_025489, intron 1 of 4)	889	NM_025489	66326	Mm.45615	NM_025489	ENSMUSG00000027606	Dnajc5b	1700008A05Rik	DnaJ heat shock protein family (Hsp40) member C5 beta	protein-coding
375	chr4	5130636	5131139	+	2.8	8.4	5.6	1.32e-08	Intergenic	Intergenic	-337581	NM_177730	242291	Mm.218889	NM_177730	ENSMUSG00000066324	Impad1	1110001C20Rik|AA408880|AI451589|AL022796|B230207P20|Jaws|gPAPP	inositol monophosphatase domain containing 1	protein-coding
376	chr10	76664250	76665120	+	2.63	8.44	5.8	1.32e-08	Intergenic	Intergenic	-41055	NM_001347207	12834	Mm.1949	NM_146007	ENSMUSG00000020241	Col6a2	Col6a-2	collagen, type VI, alpha 2	protein-coding
377	chr11	116647153	116649619	+	2.19	10.73	8.54	1.33e-08	intron (NM_030206, intron 3 of 3)	intron (NM_030206, intron 3 of 3)	5927	NM_030206	114886	Mm.34598	NM_030206	ENSMUSG00000020810	Cygb	3110001K20Rik|HGb|Staap	cytoglobin	protein-coding
378	chr14	58943143	58943649	+	2.97	7.78	4.81	1.4e-08	Intergenic	Intergenic	199497	NM_026461	67932	Mm.65550	NM_026461	ENSMUSG00000021977	1700129C05Rik	-	RIKEN cDNA 1700129C05 gene	protein-coding
379	chr2	31339689	31340469	+	2.28	8.83	6.55	1.4e-08	Intergenic	Intergenic	94156	NM_019681	14299	Mm.249318	NM_019681	ENSMUSG00000062661	Ncs1	9430075O15Rik|A730032G13Rik|AI836659|Freq|Mfreq|NCS-1	neuronal calcium sensor 1	protein-coding
380	chr9	40639449	40640255	+	2.91	8.19	5.28	1.41e-08	Intergenic	Intergenic	-46112	NM_133733	71566	Mm.280560	NM_133733	ENSMUSG00000032024	Clmp	9030425E11Rik|ACAM|ASP5|AW557819	CXADR-like membrane protein	protein-coding
381	chr17	75027116	75028304	+	2.55	9.09	6.53	1.41e-08	intron (NM_019919, intron 2 of 33)	intron (NM_019919, intron 2 of 33)	22181	NM_019919	268977	Mm.269747	NM_019919	ENSMUSG00000001870	Ltbp1	9430031G15Rik|9830146M04|Ltbp-1|Ltbp1L|TGF-beta1-BP-1|Tgfb|b2b1000Clo	latent transforming growth factor beta binding protein 1	protein-coding
382	chr10	86389745	86390353	+	3.01	8.27	5.26	1.46e-08	intron (NM_013722, intron 4 of 13)	intron (NM_013722, intron 4 of 13)	89637	NM_011595	21859	Mm.4871	NM_011595	ENSMUSG00000020044	Timp3	Timp-3	tissue inhibitor of metalloproteinase 3	protein-coding
383	chr18	4839510	4840373	+	2.53	8.48	5.95	1.46e-08	intron (NR_045881, intron 5 of 9)	intron (NR_045881, intron 5 of 9)	27455	NR_045881	100038439	Mm.387569	NR_045881	ENSMUSG00000097043	Gm10556	-	predicted gene 10556	ncRNA
384	chr2	145500111	145500677	+	3.46	7.24	3.78	1.48e-08	intron (NM_053195, intron 3 of 16)	intron (NM_053195, intron 3 of 16)	54588	NM_001037929	627302	Mm.445953	NM_001037929		Gm14092	-	predicted gene 14092	protein-coding
385	chr15	36065888	36066537	+	3.12	7.81	4.69	1.49e-08	intron (NM_001195748, intron 14 of 27)	intron (NM_001195748, intron 14 of 27)	74188	NM_001195748	626596	Mm.321798	NM_001195748	ENSMUSG00000037627	Rgs22	-	regulator of G-protein signalling 22	protein-coding
386	chr13	38290267	38291088	+	2.71	8.34	5.63	1.53e-08	Intergenic	Intergenic	-55039	NM_007556	12161	Mm.385759	NM_007556	ENSMUSG00000039004	Bmp6	D13Wsu115e|Vgr1	bone morphogenetic protein 6	protein-coding
387	chr2	165613553	165614178	+	3.09	8.26	5.18	1.56e-08	intron (NM_001271963, intron 1 of 15)	intron (NM_001271963, intron 1 of 15)	-16480	NM_001271962	14049	Mm.282719	NM_010165	ENSMUSG00000017897	Eya2	Eab1	EYA transcriptional coactivator and phosphatase 2	protein-coding
388	chr16	94228717	94229750	+	2.76	8.62	5.86	1.56e-08	intron (NM_001360045, intron 6 of 10)	intron (NM_001360045, intron 6 of 10)	61058	NM_001360045	110948	Mm.30921	NM_139145	ENSMUSG00000040820	Hlcs	410I21.SP6|D16Jhu34	holocarboxylase synthetase (biotin- [propriony-Coenzyme A-carboxylase (ATP-hydrolysing)] ligase)	protein-coding
389	chr2	84774346	84776027	+	2.47	9.82	7.35	1.56e-08	intron (NM_009776, intron 1 of 7)	(GGA)n|Simple_repeat|Simple_repeat	243	NM_009776	12258	Mm.38888	NM_009776	ENSMUSG00000023224	Serping1	C1INH|C1nh	serine (or cysteine) peptidase inhibitor, clade G, member 1	protein-coding
390	chr2	158242909	158244017	+	2.77	8.69	5.92	1.58e-08	TTS (NR_106156)	TTS (NR_106156)	102	NR_106156	102466240		NR_106156	ENSMUSG00000098765	Mir7685	Gm27757|mmu-mir-7685	microRNA 7685	ncRNA
391	chr12	86056995	86057440	+	3.68	7.6	3.92	1.6e-08	3' UTR (NM_009368, exon 7 of 7)	3' UTR (NM_009368, exon 7 of 7)	21824	NM_009368	21809	Mm.3992	NM_009368	ENSMUSG00000021253	Tgfb3	TGF-beta-3|Tgfb-3	transforming growth factor, beta 3	protein-coding
392	chr3	65802846	65803302	+	3.21	8.44	5.24	1.6e-08	intron (NM_001166659, intron 10 of 12)	intron (NM_001166659, intron 10 of 12)	136846	NM_001166659	624866	Mm.296317	NM_001037923	ENSMUSG00000074579	Lekr1	EG546798|EG624866|Gm6534	leucine, glutamate and lysine rich 1	protein-coding
393	chr4	105271031	105271736	+	2.59	8.75	6.16	1.65e-08	Intergenic	Intergenic	114036	NM_080555	67916	Mm.348326	NM_080555	ENSMUSG00000028517	Plpp3	1110003O22Rik|2610002D05Rik|AV025606|D4Bwg0538e|D4Bwg1535e|Lpp3|Ppab2b|Ppap2b	phospholipid phosphatase 3	protein-coding
394	chr8	127833986	127834457	+	3.31	7.88	4.56	1.73e-08	Intergenic	Intergenic	444004	NR_105822	102465212		NR_105822	ENSMUSG00000099326	Mir21c	Gm28013|mmu-mir-21c	microRNA 21c	ncRNA
395	chrX	93016407	93016892	+	4.11	7.6	3.49	1.8e-08	Intergenic	Intergenic	-139505	NR_105038	69357	Mm.443312	NM_183280	ENSMUSG00000096153	BC061195	-	cDNA sequence BC061195	pseudo
396	chr3	49484570	49485791	+	2.8	8.65	5.85	1.8e-08	Intergenic	Intergenic	272136	NM_130448	73173	Mm.87246	NM_130448	ENSMUSG00000037892	Pcdh18	3110038E07Rik|BB095589|PCDH68L	protocadherin 18	protein-coding
397	chr17	5805949	5806454	+	2.5	8.9	6.41	1.8e-08	Intergenic	Intergenic	6711	NR_045080	78512	Mm.23696	NR_045079	ENSMUSG00000096965	3300005D01Rik	-	RIKEN cDNA 3300005D01 gene	ncRNA
398	chr9	33934116	33934704	+	3.61	7.66	4.05	1.81e-08	Intergenic	Intergenic	-107961	NR_040744	77119	Mm.367930	NR_040744	ENSMUSG00000098758	7630403G23Rik	TH-cre|Tg(Th-cre)1Tmd	RIKEN cDNA 7630403G23 gene	ncRNA
399	chr11	72734822	72735502	+	2.6	8.93	6.33	1.81e-08	intron (NM_009671, intron 7 of 24)	intron (NM_009671, intron 7 of 24)	45160	NM_009671	11736	Mm.10313	NM_009671	ENSMUSG00000020790	Ankfy1	Ankhzn|ZFYVE14|mKIAA1255	ankyrin repeat and FYVE domain containing 1	protein-coding
400	chr17	7678876	7679229	+	3.1	7.74	4.64	1.82e-08	Intergenic	Intergenic	125922	NM_001081416	68655	Mm.379161	NM_001081416	ENSMUSG00000071984	Fndc1	1110027O12Rik|1110051A18Rik|mKIAA1866	fibronectin type III domain containing 1	protein-coding
401	chr7	76776916	76777676	+	2.96	7.83	4.86	1.84e-08	intron (NM_001199224, intron 21 of 22)	intron (NM_001199224, intron 21 of 22)	547409	NM_001199224	244071	Mm.322829	NM_172902	ENSMUSG00000025754	Agbl1	Ccp4|D430020F16|EG244071|Nna1-l1	ATP/GTP binding protein-like 1	protein-coding
402	chrX	23556181	23556599	+	2.92	7.93	5.01	1.84e-08	Intergenic	Intergenic	-136661	NM_175180	72404	Mm.423	NM_175180	ENSMUSG00000036769	Wdr44	2610034K17Rik|RAB11BP|RPH11	WD repeat domain 44	protein-coding
403	chr2	50942391	50943554	+	2.45	8.62	6.18	1.84e-08	Intergenic	Intergenic	33288	NR_033595	227885	Mm.301654	NR_033595	ENSMUSG00000083270	Gm13498	-	heat shock protein 90 alpha (cytosolic), class B member 1 pseudogene	pseudo
404	chr1	80217862	80218687	+	-2.41	6.5	8.91	1.89e-08	Intergenic	Intergenic	-4330	NM_173425	241128	Mm.145511	NM_173425	ENSMUSG00000043230	Fam124b	A830043J08Rik	family with sequence similarity 124, member B	protein-coding
405	chr1	170057465	170058422	+	3.12	8.53	5.41	2e-08	intron (NM_022563, intron 1 of 16)	intron (NM_022563, intron 1 of 16)	31001	NM_022563	18214	Mm.229249	NM_022563	ENSMUSG00000026674	Ddr2	AW495251|Ntrkr3|tyro10	discoidin domain receptor family, member 2	protein-coding
406	chr13	89746545	89746852	+	3.08	7.75	4.66	2e-08	Intergenic	Intergenic	-4186	NM_019389	13003	Mm.158700	NM_019389	ENSMUSG00000021614	Vcan	5430420N07Rik|9430051N09|Cspg2|DPEAAE|NG2|PG-M|PG-M(V0)|PG-M(V1)|hdf	versican	protein-coding
407	chr6	87746845	87747253	+	3.04	7.81	4.77	2e-08	intron (NM_001159697, intron 2 of 7)	intron (NM_001159697, intron 2 of 7)	16180	NM_001159697	58229	Mm.333229	NM_021418	ENSMUSG00000068263	Efcc1	Ccdc48	EF hand and coiled-coil domain containing 1	protein-coding
408	chr13	95595441	95595771	+	3.45	7.7	4.26	2.12e-08	Intergenic	Intergenic	22860	NM_010169	14062	Mm.24816	NM_010169	ENSMUSG00000048376	F2r	AI482343|Cf2r|Par1|ThrR	coagulation factor II (thrombin) receptor	protein-coding
409	chr1	135531020	135531907	+	2.92	8.39	5.47	2.17e-08	intron (NM_173437, intron 3 of 28)	intron (NM_173437, intron 3 of 28)	53892	NM_173437	215690	Mm.34977	NM_173437	ENSMUSG00000009418	Nav1	9530089B19|9930003A20Rik|C230080M11Rik|Gm38399|Pomfil3|Unc53h1|mKIAA1151|steerin-1	neuron navigator 1	protein-coding
410	chr11	109887597	109888184	+	3.24	8.04	4.8	2.23e-08	Intergenic	Intergenic	42012	NR_045909	73257	Mm.250442	NR_045909	ENSMUSG00000087393	1700023C21Rik	-	RIKEN cDNA 1700023C21 gene	ncRNA
411	chr1	39393326	39394595	+	2.42	9.1	6.69	2.25e-08	intron (NM_001357521, intron 6 of 19)	intron (NM_001357521, intron 6 of 19)	26109	NM_053257	114641	Mm.379302	NM_053257	ENSMUSG00000073702	Rpl31	Dts	ribosomal protein L31	protein-coding
412	chr6	122513079	122513754	+	2.99	8.01	5.02	2.28e-08	promoter-TSS (NM_001347434)	promoter-TSS (NM_001347434)	-168	NM_015776	50530	Mm.41931	NM_015776	ENSMUSG00000030116	Mfap5	MAGP-2|MFAP-5	microfibrillar associated protein 5	protein-coding
413	chr1	130588692	130589024	+	2.96	7.78	4.82	2.32e-08	intron (NM_009581, intron 8 of 11)	intron (NM_009581, intron 8 of 11)	40748	NM_009581	22789	Mm.4644	NM_009581	ENSMUSG00000042554	Zp3r	AV264399|SP56	zona pellucida 3 receptor	protein-coding
414	chr10	70824234	70824883	+	2.46	8.8	6.34	2.38e-08	Intergenic	Intergenic	-168595	NR_045292	319646	Mm.483039	NR_045291	ENSMUSG00000037747	D630013N20Rik	-	RIKEN cDNA D630013N20 gene	ncRNA
415	chr12	70544934	70545541	+	2.95	7.84	4.89	2.44e-08	intron (NR_037248, intron 2 of 4)	intron (NR_037248, intron 2 of 4)	92083	NM_028339	72736	Mm.204670	NM_028339	ENSMUSG00000021072	Tmx1	2810425A04Rik|AI465319|Txndc1	thioredoxin-related transmembrane protein 1	protein-coding
416	chr11	48249239	48249733	+	2.93	8.31	5.38	2.44e-08	Intergenic	Intergenic	-550874	NM_008143	14694	Mm.5305	NM_008143	ENSMUSG00000020372	Rack1	AL033335|GB-like|Gnb2-rs1|Gnb2l1|p205	receptor for activated C kinase 1	protein-coding
417	chr1	138322695	138323023	+	3.7	7.31	3.61	2.47e-08	Intergenic	Intergenic	49121	NM_177397	338375	Mm.114424	NM_177397	ENSMUSG00000026394	Atp6v1g3	-	ATPase, H+ transporting, lysosomal V1 subunit G3	protein-coding
418	chr1	193086193	193087631	+	1.98	9.34	7.35	2.47e-08	Intergenic	Intergenic	43339	NM_145415	215193	Mm.173758	NM_145415	ENSMUSG00000016181	Diexf	AA408296|AW045375|Def	digestive organ expansion factor homolog (zebrafish)	protein-coding
419	chr7	110392585	110392924	+	2.97	7.77	4.8	2.5e-08	intron (NM_177324, intron 17 of 40)	RMER6A|LTR|ERVK	171051	NM_009302	20947	Mm.334144	NM_009302	ENSMUSG00000031015	Swap70	70kDa|AV235546	SWA-70 protein	protein-coding
420	chrX	106853476	106854181	+	3.52	7.58	4.06	2.54e-08	Intergenic	Intergenic	-13185	NM_199468	213436	Mm.85581	NM_199468	ENSMUSG00000047686	Rtl3	D430021I08Rik|Gm375|Mar3|Mart3|ZHC5|Zcchc5	retrotransposon Gag like 3	protein-coding
421	chr3	20829413	20829807	+	3.91	7.29	3.37	2.61e-08	Intergenic	Intergenic	-462433	NM_175086	11608	Mm.134863	NM_175086	ENSMUSG00000054988	Agtr1b	AT1B|AT2R1B|Agtr-1b|Angtr-1b	angiotensin II receptor, type 1b	protein-coding
422	chr12	81852920	81853385	+	3	8.15	5.15	2.61e-08	Intergenic	Intergenic	-6878	NM_018814	54604	Mm.86584	NM_018814	ENSMUSG00000021140	Pcnx	2900024E21Rik|3526401J03Rik|AF096286|AI327143|AI413187|Pcnx1|Pcnxl1	pecanex homolog	protein-coding
423	chr8	26811548	26812330	+	2.97	7.93	4.96	2.67e-08	Intergenic	MER121|DNA|TcMar?	12484	NR_045904	72316	Mm.490534	NR_045904	ENSMUSG00000100335	2310008N11Rik	-	RIKEN cDNA 2310008N11 gene	ncRNA
424	chr8	26268592	26269418	+	2.76	8.13	5.37	2.67e-08	Intergenic	Intergenic	110836	NM_199042	73754	Mm.383241	NM_199042	ENSMUSG00000037214	Thap1	4833431A01Rik|AW490810	THAP domain containing, apoptosis associated protein 1	protein-coding
425	chr15	34965900	34966252	+	2.91	7.74	4.83	2.68e-08	intron (NM_001357821, intron 9 of 11)	intron (NM_001357821, intron 9 of 11)	128027	NM_001271704	16539	Mm.71045	NM_181317	ENSMUSG00000050963	Kcns2	E130006J24Rik|Kv9.2	K+ voltage-gated channel, subfamily S, 2	protein-coding
426	chr16	5139773	5140132	+	3.48	7.86	4.38	2.69e-08	Intergenic	Intergenic	-7157	NM_001127725	665119	Mm.102072	NM_001127725	ENSMUSG00000091712	Sec14l5	-	SEC14-like lipid binding 5	protein-coding
427	chr6	55410472	55411372	+	2.73	8.43	5.71	2.69e-08	non-coding (NR_046179, exon 4 of 4)	non-coding (NR_046179, exon 4 of 4)	14035	NR_046179	330324	Mm.113703	NR_046179	ENSMUSG00000108228	6430584L05Rik	6430584L05	RIKEN cDNA 6430584L05 gene	ncRNA
428	chr1	156779999	156782797	+	1.52	10.26	8.74	2.72e-08	Intergenic	Intergenic	-57625	NM_028333	72713	Mm.389206	NM_028333	ENSMUSG00000033544	Angptl1	2810039D03Rik|ANG3|ANGPT3|ANGY|ARP1	angiopoietin-like 1	protein-coding
429	chr13	60291362	60291729	+	4.72	6.95	2.22	2.78e-08	Intergenic	Intergenic	86074	NR_036449	100503759	Mm.38101	NM_177810	ENSMUSG00000050765	Gm5084	A030007L22|EG328264	predicted gene 5084	ncRNA
430	chr11	105530551	105531146	+	2.9	8.1	5.2	2.79e-08	Intergenic	Intergenic	-59138	NM_181071	77097	Mm.22501	NM_175492	ENSMUSG00000053580	Tanc2	3526402J09Rik|5730590C14Rik	tetratricopeptide repeat, ankyrin repeat and coiled-coil containing 2	protein-coding
431	chr12	79948845	79949711	+	2.78	9.28	6.49	2.9e-08	Intergenic	Intergenic	-13014	NR_131074	77290	Mm.395042	NR_131073	ENSMUSG00000112765	9430078K24Rik	-	RIKEN cDNA 9430078K24 gene	ncRNA
432	chr5	90881037	90881341	+	3.48	7.51	4.03	2.93e-08	Intergenic	Intergenic	-10056	NM_008176	14825	Mm.21013	NM_008176	ENSMUSG00000029380	Cxcl1	Fsp|Gro1|KC|Mgsa|N51|Scyb1|gro	chemokine (C-X-C motif) ligand 1	protein-coding
433	chr14	23494293	23495035	+	2.72	8.65	5.94	2.93e-08	exon (NM_001253359, exon 14 of 31)	exon (NM_001253359, exon 14 of 31)	-400093	NR_033550	791307	Mm.364384	NR_033550	ENSMUSG00000068680	Gm10248	-	predicted gene 10248	ncRNA
434	chr13	54332018	54332857	+	2.79	8.74	5.95	2.95e-08	Intergenic	MIRc|SINE|MIR	-38912	NM_009946	12890	Mm.268902	NM_009946	ENSMUSG00000025867	Cplx2	921-L|AI413745|AW492120|Gm34843	complexin 2	protein-coding
435	chr14	67357139	67358694	+	2.65	9.14	6.49	3.01e-08	intron (NR_045961, intron 3 of 5)	intron (NR_045961, intron 3 of 5)	39826	NR_045961	73977	Mm.414915	NR_045961	ENSMUSG00000093472	4930438E09Rik	-	RIKEN cDNA 4930438E09 gene	ncRNA
436	chr17	79781692	79782092	+	3.08	8.03	4.95	3.04e-08	Intergenic	Intergenic	-66851	NM_009994	13078	Mm.214016	NM_009994	ENSMUSG00000024087	Cyp1b1	CP1B|P4501b1	cytochrome P450, family 1, subfamily b, polypeptide 1	protein-coding
437	chr9	61554502	61555003	+	2.59	8.18	5.59	3.09e-08	Intergenic	Intergenic	182386	NM_001083927	21887	Mm.24255	NM_009389	ENSMUSG00000032280	Tle3	2610103N05Rik|ESG|Grg3a|Grg3b|mKIAA1547	transducin-like enhancer of split 3	protein-coding
438	chr11	19601200	19602787	+	2.56	9.15	6.59	3.09e-08	Intergenic	Intergenic	-322449	NM_033523	114716	Mm.266627	NM_033523	ENSMUSG00000045671	Spred2	C79158	sprouty-related, EVH1 domain containing 2	protein-coding
439	chr17	44422975	44424023	+	2.73	8.71	5.98	3.1e-08	Intergenic	Intergenic	234927	NM_172621	224796	Mm.37666	NM_172621	ENSMUSG00000023959	Clic5	5730531E12Rik|B330005L24|Gm322|jbg|nmf318	chloride intracellular channel 5	protein-coding
440	chr2	31948345	31948924	+	2.78	8.32	5.54	3.13e-08	Intergenic	Intergenic	-1669	NM_145144	108897	Mm.24838	NM_145144	ENSMUSG00000001864	Aif1l	2810003C17Rik|AI043124|C87647|Iba2	allograft inflammatory factor 1-like	protein-coding
441	chr18	27023011	27023486	+	3.14	7.76	4.62	3.15e-08	Intergenic	MTEa|LTR|ERVL-MaLR	-1269091	NM_001362319	108013	Mm.266435	NM_133195	ENSMUSG00000024268	Celf4	A230070D14Rik|BRUNOL-4|Brul4|Brunol4|C130060B05Rik	CUGBP, Elav-like family member 4	protein-coding
442	chr2	21182791	21183217	+	3.08	8.09	5.01	3.17e-08	intron (NM_027728, intron 4 of 4)	intron (NM_027728, intron 4 of 4)	22361	NM_027728	71233	Mm.27658	NM_027728	ENSMUSG00000026679	Enkur	4933434I06Rik|AU016229	enkurin, TRPC channel interacting protein	protein-coding
443	chr15	59777110	59778102	+	2.29	9.53	7.24	3.19e-08	Intergenic	Intergenic	17353	NR_045076	100503021	Mm.402924	NR_045076	ENSMUSG00000115426	Gm19510	-	predicted gene, 19510	ncRNA
444	chr1	130511712	130512702	+	2.61	8.43	5.82	3.21e-08	Intergenic	Intergenic	-49463	NM_010016	13136	Mm.101591	NM_010016	ENSMUSG00000026399	Cd55	Daf|Daf-GPI|Daf1|GPI-DAF	CD55 molecule, decay accelerating factor for complement	protein-coding
445	chr12	82999226	83000649	+	2.16	9.35	7.19	3.27e-08	intron (NM_001310478, intron 3 of 17)	intron (NM_001310478, intron 3 of 17)	-60782	NR_046045	74283	Mm.398247	NR_046045	ENSMUSG00000100890	1700085C21Rik	-	RIKEN cDNA 1700085C21 gene	ncRNA
446	chr2	125530545	125531317	+	2.36	8.48	6.12	3.34e-08	Intergenic	UCON28b|Unknown|Unknown	-24493	NM_007993	14118	Mm.271644	NM_007993	ENSMUSG00000027204	Fbn1	AI536462|B430209H23|Fib-1|Tsk	fibrillin 1	protein-coding
447	chr14	54924540	54927328	+	1.89	10.08	8.19	3.36e-08	5' UTR (NM_010112, exon 1 of 6)	5' UTR (NM_010112, exon 1 of 6)	854	NM_010112	13644	Mm.236438	NM_010112	ENSMUSG00000022203	Efs	-	embryonal Fyn-associated substrate	protein-coding
448	chr17	90892340	90892682	+	3.54	7.25	3.71	3.37e-08	intron (NM_001346957, intron 3 of 18)	intron (NM_001346957, intron 3 of 18)	31342	NR_045463	78800	Mm.410772	NR_045463	ENSMUSG00000090160	4930480K15Rik	-	RIKEN cDNA 4930480K15 gene	ncRNA
449	chr17	68103347	68103838	+	3.37	8.26	4.89	3.41e-08	Intergenic	Lx8|LINE|L1	-99484	NM_172964	268970	Mm.9935	NM_172964	ENSMUSG00000024043	Arhgap28	AU044757|AW550892|E130310N06	Rho GTPase activating protein 28	protein-coding
450	chr9	63677538	63678641	+	2.86	8.8	5.93	3.41e-08	intron (NM_016769, intron 1 of 8)	intron (NM_016769, intron 1 of 8)	75443	NR_151671	66939	Mm.34338	NM_025857	ENSMUSG00000037257	Aagab	2310007F21Rik|p34	alpha- and gamma-adaptin binding protein	protein-coding
451	chr3	79936117	79936712	+	2.59	8.53	5.94	3.55e-08	intron (NM_133187, intron 2 of 3)	intron (NM_133187, intron 2 of 3)	50484	NM_133187	68659	Mm.427274	NM_133187	ENSMUSG00000027955	Fam198b	1110032E23Rik|2210419I08Rik|AV011458|Ened	family with sequence similarity 198, member B	protein-coding
452	chr12	30024343	30024982	+	2.43	8.87	6.44	3.55e-08	Intergenic	Intergenic	86626	NM_181395	69675	Mm.251774	NM_181395	ENSMUSG00000020674	Pxdn	2310075M15Rik|C85409|E330004E07|VPO1|mKIAA0230	peroxidasin	protein-coding
453	chr3	102275145	102275967	+	2.8	8.13	5.33	3.66e-08	intron (NR_040391, intron 2 of 3)	PB1D7|SINE|Alu	13151	NR_040391	319951	Mm.225196	NR_040391	ENSMUSG00000105891	A230001M10Rik	-	RIKEN cDNA A230001M10 gene	ncRNA
454	chr11	105291547	105293550	+	2.18	9.79	7.62	3.73e-08	promoter-TSS (NM_008626)	promoter-TSS (NM_008626)	-98	NM_008626	17534	Mm.235616	NM_008626	ENSMUSG00000020695	Mrc2	Endo180|mKIAA0709|uPARAP	mannose receptor, C type 2	protein-coding
455	chr9	116267127	116267937	+	3.13	7.58	4.45	3.78e-08	Intergenic	Intergenic	78352	NR_152204	100043817	Mm.404276	NR_152204		Gm4668	-	predicted gene 4668	ncRNA
456	chr13	73887203	73887944	+	2.48	8.68	6.2	3.78e-08	Intergenic	Intergenic	-39942	NM_001347535	72293	Mm.45506	NM_028186	ENSMUSG00000021567	Nkd2	2210403L10Rik|AW212591|mNkd2	naked cuticle 2	protein-coding
457	chr11	33745967	33746963	+	2.92	8.73	5.81	3.83e-08	intron (NM_001190885, intron 1 of 8)	MLT1D|LTR|ERVL-MaLR	97120	NM_027398	70357	Mm.252514	NM_027398	ENSMUSG00000053519	Kcnip1	KCHIP1|Kchip1.2	Kv channel-interacting protein 1	protein-coding
458	chr4	142271450	142272094	+	2.86	7.94	5.08	3.86e-08	Intergenic	Intergenic	-32371	NM_001109685	71529	Mm.255986	NM_144531	ENSMUSG00000040606	Kazn	2310007B04Rik|9030409G11Rik|AI256607|AI666764|AW061099|Kaz|Kazrin	kazrin, periplakin interacting protein	protein-coding
459	chr8	103808181	103809079	+	2.86	8.72	5.86	3.93e-08	Intergenic	Intergenic	204831	NR_045730	71058	Mm.67707	NR_045730	ENSMUSG00000110336	4933400L20Rik	-	RIKEN cDNA 4933400L20 gene	ncRNA
460	chr2	166280641	166281301	+	3.2	8.11	4.91	3.94e-08	intron (NR_033467, intron 1 of 2)	intron (NR_033467, intron 1 of 2)	7063	NR_033467	670775	Mm.384326	NR_033467	ENSMUSG00000084840	Gm11468	-	predicted gene 11468	ncRNA
461	chr2	144238020	144238836	+	2.36	9.34	6.98	3.95e-08	Intergenic	Intergenic	27774	NR_030762	100313519	Mm.453538	NR_030762	ENSMUSG00000077714	Snord17	MBI-43	small nucleolar RNA, C/D box 17	snoRNA
462	chr2	125484160	125484576	+	3.12	8.3	5.18	4.01e-08	intron (NM_007993, intron 2 of 65)	intron (NM_007993, intron 2 of 65)	22070	NM_007993	14118	Mm.271644	NM_007993	ENSMUSG00000027204	Fbn1	AI536462|B430209H23|Fib-1|Tsk	fibrillin 1	protein-coding
463	chr8	104022622	104023836	+	2.28	8.6	6.31	4.03e-08	Intergenic	Intergenic	-78396	NM_009868	12562	Mm.21767	NM_009868	ENSMUSG00000031871	Cdh5	7B4|AA408225|Cd144|VE-Cad|VECD|VEcad|Vec	cadherin 5	protein-coding
464	chr13	60936366	60937231	+	-2.43	6.96	9.39	4.03e-08	promoter-TSS (NM_007796)	promoter-TSS (NM_007796)	-173	NM_007796	13024	Mm.482089	NM_007796	ENSMUSG00000044258	Ctla2a	Ctla-2a	cytotoxic T lymphocyte-associated protein 2 alpha	protein-coding
465	chr7	90258718	90259255	+	3.2	8.01	4.81	4.35e-08	intron (NR_111924, intron 2 of 7)	intron (NR_111924, intron 2 of 7)	6446	NM_183293	75338	Mm.487222	NM_029256	ENSMUSG00000030617	Ccdc83	4930549K11Rik|4930554C01Rik|4932423M01Rik	coiled-coil domain containing 83	protein-coding
466	chr7	98503865	98505421	+	2.35	9.52	7.17	4.4e-08	Intergenic	Intergenic	10421	NM_001113379	434215	Mm.323057	NM_001113379	ENSMUSG00000090958	Lrrc32	AI426318|D11S833Eh|D7H11S833E|EG434215|Garp	leucine rich repeat containing 32	protein-coding
467	chr5	136160082	136160488	+	3.29	7.57	4.28	4.41e-08	intron (NM_178751, intron 2 of 2)	intron (NM_178751, intron 2 of 2)	10371	NM_178751	269717	Mm.308396	NM_178751	ENSMUSG00000039747	Orai2	A730041O15Rik|Tmem142b	ORAI calcium release-activated calcium modulator 2	protein-coding
468	chr4	5346128	5346605	+	3.2	7.78	4.58	4.41e-08	Intergenic	RMER13B|LTR|ERVK	-285962	NR_038183	73872	Mm.427301	NR_038183	ENSMUSG00000086066	4930423M02Rik	-	RIKEN cDNA 4930423M02 gene	ncRNA
469	chrX	97923942	97924639	+	3.05	8.3	5.25	4.47e-08	Intergenic	Intergenic	-224467	NM_013476	11835	Mm.39005	NM_013476	ENSMUSG00000046532	Ar	AW320017|Tfm	androgen receptor	protein-coding
470	chr11	85845400	85847454	+	2.25	9.62	7.37	4.47e-08	Intergenic	Intergenic	13812	NM_009324	21385	Mm.287052	NM_009324	ENSMUSG00000000093	Tbx2	-	T-box 2	protein-coding
471	chr18	42978539	42979261	+	2.59	8.42	5.83	4.55e-08	intron (NM_028392, intron 1 of 8)	intron (NM_028392, intron 1 of 8)	-79394	NR_073583	72930	Mm.26134	NM_027531	ENSMUSG00000024500	Ppp2r2b	2900026H06Rik|6330404L05Rik|E130009M08Rik|PP2A-PR55B|PR55-BETA|SCA12	protein phosphatase 2, regulatory subunit B, beta	protein-coding
472	chr1	4706071	4706740	+	-2.65	5.95	8.59	4.55e-08	Intergenic	Intergenic	79321	NR_033530	27395	Mm.182927	NM_025300	ENSMUSG00000033845	Mrpl15	HSPC145|MRP-L7|Rpml7	mitochondrial ribosomal protein L15	protein-coding
473	chr4	119901456	119902253	+	2.75	8.72	5.97	4.56e-08	intron (NM_010657, intron 1 of 8)	intron (NM_010657, intron 1 of 8)	87176	NM_010657	16656	Mm.302758	NM_010657	ENSMUSG00000028634	Hivep3	2900056N03Rik|A130075N07|AI848000|E030045D18Rik|KBP-1|KBP1|Krc|Rc|Schnurri-3|Shn3|Zas3	human immunodeficiency virus type I enhancer binding protein 3	protein-coding
474	chr11	70028406	70030205	+	2.03	9.64	7.61	4.57e-08	intron (NM_007864, intron 2 of 19)	intron (NM_007864, intron 2 of 19)	10700	NM_007864	13385	Mm.27256	NM_007864	ENSMUSG00000020886	Dlg4	Dlgh4|PSD-95|PSD95|SAP90|SAP90A	discs large MAGUK scaffold protein 4	protein-coding
475	chr2	168465752	168466598	+	2.58	8.57	5.99	4.58e-08	Intergenic	Intergenic	124190	NM_001291179	18019	Mm.116802	NM_010899	ENSMUSG00000027544	Nfatc2	AI607462|NF-ATc2|NF-ATp|NFAT1|NFAT1-D|Nfatp	nuclear factor of activated T cells, cytoplasmic, calcineurin dependent 2	protein-coding
476	chr13	101092354	101092766	+	2.99	7.85	4.86	4.7e-08	Intergenic	Intergenic	-139567	NR_046158	328324	Mm.402274	NR_046158	ENSMUSG00000114590	5930438M14Rik	5930438M14	RIKEN cDNA 5930438M14 gene	ncRNA
477	chr2	32342528	32343563	+	2.33	9.09	6.76	5.06e-08	intron (NM_010065, intron 1 of 20)	intron (NM_010065, intron 1 of 20)	10284	NR_125959	13429	Mm.44736	NM_010065	ENSMUSG00000026825	Dnm1	AI838169|Dnm|Ftfl|mKIAA4093	dynamin 1	protein-coding
478	chr8	88328558	88329340	+	2.56	8.41	5.85	5.1e-08	3' UTR (NM_007406, exon 28 of 28)	3' UTR (NM_007406, exon 28 of 28)	33242	NM_012047	26992	Mm.5400	NM_012047	ENSMUSG00000031660	Brd7	BP75|CELTIX1|Ptpn13ip	bromodomain containing 7	protein-coding
479	chr2	73462704	73464159	+	2.13	9.24	7.11	5.16e-08	intron (NM_153138, intron 1 of 7)	intron (NM_153138, intron 1 of 7)	-9542	NM_001289722	215280	Mm.223504	NM_153138	ENSMUSG00000075284	Wipf1	AI115543|D2Ertd120e|WIP|Waspip	WAS/WASL interacting protein family, member 1	protein-coding
480	chr8	120057040	120057689	+	3.04	8.01	4.97	5.17e-08	Intergenic	Intergenic	44108	NM_133967	102193	Mm.240076	NM_133967	ENSMUSG00000031823	Zdhhc7	AL024087|Gramp2	zinc finger, DHHC domain containing 7	protein-coding
481	chr3	143713167	143713780	+	3.02	7.91	4.89	5.26e-08	Intergenic	Intergenic	-1330	NR_040405	621809	Mm.360134	NR_040405	ENSMUSG00000105279	Gm6260	EG621809	predicted gene 6260	ncRNA
482	chr19	10012610	10013685	+	2.28	9.29	7.02	5.26e-08	intron (NM_001347429, intron 1 of 12)	intron (NM_001347429, intron 1 of 12)	-5047	NM_001347430	74760	Mm.281969	NM_144538	ENSMUSG00000024663	Rab3il1	1200014K04Rik|AI115013|C76746|Rab3ail1	RAB3A interacting protein (rabin3)-like 1	protein-coding
483	chr1	161983444	161983896	+	3.04	8.11	5.07	5.28e-08	Intergenic	Intergenic	-4034	NM_001204904	75368	Mm.108728	NM_001204904	ENSMUSG00000086277	4930558K02Rik	-	RIKEN cDNA 4930558K02 gene	protein-coding
484	chr12	41022487	41022856	+	2.95	7.63	4.68	5.28e-08	Intergenic	RMER6A|LTR|ERVK	-1419	NM_053122	93757	Mm.363813	NM_053122	ENSMUSG00000056899	Immp2l	AI853880|IMP2|Tg(HLA-A/H2-D)2Enge	IMP2 inner mitochondrial membrane peptidase-like (S. cerevisiae)	protein-coding
485	chr4	65548294	65548991	+	3.14	8.25	5.11	5.36e-08	intron (NM_207109, intron 17 of 22)	intron (NM_207109, intron 17 of 22)	-56344	NM_001161782	69807	Mm.22786	NM_053084	ENSMUSG00000051675	Trim32	1810045E12Rik|3f3|BBS11|Zfp117	tripartite motif-containing 32	protein-coding
486	chr8	103738284	103738789	+	2.71	7.87	5.17	5.36e-08	Intergenic	Intergenic	134737	NR_045730	71058	Mm.67707	NR_045730	ENSMUSG00000110336	4933400L20Rik	-	RIKEN cDNA 4933400L20 gene	ncRNA
487	chr11	73282886	73284782	+	2.33	9.17	6.83	5.38e-08	exon (NM_145099, exon 8 of 18)	exon (NM_145099, exon 8 of 18)	16214	NM_145099	246788	Mm.75196	NM_145099	ENSMUSG00000043029	Trpv3	1110036I10Rik|AI644701|Nh|VRL3	transient receptor potential cation channel, subfamily V, member 3	protein-coding
488	chr2	166335601	166336096	+	3.13	7.76	4.62	5.39e-08	Intergenic	Intergenic	61940	NR_033467	670775	Mm.384326	NR_033467	ENSMUSG00000084840	Gm11468	-	predicted gene 11468	ncRNA
489	chr5	134873840	134875128	+	1.68	9.4	7.73	5.4e-08	Intergenic	Intergenic	32249	NM_029681	76629	Mm.159750	NM_029681	ENSMUSG00000040576	Tmem270	1700111I05Rik|Wbscr28	transmembrane protein 270	protein-coding
490	chr3	87114654	87116508	+	2.04	9.16	7.13	5.42e-08	intron (NM_001170985, intron 2 of 15)	intron (NM_001170985, intron 2 of 15)	59166	NM_001170985	170643	Mm.89552	NM_130867	ENSMUSG00000041734	Kirrel	6720469N11Rik|Kirrel1|Neph1	kirre like nephrin family adhesion molecule 1	protein-coding
491	chr19	16403022	16403414	+	3.25	7.67	4.42	5.48e-08	Intergenic	Intergenic	-32449	NM_008137	14675	Mm.313181	NM_008137	ENSMUSG00000024697	Gna14	AU023208	guanine nucleotide binding protein, alpha 14	protein-coding
492	chr12	103673212	103673581	+	2.93	7.5	4.57	5.5e-08	intron (NM_001310472, intron 3 of 5)	intron (NM_001310472, intron 3 of 5)	3366	NM_001310472	194604		NM_001310472	ENSMUSG00000071179	Serpina16	Gm46	serine (or cysteine) peptidase inhibitor, clade A (alpha-1 antiproteinase, antitrypsin), member 16	protein-coding
493	chr4	120380614	120381492	+	2.01	10.01	8	5.56e-08	Intergenic	Intergenic	-24228	NM_001159630	29871	Mm.427014	NM_013883	ENSMUSG00000000085	Scmh1	AI315320|AI851618|Scml1|Scml3	sex comb on midleg homolog 1	protein-coding
494	chr4	57772822	57773489	+	3.01	8.53	5.52	5.58e-08	intron (NM_001304544, intron 6 of 8)	intron (NM_001304544, intron 6 of 8)	-72093	NM_001035532	11641	Mm.467752	NM_009649	ENSMUSG00000038729	Akap2	AA959716|AI649048|Akap-2|Akap-kl|B230340M18Rik|Prka2	A kinase (PRKA) anchor protein 2	protein-coding
495	chr14	79657883	79658797	+	2.88	8.14	5.26	5.58e-08	intron (NM_010701, intron 2 of 6)	intron (NM_010701, intron 2 of 6)	3843	NM_001310655	16840	Mm.46561	NM_010701	ENSMUSG00000022025	Cnmd	Bricd3|ChM-I|Chmd|Lect1	chondromodulin	protein-coding
496	chr8	104191225	104191961	+	2.79	8.47	5.68	5.62e-08	intron (NM_001141924, intron 2 of 4)	intron (NM_001141924, intron 2 of 4)	21080	NM_001141922	65115	Mm.41849	NM_001141922	ENSMUSG00000031872	Bean1	Bean	brain expressed, associated with Nedd4, 1	protein-coding
497	chrX	133629536	133629885	+	3.81	7.59	3.77	5.77e-08	intron (NM_001105245, intron 4 of 5)	intron (NM_001105245, intron 4 of 5)	-58070	NR_153117	102632590	Mm.403836	NR_153117	ENSMUSG00000096978	Gm26851	-	predicted gene, 26851	ncRNA
498	chr3	37128173	37128837	+	2.86	8.37	5.52	5.81e-08	Intergenic	Intergenic	-2551	NM_008366	16183	Mm.14190	NM_008366	ENSMUSG00000027720	Il2	Il-2	interleukin 2	protein-coding
499	chr2	78418616	78419441	+	3.17	8.36	5.18	5.85e-08	Intergenic	Intergenic	181481	NM_177843	329436	Mm.235448	NM_177843		Gm14461	A830093M07	predicted gene 14461	protein-coding
500	chr5	148704639	148705179	+	2.84	8.02	5.18	5.86e-08	Intergenic	Intergenic	-36931	NR_028285	70138	Mm.417834	NR_028285	ENSMUSG00000086494	2210417A02Rik	AV081004	RIKEN cDNA 2210417A02 gene	ncRNA
501	chr15	67901034	67901842	+	2.57	8.16	5.59	5.89e-08	Intergenic	Intergenic	357418	NM_001145888	380993	Mm.309526	NM_198644	ENSMUSG00000022335	Zfat	Gm922|Zfat1|Zfp406	zinc finger and AT hook domain containing	protein-coding
502	chr3	51943605	51944341	+	2.85	8.23	5.38	5.95e-08	intron (NM_001004176, intron 1 of 4)	intron (NM_001004176, intron 1 of 4)	161033	NM_001004176	433586	Mm.234972	NM_001004176	ENSMUSG00000061143	Maml3	AV234550|BC049812|Mam-2|mKIAA1816	mastermind like transcriptional coactivator 3	protein-coding
503	chr3	83451259	83451953	+	2.51	8.09	5.57	5.99e-08	Intergenic	Intergenic	122512	NR_036591	69460	Mm.389464	NR_036591	ENSMUSG00000101334	1700028M03Rik	-	RIKEN cDNA 1700028M03 gene	ncRNA
504	chr17	42956606	42957066	+	3.33	7.24	3.91	6e-08	Intergenic	Lx8|LINE|L1	-59719	NM_178589	94185	Mm.200792	NM_178589	ENSMUSG00000023915	Tnfrsf21	AA959878|DR6|R74815|TR7	tumor necrosis factor receptor superfamily, member 21	protein-coding
505	chr15	33907110	33907517	+	3.39	7.09	3.7	6.01e-08	Intergenic	Intergenic	-175406	NM_001357925	67154	Mm.130883	NM_026002	ENSMUSG00000022255	Mtdh	2610103J23Rik|3D3|3D3/Lyric|AEG-1|AV353288|D8Bwg1112e|Lyric	metadherin	protein-coding
506	chr12	80521909	80522485	+	2.73	8.03	5.3	6.06e-08	intron (NM_001081421, intron 1 of 14)	intron (NM_001081421, intron 1 of 14)	3207	NM_001081421	108760	Mm.308296	NM_134045	ENSMUSG00000021130	Galnt16	5730405L21Rik|AI415388|Galntl1|galNAc-T16|mpp-GalNAc-T16	polypeptide N-acetylgalactosaminyltransferase 16	protein-coding
507	chr11	31563682	31565431	+	1.79	9.76	7.98	6.06e-08	Intergenic	Intergenic	107306	NM_001024919	69556	Mm.34183	NM_001024919	ENSMUSG00000044502	Bod1	2310022M17Rik|BOD2.1|Fam44b	biorientation of chromosomes in cell division 1	protein-coding
508	chr13	60427580	60428429	+	2.95	8.44	5.5	6.13e-08	Intergenic	Intergenic	-173943	NM_001285917	69635	Mm.24103	NM_029653	ENSMUSG00000021559	Dapk1	D13Ucla1|DAP-Kinase	death associated protein kinase 1	protein-coding
509	chr2	151938541	151939372	+	2.12	8.71	6.59	6.13e-08	exon (NM_009641, exon 7 of 9)	exon (NM_009641, exon 7 of 9)	27749	NM_009641	11602	Mm.189536	NM_009641	ENSMUSG00000027460	Angpt4	ANG-3|ANG-4|Agpt4|Ang3	angiopoietin 4	protein-coding
510	chr1	17570154	17570909	+	2.9	8.37	5.47	6.19e-08	Intergenic	Intergenic	-31370	NM_053191	94227	Mm.442452	NM_053191	ENSMUSG00000067780	Pi15	P24TI|P25TI|PI-15|SugarCrisp	peptidase inhibitor 15	protein-coding
511	chr1	35869375	35870057	+	2.81	8.4	5.59	6.37e-08	Intergenic	Intergenic	-198684	NM_015818	50785	Mm.213566	NM_015818	ENSMUSG00000045216	Hs6st1	6Ost1	heparan sulfate 6-O-sulfotransferase 1	protein-coding
512	chr11	43617717	43618820	+	2.28	8.7	6.43	6.38e-08	Intergenic	Intergenic	-16706	NM_008375	16204	Mm.142716	NM_008375	ENSMUSG00000020405	Fabp6	GT|I-15P|I-BABP|ILBP|ILBP3|Illbp	fatty acid binding protein 6, ileal (gastrotropin)	protein-coding
513	chrX	68507674	68508180	+	4.21	7.12	2.91	6.47e-08	Intergenic	Intergenic	170472	NR_033481	100038638	Mm.368431	NR_033481	ENSMUSG00000096946	Fmr1os	Asfmr1|Gm10474	fragile X mental retardation syndrome 1, opposite strand	ncRNA
514	chr7	66528855	66529259	+	2.74	7.93	5.19	6.47e-08	Intergenic	Intergenic	-101580	NM_053080	56847	Mm.140988	NM_053080	ENSMUSG00000015134	Aldh1a3	ALDH6|RALDH3|V1	aldehyde dehydrogenase family 1, subfamily A3	protein-coding
515	chr7	45144254	45145452	+	2.47	9.04	6.57	6.6e-08	intron (NM_145954, intron 13 of 16)	intron (NM_145954, intron 13 of 16)	-8421	NR_102725	14256	Mm.1658	NM_013520	ENSMUSG00000110206	Flt3l	Flt3lg|Ly72L	FMS-like tyrosine kinase 3 ligand	protein-coding
516	chr5	146318116	146319038	+	3.01	8.38	5.37	6.63e-08	Intergenic	Intergenic	-66429	NM_145155	245880	Mm.472750	NM_145155	ENSMUSG00000029636	Wasf3	Scar3|Wave3	WAS protein family, member 3	protein-coding
517	chr1	74088397	74089073	+	2.8	8.2	5.4	6.63e-08	intron (NM_001289895, intron 1 of 32)	intron (NM_001289895, intron 1 of 32)	35712	NM_027884	21961	Mm.309975	NM_027884	ENSMUSG00000055322	Tns1	1110018I21Rik|1200014E20Rik|AI648117|E030018G17Rik|E030037J05Rik|Tns	tensin 1	protein-coding
518	chr4	84004193	84004714	+	3.07	7.6	4.53	6.66e-08	Intergenic	Intergenic	40426	NR_130998	78238	Mm.243903	NR_130998	ENSMUSG00000085217	6030471H07Rik	-	RIKEN cDNA 6030471H07 gene	ncRNA
519	chr1	167292337	167292890	+	2.8	8.15	5.35	6.73e-08	Intergenic	LTR16B2|LTR|ERVL	2488	NR_105765	102465177		NR_105765	ENSMUSG00000098379	Mir6347	Gm27863|mmu-mir-6347	microRNA 6347	ncRNA
520	chr11	94928548	94930334	+	1.56	9.96	8.4	6.77e-08	Intergenic	Intergenic	-6783	NM_007742	12842	Mm.277735	NM_007742	ENSMUSG00000001506	Col1a1	Col1a-1|Cola-1|Cola1|Mov-13|Mov13	collagen, type I, alpha 1	protein-coding
521	chr2	124522221	124522878	+	2.91	8.05	5.15	6.79e-08	intron (NM_001290997, intron 5 of 20)	intron (NM_001290997, intron 5 of 20)	-87747	NM_199238	214968	Mm.330536	NM_172537	ENSMUSG00000027200	Sema6d	1110067B02Rik|AA409156|D330011G23|mKIAA1479	sema domain, transmembrane domain (TM), and cytoplasmic domain, (semaphorin) 6D	protein-coding
522	chr10	90942016	90942653	+	3.04	8.09	5.05	6.8e-08	intron (NM_181398, intron 7 of 9)	intron (NM_181398, intron 7 of 9)	112491	NM_001347053	77531	Mm.440605	NM_181398	ENSMUSG00000058589	Anks1b	AIDA-1|AIDA-1b|C030032C09Rik|E530015N03Rik|EB-1|Gm10937|Gm1555	ankyrin repeat and sterile alpha motif domain containing 1B	protein-coding
523	chr10	93130456	93131001	+	2.62	8	5.38	6.94e-08	Intergenic	Intergenic	-30148	NM_146239	237459	Mm.217404	NM_146239	ENSMUSG00000020015	Cdk17	6430598J10Rik|Pctk2	cyclin-dependent kinase 17	protein-coding
524	chr2	110274100	110274567	+	3.65	8.02	4.37	7.04e-08	intron (NM_130452, intron 4 of 6)	MLT1H|LTR|ERVL-MaLR	31392	NM_130452	170442	Mm.27335	NM_130452	ENSMUSG00000041660	Bbox1	AI874739	butyrobetaine (gamma), 2-oxoglutarate dioxygenase 1 (gamma-butyrobetaine hydroxylase)	protein-coding
525	chr1	84225618	84226086	+	3.31	8.03	4.71	7.04e-08	intron (NM_001003948, intron 1 of 2)	intron (NM_001003948, intron 1 of 2)	-6891	NR_105771	102465181		NR_105771	ENSMUSG00000098851	Mir6353	Gm27391|mmu-mir-6353	microRNA 6353	ncRNA
526	chr7	81109503	81111169	+	1.43	10.57	9.14	7.13e-08	Intergenic	Intergenic	-4463	NM_001004184	434203	Mm.389909	NM_001004184	ENSMUSG00000025726	Slc28a1	Cnt1	solute carrier family 28 (sodium-coupled nucleoside transporter), member 1	protein-coding
527	chr5	113799749	113800885	+	2.23	8.86	6.63	7.17e-08	promoter-TSS (NM_146162)	promoter-TSS (NM_146162)	35	NM_146162	231633	Mm.41681	NM_146162	ENSMUSG00000054675	Tmem119	AW208946|BC025600|obif	transmembrane protein 119	protein-coding
528	chr5	39128757	39129277	+	2.96	7.76	4.8	7.55e-08	Intergenic	Intergenic	-252324	NM_013748	27278	Mm.440845	NM_013748	ENSMUSG00000039315	Clnk	MIST	cytokine-dependent hematopoietic cell linker	protein-coding
529	chr11	95369624	95370664	+	2.23	9.45	7.22	7.58e-08	intron (NM_172543, intron 2 of 7)	intron (NM_172543, intron 2 of 7)	-14712	NM_001357797	110172	Mm.4593	NM_016752	ENSMUSG00000020873	Slc35b1	UGTrel1|Ugalt2	solute carrier family 35, member B1	protein-coding
530	chr4	137941837	137942458	+	2.96	8.44	5.48	7.63e-08	intron (NM_199307, intron 9 of 19)	PB1D10|SINE|Alu	-51309	NM_001256198	230861	Mm.268903	NM_172703	ENSMUSG00000028760	Eif4g3	1500002J22Rik|4930523M17Rik|G1-419-52|eIF4GII|repro8	eukaryotic translation initiation factor 4 gamma, 3	protein-coding
531	chr13	41957937	41958304	+	3.24	7.81	4.57	7.73e-08	Intergenic	Intergenic	92205	NR_033545	100038577	Mm.387093	NR_033545	ENSMUSG00000113856	Gm10790	-	predicted gene 10790	ncRNA
532	chrX	159697001	159697465	+	3.97	7.53	3.57	7.77e-08	intron (NM_001135727, intron 2 of 17)	intron (NM_001135727, intron 2 of 17)	-11368	NM_021389	58194	Mm.286495	NM_021389	ENSMUSG00000040990	Sh3kbp1	1200007H22Rik|1700125L08Rik|5830464D22Rik|AI447724|Cin85|IN85|Ruk|Seta	SH3-domain kinase binding protein 1	protein-coding
533	chr3	102678512	102679013	+	3.1	7.72	4.62	7.77e-08	Intergenic	Intergenic	-56008	NM_027533	70747	Mm.27469	NM_027533	ENSMUSG00000027858	Tspan2	6330415F13Rik|B230119D02Rik|tspan-2	tetraspanin 2	protein-coding
534	chr13	44468817	44469844	+	2.88	8.77	5.89	7.77e-08	Intergenic	Intergenic	29603	NR_045489	69491	Mm.392410	NR_045489	ENSMUSG00000098144	1700029N11Rik	-	RIKEN cDNA 1700029N11 gene	ncRNA
535	chr12	102302739	102303369	+	2.32	8.77	6.45	7.77e-08	intron (NM_001161365, intron 1 of 9)	intron (NM_001161365, intron 1 of 9)	19413	NM_001161365	217835	Mm.24145	NM_177620	ENSMUSG00000044456	Rin3	6430500K07|C86933	Ras and Rab interactor 3	protein-coding
536	chr2	35273042	35274255	+	2.21	9.13	6.92	7.77e-08	intron (NM_001206367, intron 2 of 17)	intron (NM_001206367, intron 2 of 17)	6904	NM_001206369	227753	Mm.443	NM_146120	ENSMUSG00000026879	Gsn	ADF	gelsolin	protein-coding
537	chr7	16912315	16912877	+	2.99	8.17	5.18	7.78e-08	Intergenic	Intergenic	6106	NM_008967	19222	Mm.287572	NM_008967	ENSMUSG00000043017	Ptgir	IP|PGI2	prostaglandin I receptor (IP)	protein-coding
538	chr18	38794200	38794816	+	2.73	8.65	5.91	8.09e-08	Intergenic	Intergenic	-97948	NM_001033789	545253	Mm.244585	NM_001033789	ENSMUSG00000036452	Gm5820	EG545253	predicted gene 5820	protein-coding
539	chr6	12471028	12471441	+	3.82	7.04	3.23	8.36e-08	intron (NM_001164805, intron 4 of 26)	intron (NM_001164805, intron 4 of 26)	278019	NM_001164805	330267	Mm.11989	NM_001164805	ENSMUSG00000032625	Thsd7a	Gm837	thrombospondin, type I, domain containing 7A	protein-coding
540	chr6	34750688	34751105	+	3.58	7.85	4.27	8.49e-08	intron (NM_145575, intron 3 of 11)	intron (NM_145575, intron 3 of 11)	-29536	NM_001289657	76223	Mm.150047	NM_178630	ENSMUSG00000038836	Agbl3	2900053G10Rik|4930431N21Rik|6530406M24Rik|CCP3	ATP/GTP binding protein-like 3	protein-coding
541	chr7	46746248	46746995	+	2.76	8.36	5.6	8.49e-08	Intergenic	Intergenic	-3641	NM_001357493	20208	Mm.148800	NM_009117	ENSMUSG00000074115	Saa1	Saa-1|Saa2	serum amyloid A 1	protein-coding
542	chr15	68605845	68606734	+	2.17	9.13	6.96	8.52e-08	Intergenic	Intergenic	-265000	NR_029718	387228		NR_029718	ENSMUSG00000065437	Mir30d	Mirn30d|mir-30d|mmu-mir-30d	microRNA 30d	ncRNA
543	chr1	78338072	78338720	+	3.03	8.36	5.33	8.66e-08	intron (NM_001004173, intron 1 of 4)	intron (NM_001004173, intron 1 of 4)	28050	NM_001004173	433323	Mm.276248	NM_001004173	ENSMUSG00000032908	Sgpp2	SPPase2|Spp2	sphingosine-1-phosphate phosphotase 2	protein-coding
544	chr13	85629587	85630181	+	2.77	7.55	4.78	8.66e-08	Intergenic	Intergenic	-340398	NM_145452	218397	Mm.259653	NM_145452	ENSMUSG00000021549	Rasa1	Gap|RasGAP|Rasa	RAS p21 protein activator 1	protein-coding
545	chr3	126831368	126832067	+	2.29	8.75	6.45	8.68e-08	intron (NM_001025438, intron 14 of 18)	intron (NM_001025438, intron 14 of 18)	111669	NM_001034168	109676	Mm.220242	NM_178655	ENSMUSG00000032826	Ank2	100043364|AI835472|AW491075|Ank-2|Gm4392	ankyrin 2, brain	protein-coding
546	chr17	16054424	16055058	+	2.98	7.8	4.81	8.85e-08	Intergenic	Intergenic	-228155	NM_178615	68799	Mm.293466	NM_178615	ENSMUSG00000048027	Rgmb	1110059F19Rik|DRAGON	repulsive guidance molecule family member B	protein-coding
547	chr19	32551470	32551936	+	2.65	8.39	5.74	8.85e-08	Intergenic	Intergenic	-44012	NM_001201470	23972	Mm.203916	NM_011864	ENSMUSG00000024899	Papss2	1810018P12Rik|AI159688|AtpsU2|Atpsk2|Sk2|bm	3'-phosphoadenosine 5'-phosphosulfate synthase 2	protein-coding
548	chr11	20872424	20873315	+	1.99	9.42	7.43	8.88e-08	Intergenic	Intergenic	-41761	NM_173752	216551	Mm.76694	NM_173752	ENSMUSG00000042363	Lgalsl	1110067D22Rik|A530071M23|Grpa|Hspc159|Lgalsla	lectin, galactoside binding-like	protein-coding
549	chr9	72797079	72797669	+	2.57	8.33	5.76	8.9e-08	Intergenic	Intergenic	-9900	NM_175485	235472	Mm.31696	NM_175485	ENSMUSG00000036030	Prtg	A230098A12Rik|Igdcc5	protogenin	protein-coding
550	chr1	9649081	9649851	+	2.94	8.37	5.43	8.93e-08	Intergenic	Intergenic	-18374	NR_015470	72481	Mm.279818	NR_015470	ENSMUSG00000079671	2610203C22Rik	2310007M24Rik	RIKEN cDNA 2610203C22 gene	ncRNA
551	chr13	14930041	14930779	+	2.72	8.01	5.29	9e-08	Intergenic	Intergenic	300152	NM_134067	105351	Mm.41450	NM_134067	ENSMUSG00000039182	AW209491	-	expressed sequence AW209491	protein-coding
552	chr6	55395944	55397125	+	2.64	8.91	6.28	9e-08	promoter-TSS (NR_046179)	promoter-TSS (NR_046179)	-353	NR_046179	330324	Mm.113703	NR_046179	ENSMUSG00000108228	6430584L05Rik	6430584L05	RIKEN cDNA 6430584L05 gene	ncRNA
553	chr5	106956321	106956836	+	2.9	8.05	5.15	9.01e-08	Intergenic	Intergenic	-7744	NM_001271567	12545	Mm.20842	NM_009863	ENSMUSG00000029283	Cdc7	AI597260|Cdc7l1|muCdc7	cell division cycle 7 (S. cerevisiae)	protein-coding
554	chr16	65828118	65828564	+	3.12	7.88	4.77	9.17e-08	intron (NM_028572, intron 2 of 3)	intron (NM_028572, intron 2 of 3)	12708	NM_028572	73569	Mm.25670	NM_028572	ENSMUSG00000091243	Vgll3	1700110N18Rik|4832416J22|C80713|Vgl-3|Vito-2	vestigial like family member 3	protein-coding
555	chr17	11092804	11093268	+	2.75	7.82	5.08	9.23e-08	intron (NM_001317726, intron 2 of 6)	intron (NM_001317726, intron 2 of 6)	252677	NM_001317726	50873	Mm.311110	NM_016694	ENSMUSG00000023826	Park2	PRKN	Parkinson disease (autosomal recessive, juvenile) 2, parkin	protein-coding
556	chr3	157209003	157209787	+	2.76	8.1	5.34	9.25e-08	intron (NM_001039094, intron 6 of 6)	intron (NM_001039094, intron 6 of 6)	324695	NR_152231	381498	Mm.402095	NR_152231	ENSMUSG00000105834	4930592C13Rik	Gm1657|Gm43159	RIKEN cDNA 4930592C13 gene	ncRNA
557	chr11	56290641	56291156	+	3.12	7.69	4.58	9.39e-08	Intergenic	Intergenic	-249911	NM_153079	216749	Mm.213205	NM_153079	ENSMUSG00000037393	Nmur2	Nmu2r	neuromedin U receptor 2	protein-coding
558	chr15	10940177	10940606	+	3.02	7.77	4.75	9.53e-08	Intergenic	Intergenic	-11941	NM_030888	81799	Mm.280158	NM_030888	ENSMUSG00000058914	C1qtnf3	2310005P21Rik|CORS-26|CORS26|CTRP3|Corcs|Cors	C1q and tumor necrosis factor related protein 3	protein-coding
559	chr3	151913780	151914479	+	-2.4	6.03	8.43	9.53e-08	Intergenic	Intergenic	-76601	NM_008966	19220	Mm.331442	NM_008966	ENSMUSG00000028036	Ptgfr	AI957154|PGF|fp	prostaglandin F receptor	protein-coding
560	chr14	65739012	65739662	+	3.06	8.37	5.31	9.55e-08	intron (NM_001168318, intron 5 of 7)	intron (NM_001168318, intron 5 of 7)	-66574	NM_023209	52033	Mm.24337	NM_023209	ENSMUSG00000022033	Pbk	2810434B10Rik|AW538537|D14Ertd732e|TOPK	PDZ binding kinase	protein-coding
561	chr5	149381654	149382997	+	2.55	8.86	6.31	9.58e-08	Intergenic	Intergenic	-29424	NM_027519	70717	Mm.252139	NM_027519	ENSMUSG00000029659	Medag	6330406I15Rik|Awms3|MEDA-4|Meda4|mAWMS3	mesenteric estrogen dependent adipogenesis	protein-coding
562	chr1	156763343	156763703	+	3.43	7.25	3.81	9.78e-08	Intergenic	Intergenic	-44613	NM_145413	215015	Mm.229107	NM_145413	ENSMUSG00000033557	Fam20b	C530043G21Rik|mKIAA0475	family with sequence similarity 20, member B	protein-coding
563	chr1	90710635	90710961	+	3.04	7.37	4.33	9.78e-08	Intergenic	LTR75|LTR|ERVL	107373	NM_133805	108679	Mm.119177	NM_133805	ENSMUSG00000034432	Cops8	9430009J09Rik|AA408242|Csn8|Sgn8	COP9 signalosome subunit 8	protein-coding
564	chr12	91786201	91786887	+	2.03	9.08	7.05	9.78e-08	promoter-TSS (NM_175367)	promoter-TSS (NM_175367)	-108	NM_175367	108800	Mm.23125	NM_175367	ENSMUSG00000020961	Ston2	4933401N24Rik|AI425999|AW544599	stonin 2	protein-coding
565	chr9	58310099	58310714	+	2.81	8.46	5.65	9.97e-08	intron (NM_010729, intron 1 of 6)	intron (NM_010729, intron 1 of 6)	2806	NM_010729	16949	Mm.250492	NM_010729	ENSMUSG00000032334	Loxl1	Loxl	lysyl oxidase-like 1	protein-coding
566	chr12	16850511	16851274	+	2.04	8.84	6.8	9.97e-08	Intergenic	ERV3-16A3_LTR|LTR|ERVL	39927	NM_033270	50496	Mm.23296	NM_033270	ENSMUSG00000057469	E2f6	AI462434|E2F6a|E2F6b|EMA	E2F transcription factor 6	protein-coding
567	chr1	119033432	119034626	+	2.28	9.17	6.89	1.01e-07	intron (NM_001081125, intron 1 of 13)	intron (NM_001081125, intron 1 of 13)	19590	NM_001081125	14633	Mm.273292	NM_001081125	ENSMUSG00000048402	Gli2	-	GLI-Kruppel family member GLI2	protein-coding
568	chr15	83997539	83998484	+	3.14	8.25	5.11	1.04e-07	intron (NM_029946, intron 6 of 31)	intron (NM_029946, intron 6 of 31)	-61916	NM_001161628	77627	Mm.196288	NM_029946	ENSMUSG00000022441	Efcab6	4931407K02Rik|4932408N08Rik|bM150J22.2|mKIAA1672	EF-hand calcium binding domain 6	protein-coding
569	chr13	35463167	35464221	+	2.05	8.79	6.74	1.04e-07	Intergenic	Intergenic	-196168	NM_009881	12593	Mm.29002	NM_009881	ENSMUSG00000059288	Cdyl	AI325931	chromodomain protein, Y chromosome-like	protein-coding
570	chr2	72600720	72601136	+	3.44	7.37	3.93	1.05e-07	Intergenic	Intergenic	-102582	NR_040503	74541	Mm.410774	NR_040503	ENSMUSG00000085252	8430437L04Rik	-	RIKEN cDNA 8430437L04 gene	ncRNA
571	chr2	133994077	133994723	+	2.85	7.97	5.12	1.05e-07	Intergenic	Intergenic	429692	NR_037273	100526500		NR_037273	ENSMUSG00000093338	Mir3090	mmu-mir-3090	microRNA 3090	ncRNA
572	chr17	16166577	16167348	+	2.85	7.77	4.92	1.05e-07	Intergenic	Intergenic	-340376	NM_178615	68799	Mm.293466	NM_178615	ENSMUSG00000048027	Rgmb	1110059F19Rik|DRAGON	repulsive guidance molecule family member B	protein-coding
573	chr1	56089417	56089936	+	2.33	8.54	6.21	1.05e-07	Intergenic	Intergenic	70698	NR_126075	69356	Mm.393775	NR_126075	ENSMUSG00000100372	1700003I22Rik	-	RIKEN cDNA 1700003I22 gene	ncRNA
574	chrX	42373862	42374444	+	3.25	7.62	4.37	1.06e-07	Intergenic	Intergenic	-128412	NM_001313689	20400	Mm.441197	NM_011364	ENSMUSG00000005696	Sh2d1a	Gm686|SAP	SH2 domain containing 1A	protein-coding
575	chr9	61445529	61446511	+	2.82	8.34	5.52	1.06e-07	Intergenic	Intergenic	73654	NM_001083927	21887	Mm.24255	NM_009389	ENSMUSG00000032280	Tle3	2610103N05Rik|ESG|Grg3a|Grg3b|mKIAA1547	transducin-like enhancer of split 3	protein-coding
576	chr18	58472174	58472702	+	2.8	7.77	4.97	1.06e-07	Intergenic	Intergenic	-83802	NM_001081072	225579	Mm.258517	NM_001081072	ENSMUSG00000024600	Slc27a6	4732438L20Rik|FACVL2|FATP6|VLCS-H1	solute carrier family 27 (fatty acid transporter), member 6	protein-coding
577	chr18	46809702	46810559	+	2.69	8.69	6	1.07e-07	Intergenic	Intergenic	-39909	NM_029008	74574	Mm.26379	NM_029008	ENSMUSG00000024481	Lvrn	4833403I15Rik|APQ|Aqpep	laeverin	protein-coding
578	chr12	111743408	111744381	+	2.54	8.85	6.3	1.09e-07	intron (NM_001163388, intron 4 of 5)	intron (NM_001163388, intron 4 of 5)	-14955	NM_001361609	16593	Mm.278357	NM_008450	ENSMUSG00000021288	Klc1	AI874768|Kns2	kinesin light chain 1	protein-coding
579	chr3	52954591	52955154	+	-2.42	6.24	8.66	1.09e-07	Intergenic	Intergenic	-27206	NR_040555	622124	Mm.389434	NR_040555	ENSMUSG00000104401	Gm20750	-	predicted gene, 20750	ncRNA
580	chr15	95757110	95757473	+	2.9	7.89	4.99	1.1e-07	Intergenic	Intergenic	-5700	NR_131148	629300	Mm.247258	NR_131148	ENSMUSG00000115699	Gm6961	EG629300	predicted gene 6961	ncRNA
581	chrX	143046262	143046692	+	3.47	7.29	3.82	1.15e-07	Intergenic	Intergenic	-53117	NM_001040434	209540	Mm.297608	NM_001040434	ENSMUSG00000085584	Rtl9	Gm385|Mar9|Mart9|Rgag1	retrotransposon Gag like 9	protein-coding
582	chr4	64129318	64129710	+	2.99	7.59	4.6	1.17e-07	Intergenic	Intergenic	-82499	NM_011607	21923	Mm.980	NM_011607	ENSMUSG00000028364	Tnc	AI528729|C130033P17Rik|Hxb|TN|TN-C|Ten|cytotactin|tenascin-C	tenascin C	protein-coding
583	chr1	83850983	83851500	+	2.98	7.79	4.81	1.17e-07	Intergenic	Intergenic	367720	NR_105771	102465181		NR_105771	ENSMUSG00000098851	Mir6353	Gm27391|mmu-mir-6353	microRNA 6353	ncRNA
584	chr9	69181338	69181907	+	2.71	8.4	5.7	1.17e-07	intron (NM_013646, intron 1 of 10)	intron (NM_013646, intron 1 of 10)	-108219	NM_001289916	19883	Mm.378450	NM_013646	ENSMUSG00000032238	Rora	9530021D13Rik|Nr1f1|ROR1|ROR2|ROR3|nmf267|sg|staggerer|tmgc26	RAR-related orphan receptor alpha	protein-coding
585	chr10	22875150	22875562	+	3.19	7.65	4.47	1.18e-07	Intergenic	Intergenic	-55228	NM_011545	21412	Mm.16497	NM_011545	ENSMUSG00000045680	Tcf21	Pod-1|Pod1|bHLHa23|capsulin|epc|epicardin	transcription factor 21	protein-coding
586	chr14	11151596	11152196	+	2.88	8.12	5.24	1.18e-07	intron (NM_001360141, intron 1 of 9)	intron (NM_001360141, intron 1 of 9)	10139	NM_001360141	14198	Mm.397619	NM_010210	ENSMUSG00000060579	Fhit	AW045638|Fra14A2	fragile histidine triad gene	protein-coding
587	chr1	119025126	119026477	+	2.68	9.24	6.56	1.19e-07	intron (NM_001081125, intron 1 of 13)	intron (NM_001081125, intron 1 of 13)	27818	NM_001081125	14633	Mm.273292	NM_001081125	ENSMUSG00000048402	Gli2	-	GLI-Kruppel family member GLI2	protein-coding
588	chr6	136894472	136895584	+	2.66	8.97	6.31	1.22e-07	Intergenic	Intergenic	-19205	NM_008597	17313	Mm.243085	NM_008597	ENSMUSG00000030218	Mgp	Mglap	matrix Gla protein	protein-coding
589	chr17	67866544	67867199	+	2.82	8.19	5.37	1.23e-07	intron (NM_172964, intron 10 of 17)	intron (NM_172964, intron 10 of 17)	84069	NM_001347410	268970	Mm.9935	NM_172964	ENSMUSG00000024043	Arhgap28	AU044757|AW550892|E130310N06	Rho GTPase activating protein 28	protein-coding
590	chr11	22387559	22388096	+	2.73	7.9	5.17	1.23e-07	Intergenic	RLTR13D3|LTR|ERVK	-101032	NM_001252515	216565	Mm.491265	NM_153078	ENSMUSG00000042302	Ehbp1	AF424697|Flj21950|NACSIN	EH domain binding protein 1	protein-coding
591	chr10	70496825	70497343	+	3.54	7.89	4.35	1.24e-07	intron (NM_001359551, intron 5 of 14)	intron (NM_001359551, intron 5 of 14)	56174	NM_001143776	71721	Mm.477813	NM_024244	ENSMUSG00000043259	Fam13c	1200015N20Rik|C030038O19Rik|mKIAA1796	family with sequence similarity 13, member C	protein-coding
592	chr15	75544125	75544566	+	2.96	7.58	4.61	1.25e-07	Intergenic	Intergenic	22303	NM_001135689	23934	Mm.22154	NM_011837	ENSMUSG00000022577	Ly6h	-	lymphocyte antigen 6 complex, locus H	protein-coding
593	chr3	121588923	121589959	+	2.54	9.1	6.56	1.25e-07	Intergenic	Intergenic	54044	NR_036456	100503044	Mm.65320	NM_176992	ENSMUSG00000044522	A730020M07Rik	-	RIKEN cDNA A730020M07 gene	ncRNA
594	chr6	88716891	88717794	+	-2.39	6.86	9.25	1.26e-07	Intergenic	Intergenic	-7070	NM_001166249	23945	Mm.272197	NM_011844	ENSMUSG00000033174	Mgll	AA589436|Magl|Mgl	monoglyceride lipase	protein-coding
595	chr3	27759061	27759454	+	2.84	8.05	5.21	1.29e-07	Intergenic	Intergenic	-48805	NM_173182	72007	Mm.38832	NM_173182	ENSMUSG00000039286	Fndc3b	1600019O04Rik|AW550168|Fad104|mKIAA4164	fibronectin type III domain containing 3B	protein-coding
596	chr3	90605952	90606685	+	2.77	7.93	5.16	1.29e-07	TTS (NM_011311)	TTS (NM_011311)	-2204	NM_011312	20199	Mm.19946	NM_011312	ENSMUSG00000001023	S100a5	S100D9	S100 calcium binding protein A5	protein-coding
597	chr1	164809242	164810007	+	2.42	8.75	6.33	1.29e-07	intron (NM_019759, intron 2 of 3)	intron (NM_019759, intron 2 of 3)	12961	NM_019759	56429	Mm.28935	NM_019759	ENSMUSG00000026574	Dpt	1810032B19Rik|5033416F05Rik|EQ-1|Eq1	dermatopontin	protein-coding
598	chr10	17038476	17039103	+	3.14	7.86	4.72	1.3e-07	intron (NR_038020, intron 1 of 8)	intron (NR_038020, intron 1 of 8)	56993	NR_038020	100504235	Mm.84044	NR_038020	ENSMUSG00000101969	Gm20125	-	predicted gene, 20125	ncRNA
599	chr6	58951483	58952174	+	2.75	8.17	5.42	1.3e-07	intron (NM_153574, intron 13 of 17)	intron (NM_153574, intron 13 of 17)	-44702	NM_021432	58243	Mm.389747	NM_021432	ENSMUSG00000055430	Nap1l5	1110020M21Rik	nucleosome assembly protein 1-like 5	protein-coding
600	chr18	32813360	32814438	+	2.74	8.95	6.21	1.31e-07	intron (NR_045381, intron 2 of 4)	intron (NR_045381, intron 2 of 4)	-1484	NM_021367	53603	Mm.143716	NM_021367	ENSMUSG00000024379	Tslp	-	thymic stromal lymphopoietin	protein-coding
601	chr18	39379401	39380498	+	2.4	8.77	6.37	1.32e-07	Intergenic	Intergenic	107296	NM_008173	14815	Mm.129481	NM_008173	ENSMUSG00000024431	Nr3c1	GR|Grl-1|Grl1	nuclear receptor subfamily 3, group C, member 1	protein-coding
602	chr4	106186556	106187034	+	3.48	7.09	3.61	1.34e-07	Intergenic	Intergenic	-54418	NR_151521	105244641	Mm.404914	NR_151521		Gm12724	-	predicted gene 12724	ncRNA
603	chr6	141575602	141576003	+	3.35	7.4	4.05	1.36e-07	Intergenic	Intergenic	51448	NM_001177772	58807	Mm.284495	NM_021471	ENSMUSG00000030235	Slco1c1	OATP-14|OATP-F|Oatp2|Oatpf|Slc21a14	solute carrier organic anion transporter family, member 1c1	protein-coding
604	chr2	31371344	31372050	+	2.98	8.14	5.16	1.36e-07	Intergenic	Intergenic	-98573	NM_007494	11898	Mm.3217	NM_007494	ENSMUSG00000076441	Ass1	AA408052|ASS|Ass-1|fold	argininosuccinate synthetase 1	protein-coding
605	chr2	75000138	75000844	+	2.74	8.39	5.65	1.37e-07	Intergenic	Intergenic	174679	NM_016804	53375	Mm.292613	NM_016804	ENSMUSG00000027099	Mtx2	1500012G02Rik	metaxin 2	protein-coding
606	chr5	97693352	97693911	+	2.78	7.88	5.1	1.38e-07	Intergenic	Intergenic	-236608	NM_010294	14626	Mm.61206	NM_010294	ENSMUSG00000050553	Gk2	GKTA|Gk-rs2	glycerol kinase 2	protein-coding
607	chr15	35861901	35862344	+	3.52	7.72	4.2	1.39e-07	intron (NM_177151, intron 43 of 61)	intron (NM_177151, intron 43 of 61)	76124	NM_053071	12864	Mm.548	NM_053071	ENSMUSG00000014313	Cox6c	-	cytochrome c oxidase subunit VIc	protein-coding
608	chr8	114821334	114821939	+	2.93	8.28	5.35	1.39e-07	intron (NM_019573, intron 8 of 8)	intron (NM_019573, intron 8 of 8)	381984	NM_019573	80707	Mm.440420	NM_019573	ENSMUSG00000004637	Wwox	5330426P09Rik|9030416C10Rik|WOX1	WW domain-containing oxidoreductase	protein-coding
609	chr3	39944470	39944978	+	2.51	8.42	5.91	1.39e-07	Intergenic	Intergenic	578188	NR_040445	100040882	Mm.272869	NR_040445	ENSMUSG00000037884	1700017G19Rik	-	RIKEN cDNA 1700017G19 gene	ncRNA
610	chr5	74935689	74936414	+	2.55	7.81	5.26	1.43e-07	Intergenic	Intergenic	-13143	NR_045866	619945	Mm.359372	NM_001037908	ENSMUSG00000072874	Gm6116	EG619945	predicted gene 6116	ncRNA
611	chr15	63079824	63080280	+	3.28	7.54	4.26	1.46e-07	Intergenic	Intergenic	399556	NR_045279	432958	Mm.255105	NR_045279	ENSMUSG00000115520	Gm20740	-	predicted gene, 20740	ncRNA
612	chr1	133470424	133471782	+	2.15	9.47	7.32	1.46e-07	Intergenic	Intergenic	-46891	NM_011439	20668	Mm.8575	NM_011439	ENSMUSG00000070643	Sox13	AA407916|AW259412|AW540933|Sox-13	SRY (sex determining region Y)-box 13	protein-coding
613	chr17	7749140	7749543	+	3.64	6.95	3.32	1.48e-07	intron (NM_001081416, intron 15 of 19)	intron (NM_001081416, intron 15 of 19)	55633	NM_001081416	68655	Mm.379161	NM_001081416	ENSMUSG00000071984	Fndc1	1110027O12Rik|1110051A18Rik|mKIAA1866	fibronectin type III domain containing 1	protein-coding
614	chr15	101308429	101309591	+	2.69	8.85	6.16	1.48e-07	Intergenic	Intergenic	15798	NR_033803	77717	Mm.391998	NR_033803	ENSMUSG00000075408	6030408B16Rik	AI225877	RIKEN cDNA 6030408B16 gene	ncRNA
615	chr17	11975058	11975754	+	2.38	8.37	5.99	1.51e-07	intron (NM_016694, intron 9 of 11)	intron (NM_016694, intron 9 of 11)	-92217	NR_045808	52027	Mm.442257	NR_045808		D17Ertd648e	-	DNA segment, Chr 17, ERATO Doi 648, expressed	ncRNA
616	chr14	65711669	65712349	+	3.22	7.98	4.76	1.52e-07	intron (NM_001168318, intron 3 of 7)	intron (NM_001168318, intron 3 of 7)	45606	NM_001168318	71145	Mm.83840	NM_028903	ENSMUSG00000022032	Scara5	4932433F15Rik|4933425F03Rik|AV278087|Tesr	scavenger receptor class A, member 5	protein-coding
617	chr16	10865481	10867748	+	2.07	9.32	7.26	1.52e-07	Intergenic	Intergenic	31555	NM_001162932	223970	Mm.325777	NM_001033278	ENSMUSG00000037991	Rmi2	A630055G03Rik|Gm537|Gm929	RecQ mediated genome instability 2	protein-coding
618	chr7	137765876	137766389	+	3.19	7.91	4.71	1.53e-07	Intergenic	RMER6A|LTR|ERVK	328458	NR_033611	620016	Mm.388932	NR_033611	ENSMUSG00000100863	Gm12669	-	glutaredoxin 3 pseudogene	pseudo
619	chr8	47783991	47784959	+	2.54	8.51	5.97	1.53e-07	Intergenic	Intergenic	33742	NR_151456	105243184	Mm.297069	NR_151456	ENSMUSG00000110464	1700061N14Rik	Gm45862	RIKEN cDNA 1700061N14 gene	ncRNA
620	chr17	34507588	34508006	+	3.53	7.34	3.81	1.54e-07	TTS (NM_030747)	TTS (NM_030747)	9555	NM_030747	624681	Mm.471592	NM_030747	ENSMUSG00000092618	Btnl6	EG624681|Gm6519|NG13	butyrophilin-like 6	protein-coding
621	chr13	42537998	42538536	+	2.96	7.69	4.73	1.54e-07	Intergenic	Intergenic	-142532	NM_001302635	218194	Mm.160124	NM_198419	ENSMUSG00000054728	Phactr1	9630030F18Rik|Rpel1	phosphatase and actin regulator 1	protein-coding
622	chr4	117641009	117641680	+	2.69	7.91	5.22	1.55e-07	intron (NM_001356405, intron 7 of 8)	intron (NM_001356405, intron 7 of 8)	40881	NM_023178	66233	Mm.29142	NM_023178	ENSMUSG00000009640	Dmap1	1500016M21Rik|DNMAP1|DNMTAP1|Dmtap1|mKIAA1425	DNA methyltransferase 1-associated protein 1	protein-coding
623	chr13	97598447	97599602	+	2.69	8.83	6.14	1.57e-07	Intergenic	Intergenic	39024	NR_046157	328314	Mm.138047	NR_046157	ENSMUSG00000110235	Gm5086	B230311A21|EG328314	predicted gene 5086	ncRNA
624	chr8	116832168	116832780	+	2.92	8.43	5.51	1.58e-07	Intergenic	Intergenic	-31062	NR_046193	78213	Mm.402039	NR_046193		4930563M20Rik	-	RIKEN cDNA 4930563M20 gene	ncRNA
625	chrX	134873549	134874026	+	3.94	7.25	3.31	1.59e-07	Intergenic	Intergenic	-64566	NM_026139	67416	Mm.285969	NM_026139	ENSMUSG00000033436	Armcx2	3230401N03Rik|AI043003|ALEX2	armadillo repeat containing, X-linked 2	protein-coding
626	chr3	143732851	143733772	+	2.8	8.39	5.59	1.59e-07	Intergenic	Intergenic	-21168	NR_040405	621809	Mm.360134	NR_040405	ENSMUSG00000105279	Gm6260	EG621809	predicted gene 6260	ncRNA
627	chr19	33109729	33110618	+	2.78	8.87	6.09	1.59e-07	Intergenic	Intergenic	-46939	NR_039552	100628575		NR_039552	ENSMUSG00000106278	Mir3970	mmu-mir-3970|mu-mir-3970	microRNA 3970	ncRNA
628	chr10	39343538	39343959	+	3.3	7.3	4	1.6e-07	Intergenic	Intergenic	-26051	NM_001122893	14360	Mm.4848	NM_008054	ENSMUSG00000019843	Fyn	AI448320|AW552119	Fyn proto-oncogene	protein-coding
629	chr17	66751392	66752130	+	2.69	8.1	5.4	1.6e-07	intron (NM_001357625, intron 20 of 32)	intron (NM_001357625, intron 20 of 32)	37305	NR_151453	102639882	Mm.443262	NR_151453		1700016K05Rik	-	RIKEN cDNA 1700016K05 gene	ncRNA
630	chr13	38398668	38399278	+	2.76	7.95	5.19	1.63e-07	intron (NM_007556, intron 1 of 6)	intron (NM_007556, intron 1 of 6)	53257	NM_007556	12161	Mm.385759	NM_007556	ENSMUSG00000039004	Bmp6	D13Wsu115e|Vgr1	bone morphogenetic protein 6	protein-coding
631	chr6	8094446	8094977	+	-2.6	4.87	7.48	1.64e-07	intron (NM_001037865, intron 16 of 34)	intron (NM_001037865, intron 16 of 34)	97906	NM_001037865	213945	Mm.297404	NM_001037865	ENSMUSG00000068794	Col28a1	Col28|Gm466	collagen, type XXVIII, alpha 1	protein-coding
632	chr4	98221580	98222056	+	3.48	7.93	4.45	1.65e-07	Intergenic	Intergenic	161447	NM_053157	94043	Mm.331719	NM_053157	ENSMUSG00000028563	Tm2d1	2310026L18Rik|AA990549|Bbp	TM2 domain containing 1	protein-coding
633	chr13	59572611	59572932	+	3.05	7.56	4.5	1.65e-07	Intergenic	RMER6A|LTR|ERVK	12452	NR_045633	319469	Mm.437992	NR_045633	ENSMUSG00000021557	A230056J06Rik	-	RIKEN cDNA A230056J06 gene	ncRNA
634	chr6	87567683	87568538	+	2.58	8.43	5.85	1.65e-07	Intergenic	Intergenic	22633	NM_021381	58182	Mm.333226	NM_021381	ENSMUSG00000049409	Prokr1	EG-VEGFR1|Gpr73|Pk-r1|Pkr1	prokineticin receptor 1	protein-coding
635	chr7	126922652	126923213	+	2.56	7.99	5.43	1.65e-07	Intergenic	Intergenic	-5947	NM_172747	233877	Mm.245897	NM_172747	ENSMUSG00000030685	Kctd13	1500003N18Rik|AV259508|PDIP1alpha|Pdip1|Poldip1	potassium channel tetramerisation domain containing 13	protein-coding
636	chr9	58299321	58300078	+	2.55	8.05	5.5	1.65e-07	intron (NM_010729, intron 1 of 6)	intron (NM_010729, intron 1 of 6)	13513	NM_010729	16949	Mm.250492	NM_010729	ENSMUSG00000032334	Loxl1	Loxl	lysyl oxidase-like 1	protein-coding
637	chr4	106195304	106195828	+	2.93	7.53	4.6	1.73e-07	Intergenic	Intergenic	-45647	NR_151521	105244641	Mm.404914	NR_151521		Gm12724	-	predicted gene 12724	ncRNA
638	chr17	34690267	34690975	+	2.87	8.46	5.58	1.73e-07	intron (NM_031176, intron 11 of 32)	intron (NM_031176, intron 11 of 32)	20086	NM_031176	81877	Mm.290527	NM_031176	ENSMUSG00000033327	Tnxb	Tn-mhc|Tnx	tenascin XB	protein-coding
639	chr6	143640606	143641032	+	2.65	7.83	5.18	1.74e-07	intron (NR_045732, intron 1 of 4)	intron (NR_045732, intron 1 of 4)	10469	NR_045732	73425	Mm.417844	NR_045732	ENSMUSG00000086887	1700060C16Rik	-	RIKEN cDNA 1700060C16 gene	ncRNA
640	chr10	60928255	60928966	+	-2.93	4.49	7.43	1.74e-07	non-coding (NR_033616, exon 3 of 3)	non-coding (NR_033616, exon 3 of 3)	5587	NR_105835	102466158		NR_105835	ENSMUSG00000099279	Mir6408	Gm27451|mmu-mir-6408	microRNA 6408	ncRNA
641	chr14	70023131	70023737	+	2.39	8.99	6.61	1.75e-07	intron (NM_028560, intron 4 of 6)	intron (NM_028560, intron 4 of 6)	-54011	NM_001289925	13655	Mm.103737	NM_018781	ENSMUSG00000033730	Egr3	Pilot	early growth response 3	protein-coding
642	chr1	163607593	163608216	+	2.72	7.92	5.2	1.76e-07	Intergenic	Intergenic	117328	NM_001143956	240879	Mm.484621	NM_001143956	ENSMUSG00000040113	Mettl11b	Gm207|NTM1B	methyltransferase like 11B	protein-coding
643	chr3	19450938	19451347	+	3.42	7.61	4.19	1.79e-07	Intergenic	MLT1H|LTR|ERVL-MaLR	-57453	NM_001163536	66326	Mm.45615	NM_025489	ENSMUSG00000027606	Dnajc5b	1700008A05Rik	DnaJ heat shock protein family (Hsp40) member C5 beta	protein-coding
644	chr4	47132030	47133135	+	2.57	8.8	6.23	1.79e-07	Intergenic	Intergenic	40629	NM_172693	230145	Mm.132246	NM_172693	ENSMUSG00000039774	Galnt12	9130206E10|A630062B03Rik	polypeptide N-acetylgalactosaminyltransferase 12	protein-coding
645	chr9	116808401	116808852	+	2.94	7.42	4.48	1.8e-07	intron (NM_001172124, intron 5 of 13)	intron (NM_001172124, intron 5 of 13)	443857	NM_001172122	207181	Mm.326411	NM_178660	ENSMUSG00000039607	Rbms3	6720477E09Rik|8430436O14Rik	RNA binding motif, single stranded interacting protein	protein-coding
646	chr2	168025147	168025650	+	3.35	7.78	4.43	1.82e-07	Intergenic	(TG)n|Simple_repeat|Simple_repeat	-14805	NM_001080708	69553	Mm.68454	NM_001080708	ENSMUSG00000074577	Ripor3	2310033K02Rik|Fam65c|Gm124	RIPOR family member 3	protein-coding
647	chr10	70968915	70969876	+	2.94	8.75	5.8	1.84e-07	intron (NM_031397, intron 3 of 20)	intron (NM_031397, intron 3 of 20)	190295	NM_001347189	83675	Mm.286834	NM_031397	ENSMUSG00000014329	Bicc1	Bic-C|bpk|jcpk	BicC family RNA binding protein 1	protein-coding
648	chr3	38193956	38194407	+	2.89	7.6	4.72	1.86e-07	Intergenic	Intergenic	13938	NR_040541	71342	Mm.410782	NR_040541	ENSMUSG00000106002	5430434I15Rik	-	RIKEN cDNA 5430434I15 gene	ncRNA
649	chr15	94503501	94504145	+	3.03	7.8	4.77	1.89e-07	Intergenic	Intergenic	39684	NM_172437	78895	Mm.34344	NM_172437	ENSMUSG00000033356	Pus7l	3000003F02Rik	pseudouridylate synthase 7-like	protein-coding
650	chr19	44519036	44519638	+	2.77	8.41	5.63	1.89e-07	exon (NM_001033343, exon 21 of 26)	exon (NM_001033343, exon 21 of 26)	25865	NM_011720	22423	Mm.88365	NM_011720	ENSMUSG00000036961	Wnt8b	-	wingless-type MMTV integration site family, member 8B	protein-coding
651	chr1	135755064	135756015	+	2.05	9.11	7.06	1.92e-07	Intergenic	MER5A1|DNA|hAT-Charlie	-10546	NM_013750	27280	Mm.34346	NM_013750	ENSMUSG00000041801	Phlda3	Tih1	pleckstrin homology like domain, family A, member 3	protein-coding
652	chr2	4620305	4621543	+	2.54	8.92	6.38	1.96e-07	Intergenic	Intergenic	31211	NM_026045	67229	Mm.38529	NM_026045	ENSMUSG00000039449	Prpf18	2810441A10Rik	pre-mRNA processing factor 18	protein-coding
653	chr7	81149681	81150127	+	2.8	7.67	4.87	1.98e-07	intron (NM_001004184, intron 10 of 17)	intron (NM_001004184, intron 10 of 17)	35105	NM_001004184	434203	Mm.389909	NM_001004184	ENSMUSG00000025726	Slc28a1	Cnt1	solute carrier family 28 (sodium-coupled nucleoside transporter), member 1	protein-coding
654	chr17	70719925	70720330	+	3.16	7.69	4.53	2e-07	intron (NM_001347411, intron 9 of 14)	B4A|SINE|B4	126650	NM_001164077	21815	Mm.101034	NM_009372	ENSMUSG00000047407	Tgif1	AA959811|AI462167|Tgif	TGFB-induced factor homeobox 1	protein-coding
655	chr5	149388973	149390101	+	2.27	9.06	6.79	2e-07	Intergenic	Intergenic	-22212	NM_027519	70717	Mm.252139	NM_027519	ENSMUSG00000029659	Medag	6330406I15Rik|Awms3|MEDA-4|Meda4|mAWMS3	mesenteric estrogen dependent adipogenesis	protein-coding
656	chr7	145265940	145267400	+	2.42	8.9	6.49	2.01e-07	intron (NR_132643, intron 12 of 22)	intron (NR_132643, intron 12 of 22)	17341	NR_132644	233979	Mm.102235	NM_146206	ENSMUSG00000048677	Tpcn2	D830047E22Rik|Gm35086	two pore segment channel 2	protein-coding
657	chr14	123531354	123531806	+	2.44	8.25	5.81	2.02e-07	intron (NM_177393, intron 7 of 43)	intron (NM_177393, intron 7 of 43)	95564	NM_177393	338370	Mm.255348	NM_177393	ENSMUSG00000000197	Nalcn	A530023G15Rik|AI849508|Vgcnl1	sodium leak channel, non-selective	protein-coding
658	chr10	61277831	61278452	+	2.33	8.93	6.59	2.04e-07	Intergenic	Intergenic	-4703	NM_001081127	237360	Mm.333252	NM_001081127	ENSMUSG00000059901	Adamts14	Adamts-14|TS14	a disintegrin-like and metallopeptidase (reprolysin type) with thrombospondin type 1 motif, 14	protein-coding
659	chr3	145951808	145952229	+	2.82	8.2	5.38	2.05e-07	Intergenic	Intergenic	14004	NM_025555	66421	Mm.25137	NM_025555	ENSMUSG00000036873	2410004B18Rik	4930572C24Rik	RIKEN cDNA 2410004B18 gene	protein-coding
660	chr5	107046305	107047065	+	2.67	8.34	5.67	2.05e-07	Intergenic	Intergenic	82124	NM_001271566	12545	Mm.20842	NM_009863	ENSMUSG00000029283	Cdc7	AI597260|Cdc7l1|muCdc7	cell division cycle 7 (S. cerevisiae)	protein-coding
661	chr5	74922919	74923769	+	2.65	7.95	5.3	2.06e-07	Intergenic	Intergenic	-25850	NR_045866	619945	Mm.359372	NM_001037908	ENSMUSG00000072874	Gm6116	EG619945	predicted gene 6116	ncRNA
662	chr16	86138210	86138508	+	3.28	7.1	3.82	2.1e-07	Intergenic	RMER16C|LTR|ERVK	-237234	NM_011782	23794	Mm.112933	NM_011782	ENSMUSG00000022894	Adamts5	9530092O11Rik|ADAM-TS5|ADAMTS1|ADAMTS11|ADMP-2|AI481094|ASMP-2	a disintegrin-like and metallopeptidase (reprolysin type) with thrombospondin type 1 motif, 5 (aggrecanase-2)	protein-coding
663	chr8	34065230	34066291	+	2.11	9.18	7.07	2.13e-07	Intergenic	Intergenic	42054	NM_001293758	22428	Mm.150373	NM_011722	ENSMUSG00000031516	Dctn6	AU044699|WS-3|p27	dynactin 6	protein-coding
664	chr10	70799218	70799655	+	3.4	7.38	3.98	2.18e-07	Intergenic	Intergenic	-143473	NR_045292	319646	Mm.483039	NR_045291	ENSMUSG00000037747	D630013N20Rik	-	RIKEN cDNA D630013N20 gene	ncRNA
665	chr9	68022308	68023008	+	3.09	8.12	5.03	2.2e-07	intron (NR_045745, intron 2 of 2)	intron (NR_045745, intron 2 of 2)	3056	NR_045745	434412	Mm.490707	NR_045745	ENSMUSG00000111841	Gm20745	-	predicted gene, 20745	ncRNA
666	chr2	136669159	136669558	+	3.16	7.61	4.46	2.21e-07	Intergenic	Intergenic	-44092	NM_001291056	20614	Mm.45953	NM_011428	ENSMUSG00000027273	Snap25	Bdr|GENA70|SNAP-25|SUP|sp	synaptosomal-associated protein 25	protein-coding
667	chr13	114760897	114761318	+	2.74	8.06	5.32	2.21e-07	Intergenic	Intergenic	-57130	NM_001113375	17434	Mm.19027	NM_013826	ENSMUSG00000015536	Mocs2	AI415403	molybdenum cofactor synthesis 2	protein-coding
668	chr14	67100252	67101625	+	2.14	9.77	7.63	2.21e-07	Intergenic	Intergenic	-28467	NM_001205188	71978	Mm.273997	NM_028032	ENSMUSG00000022052	Ppp2r2a	2410004D02Rik|mKIAA1541	protein phosphatase 2, regulatory subunit B, alpha	protein-coding
669	chr2	110488025	110488422	+	3.53	7.12	3.59	2.23e-07	Intergenic	Intergenic	-109076	NM_001177624	241612	Mm.277148	NM_001003915	ENSMUSG00000041644	Slc5a12	AI315119|D630015G19|SMCT2	solute carrier family 5 (sodium/glucose cotransporter), member 12	protein-coding
670	chr2	158191117	158191677	+	2.92	8.49	5.57	2.23e-07	promoter-TSS (NR_036606)	promoter-TSS (NR_036606)	-611	NR_036606	73399	Mm.416861	NR_036606	ENSMUSG00000078957	1700060C20Rik	-	RIKEN cDNA 1700060C20 gene	ncRNA
671	chr4	41481345	41482078	+	2.57	8.6	6.03	2.23e-07	TTS (NM_025539)	TTS (NM_025539)	16563	NM_025539	66401	Mm.28574	NM_025539	ENSMUSG00000028443	Nudt2	2310051L06Rik|AA939917|APAH1	nudix (nucleoside diphosphate linked moiety X)-type motif 2	protein-coding
672	chr11	113291729	113292771	+	2.42	8.66	6.23	2.23e-07	intron (NM_027216, intron 7 of 9)	intron (NM_027216, intron 7 of 9)	-82581	NR_040276	319871	Mm.383743	NR_040276	ENSMUSG00000085421	4732490B19Rik	-	RIKEN cDNA 4732490B19 gene	ncRNA
673	chr14	86308894	86309305	+	-2.86	4.59	7.45	2.23e-07	Intergenic	Intergenic	63129	NR_040457	75155	Mm.399239	NR_040457	ENSMUSG00000115271	4930529K09Rik	4930507G21Rik	RIKEN cDNA 4930529K09 gene	ncRNA
674	chr6	73228353	73229080	+	2.6	7.8	5.2	2.26e-07	Intergenic	Intergenic	-7085	NM_001164669	330355	Mm.333166	NM_001164669	ENSMUSG00000052861	Dnah6	9830168K20|A730004I20Rik|Dnahc6|mKIAA1697|mdhc6	dynein, axonemal, heavy chain 6	protein-coding
675	chr3	129680247	129680890	+	2.53	7.97	5.44	2.26e-07	intron (NM_001329594, intron 17 of 17)	intron (NM_001329594, intron 17 of 17)	44518	NM_001329594	13645	Mm.252481	NM_010113	ENSMUSG00000028017	Egf	AI790464	epidermal growth factor	protein-coding
676	chr5	35943141	35944104	+	2.33	8.79	6.47	2.29e-07	intron (NM_027373, intron 3 of 16)	intron (NM_027373, intron 3 of 16)	50303	NM_027373	70292	Mm.125167	NM_027373	ENSMUSG00000029094	Afap1	2600003E23Rik|9630044L16Rik|AI848729|Afap|mKIAA3018	actin filament associated protein 1	protein-coding
677	chr1	16334392	16335146	+	2.94	7.96	5.02	2.33e-07	intron (NM_001111272, intron 11 of 12)	L1ME2|LINE|L1	184346	NM_001347044	29819	Mm.216257	NM_025303	ENSMUSG00000025920	Stau2	-	staufen double-stranded RNA binding protein 2	protein-coding
678	chr7	89856255	89856921	+	2.66	8.21	5.55	2.34e-07	Intergenic	Intergenic	47041	NM_001162979	70884	Mm.252823	NM_001162979	ENSMUSG00000039391	Ccdc81	4921513D09Rik	coiled-coil domain containing 81	protein-coding
679	chr6	87992737	87993120	+	2.94	7.97	5.03	2.35e-07	Intergenic	Intergenic	11245	NR_026990	434064	Mm.371796	NR_026990	ENSMUSG00000084950	Gm5577	EG434064	predicted gene 5577	ncRNA
680	chr4	129951184	129951913	+	2.88	8.62	5.74	2.35e-07	Intergenic	Intergenic	-8826	NR_040647	72225	Mm.102193	NR_040647		1700003M07Rik	-	RIKEN cDNA 1700003M07 gene	ncRNA
681	chr6	24583327	24583950	+	2.87	8.56	5.69	2.35e-07	Intergenic	Intergenic	-14133	NM_053098	93677	Mm.332941	NM_053098	ENSMUSG00000029683	Lmod2	C-Lmod	leiomodin 2 (cardiac)	protein-coding
682	chr18	73287337	73287749	+	2.91	7.97	5.06	2.36e-07	Intergenic	Intergenic	-285162	NM_001039214	240396	Mm.24131	NM_001039214	ENSMUSG00000037253	Mex3c	A130001D14Rik|BC035207|BM-013|Rkhd2	mex3 RNA binding family member C	protein-coding
683	chr7	16760825	16762087	+	2.24	9.23	6.98	2.39e-07	Intergenic	Intergenic	-19890	NM_009201	20514	Mm.1056	NM_009201	ENSMUSG00000001918	Slc1a5	AAAT|ASCT2|ATBO|M7V1|M7VS1|R16|RDRC|Slc1a7	solute carrier family 1 (neutral amino acid transporter), member 5	protein-coding
684	chr15	5063686	5064101	+	2.94	7.56	4.62	2.42e-07	promoter-TSS (NM_001243837)	promoter-TSS (NM_001243837)	-120	NM_001243837	109828	Mm.208034	NM_001243837	ENSMUSG00000079105	C7	A530026G17|Gm1238	complement component 7	protein-coding
685	chr2	110411387	110412101	+	2.69	8.38	5.69	2.42e-07	Intergenic	Intergenic	-48751	NM_026271	67606	Mm.291809	NM_026271	ENSMUSG00000074971	Fibin	1110018M03Rik	fin bud initiation factor homolog (zebrafish)	protein-coding
686	chr10	70966770	70967797	+	2.74	8.68	5.94	2.43e-07	intron (NM_031397, intron 3 of 20)	intron (NM_031397, intron 3 of 20)	192407	NM_001347189	83675	Mm.286834	NM_031397	ENSMUSG00000014329	Bicc1	Bic-C|bpk|jcpk	BicC family RNA binding protein 1	protein-coding
687	chr13	113949663	113950436	+	2.8	8.49	5.7	2.46e-07	intron (NM_172595, intron 3 of 4)	intron (NM_172595, intron 3 of 4)	155541	NM_172595	218639	Mm.79837	NM_172595	ENSMUSG00000042348	Arl15	A430036I03|Arfrp2|C230032K13Rik	ADP-ribosylation factor-like 15	protein-coding
688	chr5	138768813	138769504	+	2.61	8.31	5.7	2.46e-07	intron (NM_001359593, intron 4 of 10)	intron (NM_001359593, intron 4 of 10)	14077	NM_030565	80752	Mm.320355	NM_030565	ENSMUSG00000025854	Fam20c	C76981|DMP-4|DMP4|GEF-CK|mKIAA4081	family with sequence similarity 20, member C	protein-coding
689	chr4	62727465	62728235	+	2.11	9.22	7.11	2.47e-07	Intergenic	Intergenic	53876	NM_001310706	50780	Mm.286753	NM_019492	ENSMUSG00000059810	Rgs3	4930506N09Rik|C2PA-RGS3|C2pa|PDZ-RGS3|RGS3S	regulator of G-protein signaling 3	protein-coding
690	chr7	96813016	96814278	+	2.74	8.82	6.08	2.5e-07	intron (NM_011858, intron 17 of 32)	intron (NM_011858, intron 17 of 32)	-12098	NR_045874	791381	Mm.402112	NR_045874	ENSMUSG00000053049	Gm15413	-	predicted gene 15413	ncRNA
691	chr13	6509664	6510305	+	2.66	8.17	5.5	2.53e-07	Intergenic	Intergenic	-38173	NM_001360106	69617	Mm.41933	NM_145131	ENSMUSG00000021193	Pitrm1	2310012C15Rik|AA410010|MP-1|MP1|Ntup1|PreP|mKIAA1104	pitrilysin metallepetidase 1	protein-coding
692	chr11	62943501	62943991	+	2.81	7.67	4.86	2.57e-07	Intergenic	Intergenic	-7447	NM_025496	66338	Mm.46166	NM_025496	ENSMUSG00000042200	Cdrt4	1700019I23Rik	CMT1A duplicated region transcript 4	protein-coding
693	chr11	50964913	50965362	+	-2.54	5.65	8.2	2.57e-07	Intergenic	Intergenic	-3883	NM_146910	258912	Mm.223318	NM_146910	ENSMUSG00000050343	Olfr1378	MOR129-2	olfactory receptor 1378	protein-coding
694	chr11	114229415	114230263	+	2.69	8.74	6.04	2.63e-07	Intergenic	L4_A_Mam|LINE|RTE-X	31581	NR_045930	73536	Mm.54275	NR_045930	ENSMUSG00000078600	1700092K14Rik	-	RIKEN cDNA 1700092K14 gene	ncRNA
695	chr15	94227446	94227798	+	3.23	7.34	4.11	2.66e-07	Intergenic	RMER15|LTR|ERVL	-19580	NR_045629	328594	Mm.135523	NR_045629		D630010B17Rik	Gm811	RIKEN cDNA D630010B17 gene	ncRNA
696	chr8	25143975	25144740	+	2.92	8.43	5.51	2.66e-07	Intergenic	Intergenic	14876	NR_106187	102467006		NR_106187	ENSMUSG00000099142	Mir8108	Gm27484|mmu-mir-8108	microRNA 8108	ncRNA
697	chr4	128697927	128698479	+	2.41	8.72	6.31	2.7e-07	intron (NM_018774, intron 1 of 14)	intron (NM_018774, intron 1 of 14)	9465	NM_018774	54383	Mm.473738	NM_018774	ENSMUSG00000028796	Phc2	A3galt2|AA415044|D130050K19Rik|D4Ertd810e|Edr2|Mph2|p36	polyhomeotic 2	protein-coding
698	chr10	88970924	88971436	+	2.74	8.01	5.27	2.71e-07	intron (NM_001277188, intron 24 of 27)	intron (NM_001277188, intron 24 of 27)	85188	NM_145423	216225	Mm.77381	NM_145423	ENSMUSG00000020062	Slc5a8	Ait|SMCT	solute carrier family 5 (iodide transporter), member 8	protein-coding
699	chr18	24142413	24143079	+	2.81	8.21	5.4	2.75e-07	Intergenic	Intergenic	-20927	NM_172625	225280	Mm.258973	NM_172625	ENSMUSG00000047989	Ino80c	D030070L09Rik	INO80 complex subunit C	protein-coding
700	chr15	77278903	77279183	+	3.68	7.46	3.78	2.8e-07	intron (NM_053104, intron 1 of 13)	intron (NM_053104, intron 1 of 13)	28010	NM_053104	93686	Mm.202774	NM_053104	ENSMUSG00000033565	Rbfox2	Fbm2|Fxh|Hrnbp2|Rbm9	RNA binding protein, fox-1 homolog (C. elegans) 2	protein-coding
701	chr16	65818838	65819207	+	3.09	7.51	4.42	2.81e-07	intron (NM_028572, intron 1 of 3)	intron (NM_028572, intron 1 of 3)	3389	NM_028572	73569	Mm.25670	NM_028572	ENSMUSG00000091243	Vgll3	1700110N18Rik|4832416J22|C80713|Vgl-3|Vito-2	vestigial like family member 3	protein-coding
702	chr2	85280510	85281498	+	-2.33	7.1	9.43	2.81e-07	Intergenic	Intergenic	50892	NM_001011785	257951	Mm.389304	NM_001011785	ENSMUSG00000075223	Olfr987	GA_x5J8B7TRSBM-251-3|GA_x5J8B7W531T-1241080-1240524|MOR203-7P	olfactory receptor 987	protein-coding
703	chr18	54250707	54251252	+	3.16	7.97	4.81	2.82e-07	Intergenic	Intergenic	-171316	NR_040338	77433	Mm.159919	NR_040338		Redrum	9430076G02Rik	Redrum, erythroid developmental long intergenic non-protein coding transcript	ncRNA
704	chr12	84885116	84885461	+	2.89	7.41	4.53	2.83e-07	Intergenic	Intergenic	-8793	NM_013589	16997	Mm.3900	NM_013589	ENSMUSG00000002020	Ltbp2	AW208642	latent transforming growth factor beta binding protein 2	protein-coding
705	chr12	49473377	49473840	+	2.64	7.98	5.34	2.84e-07	Intergenic	Intergenic	7254	NR_045472	69054	Mm.417838	NR_045472	ENSMUSG00000100844	1810007C17Rik	-	RIKEN cDNA 1810007C17 gene	ncRNA
706	chr17	4767978	4768457	+	2.86	7.91	5.05	2.89e-07	Intergenic	Intergenic	133237	NR_130984	75117	Mm.429393	NR_130984		4930517M08Rik	-	RIKEN cDNA 4930517M08 gene	ncRNA
707	chr8	103913043	103913547	+	3.01	7.67	4.66	2.91e-07	Intergenic	Intergenic	-188330	NM_009868	12562	Mm.21767	NM_009868	ENSMUSG00000031871	Cdh5	7B4|AA408225|Cd144|VE-Cad|VECD|VEcad|Vec	cadherin 5	protein-coding
708	chr14	31458543	31459104	+	2.9	7.75	4.86	2.97e-07	Intergenic	Intergenic	-22723	NM_011894	24056	Mm.383198	NM_011894	ENSMUSG00000021892	Sh3bp5	AI606498|SH3BP-5|Sab	SH3-domain binding protein 5 (BTK-associated)	protein-coding
709	chr12	77760904	77761381	+	2.9	7.63	4.74	2.98e-07	Intergenic	MLT1H|LTR|ERVL-MaLR	351001	NM_001252616	53618	Mm.35628	NM_016893	ENSMUSG00000021065	Fut8	-	fucosyltransferase 8	protein-coding
710	chr18	11976458	11977249	+	2.26	8.96	6.7	2.99e-07	Intergenic	ORR1F|LTR|ERVL-MaLR	-136415	NR_035447	100316686		NR_035447	ENSMUSG00000084565	Mir1901	Mirn1901|mmu-mir-1901	microRNA 1901	ncRNA
711	chr1	159029167	159029448	+	3.36	7.12	3.76	3.03e-07	Intergenic	MLT1D|LTR|ERVL-MaLR	-71869	NM_001085376	23850	Mm.458621	NM_001085376	ENSMUSG00000073530	Pappa2	PAPP-A2|PLAC3|Pappe	pappalysin 2	protein-coding
712	chr16	56885720	56886755	+	2.13	8.99	6.86	3.1e-07	promoter-TSS (NM_019631)	promoter-TSS (NM_019631)	-74	NM_019631	56277	Mm.262328	NM_019631	ENSMUSG00000022754	Tmem45a	C630002M10Rik|M32486|p19.5	transmembrane protein 45a	protein-coding
713	chr8	123146286	123146816	+	3.08	7.68	4.6	3.13e-07	intron (NM_020564, intron 5 of 6)	MamRep1151|LTR?|LTR?	11729	NM_020564	57429	Mm.6562	NM_020564	ENSMUSG00000000739	Sult5a1	Sult-x1|Sultx1	sulfotransferase family 5A, member 1	protein-coding
714	chr9	101590302	101590885	+	2.65	7.72	5.08	3.13e-07	Intergenic	MLT1I|LTR|ERVL-MaLR	248399	NR_110509	102633035	Mm.411422	NR_110509	ENSMUSG00000101941	Gm28979	-	predicted gene 28979	ncRNA
715	chr8	10928242	10929125	+	2.13	8.57	6.45	3.13e-07	promoter-TSS (NR_030715)	promoter-TSS (NR_030715)	-226	NR_135302	665306	Mm.358758	NR_030715	ENSMUSG00000038917	3930402G23Rik	-	RIKEN cDNA 3930402G23 gene	ncRNA
716	chr16	73647169	73647845	+	2.63	8.21	5.58	3.16e-07	Intergenic	Intergenic	694560	NR_030464	751561		NR_030464	ENSMUSG00000104758	Mir691	Mirn691|mir-691|mmu-mir-691	microRNA 691	ncRNA
717	chr17	45866919	45868141	+	1.95	9.1	7.15	3.16e-07	Intergenic	L2c|LINE|L2	13922	NR_152136	75154	Mm.399341	NR_152136		4930542M03Rik	-	RIKEN cDNA 4930542M03 gene	ncRNA
718	chr2	13438261	13438908	+	2.23	8.59	6.37	3.17e-07	intron (NM_001081084, intron 22 of 66)	intron (NM_001081084, intron 22 of 66)	53292	NM_001081084	65969	Mm.313915	NM_001081084	ENSMUSG00000026726	Cubn	AA408369|AL022750|D2Wsu88e	cubilin (intrinsic factor-cobalamin receptor)	protein-coding
719	chr13	42536617	42537350	+	2.53	7.99	5.46	3.18e-07	Intergenic	Intergenic	-143816	NM_001302635	218194	Mm.160124	NM_198419	ENSMUSG00000054728	Phactr1	9630030F18Rik|Rpel1	phosphatase and actin regulator 1	protein-coding
720	chr9	110400680	110401117	+	2.81	8.01	5.2	3.23e-07	intron (NM_001081043, intron 1 of 24)	ID_B1|SINE|B4	7312	NM_001081043	104831	Mm.335477	NM_001081043	ENSMUSG00000036057	Ptpn23	AI462446|PTP-TD14	protein tyrosine phosphatase, non-receptor type 23	protein-coding
721	chr8	120685150	120685638	+	2.65	7.76	5.11	3.26e-07	Intergenic	Intergenic	17074	NM_001293559	12857	Mm.386758	NM_009941	ENSMUSG00000031818	Cox4i1	AL024441|COX|COX IV-1|COXIV|Cox4|Cox4a|IV-1	cytochrome c oxidase subunit 4I1	protein-coding
722	chr10	9495171	9495753	+	-2.41	5.86	8.27	3.26e-07	Intergenic	Intergenic	179746	NM_177271	320825	Mm.101115	NM_177271	ENSMUSG00000060487	Samd5	E130306M17Rik	sterile alpha motif domain containing 5	protein-coding
723	chr8	11083952	11084582	+	3	8.13	5.13	3.34e-07	Intergenic	Intergenic	-75837	NM_001081212	384783	Mm.407207	NM_001081212	ENSMUSG00000038894	Irs2	Irs-2	insulin receptor substrate 2	protein-coding
724	chr3	115711132	115711712	+	-2.46	5.52	7.98	3.39e-07	3' UTR (NM_007901, exon 2 of 2)	3' UTR (NM_007901, exon 2 of 2)	3633	NM_007901	13609	Mm.982	NM_007901	ENSMUSG00000045092	S1pr1	AI849002|Edg1|Lpb1|S1p|S1p1	sphingosine-1-phosphate receptor 1	protein-coding
725	chr10	8658238	8658846	+	2.89	7.66	4.78	3.41e-07	Intergenic	Intergenic	-139717	NM_177387	338362	Mm.41163	NM_177387	ENSMUSG00000047712	Ust	D930010O20Rik|UA2OST	uronyl-2-sulfotransferase	protein-coding
726	chr10	122911966	122913723	+	1.86	9.55	7.69	3.41e-07	intron (NM_001110218, intron 8 of 9)	intron (NM_001110218, intron 8 of 9)	72880	NR_029527	387251		NR_029527	ENSMUSG00000065406	Mirlet7i	Mirnlet7i|let-7i|mmu-let-7i	microRNA let7i	ncRNA
727	chr8	12905289	12906830	+	-2.09	7.31	9.4	3.44e-07	Intergenic	Intergenic	-9834	NM_178076	17207	Mm.334413	NM_178076	ENSMUSG00000031442	Mcf2l	C130040G20Rik|Dbs|Ost|mKIAA0362	mcf.2 transforming sequence-like	protein-coding
728	chr18	58872555	58873038	+	2.91	7.34	4.43	3.45e-07	intron (NM_175506, intron 2 of 22)	intron (NM_175506, intron 2 of 22)	36433	NM_175506	240322	Mm.71963	NM_175506	ENSMUSG00000053441	Adamts19	4831407I23Rik|AU015154|D230034E10Rik	a disintegrin-like and metallopeptidase (reprolysin type) with thrombospondin type 1 motif, 19	protein-coding
729	chr13	60417181	60418022	+	2.64	8.33	5.69	3.45e-07	Intergenic	Intergenic	-184346	NM_001285917	69635	Mm.24103	NM_029653	ENSMUSG00000021559	Dapk1	D13Ucla1|DAP-Kinase	death associated protein kinase 1	protein-coding
730	chr1	135538385	135539097	+	2.51	8.17	5.66	3.46e-07	intron (NM_173437, intron 1 of 28)	intron (NM_173437, intron 1 of 28)	46614	NM_173437	215690	Mm.34977	NM_173437	ENSMUSG00000009418	Nav1	9530089B19|9930003A20Rik|C230080M11Rik|Gm38399|Pomfil3|Unc53h1|mKIAA1151|steerin-1	neuron navigator 1	protein-coding
731	chr2	44985045	44985536	+	2.89	7.68	4.8	3.51e-07	3' UTR (NM_001355289, exon 11 of 11)	3' UTR (NM_001355289, exon 11 of 11)	37887	NR_039591	100628598		NR_039591	ENSMUSG00000092679	Mir5129	mir-5129|mmu-mir-5129|mu-mir-5129	microRNA 5129	ncRNA
732	chr6	53801851	53802345	+	2.4	8.34	5.93	3.51e-07	Intergenic	Intergenic	18727	NM_025817	66873	Mm.422727	NM_025817	ENSMUSG00000043496	Tril	1200009O22Rik|AI316813|mKIAA0644	TLR4 interactor with leucine-rich repeats	protein-coding
733	chr4	98105705	98106587	+	-2.1	6.46	8.56	3.52e-07	intron (NM_010905, intron 10 of 10)	intron (NM_010905, intron 10 of 10)	277119	NM_053157	94043	Mm.331719	NM_053157	ENSMUSG00000028563	Tm2d1	2310026L18Rik|AA990549|Bbp	TM2 domain containing 1	protein-coding
734	chr4	150784373	150785566	+	2.11	9.48	7.37	3.53e-07	Intergenic	Intergenic	-68827	NM_001356323	74155	Mm.318841	NM_133753	ENSMUSG00000028967	Errfi1	1300002F13Rik|AI788755|Mig-6|Mig6|RALT	ERBB receptor feedback inhibitor 1	protein-coding
735	chr10	17212990	17213671	+	3.23	8.15	4.92	3.55e-07	Intergenic	Intergenic	-117548	NR_038020	100504235	Mm.84044	NR_038020	ENSMUSG00000101969	Gm20125	-	predicted gene, 20125	ncRNA
736	chr11	99141581	99142015	+	2.92	7.75	4.83	3.6e-07	Intergenic	MIR|SINE|MIR	13279	NM_007719	12775	Mm.2932	NM_007719	ENSMUSG00000037944	Ccr7	CC-CKR-7|CCR-7|CD197|Cdw197|Cmkbr7|EBI1|Ebi1h	chemokine (C-C motif) receptor 7	protein-coding
737	chr10	71195340	71196178	+	3.13	8.12	4.99	3.61e-07	Intergenic	MLT1A1|LTR|ERVL-MaLR	-5986	NR_131003	78638	Mm.71171	NR_131003	ENSMUSG00000112028	1700113B09Rik	-	RIKEN cDNA 1700113B09 gene	ncRNA
738	chr2	167358420	167359015	+	2.65	7.74	5.1	3.61e-07	Intergenic	RMER5|LTR|ERV1	-9539	NM_019835	56336	Mm.200886	NM_019835	ENSMUSG00000017929	B4galt5	9430078I07Rik|AW049941|AW539721	UDP-Gal:betaGlcNAc beta 1,4-galactosyltransferase, polypeptide 5	protein-coding
739	chr13	53788693	53789140	+	3.16	7.41	4.26	3.62e-07	Intergenic	Intergenic	126832	NR_152124	78550	Mm.160095	NR_152124		E130119H09Rik	-	RIKEN cDNA E130119H09 gene	ncRNA
740	chr4	58184575	58185351	+	2.64	8.16	5.52	3.64e-07	intron (NM_022814, intron 1 of 47)	intron (NM_022814, intron 1 of 47)	21633	NM_022814	64817	Mm.261024	NM_022814	ENSMUSG00000028369	Svep1	1110021D17Rik|4833413O10Rik|AA387071|D430029O09Rik|Polydom	sushi, von Willebrand factor type A, EGF and pentraxin domain containing 1	protein-coding
741	chr13	52587797	52588139	+	3.22	7.42	4.2	3.67e-07	intron (NM_001198977, intron 1 of 13)	MLT1A1|LTR|ERVL-MaLR	4531	NM_001198977	20963	Mm.375031	NM_011518	ENSMUSG00000021457	Syk	Sykb	spleen tyrosine kinase	protein-coding
742	chr2	31348412	31349065	+	2.68	7.85	5.17	3.67e-07	Intergenic	Intergenic	102815	NM_019681	14299	Mm.249318	NM_019681	ENSMUSG00000062661	Ncs1	9430075O15Rik|A730032G13Rik|AI836659|Freq|Mfreq|NCS-1	neuronal calcium sensor 1	protein-coding
743	chr2	32319406	32320596	+	2.71	8.53	5.83	3.69e-07	intron (NM_010065, intron 14 of 20)	intron (NM_010065, intron 14 of 20)	1541	NR_029811	387239		NR_029811	ENSMUSG00000092807	Mir199b	Mirn199b|mir-199b	microRNA 199b	ncRNA
744	chr9	121903524	121904414	+	2.44	8.24	5.79	3.7e-07	intron (NM_001276719, intron 2 of 3)	intron (NM_001276719, intron 2 of 3)	5614	NM_021609	59289	Mm.258105	NM_021609	ENSMUSG00000044534	Ackr2	AI464239|CCR10|CCR9|Ccbp2|Cmkbr9|D6	atypical chemokine receptor 2	protein-coding
745	chr17	7653955	7654686	+	2.59	7.99	5.41	3.74e-07	Intergenic	Intergenic	150654	NM_001081416	68655	Mm.379161	NM_001081416	ENSMUSG00000071984	Fndc1	1110027O12Rik|1110051A18Rik|mKIAA1866	fibronectin type III domain containing 1	protein-coding
746	chr17	68158258	68158814	+	3.14	8.39	5.25	3.77e-07	Intergenic	Intergenic	-115261	NM_177278	320858	Mm.137356	NM_177278	ENSMUSG00000041565	L3mbtl4	A730037L19Rik|D930040M24Rik	L3MBTL4 histone methyl-lysine binding protein	protein-coding
747	chr2	166102491	166103648	+	2.9	8.85	5.95	3.77e-07	intron (NM_001252579, intron 3 of 20)	intron (NM_001252579, intron 3 of 20)	52216	NM_001252578	72043	Mm.1011	NM_028072	ENSMUSG00000006800	Sulf2	2010004N24Rik|AU020235|MSulf-2|mKIAA1247	sulfatase 2	protein-coding
748	chr13	89828478	89829031	+	2.69	8.05	5.36	3.77e-07	Intergenic	Intergenic	-86242	NM_019389	13003	Mm.158700	NM_019389	ENSMUSG00000021614	Vcan	5430420N07Rik|9430051N09|Cspg2|DPEAAE|NG2|PG-M|PG-M(V0)|PG-M(V1)|hdf	versican	protein-coding
749	chr11	90326681	90327340	+	2.57	8.13	5.56	3.77e-07	Intergenic	Intergenic	63907	NM_172563	217082	Mm.158903	NM_172563	ENSMUSG00000003949	Hlf	E230015K02Rik	hepatic leukemia factor	protein-coding
750	chr4	56284548	56284927	+	3.61	6.75	3.14	3.79e-07	Intergenic	Intergenic	456688	NM_025271	11471	Mm.251434	NM_025271	ENSMUSG00000070980	Actl7b	Gm26657|Tact1	actin-like 7b	protein-coding
751	chr9	102977664	102978632	+	2.6	8.91	6.31	3.79e-07	Intergenic	Intergenic	-30341	NM_033314	24059	Mm.207106	NM_033314	ENSMUSG00000032548	Slco2a1	2310021C19Rik|Pgt|Slc21a2|mPgt	solute carrier organic anion transporter family, member 2a1	protein-coding
752	chr17	4734367	4734938	+	3.08	7.99	4.92	3.83e-07	Intergenic	Intergenic	99672	NR_130984	75117	Mm.429393	NR_130984		4930517M08Rik	-	RIKEN cDNA 4930517M08 gene	ncRNA
753	chr6	72593370	72593894	+	2.7	8.12	5.42	3.83e-07	intron (NM_001253692, intron 2 of 11)	intron (NM_001253692, intron 2 of 11)	4781	NM_144917	232089	Mm.167232	NM_144917	ENSMUSG00000056698	Elmod3	AI844780|C330008I15Rik|RBM29|Rbed1	ELMO/CED-12 domain containing 3	protein-coding
754	chr6	127555613	127556086	+	2.87	7.74	4.87	3.93e-07	Intergenic	Intergenic	-22126	NM_001033464	381812	Mm.296093	NM_001033464	ENSMUSG00000061414	Cracr2a	Efcab4b|Gm1073|Gm462	calcium release activated channel regulator 2A	protein-coding
755	chr1	135593887	135594516	+	2.78	8.19	5.41	3.93e-07	Intergenic	Intergenic	-3575	NR_151586	215714	Mm.472859	NM_175447		Gm4793	EG215714	predicted gene 4793	ncRNA
756	chr15	63364487	63365138	+	2.54	8.51	5.97	3.98e-07	Intergenic	Intergenic	114796	NR_045279	432958	Mm.255105	NR_045279	ENSMUSG00000115520	Gm20740	-	predicted gene, 20740	ncRNA
757	chr8	104100761	104102211	+	-1.9	7.38	9.28	3.98e-07	promoter-TSS (NM_009868)	promoter-TSS (NM_009868)	-139	NM_009868	12562	Mm.21767	NM_009868	ENSMUSG00000031871	Cdh5	7B4|AA408225|Cd144|VE-Cad|VECD|VEcad|Vec	cadherin 5	protein-coding
758	chr1	170006458	170007016	+	3.02	7.78	4.76	4.01e-07	intron (NM_022563, intron 3 of 16)	intron (NM_022563, intron 3 of 16)	37328	NR_040438	67303	Mm.396611	NR_040438	ENSMUSG00000097503	3110045C21Rik	AI838577	RIKEN cDNA 3110045C21 gene	ncRNA
759	chr5	135672809	135673507	+	2.79	8.53	5.75	4.01e-07	Intergenic	Intergenic	-15987	NM_008898	18984	Mm.3863	NM_008898	ENSMUSG00000005514	Por	4933424M13Rik|CPR|CYPOR|P450R	P450 (cytochrome) oxidoreductase	protein-coding
760	chr6	100800382	100801115	+	2.54	8.17	5.62	4.01e-07	intron (NM_198612, intron 6 of 6)	intron (NM_198612, intron 6 of 6)	-32890	NM_182939	232314	Mm.27223	NM_182939	ENSMUSG00000052144	Ppp4r2	BE691708|C230060M08Rik	protein phosphatase 4, regulatory subunit 2	protein-coding
761	chr1	186197094	186197425	+	3.11	7.2	4.09	4.02e-07	Intergenic	Lx9|LINE|L1	-79949	NM_146106	226791	Mm.257116	NM_146106	ENSMUSG00000039246	Lyplal1	BC027340|Q96AVO	lysophospholipase-like 1	protein-coding
762	chr6	137487431	137487876	+	3.02	8.07	5.04	4.04e-07	intron (NM_001271589, intron 11 of 13)	intron (NM_001271589, intron 11 of 13)	32242	NM_001271589	13860	Mm.235346	NM_007945	ENSMUSG00000015766	Eps8	AW261790	epidermal growth factor receptor pathway substrate 8	protein-coding
763	chr3	151977762	151978595	+	3	8.35	5.35	4.07e-07	Intergenic	Intergenic	-140650	NM_008966	19220	Mm.331442	NM_008966	ENSMUSG00000028036	Ptgfr	AI957154|PGF|fp	prostaglandin F receptor	protein-coding
764	chr5	127374020	127374629	+	2.96	7.67	4.71	4.07e-07	intron (NM_175432, intron 2 of 8)	intron (NM_175432, intron 2 of 8)	-92701	NR_038128	67351	Mm.320172	NR_038127	ENSMUSG00000087104	Tmem132cos	1700085B03Rik	transmembrane protein 132C, opposite strand	ncRNA
765	chr10	63880239	63881129	+	2.02	8.93	6.91	4.07e-07	intron (NM_001164376, intron 7 of 17)	intron (NM_001164376, intron 7 of 17)	59629	NM_001164519	216033	Mm.444692	NM_177612	ENSMUSG00000060843	Ctnna3	4930429L08Rik|4933408A16|Catna3|Vr22	catenin (cadherin associated protein), alpha 3	protein-coding
766	chr14	73410159	73410437	+	3.92	6.83	2.91	4.08e-07	Intergenic	Intergenic	-25009	NM_008410	16432	Mm.4266	NM_008410	ENSMUSG00000022108	Itm2b	AI256040|Bri|Bri2|Bricd2b|D14Sel6|E25BMM|imBRI2	integral membrane protein 2B	protein-coding
767	chr7	36596534	36597277	+	3.12	8.2	5.08	4.08e-07	Intergenic	Intergenic	-101213	NM_172298	243931	Mm.44141	NM_172298	ENSMUSG00000021217	Tshz3	A630038G13Rik|Tsh3|Zfp537|mKIAA1474|teashirt3	teashirt zinc finger family member 3	protein-coding
768	chr9	43801532	43802322	+	1.73	9.13	7.4	4.08e-07	intron (NM_021424, intron 5 of 5)	intron (NM_021424, intron 5 of 5)	57351	NM_021424	58235	Mm.335096	NM_021424	ENSMUSG00000032012	Nectin1	AI835281|AW549174|Cd111|HIgR|HveC|PRR|PRR1|Pvrl1|nectin-1	nectin cell adhesion molecule 1	protein-coding
769	chr4	58331286	58331737	+	3.47	7.18	3.72	4.1e-07	intron (NM_001037128, intron 6 of 14)	intron (NM_001037128, intron 6 of 14)	45549	NM_001165996	18198	Mm.16148	NM_010944	ENSMUSG00000057280	Musk	Mdk4|Mlk|Nsk1|Nsk2|Nsk3	muscle, skeletal, receptor tyrosine kinase	protein-coding
770	chr4	9287246	9287726	+	2.8	7.95	5.15	4.11e-07	intron (NM_001355183, intron 2 of 5)	intron (NM_001355183, intron 2 of 5)	18169	NM_028940	74438	Mm.473368	NM_028940	ENSMUSG00000041216	Clvs1	4933402J24Rik|Clvl1|Rlbp1l1	clavesin 1	protein-coding
771	chr2	159708039	159708579	+	2.6	8.13	5.53	4.14e-07	Intergenic	Intergenic	-239032	NR_040498	71081	Mm.383491	NR_040498	ENSMUSG00000085198	4933416E03Rik	-	RIKEN cDNA 4933416E03 gene	ncRNA
772	chr6	87564951	87565582	+	2.96	7.61	4.65	4.15e-07	Intergenic	Intergenic	25477	NM_021381	58182	Mm.333226	NM_021381	ENSMUSG00000049409	Prokr1	EG-VEGFR1|Gpr73|Pk-r1|Pkr1	prokineticin receptor 1	protein-coding
773	chr4	100401552	100402545	+	2.28	8.52	6.24	4.15e-07	intron (NM_013845, intron 4 of 8)	intron (NM_013845, intron 4 of 8)	-76819	NM_001033773	381534	Mm.318133	NM_001033773	ENSMUSG00000069733	Ube2u	-	ubiquitin-conjugating enzyme E2U (putative)	protein-coding
774	chr1	73309411	73309944	+	3.27	7.56	4.29	4.16e-07	Intergenic	Intergenic	-89291	NR_040605	78718	Mm.244075	NR_040605	ENSMUSG00000101812	D530049I02Rik	-	RIKEN cDNA D530049I02 gene	ncRNA
775	chr1	72909259	72909744	+	3.19	7.32	4.13	4.18e-07	Intergenic	Intergenic	-34636	NM_010518	16011	Mm.405761	NM_010518	ENSMUSG00000026185	Igfbp5	AI256729|AW208790|IGFBP-5|IGFBP-5P	insulin-like growth factor binding protein 5	protein-coding
776	chr12	69450883	69451754	+	2.53	8.44	5.92	4.2e-07	Intergenic	Intergenic	24232	NR_038060	76062	Mm.380755	NR_038060	ENSMUSG00000113035	5830428M24Rik	100040862|Gm3007	RIKEN cDNA 5830428M24 gene	ncRNA
777	chr12	75304128	75304779	+	2.38	8.77	6.38	4.2e-07	Intergenic	Intergenic	-3860	NM_023275	80837	Mm.27467	NM_023275	ENSMUSG00000046768	Rhoj	1110005O19Rik|AW210585|Arhj|TC10L|TCL	ras homolog family member J	protein-coding
778	chr15	67301768	67302367	+	2.25	8.93	6.68	4.2e-07	intron (NR_045140, intron 5 of 8)	intron (NR_045140, intron 5 of 8)	75298	NR_045140	69334	Mm.63770	NR_045140	ENSMUSG00000102069	1700012I11Rik	-	RIKEN cDNA 1700012I11 gene	ncRNA
779	chr10	41550737	41551050	+	3.6	6.97	3.37	4.23e-07	exon (NM_001358562, exon 44 of 48)	exon (NM_001358562, exon 44 of 48)	-17123	NR_045341	70538	Mm.399807	NR_045341	ENSMUSG00000091370	5730435O14Rik	-	RIKEN cDNA 5730435O14 gene	ncRNA
780	chr14	32738638	32738995	+	3.23	7.53	4.3	4.23e-07	Intergenic	Intergenic	-47147	NM_001163616	69069	Mm.261609	NM_001163616	ENSMUSG00000041707	1810011H11Rik	4733401I05Rik	RIKEN cDNA 1810011H11 gene	protein-coding
781	chr11	50621493	50622943	+	2.21	8.98	6.77	4.23e-07	intron (NM_175643, intron 2 of 21)	intron (NM_175643, intron 2 of 21)	20133	NM_175643	216725	Mm.110597	NM_175643	ENSMUSG00000036545	Adamts2	ADAM-TS 2|ADAM-TS2|ADAMTS-2|PC I-NP|PCINP|pNPI	a disintegrin-like and metallopeptidase (reprolysin type) with thrombospondin type 1 motif, 2	protein-coding
782	chr4	141704623	141705044	+	2.81	7.69	4.88	4.24e-07	intron (NM_001017966, intron 4 of 9)	intron (NM_001017966, intron 4 of 9)	18586	NM_001017966	68817	Mm.393721	NM_001017966	ENSMUSG00000078515	Ddi2	1110056G13Rik|1700027M01Rik|9130022E05Rik|AI604911|AU040698	DNA-damage inducible protein 2	protein-coding
783	chr6	53531434	53531879	+	2.6	7.58	4.98	4.24e-07	intron (NM_001327821, intron 5 of 10)	intron (NM_001327821, intron 5 of 10)	-41718	NM_172728	231991	Mm.227444	NM_172728	ENSMUSG00000053007	Creb5	9430076C15Rik|CRE-BPa|Crebpa|D430026C09Rik	cAMP responsive element binding protein 5	protein-coding
784	chr1	131547123	131547612	+	3.07	7.64	4.57	4.33e-07	Intergenic	Intergenic	19464	NM_175382	108900	Mm.31278	NM_175382	ENSMUSG00000055184	Fam72a	2700049P18Rik|P17	family with sequence similarity 72, member A	protein-coding
785	chr2	137067590	137068260	+	2.45	8.51	6.05	4.34e-07	exon (NM_028201, exon 6 of 6)	exon (NM_028201, exon 6 of 6)	48595	NM_013822	16449	Mm.22398	NM_013822	ENSMUSG00000027276	Jag1	ABE2|Gsfabe2|Htu|Ozz|Ser-1	jagged 1	protein-coding
786	chr8	93180359	93181383	+	2.45	8.84	6.39	4.36e-07	intron (NM_053200, intron 8 of 13)	intron (NM_053200, intron 8 of 13)	16933	NM_053200	104158	Mm.292803	NM_053200	ENSMUSG00000056973	Ces1d	Ces3|TGH	carboxylesterase 1D	protein-coding
787	chr3	102667650	102668892	+	2.45	8.39	5.94	4.38e-07	Intergenic	Intergenic	-66499	NM_027533	70747	Mm.27469	NM_027533	ENSMUSG00000027858	Tspan2	6330415F13Rik|B230119D02Rik|tspan-2	tetraspanin 2	protein-coding
788	chr19	7103306	7104574	+	1.94	8.82	6.88	4.39e-07	intron (NM_201411, intron 1 of 1)	intron (NM_201411, intron 1 of 1)	1789	NM_201411	396184	Mm.386930	NM_201411	ENSMUSG00000047787	Flrt1	AW742165|D630040I23Rik	fibronectin leucine rich transmembrane protein 1	protein-coding
789	chr12	70579266	70579732	+	3.03	7.27	4.23	4.47e-07	intron (NR_037248, intron 4 of 4)	intron (NR_037248, intron 4 of 4)	126345	NM_028339	72736	Mm.204670	NM_028339	ENSMUSG00000021072	Tmx1	2810425A04Rik|AI465319|Txndc1	thioredoxin-related transmembrane protein 1	protein-coding
790	chr13	97859015	97859401	+	2.92	7.23	4.32	4.54e-07	Intergenic	Intergenic	108096	NR_152263	111365222	Mm.440079	NR_152263		Eyelinc18	-	uncharacterized EyeLinc18	ncRNA
791	chr10	37170438	37171223	+	2.82	7.99	5.17	4.55e-07	Intergenic	Intergenic	-31904	NM_008538	17118	Mm.30059	NM_008538	ENSMUSG00000069662	Marcks	Macs|PKCSL	myristoylated alanine rich protein kinase C substrate	protein-coding
792	chr2	72554627	72555479	+	2.66	8.19	5.53	4.55e-07	Intergenic	Intergenic	78834	NM_025866	66953	Mm.270676	NM_025866	ENSMUSG00000055612	Cdca7	2310021G01Rik|AU044109|JPO1	cell division cycle associated 7	protein-coding
793	chr10	27387474	27388067	+	3.08	7.93	4.86	4.6e-07	intron (NM_008481, intron 4 of 63)	intron (NM_008481, intron 4 of 63)	-2096	NR_131034	75855	Mm.402080	NR_131034	ENSMUSG00000101636	4930579H20Rik	-	RIKEN cDNA 4930579H20 gene	ncRNA
794	chr5	118664074	118664385	+	2.87	7.84	4.97	4.6e-07	intron (NM_001347445, intron 2 of 30)	intron (NM_001347445, intron 2 of 30)	103510	NM_001347445	76199	Mm.206238	NM_172424	ENSMUSG00000018076	Med13l	2210413I17Rik|6330591G05Rik|9030618F05Rik|Thrap2|Trap240L|mKIAA1025	mediator complex subunit 13-like	protein-coding
795	chr13	45627055	45627997	+	2.02	8.97	6.95	4.61e-07	intron (NM_001199304, intron 5 of 6)	intron (NM_001199304, intron 5 of 6)	120082	NM_025508	66355	Mm.290802	NM_025508	ENSMUSG00000000253	Gmpr	2310004P21Rik|AV028449|GMPR 1	guanosine monophosphate reductase	protein-coding
796	chr9	67549031	67550040	+	2.01	9.1	7.09	4.61e-07	intron (NM_001081242, intron 1 of 57)	intron (NM_001081242, intron 1 of 57)	10168	NM_001081242	70549	Mm.33645	NM_027458	ENSMUSG00000052698	Tln2	5730421P04Rik|AI507121|AI787438|AL118320|mKIAA0320	talin 2	protein-coding
797	chr17	7620895	7621626	+	2.41	8	5.59	4.65e-07	Intergenic	Intergenic	183714	NM_001081416	68655	Mm.379161	NM_001081416	ENSMUSG00000071984	Fndc1	1110027O12Rik|1110051A18Rik|mKIAA1866	fibronectin type III domain containing 1	protein-coding
798	chr7	89850508	89851235	+	2.64	7.8	5.15	4.67e-07	intron (NM_181407, intron 13 of 13)	intron (NM_181407, intron 13 of 13)	52758	NM_001162979	70884	Mm.252823	NM_001162979	ENSMUSG00000039391	Ccdc81	4921513D09Rik	coiled-coil domain containing 81	protein-coding
799	chr6	32179680	32179994	+	3.44	7.19	3.75	4.7e-07	intron (NM_175750, intron 24 of 31)	intron (NM_175750, intron 24 of 31)	129549	NM_029587	76382	Mm.23510	NM_029587	ENSMUSG00000029766	1700012A03Rik	AI429084	RIKEN cDNA 1700012A03 gene	protein-coding
800	chr4	63275189	63275796	+	2.86	8.01	5.15	4.75e-07	intron (NM_025685, intron 16 of 60)	Tigger15a|DNA|TcMar-Tigger	18641	NR_030477	735262		NR_030477	ENSMUSG00000070102	Mir455	Mirn455|mir-455|mmu-mir-455	microRNA 455	ncRNA
801	chr12	110206749	110207424	+	2.74	7.72	4.98	4.75e-07	Intergenic	Intergenic	-49013	NR_045466	67280	Mm.390495	NR_045466	ENSMUSG00000113331	3110009F21Rik	-	RIKEN cDNA 3110009F21 gene	ncRNA
802	chr15	52967674	52968436	+	2.25	8.77	6.52	4.78e-07	Intergenic	Intergenic	255610	NM_027212	69790	Mm.195562	NM_027212	ENSMUSG00000038622	Med30	1810038N03Rik|2510044J04Rik|TRAP25|Thrap6	mediator complex subunit 30	protein-coding
803	chr7	110753891	110754384	+	3.09	7.72	4.63	4.8e-07	Intergenic	Intergenic	-14069	NM_001276301	11717	Mm.3238	NM_009667	ENSMUSG00000005686	Ampd3	-	adenosine monophosphate deaminase 3	protein-coding
804	chr7	78079563	78080076	+	2.77	7.35	4.59	4.86e-07	Intergenic	MTEa|LTR|ERVL-MaLR	498019	NM_182809	18213	Mm.33496	NM_008746	ENSMUSG00000059146	Ntrk3	AW125844|Ntrk3_tv3|TrkC	neurotrophic tyrosine kinase, receptor, type 3	protein-coding
805	chr3	55307515	55307894	+	2.75	7.96	5.21	4.86e-07	intron (NM_001357475, intron 3 of 16)	intron (NM_001357475, intron 3 of 16)	65340	NM_001111053	13175	Mm.393242	NM_019978	ENSMUSG00000027797	Dclk1	1700113D08Rik|2810480F11Rik|AI836758|Click-I|Cpg16|Dcamkl1|Dcl|Dclk|mKIAA0369	doublecortin-like kinase 1	protein-coding
806	chr3	38235046	38236038	+	2.36	8.69	6.33	4.86e-07	Intergenic	Intergenic	-27423	NR_040541	71342	Mm.410782	NR_040541	ENSMUSG00000106002	5430434I15Rik	-	RIKEN cDNA 5430434I15 gene	ncRNA
807	chr3	18634874	18635205	+	3.1	7.49	4.39	4.88e-07	Intergenic	Intergenic	-154562	NR_040544	73959	Mm.60616	NR_040544	ENSMUSG00000102699	4930433B08Rik	-	RIKEN cDNA 4930433B08 gene	ncRNA
808	chr1	4491645	4493917	+	-1.9	7.53	9.43	4.92e-07	intron (NM_001289466, intron 3 of 3)	CpG	4573	NM_001289464	20671	Mm.279103	NM_011441	ENSMUSG00000025902	Sox17	-	SRY (sex determining region Y)-box 17	protein-coding
809	chr9	96844748	96845256	+	2.36	8.07	5.71	4.93e-07	intron (NM_153420, intron 3 of 6)	intron (NM_153420, intron 3 of 6)	44472	NM_001289645	235534	Mm.233031	NM_153420	ENSMUSG00000043587	Pxylp1	9430094M07Rik|Acpl2|BB177120|C130099A20Rik	2-phosphoxylose phosphatase 1	protein-coding
810	chr1	11990061	11990675	+	2.6	7.69	5.09	4.94e-07	Intergenic	Intergenic	-435618	NR_105759	102465961		NR_105759	ENSMUSG00000098555	Mir6341	Gm27262|mmu-mir-6341	microRNA 6341	ncRNA
811	chr15	32944056	32944360	+	3.08	7.9	4.83	4.96e-07	intron (NM_008304, intron 1 of 4)	intron (NM_008304, intron 1 of 4)	23485	NM_008304	15529	Mm.234266	NM_008304	ENSMUSG00000022261	Sdc2	4833414L08Rik|AA960457|Hspg1|Synd2|syndecan-2	syndecan 2	protein-coding
812	chr9	66151982	66152502	+	-2.64	4.54	7.18	4.96e-07	Intergenic	Intergenic	-5984	NM_010019	13143	Mm.304472	NM_010019	ENSMUSG00000032380	Dapk2	-	death-associated protein kinase 2	protein-coding
813	chr4	47638585	47639440	+	2.43	8.16	5.74	4.97e-07	Intergenic	Intergenic	164351	NM_024171	66212	Mm.20188	NM_024171	ENSMUSG00000053317	Sec61b	1190006C12Rik|AI326121|AW122942	Sec61 beta subunit	protein-coding
814	chr18	66652317	66652895	+	3.3	7.28	3.98	4.99e-07	Intergenic	Intergenic	148428	NR_040528	100503565	Mm.98256	NR_040528		Gm9926	-	predicted gene 9926	ncRNA
815	chr13	41910685	41911095	+	3.23	7.5	4.27	5.04e-07	intron (NR_033545, intron 4 of 6)	PB1D7|SINE|Alu	44975	NR_033545	100038577	Mm.387093	NR_033545	ENSMUSG00000113856	Gm10790	-	predicted gene 10790	ncRNA
816	chr4	149846719	149847756	+	2.37	8.71	6.34	5.04e-07	Intergenic	Intergenic	-72970	NM_027460	70556	Mm.41877	NM_027460	ENSMUSG00000028982	Slc25a33	5730438N18Rik|Pnc1	solute carrier family 25, member 33	protein-coding
817	chr6	37418843	37420035	+	1.9	9.53	7.63	5.06e-07	intron (NM_178661, intron 1 of 11)	intron (NM_178661, intron 1 of 11)	22709	NM_178661	208647	Mm.169929	NM_178661	ENSMUSG00000038648	Creb3l2	BBF2H7|C530025K05Rik|SCIRR69	cAMP responsive element binding protein 3-like 2	protein-coding
818	chr7	98795681	98795985	+	3.36	7.27	3.91	5.08e-07	Intergenic	HERVL74-int|LTR|ERVL	-39279	NM_001285792	22411	Mm.22182	NM_009519	ENSMUSG00000015957	Wnt11	-	wingless-type MMTV integration site family, member 11	protein-coding
819	chr8	23511175	23512165	+	2.61	8.59	5.98	5.08e-07	Intergenic	Intergenic	100168	NM_013834	20377	Mm.281691	NM_013834	ENSMUSG00000031548	Sfrp1	2210415K03Rik|AW011917|AW107218|AW742929|sFRP-1	secreted frizzled-related protein 1	protein-coding
820	chr13	80949062	80949781	+	2.6	8.6	6.01	5.1e-07	TTS (NR_103550)	TTS (NR_103550)	9018	NR_103550	71416	Mm.415500	NR_103550		5430425K12Rik	-	RIKEN cDNA 5430425K12 gene	ncRNA
821	chr4	58477720	58478080	+	3.59	7.06	3.47	5.12e-07	intron (NM_172989, intron 3 of 3)	intron (NM_172989, intron 3 of 3)	21503	NM_001290486	14745	Mm.4772	NM_010336	ENSMUSG00000038668	Lpar1	AI326300|Edg2|Gpcr26|Kdt2|lpA1|vzg-1	lysophosphatidic acid receptor 1	protein-coding
822	chr6	37390853	37391842	+	2.3	9.19	6.89	5.12e-07	intron (NM_178661, intron 1 of 11)	intron (NM_178661, intron 1 of 11)	50801	NM_178661	208647	Mm.169929	NM_178661	ENSMUSG00000038648	Creb3l2	BBF2H7|C530025K05Rik|SCIRR69	cAMP responsive element binding protein 3-like 2	protein-coding
823	chr2	15538544	15539019	+	-2.62	5.84	8.45	5.12e-07	intron (NM_001310455, intron 1 of 38)	intron (NM_001310455, intron 1 of 38)	12302	NM_001310455	102635496		NM_001310455	ENSMUSG00000075520	Malrd1	Diet1|Gm13318|Gm13364	MAM and LDL receptor class A domain containing 1	protein-coding
824	chr9	61427919	61428420	+	3.26	7.52	4.26	5.25e-07	Intergenic	Intergenic	55803	NM_001083927	21887	Mm.24255	NM_009389	ENSMUSG00000032280	Tle3	2610103N05Rik|ESG|Grg3a|Grg3b|mKIAA1547	transducin-like enhancer of split 3	protein-coding
825	chr1	185535162	185535773	+	2.62	7.75	5.13	5.25e-07	Intergenic	Intergenic	-1869	NR_030555	100124483		NR_030555	ENSMUSG00000076976	Mir297c	Mirn297c	microRNA 297c	ncRNA
826	chr13	13485546	13486191	+	2.64	7.79	5.15	5.26e-07	intron (NM_010917, intron 9 of 19)	intron (NM_010917, intron 9 of 19)	48266	NM_010917	18073	Mm.4691	NM_010917	ENSMUSG00000005397	Nid1	A630025O17|Nid|entactin|entactin-1|nidogen-1	nidogen 1	protein-coding
827	chr4	84198960	84199803	+	2.82	8.6	5.78	5.28e-07	Intergenic	Intergenic	-154502	NR_130998	78238	Mm.243903	NR_130998	ENSMUSG00000085217	6030471H07Rik	-	RIKEN cDNA 6030471H07 gene	ncRNA
828	chr5	29864048	29864815	+	2.26	8.88	6.63	5.28e-07	Intergenic	Intergenic	-128495	NR_028426	332993	Mm.473746	NR_028426		Gm5129	EG332993	predicted gene 5129	ncRNA
829	chr9	43126918	43127856	+	1.75	9.28	7.53	5.28e-07	exon (NM_011139, exon 12 of 13)	exon (NM_011139, exon 12 of 13)	-10817	NR_153341	235300	Mm.261326	NM_001034863	ENSMUSG00000048503	Tmem136	AA396355|Gm184	transmembrane protein 136	protein-coding
830	chr18	66229645	66230096	+	3.14	7.49	4.35	5.33e-07	intron (NM_178793, intron 2 of 10)	MLT1C|LTR|ERVL-MaLR	-10537	NR_030467	751558		NR_030467	ENSMUSG00000076147	Mir694	Mirn694|mir-694|mmu-mir-694	microRNA 694	ncRNA
831	chr18	69118231	69119059	+	2.38	8.92	6.54	5.4e-07	Intergenic	Intergenic	-96372	NR_105780	102465187		NR_105780	ENSMUSG00000098366	Mir145b	Gm27644|mmu-mir-145b	microRNA 145b	ncRNA
832	chr8	93599382	93600402	+	2.81	8.67	5.86	5.54e-07	Intergenic	Intergenic	-64185	NM_001003951	67935	Mm.65457	NM_001003951	ENSMUSG00000058019	Ces5a	1700081L16Rik|1700122C07Rik|BB081581|Ces7|Gm503|cauxin	carboxylesterase 5A	protein-coding
833	chr14	46296240	46296623	+	2.76	7.99	5.23	5.54e-07	Intergenic	LTR16A|LTR|ERVL	-83093	NR_037981	100041724	Mm.383311	NM_001099324	ENSMUSG00000079261	Gm15217	-	predicted gene 15217	ncRNA
834	chr16	57863070	57863856	+	2.52	8.12	5.6	5.57e-07	Intergenic	Intergenic	-108726	NM_007739	12837	Mm.130388	NM_007739	ENSMUSG00000068196	Col8a1	Col8a-1	collagen, type VIII, alpha 1	protein-coding
835	chr9	30552679	30553136	+	2.93	7.31	4.38	5.63e-07	Intergenic	Intergenic	125578	NM_028874	102607	Mm.35084	NM_028874	ENSMUSG00000031993	Snx19	3526401K03Rik|AI195321|AI848208|mKIAA0254	sorting nexin 19	protein-coding
836	chr2	80038547	80039371	+	2.48	8.66	6.17	5.66e-07	promoter-TSS (NM_001355142)	promoter-TSS (NM_001355142)	-57	NM_001355142	18573	Mm.40678	NM_016744	ENSMUSG00000059173	Pde1a	AI987702|AW125737	phosphodiesterase 1A, calmodulin-dependent	protein-coding
837	chr16	85898269	85899059	+	2.4	8.33	5.92	5.66e-07	intron (NM_011782, intron 1 of 7)	intron (NM_011782, intron 1 of 7)	2461	NM_011782	23794	Mm.112933	NM_011782	ENSMUSG00000022894	Adamts5	9530092O11Rik|ADAM-TS5|ADAMTS1|ADAMTS11|ADMP-2|AI481094|ASMP-2	a disintegrin-like and metallopeptidase (reprolysin type) with thrombospondin type 1 motif, 5 (aggrecanase-2)	protein-coding
838	chr6	13746911	13747427	+	3.13	7.3	4.17	5.69e-07	Intergenic	Intergenic	-69203	NM_175312	101148	Mm.354863	NM_175312	ENSMUSG00000042742	Bmt2	AI666701|B630005N14Rik	base methyltransferase of 25S rRNA 2	protein-coding
839	chr12	119163797	119164901	+	2.64	8.48	5.84	5.71e-07	intron (NM_177290, intron 12 of 13)	intron (NM_177290, intron 12 of 13)	73927	NM_177290	320910	Mm.217000	NM_177290	ENSMUSG00000025321	Itgb8	4832412O06Rik	integrin beta 8	protein-coding
840	chr6	91971855	91973874	+	-1.98	7.62	9.61	5.71e-07	Intergenic	Intergenic	-6101	NM_172731	232237	Mm.295740	NM_172731	ENSMUSG00000034037	Fgd5	C330025N11Rik|ZFYVE23|mFLJ00274	FYVE, RhoGEF and PH domain containing 5	protein-coding
841	chr4	41479313	41479968	+	2.86	8.51	5.65	5.81e-07	intron (NM_025539, intron 2 of 2)	intron (NM_025539, intron 2 of 2)	14492	NM_025539	66401	Mm.28574	NM_025539	ENSMUSG00000028443	Nudt2	2310051L06Rik|AA939917|APAH1	nudix (nucleoside diphosphate linked moiety X)-type motif 2	protein-coding
842	chr4	148510685	148511021	+	3.04	7.37	4.33	5.84e-07	intron (NM_020009, intron 28 of 57)	intron (NM_020009, intron 28 of 57)	-10391	NM_001039554	654812	Mm.388929	NM_001039554	ENSMUSG00000028989	Angptl7	-	angiopoietin-like 7	protein-coding
843	chr1	193242212	193242781	+	2.08	8.8	6.72	5.84e-07	promoter-TSS (NM_001044751)	promoter-TSS (NM_001044751)	-136	NM_001044751	15483	Mm.28328	NM_008288	ENSMUSG00000016194	Hsd11b1	-	hydroxysteroid 11-beta dehydrogenase 1	protein-coding
844	chr10	25790151	25790848	+	2.66	7.88	5.22	5.86e-07	intron (NR_045349, intron 2 of 4)	MLT1F1|LTR|ERVL-MaLR	46938	NR_045349	73803	Mm.258921	NR_045349	ENSMUSG00000112444	4930401C15Rik	-	RIKEN cDNA 4930401C15 gene	ncRNA
845	chr11	68022913	68023466	+	2.65	8.12	5.47	5.86e-07	intron (NM_018768, intron 6 of 7)	intron (NM_018768, intron 6 of 7)	56731	NM_001361352	55943	Mm.3973	NM_018768	ENSMUSG00000020903	Stx8	0610007H08Rik|1110002H11Rik|4930571E13Rik|CARB	syntaxin 8	protein-coding
846	chr7	103860955	103861258	+	3.23	7.34	4.11	5.88e-07	Intergenic	Intergenic	-7899	NM_008221	15135	Mm.440164	NM_008221	ENSMUSG00000052187	Hbb-y	Ey|Hby	hemoglobin Y, beta-like embryonic chain	protein-coding
847	chr14	62259075	62259711	+	2.88	7.71	4.82	5.88e-07	Intergenic	Intergenic	33586	NM_173419	239133	Mm.127330	NM_173419	ENSMUSG00000048281	Dleu7	BC038059	deleted in lymphocytic leukemia, 7	protein-coding
848	chr11	32375023	32375583	+	2.55	8.02	5.47	5.88e-07	intron (NM_177364, intron 2 of 12)	intron (NM_177364, intron 2 of 12)	27492	NM_177364	268396	Mm.227616	NM_177364	ENSMUSG00000040711	Sh3pxd2b	G431001E03Rik|TSK4|fad49	SH3 and PX domains 2B	protein-coding
849	chr5	148180570	148181325	+	2.45	8.52	6.07	5.93e-07	intron (NM_001359503, intron 4 of 14)	intron (NM_001359503, intron 4 of 14)	-84270	NM_001359511	77521	Mm.244177	NM_029920	ENSMUSG00000029651	Mtus2	5730592G18Rik|A730013O20Rik|AU067634|C130038G02Rik|Cazip|Gm763|mKIAA0774	microtubule associated tumor suppressor candidate 2	protein-coding
850	chr10	76668731	76669377	+	2.91	7.75	4.84	6.06e-07	Intergenic	Intergenic	-45424	NM_001347207	12834	Mm.1949	NM_146007	ENSMUSG00000020241	Col6a2	Col6a-2	collagen, type VI, alpha 2	protein-coding
851	chr1	133959332	133960069	+	2.16	8.47	6.31	6.1e-07	Intergenic	Intergenic	-38299	NM_054077	116847	Mm.214514	NM_054077	ENSMUSG00000041577	Prelp	7330409J17Rik|SLRR2A	proline arginine-rich end leucine-rich repeat	protein-coding
852	chr17	26791932	26792498	+	2.53	7.78	5.26	6.11e-07	3' UTR (NM_172149, exon 6 of 6)	3' UTR (NM_172149, exon 6 of 6)	11136	NM_172149	224630	Mm.21795	NM_172149	ENSMUSG00000024191	Bnip1	2010005M06Rik|5930429G21Rik|Sec20	BCL2/adenovirus E1B interacting protein 1	protein-coding
853	chr13	60409671	60410393	+	2.73	8.01	5.28	6.16e-07	Intergenic	Intergenic	-191915	NM_001285917	69635	Mm.24103	NM_029653	ENSMUSG00000021559	Dapk1	D13Ucla1|DAP-Kinase	death associated protein kinase 1	protein-coding
854	chr4	105423698	105424332	+	-2.36	5.95	8.31	6.16e-07	Intergenic	Intergenic	266668	NM_080555	67916	Mm.348326	NM_080555	ENSMUSG00000028517	Plpp3	1110003O22Rik|2610002D05Rik|AV025606|D4Bwg0538e|D4Bwg1535e|Lpp3|Ppab2b|Ppap2b	phospholipid phosphatase 3	protein-coding
855	chr4	98142648	98143502	+	1.87	9.54	7.67	6.26e-07	Intergenic	ERVL-E-int|LTR|ERVL	240190	NM_053157	94043	Mm.331719	NM_053157	ENSMUSG00000028563	Tm2d1	2310026L18Rik|AA990549|Bbp	TM2 domain containing 1	protein-coding
856	chr7	98499639	98501043	+	2.01	9.28	7.27	6.29e-07	3' UTR (NM_001113379, exon 2 of 2)	3' UTR (NM_001113379, exon 2 of 2)	6119	NM_001113379	434215	Mm.323057	NM_001113379	ENSMUSG00000090958	Lrrc32	AI426318|D11S833Eh|D7H11S833E|EG434215|Garp	leucine rich repeat containing 32	protein-coding
857	chr17	14720192	14721630	+	2.46	9.1	6.64	6.36e-07	Intergenic	L1MCb|LINE|L1	-26649	NM_011581	21826	Mm.26688	NM_011581	ENSMUSG00000023885	Thbs2	TSP2|Thbs-2	thrombospondin 2	protein-coding
858	chr5	73919736	73920535	+	2.12	8.93	6.82	6.4e-07	Intergenic	Intergenic	148276	NM_177561	69727	Mm.48795	NM_177561	ENSMUSG00000054814	Usp46	1190009E20Rik|2410018I08Rik|AI451644	ubiquitin specific peptidase 46	protein-coding
859	chr7	145024657	145026493	+	-1.94	7.6	9.54	6.41e-07	Intergenic	Intergenic	-85650	NM_007631	12443	Mm.273049	NM_007631	ENSMUSG00000070348	Ccnd1	AI327039|CycD1|Cyl-1|PRAD1|bcl-1|cD1	cyclin D1	protein-coding
860	chr16	49505234	49505546	+	-3.31	3.15	6.46	6.41e-07	Intergenic	Intergenic	-193904	NM_028680	73916	Mm.241276	NM_028680	ENSMUSG00000032965	Ift57	4833420A15Rik|Esrrbl1|Hippi|MHS4R2	intraflagellar transport 57	protein-coding
861	chr19	41160305	41160947	+	2.3	8.59	6.29	6.49e-07	intron (NM_011904, intron 2 of 20)	intron (NM_011904, intron 2 of 20)	46148	NM_011904	24087	Mm.89983	NM_011904	ENSMUSG00000025013	Tll2	-	tolloid-like 2	protein-coding
862	chr10	52389276	52389887	+	-2.61	5.77	8.38	6.62e-07	Intergenic	Intergenic	-2027	NM_025684	66650	Mm.90950	NM_025684	ENSMUSG00000038624	Nepn	5730521E12Rik|Npn|periolin	nephrocan	protein-coding
863	chr14	102859307	102859949	+	3.16	7.58	4.42	6.63e-07	Intergenic	Intergenic	123004	NR_039592	100628599		NR_039592	ENSMUSG00000092901	Mir5130	mir-5130|mmu-mir-5130|mu-mir-5130	microRNA 5130	ncRNA
864	chr10	97409043	97409565	+	2.87	8.34	5.47	6.8e-07	Intergenic	Intergenic	-14174	NR_039547	100628616		NR_039547	ENSMUSG00000105557	Mir3966	mmu-mir-3966|mu-mir-3966	microRNA 3966	ncRNA
865	chr15	62287021	62287711	+	2.33	8.21	5.88	6.8e-07	Intergenic	Intergenic	-67915	NR_003523	67552	Mm.484027	NM_026230		H2afy3	4933432H23Rik	H2A histone family, member Y3	pseudo
866	chr11	68030572	68031215	+	2.34	8.96	6.62	6.88e-07	intron (NM_018768, intron 6 of 7)	HAL1ME|LINE|L1	64435	NM_001361352	55943	Mm.3973	NM_018768	ENSMUSG00000020903	Stx8	0610007H08Rik|1110002H11Rik|4930571E13Rik|CARB	syntaxin 8	protein-coding
867	chr9	20794091	20794699	+	2.23	8.38	6.15	6.89e-07	intron (NM_016919, intron 27 of 66)	intron (NM_016919, intron 27 of 66)	20672	NM_001317388	53867	Mm.334994	NM_016919	ENSMUSG00000004098	Col5a3	-	collagen, type V, alpha 3	protein-coding
868	chr11	16798119	16798477	+	3.29	7.38	4.09	6.9e-07	intron (NM_207655, intron 1 of 27)	intron (NM_207655, intron 1 of 27)	46095	NM_007912	13649	Mm.8534	NM_007912	ENSMUSG00000020122	Egfr	9030024J15Rik|AI552599|Erbb|Errb1|Errp|Wa5|wa-2|wa2	epidermal growth factor receptor	protein-coding
869	chr1	45663949	45664437	+	3.21	7.1	3.89	6.9e-07	Intergenic	Intergenic	-130973	NM_028599	73674	Mm.270376	NM_028599	ENSMUSG00000025995	Wdr75	1300003A18Rik|2410118I19Rik|C77608	WD repeat domain 75	protein-coding
870	chr15	7352552	7353188	+	3.01	8.42	5.41	6.9e-07	intron (NM_001289496, intron 1 of 22)	intron (NM_001289496, intron 1 of 22)	45520	NM_001289496	268780	Mm.203208	NM_178748	ENSMUSG00000042961	Egflam	5930412K08|AU040377	EGF-like, fibronectin type III and laminin G domains	protein-coding
871	chr4	97693864	97694416	+	2.88	7.99	5.11	6.9e-07	intron (NM_001122952, intron 1 of 10)	intron (NM_001122952, intron 1 of 10)	-83486	NM_010905	18027	Mm.31274	NM_010905	ENSMUSG00000028565	Nfia	1110047K16Rik|9430022M17Rik|CTF|NF1-A|NF1A	nuclear factor I/A	protein-coding
872	chr10	4775252	4775991	+	3.09	7.94	4.85	6.93e-07	intron (NM_001302531, intron 3 of 8)	intron (NM_001302531, intron 3 of 8)	65463	NM_001302531	13982	Mm.9213	NM_007956	ENSMUSG00000019768	Esr1	ER|ER-alpha|ERa|ERalpha|ESR|Estr|Estra|Nr3a1	estrogen receptor 1 (alpha)	protein-coding
873	chr3	109936285	109936633	+	3.08	7.16	4.08	6.96e-07	intron (NM_001163348, intron 2 of 6)	intron (NM_001163348, intron 2 of 6)	207013	NM_001163348	80883	Mm.39262	NM_030699	ENSMUSG00000059857	Ntng1	A930010C08Rik|AI853992|Lmnt1	netrin G1	protein-coding
874	chr18	63548810	63549375	+	2.88	7.76	4.87	6.96e-07	Intergenic	Intergenic	143267	NM_016792	53382	Mm.19169	NM_016792	ENSMUSG00000024583	Txnl1	32kDa|TRP32|Txnl	thioredoxin-like 1	protein-coding
875	chr2	72674201	72675355	+	2.6	8.42	5.82	7e-07	Intergenic	Intergenic	-28732	NR_040503	74541	Mm.410774	NR_040503	ENSMUSG00000085252	8430437L04Rik	-	RIKEN cDNA 8430437L04 gene	ncRNA
876	chr7	111158712	111159394	+	2.65	7.74	5.09	7.01e-07	Intergenic	MTEa|LTR|ERVL-MaLR	-36378	NR_015573	75479	Mm.381620	NR_015573	ENSMUSG00000110424	1700012D14Rik	-	RIKEN cDNA 1700012D14 gene	ncRNA
877	chr9	69043951	69045048	+	2.45	8.35	5.9	7.01e-07	intron (NM_013646, intron 1 of 10)	intron (NM_013646, intron 1 of 10)	-245342	NM_001289916	19883	Mm.378450	NM_013646	ENSMUSG00000032238	Rora	9530021D13Rik|Nr1f1|ROR1|ROR2|ROR3|nmf267|sg|staggerer|tmgc26	RAR-related orphan receptor alpha	protein-coding
878	chr4	138503591	138504374	+	2.81	8.43	5.62	7.08e-07	Intergenic	Intergenic	48834	NM_025451	66259	Mm.41603	NM_025451	ENSMUSG00000046447	Camk2n1	1810006K23Rik|AI848599|AI891706	calcium/calmodulin-dependent protein kinase II inhibitor 1	protein-coding
879	chr18	38718572	38719144	+	2.78	7.39	4.61	7.12e-07	Intergenic	Intergenic	-117590	NM_011898	24066	Mm.42038	NM_011898	ENSMUSG00000024427	Spry4	A030006O18Rik|sprouty4	sprouty RTK signaling antagonist 4	protein-coding
880	chr10	97589553	97590031	+	2.75	7.45	4.69	7.17e-07	Intergenic	Intergenic	7139	NR_045356	75025	Mm.159401	NR_045356	ENSMUSG00000112484	4930473O22Rik	-	RIKEN cDNA 4930473O22 gene	ncRNA
881	chr11	110130786	110131062	+	3.51	7.35	3.83	7.22e-07	intron (NM_147220, intron 23 of 38)	intron (NM_147220, intron 23 of 38)	-34987	NM_153145	217258	Mm.344148	NM_153145	ENSMUSG00000041828	Abca8a	-	ATP-binding cassette, sub-family A (ABC1), member 8a	protein-coding
882	chr9	23436797	23437147	+	3.33	7.05	3.71	7.22e-07	intron (NM_028472, intron 13 of 14)	intron (NM_028472, intron 13 of 14)	213896	NM_028472	73230	Mm.335020	NM_028472	ENSMUSG00000031963	Bmper	3110056H04Rik|CV-2|Crim3|Cv2	BMP-binding endothelial regulator	protein-coding
883	chr6	32199652	32200054	+	3	7.51	4.52	7.22e-07	intron (NM_175750, intron 16 of 31)	MER58A|DNA|hAT-Charlie	149565	NM_029587	76382	Mm.23510	NM_029587	ENSMUSG00000029766	1700012A03Rik	AI429084	RIKEN cDNA 1700012A03 gene	protein-coding
884	chr9	14147191	14148252	+	2.14	8.92	6.78	7.22e-07	Intergenic	Intergenic	-128580	NM_030261	75747	Mm.325126	NM_030261	ENSMUSG00000032009	Sesn3	5630400E15Rik|BC003348|SEST3	sestrin 3	protein-coding
885	chr1	185650869	185651311	+	3.12	7.45	4.34	7.29e-07	intron (NR_030555, intron 4 of 6)	MLT1H|LTR|ERVL-MaLR	113754	NR_030555	100124483		NR_030555	ENSMUSG00000076976	Mir297c	Mirn297c	microRNA 297c	ncRNA
886	chr4	93551107	93551608	+	2.7	8.12	5.42	7.29e-07	Intergenic	Intergenic	-215846	NM_026954	69136	Mm.171558	NM_026954	ENSMUSG00000054000	Tusc1	2200001D17Rik|TSG-9	tumor suppressor candidate 1	protein-coding
887	chr12	10473941	10474410	+	2.69	7.56	4.87	7.29e-07	intron (NR_110487, intron 6 of 11)	intron (NR_110487, intron 6 of 11)	27787	NR_110487	328061	Mm.56067	NR_110487	ENSMUSG00000112792	Gm38407	4931412M21	predicted gene, 38407	ncRNA
888	chr11	79802568	79803562	+	2.68	8.28	5.6	7.29e-07	Intergenic	Intergenic	76665	NR_029959	723853		NR_029959	ENSMUSG00000065489	Mir365-2	Mirn365-2|mir-365-2	microRNA 365-2	ncRNA
889	chr2	173377641	173378274	+	2.67	8.4	5.72	7.3e-07	Intergenic	Intergenic	-101424	NM_022995	65112	Mm.73682	NM_022995	ENSMUSG00000038400	Pmepa1	2210418I02Rik|AW455466|Erg1.2|N4wbp4|Stag1|Tmepai	prostate transmembrane protein, androgen induced 1	protein-coding
890	chr15	9864891	9865194	+	3.14	7.51	4.37	7.35e-07	Intergenic	MLT2B2|LTR|ERVL	-116174	NM_001305044	320277	Mm.127822	NM_177123	ENSMUSG00000072663	Spef2	C230086A09Rik	sperm flagellar 2	protein-coding
891	chr9	32017830	32018465	+	2.38	8.44	6.07	7.49e-07	Intergenic	Intergenic	-97989	NM_001195632	330914	Mm.46683	NM_177379	ENSMUSG00000041444	Arhgap32	3426406O18Rik|Gc-gap|Grit|Px-rics|Rics|mKIAA0712|p200Rhogap|p250Gap	Rho GTPase activating protein 32	protein-coding
892	chr9	22765599	22766089	+	3.08	6.94	3.86	7.58e-07	intron (NM_001360259, intron 19 of 22)	intron (NM_001360259, intron 19 of 22)	290129	NM_001360259	319845	Mm.176725	NM_178415	ENSMUSG00000035919	Bbs9	E130103I17Rik	Bardet-Biedl syndrome 9 (human)	protein-coding
893	chr1	152417398	152418026	+	2.85	8.56	5.71	7.58e-07	intron (NM_177756, intron 1 of 11)	intron (NM_177756, intron 1 of 11)	17845	NM_177756	269132	Mm.23782	NM_177756	ENSMUSG00000032649	Colgalt2	AI427652|D730024P12|Glt25d2	collagen beta(1-O)galactosyltransferase 2	protein-coding
894	chr14	106365674	106366052	+	3.29	7.35	4.06	7.61e-07	Intergenic	Intergenic	120657	NR_045938	73631	Mm.48862	NR_045938	ENSMUSG00000099794	1700128A07Rik	-	RIKEN cDNA 1700128A07 gene	ncRNA
895	chr10	21545413	21545902	+	-2.29	5.74	8.03	7.67e-07	Intergenic	Intergenic	-47488	NR_027968	67692	Mm.54306	NM_183266	ENSMUSG00000050844	1700020N01Rik	-	RIKEN cDNA 1700020N01 gene	ncRNA
896	chr13	47335842	47336407	+	2.96	7.62	4.66	7.76e-07	Intergenic	Intergenic	142121	NM_001170643	218215	Mm.287609	NM_146042	ENSMUSG00000038068	Rnf144b	BC025007|E130105P19Rik|Ibrdc2|Pir2	ring finger protein 144B	protein-coding
897	chr2	173168269	173168895	+	2.78	7.88	5.1	7.79e-07	Intergenic	Intergenic	15509	NM_011044	18534	Mm.266867	NM_011044	ENSMUSG00000027513	Pck1	AI265463|PEPCK|PEPCK-C|Pck-1	phosphoenolpyruvate carboxykinase 1, cytosolic	protein-coding
898	chr15	86093130	86093779	+	2.41	8.73	6.32	7.81e-07	intron (NM_172611, intron 2 of 18)	RMER6A|LTR|ERVK	34727	NM_001205353	223752	Mm.24442	NM_172611	ENSMUSG00000035900	Gramd4	9930016O13	GRAM domain containing 4	protein-coding
899	chr9	65261533	65262250	+	2.56	7.57	5.01	7.84e-07	Intergenic	Intergenic	-3289	NM_173385	214425	Mm.138455	NM_173385	ENSMUSG00000042254	Cilp	9830114D16|C130036G17Rik	cartilage intermediate layer protein, nucleotide pyrophosphohydrolase	protein-coding
900	chr10	38121945	38122276	+	2.72	7.84	5.12	8.03e-07	Intergenic	Intergenic	-53664	NR_131035	75877	Mm.402094	NR_131035	ENSMUSG00000111234	4930591E09Rik	-	RIKEN cDNA 4930591E09 gene	ncRNA
901	chr1	76724459	76724988	+	3.15	7.41	4.25	8.06e-07	Intergenic	Intergenic	215163	NR_105761	102465175		NR_105761	ENSMUSG00000098611	Mir6343	Gm27304|mmu-mir-6343	microRNA 6343	ncRNA
902	chr19	14180179	14180604	+	2.95	7.49	4.53	8.06e-07	Intergenic	Intergenic	255559	NR_152176	667433	Mm.128913	NR_152176		Gm8630	EG667433	predicted gene 8630	ncRNA
903	chr14	51195721	51196136	+	-2.34	5.56	7.91	8.1e-07	promoter-TSS (NM_007449)	promoter-TSS (NM_007449)	-5	NM_007449	11731	Mm.377077	NM_007449	ENSMUSG00000047894	Ang2	Angrp|Raa3|Rnase5b	angiogenin, ribonuclease A family, member 2	protein-coding
904	chr8	24190378	24191356	+	2.61	8.53	5.92	8.16e-07	Intergenic	Intergenic	248079	NM_026931	69068	Mm.25775	NM_026931	ENSMUSG00000056313	Tcim	1110065B09Rik|1810011O10Rik|AW121743|AW321058	transcriptional and immune response regulator	protein-coding
905	chr11	50646138	50646537	+	3.02	7.72	4.7	8.22e-07	intron (NM_175643, intron 2 of 21)	intron (NM_175643, intron 2 of 21)	44252	NM_175643	216725	Mm.110597	NM_175643	ENSMUSG00000036545	Adamts2	ADAM-TS 2|ADAM-TS2|ADAMTS-2|PC I-NP|PCINP|pNPI	a disintegrin-like and metallopeptidase (reprolysin type) with thrombospondin type 1 motif, 2	protein-coding
906	chr5	102576728	102577058	+	3.08	7.61	4.54	8.28e-07	intron (NM_029270, intron 2 of 9)	intron (NM_029270, intron 2 of 9)	95502	NM_146161	231532	Mm.440191	NM_029270	ENSMUSG00000057315	Arhgap24	0610025G21Rik	Rho GTPase activating protein 24	protein-coding
907	chr3	154540338	154540903	+	2.6	7.57	4.97	8.28e-07	Intergenic	Intergenic	-56091	NM_009968	12972	Mm.374855	NM_009968	ENSMUSG00000028199	Cryz	Sez9	crystallin, zeta	protein-coding
908	chr9	109849230	109849853	+	2.62	8.47	5.85	8.3e-07	promoter-TSS (NM_009921)	promoter-TSS (NM_009921)	-85	NM_009921	12796	Mm.3834	NM_009921	ENSMUSG00000038357	Camp	CAP18|Cnlp|Cramp|FALL39|MCLP	cathelicidin antimicrobial peptide	protein-coding
909	chr1	168234364	168234769	+	2.87	7.3	4.43	8.33e-07	intron (NM_183355, intron 2 of 8)	intron (NM_183355, intron 2 of 8)	197603	NM_183355	18514	Mm.43358	NM_008783	ENSMUSG00000052534	Pbx1	2310056B04Rik|D230003C07Rik|Pbx-1	pre B cell leukemia homeobox 1	protein-coding
910	chr1	174044423	174044775	+	2.82	7.37	4.55	8.47e-07	Intergenic	Intergenic	2666	NM_146717	258712	Mm.223146	NM_146717	ENSMUSG00000045381	Olfr433	MOR123-1	olfactory receptor 433	protein-coding
911	chr1	165075257	165076258	+	2.74	8.49	5.75	8.47e-07	intron (NR_040480, intron 1 of 4)	intron (NR_040480, intron 1 of 4)	16173	NR_040480	75857	Mm.109021	NR_040480	ENSMUSG00000102408	4930568G15Rik	-	RIKEN cDNA 4930568G15 gene	ncRNA
912	chr2	110392550	110393429	+	2.44	8.72	6.28	8.47e-07	Intergenic	Intergenic	-29996	NM_026271	67606	Mm.291809	NM_026271	ENSMUSG00000074971	Fibin	1110018M03Rik	fin bud initiation factor homolog (zebrafish)	protein-coding
913	chr14	106393725	106394359	+	2.85	7.98	5.13	8.65e-07	Intergenic	Intergenic	92478	NR_045938	73631	Mm.48862	NR_045938	ENSMUSG00000099794	1700128A07Rik	-	RIKEN cDNA 1700128A07 gene	ncRNA
914	chr10	86211998	86212433	+	3.34	7.32	3.98	8.68e-07	intron (NM_013722, intron 6 of 13)	intron (NM_013722, intron 6 of 13)	-88197	NM_011595	21859	Mm.4871	NM_011595	ENSMUSG00000020044	Timp3	Timp-3	tissue inhibitor of metalloproteinase 3	protein-coding
915	chr13	107074944	107075181	+	3.58	6.69	3.11	8.73e-07	Intergenic	Intergenic	52492	NR_015471	100040322	Mm.133867	NR_015471	ENSMUSG00000071181	3830408C21Rik	-	RIKEN cDNA 3830408C21 gene	ncRNA
916	chr5	90841309	90841883	+	2.97	8.14	5.17	8.73e-07	Intergenic	Intergenic	47062	NM_011339	20309	Mm.64326	NM_011339	ENSMUSG00000029375	Cxcl15	Il8|Scyb15|lungkine|weche	chemokine (C-X-C motif) ligand 15	protein-coding
917	chr2	173338577	173339481	+	2.42	8.77	6.35	8.73e-07	Intergenic	Intergenic	-62496	NM_022995	65112	Mm.73682	NM_022995	ENSMUSG00000038400	Pmepa1	2210418I02Rik|AW455466|Erg1.2|N4wbp4|Stag1|Tmepai	prostate transmembrane protein, androgen induced 1	protein-coding
918	chr11	31464898	31465170	+	3.11	7.1	3.99	8.77e-07	Intergenic	LTR50|LTR|ERVL	-94973	NM_011491	20856	Mm.32506	NM_011491	ENSMUSG00000020303	Stc2	AW125853|Stc-2|Stc2l|mustc2	stanniocalcin 2	protein-coding
919	chr11	11878319	11879838	+	2.22	8.89	6.67	8.81e-07	intron (NM_016672, intron 2 of 14)	intron (NM_016672, intron 2 of 14)	10955	NR_045178	73321	Mm.443306	NR_045178	ENSMUSG00000086391	1700042O10Rik	-	RIKEN cDNA 1700042O10 gene	ncRNA
920	chr19	56198478	56198924	+	3.07	7.75	4.68	8.82e-07	Intergenic	Intergenic	-89211	NM_001329936	226243	Mm.25791	NM_146101	ENSMUSG00000025075	Habp2	AI035669|FSAP|HABP|HGFAL|PHBP	hyaluronic acid binding protein 2	protein-coding
921	chr6	53218699	53219258	+	2.53	8	5.48	8.82e-07	Intergenic	Intergenic	-2186	NR_073371	231989	Mm.372520	NR_073371	ENSMUSG00000107935	Gm4872	D430007I03	predicted gene 4872	ncRNA
922	chr9	35362219	35362710	+	2.46	8.13	5.67	8.82e-07	Intergenic	MIRb|SINE|MIR	81359	NR_040715	71133	Mm.158577	NR_040715	ENSMUSG00000111746	4933422A05Rik	-	RIKEN cDNA 4933422A05 gene	ncRNA
923	chr15	12318386	12318780	+	2.7	7.85	5.15	8.83e-07	Intergenic	RMER1B|Other|Other	-2913	NM_025673	66629	Mm.157655	NM_025673	ENSMUSG00000022200	Golph3	4733401N08Rik|5730410D03Rik|AW413496	golgi phosphoprotein 3	protein-coding
924	chr7	73183818	73184172	+	3.16	7.11	3.94	8.9e-07	Intergenic	Intergenic	-81927	NR_046024	625243	Mm.261798	NR_046024	ENSMUSG00000108383	Gm6567	-	predicted gene 6567	ncRNA
925	chr11	83582845	83583918	+	2.25	8.25	6	8.9e-07	intron (NR_036453, intron 1 of 8)	intron (NR_036453, intron 1 of 8)	1320	NR_036453	100504464	Mm.341706	NR_036452	ENSMUSG00000051832	E230016K23Rik	-	RIKEN cDNA E230016K23 gene	ncRNA
926	chr12	119082787	119083331	+	3.2	7.46	4.26	8.99e-07	Intergenic	Intergenic	-116638	NM_029961	77706	Mm.261496	NM_029961	ENSMUSG00000072791	Abcb5	9230106F14Rik	ATP-binding cassette, sub-family B (MDR/TAP), member 5	protein-coding
927	chr11	104599499	104599893	+	2.93	7.02	4.1	8.99e-07	Intergenic	Intergenic	-8304	NM_016780	16416	Mm.87150	NM_016780	ENSMUSG00000020689	Itgb3	CD61|GP3A|INGRB3	integrin beta 3	protein-coding
928	chr7	118441433	118441964	+	2.77	8.19	5.42	8.99e-07	intron (NM_001362179, intron 3 of 7)	intron (NM_001362179, intron 3 of 7)	1862	NM_001362180	110058	Mm.156558	NM_138649	ENSMUSG00000058420	Syt17	Bk|sytXVII	synaptotagmin XVII	protein-coding
929	chr10	93749087	93750029	+	2.56	8.19	5.63	8.99e-07	Intergenic	Intergenic	-66236	NR_038017	100504069	Mm.391412	NR_038017	ENSMUSG00000085723	Gm15915	-	predicted gene 15915	ncRNA
930	chr2	30487606	30487969	+	2.91	7.66	4.75	9.07e-07	Intergenic	Intergenic	-13588	NM_030244	72500	Mm.295464	NM_030244	ENSMUSG00000089762	Ier5l	2610524G09Rik	immediate early response 5-like	protein-coding
931	chr4	95456413	95456750	+	3.94	6.74	2.8	9.2e-07	Intergenic	Intergenic	-100926	NM_001113412	75578	Mm.276098	NM_029347	ENSMUSG00000028573	Fggy	2310009E04Rik	FGGY carbohydrate kinase domain containing	protein-coding
932	chr1	183671599	183671919	+	3.37	6.89	3.52	9.22e-07	Intergenic	Intergenic	-77218	NR_151520	102637191	Mm.417076	NR_151520	ENSMUSG00000103305	Gm34068	-	predicted gene, 34068	ncRNA
933	chr4	58575823	58576480	+	2.59	7.87	5.28	9.22e-07	Intergenic	MLT1A1|LTR|ERVL-MaLR	-22660	NM_010336	14745	Mm.4772	NM_010336	ENSMUSG00000038668	Lpar1	AI326300|Edg2|Gpcr26|Kdt2|lpA1|vzg-1	lysophosphatidic acid receptor 1	protein-coding
934	chr14	105993226	105993819	+	3	7.01	4.01	9.26e-07	Intergenic	Intergenic	-96703	NM_011897	24064	Mm.89982	NM_011897	ENSMUSG00000022114	Spry2	sprouty2	sprouty RTK signaling antagonist 2	protein-coding
935	chr3	68692691	68694245	+	2.33	9.27	6.94	9.36e-07	intron (NM_008351, intron 2 of 6)	intron (NM_008351, intron 2 of 6)	2044	NM_008351	16159	Mm.103783	NM_008351	ENSMUSG00000027776	Il12a	IL-12p35|Il-12a|Ll12a|p35	interleukin 12a	protein-coding
936	chr10	108896596	108897108	+	3.01	7.48	4.47	9.38e-07	intron (NM_001358501, intron 2 of 10)	intron (NM_001358501, intron 2 of 10)	112259	NM_001358503	20979	Mm.289702	NM_009306	ENSMUSG00000035864	Syt1	AW124717|G630098F17Rik|SytI	synaptotagmin I	protein-coding
937	chr7	72504181	72504679	+	2.78	7.79	5.01	9.38e-07	Intergenic	Intergenic	-197835	NM_001024703	244049	Mm.217412	NM_001024703	ENSMUSG00000032776	Mctp2	Gm489	multiple C2 domains, transmembrane 2	protein-coding
938	chr15	71958817	71959041	+	4.04	6.54	2.5	9.49e-07	intron (NM_027174, intron 12 of 63)	MIRb|SINE|MIR	75298	NM_027174	69700	Mm.322500	NM_027174	ENSMUSG00000079022	Col22a1	2310067L16Rik|C80743	collagen, type XXII, alpha 1	protein-coding
939	chr8	25342618	25343698	+	2.18	8.39	6.22	9.5e-07	Intergenic	Intergenic	-36888	NR_040352	74489	Mm.256468	NR_040352	ENSMUSG00000110140	5430421F17Rik	-	RIKEN cDNA 5430421F17 gene	ncRNA
940	chr3	21379594	21380356	+	2.51	7.65	5.14	9.59e-07	Intergenic	Intergenic	-696677	NM_030732	81004	Mm.202966	NM_030732	ENSMUSG00000027630	Tbl1xr1	8030499H02Rik|A630076E03Rik|AW539987|C21|C230089I12Rik|DC42|Ira1|TBLR1	transducin (beta)-like 1X-linked receptor 1	protein-coding
941	chr1	133448238	133449007	+	-2.44	6.28	8.71	9.61e-07	Intergenic	Intergenic	-24410	NM_011439	20668	Mm.8575	NM_011439	ENSMUSG00000070643	Sox13	AA407916|AW259412|AW540933|Sox-13	SRY (sex determining region Y)-box 13	protein-coding
942	chr5	143056477	143056879	+	2.81	8.04	5.23	9.67e-07	intron (NM_001359851, intron 12 of 15)	intron (NM_001359851, intron 12 of 15)	56342	NM_207110	108086	Mm.381440	NM_080561	ENSMUSG00000045078	Rnf216	2810055G22Rik|AI647468|AU019462|C86502|F830018F18Rik|TRIAD3|UIP83|Ubce7ip1	ring finger protein 216	protein-coding
943	chr11	16794956	16795421	+	2.38	8.21	5.83	9.68e-07	intron (NM_207655, intron 1 of 27)	intron (NM_207655, intron 1 of 27)	42985	NM_007912	13649	Mm.8534	NM_007912	ENSMUSG00000020122	Egfr	9030024J15Rik|AI552599|Erbb|Errb1|Errp|Wa5|wa-2|wa2	epidermal growth factor receptor	protein-coding
944	chr12	47164066	47164715	+	2.25	8.22	5.97	9.69e-07	Intergenic	Intergenic	-345615	NM_021361	664883	Mm.247195	NM_021361	ENSMUSG00000021047	Nova1	9430099M15Rik|G630039L02|Nova-1	neuro-oncological ventral antigen 1	protein-coding
945	chr1	186136521	186137328	+	2.62	8.25	5.63	9.8e-07	Intergenic	Intergenic	-19614	NM_146106	226791	Mm.257116	NM_146106	ENSMUSG00000039246	Lyplal1	BC027340|Q96AVO	lysophospholipase-like 1	protein-coding
946	chr15	32042233	32043068	+	2.6	8.34	5.74	9.8e-07	Intergenic	Intergenic	-134639	NM_020503	57254	Mm.377133	NM_020503	ENSMUSG00000045267	Tas2r119	T2r19|Tas2r19|mGR19|mt2r19	taste receptor, type 2, member 119	protein-coding
947	chr11	28951632	28952293	+	2.46	8.02	5.56	9.87e-07	Intergenic	LTR16A|LTR|ERVL	98757	NM_146015	216616	Mm.44176	NM_146015	ENSMUSG00000020467	Efemp1	-	epidermal growth factor-containing fibulin-like extracellular matrix protein 1	protein-coding
948	chr2	125448900	125449386	+	2.76	8.02	5.26	9.89e-07	intron (NM_007993, intron 6 of 65)	intron (NM_007993, intron 6 of 65)	57295	NM_007993	14118	Mm.271644	NM_007993	ENSMUSG00000027204	Fbn1	AI536462|B430209H23|Fib-1|Tsk	fibrillin 1	protein-coding
949	chr6	29508901	29509675	+	2.67	8.23	5.56	9.89e-07	Intergenic	Intergenic	-1336	NM_001029985	333088	Mm.332961	NM_001029985	ENSMUSG00000059022	Kcp	AW060220|CRIM-2|Crim2|Gm793|KCP-1	kielin/chordin-like protein	protein-coding
950	chr2	79542223	79542984	+	2.78	7.72	4.95	9.98e-07	Intergenic	Intergenic	-85967	NM_010894	18012	Mm.4636	NM_010894	ENSMUSG00000034701	Neurod1	BETA2|BHF-1|Nd1|Neurod|bHLHa3	neurogenic differentiation 1	protein-coding
951	chr9	20986952	20987720	+	3.12	8.54	5.42	1.01e-06	Intergenic	L1Md_F2|LINE|L1	-10543	NM_010333	14739	Mm.46493	NM_010333	ENSMUSG00000043895	S1pr2	1100001A16Rik|Edg5|Gpcr13|H218|LPb2|S1P2	sphingosine-1-phosphate receptor 2	protein-coding
952	chr9	116278899	116279251	+	3.06	6.88	3.82	1.01e-06	Intergenic	Intergenic	89895	NR_152204	100043817	Mm.404276	NR_152204		Gm4668	-	predicted gene 4668	ncRNA
953	chr9	98691092	98691703	+	2.91	8.01	5.1	1.01e-06	Intergenic	Intergenic	-89718	NM_025485	64655	Mm.17949	NM_025485	ENSMUSG00000032459	Mrps22	3100002P07Rik|Rpms22	mitochondrial ribosomal protein S22	protein-coding
954	chr6	112287650	112288054	+	-2.57	5.23	7.8	1.02e-06	non-coding (NR_045986, exon 2 of 3)	non-coding (NR_045986, exon 2 of 3)	2467	NR_045986	100503613	Mm.136719	NM_177012		5031434C07Rik	-	RIKEN cDNA 5031434C07 gene	ncRNA
955	chr7	27315769	27316357	+	2.58	8.15	5.57	1.04e-06	intron (NM_001113549, intron 21 of 29)	intron (NM_001113549, intron 21 of 29)	17585	NM_001113549	108075	Mm.272251	NM_175641	ENSMUSG00000040488	Ltbp4	2310046A13Rik	latent transforming growth factor beta binding protein 4	protein-coding
956	chr1	89545061	89545680	+	2.79	7.61	4.82	1.07e-06	intron (NM_001037136, intron 1 of 16)	intron (NM_001037136, intron 1 of 16)	90559	NM_001037136	347722	Mm.291135	NM_178119	ENSMUSG00000055013	Agap1	Centg2|Ggap1|R75364|mKIAA1099	ArfGAP with GTPase domain, ankyrin repeat and PH domain 1	protein-coding
957	chr7	71311341	71312057	+	-2.57	6.43	9	1.07e-06	Intergenic	Intergenic	-597996	NR_130995	78156	Mm.243818	NR_130995	ENSMUSG00000108669	4930441H08Rik	-	RIKEN cDNA 4930441H08 gene	ncRNA
958	chr16	58303532	58303958	+	2.84	7.69	4.85	1.1e-06	Intergenic	Intergenic	-104790	NM_028523	73379	Mm.373589	NM_028523	ENSMUSG00000035107	Dcbld2	1700055P21Rik|AW146002|CLCP1|Esdn	discoidin, CUB and LCCL domain containing 2	protein-coding
959	chr13	99071444	99072189	+	2.52	8.07	5.55	1.12e-06	Intergenic	Intergenic	16105	NR_045495	69603	Mm.390632	NR_045495	ENSMUSG00000100410	2310020H05Rik	-	RIKEN cDNA 2310020H05 gene	ncRNA
960	chr15	84639157	84640348	+	1.87	9.42	7.55	1.12e-06	Intergenic	Intergenic	-23454	NM_001346662	109270	Mm.291372	NM_146061	ENSMUSG00000036106	Prr5	AU043908|Arhgap8|C030017C09Rik|C78947|Protor-1|Protor1	proline rich 5 (renal)	protein-coding
961	chr7	116715052	116715930	+	-1.87	6.84	8.71	1.12e-06	Intergenic	Intergenic	211122	NM_001360375	53322	Mm.9901	NM_016773	ENSMUSG00000030659	Nucb2	AI607786|Calnuc|Nefa|Nesfatin-1	nucleobindin 2	protein-coding
962	chr2	21167936	21168450	+	2.77	7.72	4.94	1.13e-06	Intergenic	Intergenic	37172	NM_027728	71233	Mm.27658	NM_027728	ENSMUSG00000026679	Enkur	4933434I06Rik|AU016229	enkurin, TRPC channel interacting protein	protein-coding
963	chr8	119651285	119651684	+	3.17	7.06	3.89	1.14e-06	Intergenic	Intergenic	-14881	NM_023395	67866	Mm.87599	NM_023395	ENSMUSG00000023336	Wfdc1	2310058A03Rik|ps20	WAP four-disulfide core domain 1	protein-coding
964	chr15	31186674	31188154	+	2.29	8.78	6.49	1.14e-06	Intergenic	Intergenic	-36971	NM_146057	223453	Mm.222867	NM_146057	ENSMUSG00000039168	Dap	4921531N22Rik|AI789753|AU040360	death-associated protein	protein-coding
965	chr15	101126757	101127841	+	2.2	9.19	7	1.14e-06	Intergenic	Intergenic	-1223	NM_001277258	11482	Mm.279542	NM_009612	ENSMUSG00000000530	Acvrl1	AI115505|AI427544|Acvrlk1|Alk1	activin A receptor, type II-like 1	protein-coding
966	chr8	26356830	26357191	+	3.73	6.96	3.23	1.15e-06	Intergenic	Intergenic	198841	NM_199042	73754	Mm.383241	NM_199042	ENSMUSG00000037214	Thap1	4833431A01Rik|AW490810	THAP domain containing, apoptosis associated protein 1	protein-coding
967	chr6	94620609	94621624	+	1.8	9.28	7.48	1.15e-06	intron (NM_001355269, intron 8 of 17)	intron (NM_001355269, intron 8 of 17)	-14701	NR_106008	102466992		NR_106008	ENSMUSG00000098531	Mir7041	Gm27872|mmu-mir-7041	microRNA 7041	ncRNA
968	chr2	128470381	128470852	+	2.27	8.66	6.39	1.16e-06	Intergenic	Intergenic	-41265	NR_028590	100043424	Mm.297222	NR_028589		Gm14005	-	predicted gene 14005	ncRNA
969	chr12	104640999	104641376	+	3	7.37	4.37	1.18e-06	Intergenic	Intergenic	110765	NM_148948	192119	Mm.21135	NM_148948	ENSMUSG00000041415	Dicer1	1110006F08Rik|D12Ertd7e|mKIAA0928	dicer 1, ribonuclease type III	protein-coding
970	chr4	4304728	4305137	+	2.78	7.47	4.69	1.18e-06	Intergenic	Intergenic	-166117	NM_001348209	18619	Mm.475097	NM_001002927	ENSMUSG00000045573	Penk	AI326464|ENK|PPA|Penk1	preproenkephalin	protein-coding
971	chr18	64717174	64718115	+	2.75	8.38	5.63	1.18e-06	Intergenic	Intergenic	-56644	NM_001001488	54670	Mm.270043	NM_001001488	ENSMUSG00000039529	Atp8b1	AI451886|FIC1|Ic	ATPase, class I, type 8B, member 1	protein-coding
972	chr3	87855783	87856421	+	2.67	7.77	5.1	1.18e-06	TTS (NM_021309)	TTS (NM_021309)	9347	NM_021309	27371	Mm.86361	NM_021309	ENSMUSG00000028071	Sh2d2a	Lad|Ribp|Tsad	SH2 domain containing 2A	protein-coding
973	chr2	104581371	104581890	+	2.61	7.41	4.8	1.18e-06	Intergenic	Intergenic	-8854	NM_001037326	228410	Mm.259876	NM_145529	ENSMUSG00000027176	Cstf3	4732468G05Rik|C79532|CstF-77	cleavage stimulation factor, 3' pre-RNA, subunit 3	protein-coding
974	chr6	93445259	93446016	+	1.88	8.88	7	1.18e-06	Intergenic	Intergenic	467326	NR_104594	14924	Mm.217216	NM_010367	ENSMUSG00000045095	Magi1	AIP3|BAP1|Baiap1|Gukmi1|MAGI1c|Magi-1|TNRC19|WWP3|mKIAA4129	membrane associated guanylate kinase, WW and PDZ domain containing 1	protein-coding
975	chr9	35044998	35046604	+	1.86	10.12	8.26	1.18e-06	TTS (NM_009178)	TTS (NM_009178)	-70927	NR_029475	78934	Mm.391688	NR_029475	ENSMUSG00000070315	4930581F22Rik	-	RIKEN cDNA 4930581F22 gene	ncRNA
976	chr4	8113336	8114012	+	-2.32	6.18	8.5	1.18e-06	Intergenic	Intergenic	125367	NM_007592	12319	Mm.119320	NM_007592	ENSMUSG00000041261	Car8	AW546993|Ca8|Cals|Cals1|Carp|wdl	carbonic anhydrase 8	protein-coding
977	chr12	10513447	10514081	+	2.79	7.36	4.58	1.19e-06	intron (NR_110487, intron 10 of 11)	intron (NR_110487, intron 10 of 11)	67376	NR_110487	328061	Mm.56067	NR_110487	ENSMUSG00000112792	Gm38407	4931412M21	predicted gene, 38407	ncRNA
978	chr12	71446162	71447204	+	2.47	8.41	5.94	1.19e-06	Intergenic	Intergenic	-62475	NR_136902	67348	Mm.54261	NR_136902	ENSMUSG00000100668	1700083H02Rik	100041190|Gm3190	RIKEN cDNA 1700083H02 gene	ncRNA
979	chr9	102907550	102908169	+	2.88	8.1	5.22	1.2e-06	3' UTR (NM_013649, exon 15 of 15)	3' UTR (NM_013649, exon 15 of 15)	72939	NM_001284258	20187	Mm.335391	NM_013649	ENSMUSG00000032547	Ryk	AW536699|ERK-3|Vik	receptor-like tyrosine kinase	protein-coding
980	chr2	51305198	51305934	+	2.42	8.32	5.9	1.2e-06	Intergenic	AmnSINE1|SINE|Deu	63735	NR_040636	329404	Mm.417725	NR_040636	ENSMUSG00000086349	Gm13497	A730015I17	predicted gene 13497	ncRNA
981	chr8	79325339	79325905	+	-2.48	6.04	8.53	1.2e-06	Intergenic	Intergenic	30544	NR_045822	234479	Mm.238026	NR_045822		Gm4890	A630049P17	predicted gene 4890	ncRNA
982	chr13	30418624	30418984	+	3.01	7.57	4.56	1.21e-06	Intergenic	Intergenic	82448	NM_177322	11607	Mm.35062	NM_177322	ENSMUSG00000049115	Agtr1a	1810074K20Rik|AG2S|AI551199|AT1|AT1a|AT2R1|AT2R1A|Agtr-1a|Agtr1|Angtr-1a	angiotensin II receptor, type 1a	protein-coding
983	chr4	65508129	65508540	+	2.99	7.67	4.69	1.21e-06	intron (NM_207109, intron 19 of 22)	intron (NM_207109, intron 19 of 22)	-96652	NM_001161782	69807	Mm.22786	NM_053084	ENSMUSG00000051675	Trim32	1810045E12Rik|3f3|BBS11|Zfp117	tripartite motif-containing 32	protein-coding
984	chr5	125235746	125236258	+	2.85	8.02	5.17	1.21e-06	Intergenic	Intergenic	-56788	NM_001253905	20602	Mm.278646	NM_011424	ENSMUSG00000029478	Ncor2	N-CoR|SMRT|SMRTe	nuclear receptor co-repressor 2	protein-coding
985	chr4	149849057	149849429	+	3.7	7.19	3.49	1.23e-06	Intergenic	Intergenic	-74976	NM_027460	70556	Mm.41877	NM_027460	ENSMUSG00000028982	Slc25a33	5730438N18Rik|Pnc1	solute carrier family 25, member 33	protein-coding
986	chr1	72002392	72002799	+	3.17	7.34	4.17	1.24e-06	intron (NR_040454, intron 1 of 2)	intron (NR_040454, intron 1 of 2)	2600	NR_040454	71134	Mm.370574	NR_040454	ENSMUSG00000101848	4933417E11Rik	-	RIKEN cDNA 4933417E11 gene	ncRNA
987	chr4	58278399	58278814	+	2.86	7.54	4.68	1.24e-06	Intergenic	Intergenic	-7356	NM_010944	18198	Mm.16148	NM_010944	ENSMUSG00000057280	Musk	Mdk4|Mlk|Nsk1|Nsk2|Nsk3	muscle, skeletal, receptor tyrosine kinase	protein-coding
988	chr3	121635427	121635932	+	2.56	7.94	5.37	1.24e-06	non-coding (NR_036456, exon 4 of 4)	non-coding (NR_036456, exon 4 of 4)	7806	NR_036456	100503044	Mm.65320	NM_176992	ENSMUSG00000044522	A730020M07Rik	-	RIKEN cDNA A730020M07 gene	ncRNA
989	chr2	52533711	52534262	+	3.07	7.44	4.38	1.25e-06	intron (NM_001037099, intron 2 of 13)	intron (NM_001037099, intron 2 of 13)	24625	NM_001285427	12298	Mm.330223	NM_146123	ENSMUSG00000017412	Cacnb4	3110038O15Rik|Cchb4|lh	calcium channel, voltage-dependent, beta 4 subunit	protein-coding
990	chr5	74632391	74633139	+	2.32	7.8	5.49	1.25e-06	intron (NM_001159577, intron 2 of 10)	intron (NM_001159577, intron 2 of 10)	45107	NM_010727	16924	Mm.440403	NM_010727	ENSMUSG00000029228	Lnx1	Lnx	ligand of numb-protein X 1	protein-coding
991	chr3	151437556	151438221	+	-2.15	6.07	8.22	1.25e-06	promoter-TSS (NM_133222)	promoter-TSS (NM_133222)	6	NM_133222	170757	Mm.317261	NM_133222	ENSMUSG00000039167	Adgrl4	1110033N21Rik|ETL1|Eltd1|Etl	adhesion G protein-coupled receptor L4	protein-coding
992	chr18	84994576	84995114	+	2.6	7.93	5.33	1.26e-06	Intergenic	L1M5|LINE|L1	-43321	NM_025969	67105	Mm.250617	NM_025969	ENSMUSG00000024645	Timm21	1700034H14Rik|2700002I20Rik	translocase of inner mitochondrial membrane 21	protein-coding
993	chr11	72526227	72526547	+	2.71	7.64	4.94	1.27e-06	intron (NM_029932, intron 8 of 11)	intron (NM_029932, intron 8 of 11)	23859	NM_029932	77577	Mm.46185	NM_029932	ENSMUSG00000020798	Spns3	9830002I17Rik	spinster homolog 3	protein-coding
994	chr5	53325908	53326460	+	1.99	8.53	6.54	1.27e-06	Intergenic	Intergenic	59078	NM_001145433	66278	Mm.27900	NM_001145433	ENSMUSG00000061461	Smim20	1110067B18Rik|1810013D10Rik|N28078	small integral membrane protein 20	protein-coding
995	chr8	110800765	110801223	+	2.69	8.01	5.33	1.28e-06	intron (NM_029646, intron 1 of 7)	intron (NM_029646, intron 1 of 7)	4930	NM_029646	76527	Mm.77697	NM_029646	ENSMUSG00000031750	Il34	2010004A03Rik|AI593503	interleukin 34	protein-coding
996	chr8	32334431	32334966	+	3.38	7.08	3.69	1.29e-06	Intergenic	Intergenic	182803	NR_046039	666589	Mm.367675	NR_046039		Gm8179	EG666589	predicted gene 8179	ncRNA
997	chr5	127336012	127336553	+	3.01	7.69	4.69	1.29e-06	intron (NM_175432, intron 1 of 8)	(CCCCCG)n|Simple_repeat|Simple_repeat	-54659	NR_038128	67351	Mm.320172	NR_038127	ENSMUSG00000087104	Tmem132cos	1700085B03Rik	transmembrane protein 132C, opposite strand	ncRNA
998	chr19	28436456	28437102	+	2.74	7.67	4.93	1.29e-06	intron (NM_175459, intron 4 of 10)	intron (NM_175459, intron 4 of 10)	-241445	NR_045330	320176	Mm.406716	NR_045330	ENSMUSG00000097735	D930032P07Rik	-	RIKEN cDNA D930032P07 gene	ncRNA
999	chr17	50101407	50101997	+	2.72	7.66	4.94	1.29e-06	intron (NM_181397, intron 3 of 9)	intron (NM_181397, intron 3 of 9)	88795	NM_181397	76438	Mm.41854	NM_181397	ENSMUSG00000039316	Rftn1	2310015N21Rik|AI853526	raftlin lipid raft linker 1	protein-coding
1000	chr6	118322855	118323879	+	2.29	8.76	6.47	1.29e-06	Intergenic	Intergenic	-14648	NR_110507	102632423	Mm.261755	NR_110507	ENSMUSG00000107933	Gm30498	-	predicted gene, 30498	ncRNA
1001	chr13	60897252	60897981	+	-2.03	7.51	9.54	1.29e-06	promoter-TSS (NM_001145801)	promoter-TSS (NM_001145801)	-169	NM_001145801	13025	Mm.30144	NM_007797	ENSMUSG00000074874	Ctla2b	AW545568|Ctla-2b	cytotoxic T lymphocyte-associated protein 2 beta	protein-coding
1002	chr1	151045384	151045674	+	3.11	7.28	4.17	1.3e-06	Intergenic	Intergenic	-52094	NM_001024720	545370	Mm.379425	NM_001024720	ENSMUSG00000066842	Hmcn1	EG545370|FIBL-6|Gm201	hemicentin 1	protein-coding
1003	chr4	119717476	119717788	+	3.34	7.56	4.22	1.31e-06	Intergenic	Intergenic	-58687	NM_008191	14916	Mm.278	NM_008191	ENSMUSG00000032978	Guca2b	AV066530|Gcap2|Ugn	guanylate cyclase activator 2b (retina)	protein-coding
1004	chr6	91207500	91208199	+	2.61	7.57	4.96	1.31e-06	Intergenic	Intergenic	-4915	NM_001081437	14115	Mm.249146	NM_007992	ENSMUSG00000064080	Fbln2	5730577E14Rik|FIBL-2	fibulin 2	protein-coding
1005	chr5	33239102	33240364	+	2.14	8.42	6.28	1.31e-06	Intergenic	MTC|LTR|ERVL-MaLR	-21495	NM_133903	100689	Mm.34694	NM_133903	ENSMUSG00000037379	Spon2	2310045I24Rik|AI504350|M-spondin|Mindin|Mspondin	spondin 2, extracellular matrix protein	protein-coding
1006	chr13	43801911	43802301	+	2.99	7.32	4.33	1.33e-06	3' UTR (NM_001289915, exon 5 of 5)	3' UTR (NM_001289915, exon 5 of 5)	16994	NM_001289915	12522	Mm.57175	NM_009856	ENSMUSG00000015396	Cd83	-	CD83 antigen	protein-coding
1007	chr14	70170181	70171091	+	2.45	8.64	6.19	1.33e-06	intron (NM_145978, intron 6 of 9)	intron (NM_145978, intron 6 of 9)	6179	NM_001253736	213019	Mm.283968	NM_145978	ENSMUSG00000022090	Pdlim2	4732462F18Rik|Slim	PDZ and LIM domain 2	protein-coding
1008	chr2	62573356	62574170	+	2.87	7.8	4.93	1.34e-06	intron (NM_007986, intron 1 of 25)	intron (NM_007986, intron 1 of 25)	258	NM_007986	14089	Mm.41816	NM_007986	ENSMUSG00000000392	Fap	SIMP	fibroblast activation protein	protein-coding
1009	chr3	55600350	55600662	+	2.71	7.56	4.85	1.34e-06	Intergenic	Intergenic	138778	NM_001357476	13175	Mm.393242	NM_019978	ENSMUSG00000027797	Dclk1	1700113D08Rik|2810480F11Rik|AI836758|Click-I|Cpg16|Dcamkl1|Dcl|Dclk|mKIAA0369	doublecortin-like kinase 1	protein-coding
1010	chr3	60740528	60740992	+	2.68	7.48	4.8	1.35e-06	Intergenic	Intergenic	239581	NM_001253711	56758	Mm.255723	NM_020007	ENSMUSG00000027763	Mbnl1	Mbnl|mKIAA0428	muscleblind like splicing factor 1	protein-coding
1011	chr19	21439058	21439829	+	2.53	8.12	5.59	1.35e-06	intron (NM_010266, intron 1 of 13)	intron (NM_010266, intron 1 of 13)	33218	NM_010266	14544	Mm.45054	NM_010266	ENSMUSG00000058624	Gda	AU015411|AW047581|GAH	guanine deaminase	protein-coding
1012	chr14	64726942	64727474	+	3.04	7.73	4.69	1.38e-06	intron (NM_001081177, intron 9 of 39)	intron (NM_001081177, intron 9 of 39)	74677	NM_001081177	16554	Mm.23611	NM_001081177	ENSMUSG00000060012	Kif13b	5330429L19Rik|6030414C01|AI429803|C130021D12Rik|GAKIN	kinesin family member 13B	protein-coding
1013	chr19	12496179	12496618	+	3	7.4	4.39	1.38e-06	intron (NM_172442, intron 1 of 8)	intron (NM_172442, intron 1 of 8)	5598	NM_172442	207521	Mm.247695	NM_172442	ENSMUSG00000039982	Dtx4	AI449438|BC044798|D930042H13|RNF155	deltex 4, E3 ubiquitin ligase	protein-coding
1014	chr11	68213828	68214834	+	2.35	7.99	5.64	1.38e-06	intron (NM_008744, intron 6 of 6)	B4A|SINE|B4	-6561	NR_105833	102465219		NR_105833	ENSMUSG00000099174	Mir6406	Gm27981|mmu-mir-6406	microRNA 6406	ncRNA
1015	chr1	38262299	38262796	+	3	7.94	4.94	1.39e-06	intron (NM_001290814, intron 9 of 21)	intron (NM_001290814, intron 9 of 21)	130464	NR_151587	329123	Mm.207123	NR_151587	ENSMUSG00000102716	Gm5099	EG329123	predicted gene 5099	ncRNA
1016	chr13	113527042	113527468	+	2.79	7.57	4.78	1.39e-06	Intergenic	Intergenic	-24411	NR_045501	70917	Mm.491036	NR_045501	ENSMUSG00000114790	4921509O07Rik	-	RIKEN cDNA 4921509O07 gene	ncRNA
1017	chr10	8752322	8753058	+	2.57	8.67	6.1	1.4e-06	intron (NM_175155, intron 9 of 19)	intron (NM_175155, intron 9 of 19)	133380	NM_175155	70097	Mm.338275	NM_175155	ENSMUSG00000015305	Sash1	1100001C18Rik|2500002E12Rik|A330076K04Rik|mKIAA0790	SAM and SH3 domain containing 1	protein-coding
1018	chr2	158247969	158248841	+	2.31	9.16	6.85	1.4e-06	Intergenic	Intergenic	-4840	NR_106156	102466240		NR_106156	ENSMUSG00000098765	Mir7685	Gm27757|mmu-mir-7685	microRNA 7685	ncRNA
1019	chr12	71788775	71789266	+	2.48	7.67	5.19	1.41e-06	Intergenic	Intergenic	-42048	NM_026102	208846	Mm.87417	NM_026102	ENSMUSG00000034574	Daam1	-	dishevelled associated activator of morphogenesis 1	protein-coding
1020	chr2	31537014	31537555	+	2.45	8.4	5.96	1.41e-06	Intergenic	Intergenic	-35367	NM_001290548	320267	Mm.207261	NM_001033389	ENSMUSG00000026843	Fubp3	A330051M14Rik|AV006371|FBP3|Marta2	far upstream element (FUSE) binding protein 3	protein-coding
1021	chr15	34336273	34336986	+	2.43	8.01	5.58	1.41e-06	intron (NM_001358780, intron 2 of 18)	intron (NM_001358780, intron 2 of 18)	21243	NM_001256161	77358	Mm.402759	NM_001256161	ENSMUSG00000094447	9430069I07Rik	-	RIKEN cDNA 9430069I07 gene	protein-coding
1022	chr7	117470044	117471000	+	2.4	8.53	6.13	1.43e-06	intron (NM_175645, intron 1 of 11)	intron (NM_175645, intron 1 of 11)	89543	NM_175645	233781	Mm.461427	NM_175645	ENSMUSG00000030657	Xylt1	8030490L12	xylosyltransferase 1	protein-coding
1023	chr10	76731250	76733856	+	1.74	10.2	8.46	1.43e-06	Intergenic	Intergenic	-6509	NM_009933	12833	Mm.2509	NM_009933	ENSMUSG00000001119	Col6a1	AI747156|Col6a-1	collagen, type VI, alpha 1	protein-coding
1024	chr3	94610439	94610975	+	2.73	7.46	4.73	1.44e-06	Intergenic	Intergenic	-27991	NM_029721	76742	Mm.28160	NM_029721	ENSMUSG00000028136	Snx27	5730552M22Rik|ESTM45|ESTM47|R75405	sorting nexin family member 27	protein-coding
1025	chr18	83839376	83840410	+	2.68	8.43	5.74	1.46e-06	Intergenic	Intergenic	246669	NM_001081300	110796	Mm.102136	NM_001081300	ENSMUSG00000046982	Tshz1	5730407I04Rik|D18Bwg1409e|Mtsh1|NY-CO-33|Sdccag33|Tsh1|mKIAA4206|teashirt1	teashirt zinc finger family member 1	protein-coding
1026	chr1	90509066	90509847	+	2.68	8.46	5.77	1.46e-06	Intergenic	MIR3|SINE|MIR	-93969	NM_133805	108679	Mm.119177	NM_133805	ENSMUSG00000034432	Cops8	9430009J09Rik|AA408242|Csn8|Sgn8	COP9 signalosome subunit 8	protein-coding
1027	chr4	15205642	15206413	+	2.65	8.35	5.7	1.46e-06	Intergenic	Intergenic	-56896	NM_178617	69352	Mm.389031	NM_178617	ENSMUSG00000040536	Necab1	1700003H21Rik|Efcbp1|STIP-1	N-terminal EF-hand calcium binding protein 1	protein-coding
1028	chr2	13400704	13401223	+	3.12	7.65	4.53	1.47e-06	intron (NM_001081084, intron 28 of 66)	intron (NM_001081084, intron 28 of 66)	90913	NM_001081084	65969	Mm.313915	NM_001081084	ENSMUSG00000026726	Cubn	AA408369|AL022750|D2Wsu88e	cubilin (intrinsic factor-cobalamin receptor)	protein-coding
1029	chr1	134229828	134230626	+	2.84	8.07	5.23	1.47e-06	intron (NM_001291930, intron 1 of 1)	intron (NM_001291930, intron 1 of 1)	4629	NM_001291928	11539	Mm.298908	NM_009629	ENSMUSG00000042429	Adora1	A1-AR|A1AR|A1R|AA1R|AI848715|BB176431|Ri	adenosine A1 receptor	protein-coding
1030	chr11	109878509	109879330	+	2.78	8.12	5.35	1.47e-06	Intergenic	Intergenic	33041	NR_045909	73257	Mm.250442	NR_045909	ENSMUSG00000087393	1700023C21Rik	-	RIKEN cDNA 1700023C21 gene	ncRNA
1031	chr6	84325427	84326105	+	2.31	8.07	5.77	1.48e-06	Intergenic	Intergenic	98072	NR_046063	100038556	Mm.387783	NR_046063	ENSMUSG00000107797	Gm10445	-	predicted gene 10445	ncRNA
1032	chr16	10821204	10821788	+	2.82	8.09	5.27	1.49e-06	Intergenic	Intergenic	-13563	NM_001162932	223970	Mm.325777	NM_001033278	ENSMUSG00000037991	Rmi2	A630055G03Rik|Gm537|Gm929	RecQ mediated genome instability 2	protein-coding
1033	chr2	137436073	137436540	+	2.54	8.1	5.56	1.49e-06	Intergenic	Intergenic	-319786	NM_013822	16449	Mm.22398	NM_013822	ENSMUSG00000027276	Jag1	ABE2|Gsfabe2|Htu|Ozz|Ser-1	jagged 1	protein-coding
1034	chr2	61407955	61408228	+	3.34	6.86	3.52	1.5e-06	Intergenic	Intergenic	-170495	NM_011529	21353	Mm.244393	NM_011529	ENSMUSG00000064289	Tank	C86182|E430026L09Rik|I-TRAF	TRAF family member-associated Nf-kappa B activator	protein-coding
1035	chr5	149947505	149947879	+	2.95	7.51	4.56	1.52e-06	Intergenic	Intergenic	-70983	NM_001289566	140498	Mm.444643	NM_080468	ENSMUSG00000053368	Rxfp2	Gpr106|Great|Lgr8	relaxin/insulin-like family peptide receptor 2	protein-coding
1036	chr12	119110066	119110535	+	2.35	7.95	5.6	1.52e-06	Intergenic	ORR1F|LTR|ERVL-MaLR	127976	NM_177290	320910	Mm.217000	NM_177290	ENSMUSG00000025321	Itgb8	4832412O06Rik	integrin beta 8	protein-coding
1037	chr6	72241321	72242296	+	1.96	8.61	6.64	1.53e-06	Intergenic	Intergenic	-6231	NM_153778	71093	Mm.87449	NM_153778	ENSMUSG00000037621	Atoh8	4933425C05Rik|Hath6|Math6|bHLHa21|okadin	atonal bHLH transcription factor 8	protein-coding
1038	chrX	71812114	71812460	+	3.69	7.06	3.37	1.54e-06	Intergenic	Intergenic	-3793	NM_001290781	67048	Mm.41102	NM_001081356	ENSMUSG00000073131	Vma21	2610030H06Rik|AI840175	VMA21 vacuolar H+-ATPase homolog (S. cerevisiae)	protein-coding
1039	chr19	17471783	17472257	+	3.34	7.05	3.71	1.54e-06	intron (NM_001190483, intron 27 of 37)	intron (NM_001190483, intron 27 of 37)	77977	NM_019437	54391	Mm.7013	NM_019437	ENSMUSG00000024712	Rfk	0610038L10Rik|AF031381|KOI-4	riboflavin kinase	protein-coding
1040	chr1	90743985	90744418	+	2.89	7.35	4.47	1.55e-06	Intergenic	Intergenic	99770	NM_001243009	12835	Mm.7562	NM_009935	ENSMUSG00000048126	Col6a3	AI507288|Col6a-3	collagen, type VI, alpha 3	protein-coding
1041	chr10	99297701	99298041	+	3.71	6.65	2.94	1.56e-06	Intergenic	L2c|LINE|L2	34640	NM_026268	67603	Mm.1791	NM_026268	ENSMUSG00000019960	Dusp6	1300019I03Rik|MKP-3|MKP3|PYST1	dual specificity phosphatase 6	protein-coding
1042	chr4	117052680	117053234	+	3.04	7.71	4.66	1.56e-06	intron (NM_001111277, intron 5 of 11)	intron (NM_001111277, intron 5 of 11)	33555	NM_001355225	108067	Mm.34612	NM_175135	ENSMUSG00000028683	Eif2b3	1190002P15Rik	eukaryotic translation initiation factor 2B, subunit 3	protein-coding
1043	chr10	22981748	22982376	+	2.83	7.93	5.1	1.56e-06	Intergenic	Intergenic	-161934	NM_011545	21412	Mm.16497	NM_011545	ENSMUSG00000045680	Tcf21	Pod-1|Pod1|bHLHa23|capsulin|epc|epicardin	transcription factor 21	protein-coding
1044	chr9	105758244	105759229	+	2.5	8.36	5.85	1.56e-06	intron (NM_001102607, intron 13 of 36)	intron (NM_001102607, intron 13 of 36)	50912	NM_172927	245026	Mm.482507	NM_172927	ENSMUSG00000043719	Col6a6	E330019B14|E330026B02Rik	collagen, type VI, alpha 6	protein-coding
1045	chr3	90556032	90556387	+	2.86	7.6	4.74	1.57e-06	Intergenic	HAL1b|LINE|L1	15048	NM_026416	67860	Mm.331185	NM_026416	ENSMUSG00000074457	S100a16	2300002L21Rik|AI325039|AI663996|DT1P1A7|S100F	S100 calcium binding protein A16	protein-coding
1046	chr11	105934058	105935221	+	2.3	8.55	6.26	1.6e-06	3' UTR (NM_007805, exon 6 of 6)	3' UTR (NM_007805, exon 6 of 6)	9848	NM_007805	13056	Mm.149403	NM_007805	ENSMUSG00000019590	Cyb561	-	cytochrome b-561	protein-coding
1047	chr11	113785160	113786333	+	2.15	9.03	6.88	1.6e-06	intron (NM_172800, intron 44 of 44)	intron (NM_172800, intron 44 of 44)	-33931	NM_001163346	56699	Mm.293378	NM_020006	ENSMUSG00000041598	Cdc42ep4	1500041M20Rik|Borg4|CEP4	CDC42 effector protein (Rho GTPase binding) 4	protein-coding
1048	chr13	44260052	44261536	+	1.92	9.42	7.5	1.6e-06	Intergenic	Intergenic	-44307	NR_045088	100503592	Mm.184925	NR_045088	ENSMUSG00000113186	A330076C08Rik	-	RIKEN cDNA A330076C08 gene	ncRNA
1049	chr17	46667652	46668177	+	2.57	8.58	6.01	1.61e-06	3' UTR (NM_144857, exon 7 of 7)	3' UTR (NM_144857, exon 7 of 7)	6341	NM_144857	224823	Mm.45101	NM_144857	ENSMUSG00000023971	Rrp36	-	ribosomal RNA processing 36 homolog (S. cerevisiae)	protein-coding
1050	chr4	64594973	64595682	+	1.9	9.07	7.17	1.61e-06	Intergenic	Intergenic	-318724	NR_151546	102633436	Mm.411637	NR_151546		Gm11217	-	predicted gene 11217	ncRNA
1051	chr3	58162159	58162791	+	-2.11	6.26	8.37	1.63e-06	intron (NR_040538, intron 2 of 5)	intron (NR_040538, intron 2 of 5)	1332	NR_040538	67850	Mm.416968	NR_040538	ENSMUSG00000100666	1700007F19Rik	-	RIKEN cDNA 1700007F19 gene	ncRNA
1052	chr3	55241682	55243187	+	2.14	9.45	7.31	1.64e-06	promoter-TSS (NM_001357469)	promoter-TSS (NM_001357469)	70	NM_001111053	13175	Mm.393242	NM_019978	ENSMUSG00000027797	Dclk1	1700113D08Rik|2810480F11Rik|AI836758|Click-I|Cpg16|Dcamkl1|Dcl|Dclk|mKIAA0369	doublecortin-like kinase 1	protein-coding
1053	chr9	22800579	22801170	+	-2.34	6.68	9.01	1.64e-06	intron (NM_001360259, intron 20 of 22)	intron (NM_001360259, intron 20 of 22)	325159	NM_001360259	319845	Mm.176725	NM_178415	ENSMUSG00000035919	Bbs9	E130103I17Rik	Bardet-Biedl syndrome 9 (human)	protein-coding
1054	chr4	58605862	58606415	+	2.9	7.15	4.26	1.65e-06	Intergenic	Intergenic	-52647	NM_010336	14745	Mm.4772	NM_010336	ENSMUSG00000038668	Lpar1	AI326300|Edg2|Gpcr26|Kdt2|lpA1|vzg-1	lysophosphatidic acid receptor 1	protein-coding
1055	chr10	88296863	88297291	+	2.99	7.46	4.47	1.66e-06	Intergenic	Intergenic	59998	NM_027878	71712	Mm.35450	NM_027878	ENSMUSG00000020057	Dram1	1200002N14Rik|Dram	DNA-damage regulated autophagy modulator 1	protein-coding
1056	chr15	68878738	68879131	+	2.92	7.32	4.41	1.67e-06	intron (NR_155443, intron 1 of 2)	intron (NR_155443, intron 1 of 2)	619	NR_155443	105245971	Mm.380365	NR_155443	ENSMUSG00000069996	Gm41341	-	predicted gene, 41341	ncRNA
1057	chr11	53507097	53507586	+	2.76	8.18	5.42	1.67e-06	Intergenic	Intergenic	-12395	NM_033144	20362	Mm.274399	NM_033144	ENSMUSG00000018398	2020-09-08	AW046166|Sepl	septin 8	protein-coding
1058	chr10	71192721	71193668	+	2.59	8.31	5.72	1.67e-06	Intergenic	Intergenic	-8551	NR_131003	78638	Mm.71171	NR_131003	ENSMUSG00000112028	1700113B09Rik	-	RIKEN cDNA 1700113B09 gene	ncRNA
1059	chr10	76642857	76643751	+	2.37	8.08	5.71	1.67e-06	Intergenic	Intergenic	-19674	NM_001347207	12834	Mm.1949	NM_146007	ENSMUSG00000020241	Col6a2	Col6a-2	collagen, type VI, alpha 2	protein-coding
1060	chr7	113147488	113148585	+	1.95	9.14	7.19	1.67e-06	Intergenic	Intergenic	-6021	NR_045978	75239	Mm.381688	NR_045978	ENSMUSG00000110009	4930543E12Rik	4930545H14Rik	RIKEN cDNA 4930543E12 gene	ncRNA
1061	chr12	69751665	69752376	+	-1.94	6.63	8.58	1.67e-06	intron (NM_183294, intron 7 of 9)	intron (NM_183294, intron 7 of 9)	11924	NR_030450	751538		NR_030450	ENSMUSG00000076065	Mir681	Mirn681|mmu-mir-681	microRNA 681	ncRNA
1062	chr15	55002322	55002933	+	3.08	6.84	3.76	1.69e-06	Intergenic	L1M4b|LINE|L1	-15764	NR_155513	100039911	Mm.252735	NR_155513	ENSMUSG00000115245	Gm2491	4930478E11Rik	predicted gene 2491	ncRNA
1063	chr6	51150018	51150780	+	2.74	8.13	5.39	1.71e-06	Intergenic	Intergenic	119511	NR_029719	387166		NR_029719	ENSMUSG00000065505	Mir148a	Mirn148|Mirn148a|mir-148a	microRNA 148a	ncRNA
1064	chr18	58889766	58890330	+	2.5	7.48	4.98	1.71e-06	intron (NM_175506, intron 2 of 22)	intron (NM_175506, intron 2 of 22)	53685	NM_175506	240322	Mm.71963	NM_175506	ENSMUSG00000053441	Adamts19	4831407I23Rik|AU015154|D230034E10Rik	a disintegrin-like and metallopeptidase (reprolysin type) with thrombospondin type 1 motif, 19	protein-coding
1065	chr2	93380536	93381138	+	-2.33	5.49	7.82	1.71e-06	Intergenic	Intergenic	-22710	NR_040529	639658	Mm.66880	NR_040529	ENSMUSG00000085852	Gm13807	-	predicted gene 13807	ncRNA
1066	chr3	132211178	132211726	+	2.71	7.75	5.04	1.74e-06	Intergenic	RMER15|LTR|ERVL	126160	NM_020265	56811	Mm.103593	NM_020265	ENSMUSG00000028031	Dkk2	-	dickkopf WNT signaling pathway inhibitor 2	protein-coding
1067	chr14	30045153	30046128	+	2.11	8.19	6.08	1.74e-06	intron (NM_001083616, intron 44 of 46)	intron (NM_001083616, intron 44 of 46)	23007	NM_175343	218865	Mm.259916	NM_172264	ENSMUSG00000015970	Chdh	AU041472|D630034H06Rik	choline dehydrogenase	protein-coding
1068	chr2	168016889	168017601	+	2.45	8.22	5.78	1.75e-06	Intergenic	Intergenic	-6652	NM_001080708	69553	Mm.68454	NM_001080708	ENSMUSG00000074577	Ripor3	2310033K02Rik|Fam65c|Gm124	RIPOR family member 3	protein-coding
1069	chr8	12925684	12926776	+	-2.04	6.99	9.03	1.76e-06	intron (NM_178076, intron 1 of 30)	intron (NM_178076, intron 1 of 30)	10337	NM_178076	17207	Mm.334413	NM_178076	ENSMUSG00000031442	Mcf2l	C130040G20Rik|Dbs|Ost|mKIAA0362	mcf.2 transforming sequence-like	protein-coding
1070	chr7	38229942	38231034	+	2.18	8.87	6.69	1.77e-06	Intergenic	Intergenic	-2494	NM_024413	72287	Mm.333798	NM_024413	ENSMUSG00000074170	Plekhf1	1810013P09Rik|APPD|LAPF|PHAFIN1|ZFYVE15	pleckstrin homology domain containing, family F (with FYVE domain) member 1	protein-coding
1071	chr1	40230251	40230652	+	3.01	8.15	5.14	1.78e-06	intron (NM_008362, intron 1 of 10)	intron (NM_008362, intron 1 of 10)	5371	NM_008362	16177	Mm.896	NM_008362	ENSMUSG00000026072	Il1r1	CD121a|CD121b|IL-1R1|IL-iR|Il1r-1	interleukin 1 receptor, type I	protein-coding
1072	chr18	5519982	5520389	+	2.67	7.6	4.93	1.78e-06	intron (NR_033552, intron 6 of 6)	intron (NR_033552, intron 6 of 6)	-71675	NM_011546	21417	Mm.3929	NM_011546	ENSMUSG00000024238	Zeb1	3110032K11Rik|AREB6|BZP|MEB1|Nil2|TCF-8|Tcf18|Tcf8|Tw|ZEB|Zfhep|Zfhx1a|Zfx1a|Zfx1ha|[delta]EF1	zinc finger E-box binding homeobox 1	protein-coding
1073	chr4	138017938	138018396	+	2.66	7.84	5.19	1.78e-06	intron (NM_001355699, intron 1 of 32)	intron (NM_001355699, intron 1 of 32)	20342	NM_001355699	230861	Mm.268903	NM_172703	ENSMUSG00000028760	Eif4g3	1500002J22Rik|4930523M17Rik|G1-419-52|eIF4GII|repro8	eukaryotic translation initiation factor 4 gamma, 3	protein-coding
1074	chr18	85304897	85305485	+	2.42	7.98	5.57	1.78e-06	Intergenic	LTR16E2|LTR|ERVL	-353667	NM_025969	67105	Mm.250617	NM_025969	ENSMUSG00000024645	Timm21	1700034H14Rik|2700002I20Rik	translocase of inner mitochondrial membrane 21	protein-coding
1075	chr3	27518945	27520301	+	1.87	9.35	7.48	1.78e-06	intron (NM_001356953, intron 7 of 26)	intron (NM_001356953, intron 7 of 26)	65372	NR_037275	100526525		NR_037275	ENSMUSG00000092695	Mir3092	mir-3092|mmu-mir-3092	microRNA 3092	ncRNA
1076	chr6	32167578	32168189	+	2.9	7.68	4.78	1.8e-06	intron (NM_175750, intron 25 of 31)	MER91C|DNA|hAT-Tip100	117595	NM_029587	76382	Mm.23510	NM_029587	ENSMUSG00000029766	1700012A03Rik	AI429084	RIKEN cDNA 1700012A03 gene	protein-coding
1077	chr2	59526761	59527774	+	-2.28	6.11	8.39	1.82e-06	Intergenic	Intergenic	42614	NM_029723	76747	Mm.275769	NM_029723	ENSMUSG00000026989	Dapl1	2310032F03Rik|EEDA	death associated protein-like 1	protein-coding
1078	chr2	73188516	73188801	+	3.23	6.92	3.69	1.83e-06	intron (NM_030091, intron 4 of 7)	intron (NM_030091, intron 4 of 7)	25789	NM_025942	67059	Mm.22661	NM_025942	ENSMUSG00000027108	Ola1	2510025G09Rik|2810405J23Rik|2810409H07Rik|Gtpbp9|PTD004	Obg-like ATPase 1	protein-coding
1079	chr17	47112868	47113159	+	3.14	7.01	3.87	1.83e-06	Intergenic	Intergenic	-27929	NM_001097623	224829	Mm.260989	NM_172622		Trerf1	9430096I18Rik|AI429294|B830015H24|RAPA|Trep-132|Trep132	transcriptional regulating factor 1	protein-coding
1080	chr9	63711488	63712000	+	2.83	7.86	5.04	1.84e-06	intron (NM_016769, intron 1 of 8)	intron (NM_016769, intron 1 of 8)	46250	NM_016769	17127	Mm.7320	NM_016769	ENSMUSG00000032402	Smad3	AU022421|Madh3	SMAD family member 3	protein-coding
1081	chr2	126360556	126361078	+	2.25	8.06	5.81	1.85e-06	intron (NM_001359975, intron 21 of 27)	intron (NM_001359975, intron 21 of 27)	130736	NM_001080944	241633	Mm.222235	NM_001080944	ENSMUSG00000060131	Atp8b4	Im	ATPase, class I, type 8B, member 4	protein-coding
1082	chr19	56545028	56545616	+	2.6	7.98	5.38	1.88e-06	exon (NM_018831, exon 3 of 10)	exon (NM_018831, exon 3 of 10)	2800	NR_153440	55947	Mm.2805	NM_018831	ENSMUSG00000025077	Dclre1a	2810043H12Rik|AU022226|Pso2|Smn1a|Snm1|mKIAA0086	DNA cross-link repair 1A	protein-coding
1083	chr10	71048887	71049715	+	2.43	8.19	5.76	1.88e-06	intron (NM_031397, intron 2 of 20)	intron (NM_031397, intron 2 of 20)	110389	NM_001347189	83675	Mm.286834	NM_031397	ENSMUSG00000014329	Bicc1	Bic-C|bpk|jcpk	BicC family RNA binding protein 1	protein-coding
1084	chr1	163386068	163386599	+	2.94	7.39	4.46	1.89e-06	non-coding (NR_132627, exon 6 of 6)	non-coding (NR_132627, exon 6 of 6)	17336	NM_178883	98376	Mm.32901	NM_178883	ENSMUSG00000040124	Gorab	NTKL-BP1|SCYL1-BP1|Scyl1bp1	golgin, RAB6-interacting	protein-coding
1085	chr2	35271771	35272372	+	2.54	8.58	6.03	1.89e-06	intron (NM_001206367, intron 2 of 17)	MIR3|SINE|MIR	5327	NM_001206369	227753	Mm.443	NM_146120	ENSMUSG00000026879	Gsn	ADF	gelsolin	protein-coding
1086	chr6	115896864	115897825	+	2.13	8.85	6.71	1.89e-06	intron (NM_001167763, intron 14 of 28)	intron (NM_001167763, intron 14 of 28)	-34583	NM_145383	212541	Mm.2965	NM_145383	ENSMUSG00000030324	Rho	Noerg1|Opn2|Ops|RP4	rhodopsin	protein-coding
1087	chr3	122814497	122815112	+	3.38	6.95	3.56	1.92e-06	intron (NM_153422, intron 11 of 20)	intron (NM_153422, intron 11 of 20)	-12824	NR_045168	71647	Mm.449992	NR_045168	ENSMUSG00000106583	4930447N08Rik	-	RIKEN cDNA 4930447N08 gene	ncRNA
1088	chr17	14295007	14295512	+	3.15	7.27	4.12	1.92e-06	intron (NM_022315, intron 1 of 12)	intron (NM_022315, intron 1 of 12)	15753	NM_022315	64074	Mm.30162	NM_022315	ENSMUSG00000023886	Smoc2	1700056C05Rik|5430426J21Rik|Smoc2l	SPARC related modular calcium binding 2	protein-coding
1089	chr11	94913127	94914152	+	1.98	8.46	6.49	1.92e-06	Intergenic	MLT1K|LTR|ERVL-MaLR	-22585	NM_007742	12842	Mm.277735	NM_007742	ENSMUSG00000001506	Col1a1	Col1a-1|Cola-1|Cola1|Mov-13|Mov13	collagen, type I, alpha 1	protein-coding
1090	chr5	74904997	74905650	+	2.94	7.24	4.3	1.93e-06	Intergenic	MER102b|DNA|hAT-Charlie	-43871	NR_045866	619945	Mm.359372	NM_001037908	ENSMUSG00000072874	Gm6116	EG619945	predicted gene 6116	ncRNA
1091	chr9	71404268	71405284	+	2.7	8.59	5.9	1.94e-06	Intergenic	Intergenic	80182	NM_001164793	28015	Mm.21094	NM_178602	ENSMUSG00000032199	Polr2m	AA407243|AA408799|AI303746|AW553238|D9Wsu138e|Grinl1a|mKIAA4185	polymerase (RNA) II (DNA directed) polypeptide M	protein-coding
1092	chr12	110112237	110113076	+	2.6	7.89	5.29	1.94e-06	Intergenic	Intergenic	45417	NR_045466	67280	Mm.390495	NR_045466	ENSMUSG00000113331	3110009F21Rik	-	RIKEN cDNA 3110009F21 gene	ncRNA
1093	chr1	186695151	186695866	+	2.5	8.2	5.7	1.94e-06	intron (NM_001329107, intron 1 of 7)	intron (NM_001329107, intron 1 of 7)	10481	NM_009367	21808	Mm.18213	NM_009367	ENSMUSG00000039239	Tgfb2	BB105277|Tgf-beta2|Tgfb-2	transforming growth factor, beta 2	protein-coding
1094	chr14	93498948	93499609	+	2.59	8.35	5.77	1.95e-06	intron (NM_001271798, intron 2 of 3)	intron (NM_001271798, intron 2 of 3)	391391	NM_001271798	211712	Mm.37126	NM_001081377	ENSMUSG00000055421	Pcdh9	-	protocadherin 9	protein-coding
1095	chr7	96523614	96524156	+	3.19	7.15	3.96	1.96e-06	intron (NM_001310762, intron 4 of 32)	intron (NM_001310762, intron 4 of 32)	-181921	NR_046043	670727	Mm.421352	NR_046043	ENSMUSG00000085751	Gm15412	-	predicted gene 15412	ncRNA
1096	chr9	88085471	88086239	+	2.6	7.85	5.26	1.96e-06	Intergenic	(TAAA)n|Simple_repeat|Simple_repeat	-241754	NM_011851	23959	Mm.244235	NM_011851	ENSMUSG00000032420	Nt5e	2210401F01Rik|5'-NT|AI447961|CD73|NT|Nt5|eNT	5' nucleotidase, ecto	protein-coding
1097	chr11	106728271	106729224	+	2.24	8.81	6.56	1.96e-06	Intergenic	Intergenic	-13466	NM_001305158	18613	Mm.343951	NM_008816	ENSMUSG00000020717	Pecam1	C85791|Cd31|PECAM-1|Pecam	platelet/endothelial cell adhesion molecule 1	protein-coding
1098	chr2	127850431	127850843	+	3.54	7.01	3.47	1.98e-06	Intergenic	Intergenic	-3991	NM_028765	74121	Mm.244835	NM_028765	ENSMUSG00000027380	Acoxl	1200014P05Rik|AV025673	acyl-Coenzyme A oxidase-like	protein-coding
1099	chr7	97262422	97263099	+	2.09	8.7	6.61	1.98e-06	intron (NM_001162477, intron 2 of 9)	intron (NM_001162477, intron 2 of 9)	63204	NM_001177412	244144	Mm.297541	NM_001177412	ENSMUSG00000035713	Usp35	Gm1088|Gm493	ubiquitin specific peptidase 35	protein-coding
1100	chr3	157105653	157106336	+	2.75	7.6	4.84	1.99e-06	intron (NM_001039094, intron 4 of 6)	intron (NM_001039094, intron 4 of 6)	428096	NR_152231	381498	Mm.402095	NR_152231	ENSMUSG00000105834	4930592C13Rik	Gm1657|Gm43159	RIKEN cDNA 4930592C13 gene	ncRNA
1101	chr12	9921479	9922191	+	2.65	7.62	4.97	1.99e-06	Intergenic	MLT1E2|LTR|ERVL-MaLR	347393	NM_011859	23967	Mm.45055	NM_011859	ENSMUSG00000048387	Osr1	Odd1|Osr	odd-skipped related transcription factor 1	protein-coding
1102	chr1	157343568	157343862	+	2.94	7.48	4.55	2.01e-06	intron (NM_177644, intron 1 of 17)	intron (NM_177644, intron 1 of 17)	-68637	NR_027984	69953	Mm.286863	NM_027274	ENSMUSG00000049881	2810025M15Rik	AI429618	RIKEN cDNA 2810025M15 gene	ncRNA
1103	chr1	90333607	90334373	+	2.56	8.27	5.71	2.01e-06	Intergenic	Intergenic	130010	NM_001271607	12778	Mm.6522	NM_007722	ENSMUSG00000044337	Ackr3	AW541270|CXC-R7|CXCR-7|Cmkor1|Cxcr7|RDC-1|Rdc1	atypical chemokine receptor 3	protein-coding
1104	chr1	152414001	152414914	+	2.37	8.18	5.81	2.03e-06	intron (NM_177756, intron 1 of 11)	intron (NM_177756, intron 1 of 11)	14590	NM_177756	269132	Mm.23782	NM_177756	ENSMUSG00000032649	Colgalt2	AI427652|D730024P12|Glt25d2	collagen beta(1-O)galactosyltransferase 2	protein-coding
1105	chr12	9212221	9212583	+	2.75	7.4	4.65	2.04e-06	Intergenic	Intergenic	182405	NM_029321	75516	Mm.37581	NM_029321	ENSMUSG00000066637	Ttc32	1700013G20Rik	tetratricopeptide repeat domain 32	protein-coding
1106	chr4	40876707	40877700	+	1.96	9.47	7.51	2.04e-06	Intergenic	Intergenic	-22666	NM_022305	14595	Mm.15622	NM_022305	ENSMUSG00000028413	B4galt1	B-1,4-GalT|B-1,4-GalT1|GalT|Ggtb|Ggtb2|b4Gal-T1|beta-1,4-GalT|beta-1,4-GalT1|beta4Gal-T1	UDP-Gal:betaGlcNAc beta 1,4- galactosyltransferase, polypeptide 1	protein-coding
1107	chr2	151921274	151922036	+	2.62	8.21	5.6	2.06e-06	intron (NM_009641, intron 1 of 8)	intron (NM_009641, intron 1 of 8)	10448	NM_009641	11602	Mm.189536	NM_009641	ENSMUSG00000027460	Angpt4	ANG-3|ANG-4|Agpt4|Ang3	angiopoietin 4	protein-coding
1108	chr4	95463169	95463856	+	2.34	7.96	5.61	2.06e-06	Intergenic	Intergenic	-93995	NM_001113412	75578	Mm.276098	NM_029347	ENSMUSG00000028573	Fggy	2310009E04Rik	FGGY carbohydrate kinase domain containing	protein-coding
1109	chr19	43155612	43156289	+	2.57	7.48	4.91	2.07e-06	intron (NM_001081257, intron 3 of 11)	MIRb|SINE|MIR	232405	NM_001081257	545291	Mm.442200	NM_001081257	ENSMUSG00000074852	Hpse2	Gm968|Hpa2	heparanase 2	protein-coding
1110	chr10	83974516	83974999	+	2.74	7.13	4.38	2.08e-06	Intergenic	Intergenic	125940	NR_152790	102637349	Mm.402869	NR_152790	ENSMUSG00000111049	Gm34184	-	predicted gene, 34184	ncRNA
1111	chr9	25212861	25213404	+	3.1	7.83	4.73	2.09e-06	Intergenic	Intergenic	-38859	NM_001359736	235072	Mm.270259	NM_009859	ENSMUSG00000001833	2020-09-07	Cdc10|E430034N22	septin 7	protein-coding
1112	chr2	166485240	166486246	+	2.16	8.31	6.16	2.11e-06	Intergenic	Intergenic	38292	NR_015558	319684	Mm.399746	NR_015558		5031425F14Rik	-	RIKEN cDNA 5031425F14 gene	ncRNA
1113	chr15	55379997	55380447	+	2.61	7.64	5.03	2.12e-06	intron (NM_181277, intron 10 of 47)	intron (NM_181277, intron 10 of 47)	72472	NM_181277	12818	Mm.297859	NM_181277	ENSMUSG00000022371	Col14a1	5730412L22Rik|AW108078	collagen, type XIV, alpha 1	protein-coding
1114	chr2	27785825	27786343	+	2.35	7.67	5.32	2.12e-06	Intergenic	Intergenic	75501	NM_001290482	20181	Mm.24624	NM_011305	ENSMUSG00000015846	Rxra	9530071D11Rik|Nr2b1|RXRalpha1	retinoid X receptor alpha	protein-coding
1115	chr1	45290110	45290479	+	3.09	7.09	4	2.13e-06	Intergenic	Intergenic	-21244	NM_009930	12825	Mm.249555	NM_009930	ENSMUSG00000026043	Col3a1	AW550625|Col3a-1|Tsk-2|Tsk2	collagen, type III, alpha 1	protein-coding
1116	chr16	29818753	29819271	+	2.84	7.52	4.68	2.14e-06	Intergenic	MIRb|SINE|MIR	160112	NR_037689	328657	Mm.425982	NM_001033403		Gm1968	-	predicted gene 1968	ncRNA
1117	chr1	83279720	83280040	+	3.15	6.74	3.59	2.16e-06	intron (NM_001356547, intron 7 of 11)	intron (NM_001356547, intron 7 of 11)	120118	NM_027725	71227	Mm.256482	NM_027725	ENSMUSG00000053161	Daw1	4930563E19Rik|4933429D11Rik|Wdr69|b2b1116Clo|b2b1584Clo	dynein assembly factor with WDR repeat domains 1	protein-coding
1118	chr3	129311998	129312354	+	3.76	6.95	3.19	2.17e-06	intron (NM_007934, intron 4 of 19)	intron (NM_007934, intron 4 of 19)	20573	NM_007934	13809	Mm.1193	NM_007934	ENSMUSG00000028024	Enpep	6030431M22Rik|APA|Bp-1/6C3|Ly-51|Ly51	glutamyl aminopeptidase	protein-coding
1119	chr13	10696086	10696652	+	2.8	7.9	5.09	2.17e-06	Intergenic	Intergenic	-335566	NM_033269	12671	Mm.342315	NM_033269	ENSMUSG00000046159	Chrm3	Chrm-3|M3|M3R	cholinergic receptor, muscarinic 3, cardiac	protein-coding
1120	chr4	81728167	81728739	+	2.58	7.97	5.39	2.17e-06	Intergenic	Intergenic	-241440	NR_030570	100124446		NR_030570	ENSMUSG00000077941	Mir466h	Mirn466h	microRNA 466h	ncRNA
1121	chr4	105898175	105898582	+	3.42	6.71	3.29	2.2e-06	Intergenic	Intergenic	-342835	NR_151521	105244641	Mm.404914	NR_151521		Gm12724	-	predicted gene 12724	ncRNA
1122	chr19	55593546	55594345	+	3.11	8.39	5.28	2.21e-06	intron (NM_001360431, intron 8 of 8)	intron (NM_001360431, intron 8 of 8)	108259	NR_045318	77594	Mm.329924	NR_045318	ENSMUSG00000097632	4930552P12Rik	-	RIKEN cDNA 4930552P12 gene	ncRNA
1123	chr2	137591600	137592034	+	2.91	7.41	4.5	2.21e-06	Intergenic	Intergenic	-475297	NM_013822	16449	Mm.22398	NM_013822	ENSMUSG00000027276	Jag1	ABE2|Gsfabe2|Htu|Ozz|Ser-1	jagged 1	protein-coding
1124	chr3	157233518	157234075	+	2.65	7.54	4.89	2.22e-06	intron (NM_001039094, intron 6 of 6)	intron (NM_001039094, intron 6 of 6)	300294	NR_152231	381498	Mm.402095	NR_152231	ENSMUSG00000105834	4930592C13Rik	Gm1657|Gm43159	RIKEN cDNA 4930592C13 gene	ncRNA
1125	chr16	33586981	33588083	+	2.13	9.2	7.07	2.23e-06	intron (NM_001083902, intron 4 of 11)	intron (NM_001083902, intron 4 of 11)	68937	NM_001083902	171286	Mm.35253	NM_134251	ENSMUSG00000035506	Slc12a8	CCC9|E330020C02Rik	solute carrier family 12 (potassium/chloride transporters), member 8	protein-coding
1126	chr1	45894411	45894844	+	3.39	6.94	3.55	2.24e-06	Intergenic	Intergenic	30967	NM_016917	53945	Mm.28756	NM_016917	ENSMUSG00000025993	Slc40a1	Dusg|Fpn1|IREG1|MTP|MTP1|Ol5|Pcm|Slc11a3|Slc39a1	solute carrier family 40 (iron-regulated transporter), member 1	protein-coding
1127	chr9	118885776	118886188	+	2.75	7.43	4.67	2.24e-06	intron (NM_001113514, intron 12 of 13)	intron (NM_001113514, intron 12 of 13)	-40554	NM_133710	69274	Mm.439928	NM_133710	ENSMUSG00000047409	Ctdspl	2810418J22Rik|AI426263|HYA22|SCP3	CTD (carboxy-terminal domain, RNA polymerase II, polypeptide A) small phosphatase-like	protein-coding
1128	chr8	121181063	121181946	+	2.53	8.9	6.37	2.24e-06	Intergenic	Intergenic	53819	NM_008024	14241	Mm.5111	NM_008024	ENSMUSG00000097084	Foxl1	FREAC7|Fkh6|fkh-6	forkhead box L1	protein-coding
1129	chr1	87880821	87881462	+	2.33	8.29	5.96	2.24e-06	intron (NM_177646, intron 2 of 29)	intron (NM_177646, intron 2 of 29)	-26842	NR_136921	100503175	Mm.426422	NR_136921	ENSMUSG00000101942	Gm19582	-	predicted gene, 19582	ncRNA
1130	chr1	40107970	40108269	+	3.76	6.8	3.04	2.26e-06	intron (NM_010555, intron 3 of 8)	intron (NM_010555, intron 3 of 8)	22026	NM_001360800	16178	Mm.1349	NM_010555	ENSMUSG00000026073	Il1r2	CD121b|Il1r-2	interleukin 1 receptor, type II	protein-coding
1131	chr10	6760873	6761658	+	2.59	7.94	5.34	2.26e-06	intron (NM_001302796, intron 1 of 4)	intron (NM_001302796, intron 1 of 4)	2672	NM_001302795	18390	Mm.438000	NM_011013	ENSMUSG00000000766	Oprm1	M-OR-1|MOP-R|MOR-1|MOR-1O|Oprm|mor|muOR	opioid receptor, mu 1	protein-coding
1132	chr7	72541564	72542397	+	2.41	8.34	5.92	2.26e-06	Intergenic	Intergenic	-235385	NM_001024703	244049	Mm.217412	NM_001024703	ENSMUSG00000032776	Mctp2	Gm489	multiple C2 domains, transmembrane 2	protein-coding
1133	chr12	47219306	47219834	+	2.37	7.75	5.38	2.26e-06	Intergenic	Intergenic	-400795	NM_021361	664883	Mm.247195	NM_021361	ENSMUSG00000021047	Nova1	9430099M15Rik|G630039L02|Nova-1	neuro-oncological ventral antigen 1	protein-coding
1134	chr4	136116775	136117558	+	2.06	8.75	6.69	2.26e-06	Intergenic	Intergenic	-26656	NM_008321	15903	Mm.110	NM_008321	ENSMUSG00000007872	Id3	Hlh462|Idb3|bHLHb25	inhibitor of DNA binding 3	protein-coding
1135	chr11	86010515	86010849	+	3.98	6.51	2.53	2.27e-06	intron (NR_046030, intron 2 of 4)	RMER6A|LTR|ERVK	13668	NR_046030	629393	Mm.372867	NR_046030		Gm20759	-	predicted gene, 20759	ncRNA
1136	chr12	72031701	72032186	+	3	8.24	5.25	2.27e-06	Intergenic	Intergenic	39048	NM_181752	238252	Mm.390508	NM_181752	ENSMUSG00000043398	Gpr135	PAFR	G protein-coupled receptor 135	protein-coding
1137	chr1	80213296	80214259	+	-2.2	6.3	8.5	2.27e-06	5' UTR (NM_173425, exon 1 of 2)	5' UTR (NM_173425, exon 1 of 2)	167	NM_173425	241128	Mm.145511	NM_173425	ENSMUSG00000043230	Fam124b	A830043J08Rik	family with sequence similarity 124, member B	protein-coding
1138	chr10	111813854	111814180	+	3.68	6.98	3.31	2.28e-06	Intergenic	Intergenic	60359	NR_046029	629206	Mm.391444	NR_046029	ENSMUSG00000112533	Gm20758	-	predicted gene, 20758	ncRNA
1139	chr1	114781929	114782282	+	2.78	7.17	4.38	2.28e-06	Intergenic	MTE2b|LTR|ERVL-MaLR	-903032	NM_001077425	636808	Mm.101576	NM_001077425	ENSMUSG00000070695	Cntnap5a	Caspr5-1|EG636808	contactin associated protein-like 5A	protein-coding
1140	chr8	126885550	126887817	+	1.56	10.14	8.58	2.29e-06	Intergenic	LTR78|LTR|ERV1	37663	NR_151740	414091	Mm.240068	NM_001033546		A630001O12Rik	Gm45803	RIKEN cDNA A630001O12 gene	ncRNA
1141	chr1	165307310	165307749	+	2.66	7.5	4.84	2.3e-06	intron (NM_001081126, intron 3 of 6)	intron (NM_001081126, intron 3 of 6)	4906	NM_001310430	240888	Mm.329929	NM_001081126	ENSMUSG00000040836	Gpr161	Gm208|Gm208Gpr|vl	G protein-coupled receptor 161	protein-coding
1142	chr1	134518665	134519162	+	1.74	9.47	7.74	2.3e-06	Intergenic	Intergenic	24253	NM_145510	98710	Mm.198119	NM_145510	ENSMUSG00000042229	Rabif	AI842864|AW549708|E130318E12Rik|MSS4|RASGFR3	RAB interacting factor	protein-coding
1143	chr1	59434070	59434455	+	3.02	7.68	4.66	2.32e-06	Intergenic	Intergenic	-47885	NM_008057	14369	Mm.297906	NM_008057	ENSMUSG00000041075	Fzd7	Fz7	frizzled class receptor 7	protein-coding
1144	chr18	39581969	39582346	+	2.97	7.38	4.4	2.32e-06	Intergenic	Intergenic	-94912	NM_008173	14815	Mm.129481	NM_008173	ENSMUSG00000024431	Nr3c1	GR|Grl-1|Grl1	nuclear receptor subfamily 3, group C, member 1	protein-coding
1145	chr4	138522190	138523022	+	2.7	8.51	5.81	2.33e-06	Intergenic	Intergenic	67458	NM_025451	66259	Mm.41603	NM_025451	ENSMUSG00000046447	Camk2n1	1810006K23Rik|AI848599|AI891706	calcium/calmodulin-dependent protein kinase II inhibitor 1	protein-coding
1146	chr8	120034414	120034952	+	2.96	8.35	5.39	2.35e-06	intron (NM_001310635, intron 13 of 14)	intron (NM_001310635, intron 13 of 14)	42245	NM_030209	78892	Mm.264680	NM_030209	ENSMUSG00000031825	Crispld2	1810049K24Rik|Lcrisp2|Lgl1|coffeecrisp	cysteine-rich secretory protein LCCL domain containing 2	protein-coding
1147	chr16	84771429	84771956	+	2.46	8.08	5.62	2.35e-06	Intergenic	Intergenic	-2431	NM_023844	67374	Mm.41758	NM_023844	ENSMUSG00000053062	Jam2	1110002N23Rik|2410030G21Rik|2410167M24Rik|JAM-2|JAM-B|Jcam2|VE-JAM	junction adhesion molecule 2	protein-coding
1148	chr10	42961810	42963226	+	2.35	8.6	6.24	2.35e-06	Intergenic	Intergenic	28644	NR_153349	327749	Mm.428887	NR_153349		Gm5079	C230040G06	predicted gene 5079	ncRNA
1149	chr17	47293940	47294595	+	2.19	8.42	6.23	2.35e-06	intron (NM_001097623, intron 5 of 19)	intron (NM_001097623, intron 5 of 19)	64037	NM_172622	224829	Mm.260989	NM_172622		Trerf1	9430096I18Rik|AI429294|B830015H24|RAPA|Trep-132|Trep132	transcriptional regulating factor 1	protein-coding
1150	chr17	83916113	83917553	+	1.91	9.16	7.25	2.36e-06	Intergenic	Intergenic	-62415	NR_155490	320021	Mm.379475	NR_155490		C430042M11Rik	-	RIKEN cDNA C430042M11 gene	ncRNA
1151	chr1	153126310	153127561	+	1.75	10.11	8.36	2.36e-06	intron (NM_008485, intron 22 of 23)	intron (NM_008485, intron 22 of 23)	59512	NM_008485	16782	Mm.329272	NM_008485	ENSMUSG00000026479	Lamc2	AA589349	laminin, gamma 2	protein-coding
1152	chr18	55095813	55096590	+	-2.22	5.91	8.13	2.36e-06	Intergenic	L4_A_Mam|LINE|RTE-X	-103610	NM_001360787	269023	Mm.192984	NM_175751	ENSMUSG00000052713	Zfp608	4932417D18Rik|D430007A19Rik|Znf608	zinc finger protein 608	protein-coding
1153	chr11	109922167	109922779	+	3.32	7.89	4.57	2.37e-06	Intergenic	Intergenic	73343	NM_013851	27404	Mm.341004	NM_013851	ENSMUSG00000020620	Abca8b	Abca8	ATP-binding cassette, sub-family A (ABC1), member 8b	protein-coding
1154	chr17	16339755	16340394	+	2.66	7.77	5.11	2.37e-06	Intergenic	Intergenic	-513488	NM_178615	68799	Mm.293466	NM_178615	ENSMUSG00000048027	Rgmb	1110059F19Rik|DRAGON	repulsive guidance molecule family member B	protein-coding
1155	chr1	79917532	79918122	+	2.36	7.91	5.55	2.37e-06	Intergenic	Intergenic	-59162	NM_009255	20720	Mm.3093	NM_009255	ENSMUSG00000026249	Serpine2	B230326M24Rik|PAI-1|PI-7|PI7|PN-1|Spi4	serine (or cysteine) peptidase inhibitor, clade E, member 2	protein-coding
1156	chr13	63750012	63750464	+	2.22	8.15	5.93	2.37e-06	Intergenic	Intergenic	-15940	NR_126476	75522	Mm.54259	NR_126476	ENSMUSG00000113825	1700024I08Rik	-	RIKEN cDNA 1700024I08 gene	ncRNA
1157	chr11	57201155	57201919	+	2.82	8.07	5.25	2.38e-06	intron (NM_008165, intron 5 of 15)	MTE2a|LTR|ERVL-MaLR	188491	NM_001252403	14799	Mm.4920	NM_008165	ENSMUSG00000020524	Gria1	2900051M01Rik|Glr-1|Glr1|GluA1|GluR-A|GluRA|Glur-1|Glur1|HIPA1|gluR-K1	glutamate receptor, ionotropic, AMPA1 (alpha 1)	protein-coding
1158	chr3	89633824	89634318	+	2.68	8.15	5.48	2.38e-06	intron (NM_080466, intron 3 of 7)	intron (NM_080466, intron 3 of 7)	-80951	NM_001038587	56417	Mm.316628	NM_019655	ENSMUSG00000027951	Adar	AV242451|Adar1|Adar1p110|Adar1p150|DRADA|mZaADAR	adenosine deaminase, RNA-specific	protein-coding
1159	chr5	21532974	21533425	+	2.46	7.81	5.35	2.4e-06	intron (NM_001199632, intron 12 of 20)	L2a|LINE|L2	-10328	NM_028977	74511	Mm.439963	NM_028977	ENSMUSG00000039883	Lrrc17	37kDa|4833425M04Rik|6130400C22Rik|P37nb	leucine rich repeat containing 17	protein-coding
1160	chr4	153758426	153759135	+	2.27	7.72	5.45	2.4e-06	Intergenic	Intergenic	191696	NR_040670	407793	Mm.260950	NR_040670		BC039966	-	cDNA sequence BC039966	ncRNA
1161	chr4	86486450	86487222	+	-2.22	5.93	8.15	2.4e-06	intron (NM_001081096, intron 2 of 3)	intron (NM_001081096, intron 2 of 3)	71467	NM_001081096	75811	Mm.56451	NM_001081096	ENSMUSG00000028492	Saxo1	4930500O09Rik|Fam154a	stabilizer of axonemal microtubules 1	protein-coding
1162	chr11	82062252	82062610	+	3.03	7.25	4.23	2.42e-06	3' UTR (NM_011330, exon 3 of 3)	3' UTR (NM_011330, exon 3 of 3)	4599	NM_011330	20292	Mm.4686	NM_011330	ENSMUSG00000020676	Ccl11	Scya11|eotaxin	chemokine (C-C motif) ligand 11	protein-coding
1163	chr10	25999150	25999919	+	2.81	7.79	4.98	2.43e-06	intron (NM_029881, intron 1 of 1)	intron (NM_029881, intron 1 of 1)	-78721	NR_028030	100040851	Mm.478630	NR_028030	ENSMUSG00000039098	Gm9767	-	predicted gene 9767	ncRNA
1164	chr12	70050373	70051234	+	2.44	8.35	5.92	2.43e-06	intron (NM_001081453, intron 11 of 28)	intron (NM_001081453, intron 11 of 28)	52051	NM_001081453	18080	Mm.244047	NM_008697	ENSMUSG00000021068	Nin	3110068G20Rik|AI385615|AU024711|mKIAA1565	ninein	protein-coding
1165	chr1	90718871	90719154	+	4.26	6.49	2.22	2.44e-06	Intergenic	Intergenic	115587	NM_133805	108679	Mm.119177	NM_133805	ENSMUSG00000034432	Cops8	9430009J09Rik|AA408242|Csn8|Sgn8	COP9 signalosome subunit 8	protein-coding
1166	chr17	84109804	84110673	+	2.36	8.73	6.37	2.49e-06	Intergenic	Intergenic	31578	NR_045458	74473	Mm.399575	NR_045458		4933433H22Rik	-	RIKEN cDNA 4933433H22 gene	ncRNA
1167	chr2	24502870	24503547	+	-2.2	5.57	7.77	2.51e-06	Intergenic	Intergenic	-27609	NM_011040	18510	Mm.2533	NM_011040	ENSMUSG00000026976	Pax8	Pax-8	paired box 8	protein-coding
1168	chr16	44695673	44696618	+	2.41	8.69	6.28	2.53e-06	Intergenic	Intergenic	-28156	NM_145972	212547	Mm.310573	NM_145972	ENSMUSG00000036208	Nepro	-	nucleolus and neural progenitor protein	protein-coding
1169	chr4	64282465	64282839	+	3.18	7.16	3.98	2.55e-06	Intergenic	Intergenic	-6049	NR_151546	102633436	Mm.411637	NR_151546		Gm11217	-	predicted gene 11217	ncRNA
1170	chr11	101244926	101245569	+	2.33	8.7	6.38	2.55e-06	Intergenic	Intergenic	-1087	NM_019444	54409	Mm.260698	NM_019444	ENSMUSG00000001240	Ramp2	-	receptor (calcitonin) activity modifying protein 2	protein-coding
1171	chr10	122449995	122450493	+	3.27	7.42	4.16	2.57e-06	intron (NM_016847, intron 1 of 1)	intron (NM_016847, intron 1 of 1)	1745	NM_016847	54140	Mm.4351	NM_016847	ENSMUSG00000020123	Avpr1a	AVPR|Avpr1|V1a|V1aR	arginine vasopressin receptor 1A	protein-coding
1172	chr14	76681472	76682390	+	2.32	8.79	6.48	2.57e-06	intron (NR_015485, intron 4 of 4)	(TC)n|Simple_repeat|Simple_repeat	4363	NR_015485	73272	Mm.116804	NR_015485	ENSMUSG00000101009	1700108F19Rik	1700020I02Rik|BB065030	RIKEN cDNA 1700108F19 gene	ncRNA
1173	chr19	44474142	44475635	+	1.81	9.11	7.3	2.57e-06	Intergenic	Intergenic	-18584	NM_011720	22423	Mm.88365	NM_011720	ENSMUSG00000036961	Wnt8b	-	wingless-type MMTV integration site family, member 8B	protein-coding
1174	chr16	16907432	16908341	+	-2.18	7	9.17	2.57e-06	intron (NM_176833, intron 2 of 7)	intron (NM_176833, intron 2 of 7)	11417	NM_176833	68606	Mm.230296	NM_176833	ENSMUSG00000026181	Ppm1f	1110021B16Rik|4933427B07Rik|CaMKPase|Popx2|mKIAA0015	protein phosphatase 1F (PP2C domain containing)	protein-coding
1175	chr3	115708772	115709880	+	-2.28	7.06	9.34	2.57e-06	Intergenic	Intergenic	5729	NM_007901	13609	Mm.982	NM_007901	ENSMUSG00000045092	S1pr1	AI849002|Edg1|Lpb1|S1p|S1p1	sphingosine-1-phosphate receptor 1	protein-coding
1176	chr7	72165735	72166531	+	-2.35	6.05	8.4	2.57e-06	intron (NM_001024703, intron 14 of 22)	intron (NM_001024703, intron 14 of 22)	140462	NM_001024703	244049	Mm.217412	NM_001024703	ENSMUSG00000032776	Mctp2	Gm489	multiple C2 domains, transmembrane 2	protein-coding
1177	chr10	78096164	78097016	+	2.62	8.28	5.66	2.6e-06	Intergenic	Intergenic	27222	NM_015790	50723	Mm.17819	NM_015790	ENSMUSG00000000732	Icosl	AU044799|B7-H2|B7RP-1|B7h|BG071784|GI50|GL50|GL50-B|ICOS-L|Icoslg|LICOS|Ly115l|mKIAA0653	icos ligand	protein-coding
1178	chr2	93874074	93874495	+	3.18	7.45	4.27	2.61e-06	Intergenic	Intergenic	-5127	NM_001033452	381411	Mm.9889	NM_001033452	ENSMUSG00000075023	Accsl	Gm1967	1-aminocyclopropane-1-carboxylate synthase (non-functional)-like	protein-coding
1179	chr6	140051471	140051976	+	2.85	7.64	4.79	2.62e-06	Intergenic	Intergenic	10198	NM_007605	12344	Mm.12817	NM_007605	ENSMUSG00000041791	Capza3	510-4|Cappa3|Gsg3|Tex8|repro32	capping protein (actin filament) muscle Z-line, alpha 3	protein-coding
1180	chr3	41284852	41285658	+	2.2	8.71	6.51	2.64e-06	Intergenic	Intergenic	-202209	NM_027558	70804	Mm.40321	NM_027558	ENSMUSG00000049940	Pgrmc2	4631434O19Rik|5730409G06Rik|DG6|PMBP	progesterone receptor membrane component 2	protein-coding
1181	chr6	48546910	48547278	+	2.99	7.8	4.81	2.65e-06	Intergenic	Intergenic	-7705	NM_177736	243371	Mm.290764	NM_177736	ENSMUSG00000073096	Lrrc61	BC027309	leucine rich repeat containing 61	protein-coding
1182	chr2	38111453	38112368	+	2.6	7.8	5.2	2.65e-06	intron (NM_146122, intron 5 of 21)	intron (NM_146122, intron 5 of 21)	175474	NM_146122	227801	Mm.314245	NM_146122	ENSMUSG00000035392	Dennd1a	6030446I19Rik|connecdenn	DENN/MADD domain containing 1A	protein-coding
1183	chr18	61044606	61045520	+	2.42	8.79	6.37	2.65e-06	promoter-TSS (NM_001146268)	promoter-TSS (NM_001146268)	-87	NM_001146268	18596	Mm.4146	NM_008809	ENSMUSG00000024620	Pdgfrb	AI528809|CD140b|PDGFR-1|Pdgfr	platelet derived growth factor receptor, beta polypeptide	protein-coding
1184	chr13	103354656	103355139	+	2.81	7.52	4.71	2.67e-06	Intergenic	MER117|DNA|hAT-Charlie	-20405	NM_175171	328329	Mm.202606	NM_175171	ENSMUSG00000034751	Mast4	4930420O11Rik|AI642422|mKIAA0303	microtubule associated serine/threonine kinase family member 4	protein-coding
1185	chr6	35349695	35350469	+	1.9	8.84	6.94	2.67e-06	Intergenic	Intergenic	19236	NR_040526	73409	Mm.69443	NR_040526	ENSMUSG00000107341	1700065J11Rik	-	RIKEN cDNA 1700065J11 gene	ncRNA
1186	chr4	32520499	32521315	+	2.68	8.13	5.45	2.71e-06	intron (NM_001109661, intron 2 of 4)	intron (NM_001109661, intron 2 of 4)	50755	NR_026843	414068	Mm.389550	NR_026843	ENSMUSG00000086150	Bach2os	-	BTB and CNC homology 2, opposite strand	ncRNA
1187	chr11	103371032	103371679	+	-2.34	5.65	7.99	2.71e-06	intron (NM_183034, intron 8 of 11)	intron (NM_183034, intron 8 of 11)	-7663	NM_183288	544817	Mm.259113	NM_133715	ENSMUSG00000034255	Arhgap27	2310069I04Rik|5730442P18Rik|Gm21552|Sh3d20	Rho GTPase activating protein 27	protein-coding
1188	chr1	151638427	151638735	+	3.56	6.88	3.32	2.72e-06	intron (NM_022018, intron 2 of 13)	intron (NM_022018, intron 2 of 13)	67208	NM_022018	63913	Mm.157700	NM_022018	ENSMUSG00000026483	Fam129a	AI256368|AU019833|Niban	family with sequence similarity 129, member A	protein-coding
1189	chr11	109792507	109793058	+	2.89	7.27	4.38	2.72e-06	intron (NM_027038, intron 4 of 4)	intron (NM_027038, intron 4 of 4)	35264	NM_027038	69324	Mm.31700	NM_027038	ENSMUSG00000020617	1700012B07Rik	1700069D21Rik	RIKEN cDNA 1700012B07 gene	protein-coding
1190	chr18	9732127	9732414	+	3.15	7.1	3.95	2.73e-06	intron (NM_130449, intron 2 of 9)	intron (NM_130449, intron 2 of 9)	24622	NM_130449	140792	Mm.218571	NM_130449	ENSMUSG00000036103	Colec12	CL-P1|SRCL|Scara4	collectin sub-family member 12	protein-coding
1191	chr14	47756338	47757065	+	2.56	7.91	5.35	2.73e-06	Intergenic	Intergenic	92945	NM_008477	16709	Mm.3110	NM_008477	ENSMUSG00000021843	Ktn1	-	kinectin 1	protein-coding
1192	chr9	65569352	65570151	+	2.66	8.42	5.75	2.74e-06	intron (NM_153119, intron 2 of 5)	intron (NM_153119, intron 2 of 5)	10336	NM_153119	102595	Mm.247303	NM_153119	ENSMUSG00000050721	Plekho2	AI840980|Plekhq1	pleckstrin homology domain containing, family O member 2	protein-coding
1193	chr2	27896955	27897713	+	2.48	8.31	5.83	2.75e-06	intron (NM_015734, intron 1 of 65)	intron (NM_015734, intron 1 of 65)	10909	NM_015734	12831	Mm.7281	NM_015734	ENSMUSG00000026837	Col5a1	AI413331	collagen, type V, alpha 1	protein-coding
1194	chr19	41007277	41007760	+	2.68	8.17	5.49	2.76e-06	intron (NR_155302, intron 1 of 2)	intron (NR_155302, intron 1 of 2)	4160	NR_155302	100861913	Mm.35204	NR_155302		C330026H20Rik	-	RIKEN cDNA C330026H20 gene	ncRNA
1195	chr10	21783435	21783906	+	-2.57	5.4	7.97	2.81e-06	Intergenic	Intergenic	92825	NR_045843	432436	Mm.244553	NM_001004162	ENSMUSG00000056716	Gm5420	EG432436	predicted gene 5420	ncRNA
1196	chr7	73243717	73244441	+	2.66	8.44	5.78	2.82e-06	Intergenic	Intergenic	-66301	NR_105062	100505025	Mm.387218	NR_105062	ENSMUSG00000108530	4930429H19Rik	-	RIKEN cDNA 4930429H19 gene	ncRNA
1197	chr11	112620843	112621981	+	2.09	8.42	6.33	2.83e-06	Intergenic	Intergenic	89944	NR_024085	217294	Mm.297761	NM_146031	ENSMUSG00000041674	BC006965	-	cDNA sequence BC006965	ncRNA
1198	chr13	49546506	49546971	+	2.89	7.65	4.76	2.84e-06	intron (NM_001172481, intron 1 of 7)	intron (NM_001172481, intron 1 of 7)	2295	NM_001172481	66695	Mm.383216	NM_025711	ENSMUSG00000021388	Aspn	4631401G09Rik|AA986886|Plap1|Slrr1c	asporin	protein-coding
1199	chr18	56776510	56776936	+	2.85	7.85	5	2.84e-06	intron (NM_177115, intron 4 of 4)	L2c|LINE|L2	68910	NM_010721	16906	Mm.4105	NM_010721	ENSMUSG00000024590	Lmnb1	-	lamin B1	protein-coding
1200	chr1	73516406	73516781	+	2.67	7.97	5.3	2.84e-06	Intergenic	Intergenic	-109024	NR_003202	723792	Mm.385493	NR_003202		Pinc	-	pregnancy induced noncoding RNA	ncRNA
1201	chr9	61558397	61559361	+	2.31	8.53	6.22	2.84e-06	Intergenic	Intergenic	186513	NM_001083927	21887	Mm.24255	NM_009389	ENSMUSG00000032280	Tle3	2610103N05Rik|ESG|Grg3a|Grg3b|mKIAA1547	transducin-like enhancer of split 3	protein-coding
1202	chr5	112348330	112348697	+	3.44	7.15	3.71	2.85e-06	intron (NM_001359853, intron 3 of 13)	RMER6A|LTR|ERVK	5418	NM_001359853	192232	Mm.238043	NM_138646	ENSMUSG00000042328	Hps4	2010205O06Rik|AU040608|BLOC-3|C130020P05Rik|le|mKIAA1667	HPS4, biogenesis of lysosomal organelles complex 3 subunit 2	protein-coding
1203	chr3	54477970	54478468	+	3.02	7.56	4.54	2.85e-06	Intergenic	Intergenic	117112	NM_001313899	50706	Mm.236067	NM_015784	ENSMUSG00000027750	Postn	A630052E07Rik|AI747096|OSF-2|Osf2|PLF|PN	periostin, osteoblast specific factor	protein-coding
1204	chr8	46868203	46869072	+	2.15	9.17	7.02	2.85e-06	Intergenic	Intergenic	-118250	NM_177304	320981	Mm.211429	NM_177304	ENSMUSG00000038173	Enpp6	4833421B01Rik|B830047L21Rik|D8Ertd514e|E-NPP 6|GPC-Cpde|Npp6	ectonucleotide pyrophosphatase/phosphodiesterase 6	protein-coding
1205	chrX	139134049	139134340	+	3.12	6.88	3.76	2.88e-06	Intergenic	Intergenic	-45034	NM_001357856	71248	Mm.158634	NM_001357856	ENSMUSG00000042525	4933428M09Rik	-	RIKEN cDNA 4933428M09 gene	protein-coding
1206	chr1	120253517	120254532	+	2.04	9.19	7.15	2.88e-06	intron (NM_001085409, intron 2 of 5)	intron (NM_001085409, intron 2 of 5)	11256	NM_133186	68428	Mm.181033	NM_133186	ENSMUSG00000026389	Steap3	1010001D01Rik|Tsap6|pHyde	STEAP family member 3	protein-coding
1207	chr15	88921853	88922458	+	2.31	8.02	5.71	2.89e-06	intron (NM_001357736, intron 8 of 11)	L1M5|LINE|L1	32263	NM_001357736	239591	Mm.86807	NM_172818	ENSMUSG00000022388	Ttll8	1700019P01Rik|4933401B17	tubulin tyrosine ligase-like family, member 8	protein-coding
1208	chr4	150707028	150708071	+	1.83	9.29	7.46	2.9e-06	Intergenic	Intergenic	-55375	NM_001355737	242773	Mm.29280	NM_173774	ENSMUSG00000039838	Slc45a1	C230078B22|Dnb5	solute carrier family 45, member 1	protein-coding
1209	chr7	36667696	36668105	+	3.4	7.42	4.02	2.92e-06	Intergenic	Intergenic	-30218	NM_172298	243931	Mm.44141	NM_172298	ENSMUSG00000021217	Tshz3	A630038G13Rik|Tsh3|Zfp537|mKIAA1474|teashirt3	teashirt zinc finger family member 3	protein-coding
1210	chr5	74971491	74971771	+	3.28	6.62	3.34	2.92e-06	Intergenic	Intergenic	22437	NR_045866	619945	Mm.359372	NM_001037908	ENSMUSG00000072874	Gm6116	EG619945	predicted gene 6116	ncRNA
1211	chr3	49928921	49929734	+	2.48	7.87	5.4	2.92e-06	Intergenic	Intergenic	-172011	NM_130448	73173	Mm.87246	NM_130448	ENSMUSG00000037892	Pcdh18	3110038E07Rik|BB095589|PCDH68L	protocadherin 18	protein-coding
1212	chr15	5343852	5344192	+	2.78	7.47	4.7	2.93e-06	Intergenic	Intergenic	-99835	NM_001136079	19219	Mm.18509	NM_008965	ENSMUSG00000039942	Ptger4	EP4|Ptgerep4	prostaglandin E receptor 4 (subtype EP4)	protein-coding
1213	chr5	33245506	33246335	+	2.01	8.71	6.69	2.95e-06	Intergenic	Intergenic	-27682	NM_133903	100689	Mm.34694	NM_133903	ENSMUSG00000037379	Spon2	2310045I24Rik|AI504350|M-spondin|Mindin|Mspondin	spondin 2, extracellular matrix protein	protein-coding
1214	chr13	41994125	41994551	+	3.08	7.36	4.27	2.96e-06	Intergenic	Intergenic	-57683	NM_007772	110521	Mm.4808	NM_007772	ENSMUSG00000021366	Hivep1	Cryabp1	human immunodeficiency virus type I enhancer binding protein 1	protein-coding
1215	chr1	172133579	172134030	+	3.07	7.18	4.11	2.96e-06	intron (NM_001356514, intron 6 of 6)	RMER4A|LTR|ERVK	7049	NM_001159525	19298	Mm.247764	NM_023041	ENSMUSG00000003464	Pex19	Pxf	peroxisomal biogenesis factor 19	protein-coding
1216	chr1	89544113	89544469	+	2.81	7.56	4.75	2.98e-06	intron (NM_001037136, intron 1 of 16)	intron (NM_001037136, intron 1 of 16)	89480	NM_001037136	347722	Mm.291135	NM_178119	ENSMUSG00000055013	Agap1	Centg2|Ggap1|R75364|mKIAA1099	ArfGAP with GTPase domain, ankyrin repeat and PH domain 1	protein-coding
1217	chr18	4513591	4515746	+	-2.07	7.44	9.52	3.01e-06	Intergenic	Intergenic	-120261	NM_001081963	240185	Mm.33179	NM_001081963	ENSMUSG00000033960	Jcad	1110056P05Rik|9430020K01Rik|Gm328|mKIAA1462	junctional cadherin 5 associated	protein-coding
1218	chr15	34407943	34408349	+	2.96	7.52	4.55	3.02e-06	intron (NM_001358780, intron 8 of 18)	intron (NM_001358780, intron 8 of 18)	35079	NM_009083	19946	Mm.358632	NM_009083	ENSMUSG00000058600	Rpl30	-	ribosomal protein L30	protein-coding
1219	chr13	23940240	23940842	+	2.5	7.6	5.1	3.02e-06	Intergenic	RMER6A|LTR|ERVK	6079	NM_175658	319163	Mm.377876	NM_175658	ENSMUSG00000060081	Hist1h2aa	Th2a	histone cluster 1, H2aa	protein-coding
1220	chr2	159054411	159054942	+	2.32	7.61	5.29	3.02e-06	Intergenic	Intergenic	259869	NM_145742	71715	Mm.315652	NM_145742	ENSMUSG00000027655	Dhx35	1200009D07Rik|Ddx35	DEAH (Asp-Glu-Ala-His) box polypeptide 35	protein-coding
1221	chr1	174051524	174051854	+	3.49	6.5	3.01	3.04e-06	TTS (NM_146716)	TTS (NM_146716)	1314	NM_146716	258711	Mm.377648	NM_146716	ENSMUSG00000047048	Olfr432	MOR123-2	olfactory receptor 432	protein-coding
1222	chr10	19521042	19521448	+	2.81	7.1	4.29	3.04e-06	Intergenic	Intergenic	26602	NR_152785	102635880	Mm.331974	NR_152784	ENSMUSG00000110902	Gm33104	-	predicted gene, 33104	ncRNA
1223	chr17	34692542	34693990	+	2.27	9.15	6.88	3.04e-06	intron (NM_031176, intron 12 of 32)	intron (NM_031176, intron 12 of 32)	22731	NM_031176	81877	Mm.290527	NM_031176	ENSMUSG00000033327	Tnxb	Tn-mhc|Tnx	tenascin XB	protein-coding
1224	chr2	92012643	92013244	+	2.09	8.1	6.01	3.04e-06	intron (NM_011957, intron 1 of 11)	intron (NM_011957, intron 1 of 11)	11227	NM_011957	26427	Mm.10353	NM_011957	ENSMUSG00000027230	Creb3l1	Oasis	cAMP responsive element binding protein 3-like 1	protein-coding
1225	chr1	173550454	173550963	+	2.49	7.38	4.88	3.05e-06	Intergenic	Intergenic	-14751	NM_001024721	545384	Mm.371698	NM_001024721	ENSMUSG00000070501	Ifi214	Pyhin-B|p214	interferon activated gene 214	protein-coding
1226	chr7	46719609	46720126	+	2.87	7.32	4.46	3.09e-06	Intergenic	Intergenic	-4191	NM_011315	20210	Mm.14277	NM_011315	ENSMUSG00000040026	Saa3	AV098916|Saa-3|l7R3	serum amyloid A 3	protein-coding
1227	chr7	132435303	132435829	+	-2.76	4.4	7.15	3.09e-06	Intergenic	Intergenic	-118338	NM_029935	77590	Mm.213582	NM_029935	ENSMUSG00000030930	Chst15	4631426J05Rik|BRAG|GalNAc4S-6ST|GalNAcS-6ST|MAd5|mKIAA0598	carbohydrate (N-acetylgalactosamine 4-sulfate 6-O) sulfotransferase 15	protein-coding
1228	chr19	53130457	53131146	+	2.84	7.66	4.82	3.11e-06	Intergenic	(TCCC)n|Simple_repeat|Simple_repeat	-9642	NM_001164101	27360	Mm.426080	NM_013758	ENSMUSG00000025026	Add3	AI463285|R75380	adducin 3 (gamma)	protein-coding
1229	chr3	37810688	37811174	+	2.59	7.86	5.27	3.11e-06	Intergenic	Lx7|LINE|L1	-86571	NM_198657	381438	Mm.490549	NM_198657	ENSMUSG00000058174	Gm5148	EG381438	predicted gene 5148	protein-coding
1230	chr9	60865756	60866595	+	-2.26	5.61	7.87	3.11e-06	intron (NM_001357408, intron 13 of 19)	intron (NM_001357408, intron 13 of 19)	71733	NM_001357407	72565	Mm.68819	NM_028283	ENSMUSG00000034485	Uaca	2700059D02Rik|nucling	uveal autoantigen with coiled-coil domains and ankyrin repeats	protein-coding
1231	chr18	74917616	74918103	+	2.75	7.6	4.84	3.12e-06	Intergenic	Intergenic	43404	NM_010720	16891	Mm.299647	NM_010720	ENSMUSG00000053846	Lipg	3110013K01Rik|EL|lipase|mEDL	lipase, endothelial	protein-coding
1232	chr14	31550239	31550632	+	2.92	7.25	4.33	3.13e-06	intron (NM_009937, intron 3 of 16)	intron (NM_009937, intron 3 of 16)	26948	NM_009937	382864	Mm.239821	NM_009937	ENSMUSG00000057606	Colq	A130034K24Rik	collagen-like tail subunit (single strand of homotrimer) of asymmetric acetylcholinesterase	protein-coding
1233	chr9	68131262	68131652	+	2.51	7.83	5.32	3.16e-06	Intergenic	Intergenic	-105743	NR_045745	434412	Mm.490707	NR_045745	ENSMUSG00000111841	Gm20745	-	predicted gene, 20745	ncRNA
1234	chr1	148707706	148708050	+	3.15	7.25	4.1	3.17e-06	Intergenic	Intergenic	1214561	NM_001305632	18783	Mm.4186	NM_008869	ENSMUSG00000056220	Pla2g4a	Pla2g4|cPLA2|cPLA2-alpha|cPLA2alpha	phospholipase A2, group IVA (cytosolic, calcium-dependent)	protein-coding
1235	chr10	119867732	119868110	+	2.92	7.46	4.54	3.17e-06	intron (NM_001358811, intron 1 of 23)	intron (NM_001358811, intron 1 of 23)	-15531	NR_131760	78105	Mm.399086	NR_131760	ENSMUSG00000085418	Grip1os1	4930404E01Rik|4930483C13Rik	glutamate receptor interacting protein 1, opposite strand 1	ncRNA
1236	chr17	43754671	43754974	+	2.85	6.88	4.03	3.17e-06	Intergenic	Intergenic	-46530	NM_001357742	53901	Mm.251242	NM_030598	ENSMUSG00000039601	Rcan2	Csp2|Dscr1l1|MCIP2|ZAKI-4	regulator of calcineurin 2	protein-coding
1237	chr13	113489923	113490789	+	2.59	7.76	5.17	3.17e-06	intron (NR_045501, intron 1 of 6)	intron (NR_045501, intron 1 of 6)	12488	NR_045501	70917	Mm.491036	NR_045501	ENSMUSG00000114790	4921509O07Rik	-	RIKEN cDNA 4921509O07 gene	ncRNA
1238	chr16	24136010	24136809	+	2.5	7.62	5.12	3.17e-06	Intergenic	B1F1|SINE|Alu	-53719	NR_155457	108168278	Mm.417246	NR_155457		Gm46545	-	predicted gene, 46545	ncRNA
1239	chr6	51163264	51163690	+	2.5	7.32	4.83	3.17e-06	Intergenic	Intergenic	106433	NR_029719	387166		NR_029719	ENSMUSG00000065505	Mir148a	Mirn148|Mirn148a|mir-148a	microRNA 148a	ncRNA
1240	chr2	32120034	32120772	+	2.36	8.1	5.73	3.17e-06	Intergenic	(CACAC)n|Simple_repeat|Simple_repeat	24875	NM_145521	227721	Mm.257236	NM_145521	ENSMUSG00000051373	Plpp7	D830019K17Rik|NET39|Ppapdc3	phospholipid phosphatase 7 (inactive)	protein-coding
1241	chr1	4571320	4572374	+	-1.56	7.87	9.43	3.17e-06	Intergenic	CpG	-74493	NM_001289467	20671	Mm.279103	NM_011441	ENSMUSG00000025902	Sox17	-	SRY (sex determining region Y)-box 17	protein-coding
1242	chr1	61309413	61309969	+	-2.33	5.59	7.92	3.22e-06	Intergenic	Intergenic	-68741	NR_040483	77341	Mm.402964	NR_040483	ENSMUSG00000085447	9530026F06Rik	-	RIKEN cDNA 9530026F06 gene	ncRNA
1243	chr2	127736465	127737166	+	-2.09	6.29	8.38	3.29e-06	Intergenic	Intergenic	-6918	NM_145532	228576	Mm.133036	NM_145532	ENSMUSG00000027377	Mall	BC012256|BENE	mal, T cell differentiation protein-like	protein-coding
1244	chr1	45276019	45276451	+	2.89	7.24	4.35	3.3e-06	Intergenic	Intergenic	-35303	NM_009930	12825	Mm.249555	NM_009930	ENSMUSG00000026043	Col3a1	AW550625|Col3a-1|Tsk-2|Tsk2	collagen, type III, alpha 1	protein-coding
1245	chr10	86281151	86281667	+	2.55	7.88	5.32	3.3e-06	intron (NM_013722, intron 6 of 13)	intron (NM_013722, intron 6 of 13)	-19003	NM_011595	21859	Mm.4871	NM_011595	ENSMUSG00000020044	Timp3	Timp-3	tissue inhibitor of metalloproteinase 3	protein-coding
1246	chr6	89034425	89035434	+	2.32	8.22	5.91	3.3e-06	Intergenic	Intergenic	-61181	NR_134978	232217	Mm.281744	NM_175017	ENSMUSG00000055403	4933427D06Rik	-	RIKEN cDNA 4933427D06 gene	ncRNA
1247	chr1	91856745	91858722	+	1.85	9.45	7.6	3.3e-06	Intergenic	Intergenic	56272	NM_007855	13345	Mm.9474	NM_007855	ENSMUSG00000007805	Twist2	Dermo1|bHLHa39	twist basic helix-loop-helix transcription factor 2	protein-coding
1248	chr5	131367534	131367894	+	3.29	6.6	3.31	3.31e-06	Intergenic	Intergenic	47004	NR_152164	545809	Mm.357553	NR_152164	ENSMUSG00000105387	Gm29681	Gm42590	predicted gene, 29681	ncRNA
1249	chr9	102972279	102972994	+	2.36	7.99	5.63	3.33e-06	Intergenic	Charlie13a|DNA|hAT-Charlie	-35853	NM_033314	24059	Mm.207106	NM_033314	ENSMUSG00000032548	Slco2a1	2310021C19Rik|Pgt|Slc21a2|mPgt	solute carrier organic anion transporter family, member 2a1	protein-coding
1250	chr18	44472444	44473492	+	1.8	9.2	7.4	3.33e-06	intron (NM_001085373, intron 11 of 18)	intron (NM_001085373, intron 11 of 18)	92468	NM_027490	70640	Mm.87629	NM_027490	ENSMUSG00000024472	Dcp2	2410015D23Rik|5730537H01Rik|AL118268	decapping mRNA 2	protein-coding
1251	chr16	87128135	87128903	+	-2.2	6.64	8.84	3.33e-06	promoter-TSS (NR_153792)	promoter-TSS (NR_153792)	-80	NR_153792	102635567	Mm.233725	NR_153792		Gm32865	-	predicted gene, 32865	ncRNA
1252	chr2	67829208	67829855	+	2.74	7.77	5.03	3.37e-06	Intergenic	Intergenic	48488	NR_105752	102466627		NR_105752	ENSMUSG00000098734	Mir6335	Gm27836|mmu-mir-6335	microRNA 6335	ncRNA
1253	chr7	82359713	82360056	+	2.91	7.38	4.47	3.4e-06	intron (NM_001190374, intron 2 of 29)	intron (NM_001190374, intron 2 of 29)	24190	NM_001190374	269959	Mm.65306	NM_001190374	ENSMUSG00000070469	Adamtsl3	9230119C12Rik|C130057K09|mKIAA1233	ADAMTS-like 3	protein-coding
1254	chr5	107355735	107356383	+	2.66	7.61	4.95	3.4e-06	intron (NM_054054, intron 7 of 18)	intron (NM_054054, intron 7 of 18)	24865	NM_054054	114642	Mm.182836	NM_054054	ENSMUSG00000029279	Brdt	7420412D09Rik|Brd6|Fsrg3	bromodomain, testis-specific	protein-coding
1255	chr1	21096878	21097508	+	2.54	8.42	5.89	3.4e-06	Intergenic	Intergenic	-17968	NM_177409	170829	Mm.185680	NM_177409	ENSMUSG00000041779	Tram2	C330003D03Rik	translocating chain-associating membrane protein 2	protein-coding
1256	chr1	165084069	165084548	+	2.43	7.92	5.49	3.4e-06	intron (NR_040480, intron 1 of 4)	intron (NR_040480, intron 1 of 4)	7622	NR_040480	75857	Mm.109021	NR_040480	ENSMUSG00000102408	4930568G15Rik	-	RIKEN cDNA 4930568G15 gene	ncRNA
1257	chr5	134872503	134873276	+	2.37	7.75	5.38	3.4e-06	Intergenic	Intergenic	33844	NM_029681	76629	Mm.159750	NM_029681	ENSMUSG00000040576	Tmem270	1700111I05Rik|Wbscr28	transmembrane protein 270	protein-coding
1258	chr1	170655422	170655968	+	2.48	8.09	5.61	3.43e-06	intron (NM_177068, intron 3 of 7)	intron (NM_177068, intron 3 of 7)	11163	NM_177068	320078	Mm.287131	NM_177068	ENSMUSG00000038463	Olfml2b	1110018N05Rik|4832415H08Rik|AI467542	olfactomedin-like 2B	protein-coding
1259	chr12	107755713	107756480	+	2.61	8.08	5.48	3.44e-06	Intergenic	Intergenic	-20608	NR_045973	74968	Mm.359821	NR_045973	ENSMUSG00000085641	4930465M20Rik	4930431H15Rik	RIKEN cDNA 4930465M20 gene	ncRNA
1260	chr9	32986857	32987706	+	2.4	8.12	5.72	3.44e-06	Intergenic	Intergenic	-58315	NR_131058	330917	Mm.488283	NR_131058		Gm27162	A430016B06	predicted gene 27162	ncRNA
1261	chr2	132042858	132043830	+	1.7	9.58	7.88	3.44e-06	Intergenic	Intergenic	-13356	NM_175445	215653	Mm.204737	NM_175445	ENSMUSG00000027339	Rassf2	3830431H01Rik|9030412M04Rik|AI852669|AW495050	Ras association (RalGDS/AF-6) domain family member 2	protein-coding
1262	chr2	166425164	166425454	+	3.42	6.98	3.57	3.45e-06	Intergenic	Intergenic	-22142	NR_015558	319684	Mm.399746	NR_015558		5031425F14Rik	-	RIKEN cDNA 5031425F14 gene	ncRNA
1263	chr10	6013544	6014093	+	2.7	7.18	4.47	3.46e-06	Intergenic	Intergenic	-91418	NM_019958	56533	Mm.44606	NM_019958	ENSMUSG00000019775	Rgs17	6430507P11Rik|Rgsz2	regulator of G-protein signaling 17	protein-coding
1264	chr11	61590392	61591102	+	2.53	8.41	5.88	3.49e-06	Intergenic	Intergenic	-11060	NM_010148	13855	Mm.139695	NM_010148	ENSMUSG00000001036	Epn2	9530051D10Rik|AA536924|Ibp2	epsin 2	protein-coding
1265	chr3	86793379	86794349	+	-2.31	6.19	8.5	3.51e-06	exon (NM_001195499, exon 14 of 18)	exon (NM_001195499, exon 14 of 18)	127020	NM_001195496	70762	Mm.44490	NM_027539	ENSMUSG00000028078	Dclk2	6330415M09Rik|AU044875|CL2|CLICK2|Click-II|Dcamkl2	doublecortin-like kinase 2	protein-coding
1266	chr2	10250361	10250881	+	2.46	7.85	5.39	3.52e-06	intron (NM_172471, intron 13 of 13)	intron (NM_172471, intron 13 of 13)	97078	NM_172471	209378	Mm.313876	NM_172471	ENSMUSG00000025780	Itih5	4631408O11Rik|5430408M01Rik|E130106B02	inter-alpha (globulin) inhibitor H5	protein-coding
1267	chr11	64204855	64205587	+	2.54	7.94	5.4	3.56e-06	Intergenic	Intergenic	125737	NR_033780	66456	Mm.124828	NR_033780	ENSMUSG00000087497	2810001G20Rik	AW045514	RIKEN cDNA 2810001G20 gene	ncRNA
1268	chr8	118433463	118434156	+	-2.32	5.98	8.3	3.56e-06	intron (NM_019707, intron 1 of 13)	intron (NM_019707, intron 1 of 13)	150198	NM_019707	12554	Mm.334841	NM_019707	ENSMUSG00000031841	Cdh13	4932416G01Rik|Cdht|Tcad	cadherin 13	protein-coding
1269	chr9	43325305	43326107	+	2.34	7.74	5.4	3.57e-06	intron (NM_023655, intron 5 of 8)	intron (NM_023655, intron 5 of 8)	14943	NM_023655	72169	Mm.273277	NM_023655	ENSMUSG00000032013	Trim29	1110047J21Rik|2810431N19Rik|4732461M22Rik|AI119726	tripartite motif-containing 29	protein-coding
1270	chr16	95321696	95322527	+	-2.15	6.98	9.13	3.57e-06	Intergenic	Intergenic	-62409	NR_153766	102633941	Mm.384086	NR_153766		Gm31641	-	predicted gene, 31641	ncRNA
1271	chr19	55187383	55187901	+	2.93	7.61	4.69	3.6e-06	intron (NM_009348, intron 4 of 9)	intron (NM_009348, intron 4 of 9)	-5036	NR_106146	102465990		NR_106146	ENSMUSG00000098289	Mir6715	Gm27474|mmu-mir-6715	microRNA 6715	ncRNA
1272	chr4	150798703	150800448	+	2.01	9.11	7.09	3.62e-06	Intergenic	Intergenic	-54221	NM_001356323	74155	Mm.318841	NM_133753	ENSMUSG00000028967	Errfi1	1300002F13Rik|AI788755|Mig-6|Mig6|RALT	ERBB receptor feedback inhibitor 1	protein-coding
1273	chr7	92141852	92142345	+	2.59	7.42	4.84	3.63e-06	intron (NM_011807, intron 13 of 22)	intron (NM_011807, intron 13 of 22)	-22587	NR_131016	75845	Mm.437835	NR_131016	ENSMUSG00000109382	4930567K12Rik	Gm45128	RIKEN cDNA 4930567K12 gene	ncRNA
1274	chr8	25025974	25026728	+	2.5	8.38	5.89	3.63e-06	intron (NM_001081187, intron 8 of 8)	intron (NM_001081187, intron 8 of 8)	9140	NM_027194	69742	Mm.28626	NM_027194	ENSMUSG00000031556	Tm2d2	2410018G23Rik|Blp1	TM2 domain containing 2	protein-coding
1275	chr9	43273699	43274241	+	2.52	7.7	5.18	3.65e-06	intron (NM_001243261, intron 2 of 2)	intron (NM_001243261, intron 2 of 2)	14091	NM_001243261	235302	Mm.135745	NM_001243261		D630033O11Rik	Gm588	RIKEN cDNA D630033O11 gene	protein-coding
1276	chr5	25544074	25544399	+	3.13	6.87	3.74	3.66e-06	Intergenic	MER5A|DNA|hAT-Charlie	14218	NR_027388	73571	Mm.105263	NR_027388	ENSMUSG00000101856	1700096K18Rik	-	RIKEN cDNA 1700096K18 gene	ncRNA
1277	chr12	30885914	30886325	+	2.63	7.33	4.71	3.66e-06	intron (NM_001159743, intron 1 of 4)	intron (NM_001159743, intron 1 of 4)	1795	NM_001159743	100294583	Mm.399726	NM_001159743	ENSMUSG00000054204	Alkal2	6230419C23Rik|Fam150b	ALK and LTK ligand 2	protein-coding
1278	chr9	63702484	63703118	+	2.62	8.18	5.57	3.66e-06	intron (NM_016769, intron 1 of 8)	intron (NM_016769, intron 1 of 8)	55193	NM_016769	17127	Mm.7320	NM_016769	ENSMUSG00000032402	Smad3	AU022421|Madh3	SMAD family member 3	protein-coding
1279	chr1	82460907	82461552	+	2.18	7.96	5.78	3.67e-06	intron (NM_007735, intron 44 of 47)	intron (NM_007735, intron 44 of 47)	122180	NM_001122685	76867	Mm.226994	NM_029777	ENSMUSG00000026142	Rhbdd1	4930418P06Rik|RRP4|mRHBDD1	rhomboid domain containing 1	protein-coding
1280	chr2	5645544	5645967	+	3.08	7.71	4.63	3.68e-06	intron (NM_001290374, intron 1 of 9)	intron (NM_001290374, intron 1 of 9)	30291	NM_001290376	227541	Mm.191949	NM_177343	ENSMUSG00000039145	Camk1d	A630059D12Rik|CKLiK|CaMKIdelta|E030025C11Rik|mCKLiK	calcium/calmodulin-dependent protein kinase ID	protein-coding
1281	chr9	98428713	98429258	+	2.38	8.24	5.86	3.7e-06	intron (NM_011254, intron 2 of 3)	intron (NM_011254, intron 2 of 3)	6024	NM_011254	19659	Mm.279741	NM_011254	ENSMUSG00000046402	Rbp1	CRBPI|Crbp|Rbp-1	retinol binding protein 1, cellular	protein-coding
1282	chr9	36946840	36947580	+	2.49	8.55	6.06	3.76e-06	intron (NM_001029838, intron 5 of 12)	intron (NM_001029838, intron 5 of 12)	113636	NM_001357611	235180	Mm.5264	NM_183171	ENSMUSG00000032118	Fez1	UNC-76|UNC76	fasciculation and elongation protein zeta 1 (zygin I)	protein-coding
1283	chr17	24556796	24557682	+	2.09	9.19	7.09	3.76e-06	intron (NM_013630, intron 1 of 45)	L2|LINE|L2	7289	NM_013630	18763	Mm.30435	NM_013630	ENSMUSG00000032855	Pkd1	PC1|mFLJ00285	polycystin 1, transient receptor poteintial channel interacting	protein-coding
1284	chr16	90677131	90677767	+	2.21	8.52	6.3	3.77e-06	Intergenic	Intergenic	49922	NM_025642	66578	Mm.180363	NM_025642	ENSMUSG00000022978	Mis18a	2610039C10Rik|2810018N07Rik	MIS18 kinetochore protein A	protein-coding
1285	chr3	9669812	9670191	+	3.12	7.5	4.38	3.79e-06	Intergenic	Intergenic	-59916	NM_133218	170753	Mm.212908	NM_133218	ENSMUSG00000040209	Zfp704	C030026M03|C030034L19Rik|Gig1|Znf704	zinc finger protein 704	protein-coding
1286	chr11	45175114	45175651	+	2.85	7.21	4.36	3.84e-06	Intergenic	Intergenic	-58454	NR_045100	100504255	Mm.123608	NR_045100	ENSMUSG00000084773	Gm12159	-	predicted gene 12159	ncRNA
1287	chr18	30958659	30959144	+	2.43	7.34	4.91	3.86e-06	Intergenic	Intergenic	358227	NM_009065	19762	Mm.5163	NM_009065	ENSMUSG00000057455	Rit2	RIBA|Rin|Roc2	Ras-like without CAAX 2	protein-coding
1288	chr4	98318735	98319257	+	2.59	7.58	4.99	3.88e-06	Intergenic	Intergenic	64269	NM_053157	94043	Mm.331719	NM_053157	ENSMUSG00000028563	Tm2d1	2310026L18Rik|AA990549|Bbp	TM2 domain containing 1	protein-coding
1289	chr14	73217087	73217449	+	2.84	7.54	4.7	3.89e-06	intron (NM_009029, intron 17 of 26)	RMER6A|LTR|ERVK	-10417	NR_030459	751541		NR_030459	ENSMUSG00000076121	Mir687	Mirn687|mir-687|mmu-mir-687	microRNA 687	ncRNA
1290	chr3	93537096	93537620	+	2.65	7.62	4.97	3.93e-06	Intergenic	Intergenic	16862	NM_016740	20195	Mm.280038	NM_016740	ENSMUSG00000027907	S100a11	EMAPI|Emap1|S100a14|S100c|cal	S100 calcium binding protein A11	protein-coding
1291	chr18	61053767	61055753	+	2.35	9.27	6.92	3.93e-06	intron (NM_008809, intron 1 of 22)	intron (NM_008809, intron 1 of 22)	9610	NM_008809	18596	Mm.4146	NM_008809	ENSMUSG00000024620	Pdgfrb	AI528809|CD140b|PDGFR-1|Pdgfr	platelet derived growth factor receptor, beta polypeptide	protein-coding
1292	chr12	36224451	36225133	+	-2.44	5.87	8.31	3.93e-06	intron (NM_001361098, intron 3 of 8)	intron (NM_001361098, intron 3 of 8)	-6574	NM_027699	71156	Mm.250837	NM_027699	ENSMUSG00000020545	Lrrc72	1700108M19Rik|4933421E18Rik	leucine rich repeat containing 72	protein-coding
1293	chr18	33259358	33260728	+	-2.01	7.26	9.27	3.94e-06	Intergenic	Intergenic	-46181	NM_001347624	170459	Mm.127058	NM_133774	ENSMUSG00000024378	Stard4	4632419C16Rik|9030213J02Rik	StAR-related lipid transfer (START) domain containing 4	protein-coding
1294	chr17	14252503	14252970	+	3.14	7.05	3.9	3.96e-06	Intergenic	Intergenic	-26770	NM_022315	64074	Mm.30162	NM_022315	ENSMUSG00000023886	Smoc2	1700056C05Rik|5430426J21Rik|Smoc2l	SPARC related modular calcium binding 2	protein-coding
1295	chr8	25329735	25330296	+	2.72	7.46	4.75	3.99e-06	Intergenic	Intergenic	-23745	NR_040352	74489	Mm.256468	NR_040352	ENSMUSG00000110140	5430421F17Rik	-	RIKEN cDNA 5430421F17 gene	ncRNA
1296	chr2	157407489	157408237	+	2.46	8.12	5.66	3.99e-06	Intergenic	Intergenic	-16430	NM_009271	20779	Mm.22845	NM_009271	ENSMUSG00000027646	Src	AW259666|pp60c-src	Rous sarcoma oncogene	protein-coding
1297	chr15	80050988	80052390	+	-2.15	6.9	9.05	4.01e-06	Intergenic	Intergenic	26890	NR_028282	100302601		NR_028282	ENSMUSG00000077734	Snord83b	MBII-10	small nucleolar RNA, C/D box 83B	snoRNA
1298	chr7	65979000	65979779	+	2.95	7.93	4.98	4.02e-06	intron (NM_011048, intron 11 of 21)	intron (NM_011048, intron 11 of 21)	-80947	NM_021336	68981	Mm.22362	NM_021336	ENSMUSG00000030512	Snrpa1	1500015N06Rik	small nuclear ribonucleoprotein polypeptide A'	protein-coding
1299	chr9	102863694	102864604	+	2.37	8.63	6.26	4.02e-06	intron (NM_001042607, intron 2 of 14)	intron (NM_001042607, intron 2 of 14)	29229	NM_001284258	20187	Mm.335391	NM_013649	ENSMUSG00000032547	Ryk	AW536699|ERK-3|Vik	receptor-like tyrosine kinase	protein-coding
1300	chr12	80885276	80886192	+	2.02	9.45	7.44	4.02e-06	Intergenic	Intergenic	38713	NR_033786	67340	Mm.386790	NR_033786	ENSMUSG00000101912	1700052I22Rik	-	RIKEN cDNA 1700052I22 gene	ncRNA
1301	chr17	14700194	14700771	+	3.01	7.48	4.47	4.06e-06	Intergenic	Intergenic	-6220	NM_011581	21826	Mm.26688	NM_011581	ENSMUSG00000023885	Thbs2	TSP2|Thbs-2	thrombospondin 2	protein-coding
1302	chr9	7545448	7545870	+	2.77	7.9	5.12	4.06e-06	Intergenic	Intergenic	-12770	NM_008611	17394	Mm.16415	NM_008611	ENSMUSG00000005800	Mmp8	BB138268	matrix metallopeptidase 8	protein-coding
1303	chr10	8935464	8936195	+	2.41	8.44	6.03	4.06e-06	Intergenic	Intergenic	-49759	NM_175155	70097	Mm.338275	NM_175155	ENSMUSG00000015305	Sash1	1100001C18Rik|2500002E12Rik|A330076K04Rik|mKIAA0790	SAM and SH3 domain containing 1	protein-coding
1304	chr9	20814386	20815348	+	2.25	8.54	6.29	4.06e-06	exon (NM_001317388, exon 1 of 67)	exon (NM_001317388, exon 1 of 67)	200	NM_001317388	53867	Mm.334994	NM_016919	ENSMUSG00000004098	Col5a3	-	collagen, type V, alpha 3	protein-coding
1305	chr2	132599145	132599505	+	2.48	7.54	5.06	4.07e-06	intron (NR_033469, intron 1 of 3)	intron (NR_033469, intron 1 of 3)	1129	NR_033468	767814	Mm.371752	NR_033468	ENSMUSG00000074783	AU019990	-	expressed sequence AU019990	ncRNA
1306	chr10	115328436	115328928	+	2.63	7.81	5.18	4.1e-06	Intergenic	MER70B|LTR|ERVL	-13091	NM_024454	216344	Mm.21936	NM_024454	ENSMUSG00000020132	Rab21	9630024B22	RAB21, member RAS oncogene family	protein-coding
1307	chr5	111893767	111894616	+	2.48	8.29	5.81	4.11e-06	Intergenic	Intergenic	-132463	NR_045833	269683	Mm.136946	NM_207252	ENSMUSG00000085271	E130006D01Rik	Gm16018|Gm681	RIKEN cDNA E130006D01 gene	ncRNA
1308	chr4	149233968	149234546	+	-2.27	5.56	7.83	4.14e-06	3' UTR (NM_008441, exon 21 of 21)	3' UTR (NM_008441, exon 21 of 21)	-67552	NM_001081274	110208	Mm.252080	NM_025801	ENSMUSG00000028961	Pgd	0610042A05Rik|AU019875|C78335	phosphogluconate dehydrogenase	protein-coding
1309	chr13	60078227	60078979	+	2.46	8.23	5.77	4.15e-06	intron (NR_046142, intron 1 of 2)	intron (NR_046142, intron 1 of 2)	48892	NR_046142	328263	Mm.123405	NR_046142	ENSMUSG00000114531	A530065N20Rik	A530065N20	RIKEN cDNA A530046M15 gene	ncRNA
1310	chr16	37728600	37729025	+	2.34	7.96	5.63	4.17e-06	Intergenic	Intergenic	-48243	NM_008047	14314	Mm.182434	NM_008047	ENSMUSG00000022816	Fstl1	AI316791|AW107808|Fstl|TSC-36	follistatin-like 1	protein-coding
1311	chr8	47242496	47243260	+	2.41	8.85	6.44	4.18e-06	intron (NM_175162, intron 1 of 4)	intron (NM_175162, intron 1 of 4)	46524	NM_001114311	71069	Mm.23973	NM_175162	ENSMUSG00000038143	Stox2	4933409N07Rik|AI449080|AI835114|mKIAA1392	storkhead box 2	protein-coding
1312	chr14	106052658	106053177	+	3.12	6.84	3.71	4.2e-06	Intergenic	Intergenic	-53281	NM_198601	212085	Mm.78128	NM_198601	ENSMUSG00000022113	Trim52	4921513B05Rik	tripartite motif-containing 52	protein-coding
1313	chr13	56360592	56361282	+	2.57	7.9	5.33	4.23e-06	Intergenic	MLT1C|LTR|ERVL-MaLR	-1963	NR_046061	100038494	Mm.370447	NR_046061	ENSMUSG00000074885	Gm10782	-	predicted gene 10782	ncRNA
1314	chr5	43441382	43441961	+	2.53	7.87	5.34	4.24e-06	Intergenic	G-rich|Low_complexity|Low_complexity	-73898	NM_001135172	109323	Mm.275553	NM_175425	ENSMUSG00000061535	C1qtnf7	5530401N20Rik|8430425G24Rik|Ctrp7	C1q and tumor necrosis factor related protein 7	protein-coding
1315	chr4	83831180	83831958	+	2.34	8.31	5.97	4.25e-06	intron (NM_001355549, intron 24 of 24)	intron (NM_001355549, intron 24 of 24)	213310	NR_130998	78238	Mm.243903	NR_130998	ENSMUSG00000085217	6030471H07Rik	-	RIKEN cDNA 6030471H07 gene	ncRNA
1316	chr19	58422841	58423990	+	2.74	8.54	5.8	4.26e-06	intron (NM_010279, intron 4 of 10)	intron (NM_010279, intron 4 of 10)	31983	NR_104342	14585	Mm.88367	NM_010279	ENSMUSG00000025089	Gfra1	AU042498	glial cell line derived neurotrophic factor family receptor alpha 1	protein-coding
1317	chr2	124258057	124258485	+	2.68	7.26	4.58	4.27e-06	intron (NM_001290997, intron 2 of 20)	intron (NM_001290997, intron 2 of 20)	-35913	NR_040612	75946	Mm.415059	NR_040612	ENSMUSG00000086954	4930583P06Rik	-	RIKEN cDNA 4930583P06 gene	ncRNA
1318	chr16	89894762	89895274	+	2.84	7.63	4.79	4.29e-06	intron (NM_009384, intron 4 of 27)	intron (NM_009384, intron 4 of 27)	65809	NM_009384	21844	Mm.310902	NM_009384	ENSMUSG00000002489	Tiam1	AI847750|D16Ium10|D16Ium10e	T cell lymphoma invasion and metastasis 1	protein-coding
1319	chr1	185969250	185969831	+	3.13	7.34	4.21	4.33e-06	intron (NR_030555, intron 5 of 6)	intron (NR_030555, intron 5 of 6)	147770	NM_146106	226791	Mm.257116	NM_146106	ENSMUSG00000039246	Lyplal1	BC027340|Q96AVO	lysophospholipase-like 1	protein-coding
1320	chr11	44948484	44948953	+	2.68	7.31	4.63	4.35e-06	intron (NM_001290709, intron 10 of 15)	intron (NM_001290709, intron 10 of 15)	168210	NR_045100	100504255	Mm.123608	NR_045100	ENSMUSG00000084773	Gm12159	-	predicted gene 12159	ncRNA
1321	chr11	67390719	67391402	+	3.1	7.21	4.11	4.36e-06	Intergenic	Intergenic	63957	NM_001081250	544791	Mm.461064	NM_001081250	ENSMUSG00000060180	Myh13	MyHC-eo	myosin, heavy polypeptide 13, skeletal muscle	protein-coding
1322	chr15	5347719	5348329	+	2.73	7.73	5	4.36e-06	Intergenic	Intergenic	-103837	NM_001136079	19219	Mm.18509	NM_008965	ENSMUSG00000039942	Ptger4	EP4|Ptgerep4	prostaglandin E receptor 4 (subtype EP4)	protein-coding
1323	chr10	56754589	56755149	+	-2.4	5.99	8.39	4.36e-06	Intergenic	(A)n|Simple_repeat|Simple_repeat	322888	NR_152768	102640560	Mm.417249	NR_152768		Gm36595	-	predicted gene, 36595	ncRNA
1324	chr5	130089627	130090036	+	2.73	7.38	4.65	4.37e-06	intron (NM_001130476, intron 1 of 5)	intron (NM_001130476, intron 1 of 5)	10461	NM_001130476	22021	Mm.332720	NM_013837	ENSMUSG00000034118	Tpst1	R75054|Tango13a	protein-tyrosine sulfotransferase 1	protein-coding
1325	chr11	82053703	82054466	+	2.64	7.63	4.99	4.37e-06	Intergenic	Intergenic	-3748	NM_011330	20292	Mm.4686	NM_011330	ENSMUSG00000020676	Ccl11	Scya11|eotaxin	chemokine (C-C motif) ligand 11	protein-coding
1326	chr16	45349512	45350355	+	-2.25	6.4	8.65	4.37e-06	Intergenic	Intergenic	59120	NM_010818	17470	Mm.245851	NM_010818	ENSMUSG00000022661	Cd200	Mox2|OX2	CD200 antigen	protein-coding
1327	chr12	15777099	15777712	+	-2.55	5.13	7.68	4.37e-06	Intergenic	Intergenic	23696	NR_105809	102465204		NR_105809	ENSMUSG00000098480	Mir6387	Gm27281|mmu-mir-6387	microRNA 6387	ncRNA
1328	chr5	136888501	136889351	+	2.65	7.89	5.24	4.4e-06	Intergenic	Intergenic	-5711	NM_024474	140709	Mm.295020	NM_024474	ENSMUSG00000004415	Col26a1	9430032K24Rik|BC002218|Col26a|Emid2|Emu2	collagen, type XXVI, alpha 1	protein-coding
1329	chr9	43292980	43293426	+	3.09	6.96	3.87	4.41e-06	Intergenic	ID_B1|SINE|B4	-17560	NM_023655	72169	Mm.273277	NM_023655	ENSMUSG00000032013	Trim29	1110047J21Rik|2810431N19Rik|4732461M22Rik|AI119726	tripartite motif-containing 29	protein-coding
1330	chr5	47240552	47241078	+	2.34	7.89	5.55	4.41e-06	Intergenic	Intergenic	-742340	NM_001291228	20563	Mm.289739	NM_178804	ENSMUSG00000031558	Slit2	Drad-1|E030015M03Rik|E130320P19Rik|Slil3|b2b1200.1Clo|mKIAA4141|slit-2	slit guidance ligand 2	protein-coding
1331	chrX	18461155	18461778	+	-2.86	5.43	8.29	4.41e-06	promoter-TSS (NR_132634)	promoter-TSS (NR_132634)	-69	NM_175228	75905	Mm.159617	NM_175228	ENSMUSG00000037358	4930578C19Rik	-	RIKEN cDNA 4930578C19 gene	protein-coding
1332	chr12	80504713	80505161	+	3.06	7.98	4.92	4.46e-06	Intergenic	Intergenic	-2269	NR_045490	69522	Mm.390530	NR_045490	ENSMUSG00000112701	2310002D06Rik	-	RIKEN cDNA 2310002D06 gene	ncRNA
1333	chr2	147683369	147683923	+	2.66	7.12	4.46	4.46e-06	Intergenic	Intergenic	-27047	NR_046014	381384	Mm.259809	NR_046014	ENSMUSG00000051986	A530006G24Rik	Gm1003	RIKEN cDNA A530006G24 gene	ncRNA
1334	chr1	51265050	51266349	+	-1.57	7.99	9.56	4.46e-06	intron (NR_045151, intron 2 of 4)	intron (NR_045151, intron 2 of 4)	-23427	NM_138741	20324	Mm.398690	NM_138741	ENSMUSG00000045954	Cavin2	Sdpr	caveolae associated 2	protein-coding
1335	chr7	126606938	126607630	+	2.71	7.55	4.84	4.49e-06	Intergenic	Intergenic	-12374	NM_145636	246779	Mm.222632	NM_145636	ENSMUSG00000044701	Il27	IL-27|IL-27p28|Il30|p28	interleukin 27	protein-coding
1336	chr7	112603813	112604203	+	2.77	7.24	4.47	4.5e-06	Intergenic	Intergenic	-68325	NR_154466	102636183	Mm.446701	NR_154466		Parvaos	A230071N21Rik	parvin, alpha, opposite strand	ncRNA
1337	chr9	63031123	63031721	+	2.53	7.86	5.33	4.51e-06	Intergenic	Intergenic	-50543	NM_019663	56469	Mm.431253	NM_019663	ENSMUSG00000032405	Pias1	2900068C24Rik|Ddxbp1|GBP	protein inhibitor of activated STAT 1	protein-coding
1338	chr9	32885986	32886836	+	-2.27	6.14	8.41	4.51e-06	Intergenic	Intergenic	42555	NR_131058	330917	Mm.488283	NR_131058		Gm27162	A430016B06	predicted gene 27162	ncRNA
1339	chr12	71418172	71418591	+	3.13	7.69	4.56	4.52e-06	Intergenic	Intergenic	-34173	NR_136902	67348	Mm.54261	NR_136902	ENSMUSG00000100668	1700083H02Rik	100041190|Gm3190	RIKEN cDNA 1700083H02 gene	ncRNA
1340	chr10	111818878	111819582	+	2.78	7.75	4.97	4.62e-06	Intergenic	Intergenic	55146	NR_046029	629206	Mm.391444	NR_046029	ENSMUSG00000112533	Gm20758	-	predicted gene, 20758	ncRNA
1341	chr6	16958183	16958570	+	2.77	6.93	4.16	4.62e-06	Intergenic	Intergenic	-59935	NM_031198	21426	Mm.36217	NM_031198	ENSMUSG00000029553	Tfec	BB107417|Tcfec|bHLHe34	transcription factor EC	protein-coding
1342	chr10	4116596	4117028	+	3.33	6.73	3.4	4.66e-06	intron (NM_001170785, intron 26 of 27)	intron (NM_001170785, intron 26 of 27)	96308	NR_152620	102632515	Mm.416995	NR_152620	ENSMUSG00000111266	Gm30570	-	predicted gene, 30570	ncRNA
1343	chr7	127280031	127280596	+	2.91	7.43	4.52	4.67e-06	Intergenic	RLTR49|LTR|ERVK	-6254	NM_009266	20768	Mm.20294	NM_009266	ENSMUSG00000049091	Sephs2	Sps2|Ysg3	selenophosphate synthetase 2	protein-coding
1344	chr17	26357752	26358260	+	2.78	8.03	5.25	4.67e-06	Intergenic	Intergenic	-56959	NM_001081656	240055	Mm.133211	NM_001081656	ENSMUSG00000034413	Neurl1b	C230078M08Rik|EG240055	neuralized E3 ubiquitin protein ligase 1B	protein-coding
1345	chr2	101762450	101763463	+	2.4	8.77	6.37	4.67e-06	intron (NM_001355625, intron 3 of 8)	intron (NM_001355625, intron 3 of 8)	34751	NM_175181	72446	Mm.24138	NM_175181	ENSMUSG00000032841	Prr5l	2600010E01Rik|4833411O04Rik|Protor-2|Protor2	proline rich 5 like	protein-coding
1346	chr6	126090122	126090378	+	3.37	6.71	3.34	4.68e-06	Intergenic	Intergenic	74710	NM_001164035	18205	Mm.267570	NM_008742	ENSMUSG00000049107	Ntf3	AI316846|AI835689|HDNF|NGF-2|Nt3|Ntf-3	neurotrophin 3	protein-coding
1347	chr11	116985761	116986838	+	2.41	7.85	5.44	4.7e-06	3' UTR (NM_172948, exon 17 of 17)	3' UTR (NM_172948, exon 17 of 17)	67436	NM_172948	268510	Mm.35141	NM_172948	ENSMUSG00000043857	Mgat5b	C330018B01|GnT-IX|mGnTVB	mannoside acetylglucosaminyltransferase 5, isoenzyme B	protein-coding
1348	chr6	31642070	31643109	+	-1.88	7.2	9.08	4.76e-06	Intergenic	Intergenic	23542	NR_152155	434003	Mm.332979	NR_152155	ENSMUSG00000084973	Gm13848	-	predicted gene 13848	ncRNA
1349	chr2	52779403	52779715	+	2.59	7.28	4.69	4.78e-06	Intergenic	Intergenic	-37410	NM_019667	56324	Mm.263639	NM_019667	ENSMUSG00000055371	Stam2	1200004O12Rik|5730456G07Rik|BB145015|Hbp	signal transducing adaptor molecule (SH3 domain and ITAM motif) 2	protein-coding
1350	chr5	92997161	92998841	+	1.92	9.4	7.48	4.78e-06	Intergenic	Intergenic	47021	NM_175270	78088	Mm.245085	NM_175270	ENSMUSG00000045314	Sowahb	5730467H21Rik|Ankrd56	sosondowah ankyrin repeat domain family member B	protein-coding
1351	chr4	114533515	114534887	+	1.58	9.77	8.19	4.78e-06	intron (NM_001085549, intron 2 of 6)	intron (NM_001085549, intron 2 of 6)	127477	NM_001085549	666048	Mm.331779	NM_001085549	ENSMUSG00000070867	Trabd2b	Gm12824|Hkat	TraB domain containing 2B	protein-coding
1352	chr7	97345202	97345703	+	2.71	7.58	4.87	4.8e-06	intron (NM_001039039, intron 1 of 1)	intron (NM_001039039, intron 1 of 1)	13129	NM_001039039	622320	Mm.334029	NM_001039039	ENSMUSG00000044952	Kctd21	EG622320	potassium channel tetramerisation domain containing 21	protein-coding
1353	chr4	63253625	63254268	+	2.37	7.75	5.39	4.8e-06	intron (NM_025685, intron 8 of 60)	intron (NM_025685, intron 8 of 60)	-2905	NR_030477	735262		NR_030477	ENSMUSG00000070102	Mir455	Mirn455|mir-455|mmu-mir-455	microRNA 455	ncRNA
1354	chr10	30768242	30768630	+	2.75	7.5	4.75	4.81e-06	intron (NM_001358842, intron 2 of 14)	intron (NM_001358842, intron 2 of 14)	34890	NM_172495	211329	Mm.297903	NM_172495	ENSMUSG00000039697	Ncoa7	9030406N13Rik	nuclear receptor coactivator 7	protein-coding
1355	chr2	132005476	132007290	+	2.03	9.39	7.36	4.81e-06	intron (NM_175445, intron 4 of 10)	intron (NM_175445, intron 4 of 10)	23605	NM_175445	215653	Mm.204737	NM_175445	ENSMUSG00000027339	Rassf2	3830431H01Rik|9030412M04Rik|AI852669|AW495050	Ras association (RalGDS/AF-6) domain family member 2	protein-coding
1356	chr9	78138285	78138656	+	2.76	7.56	4.8	4.84e-06	intron (NM_001163780, intron 3 of 13)	intron (NM_001163780, intron 3 of 13)	25232	NM_019987	56542	Mm.288719	NM_019987	ENSMUSG00000009828	Ick	2210420N10Rik|AI848300|Mrk	intestinal cell kinase	protein-coding
1357	chr12	71467891	71468811	+	2.3	8.03	5.73	4.84e-06	Intergenic	Intergenic	-72256	NR_045941	73815	Mm.416916	NR_045941	ENSMUSG00000113630	4930404H11Rik	-	RIKEN cDNA 4930404H11 gene	ncRNA
1358	chr2	13422017	13422507	+	2.37	7.89	5.52	4.85e-06	intron (NM_001081084, intron 27 of 66)	intron (NM_001081084, intron 27 of 66)	69614	NM_001081084	65969	Mm.313915	NM_001081084	ENSMUSG00000026726	Cubn	AA408369|AL022750|D2Wsu88e	cubilin (intrinsic factor-cobalamin receptor)	protein-coding
1359	chr4	84087949	84088598	+	2.27	8.21	5.94	4.94e-06	Intergenic	Intergenic	-43394	NR_130998	78238	Mm.243903	NR_130998	ENSMUSG00000085217	6030471H07Rik	-	RIKEN cDNA 6030471H07 gene	ncRNA
1360	chr7	68311307	68311880	+	2.71	7.92	5.22	4.97e-06	intron (NM_001013811, intron 3 of 8)	intron (NM_001013811, intron 3 of 8)	-34999	NR_040340	100504026	Mm.426764	NR_040340	ENSMUSG00000086628	Gm16157	-	predicted gene 16157	ncRNA
1361	chr3	108327863	108328887	+	2.09	8.63	6.54	4.97e-06	intron (NM_019972, intron 6 of 19)	intron (NM_019972, intron 6 of 19)	-36536	NM_026831	68753	Mm.75201	NM_026831	ENSMUSG00000068745	Mybphl	1110037P11Rik	myosin binding protein H-like	protein-coding
1362	chr13	110683306	110683970	+	-2.47	4.92	7.39	4.98e-06	Intergenic	Intergenic	-219861	NR_131193	75139	Mm.490931	NR_131193	ENSMUSG00000114472	Gm38397	-	predicted gene, 38397	ncRNA
1363	chr17	46081347	46082181	+	2.51	7.99	5.48	5e-06	Intergenic	Intergenic	-29240	NM_026768	68565	Mm.287443	NM_026768	ENSMUSG00000023967	Mrps18a	1110004O20Rik|C79712	mitochondrial ribosomal protein S18A	protein-coding
1364	chr5	21527209	21528890	+	2.35	8.93	6.58	5.01e-06	intron (NM_001199632, intron 12 of 20)	intron (NM_001199632, intron 12 of 20)	-15478	NM_028977	74511	Mm.439963	NM_028977	ENSMUSG00000039883	Lrrc17	37kDa|4833425M04Rik|6130400C22Rik|P37nb	leucine rich repeat containing 17	protein-coding
1365	chr16	25865515	25865873	+	2.81	7.25	4.44	5.02e-06	intron (NM_001127262, intron 5 of 10)	intron (NM_001127262, intron 5 of 10)	63778	NM_011641	22061	Mm.20894	NM_011641	ENSMUSG00000022510	Trp63	AI462811|Ket|P51/P63|P63|P73l|Tp63|Trp53rp1	transformation related protein 63	protein-coding
1366	chr18	78431218	78431969	+	2.39	7.96	5.56	5.04e-06	intron (NM_207651, intron 2 of 21)	intron (NM_207651, intron 2 of 21)	165357	NM_207651	27411	Mm.44158	NM_030683	ENSMUSG00000024552	Slc14a2	UT-A1|UT-A3	solute carrier family 14 (urea transporter), member 2	protein-coding
1367	chr9	84739308	84739602	+	3.15	6.71	3.57	5.13e-06	Intergenic	Intergenic	-34943	NR_040739	75253	Mm.401984	NR_040739	ENSMUSG00000099724	4930554C24Rik	-	RIKEN cDNA 4930554C24 gene	ncRNA
1368	chr2	19064533	19065401	+	2.36	8.08	5.71	5.17e-06	Intergenic	Intergenic	66648	NR_024323	74629	Mm.117687	NR_024323	ENSMUSG00000026736	4930426L09Rik	-	RIKEN cDNA 4930426L09 gene	ncRNA
1369	chr3	63406408	63407075	+	2.94	8.59	5.64	5.18e-06	Intergenic	Intergenic	-32510	NR_153189	102637430	Mm.209619	NR_153189	ENSMUSG00000104336	Gm34240	-	predicted gene, 34240	ncRNA
1370	chr9	20804885	20805663	+	2.59	7.99	5.41	5.2e-06	intron (NM_016919, intron 6 of 66)	intron (NM_016919, intron 6 of 66)	9793	NM_001317388	53867	Mm.334994	NM_016919	ENSMUSG00000004098	Col5a3	-	collagen, type V, alpha 3	protein-coding
1371	chr17	78524660	78525233	+	2.42	7.48	5.05	5.2e-06	intron (NM_001197028, intron 1 of 12)	intron (NM_001197028, intron 1 of 12)	16883	NM_001197028	74199	Mm.292983	NM_028813	ENSMUSG00000024076	Vit	1700052E02Rik|1700110E08Rik|2810429K11Rik|AKH|akhirin	vitrin	protein-coding
1372	chr3	130986572	130987059	+	2.89	7.6	4.71	5.22e-06	Intergenic	Intergenic	-123482	NM_001276402	16842	Mm.255219	NM_010703	ENSMUSG00000027985	Lef1	3000002B05|AI451430|Lef-1	lymphoid enhancer binding factor 1	protein-coding
1373	chr15	64535041	64535675	+	2.47	8.2	5.73	5.24e-06	Intergenic	Intergenic	-152439	NM_001276467	13196	Mm.277236	NM_010026	ENSMUSG00000022377	Asap1	AV239055|DEF-1|Ddef1|PAP|mKIAA1249|s19	ArfGAP with SH3 domain, ankyrin repeat and PH domain1	protein-coding
1374	chr9	43252864	43253724	+	2.38	8.43	6.05	5.24e-06	Intergenic	Intergenic	-6585	NM_001243261	235302	Mm.135745	NM_001243261		D630033O11Rik	Gm588	RIKEN cDNA D630033O11 gene	protein-coding
1375	chr2	151003686	151004468	+	2.26	8.48	6.22	5.25e-06	intron (NM_207204, intron 1 of 23)	intron (NM_207204, intron 1 of 23)	5321	NM_207204	78177	Mm.120911	NM_207204	ENSMUSG00000068115	Ninl	4930519N13Rik|Gm1004|Gm1634|mKIAA0980	ninein-like	protein-coding
1376	chr6	135333787	135334801	+	1.85	8.83	6.98	5.29e-06	Intergenic	Intergenic	-23910	NM_029595	76400	Mm.293018	NM_029595	ENSMUSG00000047104	Pbp2	1700023A18Rik|AI326308|Pebp-2|Pebp2	phosphatidylethanolamine binding protein 2	protein-coding
1377	chr1	168012069	168012688	+	2.56	8.03	5.47	5.31e-06	Intergenic	Intergenic	322820	NM_033652	110648	Mm.330081	NM_033652	ENSMUSG00000026686	Lmx1a	Lmx1.1|dr|dreher|sst	LIM homeobox transcription factor 1 alpha	protein-coding
1378	chr4	103781256	103781870	+	2.72	8.1	5.38	5.33e-06	Intergenic	Intergenic	399063	NR_040673	622167	Mm.244115	NR_040673	ENSMUSG00000086136	Gm12718	-	predicted gene 12718	ncRNA
1379	chr7	68134860	68135411	+	2.73	7.51	4.78	5.36e-06	intron (NM_010513, intron 2 of 20)	intron (NM_010513, intron 2 of 20)	129098	NM_030101	78444	Mm.425468	NM_030101	ENSMUSG00000030553	Pgpep1l	C330024D12Rik	pyroglutamyl-peptidase I-like	protein-coding
1380	chr9	31999805	32000061	+	3.22	6.84	3.61	5.39e-06	Intergenic	Intergenic	-86648	NM_013800	12023	Mm.261044	NM_013800	ENSMUSG00000032033	Barx2	2310006E12Rik|Barx2b	BarH-like homeobox 2	protein-coding
1381	chr3	21524386	21525019	+	2.25	7.77	5.52	5.39e-06	Intergenic	LTR88b|LTR|Gypsy?	-551950	NM_030732	81004	Mm.202966	NM_030732	ENSMUSG00000027630	Tbl1xr1	8030499H02Rik|A630076E03Rik|AW539987|C21|C230089I12Rik|DC42|Ira1|TBLR1	transducin (beta)-like 1X-linked receptor 1	protein-coding
1382	chr9	60696297	60696945	+	2.54	7.64	5.09	5.41e-06	Intergenic	Intergenic	-8487	NM_145616	102747	Mm.269413	NM_145616	ENSMUSG00000047766	Lrrc49	AI430817|AW050057|D430025H09Rik|PGs4|p79	leucine rich repeat containing 49	protein-coding
1383	chr2	75757015	75757661	+	2.29	8.22	5.93	5.43e-06	Intergenic	L1MA5|LINE|L1	-52675	NR_132727	18024	Mm.1025	NM_010902	ENSMUSG00000015839	Nfe2l2	Nrf2	nuclear factor, erythroid derived 2, like 2	protein-coding
1384	chr1	136683129	136684321	+	1.9	9.26	7.36	5.44e-06	promoter-TSS (NR_045325)	promoter-TSS (NR_045325)	96	NR_045325	100503460	Mm.30630	NR_045324	ENSMUSG00000097113	Gm19705	-	predicted gene, 19705	ncRNA
1385	chrX	129332947	129333232	+	-3.17	3.25	6.42	5.44e-06	Intergenic	RLTR13C2|LTR|ERVK	281565	NR_045441	75274	Mm.108718	NR_045441	ENSMUSG00000086244	4930558G05Rik	-	RIKEN cDNA 4930558G05 gene	ncRNA
1386	chr4	109244478	109244841	+	3.03	7.21	4.17	5.48e-06	intron (NM_001033226, intron 4 of 7)	intron (NM_001033226, intron 4 of 7)	9027	NM_001033226	108802	Mm.318248	NM_001033226	ENSMUSG00000028558	Calr4	4933403L16Rik|AU017583	calreticulin 4	protein-coding
1387	chr4	149902770	149903712	+	2.22	8.87	6.65	5.48e-06	intron (NM_029035, intron 2 of 2)	L2|LINE|L2	51765	NM_029035	74646	Mm.30	NM_029035	ENSMUSG00000039911	Spsb1	1110014L01Rik|4930422J18Rik|AI596360|AI854583|SSB-1|SSB1	splA/ryanodine receptor domain and SOCS box containing 1	protein-coding
1388	chr15	38594118	38594620	+	2.13	7.82	5.69	5.49e-06	intron (NR_045757, intron 1 of 2)	intron (NR_045757, intron 1 of 2)	565	NR_045757	69679	Mm.416890	NR_045757	ENSMUSG00000102106	2310043O21Rik	-	RIKEN cDNA 2310043O21 gene	ncRNA
1389	chr10	86365544	86366194	+	2.48	7.9	5.42	5.5e-06	intron (NM_013722, intron 4 of 13)	intron (NM_013722, intron 4 of 13)	65457	NM_011595	21859	Mm.4871	NM_011595	ENSMUSG00000020044	Timp3	Timp-3	tissue inhibitor of metalloproteinase 3	protein-coding
1390	chr4	15012357	15012894	+	2.23	8.02	5.78	5.5e-06	intron (NM_178617, intron 5 of 12)	intron (NM_178617, intron 5 of 12)	81984	NM_001243100	100038514	Mm.331495	NM_001243100		Gm11837	-	predicted gene 11837	protein-coding
1391	chr3	60958750	60959133	+	3.01	7.29	4.27	5.51e-06	Intergenic	Intergenic	-43844	NM_008772	18441	Mm.281452	NM_008772	ENSMUSG00000027765	P2ry1	P2Y1	purinergic receptor P2Y, G-protein coupled 1	protein-coding
1392	chr13	26405907	26406341	+	-3.15	3.33	6.48	5.53e-06	Intergenic	L2a|LINE|L2	-93718	NR_045933	73576	Mm.45473	NR_045933	ENSMUSG00000084811	1700092E19Rik	-	RIKEN cDNA 1700092E19 gene	ncRNA
1393	chr19	22912990	22913382	+	2.75	7.43	4.67	5.56e-06	intron (NM_001035239, intron 18 of 24)	intron (NM_001035239, intron 18 of 24)	162581	NR_029591	387200		NR_029591	ENSMUSG00000065507	Mir204	Mirn204|mir-204|mmu-mir-204	microRNA 204	ncRNA
1394	chr6	85856088	85856808	+	2.49	8.13	5.64	5.57e-06	Intergenic	Intergenic	12689	NM_053096	93673	Mm.24251	NM_053096	ENSMUSG00000033634	Nat8f2	Cml2	N-acetyltransferase 8 (GCN5-related) family member 2	protein-coding
1395	chr9	24899168	24899863	+	2.56	8.15	5.59	5.59e-06	Intergenic	Intergenic	-74693	NR_153861	102631612	Mm.410759	NR_153861		E130101E03Rik	-	RIKEN cDNA E130101E03 gene	ncRNA
1396	chr4	101684881	101685186	+	3.07	7.1	4.03	5.62e-06	Intergenic	Intergenic	-32374	NM_146146	16847	Mm.259282	NM_010704	ENSMUSG00000057722	Lepr	LEPROT|Leprb|Modb1|OB-RGRP|Obr|db|diabetes|obese-like|obl	leptin receptor	protein-coding
1397	chr6	55402171	55402926	+	2.7	7.9	5.21	5.63e-06	intron (NR_046179, intron 1 of 3)	intron (NR_046179, intron 1 of 3)	5661	NR_046179	330324	Mm.113703	NR_046179	ENSMUSG00000108228	6430584L05Rik	6430584L05	RIKEN cDNA 6430584L05 gene	ncRNA
1398	chr3	136426606	136427175	+	2.66	7.74	5.07	5.68e-06	Intergenic	Intergenic	22459	NR_040592	70055	Mm.261063	NR_040592	ENSMUSG00000099508	1700030L20Rik	-	RIKEN cDNA 1700030L20 gene	ncRNA
1399	chr5	38902570	38903451	+	2.37	8.32	5.95	5.68e-06	Intergenic	Intergenic	-26317	NM_013748	27278	Mm.440845	NM_013748	ENSMUSG00000039315	Clnk	MIST	cytokine-dependent hematopoietic cell linker	protein-coding
1400	chr16	20032016	20032944	+	1.65	9.47	7.82	5.68e-06	Intergenic	Intergenic	-49431	NM_183390	239743	Mm.86699	NM_183390	ENSMUSG00000043008	Klhl6	-	kelch-like 6	protein-coding
1401	chr7	137742222	137742860	+	2.93	7.71	4.77	5.7e-06	Intergenic	Intergenic	304867	NR_033611	620016	Mm.388932	NR_033611	ENSMUSG00000100863	Gm12669	-	glutaredoxin 3 pseudogene	pseudo
1402	chr7	98783305	98784973	+	1.99	9.01	7.02	5.7e-06	Intergenic	Intergenic	-50973	NM_001285792	22411	Mm.22182	NM_009519	ENSMUSG00000015957	Wnt11	-	wingless-type MMTV integration site family, member 11	protein-coding
1403	chr9	68199754	68200369	+	2.7	7.3	4.6	5.71e-06	Intergenic	Intergenic	-174347	NR_045745	434412	Mm.490707	NR_045745	ENSMUSG00000111841	Gm20745	-	predicted gene, 20745	ncRNA
1404	chr11	111735524	111735813	+	3.32	6.64	3.32	5.73e-06	Intergenic	Intergenic	669504	NM_008425	16518	Mm.4951	NM_008425	ENSMUSG00000041695	Kcnj2	IRK1|Kcnf1|Kir2.1	potassium inwardly-rectifying channel, subfamily J, member 2	protein-coding
1405	chr4	65477135	65477502	+	2.51	7.62	5.11	5.73e-06	intron (NM_207109, intron 19 of 22)	intron (NM_207109, intron 19 of 22)	-127668	NM_001161782	69807	Mm.22786	NM_053084	ENSMUSG00000051675	Trim32	1810045E12Rik|3f3|BBS11|Zfp117	tripartite motif-containing 32	protein-coding
1406	chr16	33594009	33594988	+	1.93	8.72	6.79	5.73e-06	intron (NM_001083902, intron 5 of 11)	intron (NM_001083902, intron 5 of 11)	75903	NM_001083902	171286	Mm.35253	NM_134251	ENSMUSG00000035506	Slc12a8	CCC9|E330020C02Rik	solute carrier family 12 (potassium/chloride transporters), member 8	protein-coding
1407	chr2	91324512	91325299	+	2.72	7.54	4.82	5.78e-06	intron (NM_175123, intron 3 of 8)	intron (NM_175123, intron 3 of 8)	59790	NM_023854	77038	Mm.43636	NM_023854	ENSMUSG00000027255	Arfgap2	2310032E02Rik|Zfp289	ADP-ribosylation factor GTPase activating protein 2	protein-coding
1408	chr4	108024208	108025010	+	2.29	8.32	6.02	5.78e-06	intron (NM_001285958, intron 5 of 12)	intron (NM_001285958, intron 5 of 12)	6377	NM_001285956	242608	Mm.74710	NM_172874	ENSMUSG00000028600	Podn	9430070G18|Pcan|SLRR5A	podocan	protein-coding
1409	chr11	107016919	107017215	+	3.85	6.3	2.45	5.79e-06	Intergenic	RMER6A|LTR|ERVK	-11156	NM_001163473	69066	Mm.40679	NM_001163473	ENSMUSG00000078607	1810010H24Rik	-	RIKEN cDNA 1810010H24 gene	protein-coding
1410	chr4	101363283	101363603	+	3.44	7.35	3.92	5.79e-06	intron (NR_040640, intron 1 of 3)	ID4|SINE|ID	-7195	NR_040708	77866	Mm.137053	NR_040708	ENSMUSG00000086782	E130102H24Rik	-	RIKEN cDNA E130102H24 gene	ncRNA
1411	chr1	134753644	134754264	+	2.44	7.75	5.31	5.79e-06	TTS (NM_009307)	TTS (NM_009307)	44654	NM_001355726	20980	Mm.5102	NM_009307	ENSMUSG00000026452	Syt2	IP4BP|R74640|mKIAA4194|sytII	synaptotagmin II	protein-coding
1412	chr6	146207174	146207904	+	-1.98	6.23	8.21	5.79e-06	intron (NM_019923, intron 45 of 56)	intron (NM_019923, intron 45 of 56)	273417	NM_010656	16651	Mm.49689	NM_010656	ENSMUSG00000030255	Sspn	Krag	sarcospan	protein-coding
1413	chr17	88106433	88106839	+	2.7	7	4.3	5.81e-06	Intergenic	L2|LINE|L2	-18876	NM_001190356	225058	Mm.312053	NM_001190356		Gm4832	EG225058	predicted gene 4832	protein-coding
1414	chr12	111663781	111664714	+	2.26	8.62	6.36	5.81e-06	Intergenic	Intergenic	8091	NM_021273	12709	Mm.16831	NM_021273	ENSMUSG00000001270	Ckb	B-CK|Bck|CPK-B|Ck-3|Ck3|Ckbb	creatine kinase, brain	protein-coding
1415	chr7	82423635	82424000	+	3.18	7.16	3.98	5.83e-06	intron (NM_001190374, intron 3 of 29)	L3|LINE|CR1	88123	NM_001190374	269959	Mm.65306	NM_001190374	ENSMUSG00000070469	Adamtsl3	9230119C12Rik|C130057K09|mKIAA1233	ADAMTS-like 3	protein-coding
1416	chr1	173622288	173622793	+	2.38	7.5	5.12	5.84e-06	Intergenic	Intergenic	-8319	NM_175026	236312	Mm.447	NM_175026	ENSMUSG00000043263	Ifi209	4930422C14|AI447904|Ifix|Pyhin-1|Pyhin1	interferon activated gene 209	protein-coding
1417	chr10	30088976	30089745	+	2.07	8.17	6.1	5.91e-06	Intergenic	Intergenic	111180	NM_001109747	66311	Mm.251779	NM_001109747	ENSMUSG00000075266	Cenpw	2610036L11Rik|Cug2	centromere protein W	protein-coding
1418	chr3	82234077	82234686	+	3.07	7.5	4.43	5.92e-06	Intergenic	MTD-int|LTR|ERVL-MaLR	-88435	NM_021896	60596	Mm.143831	NM_021896	ENSMUSG00000033910	Gucy1a1	1200016O07Rik|GCS-alpha-1|GCS-alpha-3|Gucy1a3|sGC-alpha1	guanylate cyclase 1, soluble, alpha 1	protein-coding
1419	chr3	60845349	60845811	+	2.7	7.7	4.99	5.93e-06	Intergenic	Intergenic	-157205	NM_008772	18441	Mm.281452	NM_008772	ENSMUSG00000027765	P2ry1	P2Y1	purinergic receptor P2Y, G-protein coupled 1	protein-coding
1420	chr7	80457077	80457738	+	2.29	8.45	6.17	5.96e-06	intron (NM_001042527, intron 21 of 21)	intron (NM_001042527, intron 21 of 21)	-51971	NM_001081454	18550	Mm.5241	NM_011046	ENSMUSG00000030530	Furin	9130404I01Rik|Fur|PACE|Pcsk3|SPC1	furin (paired basic amino acid cleaving enzyme)	protein-coding
1421	chr12	46138517	46139041	+	2.81	7.08	4.26	6.01e-06	Intergenic	Intergenic	679996	NM_021361	664883	Mm.247195	NM_021361	ENSMUSG00000021047	Nova1	9430099M15Rik|G630039L02|Nova-1	neuro-oncological ventral antigen 1	protein-coding
1422	chr9	48604945	48605548	+	2.1	8.11	6.01	6.01e-06	promoter-TSS (NM_010924)	promoter-TSS (NM_010924)	-123	NM_001311062	18113	Mm.8362	NM_010924	ENSMUSG00000032271	Nnmt	-	nicotinamide N-methyltransferase	protein-coding
1423	chr12	81841023	81841461	+	3.04	7.46	4.43	6.04e-06	Intergenic	RMER6A|LTR|ERVK	-18788	NM_018814	54604	Mm.86584	NM_018814	ENSMUSG00000021140	Pcnx	2900024E21Rik|3526401J03Rik|AF096286|AI327143|AI413187|Pcnx1|Pcnxl1	pecanex homolog	protein-coding
1424	chr7	36317572	36318361	+	2.55	8.05	5.5	6.05e-06	Intergenic	Intergenic	-380152	NM_172298	243931	Mm.44141	NM_172298	ENSMUSG00000021217	Tshz3	A630038G13Rik|Tsh3|Zfp537|mKIAA1474|teashirt3	teashirt zinc finger family member 3	protein-coding
1425	chr2	7241539	7242540	+	2.12	8.65	6.53	6.05e-06	intron (NM_001110232, intron 1 of 15)	intron (NM_001110232, intron 1 of 15)	153961	NM_001110232	14007	Mm.398543	NM_010160	ENSMUSG00000002107	Celf2	B230218O03|B230345P09Rik|C88023|CELF-2|CUG-BP2|Cugbp2|D230046B21Rik|Etr-3|Napor|Napor-2|mETR-3	CUGBP, Elav-like family member 2	protein-coding
1426	chr14	48189381	48189636	+	2.82	7.46	4.64	6.06e-06	intron (NM_033602, intron 2 of 5)	intron (NM_033602, intron 2 of 5)	-9208	NR_003630	624367	Mm.445185	NM_001037921	ENSMUSG00000021846	Gm6498	EG624367	glyceraldehyde-3-phosphate dehydrogenase pseudogene	pseudo
1427	chr1	54729407	54729677	+	3.11	7.14	4.03	6.08e-06	intron (NM_001081433, intron 14 of 27)	intron (NM_001081433, intron 14 of 27)	-171858	NM_001163314	241062	Mm.103539	NM_175508	ENSMUSG00000073678	Pgap1	5033403E17Rik|9030223K07Rik|A530084K22|D230012E17Rik|oto	post-GPI attachment to proteins 1	protein-coding
1428	chr8	44347432	44348057	+	2.8	7.62	4.82	6.08e-06	Intergenic	Intergenic	-602464	NM_001081286	14107	Mm.27365	NM_001081286	ENSMUSG00000070047	Fat1	2310038E12Rik|AU023433|Fath|mFat1	FAT atypical cadherin 1	protein-coding
1429	chr16	37440604	37441149	+	2.62	7.51	4.89	6.08e-06	Intergenic	Intergenic	-55918	NM_001114612	207227	Mm.80170	NM_172440	ENSMUSG00000022829	Stxbp5l	9430094L02|A830015P08Rik|LLGL4|T2dm1|t2md1|tomosyn-2	syntaxin binding protein 5-like	protein-coding
1430	chr11	32364386	32364931	+	2.42	7.89	5.47	6.08e-06	intron (NM_177364, intron 1 of 12)	intron (NM_177364, intron 1 of 12)	16847	NM_177364	268396	Mm.227616	NM_177364	ENSMUSG00000040711	Sh3pxd2b	G431001E03Rik|TSK4|fad49	SH3 and PX domains 2B	protein-coding
1431	chr3	98106589	98107179	+	2.54	7.68	5.14	6.09e-06	intron (NM_010928, intron 11 of 33)	intron (NM_010928, intron 11 of 33)	-53750	NM_027665	71078	Mm.50711	NM_027665	ENSMUSG00000043468	Adam30	4933424D07Rik|svph4	a disintegrin and metallopeptidase domain 30	protein-coding
1432	chr13	56383389	56383761	+	3.28	6.92	3.65	6.1e-06	Intergenic	Intergenic	20675	NR_046061	100038494	Mm.370447	NR_046061	ENSMUSG00000074885	Gm10782	-	predicted gene 10782	ncRNA
1433	chr10	71007959	71008316	+	2.9	7.66	4.75	6.1e-06	intron (NM_031397, intron 3 of 20)	intron (NM_031397, intron 3 of 20)	151553	NM_001347189	83675	Mm.286834	NM_031397	ENSMUSG00000014329	Bicc1	Bic-C|bpk|jcpk	BicC family RNA binding protein 1	protein-coding
1434	chr17	90999805	91000329	+	2.42	7.3	4.88	6.11e-06	intron (NM_001346957, intron 1 of 18)	intron (NM_001346957, intron 1 of 18)	89538	NM_001346957	18189	Mm.478418	NM_020252	ENSMUSG00000024109	Nrxn1	1700062G21Rik|9330127H16Rik|A230068P09Rik|mKIAA0578	neurexin I	protein-coding
1435	chr2	84770496	84770819	+	3.06	7.18	4.12	6.12e-06	intron (NM_009776, intron 4 of 7)	intron (NM_009776, intron 4 of 7)	4772	NM_009776	12258	Mm.38888	NM_009776	ENSMUSG00000023224	Serping1	C1INH|C1nh	serine (or cysteine) peptidase inhibitor, clade G, member 1	protein-coding
1436	chr2	102464063	102464421	+	3.4	6.57	3.17	6.13e-06	Intergenic	Intergenic	-12450	NM_010218	14221	Mm.29730	NM_010218	ENSMUSG00000075012	Fjx1	-	four jointed box 1	protein-coding
1437	chr12	71481435	71481800	+	2.93	7.15	4.22	6.13e-06	Intergenic	Intergenic	-58990	NR_045941	73815	Mm.416916	NR_045941	ENSMUSG00000113630	4930404H11Rik	-	RIKEN cDNA 4930404H11 gene	ncRNA
1438	chr4	105394392	105394670	+	3.54	6.59	3.05	6.14e-06	Intergenic	HAL1ME|LINE|L1	237184	NM_080555	67916	Mm.348326	NM_080555	ENSMUSG00000028517	Plpp3	1110003O22Rik|2610002D05Rik|AV025606|D4Bwg0538e|D4Bwg1535e|Lpp3|Ppab2b|Ppap2b	phospholipid phosphatase 3	protein-coding
1439	chr5	54343018	54343348	+	2.81	6.89	4.08	6.14e-06	Intergenic	Intergenic	-6809	NR_038045	330086	Mm.254449	NM_177871	ENSMUSG00000105912	Gm10440	D130065D13	predicted gene 10440	ncRNA
1440	chr4	150794278	150794811	+	2.3	8.02	5.72	6.14e-06	Intergenic	Intergenic	-59252	NM_001356323	74155	Mm.318841	NM_133753	ENSMUSG00000028967	Errfi1	1300002F13Rik|AI788755|Mig-6|Mig6|RALT	ERBB receptor feedback inhibitor 1	protein-coding
1441	chr11	116493587	116495197	+	1.99	9.32	7.33	6.23e-06	Intergenic	Intergenic	-4046	NM_026364	67763	Mm.25125	NM_026364	ENSMUSG00000015869	Prpsap1	5730409F23Rik|PAP39	phosphoribosyl pyrophosphate synthetase-associated protein 1	protein-coding
1442	chr4	55661845	55662546	+	-2.29	5.68	7.97	6.23e-06	Intergenic	Intergenic	-129720	NM_010637	16600	Mm.4325	NM_010637	ENSMUSG00000003032	Klf4	EZF|Gklf|Zie	Kruppel-like factor 4 (gut)	protein-coding
1443	chr13	97774914	97775523	+	2.28	8.16	5.87	6.26e-06	Intergenic	Intergenic	24106	NR_152263	111365222	Mm.440079	NR_152263		Eyelinc18	-	uncharacterized EyeLinc18	ncRNA
1444	chr16	24120879	24121191	+	3.32	6.84	3.52	6.28e-06	Intergenic	Charlie1b|DNA|hAT-Charlie	-38345	NR_155457	108168278	Mm.417246	NR_155457		Gm46545	-	predicted gene, 46545	ncRNA
1445	chr14	25795606	25796130	+	2.58	7.91	5.33	6.29e-06	Intergenic	HAL1|LINE|L1	-27012	NM_001101433	71918	Mm.41904	NM_001101433	ENSMUSG00000055538	Zcchc24	2310047A01Rik	zinc finger, CCHC domain containing 24	protein-coding
1446	chr13	97853313	97854155	+	1.59	9.3	7.71	6.32e-06	Intergenic	Intergenic	102622	NR_152263	111365222	Mm.440079	NR_152263		Eyelinc18	-	uncharacterized EyeLinc18	ncRNA
1447	chr9	71319798	71320508	+	2.47	7.71	5.24	6.35e-06	Intergenic	L2c|LINE|L2	104364	NM_009022	19378	Mm.42016	NM_009022	ENSMUSG00000013584	Aldh1a2	AV116159|Aldh1a7|Raldh1|Raldh2	aldehyde dehydrogenase family 1, subfamily A2	protein-coding
1448	chr8	13640326	13640973	+	2.47	8.24	5.76	6.45e-06	intron (NM_009025, intron 1 of 23)	intron (NM_009025, intron 1 of 23)	36938	NM_009025	19414	Mm.18517	NM_009025	ENSMUSG00000031453	Rasa3	AI326412|C86362|E130011G04|GAPIII|hlb381|scat	RAS p21 protein activator 3	protein-coding
1449	chr9	52800309	52801096	+	2.47	7.93	5.46	6.45e-06	Intergenic	Intergenic	120839	NR_045333	382139	Mm.335162	NR_045333	ENSMUSG00000111020	Gm1715	-	predicted gene 1715	ncRNA
1450	chrX	114816293	114816719	+	3.19	6.58	3.39	6.55e-06	Intergenic	Intergenic	-88506	NM_001276396	237009	Mm.302216	NM_207241	ENSMUSG00000050435	Ube2dnl1	Ube2dnl	ubiquitin-conjugating enzyme E2D N-terminal like 1	protein-coding
1451	chr13	53275870	53276110	+	3.76	6.44	2.67	6.62e-06	intron (NM_013846, intron 1 of 8)	intron (NM_013846, intron 1 of 8)	10119	NM_013846	26564	Mm.342774	NM_013846	ENSMUSG00000021464	Ror2	Ntrkr2	receptor tyrosine kinase-like orphan receptor 2	protein-coding
1452	chrX	166198281	166198684	+	2.99	7.32	4.33	6.62e-06	Intergenic	Intergenic	28028	NM_001310724	237221	Mm.209490	NM_146238	ENSMUSG00000040621	Gemin8	B130034M20Rik|B930082C09Rik|BC023488|gemin-8	gem nuclear organelle associated protein 8	protein-coding
1453	chr16	29745527	29745843	+	2.87	7.14	4.27	6.63e-06	Intergenic	Intergenic	166351	NM_133752	74143	Mm.274285	NM_133752	ENSMUSG00000038084	Opa1	1200011N24Rik|AI225888|AI847218|lilr3|mKIAA0567	OPA1, mitochondrial dynamin like GTPase	protein-coding
1454	chr5	43517201	43517854	+	2.3	7.91	5.61	6.63e-06	intron (NM_001135172, intron 1 of 2)	intron (NM_001135172, intron 1 of 2)	1958	NM_001135172	109323	Mm.275553	NM_175425	ENSMUSG00000061535	C1qtnf7	5530401N20Rik|8430425G24Rik|Ctrp7	C1q and tumor necrosis factor related protein 7	protein-coding
1455	chr17	4355535	4356180	+	3.06	6.96	3.9	6.64e-06	Intergenic	Intergenic	-233755	NR_045462	78043	Mm.398313	NR_045462		4930548J01Rik	1700113K09Rik	RIKEN cDNA 4930548J01 gene	ncRNA
1456	chr4	123699234	123699967	+	2.35	7.74	5.39	6.67e-06	Intergenic	Tigger7|DNA|TcMar-Tigger	-15240	NM_001199137	11426	Mm.402299	NM_009600	ENSMUSG00000028649	Macf1	ABP620|Acf7|Aclp7|MACF|R74989|mKIAA0465	microtubule-actin crosslinking factor 1	protein-coding
1457	chr3	102454534	102454962	+	2.94	6.99	4.05	6.69e-06	Intergenic	Intergenic	-15171	NM_013609	18049	Mm.1259	NM_013609	ENSMUSG00000027859	Ngf	Ngfb|beta-NGF	nerve growth factor	protein-coding
1458	chr6	88388977	88389272	+	2.58	7.41	4.83	6.7e-06	intron (NM_023060, intron 1 of 6)	intron (NM_023060, intron 1 of 6)	57415	NR_149744	65967	Mm.333237	NM_023060	ENSMUSG00000033216	Eefsec	Selb|mSelB|sec	eukaryotic elongation factor, selenocysteine-tRNA-specific	protein-coding
1459	chr7	118478717	118479818	+	2.05	9.69	7.63	6.7e-06	Intergenic	Intergenic	12708	NM_001033380	319622	Mm.323386	NM_001033380	ENSMUSG00000095115	Itpripl2	C130081G24|E030018N11Rik	inositol 1,4,5-triphosphate receptor interacting protein-like 2	protein-coding
1460	chr13	63998627	63999077	+	2.92	7.22	4.3	6.71e-06	Intergenic	Intergenic	90349	NM_008291	15487	Mm.5109	NM_008291	ENSMUSG00000033122	Hsd17b3	-	hydroxysteroid (17-beta) dehydrogenase 3	protein-coding
1461	chr1	119246961	119247520	+	2.77	7.81	5.04	6.71e-06	Intergenic	Intergenic	175008	NM_008381	16324	Mm.3092	NM_008381	ENSMUSG00000037035	Inhbb	-	inhibin beta-B	protein-coding
1462	chr7	34317719	34318678	+	2.01	8.6	6.58	6.71e-06	Intergenic	Intergenic	-32589	NM_172741	233103	Mm.491097	NM_172741	ENSMUSG00000066571	4931406P16Rik	AA553327|mKIAA0355	RIKEN cDNA 4931406P16 gene	protein-coding
1463	chr12	4285184	4285580	+	3.04	7.1	4.06	6.73e-06	intron (NM_010881, intron 13 of 22)	intron (NM_010881, intron 13 of 22)	51355	NM_001204912	69709	Mm.250552	NM_001204912	ENSMUSG00000096199	Ptrhd1	2410017P09Rik	peptidyl-tRNA hydrolase domain containing 1	protein-coding
1464	chr5	102253829	102254149	+	3.25	7.18	3.93	6.76e-06	Intergenic	Intergenic	-184068	NM_172882	72145	Mm.332522	NM_172882	ENSMUSG00000043940	Wdfy3	2610509D04Rik|ALFY|AW319683|B930017C24|BWF1|Bchs|D5Ertd66e|Ggtb3|ZFYVE25|mKIAA0993	WD repeat and FYVE domain containing 3	protein-coding
1465	chr2	84851030	84851666	+	2.22	8.79	6.57	6.78e-06	intron (NM_001081349, intron 5 of 14)	intron (NM_001081349, intron 5 of 14)	10722	NM_001083809	72401	Mm.22716	NM_024497	ENSMUSG00000027075	Slc43a1	2610016F07Rik|AA986141|Lat3|PB39|Pov1|R00504	solute carrier family 43, member 1	protein-coding
1466	chr8	68178967	68179272	+	2.96	6.98	4.02	6.8e-06	Intergenic	Intergenic	-97409	NM_028182	72281	Mm.40974	NM_028182	ENSMUSG00000053886	Sh2d4a	2210402M20Rik|SH2A	SH2 domain containing 4A	protein-coding
1467	chr1	133685673	133686378	+	1.75	9.04	7.29	6.85e-06	intron (NM_001159649, intron 2 of 5)	intron (NM_001159649, intron 2 of 5)	3991	NM_172842	240754	Mm.36534	NM_172842	ENSMUSG00000051998	Lax1	A530029E09|E430019B13Rik	lymphocyte transmembrane adaptor 1	protein-coding
1468	chr18	38126672	38127866	+	-2.02	6.92	8.94	6.86e-06	Intergenic	Intergenic	82493	NM_029357	75599	Mm.36560	NM_029357	ENSMUSG00000051375	Pcdh1	2010005A06Rik|AI585920	protocadherin 1	protein-coding
1469	chr16	87635874	87636300	+	2.88	7.86	4.98	6.87e-06	Intergenic	Intergenic	-62867	NM_007520	12013	Mm.26147	NM_007520	ENSMUSG00000025612	Bach1	6230421P05Rik|AI323795	BTB and CNC homology 1, basic leucine zipper transcription factor 1	protein-coding
1470	chr15	68795277	68796024	+	2.78	7.59	4.82	6.9e-06	Intergenic	Intergenic	-82665	NR_155443	105245971	Mm.380365	NR_155443	ENSMUSG00000069996	Gm41341	-	predicted gene, 41341	ncRNA
1471	chr3	28467827	28468280	+	-2.35	4.84	7.19	6.91e-06	intron (NM_026910, intron 2 of 32)	intron (NM_026910, intron 2 of 32)	48110	NR_130342	100628591		NR_130342	ENSMUSG00000092990	Mir466q	Mir446q|mmu-mir-466q|mu-mir-446q	microRNA 466q	ncRNA
1472	chr3	102445417	102447275	+	2.13	9.27	7.14	6.92e-06	Intergenic	Intergenic	-23573	NM_013609	18049	Mm.1259	NM_013609	ENSMUSG00000027859	Ngf	Ngfb|beta-NGF	nerve growth factor	protein-coding
1473	chr2	181676918	181678095	+	-2.06	7.12	9.17	6.93e-06	Intergenic	Intergenic	-2791	NM_001356343	21400	Mm.24245	NM_009326	ENSMUSG00000059540	Tcea2	AI326274|S-II-T1|SII-T1|Tceat	transcription elongation factor A (SII), 2	protein-coding
1474	chr10	116205602	116207073	+	-2.12	7.07	9.19	6.94e-06	intron (NM_001358484, intron 5 of 12)	intron (NM_001358484, intron 5 of 12)	28986	NM_001161840	19279	Mm.336316	NM_011217	ENSMUSG00000020151	Ptprr	Gmcp1|PTP-SL|PTPBR7|RPTPRR|mPTP213	protein tyrosine phosphatase, receptor type, R	protein-coding
1475	chr10	86425673	86426263	+	2.21	7.88	5.67	6.96e-06	intron (NM_013722, intron 3 of 13)	intron (NM_013722, intron 3 of 13)	72928	NM_013722	27204	Mm.394931	NM_013722	ENSMUSG00000059602	Syn3	-	synapsin III	protein-coding
1476	chr4	150775907	150776631	+	2.54	8	5.46	7.04e-06	Intergenic	Intergenic	-77527	NM_001356323	74155	Mm.318841	NM_133753	ENSMUSG00000028967	Errfi1	1300002F13Rik|AI788755|Mig-6|Mig6|RALT	ERBB receptor feedback inhibitor 1	protein-coding
1477	chr17	33898167	33898592	+	2.51	7.33	4.82	7.04e-06	Intergenic	RLTR42-int|LTR|ERVK	-6756	NR_040470	474160	Mm.206186	NR_040470	ENSMUSG00000092349	Platr17	-	pluripotency associated transcript 17	ncRNA
1478	chr8	11913258	11914057	+	2.49	7.52	5.04	7.04e-06	Intergenic	Intergenic	73136	NM_029326	75528	Mm.440342	NM_029326	ENSMUSG00000031512	Tex29	1700018L24Rik	testis expressed 29	protein-coding
1479	chr8	26848142	26849945	+	2.13	8.84	6.7	7.04e-06	Intergenic	Intergenic	-24620	NR_045904	72316	Mm.490534	NR_045904	ENSMUSG00000100335	2310008N11Rik	-	RIKEN cDNA 2310008N11 gene	ncRNA
1480	chr1	77754325	77754738	+	-2.47	4.69	7.16	7.04e-06	Intergenic	Intergenic	-239443	NM_007936	13838	Mm.400747	NM_007936	ENSMUSG00000026235	Epha4	2900005C20Rik|AI385584|Cek8|Hek8|Sek|Sek1|Tyro1|rb	Eph receptor A4	protein-coding
1481	chr8	114832193	114832711	+	2.92	7.26	4.34	7.12e-06	intron (NM_019573, intron 8 of 8)	intron (NM_019573, intron 8 of 8)	392800	NM_019573	80707	Mm.440420	NM_019573	ENSMUSG00000004637	Wwox	5330426P09Rik|9030416C10Rik|WOX1	WW domain-containing oxidoreductase	protein-coding
1482	chr15	35912146	35912413	+	3.29	6.74	3.44	7.15e-06	intron (NM_177151, intron 56 of 61)	intron (NM_177151, intron 56 of 61)	25967	NM_053071	12864	Mm.548	NM_053071	ENSMUSG00000014313	Cox6c	-	cytochrome c oxidase subunit VIc	protein-coding
1483	chr9	20810214	20810774	+	2.78	7.04	4.26	7.29e-06	intron (NM_016919, intron 1 of 66)	intron (NM_016919, intron 1 of 66)	4573	NM_001317388	53867	Mm.334994	NM_016919	ENSMUSG00000004098	Col5a3	-	collagen, type V, alpha 3	protein-coding
1484	chr7	99359710	99360890	+	1.96	9.82	7.87	7.31e-06	Intergenic	Intergenic	-7061	NM_001111044	12406	Mm.22708	NM_009825	ENSMUSG00000070436	Serpinh1	BERF-1|Cbp1|Cbp2|Hsp47|J6|Serpinh2|gp46	serine (or cysteine) peptidase inhibitor, clade H, member 1	protein-coding
1485	chr9	66232152	66232463	+	2.98	7.03	4.05	7.39e-06	intron (NM_010019, intron 4 of 11)	intron (NM_010019, intron 4 of 11)	74081	NM_010019	13143	Mm.304472	NM_010019	ENSMUSG00000032380	Dapk2	-	death-associated protein kinase 2	protein-coding
1486	chr9	98726668	98727015	+	2.61	7.18	4.56	7.4e-06	Intergenic	Intergenic	93246	NR_045332	331011	Mm.271554	NR_045332	ENSMUSG00000102013	E330023G01Rik	E330023G01	RIKEN cDNA E330023G01 gene	ncRNA
1487	chr7	134167594	134167988	+	3.68	6.58	2.9	7.41e-06	intron (NM_007400, intron 2 of 22)	intron (NM_007400, intron 2 of 22)	57306	NM_007400	11489	Mm.439714	NM_007400	ENSMUSG00000054555	Adam12	Mltna	a disintegrin and metallopeptidase domain 12 (meltrin alpha)	protein-coding
1488	chr3	49667513	49668110	+	2.56	7.68	5.12	7.42e-06	Intergenic	Intergenic	89505	NM_130448	73173	Mm.87246	NM_130448	ENSMUSG00000037892	Pcdh18	3110038E07Rik|BB095589|PCDH68L	protocadherin 18	protein-coding
1489	chr2	45512851	45513351	+	2.75	7.65	4.91	7.45e-06	Intergenic	Intergenic	-183504	NR_040497	69405	Mm.396184	NR_040497	ENSMUSG00000086202	1700019E08Rik	-	RIKEN cDNA 1700019E08 gene	ncRNA
1490	chr18	62939714	62940380	+	2.49	8.05	5.57	7.45e-06	intron (NM_133237, intron 3 of 4)	intron (NM_133237, intron 3 of 4)	17720	NM_133237	494504	Mm.391102	NM_133237	ENSMUSG00000071847	Apcdd1	AB023957|AU041258|Drapc1|EIG180	adenomatosis polyposis coli down-regulated 1	protein-coding
1491	chr5	118143137	118144102	+	2.04	8.86	6.82	7.45e-06	intron (NM_172721, intron 1 of 10)	intron (NM_172721, intron 1 of 10)	11839	NM_172721	231672	Mm.221769	NM_172721	ENSMUSG00000032867	Fbxw8	4930438M06Rik|FBW6|FBW8|FBXO29|Fbx29	F-box and WD-40 domain protein 8	protein-coding
1492	chr14	102811133	102812094	+	2.38	8.32	5.94	7.46e-06	Intergenic	Intergenic	171019	NR_039592	100628599		NR_039592	ENSMUSG00000092901	Mir5130	mir-5130|mmu-mir-5130|mu-mir-5130	microRNA 5130	ncRNA
1493	chr14	32091080	32091522	+	2.81	7.68	4.87	7.49e-06	intron (NM_145460, intron 1 of 7)	intron (NM_145460, intron 1 of 7)	5573	NM_145460	218885	Mm.202257	NM_145460	ENSMUSG00000021906	Oxnad1	2410002F01Rik|AW492292|BC019806	oxidoreductase NAD-binding domain containing 1	protein-coding
1494	chr19	9945774	9946379	+	2.3	7.63	5.34	7.49e-06	Intergenic	B3|SINE|B2	-34524	NR_073181	14319	Mm.1776	NM_010239	ENSMUSG00000024661	Fth1	FHC|Fth|HFt|MFH	ferritin heavy polypeptide 1	protein-coding
1495	chr12	111386004	111387561	+	-1.75	7.62	9.38	7.5e-06	Intergenic	Intergenic	-9064	NM_183016	217866	Mm.27397	NM_183016	ENSMUSG00000021279	Cdc42bpb	MRCKb	CDC42 binding protein kinase beta	protein-coding
1496	chr11	80152325	80153154	+	3	8.22	5.22	7.54e-06	Intergenic	Intergenic	-1423	NM_172133	216991	Mm.341520	NM_172133	ENSMUSG00000020709	Adap2	Centa2	ArfGAP with dual PH domains 2	protein-coding
1497	chr2	4445638	4446850	+	1.99	8.99	7	7.54e-06	intron (NM_001177843, intron 2 of 23)	intron (NM_001177843, intron 2 of 23)	45268	NM_001177843	209630	Mm.37932	NM_172475	ENSMUSG00000026657	Frmd4a	2700017I06Rik|5330420J21|AI594879|C230040M21Rik|Frmd4|Gm13190|mKIAA1294	FERM domain containing 4A	protein-coding
1498	chr2	102986860	102987704	+	2.32	8.23	5.91	7.56e-06	Intergenic	Intergenic	-85617	NM_009851	12505	Mm.423621	NM_009851	ENSMUSG00000005087	Cd44	AU023126|AW121933|AW146109|HERMES|Ly-24|Pgp-1	CD44 antigen	protein-coding
1499	chr12	79735233	79736247	+	2.31	8.24	5.94	7.57e-06	intron (NM_009014, intron 8 of 10)	intron (NM_009014, intron 8 of 10)	188993	NR_131075	77290	Mm.395042	NR_131073	ENSMUSG00000112765	9430078K24Rik	-	RIKEN cDNA 9430078K24 gene	ncRNA
1500	chr8	68865962	68866678	+	1.89	9.06	7.17	7.57e-06	Intergenic	Intergenic	-14235	NM_008509	16956	Mm.1514	NM_008509	ENSMUSG00000015568	Lpl	-	lipoprotein lipase	protein-coding
1501	chr13	41476235	41476909	+	-2.54	5.64	8.18	7.57e-06	intron (NM_001111324, intron 1 of 7)	intron (NM_001111324, intron 1 of 7)	10788	NM_001111324	18003	Mm.288980	NM_017464	ENSMUSG00000021365	Nedd9	Cas-L|CasL|HEF1|MEF1|Nedd-9|p105	neural precursor cell expressed, developmentally down-regulated gene 9	protein-coding
1502	chr2	16365943	16366409	+	2.65	7.46	4.82	7.58e-06	intron (NM_026162, intron 1 of 13)	intron (NM_026162, intron 1 of 13)	9872	NM_026162	67448	Mm.313938	NM_026162	ENSMUSG00000026748	Plxdc2	1200007L24Rik|5430431D22Rik|AI646728|AU022916|AV231634|Tem7r	plexin domain containing 2	protein-coding
1503	chr2	178795619	178796267	+	2.78	7.85	5.07	7.61e-06	Intergenic	Intergenic	365428	NM_198656	381409	Mm.330860	NM_198656	ENSMUSG00000039155	Cdh26	Gm1010	cadherin-like 26	protein-coding
1504	chr18	69243516	69244066	+	2.54	8.05	5.51	7.61e-06	Intergenic	Intergenic	-100701	NM_013685	21413	Mm.4269	NM_013685	ENSMUSG00000053477	Tcf4	5730422P05Rik|ASP-I2|E2-2|E2.2|ITF-2|ITF-2b|ITF2|ME2|MITF-2A|MITF-2B|SEF-2|SEF2|SEF2-1|TFE|Tcf-4|bHLHb19	transcription factor 4	protein-coding
1505	chr1	75586770	75587157	+	2.9	7.17	4.27	7.67e-06	Intergenic	Intergenic	40501	NM_001357150	20536	Mm.5053	NM_009208	ENSMUSG00000006576	Slc4a3	A930038D23Rik|Ae3	solute carrier family 4 (anion exchanger), member 3	protein-coding
1506	chr9	89842112	89842942	+	2.47	8.04	5.57	7.68e-06	intron (NR_040735, intron 3 of 5)	intron (NR_040735, intron 3 of 5)	16008	NR_040735	74700	Mm.159306	NR_040735	ENSMUSG00000098627	4930524O08Rik	-	RIKEN cDNA 4930524O08 gene	ncRNA
1507	chr2	168513911	168514642	+	2.22	7.78	5.56	7.68e-06	intron (NM_001291173, intron 5 of 8)	intron (NM_001291173, intron 5 of 8)	76089	NM_001291179	18019	Mm.116802	NM_010899	ENSMUSG00000027544	Nfatc2	AI607462|NF-ATc2|NF-ATp|NFAT1|NFAT1-D|Nfatp	nuclear factor of activated T cells, cytoplasmic, calcineurin dependent 2	protein-coding
1508	chr6	30945886	30946387	+	3.2	6.9	3.69	7.69e-06	Intergenic	L2a|LINE|L2	12854	NM_001135093	619665	Mm.204671	NM_001135093	ENSMUSG00000073209	Klf14	5330411L03Rik|AL022736|BTEB5	Kruppel-like factor 14	protein-coding
1509	chr13	34612382	34612821	+	2.49	7.32	4.82	7.69e-06	Intergenic	Intergenic	40080	NM_025831	66895	Mm.28943	NM_025831	ENSMUSG00000021411	Pxdc1	1300014I06Rik	PX domain containing 1	protein-coding
1510	chr4	40800758	40801470	+	2.23	8.46	6.23	7.69e-06	Intergenic	Intergenic	-43229	NM_021535	74255	Mm.289929	NM_021535	ENSMUSG00000028409	Smu1	2600001O03Rik|2610203K23Rik|AB044414|AI845086|AW556129|Bwd	smu-1 suppressor of mec-8 and unc-52 homolog (C. elegans)	protein-coding
1511	chr5	36377298	36377976	+	2.21	7.91	5.71	7.69e-06	intron (NM_030889, intron 1 of 26)	intron (NM_030889, intron 1 of 26)	20502	NM_030889	81840	Mm.34113	NM_030889	ENSMUSG00000029093	Sorcs2	N28137|mKIAA1329	sortilin-related VPS10 domain containing receptor 2	protein-coding
1512	chr3	142940818	142942128	+	1.94	8.88	6.94	7.69e-06	Intergenic	Intergenic	58978	NR_152127	320229	Mm.187582	NR_152127		9530052C20Rik	-	RIKEN cDNA 9530052C20 gene	ncRNA
1513	chr2	27773966	27775231	+	1.87	9.31	7.44	7.69e-06	Intergenic	Intergenic	64015	NM_001290482	20181	Mm.24624	NM_011305	ENSMUSG00000015846	Rxra	9530071D11Rik|Nr2b1|RXRalpha1	retinoid X receptor alpha	protein-coding
1514	chr4	137954963	137955449	+	1.94	8.82	6.88	7.75e-06	intron (NM_199307, intron 15 of 19)	Charlie1a|DNA|hAT-Charlie	-38250	NM_001256198	230861	Mm.268903	NM_172703	ENSMUSG00000028760	Eif4g3	1500002J22Rik|4930523M17Rik|G1-419-52|eIF4GII|repro8	eukaryotic translation initiation factor 4 gamma, 3	protein-coding
1515	chr2	10788541	10788864	+	2.72	7.12	4.4	7.76e-06	Intergenic	UCON29|DNA|PiggyBac?	270547	NR_035418	100316831		NR_035418	ENSMUSG00000080594	Mir669h	Mirn669h|mir-669h|mmu-mir-669h	microRNA 669h	ncRNA
1516	chr11	82032083	82033515	+	1.9	9.32	7.42	7.76e-06	Intergenic	Intergenic	-2778	NM_011333	20296	Mm.290320	NM_011333	ENSMUSG00000035385	Ccl2	AI323594|HC11|JE|MCAF|MCP-1|MCP1|SMC-CF|Scya2|Sigje	chemokine (C-C motif) ligand 2	protein-coding
1517	chr15	78960111	78960655	+	2.55	7.71	5.15	7.79e-06	intron (NM_001039156, intron 6 of 24)	intron (NM_001039156, intron 6 of 24)	12659	NM_001039155	110253	Mm.123714	NM_138579	ENSMUSG00000033088	Triobp	AI428493|EST478828|Tara|mKIAA1662	TRIO and F-actin binding protein	protein-coding
1518	chr5	44494172	44494976	+	-2.11	5.5	7.61	7.79e-06	intron (NM_001359071, intron 5 of 7)	intron (NM_001359071, intron 5 of 7)	-267968	NM_173764	231225	Mm.30688	NM_173764	ENSMUSG00000046985	Tapt1	4932414K18Rik	transmembrane anterior posterior transformation 1	protein-coding
1519	chr14	67637577	67637993	+	3.84	6.38	2.53	7.82e-06	Intergenic	L3|LINE|CR1	77825	NM_001110162	108912	Mm.33831	NM_175384	ENSMUSG00000048922	Cdca2	2610311M19Rik|AI586158	cell division cycle associated 2	protein-coding
1520	chr19	16016191	16016532	+	3.24	7.14	3.89	7.82e-06	Intergenic	Intergenic	31286	NR_045355	100502653	Mm.149980	NR_045355	ENSMUSG00000097557	C130060C02Rik	-	RIKEN cDNA C130060C02 gene	ncRNA
1521	chr1	90843659	90844227	+	2.59	7.7	5.11	7.84e-06	promoter-TSS (NM_001243008)	promoter-TSS (NM_001243008)	28	NM_001243009	12835	Mm.7562	NM_009935	ENSMUSG00000048126	Col6a3	AI507288|Col6a-3	collagen, type VI, alpha 3	protein-coding
1522	chr2	168016051	168016716	+	2.55	8.06	5.51	7.84e-06	Intergenic	Intergenic	-5790	NM_001080708	69553	Mm.68454	NM_001080708	ENSMUSG00000074577	Ripor3	2310033K02Rik|Fam65c|Gm124	RIPOR family member 3	protein-coding
1523	chr9	121959790	121960588	+	2.61	7.68	5.06	7.86e-06	intron (NM_001199927, intron 1 of 4)	intron (NM_001199927, intron 1 of 4)	9169	NM_001199927	245050	Mm.71062	NM_177743	ENSMUSG00000038233	Fam198a	C730027P07Rik	family with sequence similarity 198, member A	protein-coding
1524	chr1	71767154	71767431	+	2.88	7.02	4.14	7.89e-06	Intergenic	Intergenic	113957	NR_040308	100042814	Mm.405775	NR_040308	ENSMUSG00000073652	Apol7d	Gm15456	apolipoprotein L 7d	ncRNA
1525	chr18	13499071	13499905	+	2.25	8.12	5.87	7.89e-06	Intergenic	Intergenic	473245	NM_145492	225207	Mm.40325	NM_145492	ENSMUSG00000024420	Zfp521	B930086A16Rik|Evi3|Znf521	zinc finger protein 521	protein-coding
1526	chr11	20958198	20958763	+	-2.13	5.8	7.92	7.89e-06	Intergenic	Intergenic	-127372	NM_173752	216551	Mm.76694	NM_173752	ENSMUSG00000042363	Lgalsl	1110067D22Rik|A530071M23|Grpa|Hspc159|Lgalsla	lectin, galactoside binding-like	protein-coding
1527	chr12	55385882	55386326	+	2.79	7.06	4.27	7.92e-06	intron (NM_001310583, intron 1 of 6)	intron (NM_001310583, intron 1 of 6)	1882	NM_001310583	26443	Mm.30210	NM_011968	ENSMUSG00000021024	Psma6	IOTA	proteasome (prosome, macropain) subunit, alpha type 6	protein-coding
1528	chr4	105916590	105916868	+	3.44	6.52	3.07	7.96e-06	Intergenic	Intergenic	-324484	NR_151521	105244641	Mm.404914	NR_151521		Gm12724	-	predicted gene 12724	ncRNA
1529	chr12	31812415	31812815	+	3.39	6.89	3.5	7.96e-06	intron (NM_001163126, intron 10 of 22)	MERVL_2A-int|LTR|ERVL	-98689	NM_175191	73010	Mm.441517	NM_175191	ENSMUSG00000044067	Gpr22	2900068K05Rik|AW061316	G protein-coupled receptor 22	protein-coding
1530	chr13	51022928	51023153	+	2.96	6.81	3.85	7.96e-06	Intergenic	Intergenic	77687	NR_029463	77428	Mm.405630	NR_029463		9430083A17Rik	-	RIKEN cDNA 9430083A17 gene	ncRNA
1531	chr14	64637467	64637772	+	2.76	7.51	4.75	7.96e-06	Intergenic	Intergenic	-14912	NM_001081177	16554	Mm.23611	NM_001081177	ENSMUSG00000060012	Kif13b	5330429L19Rik|6030414C01|AI429803|C130021D12Rik|GAKIN	kinesin family member 13B	protein-coding
1532	chr14	72389697	72390186	+	2.55	8.11	5.56	7.96e-06	Intergenic	Intergenic	320062	NM_207636	319448	Mm.205421	NM_207636	ENSMUSG00000033487	Fndc3a	1700094E19Rik|D14Ertd453e|F730017H24Rik|Fndc3|sys	fibronectin type III domain containing 3A	protein-coding
1533	chr10	16620982	16621597	+	2.4	7.45	5.05	7.96e-06	Intergenic	Intergenic	474493	NR_038020	100504235	Mm.84044	NR_038020	ENSMUSG00000101969	Gm20125	-	predicted gene, 20125	ncRNA
1534	chr3	39219882	39221007	+	-1.95	7.38	9.33	7.98e-06	Intergenic	Intergenic	333504	NM_183221	329628	Mm.316210	NM_183221	ENSMUSG00000046743	Fat4	6030410K14Rik|9430004M15	FAT atypical cadherin 4	protein-coding
1535	chr4	125145096	125145587	+	2.47	7.46	4.99	8.05e-06	Intergenic	Intergenic	-17460	NM_153159	230738	Mm.402	NM_153159	ENSMUSG00000042677	Zc3h12a	BC036563|MCPIP|MCPIP-1|Mcpip1|Reg1	zinc finger CCCH type containing 12A	protein-coding
1536	chr4	6679166	6679763	+	2.56	7.91	5.35	8.06e-06	Intergenic	Intergenic	-225193	NM_010945	18201	Mm.3059	NM_010945	ENSMUSG00000028245	Nsmaf	AA959567|C630007J05|Fan	neutral sphingomyelinase (N-SMase) activation associated factor	protein-coding
1537	chr1	90490235	90490730	+	-2.33	5.88	8.21	8.06e-06	Intergenic	Intergenic	-112943	NM_133805	108679	Mm.119177	NM_133805	ENSMUSG00000034432	Cops8	9430009J09Rik|AA408242|Csn8|Sgn8	COP9 signalosome subunit 8	protein-coding
1538	chr7	92322355	92322657	+	3.54	6.48	2.94	8.09e-06	intron (NM_011807, intron 14 of 22)	intron (NM_011807, intron 14 of 22)	87536	NM_001243047	23859	Mm.147213	NM_011807	ENSMUSG00000052572	Dlg2	A330103J02Rik|B230218P12Rik|B330007M19Rik|Dlgh2|Gm1197|Gm21505|PSD93	discs large MAGUK scaffold protein 2	protein-coding
1539	chr2	75341702	75342195	+	2.6	7.37	4.77	8.09e-06	Intergenic	Intergenic	102231	NR_040635	77269	Mm.389278	NR_040635		9430019J16Rik	-	RIKEN cDNA 9430019J16 gene	ncRNA
1540	chr8	48309090	48310061	+	2.57	7.89	5.31	8.11e-06	intron (NM_001145937, intron 12 of 26)	intron (NM_001145937, intron 12 of 26)	199562	NM_001161515	320685	Mm.121549	NM_178788	ENSMUSG00000031562	Dctd	6030466N05Rik	dCMP deaminase	protein-coding
1541	chr13	101879051	101879872	+	2.66	7.96	5.3	8.12e-06	Intergenic	Intergenic	-111244	NM_001077495	18708	Mm.259333	NM_001024955	ENSMUSG00000041417	Pik3r1	PI3K|p50alpha|p55alpha|p85alpha	phosphoinositide-3-kinase regulatory subunit 1	protein-coding
1542	chr12	116109370	116110324	+	2.3	7.82	5.52	8.13e-06	intron (NM_009511, intron 4 of 12)	intron (NM_009511, intron 4 of 12)	32121	NM_009511	22355	Mm.395245	NM_009511	ENSMUSG00000011171	Vipr2	VPAC2|VPAC2R|Vip2	vasoactive intestinal peptide receptor 2	protein-coding
1543	chr3	130986145	130986439	+	3.26	6.87	3.61	8.16e-06	Intergenic	Intergenic	-124005	NM_001276402	16842	Mm.255219	NM_010703	ENSMUSG00000027985	Lef1	3000002B05|AI451430|Lef-1	lymphoid enhancer binding factor 1	protein-coding
1544	chr14	30405427	30406196	+	2.69	8.25	5.56	8.25e-06	intron (NM_028981, intron 1 of 46)	intron (NM_028981, intron 1 of 46)	-52225	NR_131095	77710	Mm.410773	NR_131095		4831407H17Rik	-	RIKEN cDNA 4831407H17 gene	ncRNA
1545	chr9	44637583	44637996	+	3.34	6.95	3.61	8.28e-06	3' UTR (NM_181324, exon 14 of 14)	3' UTR (NM_181324, exon 14 of 14)	32897	NM_001110826	13209	Mm.267061	NM_007841	ENSMUSG00000032097	Ddx6	1110001P04Rik|C430015D01Rik|E230023J21Rik|HLR2|mRCK/P54|p54|rck	DEAD (Asp-Glu-Ala-Asp) box polypeptide 6	protein-coding
1546	chr17	57230836	57231923	+	2.13	8.32	6.19	8.28e-06	Intergenic	RSINE1|SINE|B4	-3243	NM_009778	12266	Mm.19131	NM_009778	ENSMUSG00000024164	C3	AI255234|ASP|HSE-MSF|Plp	complement component 3	protein-coding
1547	chr19	21383422	21384574	+	-2.24	6.11	8.35	8.28e-06	Intergenic	MTD|LTR|ERVL-MaLR	88663	NM_010266	14544	Mm.45054	NM_010266	ENSMUSG00000058624	Gda	AU015411|AW047581|GAH	guanine deaminase	protein-coding
1548	chr9	64532799	64533183	+	3.91	6.58	2.67	8.31e-06	intron (NM_172522, intron 4 of 22)	intron (NM_172522, intron 4 of 22)	147365	NM_172522	214058	Mm.127721	NM_172522	ENSMUSG00000036466	Megf11	2410080H04Rik|D130061K05	multiple EGF-like-domains 11	protein-coding
1549	chr12	80318889	80319388	+	-2.38	5.19	7.58	8.35e-06	Intergenic	Intergenic	-58757	NM_001346669	109711	Mm.253564	NM_134156	ENSMUSG00000015143	Actn1	3110023F10Rik|Actn1a	actinin, alpha 1	protein-coding
1550	chr18	14330509	14332107	+	1.53	10.03	8.5	8.36e-06	Intergenic	Intergenic	99002	NR_045373	74529	Mm.400519	NR_045373		8430422H06Rik	-	RIKEN cDNA 8430422H06 gene	ncRNA
1551	chr5	102613557	102613947	+	3.27	6.75	3.49	8.42e-06	intron (NM_029270, intron 2 of 9)	intron (NM_029270, intron 2 of 9)	132361	NM_146161	231532	Mm.440191	NM_029270	ENSMUSG00000057315	Arhgap24	0610025G21Rik	Rho GTPase activating protein 24	protein-coding
1552	chr5	104236738	104237199	+	2.54	7.48	4.94	8.45e-06	Intergenic	Intergenic	34351	NM_016779	13406	Mm.199008	NM_016779	ENSMUSG00000029307	Dmp1	AG1|AV020965|DMP-1|Dmp|PP	dentin matrix protein 1	protein-coding
1553	chr11	111735920	111736263	+	2.42	7.43	5	8.47e-06	Intergenic	Intergenic	669927	NM_008425	16518	Mm.4951	NM_008425	ENSMUSG00000041695	Kcnj2	IRK1|Kcnf1|Kir2.1	potassium inwardly-rectifying channel, subfamily J, member 2	protein-coding
1554	chr3	51380404	51380978	+	-2.09	5.46	7.55	8.48e-06	Intergenic	B2_Mm1a|SINE|B2	15856	NM_026358	67749	Mm.273339	NM_026358	ENSMUSG00000037161	Mgarp	4930583H14Rik|AI195347|CESP-1|HUMMR|Osap|Qsap	mitochondria localized glutamic acid rich protein	protein-coding
1555	chr9	25177129	25177601	+	2.52	7.79	5.26	8.49e-06	Intergenic	LTR105_Mam|LTR|ERVL	-25584	NM_020586	80517	Mm.142843	NM_020586	ENSMUSG00000008429	Herpud2	5031400M07Rik|AB041580	HERPUD family member 2	protein-coding
1556	chr17	67514100	67515251	+	-2.16	6.79	8.95	8.5e-06	Intergenic	Intergenic	114657	NR_155516	102640031	Mm.421441	NR_155516		Gm36201	-	predicted gene, 36201	ncRNA
1557	chr17	14309877	14310210	+	3.43	6.63	3.2	8.56e-06	intron (NM_022315, intron 1 of 12)	intron (NM_022315, intron 1 of 12)	30537	NM_022315	64074	Mm.30162	NM_022315	ENSMUSG00000023886	Smoc2	1700056C05Rik|5430426J21Rik|Smoc2l	SPARC related modular calcium binding 2	protein-coding
1558	chr10	37342747	37343155	+	3.39	6.73	3.34	8.56e-06	Intergenic	MLT1K|LTR|ERVL-MaLR	-204025	NM_008538	17118	Mm.30059	NM_008538	ENSMUSG00000069662	Marcks	Macs|PKCSL	myristoylated alanine rich protein kinase C substrate	protein-coding
1559	chr7	82203122	82203452	+	-3.06	3.38	6.43	8.56e-06	intron (NM_001277954, intron 1 of 8)	intron (NM_001277954, intron 1 of 8)	28491	NM_017400	20408	Mm.736	NM_017400	ENSMUSG00000030638	Sh3gl3	EEN-B2|SH3P13|Sh3d2c|Sh3d2c2	SH3-domain GRB2-like 3	protein-coding
1560	chr2	65378342	65378770	+	3.02	7.61	4.59	8.58e-06	Intergenic	Intergenic	-14156	NR_105755	102466151		NR_105755	ENSMUSG00000099184	Mir6337	Gm27877|mmu-mir-6337	microRNA 6337	ncRNA
1561	chr4	65269938	65270444	+	2.73	7.39	4.65	8.59e-06	intron (NM_021362, intron 10 of 21)	intron (NM_021362, intron 10 of 21)	146017	NM_021362	18491	Mm.317854	NM_021362	ENSMUSG00000028370	Pappa	8430414N03Rik|IGFBP-4ase|PAG1|PAPP-A	pregnancy-associated plasma protein A	protein-coding
1562	chr3	109309024	109310270	+	1.91	8.92	7.01	8.59e-06	Intergenic	Intergenic	-31036	NM_020505	57257	Mm.282257	NM_020505	ENSMUSG00000033721	Vav3	A530094I06Rik|AA986410|Idd18.1	vav 3 oncogene	protein-coding
1563	chr17	56169799	56170813	+	-2.21	6.55	8.77	8.6e-06	intron (NM_025566, intron 1 of 1)	intron (NM_025566, intron 1 of 1)	7815	NM_025566	66443	Mm.2312	NM_025566	ENSMUSG00000044469	Tnfaip8l1	2600017J23Rik|TIPE1	tumor necrosis factor, alpha-induced protein 8-like 1	protein-coding
1564	chr10	90953158	90953733	+	2.94	7.38	4.44	8.71e-06	intron (NM_181398, intron 8 of 9)	intron (NM_181398, intron 8 of 9)	123602	NM_001347053	77531	Mm.440605	NM_181398	ENSMUSG00000058589	Anks1b	AIDA-1|AIDA-1b|C030032C09Rik|E530015N03Rik|EB-1|Gm10937|Gm1555	ankyrin repeat and sterile alpha motif domain containing 1B	protein-coding
1565	chr18	4838850	4839189	+	2.77	7.16	4.39	8.71e-06	intron (NR_045881, intron 5 of 9)	intron (NR_045881, intron 5 of 9)	26533	NR_045881	100038439	Mm.387569	NR_045881	ENSMUSG00000097043	Gm10556	-	predicted gene 10556	ncRNA
1566	chr2	110426910	110427380	+	2.75	7.5	4.75	8.71e-06	Intergenic	Intergenic	-64152	NM_026271	67606	Mm.291809	NM_026271	ENSMUSG00000074971	Fibin	1110018M03Rik	fin bud initiation factor homolog (zebrafish)	protein-coding
1567	chr8	83048862	83050310	+	1.79	9.08	7.29	8.72e-06	intron (NM_177378, intron 6 of 6)	intron (NM_177378, intron 6 of 6)	-115766	NM_001111304	71310	Mm.24031	NM_027758	ENSMUSG00000031709	Tbc1d9	4933431N12Rik|AI847101|AW490653|C76116	TBC1 domain family, member 9	protein-coding
1568	chr7	79907461	79907735	+	2.78	7.21	4.43	8.75e-06	intron (NM_009682, intron 4 of 5)	intron (NM_009682, intron 4 of 5)	13042	NM_009682	11778	Mm.220173	NM_009682	ENSMUSG00000063801	Ap3s2	[s]3B	adaptor-related protein complex 3, sigma 2 subunit	protein-coding
1569	chr3	54480334	54480724	+	2.78	6.78	4	8.76e-06	Intergenic	Intergenic	119422	NM_001313899	50706	Mm.236067	NM_015784	ENSMUSG00000027750	Postn	A630052E07Rik|AI747096|OSF-2|Osf2|PLF|PN	periostin, osteoblast specific factor	protein-coding
1570	chr9	120777507	120778839	+	-1.95	7.43	9.38	8.79e-06	Intergenic	B4A|SINE|B4	137077	NR_040742	76402	Mm.436588	NR_040742	ENSMUSG00000100146	1700020M21Rik	-	RIKEN cDNA 1700020M21 gene	ncRNA
1571	chr15	53901269	53903005	+	-1.37	7.89	9.26	8.85e-06	intron (NM_177225, intron 1 of 4)	intron (NM_177225, intron 1 of 4)	299	NM_177225	320679	Mm.442455	NM_177225	ENSMUSG00000058656	Samd12	A830094I09Rik	sterile alpha motif domain containing 12	protein-coding
1572	chr15	4796796	4797293	+	2.71	7.9	5.18	8.87e-06	intron (NM_016704, intron 14 of 15)	intron (NM_016704, intron 14 of 15)	69834	NM_016704	12274	Mm.20247	NM_016704	ENSMUSG00000022181	C6	AW111623	complement component 6	protein-coding
1573	chr6	120629074	120629326	+	2.96	7.22	4.26	8.89e-06	Intergenic	Intergenic	-37221	NM_001128151	330409	Mm.333357	NM_001128151	ENSMUSG00000071226	Cecr2	2610101O16Rik|2810409N01Rik|Gtl4|mKIAA1740	CECR2, histone acetyl-lysine reader	protein-coding
1574	chr9	105852066	105852996	+	2.41	7.96	5.56	8.9e-06	Intergenic	Intergenic	-24446	NM_001102607	245026	Mm.482507	NM_172927	ENSMUSG00000043719	Col6a6	E330019B14|E330026B02Rik	collagen, type VI, alpha 6	protein-coding
1575	chr14	67620699	67621669	+	2	8.66	6.66	8.91e-06	Intergenic	Intergenic	94426	NM_001110162	108912	Mm.33831	NM_175384	ENSMUSG00000048922	Cdca2	2610311M19Rik|AI586158	cell division cycle associated 2	protein-coding
1576	chr10	90940214	90940925	+	2.51	7.77	5.26	8.96e-06	intron (NM_181398, intron 6 of 9)	intron (NM_181398, intron 6 of 9)	110726	NM_001347053	77531	Mm.440605	NM_181398	ENSMUSG00000058589	Anks1b	AIDA-1|AIDA-1b|C030032C09Rik|E530015N03Rik|EB-1|Gm10937|Gm1555	ankyrin repeat and sterile alpha motif domain containing 1B	protein-coding
1577	chr4	66482470	66483607	+	1.6	9.59	7.99	8.98e-06	Intergenic	Intergenic	-78555	NM_207109	56079	Mm.445312	NM_019514	ENSMUSG00000028373	Astn2	1d8|Astnl|bM452J22.1	astrotactin 2	protein-coding
1578	chr7	34939213	34939730	+	2.22	7.77	5.55	8.99e-06	intron (NM_008820, intron 4 of 14)	intron (NM_008820, intron 4 of 14)	27064	NM_008820	18624	Mm.69751	NM_008820	ENSMUSG00000063931	Pepd	Pep-4|Pep4|dal	peptidase D	protein-coding
1579	chr1	89139740	89140532	+	-2.04	5.84	7.88	9e-06	intron (NM_133816, intron 3 of 5)	intron (NM_133816, intron 3 of 5)	69721	NM_133816	98402	Mm.170983	NM_133816	ENSMUSG00000036206	Sh3bp4	AI594717|AW227605|BOG25	SH3-domain binding protein 4	protein-coding
1580	chr13	13569318	13569933	+	2.71	7.52	4.81	9.03e-06	Intergenic	Intergenic	-20784	NM_010748	17101	Mm.342337	NM_010748	ENSMUSG00000019726	Lyst	D13Sfk13|beige|bg	lysosomal trafficking regulator	protein-coding
1581	chr2	148192903	148193298	+	2.64	6.99	4.36	9.03e-06	Intergenic	Intergenic	-146131	NM_010446	15376	Mm.938	NM_010446	ENSMUSG00000037025	Foxa2	HNF3-beta|HNF3beta|Hnf-3b|Hnf3b|Tcf-3b|Tcf3b	forkhead box A2	protein-coding
1582	chr2	84022704	84023329	+	2.13	8.52	6.39	9.03e-06	Intergenic	Intergenic	-81790	NM_027964	71861	Mm.116957	NM_027964	ENSMUSG00000034552	Zswim2	1700025P14Rik|4933437F18Rik|MEX	zinc finger SWIM-type containing 2	protein-coding
1583	chr1	52421571	52422583	+	2.05	8.6	6.55	9.03e-06	Intergenic	MER68|LTR|ERVL	78371	NM_008667	17936	Mm.25903	NM_008667	ENSMUSG00000002881	Nab1	-	Ngfi-A binding protein 1	protein-coding
1584	chr4	9284096	9284391	+	2.95	7.09	4.14	9.05e-06	intron (NM_001355183, intron 2 of 5)	intron (NM_001355183, intron 2 of 5)	14926	NM_028940	74438	Mm.473368	NM_028940	ENSMUSG00000041216	Clvs1	4933402J24Rik|Clvl1|Rlbp1l1	clavesin 1	protein-coding
1585	chr9	67574772	67575500	+	2.38	7.47	5.09	9.05e-06	Intergenic	Intergenic	-15433	NM_001081242	70549	Mm.33645	NM_027458	ENSMUSG00000052698	Tln2	5730421P04Rik|AI507121|AI787438|AL118320|mKIAA0320	talin 2	protein-coding
1586	chr9	61618474	61619046	+	1.98	8.23	6.25	9.05e-06	Intergenic	Intergenic	246394	NM_001083927	21887	Mm.24255	NM_009389	ENSMUSG00000032280	Tle3	2610103N05Rik|ESG|Grg3a|Grg3b|mKIAA1547	transducin-like enhancer of split 3	protein-coding
1587	chr10	37193880	37194924	+	2.24	8.27	6.03	9.06e-06	Intergenic	Intergenic	-55476	NM_008538	17118	Mm.30059	NM_008538	ENSMUSG00000069662	Marcks	Macs|PKCSL	myristoylated alanine rich protein kinase C substrate	protein-coding
1588	chr10	66595119	66595475	+	4.11	6.6	2.49	9.09e-06	Intergenic	Intergenic	325087	NR_138561	68488	Mm.338835	NR_138560		1110002J07Rik	-	RIKEN cDNA 1110002J07 gene	ncRNA
1589	chr4	87096088	87096625	+	2.67	7.87	5.2	9.09e-06	intron (NM_172426, intron 2 of 10)	intron (NM_172426, intron 2 of 10)	131607	NM_001110240	76376	Mm.490487	NM_172426	ENSMUSG00000037996	Slc24a2	2810021B17Rik|6330417K15Rik|AI847460|Nckx2	solute carrier family 24 (sodium/potassium/calcium exchanger), member 2	protein-coding
1590	chr3	52452325	52452946	+	-2.02	6.78	8.8	9.09e-06	Intergenic	Intergenic	-64329	NR_153344	102631981	Mm.394225	NR_153344		Gm30173	-	predicted gene, 30173	ncRNA
1591	chr7	105228075	105228497	+	-2.11	6.07	8.19	9.1e-06	Intergenic	Intergenic	-23945	NM_147069	259072	Mm.377823	NM_147069	ENSMUSG00000048425	Olfr686	MOR35-1	olfactory receptor 686	protein-coding
1592	chr13	43159317	43159864	+	2.85	7.04	4.19	9.16e-06	intron (NM_001252639, intron 4 of 7)	intron (NM_001252639, intron 4 of 7)	11911	NM_025935	67046	Mm.269213	NM_025935	ENSMUSG00000021368	Tbc1d7	2610009C09Rik	TBC1 domain family, member 7	protein-coding
1593	chr6	136906211	136907704	+	2.41	9.09	6.68	9.16e-06	TTS (NM_026983)	TTS (NM_026983)	15223	NM_026983	69187	Mm.33692	NM_026983	ENSMUSG00000030219	Erp27	1810033M07Rik|1810047B09Rik	endoplasmic reticulum protein 27	protein-coding
1594	chr12	104560906	104561713	+	1.91	8.13	6.22	9.16e-06	Intergenic	Intergenic	-88073	NM_010351	14836	Mm.129	NM_010351	ENSMUSG00000021095	Gsc	-	goosecoid homeobox	protein-coding
1595	chr1	106583243	106583589	+	3.07	7.12	4.05	9.2e-06	intron (NM_009741, intron 1 of 1)	intron (NM_009741, intron 1 of 1)	-36785	NR_106164	102466254		NR_106164	ENSMUSG00000098344	Mir3473f	Gm27846|mmu-mir-3473f	microRNA 3473f	ncRNA
1596	chr4	101037641	101037973	+	3.49	6.63	3.15	9.21e-06	Intergenic	Intergenic	-31231	NM_183024	242570	Mm.185636	NM_183024	ENSMUSG00000035275	Raver2	A430091O22Rik	ribonucleoprotein, PTB-binding 2	protein-coding
1597	chr6	54021389	54021948	+	-2.4	4.98	7.38	9.21e-06	Intergenic	MTD|LTR|ERVL-MaLR	-18264	NM_001163640	69993	Mm.321147	NM_023543	ENSMUSG00000004633	Chn2	1700026N20Rik|4930557O16Rik|ARHGAP3|Bch	chimerin 2	protein-coding
1598	chr2	15038679	15039459	+	-2.42	5.73	8.15	9.21e-06	intron (NM_001355685, intron 3 of 9)	intron (NM_001355685, intron 3 of 9)	10243	NM_001165942	74455	Mm.478923	NM_028950	ENSMUSG00000026707	Nsun6	4933403D21Rik|4933414E04Rik|NOPD1	NOL1/NOP2/Sun domain family member 6	protein-coding
1599	chr6	108677670	108678214	+	2.52	8.34	5.82	9.27e-06	Intergenic	Intergenic	-17008	NR_104577	75394	Mm.395061	NR_040757	ENSMUSG00000087341	0610040F04Rik	-	RIKEN cDNA 0610040F04 gene	ncRNA
1600	chr19	40725738	40726567	+	2.04	8.23	6.19	9.27e-06	exon (NM_009848, exon 6 of 10)	exon (NM_009848, exon 6 of 10)	66382	NM_009848	12495	Mm.2824	NM_009848	ENSMUSG00000048120	Entpd1	2610206B08Rik|AA408691|Cd39|NTPDase-1	ectonucleoside triphosphate diphosphohydrolase 1	protein-coding
1601	chr10	38882033	38882629	+	2.63	7.99	5.37	9.29e-06	Intergenic	Intergenic	-60552	NM_001177783	215919	Mm.294313	NM_001177783	ENSMUSG00000094311	Rfpl4b	100040915|Gm3037|Gm62	ret finger protein-like 4B	protein-coding
1602	chr18	38517852	38518845	+	2.3	8.32	6.01	9.29e-06	Intergenic	Intergenic	82920	NM_011898	24066	Mm.42038	NM_011898	ENSMUSG00000024427	Spry4	A030006O18Rik|sprouty4	sprouty RTK signaling antagonist 4	protein-coding
1603	chr19	11533885	11534427	+	3.06	7.22	4.16	9.3e-06	Intergenic	RMER19B2|LTR|ERVK	-2693	NM_025658	66607	Mm.441056	NM_025658	ENSMUSG00000024678	Ms4a4d	2210417J23Rik	membrane-spanning 4-domains, subfamily A, member 4D	protein-coding
1604	chr3	54358507	54359064	+	2.41	7.93	5.52	9.3e-06	Intergenic	Intergenic	-2322	NM_001313898	50706	Mm.236067	NM_015784	ENSMUSG00000027750	Postn	A630052E07Rik|AI747096|OSF-2|Osf2|PLF|PN	periostin, osteoblast specific factor	protein-coding
1605	chr13	56359639	56360031	+	3.16	6.83	3.67	9.31e-06	Intergenic	Intergenic	-3065	NR_046061	100038494	Mm.370447	NR_046061	ENSMUSG00000074885	Gm10782	-	predicted gene 10782	ncRNA
1606	chr10	15426812	15427151	+	-2.7	4.35	7.05	9.35e-06	Intergenic	Intergenic	-364796	NR_131087	77538	Mm.128235	NR_131087	ENSMUSG00000112227	C330004P14Rik	-	RIKEN cDNA C330004P14 gene	ncRNA
1607	chr7	81072465	81072921	+	2.24	7.93	5.68	9.38e-06	intron (NM_054085, intron 3 of 13)	intron (NM_054085, intron 3 of 13)	15093	NM_054085	116904	Mm.475768	NM_054085	ENSMUSG00000038763	Alpk3	AW319487|D330016D04|MAK|Midori|mKIAA1330	alpha-kinase 3	protein-coding
1608	chr14	65691340	65691806	+	2.87	6.9	4.03	9.39e-06	intron (NM_001168318, intron 3 of 7)	intron (NM_001168318, intron 3 of 7)	25170	NM_001168318	71145	Mm.83840	NM_028903	ENSMUSG00000022032	Scara5	4932433F15Rik|4933425F03Rik|AV278087|Tesr	scavenger receptor class A, member 5	protein-coding
1609	chr11	97979922	97981215	+	2	8.72	6.72	9.39e-06	intron (NM_001163608, intron 1 of 13)	intron (NM_001163608, intron 1 of 13)	5878	NM_001163608	72324	Mm.39617	NM_028199	ENSMUSG00000017417	Plxdc1	2410003I07Rik|AI848450|Tem7	plexin domain containing 1	protein-coding
1610	chr7	73351441	73352452	+	1.48	9.19	7.71	9.48e-06	intron (NR_040324, intron 1 of 2)	intron (NR_040324, intron 1 of 2)	-23574	NM_177740	244058	Mm.333943	NM_177740	ENSMUSG00000070509	Rgma	BC059072|C230063O06	repulsive guidance molecule family member A	protein-coding
1611	chr17	63655921	63656218	+	3.85	6.3	2.45	9.5e-06	Intergenic	L1_Mur3|LINE|L1	-155489	NM_015794	50758	Mm.136366	NM_015794	ENSMUSG00000023965	Fbxl17	6330576B01Rik|AI452053|BB073797|C130023C01Rik|Fbx13|Fbxo13	F-box and leucine-rich repeat protein 17	protein-coding
1612	chr11	33097946	33099260	+	2.05	8.67	6.62	9.55e-06	Intergenic	Intergenic	48797	NM_008005	14172	Mm.339812	NM_008005	ENSMUSG00000057967	Fgf18	D130055P09Rik|FGF-18	fibroblast growth factor 18	protein-coding
1613	chr11	73022891	73024185	+	1.96	8.52	6.56	9.56e-06	intron (NM_018883, intron 1 of 15)	intron (NM_018883, intron 1 of 15)	4530	NM_018883	55984	Mm.9998	NM_018883	ENSMUSG00000020785	Camkk1	AI846603|CaMKKalpha|Camkk	calcium/calmodulin-dependent protein kinase kinase 1, alpha	protein-coding
1614	chr5	92369119	92369420	+	2.64	7.42	4.78	9.58e-06	intron (NM_001310664, intron 2 of 10)	intron (NM_001310664, intron 2 of 10)	-5973	NR_038116	56066	Mm.131723	NM_019494	ENSMUSG00000060183	Cxcl11	Cxc11|H174|I-tac|Ip9|Itac|Scyb11|Scyb9b|b-R1|betaR1	chemokine (C-X-C motif) ligand 11	protein-coding
1615	chr4	143278398	143278879	+	2.45	7.74	5.29	9.61e-06	intron (NM_010329, intron 1 of 5)	intron (NM_010329, intron 1 of 5)	20926	NM_010329	14726	Mm.2976	NM_010329	ENSMUSG00000028583	Pdpn	E11|Gp38|OTS-8|RANDAM-2|T1-alpha|T1a|T1alpha	podoplanin	protein-coding
1616	chr14	40450818	40451391	+	-2.62	4.95	7.57	9.63e-06	Intergenic	MMERVK9E_I-int|LTR|ERVK	441861	NM_177816	328381	Mm.235694	NM_177816	ENSMUSG00000037833	Sh2d4b	A430109M18Rik|D030001E08	SH2 domain containing 4B	protein-coding
1617	chr1	58101506	58102091	+	2.28	8.3	6.01	9.7e-06	intron (NM_009676, intron 31 of 34)	intron (NM_009676, intron 31 of 34)	-11338	NM_023617	71724	Mm.20108	NM_023617	ENSMUSG00000064294	Aox3	1200011D03Rik|AI326299|Aoh1|Aoh2	aldehyde oxidase 3	protein-coding
1618	chr11	109355751	109356193	+	2.32	7.55	5.23	9.71e-06	non-coding (NR_038097, exon 2 of 2)	non-coding (NR_038097, exon 2 of 2)	-6822	NM_010303	14674	Mm.193925	NM_010303	ENSMUSG00000020611	Gna13	AU024132|AU043124|Galpha13	guanine nucleotide binding protein, alpha 13	protein-coding
1619	chr6	97757265	97757928	+	2.62	7.27	4.65	9.84e-06	Intergenic	Intergenic	-49462	NM_001113198	17342	Mm.333284	NM_008601	ENSMUSG00000035158	Mitf	BCC2|Bhlhe32|Gsfbcc2|Vitiligo|Wh|bw|mi|vit	melanogenesis associated transcription factor	protein-coding
1620	chr17	84611508	84612587	+	2.22	8.4	6.18	9.84e-06	intron (NM_001357987, intron 26 of 28)	intron (NM_001357987, intron 26 of 28)	-14452	NM_172256	213575	Mm.246119	NM_172256	ENSMUSG00000024253	Dync2li1	4933404O11Rik|CGI-60|D2lic|LIC3|mD2LIC	dynein cytoplasmic 2 light intermediate chain 1	protein-coding
1621	chr3	116194686	116195368	+	2.1	8.51	6.42	9.84e-06	Intergenic	Intergenic	58457	NM_022427	64378	Mm.40025	NM_022427	ENSMUSG00000068696	Gpr88	AW061286|Strg	G-protein coupled receptor 88	protein-coding
1622	chr2	29944493	29945392	+	-2.1	6.31	8.41	9.84e-06	intron (NM_028923, intron 9 of 15)	intron (NM_028923, intron 9 of 15)	9533	NM_028923	74412	Mm.275121	NM_028923	ENSMUSG00000019715	Gle1	4933405K21Rik|AA553313|Gle1l	GLE1 RNA export mediator (yeast)	protein-coding
1623	chr1	43245035	43245596	+	2.71	7.74	5.03	9.92e-06	Intergenic	Intergenic	-48554	NM_001289533	14200	Mm.6799	NM_010212	ENSMUSG00000008136	Fhl2	FHL-2|SLIM-3|SLIM3	four and a half LIM domains 2	protein-coding
1624	chr16	56610537	56610911	+	2.86	6.88	4.02	9.93e-06	intron (NM_001014422, intron 18 of 35)	intron (NM_001014422, intron 18 of 35)	106726	NM_001357126	21787	Mm.425970	NM_019678	ENSMUSG00000022757	Tfg	AI173908	Trk-fused gene	protein-coding
1625	chrX	97921931	97922294	+	3.36	6.57	3.2	9.97e-06	Intergenic	Intergenic	-226645	NM_013476	11835	Mm.39005	NM_013476	ENSMUSG00000046532	Ar	AW320017|Tfm	androgen receptor	protein-coding
1626	chr11	64652786	64653182	+	2.84	6.93	4.09	9.99e-06	Intergenic	Intergenic	-216310	NR_028445	654805	Mm.436132	NR_028445		F930015N05Rik	-	RIKEN cDNA F930015N05 gene	ncRNA
1627	chr12	46992400	46992724	+	3.38	6.87	3.49	1e-05	Intergenic	Intergenic	-173787	NM_021361	664883	Mm.247195	NM_021361	ENSMUSG00000021047	Nova1	9430099M15Rik|G630039L02|Nova-1	neuro-oncological ventral antigen 1	protein-coding
1628	chr17	71299902	71300266	+	2.91	7.33	4.42	1e-05	intron (NM_001357337, intron 2 of 7)	intron (NM_001357337, intron 2 of 7)	10927	NM_001357337	246707	Mm.23462	NM_145158	ENSMUSG00000024053	Emilin2	FOAP-10	elastin microfibril interfacer 2	protein-coding
1629	chr7	112304386	112304921	+	2.56	7.33	4.77	1e-05	intron (NM_001193305, intron 4 of 25)	intron (NM_001193305, intron 4 of 25)	-63655	NM_027587	100504195	Mm.291129	NM_027587	ENSMUSG00000030771	Micalcl	4921517J23Rik	MICAL C-terminal like	protein-coding
1630	chr10	21609493	21609895	+	2.56	7.37	4.81	1e-05	intron (NR_027968, intron 2 of 2)	intron (NR_027968, intron 2 of 2)	16549	NR_027968	67692	Mm.54306	NM_183266	ENSMUSG00000050844	1700020N01Rik	-	RIKEN cDNA 1700020N01 gene	ncRNA
1631	chr14	31237039	31237587	+	2.35	7.66	5.31	1e-05	TTS (NM_001360624)	TTS (NM_001360624)	14002	NR_153760	71838	Mm.5348	NM_027949	ENSMUSG00000021902	Phf7	1700006H01Rik|1700010P14Rik|AI427892|AW555949	PHD finger protein 7	protein-coding
1632	chr16	74283316	74283605	+	-2.7	4.51	7.2	1e-05	intron (NM_001358493, intron 2 of 28)	intron (NM_001358493, intron 2 of 28)	58607	NR_030464	751561		NR_030464	ENSMUSG00000104758	Mir691	Mirn691|mir-691|mmu-mir-691	microRNA 691	ncRNA
1633	chr3	78908450	78908964	+	2.42	7.87	5.46	1.01e-05	Intergenic	Intergenic	236180	NM_001310536	76089	Mm.31220	NM_001099624	ENSMUSG00000062232	Rapgef2	5830453M24Rik|CNRasGEF|Pdzgef1|RA-GEF-1|mKIAA0313|nRapGEP	Rap guanine nucleotide exchange factor (GEF) 2	protein-coding
1634	chr11	33800505	33801071	+	2.71	7.43	4.71	1.02e-05	intron (NM_001190885, intron 1 of 8)	L2a|LINE|L2	42797	NM_027398	70357	Mm.252514	NM_027398	ENSMUSG00000053519	Kcnip1	KCHIP1|Kchip1.2	Kv channel-interacting protein 1	protein-coding
1635	chr6	36896632	36897095	+	2.68	7.45	4.76	1.02e-05	intron (NM_001347104, intron 27 of 32)	intron (NM_001347104, intron 27 of 32)	-86684	NM_008973	19242	Mm.279690	NM_008973	ENSMUSG00000029838	Ptn	HARP|HB-GAM|HBBM|HBBN|HBGF-8|HBNF|OSF|Osf-1|Osf1	pleiotrophin	protein-coding
1636	chr5	90086406	90086956	+	2.64	7.3	4.66	1.02e-05	Intergenic	Intergenic	137315	NM_001033310	231430	Mm.319697	NM_001033310	ENSMUSG00000035505	Cox18	BC038311	cytochrome c oxidase assembly protein 18	protein-coding
1637	chr17	70629814	70630373	+	2.58	7.91	5.33	1.02e-05	intron (NM_001347413, intron 2 of 10)	intron (NM_001347413, intron 2 of 10)	68346	NM_001128181	224997	Mm.311840	NM_027712	ENSMUSG00000003279	Dlgap1	4933422O14Rik|9630002F18|AI845682|AI848168|BB075781|D17Bwg0511e|GKAP/SAPAP|GKPA/SAPAP|Gkap|Sapap1|mKIAA4162	DLG associated protein 1	protein-coding
1638	chr11	4297772	4298144	+	2.52	7.63	5.1	1.02e-05	Intergenic	MIR3|SINE|MIR	31162	NM_001039537	16878	Mm.4964	NM_008501	ENSMUSG00000034394	Lif	-	leukemia inhibitory factor	protein-coding
1639	chr11	55427964	55428860	+	1.42	9.28	7.85	1.02e-05	Intergenic	Intergenic	-8332	NM_001290817	20692	Mm.291442	NM_009242	ENSMUSG00000018593	Sparc	BM-40|ON	secreted acidic cysteine rich glycoprotein	protein-coding
1640	chr5	44764642	44765444	+	-2.42	6.04	8.46	1.02e-05	intron (NM_001359071, intron 1 of 7)	intron (NM_001359071, intron 1 of 7)	34703	NM_001347349	16826	Mm.25785	NM_010698	ENSMUSG00000039706	Ldb2	AI035351|AW146358|CLIM1|CLP-36|Ldb3	LIM domain binding 2	protein-coding
1641	chrX	157328372	157328767	+	3	7.12	4.12	1.03e-05	intron (NM_011077, intron 11 of 21)	intron (NM_011077, intron 11 of 21)	86717	NM_011077	18675	Mm.2529	NM_011077	ENSMUSG00000057457	Phex	Gy|HPDR|HPDR1|Hyp|PEX	phosphate regulating endopeptidase homolog, X-linked	protein-coding
1642	chr5	111824473	111825219	+	2.52	8.09	5.57	1.03e-05	Intergenic	Intergenic	-63118	NR_045833	269683	Mm.136946	NM_207252	ENSMUSG00000085271	E130006D01Rik	Gm16018|Gm681	RIKEN cDNA E130006D01 gene	ncRNA
1643	chr10	59814597	59815139	+	2.19	7.94	5.75	1.03e-05	intron (NM_001359267, intron 8 of 11)	Kanga1d|DNA|TcMar-Tc2	-64723	NM_019965	56709	Mm.103610	NM_019965	ENSMUSG00000020109	Dnajb12	Dj10|mDj10	DnaJ heat shock protein family (Hsp40) member B12	protein-coding
1644	chr2	74076865	74077108	+	4.06	6.4	2.34	1.04e-05	Intergenic	Intergenic	-165660	NM_001301722	228033	Mm.2966	NM_175015	ENSMUSG00000018770	Atp5g3	6030447M23	ATP synthase, H+ transporting, mitochondrial F0 complex, subunit C3 (subunit 9)	protein-coding
1645	chr3	103600981	103601434	+	2.76	7.75	4.99	1.04e-05	intron (NM_001276676, intron 3 of 6)	intron (NM_001276676, intron 3 of 6)	25081	NM_001276681	54524	Mm.88818	NM_018800	ENSMUSG00000027849	Syt6	3110037A08Rik|AW048930|sytVI	synaptotagmin VI	protein-coding
1646	chr14	59075929	59076811	+	2.27	7.77	5.5	1.04e-05	Intergenic	Intergenic	66523	NM_026461	67932	Mm.65550	NM_026461	ENSMUSG00000021977	1700129C05Rik	-	RIKEN cDNA 1700129C05 gene	protein-coding
1647	chr10	76622551	76623859	+	1.84	9.25	7.4	1.04e-05	intron (NM_001347207, intron 1 of 27)	intron (NM_001347207, intron 1 of 27)	199	NM_146007	12834	Mm.1949	NM_146007	ENSMUSG00000020241	Col6a2	Col6a-2	collagen, type VI, alpha 2	protein-coding
1648	chr17	84401758	84402202	+	3.25	7.17	3.92	1.05e-05	intron (NM_183021, intron 22 of 37)	intron (NM_183021, intron 22 of 37)	64228	NM_183021	240174	Mm.246767	NM_177826	ENSMUSG00000024251	Thada	6530405K19|A930021O22|AU019899|BC052885|GITA	thyroid adenoma associated	protein-coding
1649	chr7	66365921	66366257	+	2.76	7.45	4.69	1.05e-05	intron (NM_146191, intron 2 of 33)	intron (NM_146191, intron 2 of 33)	15635	NR_106024	102465640		NR_106024	ENSMUSG00000098353	Mir7057	Gm27550|mmu-mir-7057	microRNA 7057	ncRNA
1650	chr5	30047989	30048452	+	-2.62	4.32	6.94	1.05e-05	Intergenic	MMERVK9E_I-int|LTR|ERVK	25405	NR_033402	22171	Mm.268395	NM_021288	ENSMUSG00000025747	Tyms	Ts	thymidylate synthase	protein-coding
1651	chr14	12062598	12062969	+	-2.64	4.35	6.99	1.05e-05	intron (NM_008981, intron 5 of 29)	intron (NM_008981, intron 5 of 29)	-127160	NM_001347593	19270	Mm.431266	NM_008981	ENSMUSG00000021745	Ptprg	5430405N12Rik|AW046354|AW549872|RPTPgamma	protein tyrosine phosphatase, receptor type, G	protein-coding
1652	chr1	189495498	189496306	+	2.46	8.51	6.05	1.06e-05	Intergenic	Intergenic	-93629	NM_001281848	16526	Mm.33304	NM_010607	ENSMUSG00000037624	Kcnk2	A430027H14Rik|AI848635|TREK-1	potassium channel, subfamily K, member 2	protein-coding
1653	chr15	75596353	75599082	+	-1.77	7.51	9.28	1.06e-05	intron (NM_001361294, intron 3 of 3)	intron (NM_001361294, intron 3 of 3)	1087	NM_001361294	68453	Mm.46367	NM_026730	ENSMUSG00000022579	Gpihbp1	1110002J19Rik|GPI-HBP1	GPI-anchored HDL-binding protein 1	protein-coding
1654	chr10	97381710	97382005	+	3.83	6.63	2.8	1.07e-05	Intergenic	Intergenic	-41621	NR_039547	100628616		NR_039547	ENSMUSG00000105557	Mir3966	mmu-mir-3966|mu-mir-3966	microRNA 3966	ncRNA
1655	chr7	37006577	37007209	+	3.02	6.73	3.72	1.07e-05	Intergenic	Intergenic	308775	NM_172298	243931	Mm.44141	NM_172298	ENSMUSG00000021217	Tshz3	A630038G13Rik|Tsh3|Zfp537|mKIAA1474|teashirt3	teashirt zinc finger family member 3	protein-coding
1656	chr4	19484739	19485101	+	2.44	7.32	4.87	1.07e-05	intron (NM_013927, intron 15 of 17)	intron (NM_013927, intron 15 of 17)	85188	NM_027769	70568	Mm.38390	NM_027769	ENSMUSG00000028228	Cpne3	5430428M23Rik|5730450C07Rik|C85108|CPN3	copine III	protein-coding
1657	chr9	68813176	68813855	+	2.31	8.43	6.13	1.07e-05	intron (NM_013646, intron 1 of 10)	intron (NM_013646, intron 1 of 10)	48169	NR_033299	320440	Mm.483129	NM_177159		9530091C08Rik	-	RIKEN cDNA 9530091C08 gene	ncRNA
1658	chr5	18152083	18152579	+	4.06	6.29	2.22	1.08e-05	Intergenic	Intergenic	189761	NM_001081143	242851	Mm.332230	NM_001081143	ENSMUSG00000028777	Gnat3	Ggust|Gtn	guanine nucleotide binding protein, alpha transducing 3	protein-coding
1659	chr14	33808582	33809491	+	2.61	8.28	5.68	1.08e-05	TTS (NR_131114)	TTS (NR_131114)	2247	NR_131113	218902	Mm.107791	NR_131113	ENSMUSG00000115751	4930503F20Rik	4930453C15	RIKEN cDNA 4930503F20 gene	ncRNA
1660	chr2	51844395	51845265	+	2.55	7.87	5.32	1.08e-05	Intergenic	Intergenic	88505	NM_001355607	71684	Mm.28309	NM_030243	ENSMUSG00000036249	Rbm43	0610033I05Rik	RNA binding motif protein 43	protein-coding
1661	chr14	25174368	25174847	+	2.5	7.57	5.07	1.08e-05	Intergenic	Intergenic	-31366	NR_045718	75862	Mm.109191	NR_045718	ENSMUSG00000114916	4930572O13Rik	-	RIKEN cDNA 4930572O13 gene	ncRNA
1662	chr3	79947687	79948439	+	2.38	8.48	6.09	1.08e-05	Intergenic	Intergenic	62133	NM_133187	68659	Mm.427274	NM_133187	ENSMUSG00000027955	Fam198b	1110032E23Rik|2210419I08Rik|AV011458|Ened	family with sequence similarity 198, member B	protein-coding
1663	chr5	44495081	44495711	+	-2.03	5.69	7.71	1.08e-05	intron (NM_001359071, intron 5 of 7)	intron (NM_001359071, intron 5 of 7)	-268790	NM_173764	231225	Mm.30688	NM_173764	ENSMUSG00000046985	Tapt1	4932414K18Rik	transmembrane anterior posterior transformation 1	protein-coding
1664	chr8	95015882	95016423	+	-2.45	4.59	7.04	1.08e-05	Intergenic	Intergenic	-1540	NM_173036	54672	Mm.27995	NM_173036	ENSMUSG00000060470	Adgrg3	A030001G24Rik|AW214383|Gpr97|Pb1|Pb99	adhesion G protein-coupled receptor G3	protein-coding
1665	chr16	89980425	89980670	+	3.72	6.55	2.83	1.09e-05	Intergenic	L2|LINE|L2	-5848	NM_001145886	21844	Mm.310902	NM_009384	ENSMUSG00000002489	Tiam1	AI847750|D16Ium10|D16Ium10e	T cell lymphoma invasion and metastasis 1	protein-coding
1666	chr15	40728859	40729417	+	2.52	8.53	6.01	1.09e-05	intron (NM_001356998, intron 1 of 6)	intron (NM_001356998, intron 1 of 6)	74096	NM_011766	22762	Mm.39496	NM_011766	ENSMUSG00000022306	Zfpm2	B330005D23Rik|FOG-2|FOG2	zinc finger protein, multitype 2	protein-coding
1667	chr2	166459973	166460799	+	2.35	8.23	5.88	1.09e-05	Intergenic	Intergenic	12935	NR_015558	319684	Mm.399746	NR_015558		5031425F14Rik	-	RIKEN cDNA 5031425F14 gene	ncRNA
1668	chr12	55518047	55518667	+	2.26	7.68	5.43	1.09e-05	Intergenic	Intergenic	-25710	NM_010907	18035	Mm.170515	NM_010907	ENSMUSG00000021025	Nfkbia	AI462015|Nfkbi	nuclear factor of kappa light polypeptide gene enhancer in B cells inhibitor, alpha	protein-coding
1669	chr19	22926743	22927554	+	2.24	8.66	6.42	1.09e-05	TTS (NM_001035244)	TTS (NM_001035244)	176543	NR_029591	387200		NR_029591	ENSMUSG00000065507	Mir204	Mirn204|mir-204|mmu-mir-204	microRNA 204	ncRNA
1670	chr2	166463571	166463916	+	2.46	7.32	4.86	1.1e-05	Intergenic	Intergenic	16292	NR_015558	319684	Mm.399746	NR_015558		5031425F14Rik	-	RIKEN cDNA 5031425F14 gene	ncRNA
1671	chr1	194929385	194931169	+	1.89	9.15	7.26	1.1e-05	Intergenic	Intergenic	-8544	NM_001111059	12490	Mm.29798	NM_133654	ENSMUSG00000016494	Cd34	AU040960	CD34 antigen	protein-coding
1672	chr1	150480728	150481216	+	2.68	7.06	4.38	1.11e-05	Intergenic	Intergenic	-14807	NM_001110146	96875	Mm.174256	NM_021400	ENSMUSG00000006014	Prg4	CACP|DOL54|JCAP|MSF|SZP|lubricin	proteoglycan 4 (megakaryocyte stimulating factor, articular superficial zone protein)	protein-coding
1673	chr2	33300460	33301052	+	2.66	7.61	4.95	1.11e-05	intron (NM_001290570, intron 3 of 16)	intron (NM_001290570, intron 3 of 16)	70738	NM_001290570	241308	Mm.274249	NM_175211	ENSMUSG00000038831	Ralgps1	5830418G11Rik|AI853783|AI854138|RALGEF2|RALGPS1A|RalGEF 2|mKIAA0351	Ral GEF with PH domain and SH3 binding motif 1	protein-coding
1674	chr9	35340661	35341537	+	2.33	7.93	5.6	1.11e-05	Intergenic	Intergenic	59994	NR_040715	71133	Mm.158577	NR_040715	ENSMUSG00000111746	4933422A05Rik	-	RIKEN cDNA 4933422A05 gene	ncRNA
1675	chr10	98349176	98349882	+	2.09	8.03	5.94	1.11e-05	intron (NR_045179, intron 1 of 4)	intron (NR_045179, intron 1 of 4)	2338	NR_045179	667438	Mm.414522	NR_045179	ENSMUSG00000112896	Gm8633	EG667438	predicted gene 8633	ncRNA
1676	chr6	117778228	117778977	+	-2.05	5.92	7.98	1.11e-05	Intergenic	Intergenic	-26833	NR_045731	72263	Mm.443289	NR_045731	ENSMUSG00000099869	1700030F04Rik	-	RIKEN cDNA 1700030F04 gene	ncRNA
1677	chr10	6027676	6027862	+	4.38	6.21	1.83	1.12e-05	Intergenic	Intergenic	-105369	NM_019958	56533	Mm.44606	NM_019958	ENSMUSG00000019775	Rgs17	6430507P11Rik|Rgsz2	regulator of G-protein signaling 17	protein-coding
1678	chr7	109480765	109481218	+	2.63	7.51	4.88	1.12e-05	exon (NM_181853, exon 7 of 20)	exon (NM_181853, exon 7 of 20)	12747	NM_001170913	330627	Mm.183528	NM_181853	ENSMUSG00000031026	Trim66	Kiaa0298-hp|Tif1d	tripartite motif-containing 66	protein-coding
1679	chr10	78104476	78105407	+	2.44	8.44	6	1.12e-05	Intergenic	Intergenic	35573	NM_015790	50723	Mm.17819	NM_015790	ENSMUSG00000000732	Icosl	AU044799|B7-H2|B7RP-1|B7h|BG071784|GI50|GL50|GL50-B|ICOS-L|Icoslg|LICOS|Ly115l|mKIAA0653	icos ligand	protein-coding
1680	chr9	96428304	96428981	+	2.26	7.78	5.52	1.12e-05	Intergenic	Intergenic	50033	NM_001311135	19823	Mm.28235	NM_011279	ENSMUSG00000051234	Rnf7	Rbx2|SAG	ring finger protein 7	protein-coding
1681	chr12	100079609	100080335	+	2.18	8.63	6.45	1.12e-05	Intergenic	Intergenic	-32359	NM_008947	19179	Mm.157105	NM_008947	ENSMUSG00000021178	Psmc1	AI325227|P26s4|Rpt2/S4|S4|rpt2	protease (prosome, macropain) 26S subunit, ATPase 1	protein-coding
1682	chr2	103592078	103592889	+	2.1	8.85	6.75	1.12e-05	intron (NM_178890, intron 1 of 16)	intron (NM_178890, intron 1 of 16)	26173	NM_178890	99382	Mm.35850	NM_178890	ENSMUSG00000032724	Abtb2	AW539457|BPOZ-2	ankyrin repeat and BTB (POZ) domain containing 2	protein-coding
1683	chr9	41545514	41546186	+	2.04	8.56	6.52	1.12e-05	intron (NR_131930, intron 3 of 3)	intron (NR_131930, intron 3 of 3)	9134	NR_029726	723965		NR_029726	ENSMUSG00000092770	Mirlet7a-2	Mirnlet7a-2|let-7a-2	microRNA let7a-2	ncRNA
1684	chr8	41074370	41074703	+	3.41	6.75	3.34	1.14e-05	intron (NM_001005863, intron 3 of 13)	intron (NM_001005863, intron 3 of 13)	-19740	NM_001005864	102103	Mm.149438	NM_001005863	ENSMUSG00000045636	Mtus1	AI481402|ATBP135|Atip1|B430010I23Rik|B430305I03Rik|C85752|Cctsg1-440|MD44|MTSG1|mKIAA1288	mitochondrial tumor suppressor 1	protein-coding
1685	chr4	101683083	101683463	+	3.06	7.04	3.98	1.14e-05	Intergenic	Intergenic	-34134	NM_146146	16847	Mm.259282	NM_010704	ENSMUSG00000057722	Lepr	LEPROT|Leprb|Modb1|OB-RGRP|Obr|db|diabetes|obese-like|obl	leptin receptor	protein-coding
1686	chr12	110087899	110088105	+	3.01	6.55	3.54	1.14e-05	Intergenic	Tigger7|DNA|TcMar-Tigger	70071	NR_045466	67280	Mm.390495	NR_045466	ENSMUSG00000113331	3110009F21Rik	-	RIKEN cDNA 3110009F21 gene	ncRNA
1687	chr5	52351777	52352161	+	2.64	7.45	4.81	1.14e-05	Intergenic	Intergenic	-11835	NM_011435	20657	Mm.2407	NM_011435	ENSMUSG00000072941	Sod3	AI314465|EC-SOD	superoxide dismutase 3, extracellular	protein-coding
1688	chr11	112844251	112844877	+	2.63	7.42	4.78	1.14e-05	Intergenic	Intergenic	-19436	NR_130164	76393	Mm.86795	NR_130164		1700012H19Rik	-	RIKEN cDNA 1700012H19 gene	ncRNA
1689	chr16	45030840	45031306	+	2.62	7.29	4.67	1.14e-05	Intergenic	Intergenic	-62938	NM_026439	67896	Mm.181074	NM_026439	ENSMUSG00000022665	Ccdc80	2610001E17Rik|DRO1|Ssg1|Urb	coiled-coil domain containing 80	protein-coding
1690	chr11	54214533	54215315	+	2.02	8.67	6.65	1.14e-05	Intergenic	Intergenic	-1636	NR_045506	71056	Mm.56332	NR_045506	ENSMUSG00000086209	4933405E24Rik	-	RIKEN cDNA 4933405E24 gene	ncRNA
1691	chr4	12418102	12418443	+	2.75	6.98	4.23	1.15e-05	Intergenic	L3|LINE|CR1	-246257	NM_026558	68099	Mm.25340	NM_026558	ENSMUSG00000028218	Fam92a	6720467C03Rik|Fam92a1	family with sequence similarity 92, member A	protein-coding
1692	chr2	139919781	139920293	+	2.27	7.57	5.3	1.15e-05	intron (NR_110352, intron 9 of 12)	intron (NR_110352, intron 9 of 12)	146768	NR_110350	75812	Mm.293449	NM_175225	ENSMUSG00000039033	Tasp1	4930485D02Rik|AW986064	taspase, threonine aspartase 1	protein-coding
1693	chr13	43567178	43567842	+	2.27	7.56	5.29	1.15e-05	Intergenic	Intergenic	-7319	NM_001081059	76137	Mm.426290	NM_001081059	ENSMUSG00000021371	Mcur1	6230416A05Rik|AU015498|AV136929|AW554392|C88263|Ccdc90a	mitochondrial calcium uniporter regulator 1	protein-coding
1694	chr12	117751097	117752311	+	-2.03	6.81	8.84	1.15e-05	intron (NM_175930, intron 26 of 27)	intron (NM_175930, intron 26 of 27)	-92157	NM_146040	217946	Mm.281149	NM_146040	ENSMUSG00000021175	Cdca7l	BC006933|JPO2	cell division cycle associated 7 like	protein-coding
1695	chr2	33283684	33284097	+	2.97	7.51	4.54	1.16e-05	intron (NM_001290570, intron 4 of 16)	intron (NM_001290570, intron 4 of 16)	67929	NM_011923	26360	Mm.208919	NM_011923	ENSMUSG00000004105	Angptl2	AI593246|AW260363|Arp2	angiopoietin-like 2	protein-coding
1696	chr3	144611479	144611989	+	2.73	7.34	4.61	1.16e-05	Intergenic	Intergenic	41307	NM_053102	93684	Mm.29812	NM_053102	ENSMUSG00000037072	Selenof	9430015P09Rik|Sep15	selenoprotein F	protein-coding
1697	chr9	63672620	63673857	+	2.15	8.59	6.43	1.16e-05	intron (NM_016769, intron 1 of 8)	intron (NM_016769, intron 1 of 8)	70592	NR_151671	66939	Mm.34338	NM_025857	ENSMUSG00000037257	Aagab	2310007F21Rik|p34	alpha- and gamma-adaptin binding protein	protein-coding
1698	chr10	67785533	67786030	+	2.47	7.46	4.99	1.17e-05	Intergenic	Intergenic	126881	NM_178679	216049	Mm.268346	NM_178679	ENSMUSG00000037855	Zfp365	AI839779|AV340892|DBZ|Su48|Znf365|talanin	zinc finger protein 365	protein-coding
1699	chr2	31337574	31338431	+	2.16	8.12	5.96	1.17e-05	Intergenic	Intergenic	92079	NM_019681	14299	Mm.249318	NM_019681	ENSMUSG00000062661	Ncs1	9430075O15Rik|A730032G13Rik|AI836659|Freq|Mfreq|NCS-1	neuronal calcium sensor 1	protein-coding
1700	chr2	181662665	181663796	+	-2.14	6.97	9.11	1.18e-05	Intergenic	Intergenic	8410	NM_009236	20672	Mm.264904	NM_009236	ENSMUSG00000046470	Sox18	AI385749|Ra|Ragl	SRY (sex determining region Y)-box 18	protein-coding
1701	chr9	68561731	68562375	+	2.5	7.64	5.14	1.19e-05	Intergenic	Intergenic	-41853	NR_040737	74951	Mm.60678	NR_040737	ENSMUSG00000111303	4930502A04Rik	-	RIKEN cDNA 4930502A04 gene	ncRNA
1702	chr2	125290220	125291017	+	2.11	7.98	5.87	1.19e-05	Intergenic	Intergenic	43103	NM_023595	110074	Mm.282499	NM_023595	ENSMUSG00000027203	Dut	5031412I06Rik|5133400F09Rik|D2Bwg0749e|Dutp|dUTPase	deoxyuridine triphosphatase	protein-coding
1703	chr10	93418660	93419225	+	-2.23	5.32	7.54	1.19e-05	Intergenic	Intergenic	-14165	NR_106161	102465791		NR_106161	ENSMUSG00000098679	Mir7688	Gm27874|mmu-mir-7688	microRNA 7688	ncRNA
1704	chr8	24427412	24428214	+	-2.27	6.6	8.87	1.19e-05	Intergenic	Intergenic	11133	NM_026931	69068	Mm.25775	NM_026931	ENSMUSG00000056313	Tcim	1110065B09Rik|1810011O10Rik|AW121743|AW321058	transcriptional and immune response regulator	protein-coding
1705	chr1	148676123	148676402	+	3.37	6.49	3.11	1.2e-05	Intergenic	ORR1E-int|LTR|ERVL-MaLR	1246177	NM_001305632	18783	Mm.4186	NM_008869	ENSMUSG00000056220	Pla2g4a	Pla2g4|cPLA2|cPLA2-alpha|cPLA2alpha	phospholipase A2, group IVA (cytosolic, calcium-dependent)	protein-coding
1706	chr8	9138986	9139639	+	2.53	8.01	5.48	1.2e-05	Intergenic	Intergenic	-5357	NR_073360	74688	Mm.159298	NR_073360	ENSMUSG00000109215	4930453L07Rik	-	RIKEN cDNA 4930453L07 gene	ncRNA
1707	chr3	132277793	132278070	+	3.76	6.67	2.91	1.21e-05	Intergenic	LTR40c|LTR|ERVL	192639	NM_020265	56811	Mm.103593	NM_020265	ENSMUSG00000028031	Dkk2	-	dickkopf WNT signaling pathway inhibitor 2	protein-coding
1708	chr13	71669768	71670294	+	2.37	7.53	5.16	1.21e-05	Intergenic	UCON26|Unknown|Unknown	293692	NM_010573	16371	Mm.316056	NM_010573	ENSMUSG00000060969	Irx1	-	Iroquois homeobox 1	protein-coding
1709	chr7	109708951	109709733	+	2.33	8.39	6.06	1.21e-05	intron (NM_020616, intron 5 of 5)	intron (NM_020616, intron 5 of 5)	5605	NM_020616	57373	Mm.334138	NM_020616	ENSMUSG00000031023	Akip1	BCA3|C11orf17|D7H11orf17|D930014E17Rik|ICRFP703B1614Q5.6|ORF27	A kinase (PRKA) interacting protein 1	protein-coding
[truncated: 84,940 more rows]

## Sheet: NegUnique_annotations
Analysis Type:	PANTHER Overrepresentation Test (Released 20200728)
[truncated: 349 more rows]

[truncated: 3 more sheets: PosUnique_annotations, HeartShared_NoLung, SharedPeaks_noLung_annotations]
