# Supplementary material for: Cardiac endothelial cells maintain open chromatin and expression of cardiomyocyte myofibrillar genes
Source: eLife journal article supplement (doi:10.7554/elife.55730), 2020-12-14
Supplement: supp [file elife-55730-supp-v1.zip › elife_poa_e55730_Supplementary_file_4.xlsx]

## Sheet: DESEQ2_wAnnotation
PeakID (cmd=annotatePeaks.pl DBA_FreshvCulHeart_EDGER.bed.txt mm10)	Chr	Start	End	Strand	Conc	Conc_Cultured	Conc_Fresh	Fold	p-value	FDR	Peak Score	Focus Ratio/Region Size	Annotation	Detailed Annotation	Distance to TSS	Nearest PromoterID	Entrez ID	Nearest Unigene	Nearest Refseq	Nearest Ensembl	Gene Name	Gene Alias	Gene Description	Gene Type
22172	chrX	160164316	160164680	+	5.57	6.56	-0.32	6.88	1.1e-09	5.8e-09	0	NA	Intergenic	Intergenic	-26068	NM_008810	18597	Mm.34775	NM_008810	ENSMUSG00000031299	Pdha1	Pdha-1	pyruvate dehydrogenase E1 alpha 1	protein-coding
23606	chr18	10946627	10946971	+	5.43	6.42	-0.32	6.74	2.7e-09	1.34e-08	0	NA	Intergenic	Intergenic	-105711	NM_010258	14465	Mm.329287	NM_010258	ENSMUSG00000005836	Gata6	AA410133|GATA-6	GATA binding protein 6	protein-coding
27424	chr6	122689780	122690017	+	5.23	6.21	-0.32	6.53	2.13e-08	9.13e-08	0	NA	Intergenic	B2_Mm2|SINE|B2	-17591	NM_001289831	71950	Mm.6047	NM_028016	ENSMUSG00000012396	Nanog	2410002E02Rik|ENK|ecat4	Nanog homeobox	protein-coding
29345	chr10	100541043	100541308	+	5.04	6.02	-0.32	6.34	5.32e-08	2.13e-07	0	NA	intron (NM_146009	intron 33 of 52)	intron (NM_146009	intron 33 of 52)	48084	NM_175128	68281	Mm.268474	NM_175128	ENSMUSG00000046567	4930430F08Rik	4930571E09Rik|A730088G13Rik|AW551239|C430008C19Rik	RIKEN cDNA 4930430F08 gene	protein-coding
19348	chrX	7146203	7146516	+	5.5	6.48	0.24	6.24	1.55e-10	9.39e-10	0	NA	Intergenic	Intergenic	42355	NM_016691	12728	Mm.486257	NM_016691	ENSMUSG00000004317	Clcn5	5430408K11Rik|ClC-5|Clc4-1|Clc5|Clcn4-1|D930009B12Rik|DXImx42e|Sfc13|T25545	chloride channel	voltage-sensitive 5	protein-coding
30252	chr17	44957559	44957894	+	4.93	5.92	-0.32	6.24	8.03e-08	3.11e-07	0	NA	intron (NM_178652	intron 3 of 11)	intron (NM_178652	intron 3 of 11)	-76841	NM_029257	75341	Mm.386821	NM_029257		4930564C03Rik	-	RIKEN cDNA 4930564C03 gene	protein-coding
30439	chr12	27999195	27999482	+	4.92	5.9	-0.32	6.23	8.74e-08	3.36e-07	0	NA	Intergenic	Intergenic	548999	NM_001177964	68511	Mm.310284	NM_001177964	ENSMUSG00000020633	Dcdc2c	1110015M06Rik	doublecortin domain containing 2C	protein-coding
14923	chr11	83679458	83679831	+	5.84	6.82	0.65	6.17	2.74e-12	2.15e-11	0	NA	Intergenic	RMER17B|LTR|ERVK	17060	NM_013652	20303	Mm.244263	NM_013652	ENSMUSG00000018930	Ccl4	AT744.1|Act-2|MIP-1B|Mip1b|Scya4	chemokine (C-C motif) ligand 4	protein-coding
14456	chr16	15254554	15254987	+	5.76	6.73	0.68	6.06	1.65e-12	1.33e-11	0	NA	Intergenic	Intergenic	339748	NM_023585	70620	Mm.235407	NM_023585	ENSMUSG00000022674	Ube2v2	1110021H13Rik|4632410D19Rik|5730524P06Rik|6820402M05|AI848315|C81524|MMS2	ubiquitin-conjugating enzyme E2 variant 2	protein-coding
15307	chr5	124302865	124303232	+	5.71	6.69	0.65	6.04	4.13e-12	3.17e-11	0	NA	intron (NM_001081323	intron 7 of 21)	URR1B|DNA|hAT-Charlie	24924	NM_001277867	269702	Mm.60224	NM_001081323	ENSMUSG00000038126	Mphosph9	4930548D04Rik|9630025B04Rik|AW413446|AW547060|B930097C17Rik|C87456|MPP-9|MPP9	M-phase phosphoprotein 9	protein-coding
3917	chr1	58374151	58374743	+	6.85	7.83	1.83	6	5.42e-23	1.62e-21	0	NA	intron (NM_001008419	intron 34 of 35)	RLTR48A|LTR|ERV1	-18689	NM_025824	66882	Mm.21848	NM_025824	ENSMUSG00000051223	Bzw1	1200015E15Rik|mKIAA0005	basic leucine zipper and W2 domains 1	protein-coding
9453	chr5	147131923	147132294	+	6.22	7.2	1.23	5.98	1.16e-15	1.44e-14	0	NA	Intergenic	Intergenic	54762	NM_009087	20018	Mm.317557	NM_009087	ENSMUSG00000029642	Polr1d	1110003G10Rik|AC19|RPA16|Rpo1-3	polymerase (RNA) I polypeptide D	protein-coding
1134	chr9	23187103	23187762	+	7.59	8.57	2.6	5.97	2.23e-35	2.31e-33	0	NA	Intergenic	Intergenic	-35644	NM_028472	73230	Mm.335020	NM_028472	ENSMUSG00000031963	Bmper	3110056H04Rik|CV-2|Crim3|Cv2	BMP-binding endothelial regulator	protein-coding
6730	chr17	30847372	30847928	+	6.44	7.42	1.46	5.95	1.91e-18	3.33e-17	0	NA	intron (NM_013811	intron 88 of 92)	intron (NM_013811	intron 88 of 92)	-54217	NM_021332	14652	Mm.390969	NM_021332	ENSMUSG00000024027	Glp1r	GLP-1R|GLP1Rc	glucagon-like peptide 1 receptor	protein-coding
34768	chr5	5253271	5253499	+	4.65	5.63	-0.32	5.95	4.91e-07	1.66e-06	0	NA	intron (NM_011074	intron 2 of 14)	intron (NM_011074	intron 2 of 14)	12683	NM_001310448	18647	Mm.389061	NM_011074	ENSMUSG00000028926	Cdk14	Pftk1|mKIAA0834	cyclin-dependent kinase 14	protein-coding
16877	chr5	136591895	136592108	+	5.54	6.51	0.65	5.86	1.94e-11	1.34e-10	0	NA	Intergenic	Intergenic	-24511	NM_001291238	13047	Mm.320317	NM_009986	ENSMUSG00000029705	Cux1	CDP|Cutl1|Cux|Cux-1	cut-like homeobox 1	protein-coding
10290	chr16	24361753	24362018	+	6.05	7.02	1.23	5.8	5.16e-15	5.88e-14	0	NA	Intergenic	Intergenic	-31465	NM_178665	210126	Mm.209385	NM_178665	ENSMUSG00000033306	Lpp	9430020K16Rik|AA959454|AU024130|B130055L10Rik|C79715|D630048H16	LIM domain containing preferred translocation partner in lipoma	protein-coding
26086	chrX	12346928	12347305	+	5.11	6.08	0.28	5.8	1.05e-08	4.73e-08	0	NA	intron (NR_045321	intron 1 of 3)	intron (NR_045321	intron 1 of 3)	7880	NR_045321	100043946	Mm.211985	NR_045321	ENSMUSG00000087591	Gm14635	-	predicted gene 14635	ncRNA
37362	chr12	39726294	39726519	+	4.5	5.48	-0.32	5.8	1.23e-06	3.85e-06	0	NA	Intergenic	Intergenic	310970	NM_007487	11861	Mm.12723	NM_007487	ENSMUSG00000047446	Arl4a	AI467555|Arl4	ADP-ribosylation factor-like 4A	protein-coding
37785	chr17	70943846	70944160	+	4.5	5.48	-0.32	5.8	1.4e-06	4.35e-06	0	NA	Intergenic	PB1D10|SINE|Alu	46513	NM_023402	67938	Mm.261329	NM_023402	ENSMUSG00000034868	Myl12b	1500001M02Rik|C77744|Mylc2b|RLC-B	myosin	light chain 12B	regulatory	protein-coding
6645	chrX	162302708	162303169	+	6.46	7.43	1.66	5.77	1.52e-18	2.68e-17	0	NA	Intergenic	Intergenic	-143497	NM_001081052	195727	Mm.336313	NM_001081052	ENSMUSG00000059493	Nhs	Gm389|Gm48|Nhs1|Xcat	NHS actin remodeling regulator	protein-coding
24870	chr11	83580855	83581192	+	5.07	6.05	0.28	5.76	5.57e-09	2.62e-08	0	NA	Intergenic	Intergenic	-1038	NR_036452	100504464	Mm.341706	NR_036452	ENSMUSG00000051832	E230016K23Rik	-	RIKEN cDNA E230016K23 gene	ncRNA
38023	chrX	102121377	102121638	+	4.47	5.44	-0.32	5.76	1.53e-06	4.72e-06	0	NA	intron (NM_027181	intron 1 of 3)	intron (NM_027181	intron 1 of 3)	2042	NM_027181	69713	Mm.371635	NM_027181	ENSMUSG00000079480	Pin4	2410002I22Rik|EPVH|Par14	protein (peptidyl-prolyl cis/trans isomerase) NIMA-interacting	4 (parvulin)	protein-coding
42263	chr7	90113469	90113761	+	4.46	5.43	-0.32	5.75	5.44e-06	1.51e-05	0	NA	Intergenic	MTC|LTR|ERVL-MaLR	15859	NR_046006	78329	Mm.389940	NR_046006	ENSMUSG00000097162	2310010J17Rik	-	RIKEN cDNA 2310010J17 gene	ncRNA
18963	chr13	24096018	24096353	+	5.42	6.39	0.65	5.74	1.12e-10	6.94e-10	0	NA	intron (NM_026825	intron 21 of 37)	intron (NM_026825	intron 21 of 37)	-104971	NM_145399	214189	Mm.255667	NM_145399	ENSMUSG00000021337	Scgn	-	secretagogin	EF-hand calcium binding protein	protein-coding
3165	chr5	104380554	104380920	+	7.01	7.98	2.25	5.73	5.74e-25	2.12e-23	0	NA	Intergenic	Intergenic	-54374	NM_001204203	20750	Mm.288474	NM_009263	ENSMUSG00000029304	Spp1	2AR|Apl-1|BNSP|BSPI|Bsp|ETA-1|Eta|OP|Opn|Opnl|Ric|Spp-1	secreted phosphoprotein 1	protein-coding
38619	chrX	133602154	133602392	+	4.44	5.41	-0.32	5.73	1.85e-06	5.61e-06	0	NA	intron (NM_001105245	intron 5 of 5)	intron (NM_001105245	intron 5 of 5)	-85507	NR_153117	102632590	Mm.403836	NR_153117	ENSMUSG00000096978	Gm26851	-	predicted gene	26851	ncRNA
39113	chr9	56003211	56003456	+	4.42	5.4	-0.32	5.72	2.17e-06	6.51e-06	0	NA	Intergenic	Intergenic	-22401	NM_183111	75258	Mm.108821	NM_183111	ENSMUSG00000050702	4930563M21Rik	Rfpl3s	RIKEN cDNA 4930563M21 gene	protein-coding
238	chr6	125413159	125413819	+	8.27	9.24	3.53	5.71	5.33e-55	2.63e-52	0	NA	Intergenic	L1MB7|LINE|L1	-32985	NM_198604	213522	Mm.333396	NM_198604	ENSMUSG00000038167	Plekhg6	BC026778|Gm155	pleckstrin homology domain containing	family G (with RhoGef domain) member 6	protein-coding
27705	chr8	95064608	95064859	+	4.98	5.95	0.24	5.71	2.43e-08	1.03e-07	0	NA	intron (NM_001042715	intron 7 of 17)	B1_Mur4|SINE|Alu	9630	NM_001042715	330830	Mm.277112	NM_001042715	ENSMUSG00000031786	Drc7	Ccdc135|Gm770|SRG-L|SRG-S	dynein regulatory complex subunit 7	protein-coding
583	chr9	62624478	62625223	+	8.17	9.14	3.44	5.7	3.89e-43	7.81e-41	0	NA	Intergenic	Intergenic	-53005	NM_176922	319480	Mm.34883	NM_176922	ENSMUSG00000032243	Itga11	4732459H24Rik	integrin alpha 11	protein-coding
12227	chrX	95902700	95903061	+	5.9	6.87	1.23	5.65	1.02e-13	9.78e-13	0	NA	intron (NM_001034907	intron 5 of 8)	MTEb-int|LTR|ERVL-MaLR	54094	NM_152822	76130	Mm.274318	NM_152822	ENSMUSG00000057421	Las1l	1810030A06Rik|5830482G23Rik	LAS1-like (S. cerevisiae)	protein-coding
41530	chrX	8084850	8085103	+	4.34	5.31	-0.32	5.63	4.5e-06	1.27e-05	0	NA	intron (NM_009515	intron 11 of 11)	RMER15|LTR|ERVL	5515	NM_009515	22376	Mm.4735	NM_009515	ENSMUSG00000031165	Was	U42471|Wasp	Wiskott-Aldrich syndrome	protein-coding
19163	chr6	34836269	34836577	+	5.36	6.33	0.71	5.62	1.32e-10	8.09e-10	0	NA	intron (NM_178630	intron 15 of 18)	intron (NM_178630	intron 15 of 18)	-26723	NM_197986	68487	Mm.248440	NM_197986	ENSMUSG00000057137	Tmem140	1110007F12Rik	transmembrane protein 140	protein-coding
13179	chr1	163512787	163513208	+	5.86	6.84	1.23	5.61	3.58e-13	3.18e-12	0	NA	Intergenic	Intergenic	-109328	NM_178883	98376	Mm.32901	NM_178883	ENSMUSG00000040124	Gorab	NTKL-BP1|SCYL1-BP1|Scyl1bp1	golgin	RAB6-interacting	protein-coding
41315	chr14	57873682	57873897	+	4.32	5.29	-0.32	5.61	4.27e-06	1.21e-05	0	NA	intron (NM_029492	intron 3 of 12)	intron (NM_029492	intron 3 of 12)	16547	NM_001360098	75965	Mm.29044	NM_029492	ENSMUSG00000021969	Zdhhc20	4930542A17Rik|5033406L14Rik|AI448102|B230110O18Rik|HK11	zinc finger	DHHC domain containing 20	protein-coding
43262	chr2	79816152	79816372	+	4.32	5.29	-0.32	5.61	7.22e-06	1.96e-05	0	NA	non-coding (NR_110979	exon 5 of 5)	non-coding (NR_110979	exon 5 of 5)	92137	NM_001355144	18573	Mm.40678	NM_016744	ENSMUSG00000059173	Pde1a	AI987702|AW125737	phosphodiesterase 1A	calmodulin-dependent	protein-coding
41245	chr14	118823428	118823618	+	4.3	5.27	-0.32	5.59	4.18e-06	1.19e-05	0	NA	intron (NM_001160097	intron 1 of 3)	MTEa|LTR|ERVL-MaLR	-31427	NM_001160099	58187	Mm.390755	NM_021386	ENSMUSG00000022132	Cldn10	6720456I16Rik|Cldn10a|Cldn10b|D14Ertd728e	claudin 10	protein-coding
42091	chrX	114292138	114292379	+	4.3	5.27	-0.32	5.59	5.2e-06	1.45e-05	0	NA	Intergenic	ORR1D2|LTR|ERVL-MaLR	-182075	NM_001290477	237010	Mm.132583	NM_172781	ENSMUSG00000025597	Klhl4	B130014A11|C130018J01Rik	kelch-like 4	protein-coding
41639	chr14	31090037	31090220	+	4.28	5.25	-0.32	5.57	4.67e-06	1.31e-05	0	NA	intron (NM_001359857	intron 25 of 30)	intron (NM_001359857	intron 25 of 30)	38802	NM_001308464	66487	Mm.379116	NM_001308091	ENSMUSG00000058351	Smim4	2010107H07Rik|Gm41122	small integral membrane protein 4	protein-coding
36890	chr17	12094727	12095869	+	8.87	9.84	4.28	5.56	1.05e-06	3.34e-06	0	NA	Intergenic	Tigger15a|DNA|TcMar-Tigger	-23986	NM_026644	68262	Mm.258300	NM_026644	ENSMUSG00000023827	Agpat4	1500003P24Rik	1-acylglycerol-3-phosphate O-acyltransferase 4 (lysophosphatidic acid acyltransferase	delta)	protein-coding
42087	chr8	31237372	31237571	+	4.26	5.23	-0.32	5.55	5.19e-06	1.45e-05	0	NA	3' UTR (NM_001286424	exon 4 of 4)	3' UTR (NM_001286424	exon 4 of 4)	50140	NM_134161	171167	Mm.334477	NM_134161	ENSMUSG00000046152	Fut10	fuc-TX|fut10A	fucosyltransferase 10	protein-coding
42789	chr2	79398895	79399070	+	4.26	5.23	-0.32	5.55	6.31e-06	1.73e-05	0	NA	intron (NM_001048176	intron 1 of 12)	intron (NM_001048176	intron 1 of 12)	30006	NM_001048176	228094	Mm.440704	NM_001033295	ENSMUSG00000075256	Cerkl	Gm1958|Rp26	ceramide kinase-like	protein-coding
42305	chr9	58027883	58028100	+	4.25	5.22	-0.32	5.54	5.51e-06	1.53e-05	0	NA	TTS (NM_019779)	TTS (NM_019779)	-4283	NM_001243265	330951	Mm.406992	NM_001243265		Gm16130	E330033L03	predicted gene 16130	protein-coding
43736	chr1	159966396	159966579	+	4.25	5.22	-0.32	5.54	8.23e-06	2.21e-05	0	NA	Intergenic	Intergenic	-77893	NM_001162896	67647	Mm.171518	NM_001024470	ENSMUSG00000090394	4930523C07Rik	-	RIKEN cDNA 4930523C07 gene	protein-coding
1557	chr14	121239245	121239880	+	7.46	8.43	2.9	5.53	5.62e-32	4.23e-30	0	NA	intron (NM_134082	intron 10 of 26)	intron (NM_134082	intron 10 of 26)	-9144	NR_155502	320268	Mm.435974	NR_155502		B930095G15Rik	-	RIKEN cDNA B930095G15 gene	ncRNA
24248	chrX	166316712	166317116	+	5.21	6.18	0.65	5.53	3.9e-09	1.89e-08	0	NA	intron (NM_001177961	intron 1 of 6)	intron (NM_001177961	intron 1 of 6)	-27639	NM_001177957	14758	Mm.222320	NM_023122	ENSMUSG00000031342	Gpm6b	AI593561|Gpm6|M6B	glycoprotein m6b	protein-coding
371	chr2	173730155	173730997	+	8.13	9.1	3.58	5.52	1.67e-48	5.27e-46	0	NA	Intergenic	RMER5|LTR|ERV1	-6995	NM_019806	56491	Mm.260456	NM_019806	ENSMUSG00000054455	Vapb	AI225786|AI840687|AI848259|D2Abb2e|R75548|VAP33b|Vamp33b	vesicle-associated membrane protein	associated protein B and C	protein-coding
21541	chrX	69332262	69332821	+	5.25	6.22	0.71	5.52	7.26e-10	3.95e-09	0	NA	Intergenic	Intergenic	-27790	NM_008032	14266	Mm.466576	NM_008032	ENSMUSG00000031189	Aff2	FMR2P|Fmr2|Ox19|Oxh	AF4/FMR2 family	member 2	protein-coding
2762	chr9	99720026	99720710	+	7.02	7.99	2.48	5.51	2.82e-26	1.2e-24	0	NA	Intergenic	Intergenic	-3101	NM_001194923	56492	Mm.386784	NM_019815	ENSMUSG00000032473	Cldn18	-	claudin 18	protein-coding
42929	chr3	55145044	55145229	+	4.22	5.19	-0.32	5.51	6.54e-06	1.79e-05	0	NA	intron (NM_177203	intron 2 of 7)	intron (NM_177203	intron 2 of 7)	2895	NR_110780	320604	Mm.213909	NM_177203	ENSMUSG00000048655	Ccdc169	A730037C10Rik	coiled-coil domain containing 169	protein-coding
5331	chr2	52753560	52753956	+	6.53	7.5	2	5.5	2.73e-20	6.01e-19	0	NA	Intergenic	MurERV4_19-int|LTR|ERVK	-11609	NM_019667	56324	Mm.263639	NM_019667	ENSMUSG00000055371	Stam2	1200004O12Rik|5730456G07Rik|BB145015|Hbp	signal transducing adaptor molecule (SH3 domain and ITAM motif) 2	protein-coding
16706	chr18	52478534	52478800	+	5.5	6.47	0.97	5.5	1.65e-11	1.16e-10	0	NA	intron (NM_026040	intron 3 of 7)	intron (NM_026040	intron 3 of 7)	12974	NM_026040	67222	Mm.100617	NM_026040	ENSMUSG00000024528	Srfbp1	2810036K01Rik|p49/STRAP	serum response factor binding protein 1	protein-coding
29876	chr17	32738515	32738792	+	4.78	5.75	0.24	5.5	6.74e-08	2.65e-07	0	NA	Intergenic	URR1A|DNA|hAT-Charlie	48894	NM_001346705	208292	Mm.38813	NM_172458	ENSMUSG00000024298	Zfp871	4732483N19|9030612M13Rik|AI118577|AI265322|mKIAA3006	zinc finger protein 871	protein-coding
1551	chr13	95424665	95425240	+	7.49	8.46	2.97	5.48	5.28e-32	3.99e-30	0	NA	Intergenic	RMER5|LTR|ERV1	19879	NM_198408	12919	Mm.316614	NM_198408	ENSMUSG00000021680	Crhbp	CRH-BP	corticotropin releasing hormone binding protein	protein-coding
9248	chr16	26211462	26211854	+	6.16	7.13	1.65	5.48	7.78e-16	9.86e-15	0	NA	Intergenic	Lx8|LINE|L1	-105874	NM_173379	210530	Mm.326869	NM_173379	ENSMUSG00000038168	P3h2	4832416N06|AW553532|Leprel1|Mlat4	prolyl 3-hydroxylase 2	protein-coding
44278	chr6	124630856	124631087	+	4.19	5.16	-0.32	5.48	9.62e-06	2.55e-05	0	NA	intron (NM_173864	intron 5 of 10)	intron (NM_173864	intron 5 of 10)	5114	NM_173864	317677	Mm.483270	NM_173864	ENSMUSG00000079343	C1s2	C1sb|EG317677|Gm5077	complement component 1	s subcomponent 2	protein-coding
45332	chr3	101030714	101030898	+	4.18	5.14	-0.32	5.47	1.28e-05	3.3e-05	0	NA	Intergenic	Intergenic	-1311	NM_001167906	630146	Mm.190915	NM_001099332	ENSMUSG00000086564	Cd101	EWI-101|Gm1016|Gm734|Igsf2	CD101 antigen	protein-coding
43977	chr16	34610205	34610382	+	4.17	5.14	-0.32	5.46	8.82e-06	2.35e-05	0	NA	Intergenic	Intergenic	-40918	NM_030744	76378	Mm.23515	NM_030744	ENSMUSG00000022832	Ropn1	1700008N21Rik|ODF6|RHPNAP1|Rppn|ropporin	ropporin	rhophilin associated protein 1	protein-coding
16959	chr18	10290382	10290729	+	5.52	6.48	1.03	5.45	2.08e-11	1.44e-10	0	NA	Intergenic	Intergenic	-34624	NM_001083628	381157	Mm.261535	NM_001083628	ENSMUSG00000042942	Greb1l	mKIAA4095	growth regulation by estrogen in breast cancer-like	protein-coding
18533	chr9	23190975	23191347	+	5.45	6.42	0.97	5.45	8.05e-11	5.09e-10	0	NA	Intergenic	Intergenic	-31915	NM_028472	73230	Mm.335020	NM_028472	ENSMUSG00000031963	Bmper	3110056H04Rik|CV-2|Crim3|Cv2	BMP-binding endothelial regulator	protein-coding
21830	chr3	90575341	90575749	+	5.18	6.15	0.71	5.44	8.97e-10	4.82e-09	0	NA	Intergenic	Intergenic	-9114	NM_001355597	20197	Mm.440044	NM_011310	ENSMUSG00000001021	S100a3	S100E	S100 calcium binding protein A3	protein-coding
44408	chr1	88109092	88109277	+	4.15	5.11	-0.32	5.44	9.94e-06	2.63e-05	0	NA	intron (NM_201410	intron 2 of 5)	intron (NM_201410	intron 2 of 5)	5927	NM_201410	394435	Mm.300095	NM_201410	ENSMUSG00000090145	Ugt1a6b	A9'|Ugt1a9	UDP glucuronosyltransferase 1 family	polypeptide A6B	protein-coding
13647	chr19	18890112	18890791	+	8.11	9.08	3.65	5.43	6.4e-13	5.5e-12	0	NA	intron (NM_153417	intron 38 of 38)	intron (NM_153417	intron 38 of 38)	110666	NM_001289921	225998	Mm.234641	NM_146095	ENSMUSG00000036192	Rorb	Nr1f2|RZR-beta|RZRB|Rorbeta|hstp	RAR-related orphan receptor beta	protein-coding
13957	chr14	65451846	65452259	+	5.69	6.66	1.23	5.43	9.47e-13	7.95e-12	0	NA	Intergenic	RSINE1|SINE|B4	-26580	NM_001205075	18155	Mm.16347	NM_010932	ENSMUSG00000045731	Pnoc	N/OFQ|Npnc1|OFQ/N	prepronociceptin	protein-coding
249	chr11	52079937	52080568	+	8.29	9.25	3.83	5.42	4.51e-54	2.12e-51	0	NA	intron (NM_001166654	intron 13 of 13)	intron (NM_001166654	intron 13 of 13)	-18572	NM_019411	19052	Mm.260288	NM_019411	ENSMUSG00000020349	Ppp2ca	PP2A|R75353	protein phosphatase 2 (formerly 2A)	catalytic subunit	alpha isoform	protein-coding
44872	chr12	119215309	119215495	+	4.13	5.1	-0.32	5.42	1.13e-05	2.96e-05	0	NA	intron (NM_177290	intron 1 of 13)	intron (NM_177290	intron 1 of 13)	22874	NM_177290	320910	Mm.217000	NM_177290	ENSMUSG00000025321	Itgb8	4832412O06Rik	integrin beta 8	protein-coding
127	chr2	126302902	126303794	+	8.7	9.67	4.26	5.41	2.33e-63	2.15e-60	0	NA	Intergenic	Intergenic	151207	NM_001355583	69185	Mm.29019	NM_026981	ENSMUSG00000023330	Dtwd1	1810033A06Rik	DTW domain containing 1	protein-coding
1874	chrX	94169299	94170018	+	7.28	8.25	2.84	5.41	4.07e-30	2.54e-28	0	NA	Intergenic	PB1D9|SINE|Alu	42993	NM_012010	26905	Mm.218851	NM_012010	ENSMUSG00000035150	Eif2s3x	AA409828|AA547477|AI314668|Eif-2gx	eukaryotic translation initiation factor 2	subunit 3	structural gene X-linked	protein-coding
38212	chr14	46790753	46791277	+	6.99	7.95	2.54	5.41	1.64e-06	5.03e-06	0	NA	Intergenic	Intergenic	-2658	NM_001355011	12793	Mm.3261	NM_009919	ENSMUSG00000015759	Cnih1	0610007J15|CNIH-1|Cnih	cornichon family AMPA receptor auxiliary protein 1	protein-coding
45031	chr10	29450731	29450942	+	4.12	5.08	-0.32	5.41	1.18e-05	3.08e-05	0	NA	Intergenic	RMER15|LTR|ERVL	85031	NM_028351	72780	Mm.45191	NM_028351	ENSMUSG00000019880	Rspo3	2810459H04Rik|AW742308|Cristin1|Thsd2	R-spondin 3	protein-coding
39021	chr11	101002973	101003417	+	7.66	8.63	3.24	5.39	2.11e-06	6.34e-06	0	NA	Intergenic	Intergenic	-6257	NM_016920	11975	Mm.340818	NM_016920	ENSMUSG00000019302	Atp6v0a1	AA959968|ATP6a1|Atp6n1|Atp6n1a|Atpv0a1|Vpp-1|Vpp1	ATPase	H+ transporting	lysosomal V0 subunit A1	protein-coding
45262	chr2	49204184	49204391	+	4.11	5.07	-0.32	5.39	1.26e-05	3.26e-05	0	NA	intron (NM_029924	intron 6 of 16)	B1F|SINE|Alu	-41613	NM_001290656	109241	Mm.440436	NM_029924	ENSMUSG00000036792	Mbd5	9430004D19Rik|AA536666|AI426407|C030040A15Rik|Gm1630	methyl-CpG binding domain protein 5	protein-coding
46012	chr9	61661760	61661930	+	4.11	5.07	-0.32	5.39	1.51e-05	3.85e-05	0	NA	Intergenic	Intergenic	252665	NM_018853	56040	Mm.3158	NM_018853	ENSMUSG00000007892	Rplp1	2410042H16Rik|Arpp1|C430017H15Rik	ribosomal protein	large	P1	protein-coding
393	chr4	116672675	116673287	+	8.06	9.03	3.64	5.38	8.8e-48	2.62e-45	0	NA	Intergenic	Intergenic	-12618	NM_011034	18477	Mm.30929	NM_011034	ENSMUSG00000028691	Prdx1	MSP23|NkefA|OSF-3|OSF3|PAG|Paga|PrdxI|PrxI|TDX2|TPxA|Tdpx2|prx1	peroxiredoxin 1	protein-coding
3030	chr13	32884763	32885173	+	7.1	8.06	2.69	5.38	2.1e-25	8.12e-24	0	NA	intron (NM_173051	intron 4 of 6)	intron (NM_173051	intron 4 of 6)	13172	NM_173051	380839	Mm.250802	NM_173051	ENSMUSG00000079049	Serpinb1c	EIC|ovalbumin	serine (or cysteine) peptidase inhibitor	clade B	member 1c	protein-coding
5625	chr8	34523786	34524263	+	6.57	7.54	2.16	5.38	6.89e-20	1.44e-18	0	NA	Intergenic	Intergenic	116292	NR_040706	330734	Mm.149998	NR_040706	ENSMUSG00000109819	B930018H19Rik	B930018H19	RIKEN cDNA B930018H19 gene	ncRNA
45526	chr14	72784364	72784556	+	4.09	5.06	-0.32	5.38	1.34e-05	3.45e-05	0	NA	Intergenic	Intergenic	-74457	NM_207636	319448	Mm.205421	NM_207636	ENSMUSG00000033487	Fndc3a	1700094E19Rik|D14Ertd453e|F730017H24Rik|Fndc3|sys	fibronectin type III domain containing 3A	protein-coding
46831	chr1	64993290	64993504	+	4.07	5.04	-0.32	5.36	1.84e-05	4.61e-05	0	NA	Intergenic	Intergenic	-36573	NM_001039493	241075	Mm.239534	NM_175509	ENSMUSG00000051344	Plekhm3	9430067K14Rik|A230102O09Rik|AI449570|DAPR|Plekhm1l	pleckstrin homology domain containing	family M	member 3	protein-coding
9647	chrX	152764054	152764592	+	6.11	7.07	1.72	5.35	1.69e-15	2.06e-14	0	NA	intron (NM_172441	intron 1 of 9)	intron (NM_172441	intron 1 of 9)	5163	NM_172441	110380	Mm.40796	NM_172441	ENSMUSG00000045180	Shroom2	4832440C16|Apxl|C630003H05Rik|Shrm2	shroom family member 2	protein-coding
309	chr7	43787967	43788620	+	8.19	9.15	3.81	5.34	5.5e-51	2.09e-48	0	NA	Intergenic	Intergenic	-3598	NM_028660	101533	Mm.19942	NM_028660	ENSMUSG00000047884	Klk9	1200016C12Rik|AI324041	kallikrein related-peptidase 9	protein-coding
19857	chr7	43399527	43399855	+	5.34	6.31	0.97	5.34	2.29e-10	1.35e-09	0	NA	Intergenic	Intergenic	-8589	NM_172900	243958	Mm.24444	NM_172900	ENSMUSG00000030468	Siglecg	9830164H23|A630096C01Rik|Siglec-G|Siglec10|mSiglec-G	sialic acid binding Ig-like lectin G	protein-coding
25693	chr3	122693085	122693419	+	5.05	6.02	0.68	5.34	8.67e-09	3.96e-08	0	NA	Intergenic	L2|LINE|L2	-35906	NM_153422	242202	Mm.134911	NM_153422	ENSMUSG00000053965	Pde5a	Cgbpde|Cn5n|PDE5a2|Pde5|Pde5a1	phosphodiesterase 5A	cGMP-specific	protein-coding
29087	chr2	112443424	112443889	+	7.41	8.37	3.03	5.34	4.75e-08	1.92e-07	0	NA	Intergenic	Intergenic	-11369	NM_133749	73024	Mm.268027	NM_133749	ENSMUSG00000055943	Emc7	2900064A13Rik|AI451465|ORF3|c11orf3	ER membrane protein complex subunit 7	protein-coding
5894	chr7	47108830	47109286	+	6.49	7.46	2.12	5.33	1.69e-19	3.37e-18	0	NA	intron (NM_001163565	intron 2 of 13)	intron (NM_001163565	intron 2 of 13)	23540	NM_001163565	19259	Mm.4654	NM_013643	ENSMUSG00000030854	Ptpn5	Step	protein tyrosine phosphatase	non-receptor type 5	protein-coding
10082	chr13	38786165	38786545	+	6.09	7.05	1.72	5.33	3.67e-15	4.27e-14	0	NA	Intergenic	B4A|SINE|B4	-127327	NM_025380	66143	Mm.490319	NM_025380	ENSMUSG00000001707	Eef1e1	1110003A02Rik	eukaryotic translation elongation factor 1 epsilon 1	protein-coding
1857	chr14	122716032	122716703	+	7.37	8.34	3.02	5.32	3.28e-30	2.07e-28	0	NA	intron (NM_144844	intron 18 of 23)	intron (NM_144844	intron 18 of 23)	182039	NM_144844	110821	Mm.23876	NM_144844	ENSMUSG00000041650	Pcca	C79630	propionyl-Coenzyme A carboxylase	alpha polypeptide	protein-coding
15652	chrX	96077781	96078071	+	5.59	6.55	1.23	5.32	5.85e-12	4.39e-11	0	NA	Intergenic	Intergenic	-18119	NM_010833	17698	Mm.138876	NM_010833	ENSMUSG00000031207	Msn	C78546	moesin	protein-coding
391	chr6	136965797	136966457	+	8.25	9.22	3.9	5.31	8.06e-48	2.42e-45	0	NA	Intergenic	Intergenic	11604	NM_023898	78600	Mm.290622	NM_023898	ENSMUSG00000064330	Pde6h	A930033D18Rik|PDEgamma	phosphodiesterase 6H	cGMP-specific	cone	gamma	protein-coding
32927	chrX	9480344	9480637	+	4.62	5.58	0.28	5.3	2.46e-07	8.76e-07	0	NA	Intergenic	RLTR1C|LTR|ERV1	-11166	NM_007807	13058	Mm.200362	NM_007807	ENSMUSG00000015340	Cybb	C88302|CGD91-phox|Cgd|Cyd|Nox2|gp91-1|gp91phox	cytochrome b-245	beta polypeptide	protein-coding
16276	chr18	52497251	52497597	+	5.59	6.55	1.26	5.29	1.11e-11	7.99e-11	0	NA	Intergenic	LTR40b|LTR|ERVL	31731	NM_026040	67222	Mm.100617	NM_026040	ENSMUSG00000024528	Srfbp1	2810036K01Rik|p49/STRAP	serum response factor binding protein 1	protein-coding
24324	chr17	62510279	62510492	+	5.04	6	0.71	5.29	4.09e-09	1.97e-08	0	NA	Intergenic	Intergenic	370932	NM_010109	13640	Mm.7978	NM_010109	ENSMUSG00000048915	Efna5	AL-1|AV158822|EFL-5|Ephrin-A5|Epl7|LERK-7|RAGS	ephrin A5	protein-coding
459	chr16	52000082	52000745	+	8.12	9.08	3.8	5.28	5.07e-46	1.3e-43	0	NA	Intergenic	Intergenic	-13126	NR_153657	629091	Mm.364775	NR_153657		Gm29686	-	predicted gene	29686	ncRNA
1266	chr17	24034874	24035499	+	7.59	8.55	3.28	5.27	2.62e-34	2.42e-32	0	NA	Intergenic	RLTR30D2_MM|LTR|ERV1	-3057	NM_175440	213171	Mm.133083	NM_175440	ENSMUSG00000050762	Prss27	CAPH2|Mpn|marapsin	protease	serine 27	protein-coding
12564	chr15	65698661	65699019	+	5.8	6.76	1.49	5.27	1.61e-13	1.51e-12	0	NA	Intergenic	MLT1G3|LTR|ERVL-MaLR	-88180	NM_133766	76740	Mm.260647	NM_133766	ENSMUSG00000015002	Efr3a	A130089M23Rik|BB071175|C76891|C920006C10Rik|D030063F01Rik|mKIAA0143	EFR3 homolog A	protein-coding
25821	chr13	73706043	73706332	+	4.96	5.92	0.65	5.27	9.22e-09	4.19e-08	0	NA	intron (NM_027780	intron 1 of 1)	intron (NM_027780	intron 1 of 1)	-5407	NM_028878	74338	Mm.271635	NM_028878	ENSMUSG00000021565	Slc6a19	4632401C08Rik|B<0>AT1	solute carrier family 6 (neurotransmitter transporter)	member 19	protein-coding
36391	chr11	87181462	87181659	+	4.56	5.52	0.24	5.27	8.9e-07	2.87e-06	0	NA	intron (NM_197987	intron 13 of 23)	intron (NM_197987	intron 13 of 23)	54485	NM_197987	68729	Mm.17436	NM_197987	ENSMUSG00000018548	Trim37	1110032A10Rik|2810004E07Rik|AI848587|AU043018|MUL|TEF3|mKIAA0898	tripartite motif-containing 37	protein-coding
6	chr3	31022508	31024001	+	9.65	10.61	5.35	5.26	3.44e-107	6.73e-103	0	NA	intron (NM_008857	intron 2 of 17)	Lx8|LINE|L1	-15712	NR_105975	102465610		NR_105975	ENSMUSG00000098890	Mir7008	Gm27752|mmu-mir-7008	microRNA 7008	ncRNA
1738	chr8	110815310	110815768	+	7.43	8.4	3.14	5.26	6.85e-31	4.62e-29	0	NA	intron (NM_133953	intron 20 of 25)	intron (NM_133953	intron 20 of 25)	-9615	NM_029646	76527	Mm.77697	NM_029646	ENSMUSG00000031750	Il34	2010004A03Rik|AI593503	interleukin 34	protein-coding
10148	chrX	152813445	152813870	+	5.99	6.95	1.69	5.26	4.09e-15	4.72e-14	0	NA	Intergenic	Intergenic	31736	NM_010951	18241	Mm.5157	NM_010951	ENSMUSG00000025333	Gpr143	Oa1	G protein-coupled receptor 143	protein-coding
15176	chr13	113484005	113484459	+	5.56	6.52	1.26	5.26	3.63e-12	2.8e-11	0	NA	intron (NR_045501	intron 3 of 6)	intron (NR_045501	intron 3 of 6)	18612	NR_045501	70917	Mm.491036	NR_045501	ENSMUSG00000114790	4921509O07Rik	-	RIKEN cDNA 4921509O07 gene	ncRNA
132	chr6	146527170	146528130	+	8.59	9.55	4.3	5.25	1.06e-62	9.46e-60	0	NA	Intergenic	Intergenic	-25427	NM_019923	16439	Mm.7800	NM_010586	ENSMUSG00000030287	Itpr2	AI649341|InsP3R-2|InsP3R-5|Ip3r2|Itpr5|insP3R2	inositol 1	4	5-triphosphate receptor 2	protein-coding
9126	chr3	136166634	136167144	+	6.25	7.21	1.95	5.25	6.03e-16	7.74e-15	0	NA	intron (NM_001033350	intron 7 of 16)	intron (NM_001033350	intron 7 of 16)	159177	NM_001033350	242248	Mm.30832	NM_001033350	ENSMUSG00000037922	Bank1	A530094C12Rik|AI451642|AVIEF|BANK	B cell scaffold protein with ankyrin repeats 1	protein-coding
37192	chr7	139715832	139716021	+	4.53	5.49	0.24	5.25	1.16e-06	3.65e-06	0	NA	Intergenic	L1MEc|LINE|L1	-32111	NM_001302546	212124	Mm.425507	NM_177212	ENSMUSG00000049571	Cfap46	9330101J02Rik|E030019B06Rik|Gm170|Ttc40	cilia and flagella associated protein 46	protein-coding
12578	chr3	60398873	60399156	+	5.76	6.72	1.48	5.24	1.65e-13	1.53e-12	0	NA	Intergenic	B2_Mm2|SINE|B2	-73816	NM_001253713	56758	Mm.255723	NM_020007	ENSMUSG00000027763	Mbnl1	Mbnl|mKIAA0428	muscleblind like splicing factor 1	protein-coding
1014	chr18	32444617	32445512	+	7.76	8.72	3.49	5.23	7.9e-37	9.14e-35	0	NA	Intergenic	Intergenic	-66780	NR_045403	402767	Mm.385109	NR_045403	ENSMUSG00000097413	A830052D11Rik	-	RIKEN cDNA A830052D11 gene	ncRNA
4640	chr9	61664026	61664500	+	6.66	7.62	2.39	5.23	1.68e-21	4.23e-20	0	NA	Intergenic	Intergenic	250247	NM_018853	56040	Mm.3158	NM_018853	ENSMUSG00000007892	Rplp1	2410042H16Rik|Arpp1|C430017H15Rik	ribosomal protein	large	P1	protein-coding
35311	chr10	122953649	122953917	+	4.51	5.47	0.24	5.23	6.09e-07	2.02e-06	0	NA	Intergenic	L1M4|LINE|L1	31941	NR_029527	387251		NR_029527	ENSMUSG00000065406	Mirlet7i	Mirnlet7i|let-7i|mmu-let-7i	microRNA let7i	ncRNA
5723	chr16	37603333	37603814	+	6.5	7.46	2.24	5.22	9.54e-20	1.96e-18	0	NA	intron (NR_027778	intron 3 of 12)	URR1B|DNA|hAT-Charlie	23420	NM_013547	15233	Mm.157442	NM_013547	ENSMUSG00000022821	Hgd	Hgo|aku	homogentisate 1	2-dioxygenase	protein-coding
5922	chr5	137015803	137016354	+	6.5	7.47	2.24	5.22	1.84e-19	3.64e-18	0	NA	Intergenic	MTEb|LTR|ERVL-MaLR	-14217	NM_001039385	381677	Mm.389697	NM_001039385	ENSMUSG00000037428	Vgf	Gm1052	VGF nerve growth factor inducible	protein-coding
14178	chr18	63407046	63407325	+	5.7	6.66	1.45	5.22	1.23e-12	1.02e-11	0	NA	Intergenic	Intergenic	-20002	NM_001039485	667742	Mm.158720	NM_172629	ENSMUSG00000041482	Piezo2	5930434P17|9030411M15Rik|9430028L06Rik|Fam38b|Fam38b2	piezo-type mechanosensitive ion channel component 2	protein-coding
35936	chr13	32556476	32556710	+	4.5	5.46	0.24	5.22	7.61e-07	2.48e-06	0	NA	Intergenic	Intergenic	-218049	NM_146041	218138	Mm.247143	NM_146041	ENSMUSG00000038372	Gmds	BC031788|C87208	GDP-mannose 4	6-dehydratase	protein-coding
271	chr1	151906736	151907732	+	8.22	9.18	3.97	5.21	3.44e-53	1.49e-50	0	NA	intron (NM_197990	intron 5 of 5)	intron (NM_197990	intron 5 of 5)	151860	NM_001311165	66967	Mm.337691	NM_001039644	ENSMUSG00000043019	Edem3	2310050N11Rik	ER degradation enhancer	mannosidase alpha-like 3	protein-coding
1175	chr3	144971563	144972190	+	7.71	8.67	3.46	5.21	4.66e-35	4.65e-33	0	NA	intron (NM_207208	intron 1 of 13)	intron (NM_207208	intron 1 of 13)	3169	NM_207208	99663	Mm.442050	NM_207208	ENSMUSG00000068547	Clca4a	9130020L07Rik|AI504701|Clca4|Clca6	chloride channel accessory 4A	protein-coding
1787	chr10	43634293	43635198	+	7.77	8.73	3.52	5.21	1.4e-30	9.17e-29	0	NA	Intergenic	Intergenic	41318	NR_033558	414125	Mm.244305	NR_033558	ENSMUSG00000075184	F830002L21Rik	F930017D23Rik	RIKEN cDNA F830002L21 gene	ncRNA
6479	chr8	127638945	127639439	+	6.7	7.67	2.45	5.21	9.42e-19	1.71e-17	0	NA	Intergenic	Intergenic	339540	NM_001013580	93742	Mm.299254	NM_033620	ENSMUSG00000025812	Pard3	AA960621|AI256638|Asip|D8Ertd580e|Par-3|Par3|Pard-3|Pard3a|Phip	par-3 family cell polarity regulator	protein-coding
10604	chrX	103298982	103299349	+	6.06	7.02	1.8	5.21	8.6e-15	9.5e-14	0	NA	Intergenic	Intergenic	-22233	NM_007674	12592	Mm.4353	NM_007674	ENSMUSG00000031326	Cdx4	Cdx-3|Cdx-4|Cdx3	caudal type homeobox 4	protein-coding
34892	chr14	118098372	118098567	+	4.53	5.49	0.28	5.21	5.19e-07	1.74e-06	0	NA	Intergenic	ORR1F|LTR|ERVL-MaLR	34296	NM_029578	76355	Mm.251537	NM_029578	ENSMUSG00000022130	Tgds	2610017J16Rik|2610025M23Rik|AI648925	TDP-glucose 4	6-dehydratase	protein-coding
1528	chr10	27863343	27864031	+	7.44	8.4	3.19	5.2	3.2e-32	2.46e-30	0	NA	Intergenic	Intergenic	-211133	NM_001359355	19272	Mm.332303	NM_008983	ENSMUSG00000019889	Ptprk	AI853699|PTPk|RPTPkappa	protein tyrosine phosphatase	receptor type	K	protein-coding
28185	chr10	13751210	13751458	+	4.92	5.88	0.68	5.2	3.09e-08	1.28e-07	0	NA	intron (NM_025446	intron 3 of 5)	intron (NM_025446	intron 3 of 5)	117623	NM_025446	66253	Mm.45755	NM_025446	ENSMUSG00000019806	Aig1	1500031O19Rik|AV064870|AW413422|CGI-103	androgen-induced 1	protein-coding
112	chr17	3349815	3350726	+	8.77	9.73	4.54	5.19	1.79e-65	1.87e-62	0	NA	intron (NM_001122998	intron 1 of 26)	intron (NM_001122998	intron 1 of 26)	23697	NM_001122998	24001	Mm.137134	NM_011878	ENSMUSG00000023800	Tiam2	3000002F19Rik|STEF|mKIAA2016	T cell lymphoma invasion and metastasis 2	protein-coding
639	chr10	44078770	44079711	+	7.89	8.86	3.66	5.19	3.19e-42	5.85e-40	0	NA	Intergenic	Intergenic	-74394	NM_172393	11630	Mm.292082	NM_172393	ENSMUSG00000019866	Crybg1	AI462491|AI463325|Aim1	crystallin beta-gamma domain containing 1	protein-coding
2649	chr2	120452492	120453058	+	7.18	8.14	2.95	5.19	1.3e-26	5.77e-25	0	NA	intron (NM_172672	intron 20 of 23)	intron (NM_172672	intron 20 of 23)	-10818	NM_007601	12335	Mm.458021	NM_007601	ENSMUSG00000079110	Capn3	AI323605|Capa-3|Capa3|Lp82|p94	calpain 3	protein-coding
4537	chr19	16558388	16558994	+	6.72	7.68	2.49	5.19	1.05e-21	2.72e-20	0	NA	intron (NM_008137	intron 2 of 6)	intron (NM_008137	intron 2 of 6)	123024	NM_008137	14675	Mm.313181	NM_008137	ENSMUSG00000024697	Gna14	AU023208	guanine nucleotide binding protein	alpha 14	protein-coding
11119	chrX	141439431	141439910	+	5.92	6.88	1.69	5.19	1.95e-14	2.06e-13	0	NA	intron (NM_053185	intron 2 of 44)	intron (NM_053185	intron 2 of 44)	34406	NM_053185	94216	Mm.155586	NM_053185	ENSMUSG00000031273	Col4a6	BB116301	collagen	type IV	alpha 6	protein-coding
26223	chrX	74213766	74214268	+	4.94	5.9	0.71	5.19	1.13e-08	5.04e-08	0	NA	Intergenic	Intergenic	32517	NM_010227	192176	Mm.295533	NM_010227	ENSMUSG00000031328	Flna	ABP-280|Dilp2|F730004A14Rik|Fln1|GENA 379|filamin-1	filamin	alpha	protein-coding
36184	chr11	63147303	63147511	+	4.47	5.43	0.24	5.19	8.31e-07	2.69e-06	0	NA	intron (NM_001302255	intron 3 of 4)	ID_B1|SINE|B4	14604	NM_001302260	18858	Mm.1237	NM_008885	ENSMUSG00000018217	Pmp22	22kDa|Gas-3|HNPP|TRE002|Tr|trembler	peripheral myelin protein 22	protein-coding
3934	chr1	10592532	10592979	+	6.81	7.78	2.6	5.18	5.83e-23	1.74e-21	0	NA	intron (NM_177834	intron 2 of 10)	MER68|LTR|ERVL	127190	NM_001289497	329093	Mm.336423	NM_177834	ENSMUSG00000042501	Cpa6	9030616D13Rik	carboxypeptidase A6	protein-coding
660	chr10	99236938	99237779	+	8.13	9.09	3.92	5.17	8.44e-42	1.5e-39	0	NA	Intergenic	Intergenic	-25873	NM_026268	67603	Mm.1791	NM_026268	ENSMUSG00000019960	Dusp6	1300019I03Rik|MKP-3|MKP3|PYST1	dual specificity phosphatase 6	protein-coding
22198	chrX	74274769	74275256	+	5.25	6.21	1.03	5.17	1.12e-09	5.92e-09	0	NA	promoter-TSS (NR_106059)	promoter-TSS (NR_106059)	-907	NR_106059	102466804		NR_106059	ENSMUSG00000099226	Mir7091	Gm27381|mmu-mir-7091	microRNA 7091	ncRNA
3950	chr4	115035104	115035396	+	6.77	7.73	2.57	5.16	6.3e-23	1.87e-21	0	NA	intron (NM_001304555	intron 14 of 16)	intron (NM_001304555	intron 14 of 16)	-21176	NM_011527	21349	Mm.239869	NM_011527	ENSMUSG00000028717	Tal1	Hpt|SCL/tal-1|Scl|bHLHa17|tal-1	T cell acute lymphocytic leukemia 1	protein-coding
4779	chr13	96533710	96534121	+	6.86	7.82	2.66	5.16	2.95e-21	7.24e-20	0	NA	intron (NM_012048	intron 1 of 14)	intron (NM_012048	intron 1 of 14)	8664	NM_012048	27015	Mm.89926	NM_012048	ENSMUSG00000021668	Polk	DINP|Dinb1	polymerase (DNA directed)	kappa	protein-coding
36750	chrX	8026909	8027192	+	4.45	5.41	0.24	5.16	1e-06	3.2e-06	0	NA	Intergenic	PB1|SINE|Alu	-8558	NM_027227	69824	Mm.279756	NM_027227	ENSMUSG00000031163	Glod5	2010001H14Rik|AV061890	glyoxalase domain containing 5	protein-coding
18542	chr3	69200302	69200671	+	5.42	6.38	1.23	5.15	8.13e-11	5.14e-10	0	NA	Intergenic	Intergenic	-21933	NM_027843	71619	Mm.98122	NM_027843	ENSMUSG00000098207	Arl14	9130014L17Rik|Arf7	ADP-ribosylation factor-like 14	protein-coding
540	chr9	69465940	69466705	+	7.99	8.95	3.82	5.14	3.85e-44	8.35e-42	0	NA	intron (NM_007585	intron 2 of 12)	ID_B1|SINE|B4	9378	NR_037296	100526560		NR_037296	ENSMUSG00000093042	Mir3109	mir-3109|mmu-mir-3109	microRNA 3109	ncRNA
23545	chrX	162018827	162019299	+	5.17	6.13	0.99	5.14	2.59e-09	1.29e-08	0	NA	intron (NM_001290526	intron 1 of 8)	intron (NM_001290526	intron 1 of 8)	140378	NM_001290526	195727	Mm.336313	NM_001081052	ENSMUSG00000059493	Nhs	Gm389|Gm48|Nhs1|Xcat	NHS actin remodeling regulator	protein-coding
338	chr5	136632211	136632913	+	8.23	9.19	4.05	5.13	6.33e-50	2.2e-47	0	NA	Intergenic	Intergenic	-60584	NM_021611	59310	Mm.5178	NM_021611	ENSMUSG00000005474	Myl10	1700027I08Rik|Mylc2pl|PLRLC	myosin	light chain 10	regulatory	protein-coding
854	chr8	23516070	23517011	+	8.14	9.1	3.97	5.13	5.86e-39	8.05e-37	0	NA	Intergenic	MLT2B2|LTR|ERVL	105038	NM_013834	20377	Mm.281691	NM_013834	ENSMUSG00000031548	Sfrp1	2210415K03Rik|AW011917|AW107218|AW742929|sFRP-1	secreted frizzled-related protein 1	protein-coding
2145	chr11	86650577	86651222	+	7.62	8.58	3.45	5.13	1.01e-28	5.5e-27	0	NA	intron (NM_001356531	intron 5 of 11)	intron (NM_001356531	intron 5 of 11)	20376	NM_001356531	75909	Mm.390398	NM_029478	ENSMUSG00000018171	Vmp1	3110098I04Rik|4930579A11Rik|AI787464|Tango5|Tmem49|mir-21a|ni-2	vacuole membrane protein 1	protein-coding
3551	chr17	61837375	61838014	+	7.04	8	2.86	5.13	6.35e-24	2.09e-22	0	NA	Intergenic	Intergenic	1043623	NM_010109	13640	Mm.7978	NM_010109	ENSMUSG00000048915	Efna5	AL-1|AV158822|EFL-5|Ephrin-A5|Epl7|LERK-7|RAGS	ephrin A5	protein-coding
4708	chrX	99335237	99336082	+	6.9	7.86	2.73	5.13	2.3e-21	5.72e-20	0	NA	Intergenic	URR1A|DNA|hAT-Charlie	108138	NR_033544	100038584	Mm.368385	NR_033544	ENSMUSG00000073051	Gm14812	-	predicted gene 14812	ncRNA
11869	chr14	31768475	31768869	+	5.88	6.84	1.71	5.13	5.86e-14	5.78e-13	0	NA	intron (NM_001024604	intron 2 of 27)	intron (NM_001024604	intron 2 of 27)	61743	NM_001024604	105522	Mm.37660	NM_001024604	ENSMUSG00000014496	Ankrd28	AI465466|AI604979|E430019N21Rik|mKIAA0379	ankyrin repeat domain 28	protein-coding
29573	chr8	86350199	86350439	+	4.87	5.83	0.71	5.13	5.83e-08	2.31e-07	0	NA	Intergenic	Intergenic	216271	NM_172912	244562	Mm.67485	NM_172912	ENSMUSG00000036872	Abcc12	4930467B22Rik|MRP9	ATP-binding cassette	sub-family C (CFTR/MRP)	member 12	protein-coding
4761	chr5	30901926	30902343	+	6.78	7.74	2.62	5.12	2.71e-21	6.68e-20	0	NA	intron (NM_001048192	intron 12 of 16)	B2_Mm2|SINE|B2	5654	NM_001134692	67695	Mm.21450	NM_024460	ENSMUSG00000038803	Ost4	2310016E02Rik	oligosaccharyltransferase complex subunit 4 (non-catalytic)	protein-coding
5566	chr9	110790434	110791021	+	6.61	7.57	2.45	5.12	5.75e-20	1.21e-18	0	NA	Intergenic	L1MB8|LINE|L1	-7458	NM_153099	235628	Mm.292285	NM_153099	ENSMUSG00000044664	Prss42	Tessp2	protease	serine 42	protein-coding
9749	chr5	58190567	58191030	+	6.02	6.98	1.85	5.12	2.09e-15	2.51e-14	0	NA	Intergenic	Intergenic	262200	NR_046190	78163	Mm.243828	NR_046190	ENSMUSG00000105234	4930459L07Rik	-	RIKEN cDNA 4930459L07 gene	ncRNA
28618	chr12	69999904	70000159	+	4.86	5.82	0.71	5.12	3.8e-08	1.56e-07	0	NA	Intergenic	MLT1D|LTR|ERVL-MaLR	-13029	NM_022028	64010	Mm.390480	NM_022028	ENSMUSG00000021067	Sav1	1700040G09Rik|Salv|Sav|WW45|Wwp3|Wwp4	salvador family WW domain containing 1	protein-coding
8532	chr1	65245709	65246169	+	6.16	7.11	2	5.11	1.85e-16	2.54e-15	0	NA	intron (NM_001310624	intron 19 of 41)	intron (NM_001310624	intron 19 of 41)	59254	NM_001310624	18711	Mm.38370	NM_011086	ENSMUSG00000025949	Pikfyve	5230400C17Rik|Pip5k|Pip5k3|Pipk5k3|PipkIII|p235	phosphoinositide kinase	FYVE type zinc finger containing	protein-coding
27929	chr2	10301396	10301711	+	4.83	5.79	0.68	5.11	2.71e-08	1.14e-07	0	NA	Intergenic	Intergenic	-68898	NM_001198808	353282	Mm.329991	NM_177386	ENSMUSG00000061186	Sfmbt2	D2Wsu23e|D330030P06Rik	Scm-like with four mbt domains 2	protein-coding
2401	chr8	86772700	86773490	+	7.34	8.3	3.2	5.1	1.4e-27	6.85e-26	0	NA	Intergenic	L1MB8|LINE|L1	-27089	NM_009172	20437	Mm.324553	NM_009172	ENSMUSG00000036840	Siah1a	AA982064|AI853500|Sinh1a	siah E3 ubiquitin protein ligase 1A	protein-coding
10725	chrX	139212853	139213263	+	6.1	7.06	1.95	5.1	1.02e-14	1.12e-13	0	NA	intron (NM_001164630	intron 3 of 6)	intron (NM_001164630	intron 3 of 6)	3014	NM_001164630	245631	Mm.131001	NM_175541	ENSMUSG00000042515	Mum1l1	9430086K21Rik	melanoma associated antigen (mutated) 1-like 1	protein-coding
12559	chrX	105393424	105393996	+	5.8	6.76	1.66	5.1	1.6e-13	1.49e-12	0	NA	Intergenic	Intergenic	-1956	NR_015552	100043213	Mm.388967	NR_015552	ENSMUSG00000087620	5330434G04Rik	-	RIKEN cDNA 5330434G04 gene	ncRNA
16014	chr6	17978367	17978733	+	5.79	6.75	1.65	5.1	8.41e-12	6.16e-11	0	NA	Intergenic	L2a|LINE|L2	51895	NM_023653	22413	Mm.33653	NM_023653	ENSMUSG00000010797	Wnt2	2610510E18Rik|Int1l1|Irp|Mirp|Wnt-2|Wnt2a	wingless-type MMTV integration site family	member 2	protein-coding
4224	chr6	17554748	17555165	+	6.71	7.67	2.58	5.09	2.7e-22	7.5e-21	0	NA	intron (NM_008591	intron 16 of 21)	intron (NM_008591	intron 16 of 21)	-82054	NM_007604	12343	Mm.392504	NM_007604	ENSMUSG00000015733	Capza2	1110053K06Rik|AW208808|Cappa2	capping protein (actin filament) muscle Z-line	alpha 2	protein-coding
38316	chr7	49870414	49870627	+	4.42	5.38	0.28	5.09	1.69e-06	5.17e-06	0	NA	Intergenic	Intergenic	-39779	NM_001146013	104245	Mm.207053	NM_148931	ENSMUSG00000039728	Slc6a5	Glyt2|prestin	solute carrier family 6 (neurotransmitter transporter	glycine)	member 5	protein-coding
23199	chr9	42871437	42872352	+	8.47	9.43	4.34	5.08	2.09e-09	1.06e-08	0	NA	intron (NM_175481	intron 1 of 20)	intron (NM_175481	intron 1 of 20)	72477	NM_175481	110637	Mm.370291	NM_175481	ENSMUSG00000032017	Grik4	6330551K01Rik|GluK4|GluRgamma1|KA-1|KA1	glutamate receptor	ionotropic	kainate 4	protein-coding
14582	chrX	73441501	73441789	+	5.75	6.71	1.64	5.07	1.88e-12	1.51e-11	0	NA	intron (NM_028633	intron 9 of 9)	Lx8|LINE|L1	-6302	NM_011907	24102	Mm.23312	NM_011907	ENSMUSG00000031372	Trex2	-	three prime repair exonuclease 2	protein-coding
15047	chr8	10906286	10906744	+	5.58	6.54	1.46	5.07	3.12e-12	2.43e-11	0	NA	Intergenic	Intergenic	6593	NR_102285	71624	Mm.139075	NR_102285	ENSMUSG00000109089	4833411C07Rik	-	RIKEN cDNA 4833411C07 gene	ncRNA
39686	chrX	10560110	10560339	+	4.4	5.35	0.28	5.07	2.59e-06	7.64e-06	0	NA	intron (NM_019634	intron 1 of 7)	B1F1|SINE|Alu	75108	NM_019634	21912	Mm.18590	NM_019634	ENSMUSG00000058254	Tspan7	1200014P11Rik|A15|AI323365|Cd231|Mxs1|PE31|R74651|TALLA|Tm4sf2	tetraspanin 7	protein-coding
11035	chrX	141292671	141293074	+	6.1	7.06	2	5.06	1.72e-14	1.82e-13	0	NA	intron (NM_053185	intron 3 of 44)	intron (NM_053185	intron 3 of 44)	181204	NM_053185	94216	Mm.155586	NM_053185	ENSMUSG00000031273	Col4a6	BB116301	collagen	type IV	alpha 6	protein-coding
12951	chr3	54431667	54431987	+	5.81	6.77	1.71	5.06	2.75e-13	2.49e-12	0	NA	Intergenic	Intergenic	70720	NM_001198766	50706	Mm.236067	NM_015784	ENSMUSG00000027750	Postn	A630052E07Rik|AI747096|OSF-2|Osf2|PLF|PN	periostin	osteoblast specific factor	protein-coding
4166	chr15	11095624	11096026	+	6.76	7.72	2.67	5.05	2.08e-22	5.86e-21	0	NA	intron (NM_175501	intron 2 of 23)	intron (NM_175501	intron 2 of 23)	31052	NM_175501	239337	Mm.224825	NM_175501	ENSMUSG00000047497	Adamts12	ADAMTS-12|AI605170	a disintegrin-like and metallopeptidase (reprolysin type) with thrombospondin type 1 motif	12	protein-coding
4205	chr11	53245517	53246025	+	6.79	7.74	2.69	5.05	2.52e-22	7.03e-21	0	NA	Intergenic	Intergenic	54708	NM_008300	15525	Mm.239865	NM_008300	ENSMUSG00000020361	Hspa4	70kDa|AI317151|APG-2|Hsp110|Hsp70RY|mKIAA4025	heat shock protein 4	protein-coding
16156	chr5	100604078	100604397	+	5.56	6.51	1.46	5.05	9.84e-12	7.14e-11	0	NA	Intergenic	Intergenic	-32032	NM_139198	231507	Mm.34609	NM_139198	ENSMUSG00000029322	Plac8	C15|D5Wsu111e	placenta-specific 8	protein-coding
488	chr7	112055807	112056580	+	8.07	9.03	3.98	5.04	1.96e-45	4.72e-43	0	NA	intron (NM_133758	intron 3 of 27)	intron (NM_133758	intron 3 of 27)	32687	NM_001357952	74996	Mm.16974	NM_133758	ENSMUSG00000059263	Usp47	4930502N04Rik|A630020C16Rik	ubiquitin specific peptidase 47	protein-coding
3029	chrX	157028913	157029509	+	7.01	7.96	2.92	5.04	2.09e-25	8.08e-24	0	NA	Intergenic	MLT1G1|LTR|ERVL-MaLR	386075	NM_011077	18675	Mm.2529	NM_011077	ENSMUSG00000057457	Phex	Gy|HPDR|HPDR1|Hyp|PEX	phosphate regulating endopeptidase homolog	X-linked	protein-coding
3289	chr5	54578541	54579019	+	7	7.96	2.91	5.04	1.17e-24	4.15e-23	0	NA	Intergenic	(CAGTG)n|Simple_repeat|Simple_repeat	228788	NR_038045	330086	Mm.254449	NM_177871	ENSMUSG00000105912	Gm10440	D130065D13	predicted gene 10440	ncRNA
4064	chr17	75275296	75275822	+	7.02	7.98	2.94	5.04	1.24e-22	3.58e-21	0	NA	intron (NM_001331235	intron 7 of 29)	intron (NM_001331235	intron 7 of 29)	96778	NM_001331237	268977	Mm.269747	NM_019919	ENSMUSG00000001870	Ltbp1	9430031G15Rik|9830146M04|Ltbp-1|Ltbp1L|TGF-beta1-BP-1|Tgfb|b2b1000Clo	latent transforming growth factor beta binding protein 1	protein-coding
22807	chrX	48321052	48321440	+	5.12	6.07	1.03	5.04	1.67e-09	8.6e-09	0	NA	Intergenic	Intergenic	-20112	NM_178782	320376	Mm.210146	NM_178782	ENSMUSG00000036959	Bcorl1	6720425J07Rik|B930011H20Rik	BCL6 co-repressor-like 1	protein-coding
29974	chrX	169095629	169095930	+	4.73	5.69	0.65	5.04	7.06e-08	2.76e-07	0	NA	intron (NR_109847	intron 1 of 14)	intron (NR_109847	intron 1 of 14)	-17099	NM_001287530	11856	Mm.441810	NM_009707	ENSMUSG00000031355	Arhgap6	AI504284|RhoGAPX-1	Rho GTPase activating protein 6	protein-coding
30033	chr10	120623963	120624767	+	7.68	8.64	3.59	5.04	7.28e-08	2.84e-07	0	NA	Intergenic	Intergenic	-141367	NR_038003	70874	Mm.427286	NR_038000	ENSMUSG00000044544	4921513I03Rik	-	RIKEN cDNA 4921513I03 gene	ncRNA
735	chr5	146703583	146704239	+	7.94	8.89	3.86	5.03	2.09e-40	3.33e-38	0	NA	Intergenic	Intergenic	91045	NM_011669	22217	Mm.167971	NM_011669	ENSMUSG00000029640	Usp12	Ubh1	ubiquitin specific peptidase 12	protein-coding
5280	chr2	122719168	122719642	+	6.56	7.52	2.49	5.03	2.26e-20	5.02e-19	0	NA	Intergenic	L1M4|LINE|L1	-16742	NM_011774	22785	Mm.27801	NM_011774	ENSMUSG00000005802	Slc30a4	Znt4|lm|znT-4	solute carrier family 30 (zinc transporter)	member 4	protein-coding
12650	chr5	66058860	66059230	+	5.77	6.72	1.69	5.03	1.83e-13	1.69e-12	0	NA	intron (NM_139065	intron 2 of 6)	intron (NM_139065	intron 2 of 6)	39134	NM_139065	245945	Mm.36863	NM_139065	ENSMUSG00000070780	Rbm47	9530077J19Rik	RNA binding motif protein 47	protein-coding
13310	chrX	93730788	93731204	+	5.9	6.86	1.83	5.03	4.24e-13	3.73e-12	0	NA	intron (NM_211138	intron 5 of 7)	intron (NM_211138	intron 5 of 7)	55884	NM_211138	236899	Mm.166467	NM_177546	ENSMUSG00000035246	Pcyt1b	AW045697|CTTbeta	phosphate cytidylyltransferase 1	choline	beta isoform	protein-coding
23460	chr3	66122911	66123226	+	5.08	6.04	1.01	5.03	2.49e-09	1.24e-08	0	NA	intron (NM_145820	intron 10 of 13)	intron (NM_145820	intron 10 of 13)	-96819	NM_008987	19288	Mm.276776	NM_008987	ENSMUSG00000027832	Ptx3	AI607804|TSG-14	pentraxin related gene	protein-coding
789	chr11	96747071	96748137	+	8.11	9.07	4.05	5.02	9.12e-40	1.35e-37	0	NA	intron (NM_001177898	intron 10 of 10)	intron (NM_001177898	intron 10 of 10)	29951	NM_028965	74479	Mm.270781	NM_028965	ENSMUSG00000020876	Snx11	4933439F10Rik|A930041K09Rik|AI117694	sorting nexin 11	protein-coding
3447	chr7	66178029	66178569	+	7	7.95	2.93	5.02	3.37e-24	1.15e-22	0	NA	Intergenic	Intergenic	68784	NM_001081163	269941	Mm.333916	NM_001081163	ENSMUSG00000032640	Chsy1	mKIAA0990	chondroitin sulfate synthase 1	protein-coding
5122	chrX	101368862	101369434	+	6.75	7.7	2.69	5.02	1.25e-20	2.87e-19	0	NA	Intergenic	Intergenic	-7228	NM_001302496	14618	Mm.21198	NM_008124	ENSMUSG00000047797	Gjb1	Cnx32|Cx32|connexin-32	gap junction protein	beta 1	protein-coding
5316	chrX	51407043	51407732	+	6.62	7.58	2.56	5.02	2.59e-20	5.72e-19	0	NA	intron (NM_015819	intron 1 of 1)	intron (NM_015819	intron 1 of 1)	-201397	NM_001310515	171170	Mm.295324	NM_134163	ENSMUSG00000036109	Mbnl3	A530038J18Rik|AI661274|CHCR|E430034C16Rik|MBLX|MBLX39|MBXL	muscleblind like splicing factor 3	protein-coding
5592	chr2	53102778	53103382	+	6.72	7.68	2.66	5.02	6.22e-20	1.3e-18	0	NA	intron (NM_172409	intron 11 of 26)	intron (NM_172409	intron 11 of 26)	88107	NM_018785	56194	Mm.257474	NM_018785	ENSMUSG00000061136	Prpf40a	2810012K09Rik|FBP-11|FBP11|Fnbp11|Fnbp3	pre-mRNA processing factor 40A	protein-coding
21323	chr10	117734203	117734420	+	5.33	6.28	1.26	5.02	6.36e-10	3.5e-09	0	NA	3' UTR (NM_029875	exon 5 of 5)	3' UTR (NM_029875	exon 5 of 5)	12047	NM_029875	215436	Mm.256753	NM_029875	ENSMUSG00000060181	Slc35e3	9330166G04Rik|AI481200	solute carrier family 35	member E3	protein-coding
1139	chr12	69279899	69280713	+	7.59	8.55	3.54	5.01	2.46e-35	2.53e-33	0	NA	intron (NM_178253	intron 12 of 12)	intron (NM_178253	intron 12 of 12)	-16375	NM_027117	69554	Mm.234368	NM_027117	ENSMUSG00000020978	Klhdc2	2310022K15Rik|D12Ertd522e|HCLP-1|LCP	kelch domain containing 2	protein-coding
4861	chr5	100294265	100294691	+	6.79	7.75	2.74	5.01	4.27e-21	1.03e-19	0	NA	Intergenic	Intergenic	-7892	NR_152163	545785		NR_152163		Gm45913	-	predicted gene	45913	ncRNA
7677	chr15	59467871	59468700	+	6.31	7.27	2.26	5.01	2.48e-17	3.78e-16	0	NA	intron (NM_026746	intron 4 of 6)	intron (NM_026746	intron 4 of 6)	94087	NM_001164604	68501	Mm.27762	NM_026746	ENSMUSG00000059586	Nsmce2	1110014D18Rik|AI661537	NSE2/MMS21 homolog	SMC5-SMC6 complex SUMO ligase	protein-coding
25746	chrX	134874720	134875070	+	5.02	5.97	0.97	5.01	8.86e-09	4.04e-08	0	NA	Intergenic	Intergenic	-65674	NM_001166398	67416	Mm.285969	NM_026139	ENSMUSG00000033436	Armcx2	3230401N03Rik|AI043003|ALEX2	armadillo repeat containing	X-linked 2	protein-coding
34468	chr3	144980448	144980967	+	7.01	7.97	2.96	5.01	4.42e-07	1.5e-06	0	NA	Intergenic	L2c|LINE|L2	-5662	NM_207208	99663	Mm.442050	NM_207208	ENSMUSG00000068547	Clca4a	9130020L07Rik|AI504701|Clca4|Clca6	chloride channel accessory 4A	protein-coding
2445	chr13	24889490	24890102	+	7.17	8.12	3.13	5	2.2e-27	1.05e-25	0	NA	intron (NM_001081051	intron 18 of 20)	intron (NM_001081051	intron 18 of 20)	-15804	NR_045182	73326	Mm.458692	NR_045182	ENSMUSG00000086796	4932702P03Rik	1700047I16Rik	RIKEN cDNA 4932702P03 gene	ncRNA
3628	chr19	56869482	56870190	+	6.96	7.91	2.91	5	9.87e-24	3.19e-22	0	NA	3' UTR (NM_031387	exon 26 of 26)	3' UTR (NM_031387	exon 26 of 26)	-4580	NM_172840	240675	Mm.129534	NM_172840	ENSMUSG00000025082	Vwa2	Amaco	von Willebrand factor A domain containing 2	protein-coding
4472	chr16	93186393	93187003	+	6.72	7.67	2.68	5	8.31e-22	2.18e-20	0	NA	Intergenic	Intergenic	166491	NR_040486	69857	Mm.81192	NR_040486	ENSMUSG00000100277	1810053B23Rik	1810008L18Rik|1810056K14Rik	RIKEN cDNA 1810053B23 gene	ncRNA
7547	chr7	25901818	25903411	+	8.79	9.74	4.74	5	1.76e-17	2.74e-16	0	NA	intron (NM_009999	intron 1 of 8)	intron (NM_009999	intron 1 of 8)	4956	NM_009999	13088	Mm.218749	NM_009999	ENSMUSG00000030483	Cyp2b10	Cyp2b|Cyp2b20|p16	cytochrome P450	family 2	subfamily b	polypeptide 10	protein-coding
13781	chr15	63557901	63558318	+	5.94	6.89	1.89	5	7.61e-13	6.48e-12	0	NA	Intergenic	Intergenic	-78501	NR_045279	432958	Mm.255105	NR_045279	ENSMUSG00000115520	Gm20740	-	predicted gene	20740	ncRNA
1141	chr3	152512270	152512917	+	7.85	8.81	3.82	4.99	2.6e-35	2.67e-33	0	NA	intron (NM_001081277	intron 8 of 13)	RMER15|LTR|ERVL	115909	NM_001287139	108946	Mm.379292	NM_198416	ENSMUSG00000039068	Zzz3	3110065C23Rik|6430567E01Rik|AA408566|AI481057|AW556059|R75514	zinc finger	ZZ domain containing 3	protein-coding
19471	chrX	71079347	71079700	+	5.28	6.23	1.24	4.99	1.69e-10	1.02e-09	0	NA	intron (NM_001081354	intron 1 of 6)	intron (NM_001081354	intron 1 of 6)	29267	NM_001081354	333639	Mm.371730	NM_001081354	ENSMUSG00000059401	Mamld1	G630014P10Rik	mastermind-like domain containing 1	protein-coding
30297	chr7	116465742	116465996	+	4.72	5.67	0.68	4.99	8.18e-08	3.17e-07	0	NA	Intergenic	Intergenic	-22411	NM_011083	18704	Mm.3810	NM_011083	ENSMUSG00000030660	Pik3c2a	Cpk-m|PI3KC2	phosphatidylinositol-4-phosphate 3-kinase catalytic subunit type 2 alpha	protein-coding
741	chr7	118769052	118769662	+	7.93	8.89	3.91	4.98	2.58e-40	4.08e-38	0	NA	intron (NM_027815	intron 9 of 30)	intron (NM_027815	intron 9 of 30)	29086	NM_027815	71517	Mm.213298	NM_027815	ENSMUSG00000030982	9030624J02Rik	2610029J22Rik	RIKEN cDNA 9030624J02 gene	protein-coding
1783	chr16	84698617	84699271	+	7.52	8.47	3.49	4.98	1.32e-30	8.66e-29	0	NA	Intergenic	Intergenic	-14079	NR_132106	100653389	Mm.261808	NR_132106	ENSMUSG00000097418	Mir155hg	Bic|Gm26667	Mir155 host gene (non-protein coding)	ncRNA
2977	chr13	64105711	64106225	+	7.02	7.98	2.99	4.98	1.33e-25	5.25e-24	0	NA	intron (NM_001001321	intron 8 of 11)	intron (NM_001001321	intron 8 of 11)	-16767	NM_008291	15487	Mm.5109	NM_008291	ENSMUSG00000033122	Hsd17b3	-	hydroxysteroid (17-beta) dehydrogenase 3	protein-coding
32380	chrX	9699992	9700247	+	4.7	5.66	0.68	4.98	1.97e-07	7.14e-07	0	NA	Intergenic	Intergenic	-37136	NM_025975	67117	Mm.29150	NM_025975	ENSMUSG00000031176	Dynlt3	2310075M16Rik|AU042796|Tcte1l	dynein light chain Tctex-type 3	protein-coding
32500	chr16	12742562	12742778	+	4.68	5.63	0.65	4.98	2.06e-07	7.44e-07	0	NA	Intergenic	Intergenic	-68720	NR_040507	75493	Mm.396146	NR_040507	ENSMUSG00000101565	1700003L19Rik	-	RIKEN cDNA 1700003L19 gene	ncRNA
4	chr3	126830984	126832136	+	10	10.95	5.98	4.97	2.73e-109	8.01e-105	0	NA	intron (NM_001025438	intron 14 of 18)	intron (NM_001025438	intron 14 of 18)	111826	NM_001034168	109676	Mm.220242	NM_178655	ENSMUSG00000032826	Ank2	100043364|AI835472|AW491075|Ank-2|Gm4392	ankyrin 2	brain	protein-coding
533	chr19	28646127	28647062	+	8	8.96	3.99	4.97	3e-44	6.59e-42	0	NA	intron (NM_175459	intron 2 of 10)	intron (NM_175459	intron 2 of 10)	-31630	NR_045330	320176	Mm.406716	NR_045330	ENSMUSG00000097735	D930032P07Rik	-	RIKEN cDNA D930032P07 gene	ncRNA
1002	chr1	33657452	33658208	+	7.77	8.72	3.75	4.97	6.38e-37	7.46e-35	0	NA	intron (NM_008922	intron 5 of 13)	intron (NM_008922	intron 5 of 13)	11964	NM_008922	19076	Mm.27705	NM_008922	ENSMUSG00000026134	Prim2	AI323589	DNA primase	p58 subunit	protein-coding
1342	chr19	43560156	43561100	+	7.56	8.52	3.55	4.97	1.14e-33	9.99e-32	0	NA	Intergenic	Intergenic	-36023	NM_010324	14718	Mm.19039	NM_010324	ENSMUSG00000025190	Got1	AI789014|Got-1|cAspAT|cCAT	glutamic-oxaloacetic transaminase 1	soluble	protein-coding
30320	chr11	88939734	88940011	+	4.72	5.68	0.71	4.97	8.29e-08	3.2e-07	0	NA	intron (NM_029023	intron 6 of 12)	intron (NM_029023	intron 6 of 12)	15570	NM_029023	74617	Mm.34126	NM_029023	ENSMUSG00000000278	Scpep1	2410018F01Rik|4833411K15Rik|AI957256|Risc	serine carboxypeptidase 1	protein-coding
12577	chr13	54527178	54527518	+	5.83	6.78	1.82	4.96	1.64e-13	1.53e-12	0	NA	intron (NM_176987	intron 2 of 9)	RSINE1|SINE|B4	23543	NM_176987	319719	Mm.376151	NM_176987	ENSMUSG00000043183	Simc1	4732471D19Rik	SUMO-interacting motifs containing 1	protein-coding
20950	chr1	186570024	186570328	+	5.23	6.18	1.23	4.96	4.96e-10	2.77e-09	0	NA	Intergenic	Intergenic	-11495	NR_131158	320449	Mm.404477	NR_131124	ENSMUSG00000103690	A730004F24Rik	-	RIKEN cDNA A730004F24 gene	ncRNA
49	chr17	64727113	64728510	+	8.93	9.88	4.94	4.95	8.65e-77	2.07e-73	0	NA	intron (NM_008549	intron 16 of 21)	intron (NM_008549	intron 16 of 21)	-39300	NR_105051	101202683	Mm.393309	NR_105051		Dreh	-	down-regulated in hepatocellular carcinoma	ncRNA
21032	chrX	16908656	16908966	+	5.26	6.21	1.26	4.95	5.18e-10	2.89e-09	0	NA	intron (NM_010883	intron 1 of 2)	intron (NM_010883	intron 1 of 2)	2963	NM_010883	17986	Mm.5014	NM_010883	ENSMUSG00000040138	Ndp	ND|Ndph	Norrie disease (pseudoglioma) (human)	protein-coding
41250	chr18	73541066	73541248	+	4.24	5.19	0.24	4.95	4.2e-06	1.19e-05	0	NA	Intergenic	Intergenic	-31548	NM_001039214	240396	Mm.24131	NM_001039214	ENSMUSG00000037253	Mex3c	A130001D14Rik|BC035207|BM-013|Rkhd2	mex3 RNA binding family member C	protein-coding
47191	chr14	76295515	76295962	+	6.21	7.17	2.22	4.95	2.01e-05	5e-05	0	NA	Intergenic	MTD|LTR|ERVL-MaLR	44276	NR_152108	72893	Mm.233565	NR_152108		2900040C04Rik	-	RIKEN cDNA 2900040C04 gene	ncRNA
388	chr11	72847865	72848942	+	8.15	9.11	4.17	4.94	6.06e-48	1.83e-45	0	NA	intron (NM_001045536	intron 11 of 54)	intron (NM_001045536	intron 11 of 54)	52177	NM_001045536	195018	Mm.272030	NM_001045536	ENSMUSG00000055670	Zzef1	8430405D05Rik|BC051585|C130099L13Rik|C85424|NSPA|mKIAA0399	zinc finger	ZZ-type with EF hand domain 1	protein-coding
423	chr18	62017252	62017857	+	8.24	9.19	4.25	4.94	7.64e-47	2.12e-44	0	NA	Intergenic	Intergenic	64479	NM_172628	225608	Mm.262320	NM_172628	ENSMUSG00000045629	Sh3tc2	D430044G18Rik	SH3 domain and tetratricopeptide repeats 2	protein-coding
12919	chr2	94449693	94450105	+	5.8	6.76	1.82	4.94	2.64e-13	2.4e-12	0	NA	Intergenic	MLT1H2|LTR|ERVL-MaLR	-11713	NM_007466	11800	Mm.181824	NM_007466	ENSMUSG00000027193	Api5	AAC-11|AI196452|API-5	apoptosis inhibitor 5	protein-coding
2110	chr9	45880989	45881524	+	7.24	8.19	3.27	4.93	6.95e-29	3.86e-27	0	NA	intron (NM_178709	intron 6 of 13)	intron (NM_178709	intron 6 of 13)	24926	NM_001361114	235315	Mm.220945	NM_178709	ENSMUSG00000042790	Rnf214	D130054N24Rik	ring finger protein 214	protein-coding
5529	chr13	107910285	107910965	+	6.63	7.58	2.65	4.93	5.22e-20	1.11e-18	0	NA	Intergenic	Intergenic	-20561	NM_145456	67263	Mm.490418	NM_145456		Zswim6	2900036G02Rik|mKIAA1577	zinc finger SWIM-type containing 6	protein-coding
7507	chr5	108051935	108052559	+	6.44	7.4	2.47	4.93	1.61e-17	2.51e-16	0	NA	Intergenic	Intergenic	-13427	NM_001253877	17765	Mm.257149	NM_013827	ENSMUSG00000029267	Mtf2	9230112N11Rik|AA537621|C76717|M96|Pcl2	metal response element binding transcription factor 2	protein-coding
9052	chr15	6059721	6060144	+	6.14	7.1	2.16	4.93	5.32e-16	6.89e-15	0	NA	Intergenic	Intergenic	-15228	NR_155428	105245876	Mm.128197	NR_155428		Gm41259	-	predicted gene	41259	ncRNA
25356	chr14	30982198	30982460	+	5.01	5.96	1.03	4.93	7.21e-09	3.34e-08	0	NA	exon (NM_011849	exon 13 of 15)	exon (NM_011849	exon 13 of 15)	-19064	NM_001165930	76485	Mm.8766	NM_029626	ENSMUSG00000021916	Glt8d1	2410004H05Rik|5430414N14Rik|AI450005	glycosyltransferase 8 domain containing 1	protein-coding
31948	chr11	88782556	88782837	+	4.66	5.61	0.68	4.93	1.64e-07	6.02e-07	0	NA	Intergenic	B1F|SINE|Alu	64053	NR_038058	193280	Mm.396842	NR_038058		C030037D09Rik	9330160M04	RIKEN cDNA C030037D09 gene	ncRNA
47	chr12	69813848	69815022	+	8.89	9.84	4.92	4.92	4.39e-77	1.09e-73	0	NA	intron (NM_201519	intron 26 of 30)	intron (NM_201519	intron 26 of 30)	-23728	NM_183294	71091	Mm.132325	NM_183294	ENSMUSG00000020990	Cdkl1	4933411O17Rik	cyclin-dependent kinase-like 1 (CDC2-related kinase)	protein-coding
57	chr13	5837066	5837973	+	8.93	9.89	4.97	4.92	1.47e-74	3.02e-71	0	NA	Intergenic	MLT1F1|LTR|ERVL-MaLR	20573	NR_045891	71867	Mm.179181	NR_045891	ENSMUSG00000100625	1700016G22Rik	-	RIKEN cDNA 1700016G22 gene	ncRNA
1116	chr9	106934887	106935494	+	7.73	8.68	3.77	4.92	1.34e-35	1.41e-33	0	NA	intron (NM_153413	intron 37 of 52)	intron (NM_153413	intron 37 of 52)	-43252	NM_029103	74840	Mm.29778	NM_029103	ENSMUSG00000032575	Manf	3230402M22Rik|AA407711|AA408789|AA673178|Armet|D17914|D18Mgi17	mesencephalic astrocyte-derived neurotrophic factor	protein-coding
3379	chr8	92706357	92706672	+	6.96	7.91	2.98	4.92	2.03e-24	7.05e-23	0	NA	Intergenic	Intergenic	32225	NM_001301137	64379	Mm.137247	NM_022428	ENSMUSG00000031738	Irx6	-	Iroquois homeobox 6	protein-coding
4837	chr3	152813850	152814284	+	6.79	7.74	2.82	4.92	3.81e-21	9.24e-20	0	NA	Intergenic	RMER15|LTR|ERVL	99967	NM_025662	329777	Mm.331447	NM_025662	ENSMUSG00000039047	Pigk	3000001O05Rik|Gm38470|PIG-K	phosphatidylinositol glycan anchor biosynthesis	class K	protein-coding
17485	chr1	166123809	166124077	+	5.43	6.38	1.46	4.92	3.38e-11	2.26e-10	0	NA	intron (NM_001033344	intron 2 of 5)	MLT1G3|LTR|ERVL-MaLR	3955	NM_001160049	240892	Mm.35315	NM_001033344	ENSMUSG00000026564	Dusp27	C130085G02Rik|Gm209	dual specificity phosphatase 27 (putative)	protein-coding
24105	chr11	63052104	63052345	+	5.19	6.15	1.23	4.92	3.62e-09	1.76e-08	0	NA	Intergenic	Intergenic	-9435	NM_027660	71062	Mm.23534	NM_027660	ENSMUSG00000042189	Tekt3	4933407G07Rik	tektin 3	protein-coding
24584	chr11	83891503	83891829	+	5.19	6.14	1.23	4.92	4.75e-09	2.26e-08	0	NA	intron (NM_009330	intron 6 of 8)	MER5A|DNA|hAT-Charlie	38706	NM_001291269	21410	Mm.7226	NM_009330	ENSMUSG00000020679	Hnf1b	HNF-1-beta|HNF-1B|HNF-1Beta|Hnf1beta|LFB3|Tcf-2|Tcf2|vHNF1	HNF1 homeobox B	protein-coding
27160	chr5	100397484	100397763	+	4.93	5.89	0.97	4.92	1.88e-08	8.11e-08	0	NA	intron (NM_001359349	intron 6 of 25)	B3A|SINE|B2	12346	NM_001359350	69162	Mm.18634	NM_026969	ENSMUSG00000035325	Sec31a	1810024J13Rik|ABP125|ABP130|AU042160|HSPC275|Sec31l1	Sec31 homolog A (S. cerevisiae)	protein-coding
32411	chr15	33499582	33499832	+	4.64	5.6	0.68	4.92	2e-07	7.23e-07	0	NA	intron (NM_176073	intron 7 of 7)	intron (NM_176073	intron 7 of 7)	-93768	NR_033608	73486	Mm.483393	NM_028551	ENSMUSG00000058101	1700084J12Rik	-	ribosomal protein L7-like 1 pseudogene	pseudo
520	chr5	91082927	91083588	+	8.18	9.13	4.22	4.91	1.61e-44	3.64e-42	0	NA	intron (NM_007950	intron 1 of 4)	intron (NM_007950	intron 1 of 4)	8640	NM_007950	13874	Mm.4791	NM_007950	ENSMUSG00000029377	Ereg	EPR	epiregulin	protein-coding
3338	chr11	97206938	97207668	+	7.13	8.08	3.17	4.91	1.59e-24	5.57e-23	0	NA	intron (NM_008942	intron 22 of 22)	intron (NM_008942	intron 22 of 22)	-19411	NM_008379	16211	Mm.251013	NM_008379	ENSMUSG00000001440	Kpnb1	AA409963|IPOB|Impnb	karyopherin (importin) beta 1	protein-coding
6954	chr5	77552045	77552988	+	6.89	7.84	2.94	4.91	3.76e-18	6.34e-17	0	NA	Intergenic	Intergenic	87028	NR_131050	69370	Mm.426881	NR_131050	ENSMUSG00000107232	1700017L05Rik	-	RIKEN cDNA 1700017L05 gene	ncRNA
3467	chr16	30442325	30442895	+	7.03	7.99	3.09	4.9	4.07e-24	1.38e-22	0	NA	Intergenic	Intergenic	-54080	NM_001128094	224088	Mm.8924	NM_001128094	ENSMUSG00000022533	Atp13a3	AU022875|Gm1745|Gm541|Gm542	ATPase type 13A3	protein-coding
12179	chr14	62812741	62813090	+	5.79	6.74	1.84	4.9	9.41e-14	9.06e-13	0	NA	non-coding (NR_045503	exon 3 of 7)	non-coding (NR_045503	exon 3 of 7)	-24775	NM_175546	268752	Mm.1960	NM_175546	ENSMUSG00000014547	Wdfy2	5830485M08|B130024L21Rik|ProF|ZFYVE22	WD repeat and FYVE domain containing 2	protein-coding
42642	chr19	32198692	32198859	+	4.23	5.18	0.28	4.9	6.09e-06	1.67e-05	0	NA	intron (NM_144792	intron 5 of 9)	intron (NM_144792	intron 5 of 9)	12238	NM_001168526	208449	Mm.329810	NM_144792	ENSMUSG00000040451	Sgms1	9530058O11Rik|AI841905|C80702|Mob|Sms1|Sor1|Tmem23	sphingomyelin synthase 1	protein-coding
93	chr1	84881200	84882421	+	8.84	9.79	4.91	4.89	5.63e-68	7.1e-65	0	NA	intron (NM_025386	intron 2 of 3)	intron (NM_025386	intron 2 of 3)	41969	NM_025386	66153	Mm.381192	NM_025386	ENSMUSG00000073633	Fbxo36	0610008D19Rik|1110020F21Rik|2410002G19Rik|D1Ertd757e	F-box protein 36	protein-coding
696	chr9	35467304	35468109	+	8.13	9.08	4.19	4.89	3.97e-41	6.69e-39	0	NA	intron (NM_021339	intron 7 of 18)	intron (NM_021339	intron 7 of 18)	15630	NM_021339	57810	Mm.80509	NM_021339	ENSMUSG00000038119	Cdon	CDO|Cd0|Orcam	cell adhesion molecule-related/down-regulated by oncogenes	protein-coding
732	chr8	64522317	64523385	+	8.08	9.03	4.14	4.89	1.85e-40	2.96e-38	0	NA	Intergenic	Intergenic	-8410	NR_030491	735270		NR_030491	ENSMUSG00000076042	Mir710	Mirn710|mmu-mir-710	microRNA 710	ncRNA
17263	chr9	118533310	118533571	+	5.41	6.36	1.48	4.89	2.72e-11	1.84e-10	0	NA	intron (NM_018748	intron 6 of 23)	intron (NM_018748	intron 6 of 23)	27122	NM_018748	54214	Mm.10409	NM_018748	ENSMUSG00000038708	Golga4	AI225887|AU019508|Olp-1	golgi autoantigen	golgin subfamily a	4	protein-coding
1401	chr14	79065457	79066175	+	7.64	8.59	3.7	4.88	3.57e-33	2.98e-31	0	NA	TTS (NM_173758)	TTS (NM_173758)	133374	NR_152203	100043765	Mm.435553	NR_152203	ENSMUSG00000115111	Gm4632	-	predicted gene 4632	ncRNA
4126	chr11	82020907	82021681	+	7.04	7.99	3.11	4.88	1.76e-22	5e-21	0	NA	Intergenic	Intergenic	-14283	NM_011333	20296	Mm.290320	NM_011333	ENSMUSG00000035385	Ccl2	AI323594|HC11|JE|MCAF|MCP-1|MCP1|SMC-CF|Scya2|Sigje	chemokine (C-C motif) ligand 2	protein-coding
17241	chrX	101472269	101472569	+	5.59	6.54	1.66	4.88	2.65e-11	1.8e-10	0	NA	Intergenic	Intergenic	23310	NM_013712	26549	Mm.46232	NM_013712	ENSMUSG00000031312	Itgb1bp2	Chordc3	integrin beta 1 binding protein 2	protein-coding
18063	chr15	44603772	44604083	+	5.45	6.41	1.53	4.88	5.42e-11	3.52e-10	0	NA	Intergenic	Intergenic	-15300	NM_001357690	55960	Mm.287896	NM_019480	ENSMUSG00000022339	Ebag9	AI835379|Rcas1	estrogen receptor-binding fragment-associated gene 9	protein-coding
27196	chr11	3318367	3318647	+	4.9	5.85	0.97	4.88	1.92e-08	8.26e-08	0	NA	intron (NR_045708	intron 4 of 5)	RMER6A|LTR|ERVK	9507	NR_045708	100302648	Mm.458664	NR_045708	ENSMUSG00000084941	Gm11944	-	predicted gene 11944	ncRNA
32630	chr1	59310330	59310605	+	4.61	5.56	0.68	4.88	2.16e-07	7.78e-07	0	NA	intron (NM_001356389	intron 9 of 13)	intron (NM_001356389	intron 9 of 13)	53561	NM_001033373	271697	Mm.297713	NM_001033373	ENSMUSG00000026023	Cdk15	Als2cr7|Pftk2	cyclin-dependent kinase 15	protein-coding
43210	chr5	65620192	65620377	+	4.21	5.16	0.28	4.88	7.12e-06	1.93e-05	0	NA	intron (NM_001081321	intron 29 of 31)	B1_Mur4|SINE|Alu	77572	NM_001081321	71521	Mm.278974	NM_027818	ENSMUSG00000029202	Pds5a	9030416H16Rik|E230024D05Rik|mKIAA0648	PDS5 cohesin associated factor A	protein-coding
542	chr8	34188606	34189660	+	8.08	9.04	4.16	4.87	4.63e-44	1e-41	0	NA	Intergenic	Intergenic	-22421	NR_105820	102465211		NR_105820	ENSMUSG00000098785	Mir6395	Gm27561|mmu-mir-6395	microRNA 6395	ncRNA
1091	chr6	119392736	119393408	+	7.68	8.63	3.77	4.87	7.09e-36	7.62e-34	0	NA	intron (NM_197985	intron 1 of 7)	intron (NM_197985	intron 1 of 7)	-4338	NM_001355692	68465	Mm.291826	NM_197985	ENSMUSG00000030168	Adipor2	1110001I14Rik|ADCR2|AI115388|AW554121|D6Ucla1e|Paqr2	adiponectin receptor 2	protein-coding
1591	chr2	92004510	92005077	+	7.58	8.53	3.65	4.87	8.36e-32	6.16e-30	0	NA	intron (NM_011957	intron 1 of 11)	intron (NM_011957	intron 1 of 11)	19377	NM_011957	26427	Mm.10353	NM_011957	ENSMUSG00000027230	Creb3l1	Oasis	cAMP responsive element binding protein 3-like 1	protein-coding
11828	chr5	67393927	67394331	+	6.03	6.98	2.11	4.87	5.54e-14	5.49e-13	0	NA	3' UTR (NM_001164806	exon 5 of 5)	3' UTR (NM_001164806	exon 5 of 5)	33670	NM_001164806	666938	Mm.101339	NM_001164806	ENSMUSG00000092060	Bend4	D330027G24Rik|EG666938	BEN domain containing 4	protein-coding
14618	chr1	78387910	78388408	+	5.72	6.67	1.8	4.87	1.95e-12	1.56e-11	0	NA	intron (NM_001004173	intron 2 of 4)	intron (NM_001004173	intron 2 of 4)	77813	NM_001004173	433323	Mm.276248	NM_001004173	ENSMUSG00000032908	Sgpp2	SPPase2|Spp2	sphingosine-1-phosphate phosphotase 2	protein-coding
17520	chr8	124390432	124390764	+	5.41	6.37	1.49	4.87	3.43e-11	2.3e-10	0	NA	intron (NM_171824	intron 1 of 6)	MTEb|LTR|ERVL-MaLR	43338	NM_171824	209966	Mm.234233	NM_171824	ENSMUSG00000050751	Pgbd5	2900019M05Rik|AI854313	piggyBac transposable element derived 5	protein-coding
33752	chrX	150468321	150468593	+	4.57	5.52	0.65	4.87	3.34e-07	1.16e-06	0	NA	Intergenic	ORR1C2|LTR|ERVL-MaLR	-9307	NM_001164683	382245	Mm.277309	NM_001164683	ENSMUSG00000041353	Tmem29	2700081K05Rik|6330540D07Rik|CXorf44-like	transmembrane protein 29	protein-coding
35320	chr3	131867358	131867622	+	4.57	5.52	0.65	4.87	6.1e-07	2.02e-06	0	NA	Intergenic	Intergenic	-217802	NM_020265	56811	Mm.103593	NM_020265	ENSMUSG00000028031	Dkk2	-	dickkopf WNT signaling pathway inhibitor 2	protein-coding
426	chr12	88368409	88369098	+	8.07	9.02	4.16	4.86	8.53e-47	2.35e-44	0	NA	non-coding (NR_045888	exon 2 of 3)	non-coding (NR_045888	exon 2 of 3)	7971	NM_001361598	72113	Mm.181387	NM_028105	ENSMUSG00000021044	Adck1	2610005A10Rik	aarF domain containing kinase 1	protein-coding
902	chr3	94680612	94681443	+	7.99	8.94	4.08	4.86	2.16e-38	2.8e-36	0	NA	Intergenic	MMERGLN-int|LTR|ERV1	-12546	NM_019414	20342	Mm.225405	NM_019414	ENSMUSG00000068877	Selenbp2	AP56|Lpsb2	selenium binding protein 2	protein-coding
1751	chr13	58458685	58459378	+	7.4	8.35	3.49	4.86	8.04e-31	5.39e-29	0	NA	Intergenic	Intergenic	-55688	NM_001301341	15387	Mm.142872	NM_025279	ENSMUSG00000021546	Hnrnpk	Hnrpk|KBBP|NOVA	heterogeneous nuclear ribonucleoprotein K	protein-coding
3886	chr8	111464489	111464933	+	6.97	7.92	3.06	4.86	4.53e-23	1.37e-21	0	NA	intron (NM_001170742	intron 20 of 25)	intron (NM_001170742	intron 20 of 25)	14511	NR_105819
5363	chr18	39741243	39741580	+	6.82	7.77	2.91	4.86	3.1e-20	6.78e-19	0	NA	Intergenic	Intergenic	-32086	NM_011033	18459	Mm.9493	NM_011033	ENSMUSG00000051732	Pabpc2	Pabp|Pabp+|Pabp2	poly(A) binding protein	cytoplasmic 2	protein-coding
8724	chr9	78626305	78626681	+	6.17	7.12	2.25	4.86	2.69e-16	3.62e-15	0	NA	intron (NM_153098	intron 2 of 32)	intron (NM_153098	intron 2 of 32)	10947	NM_153098	235505	Mm.32955	NM_153098	ENSMUSG00000046186	Cd109	9930012E15Rik|AI480638|GARP	CD109 antigen	protein-coding
9487	chr13	63657177	63657553	+	6.14	7.09	2.24	4.86	1.25e-15	1.55e-14	0	NA	Intergenic	Intergenic	76933	NR_126476	75522	Mm.54259	NR_126476	ENSMUSG00000113825	1700024I08Rik	-	RIKEN cDNA 1700024I08 gene	ncRNA
9695	chr12	27468123	27468501	+	6.25	7.2	2.35	4.86	1.87e-15	2.26e-14	0	NA	Intergenic	Intergenic	-125594	NM_009234	20666	Mm.41702	NM_009234	ENSMUSG00000063632	Sox11	1110038H03Rik|6230403H02Rik|AI836553|end1	SRY (sex determining region Y)-box 11	protein-coding
13335	chr4	109444511	109444751	+	5.87	6.82	1.97	4.86	4.36e-13	3.83e-12	0	NA	3' UTR (NM_153392	exon 18 of 18)	3' UTR (NM_153392	exon 18 of 18)	28984	NM_001145948	230603	Mm.33091	NM_153392	ENSMUSG00000028555	Ttc39a	4922503N01Rik	tetratricopeptide repeat domain 39A	protein-coding
23034	chr16	92228349	92228829	+	5.13	6.08	1.23	4.86	1.92e-09	9.76e-09	0	NA	Intergenic	Intergenic	-63800	NM_134110	246133	Mm.156736	NM_134110	ENSMUSG00000039672	Kcne2	2200002I16Rik|AW048273|MiRP1	potassium voltage-gated channel	Isk-related subfamily	gene 2	protein-coding
27518	chrX	77645304	77645599	+	4.88	5.83	0.97	4.86	2.21e-08	9.44e-08	0	NA	intron (NM_020601	intron 4 of 15)	intron (NM_020601	intron 4 of 15)	30001	NM_001101585	628893	Mm.477437	NM_001101585		Cldn34-ps	EG628893|Gm6927	claudin 34	pseudogene	protein-coding
44098	chr17	80490001	80490646	+	6.71	7.66	2.8	4.86	9.14e-06	2.43e-05	0	NA	Intergenic	Intergenic	-9870	NM_009231	20662	Mm.60975	NM_009231	ENSMUSG00000024241	Sos1	4430401P03Rik|9630010N06|AI449023	SOS Ras/Rac guanine nucleotide exchange factor 1	protein-coding
121	chr6	143640394	143641163	+	8.86	9.81	4.96	4.85	4.21e-64	4.08e-61	0	NA	intron (NR_045732	intron 1 of 4)	intron (NR_045732	intron 1 of 4)	10510	NR_045732	73425	Mm.417844	NR_045732	ENSMUSG00000086887	1700060C16Rik	-	RIKEN cDNA 1700060C16 gene	ncRNA
1779	chr4	124829456	124830292	+	7.59	8.54	3.7	4.85	1.27e-30	8.38e-29	0	NA	intron (NM_008636	intron 6 of 10)	intron (NM_008636	intron 6 of 10)	20690	NM_001347196	68920	Mm.272397	NM_001142727	ENSMUSG00000078570	1110065P20Rik	C530005M16Rik	RIKEN cDNA 1110065P20 gene	protein-coding
2288	chr8	64707193	64707949	+	7.21	8.17	3.32	4.85	5.3e-28	2.72e-26	0	NA	Intergenic	RLTR48A|LTR|ERV1	-14462	NM_013494	12876	Mm.31395	NM_013494	ENSMUSG00000037852	Cpe	CPH|Cph-1|Cph1|NF-alpha1|R74677|fat	carboxypeptidase E	protein-coding
28145	chr10	68512499	68512719	+	4.87	5.82	0.97	4.85	3.03e-08	1.26e-07	0	NA	intron (NM_028491	intron 4 of 7)	RMER15|LTR|ERVL	29266	NM_028491	73287	Mm.141830	NM_028491	ENSMUSG00000019945	Cabcoco1	1700040L02Rik	ciliary associated calcium binding coiled-coil 1	protein-coding
33835	chr18	52602578	52602894	+	4.61	5.56	0.71	4.85	3.47e-07	1.2e-06	0	NA	Intergenic	Intergenic	-13179	NM_001360984	66758	Mm.251599	NM_025749	ENSMUSG00000046886	Zfp474	4933409D10Rik|Znf474	zinc finger protein 474	protein-coding
34141	chrX	9179050	9179340	+	4.6	5.55	0.71	4.85	3.9e-07	1.34e-06	0	NA	Intergenic	UCON29|DNA|PiggyBac?	-20778	NM_173414	236285	Mm.245119	NM_173414	ENSMUSG00000047344	Lancl3	6030463G20Rik	LanC lantibiotic synthetase component C-like 3 (bacterial)	protein-coding
62266	chr7	72110604	72110988	+	6.44	7.39	2.54	4.85	0.000465	0.000875	0.000875	NA	intron (NM_001024703	intron 19 of 22)	intron (NM_001024703	intron 19 of 22)	-148778	NR_126483	102640608	Mm.399138	NR_126483	ENSMUSG00000108480	Gm36633	-	predicted gene	36633	ncRNA
106	chr9	59537402	59538524	+	8.95	9.9	5.07	4.84	8.43e-66	9.32e-63	0	NA	Intergenic	Intergenic	-1577	NM_010421	15211	Mm.2284	NM_010421	ENSMUSG00000025232	Hexa	Hex-1	hexosaminidase A	protein-coding
4011	chr9	96765311	96765856	+	6.97	7.92	3.08	4.84	8.69e-23	2.54e-21	0	NA	promoter-TSS (NR_102293)	promoter-TSS (NR_102293)	21	NR_102295	319707	Mm.392191	NR_102293	ENSMUSG00000101581	C430002N11Rik	-	RIKEN cDNA C430002N11 gene	ncRNA
4429	chr19	29835359	29836054	+	6.8	7.75	2.91	4.84	6.74e-22	1.79e-20	0	NA	Intergenic	Intergenic	-22732	NM_177721	240614	Mm.125503	NM_177721	ENSMUSG00000074909	Ranbp6	C630001B19	RAN binding protein 6	protein-coding
4487	chr1	71923731	71924097	+	6.72	7.67	2.84	4.84	8.75e-22	2.28e-20	0	NA	Intergenic	MLT1F|LTR|ERVL-MaLR	35802	NR_027659	667931	Mm.214128	NR_027658	ENSMUSG00000099707	Gm8883	EG667931|Gm554	predicted gene 8883	ncRNA
6698	chr5	136570150	136570586	+	6.48	7.43	2.59	4.84	1.74e-18	3.05e-17	0	NA	Intergenic	Intergenic	-2878	NM_001291238	13047	Mm.320317	NM_009986	ENSMUSG00000029705	Cux1	CDP|Cutl1|Cux|Cux-1	cut-like homeobox 1	protein-coding
15711	chrX	69331402	69331707	+	5.59	6.54	1.71	4.84	6.25e-12	4.66e-11	0	NA	Intergenic	L1_Mur2|LINE|L1	-28777	NM_008032	14266	Mm.466576	NM_008032	ENSMUSG00000031189	Aff2	FMR2P|Fmr2|Ox19|Oxh	AF4/FMR2 family	member 2	protein-coding
18764	chr12	81150898	81151527	+	8.64	9.59	4.75	4.84	9.71e-11	6.07e-10	0	NA	intron (NM_001146217	intron 6 of 12)	intron (NM_001146217	intron 6 of 12)	-14939	NR_037227	100526532		NR_037227	ENSMUSG00000092673	Mir3067	mir-3067|mmu-mir-3067	microRNA 3067	ncRNA
40461	chr16	92546228	92546450	+	4.54	5.49	0.65	4.84	3.3e-06	9.55e-06	0	NA	Intergenic	Intergenic	48192	NM_172469	209195	Mm.44747	NM_172469	ENSMUSG00000022949	Clic6	5730466J16Rik|AL022908|AW045520|CLIC1L	chloride intracellular channel 6	protein-coding
275	chr4	52660377	52661283	+	8.32	9.27	4.44	4.83	4.52e-53	1.94e-50	0	NA	Intergenic	ORR1D1|LTR|ERVL-MaLR	53624	NM_001356293	68274	Mm.85045	NM_026652	ENSMUSG00000028314	Toporsl	4930547C10Rik	topoisomerase I binding	arginine/serine-rich like	protein-coding
2985	chr1	53728523	53729331	+	7.06	8.01	3.18	4.83	1.42e-25	5.56e-24	0	NA	Intergenic	Intergenic	-22143	NM_001252070	627872	Mm.184692	NM_001252070	ENSMUSG00000096141	Dnah7a	Dnahc7|Dnahc7a|Gm992	dynein	axonemal	heavy chain 7A	protein-coding
2998	chr16	93246739	93247463	+	7.59	8.54	3.71	4.83	1.6e-25	6.25e-24	0	NA	Intergenic	Intergenic	106088	NR_040486	69857	Mm.81192	NR_040486	ENSMUSG00000100277	1810053B23Rik	1810008L18Rik|1810056K14Rik	RIKEN cDNA 1810053B23 gene	ncRNA
4909	chr5	91073489	91075497	+	9.81	10.76	5.92	4.83	5.37e-21	1.28e-19	0	NA	promoter-TSS (NM_007950)	promoter-TSS (NM_007950)	-124	NM_007950	13874	Mm.4791	NM_007950	ENSMUSG00000029377	Ereg	EPR	epiregulin	protein-coding
7834	chr4	107363637	107363991	+	6.25	7.2	2.37	4.83	3.52e-17	5.27e-16	0	NA	Intergenic	B3|SINE|B2	-3970	NM_028355	72787	Mm.28478	NM_028355	ENSMUSG00000028614	Ndc1	2810475A17Rik|AI450313|Tmem48|sks	NDC1 transmembrane nucleoporin	protein-coding
9246	chr9	73472593	73473008	+	6.15	7.1	2.27	4.83	7.76e-16	9.84e-15	0	NA	Intergenic	Intergenic	359331	NM_198609	225215	Mm.379366	NM_198609	ENSMUSG00000032215	Rsl24d1	2410159K22Rik	ribosomal L24 domain containing 1	protein-coding
28762	chr14	23131440	23132677	+	8.36	9.31	4.48	4.83	4.08e-08	1.66e-07	0	NA	Intergenic	Intergenic	-37487	NR_033550	791307	Mm.364384	NR_033550	ENSMUSG00000068680	Gm10248	-	predicted gene 10248	ncRNA
36789	chrX	142481473	142481727	+	4.53	5.48	0.65	4.83	1.02e-06	3.24e-06	0	NA	Intergenic	Intergenic	-91065	NM_207625	50790	Mm.391337	NM_019477	ENSMUSG00000031278	Acsl4	9430020A05Rik|ACS4|AU018108|Facl4|Lacs4	acyl-CoA synthetase long-chain family member 4	protein-coding
574	chr9	96582790	96583776	+	8.09	9.04	4.22	4.82	2.83e-43	5.77e-41	0	NA	intron (NM_053268	intron 5 of 23)	intron (NM_053268	intron 5 of 23)	48220	NM_053268	114713	Mm.124502	NM_053268	ENSMUSG00000032413	Rasa2	5430433H21Rik|AA517451|AU023900|GAP1m	RAS p21 protein activator 2	protein-coding
3316	chr13	99830146	99830715	+	7.06	8.01	3.19	4.82	1.44e-24	5.08e-23	0	NA	Intergenic	Intergenic	70253	NM_013732	27220	Mm.75498	NM_013732	ENSMUSG00000021647	Cartpt	Cart	CART prepropeptide	protein-coding
4781	chr11	31974766	31975195	+	6.72	7.67	2.85	4.82	2.96e-21	7.27e-20	0	NA	intron (NM_026262	intron 2 of 4)	intron (NM_026262	intron 2 of 4)	9347	NM_026262	67592	Mm.78654	NM_026262	ENSMUSG00000020299	4930524B15Rik	-	RIKEN cDNA 4930524B15 gene	protein-coding
28865	chr11	96017800	96018439	+	7.32	8.27	3.45	4.82	4.29e-08	1.74e-07	0	NA	Intergenic	Intergenic	-6426	NM_008119	14607	Mm.248452	NM_008119	ENSMUSG00000014351	Gip	-	gastric inhibitory polypeptide	protein-coding
33994	chrX	155378074	155378357	+	4.57	5.52	0.71	4.82	3.68e-07	1.27e-06	0	NA	Intergenic	Intergenic	-39755	NM_016764	53381	Mm.247542	NM_016764	ENSMUSG00000025289	Prdx4	AOE372|Prx-iv|Prx4|TRANK	peroxiredoxin 4	protein-coding
56794	chr2	23213641	23214016	+	6.31	7.26	2.44	4.82	0.000166	0.000343	0.000343	NA	intron (NM_027635	intron 3 of 10)	intron (NM_027635	intron 3 of 10)	6352	NM_027635	70981	Mm.314026	NM_027635	ENSMUSG00000026774	4931423N10Rik	-	RIKEN cDNA 4931423N10 gene	protein-coding
60520	chr13	13552066	13552400	+	6.31	7.26	2.44	4.82	0.000337	0.000654	0.000654	NA	Intergenic	Intergenic	-38176	NM_010748	17101	Mm.342337	NM_010748	ENSMUSG00000019726	Lyst	D13Sfk13|beige|bg	lysosomal trafficking regulator	protein-coding
728	chr1	156639314	156640099	+	7.88	8.83	4.03	4.81	1.64e-40	2.63e-38	0	NA	intron (NM_001136104	intron 10 of 12)	intron (NM_001136104	intron 10 of 12)	34633	NM_023141	30935	Mm.206737	NM_023141	ENSMUSG00000060519	Tor3a	Adir	torsin family 3	member A	protein-coding
1745	chr5	76962412	76963188	+	7.52	8.47	3.66	4.81	7.59e-31	5.1e-29	0	NA	intron (NM_025939	intron 6 of 8)	intron (NM_025939	intron 6 of 8)	-11222	NM_172146	231327	Mm.202337	NM_172146	ENSMUSG00000029246	Ppat	5730454C12Rik|AA408689|AA675351|AI507113|C79945	phosphoribosyl pyrophosphate amidotransferase	protein-coding
2350	chr15	97693272	97693922	+	7.23	8.17	3.37	4.81	8.37e-28	4.17e-26	0	NA	intron (NM_028003	intron 6 of 16)	intron (NM_028003	intron 6 of 16)	12225	NM_028003	71919	Mm.12255	NM_028003	ENSMUSG00000022466	Rpap3	2310042P20Rik|D15Ertd682e	RNA polymerase II associated protein 3	protein-coding
4234	chr10	40551655	40552304	+	6.8	7.75	2.94	4.81	2.87e-22	7.95e-21	0	NA	Intergenic	Intergenic	-18383	NM_027572	70840	Mm.332570	NM_027572	ENSMUSG00000019834	Slc22a16	4921504E14Rik|CT2|FLIPT2|OCT6|OKB1	solute carrier family 22 (organic cation transporter)	member 16	protein-coding
4613	chr11	84062778	84063117	+	6.83	7.78	2.97	4.81	1.52e-21	3.87e-20	0	NA	intron (NM_019819	intron 1 of 2)	intron (NM_019819	intron 1 of 2)	5410	NM_019819	56405	Mm.240885	NM_019819	ENSMUSG00000018648	Dusp14	1110014C10Rik|2310042C07Rik|D11Ertd395e|MKP-L|Mkp6	dual specificity phosphatase 14	protein-coding
5418	chr1	168584123	168584574	+	6.71	7.66	2.85	4.81	3.75e-20	8.12e-19	0	NA	Intergenic	Intergenic	93705	NR_105766	102465178		NR_105766	ENSMUSG00000098407	Mir6348	Gm27412|mmu-mir-6348	microRNA 6348	ncRNA
6395	chr15	11524392	11524818	+	6.45	7.4	2.59	4.81	7.26e-19	1.33e-17	0	NA	Intergenic	Intergenic	-124947	NM_033074	110960	Mm.286061	NM_033074	ENSMUSG00000022241	Tars	D15Wsu59e|ThrRS	threonyl-tRNA synthetase	protein-coding
7906	chr4	108887490	108887973	+	6.41	7.36	2.55	4.81	4.14e-17	6.13e-16	0	NA	intron (NM_023537	intron 1 of 4)	intron (NM_023537	intron 1 of 4)	8661	NM_023537	69908	Mm.41580	NM_023537	ENSMUSG00000003411	Rab3b	2610528C18Rik	RAB3B	member RAS oncogene family	protein-coding
12164	chr5	43799488	43799951	+	5.88	6.83	2.02	4.81	9.22e-14	8.88e-13	0	NA	Intergenic	Intergenic	-17570	NM_178729	242960	Mm.25794	NM_178729	ENSMUSG00000039753	Fbxl5	Fbl4|Fir4	F-box and leucine-rich repeat protein 5	protein-coding
31260	chr9	78045103	78045695	+	7.79	8.74	3.93	4.81	1.23e-07	4.63e-07	0	NA	Intergenic	B1F2|SINE|Alu	-6559	NM_008103	14531	Mm.1400	NM_008103	ENSMUSG00000023333	Gcm1	GCMa|Gcm-rs2|Gcm1-rs1|glide	glial cells missing homolog 1	protein-coding
909	chr10	85739378	85740275	+	7.83	8.78	3.98	4.8	2.46e-38	3.17e-36	0	NA	Intergenic	RMER15|LTR|ERVL	-132005	NM_133993	103136	Mm.18834	NM_133993	ENSMUSG00000001785	Pwp1	2310058A11Rik|2610205J09Rik|AI098170|AL022879|AV083409|AW550690	PWP1 homolog	endonuclein	protein-coding
1263	chr11	85367650	85368431	+	7.72	8.67	3.86	4.8	2.35e-34	2.18e-32	0	NA	intron (NM_138681	intron 5 of 25)	Tigger7|DNA|TcMar-Tigger	14876	NM_138681	192197	Mm.209989	NM_138681	ENSMUSG00000059439	Bcas3	1500019F07Rik|2610028P08Rik|AU021018|BC028339|K20D4|rudhira	breast carcinoma amplified sequence 3	protein-coding
1896	chr19	27351480	27352121	+	7.35	8.3	3.49	4.8	5.29e-30	3.27e-28	0	NA	Intergenic	MLT2B3|LTR|ERVL	29181	NM_183179	240595	Mm.269759	NM_183179	ENSMUSG00000047298	Kcnv2	KV11.1	potassium channel	subfamily V	member 2	protein-coding
2858	chr6	31332258	31332851	+	7.05	8	3.19	4.8	5.85e-26	2.4e-24	0	NA	intron (NR_040259	intron 4 of 5)	intron (NR_040259	intron 4 of 5)	66219	NR_040300	100503869	Mm.370532	NR_040300	ENSMUSG00000086212	Mkln1os	Gm13845	muskelin 1	intracellular mediator containing kelch motifs	opposite strand	ncRNA
4312	chr3	122343438	122344065	+	6.89	7.84	3.04	4.8	4.18e-22	1.14e-20	0	NA	Intergenic	Intergenic	-50048	NR_030439	791077		NR_030439	ENSMUSG00000076456	Mir760	Mirn760|mir-760|mmu-mir-760	microRNA 760	ncRNA
15669	chr15	81137039	81138086	+	9.04	9.99	5.19	4.8	6.03e-12	4.51e-11	0	NA	intron (NM_001082536	intron 1 of 13)	L1M4b|LINE|L1	-32515	NM_153049	223701	Mm.439814	NM_153049	ENSMUSG00000042292	Mkl1	AMKL|Bsac|Mal|Mrtf-A	MKL (megakaryoblastic leukemia)/myocardin-like 1	protein-coding
27250	chr3	93501469	93501903	+	4.86	5.81	1.01	4.8	1.97e-08	8.48e-08	0	NA	Intergenic	Intergenic	-18810	NM_016740	20195	Mm.280038	NM_016740	ENSMUSG00000027907	S100a11	EMAPI|Emap1|S100a14|S100c|cal	S100 calcium binding protein A11	protein-coding
28935	chr6	143888622	143888896	+	4.84	5.79	0.99	4.8	4.4e-08	1.79e-07	0	NA	intron (NM_001113559	intron 8 of 13)	intron (NM_001113559	intron 8 of 13)	58347	NM_001347506	20678	Mm.1752	NM_011444	ENSMUSG00000041540	Sox5	A730017D01Rik|AI528773	SRY (sex determining region Y)-box 5	protein-coding
35189	chr16	90483399	90483614	+	4.5	5.45	0.65	4.8	5.78e-07	1.93e-06	0	NA	intron (NM_015755	intron 8 of 10)	intron (NM_015755	intron 8 of 10)	97109	NM_015755	26559	Mm.125874	NM_015755	ENSMUSG00000053414	Hunk	Bstk1|Mak-v	hormonally upregulated Neu-associated kinase	protein-coding
2629	chr15	88936760	88937440	+	7.15	8.1	3.31	4.79	1.09e-26	4.87e-25	0	NA	intron (NM_001357736	intron 2 of 11)	intron (NM_001357736	intron 2 of 11)	17318	NM_001357736	239591	Mm.86807	NM_172818	ENSMUSG00000022388	Ttll8	1700019P01Rik|4933401B17	tubulin tyrosine ligase-like family	member 8	protein-coding
5847	chr11	69259966	69260458	+	6.71	7.66	2.87	4.79	1.44e-19	2.88e-18	0	NA	Intergenic	Intergenic	-23190	NM_008192	14919	Mm.291816	NM_008192	ENSMUSG00000020890	Gucy2e	GC-E|GC1|ROS-GC1	guanylate cyclase 2e	protein-coding
6200	chr19	20365983	20366377	+	6.53	7.48	2.69	4.79	4.06e-19	7.69e-18	0	NA	Intergenic	Intergenic	24491	NM_010730	16952	Mm.248360	NM_010730	ENSMUSG00000024659	Anxa1	Anx-1|Anx-A1|C430014K04Rik|Lpc-1|Lpc1	annexin A1	protein-coding
7267	chr3	103998751	103999077	+	6.32	7.26	2.48	4.79	9.09e-18	1.47e-16	0	NA	intron (NM_013629	intron 14 of 18)	intron (NM_013629	intron 14 of 18)	-30598	NR_030676	100125931	Mm.400392	NR_030676	ENSMUSG00000089998	Phtf1os	A130049A11Rik	putative homeodomain transcription factor 1	opposite strand	ncRNA
8969	chr11	83343600	83343994	+	6.11	7.06	2.27	4.79	4.6e-16	6.01e-15	0	NA	intron (NM_027915	intron 12 of 20)	MTE2b|LTR|ERVL-MaLR	41100	NM_027915	71770	Mm.39053	NM_027915	ENSMUSG00000035152	Ap2b1	1300012O03Rik|AI788979|AP105B	adaptor-related protein complex 2	beta 1 subunit	protein-coding
14707	chrX	68412485	68412920	+	5.79	6.74	1.95	4.79	2.1e-12	1.68e-11	0	NA	Intergenic	RLTR1F_Mm|LTR|ERVK	265697	NR_033481	100038638	Mm.368431	NR_033481	ENSMUSG00000096946	Fmr1os	Asfmr1|Gm10474	fragile X mental retardation syndrome 1	opposite strand	ncRNA
22353	chr19	22672977	22673218	+	5.13	6.08	1.28	4.79	1.24e-09	6.49e-09	0	NA	intron (NM_177341	intron 1 of 26)	Lx8|LINE|L1	-19522	NM_001035245	226025	Mm.131943	NM_177341	ENSMUSG00000052387	Trpm3	6330504P12Rik|9330180E14|AU018608|B930001P07Rik|LTRPC3|MLSN2	transient receptor potential cation channel	subfamily M	member 3	protein-coding
39584	chr5	110604367	110604586	+	4.49	5.44	0.65	4.79	2.51e-06	7.42e-06	0	NA	intron (NR_104449	intron 1 of 5)	intron (NR_104449	intron 1 of 5)	971	NM_001122639	231605	Mm.275748	NM_198306	ENSMUSG00000033316	Galnt9	GalNAc-T9	polypeptide N-acetylgalactosaminyltransferase 9	protein-coding
45559	chr8	93036591	93036791	+	4.09	5.04	0.24	4.79	1.35e-05	3.47e-05	0	NA	intron (NM_001013764	intron 4 of 13)	B3A|SINE|B2	11501	NM_001013764	244595	Mm.390089	NM_001013764	ENSMUSG00000071047	Ces1a	Ces1l|EG244595|Gm4976	carboxylesterase 1A	protein-coding
421	chr10	56486350	56487084	+	8.17	9.12	4.34	4.78	6.59e-47	1.84e-44	0	NA	Intergenic	MLT2F|LTR|ERVL	54736	NR_152768	102640560	Mm.417249	NR_152768		Gm36595	-	predicted gene	36595	ncRNA
960	chr11	19835127	19835807	+	7.92	8.86	4.08	4.78	1.36e-37	1.66e-35	0	NA	Intergenic	Intergenic	-88975	NM_033523	114716	Mm.266627	NM_033523	ENSMUSG00000045671	Spred2	C79158	sprouty-related	EVH1 domain containing 2	protein-coding
1331	chr17	44717860	44718956	+	7.55	8.5	3.72	4.78	9.1e-34	8.02e-32	0	NA	intron (NR_073425	intron 2 of 5)	intron (NR_073425	intron 2 of 5)	17768	NR_073425	12393	Mm.391013	NM_009820	ENSMUSG00000039153	Runx2	AML3|Cbf|Cbfa-1|Cbfa1|LS3|Osf2|PEBP2aA|Pebp2a1|Pebpa2a	runt related transcription factor 2	protein-coding
1563	chr2	75114214	75114955	+	7.85	8.8	4.02	4.78	5.97e-32	4.48e-30	0	NA	Intergenic	Intergenic	288772	NM_016804	53375	Mm.292613	NM_016804	ENSMUSG00000027099	Mtx2	1500012G02Rik	metaxin 2	protein-coding
2503	chr4	129204498	129205242	+	7.57	8.51	3.73	4.78	3.51e-27	1.64e-25	0	NA	intron (NM_134151	intron 4 of 12)	intron (NM_134151	intron 4 of 12)	15075	NM_134151	107271	Mm.145488	NM_134151	ENSMUSG00000028811	Yars	AL024047|AU018965	tyrosyl-tRNA synthetase	protein-coding
4666	chr8	111435284	111435882	+	6.74	7.68	2.91	4.78	1.92e-21	4.84e-20	0	NA	Intergenic	Tigger7|DNA|TcMar-Tigger	-14617	NR_105819
10726	chr12	73269995	73270491	+	6	6.95	2.16	4.78	1.04e-14	1.13e-13	0	NA	intron (NM_008612	intron 7 of 7)	intron (NM_008612	intron 7 of 7)	16468	NM_029580	76357	Mm.311344	NM_029580	ENSMUSG00000034442	Trmt5	2610027O18Rik|mKIAA1393	TRM5 tRNA methyltransferase 5	protein-coding
14368	chrX	20418470	20418889	+	5.66	6.61	1.83	4.78	1.49e-12	1.22e-11	0	NA	Intergenic	MER68|LTR|ERVL	-7009	NM_001289684	382207	Mm.281517	NM_199317	ENSMUSG00000037315	Jade3	5730598B06|AI851988|AW544806|Phf16|mKIAA0215	jade family PHD finger 3	protein-coding
63	chr3	58469204	58470557	+	9.08	10.03	5.26	4.77	6.5e-73	1.18e-69	0	NA	Intergenic	Intergenic	55160	NM_001347233	72033	Mm.218409	NM_001081229	ENSMUSG00000027806	Tsc22d2	1810043J12Rik|5530402M19Rik	TSC22 domain family	member 2	protein-coding
1699	chr1	14484213	14484911	+	7.41	8.36	3.59	4.77	3.7e-31	2.55e-29	0	NA	Intergenic	Intergenic	-174363	NM_010164	14048	Mm.250185	NM_010164	ENSMUSG00000025932	Eya1	bor	EYA transcriptional coactivator and phosphatase 1	protein-coding
5361	chr10	95884055	95884508	+	6.58	7.53	2.76	4.77	3.08e-20	6.74e-19	0	NA	Intergenic	MT2A|LTR|ERVL	-56382	NM_001001932	216238	Mm.210035	NM_001001932	ENSMUSG00000036499	Eea1	A430109M19Rik|B230358H09Rik|ZFYVE2	early endosome antigen 1	protein-coding
6228	chr5	81365181	81365607	+	6.61	7.56	2.79	4.77	4.52e-19	8.5e-18	0	NA	intron (NM_198702	intron 5 of 27)	intron (NM_198702	intron 5 of 27)	343801	NM_198702	319387	Mm.273631	NM_198702	ENSMUSG00000037605	Adgrl3	5430402I23Rik|CIRL-3|D130075K09Rik|Gm1379|LEC3|Lphn3|mKIAA0768	adhesion G protein-coupled receptor L3	protein-coding
11956	chr10	99297688	99298142	+	6.08	7.03	2.25	4.77	6.61e-14	6.48e-13	0	NA	Intergenic	Tigger16b|DNA|TcMar-Tigger	34684	NM_026268	67603	Mm.1791	NM_026268	ENSMUSG00000019960	Dusp6	1300019I03Rik|MKP-3|MKP3|PYST1	dual specificity phosphatase 6	protein-coding
14651	chr5	143187905	143188526	+	6.11	7.06	2.29	4.77	2.01e-12	1.61e-11	0	NA	intron (NM_177880	intron 1 of 7)	MERVL-int|LTR|ERVL	7198	NM_177880	330228	Mm.255752	NM_177880	ENSMUSG00000029586	Spdye4b	4933411G11Rik	speedy/RINGO cell cycle regulator family	member E4B	protein-coding
17514	chr13	42307943	42311530	+	10.09	11.03	6.26	4.77	3.44e-11	2.3e-10	0	NA	Intergenic	Intergenic	8260	NM_010104	13614	Mm.14543	NM_010104	ENSMUSG00000021367	Edn1	ET-1|PPET1|preproET	endothelin 1	protein-coding
28404	chr11	109896195	109896501	+	4.81	5.76	0.99	4.77	3.41e-08	1.41e-07	0	NA	Intergenic	Intergenic	50470	NR_045909	73257	Mm.250442	NR_045909	ENSMUSG00000087393	1700023C21Rik	-	RIKEN cDNA 1700023C21 gene	ncRNA
45	chrX	155210591	155213093	+	9.26	10.21	5.45	4.76	2.03e-77	5.29e-74	0	NA	Intergenic	Intergenic	4607	NM_001291865	20229	Mm.2734	NM_009121	ENSMUSG00000025283	Sat1	AA617398|SSAT|Sat	spermidine/spermine N1-acetyl transferase 1	protein-coding
328	chr3	95725744	95727282	+	8.45	9.4	4.64	4.76	2.8e-50	1e-47	0	NA	Intergenic	B4A|SINE|B4	8460	NR_105981	102466787		NR_105981	ENSMUSG00000098737	Mir7014	Gm27837|mmu-mir-7014	microRNA 7014	ncRNA
411	chr1	194089737	194090823	+	8.14	9.09	4.33	4.76	2.58e-47	7.36e-45	0	NA	Intergenic	Intergenic	132479	NR_040477	74942	Mm.60689	NR_040477	ENSMUSG00000103692	4930503O07Rik	-	RIKEN cDNA 4930503O07 gene	ncRNA
483	chr15	51798621	51799348	+	8.09	9.04	4.28	4.76	1.27e-45	3.08e-43	0	NA	intron (NM_080635	intron 3 of 7)	intron (NM_080635	intron 3 of 7)	66477	NM_080635	68135	Mm.289800	NM_080635	ENSMUSG00000022312	Eif3h	1110008A16Rik|40kD|9430017H16Rik|EIF3-P40|EIF3-gamma|Eif3s3	eukaryotic translation initiation factor 3	subunit H	protein-coding
3486	chr9	40767943	40768454	+	7.04	7.99	3.22	4.76	4.48e-24	1.51e-22	0	NA	intron (NM_133733	intron 2 of 6)	intron (NM_133733	intron 2 of 6)	-33075	NM_031165	15481	Mm.290774	NM_031165	ENSMUSG00000015656	Hspa8	2410008N15Rik|Hsc70|Hsc71|Hsc73|Hsp73|Hspa10	heat shock protein 8	protein-coding
4169	chrX	95801699	95802278	+	6.82	7.77	3.01	4.76	2.11e-22	5.94e-21	0	NA	intron (NM_001034907	intron 3 of 8)	RMER1B|Other|Other	-68723	NM_029590	76386	Mm.443249	NM_029590		1700010D01Rik	-	RIKEN cDNA 1700010D01 gene	protein-coding
7521	chr2	52057091	52057469	+	6.29	7.24	2.48	4.76	1.65e-17	2.58e-16	0	NA	TTS (NM_009398)	TTS (NM_009398)	-15557	NM_001355415	51869	Mm.254530	NM_175238	ENSMUSG00000036202	Rif1	5730435J01Rik|6530403D07Rik|AU016181|AW549474|D2Ertd145e	replication timing regulatory factor 1	protein-coding
8445	chr14	73410123	73410447	+	6.28	7.23	2.47	4.76	1.56e-16	2.16e-15	0	NA	Intergenic	Intergenic	-24996	NM_008410	16432	Mm.4266	NM_008410	ENSMUSG00000022108	Itm2b	AI256040|Bri|Bri2|Bricd2b|D14Sel6|E25BMM|imBRI2	integral membrane protein 2B	protein-coding
26773	chr4	115922822	115923102	+	5.03	5.98	1.23	4.76	1.52e-08	6.65e-08	0	NA	intron (NM_130865	intron 2 of 4)	intron (NM_130865	intron 2 of 4)	16964	NM_130865	140477	Mm.213206	NM_130865	ENSMUSG00000028707	Dmbx1	Atx|Cdmx|Mbx|Otx3	diencephalon/mesencephalon homeobox 1	protein-coding
29517	chr18	53599129	53599472	+	4.8	5.75	0.99	4.76	5.66e-08	2.25e-07	0	NA	Intergenic	Intergenic	-48851	NR_040349	100502945	Mm.376937	NR_040349		Gm19466	-	predicted gene	19466	ncRNA
29690	chr17	48366866	48367132	+	4.78	5.72	0.97	4.76	6.23e-08	2.46e-07	0	NA	non-coding (NR_110338	exon 6 of 6)	non-coding (NR_110338	exon 6 of 6)	7083	NM_027763	71326	Mm.90177	NM_027763	ENSMUSG00000023993	Treml1	5430401J17Rik|TLT-1	triggering receptor expressed on myeloid cells-like 1	protein-coding
38380	chr6	71783253	71783456	+	4.46	5.41	0.65	4.76	1.72e-06	5.26e-06	0	NA	intron (NM_178608	intron 5 of 6)	intron (NM_178608	intron 5 of 6)	40430	NM_025430	66223	Mm.28579	NM_025430	ENSMUSG00000052962	Mrpl35	1110066C01Rik	mitochondrial ribosomal protein L35	protein-coding
1026	chr9	75196194	75196738	+	7.73	8.68	3.93	4.75	1.11e-36	1.27e-34	0	NA	intron (NM_010864	intron 32 of 40)	intron (NM_010864	intron 32 of 40)	-35548	NM_001081322	208943	Mm.41339	NM_001081322	ENSMUSG00000033590	Myo5c	9130003O20Rik|BB085560|C330029I24	myosin VC	protein-coding
1073	chr9	79215567	79216633	+	7.74	8.69	3.94	4.75	3.86e-36	4.22e-34	0	NA	Intergenic	Intergenic	303202	NR_045336	100038575	Mm.367838	NR_045336	ENSMUSG00000111765	Gm10635	-	predicted gene 10635	ncRNA
1357	chr14	122919888	122920506	+	7.69	8.63	3.88	4.75	1.56e-33	1.35e-31	0	NA	intron (NR_153663	intron 16 of 16)	intron (NR_153663	intron 16 of 16)	-7032	NM_145466	223267	Mm.379358	NM_145466	ENSMUSG00000041625	Ggact	A2ld1	gamma-glutamylamine cyclotransferase	protein-coding
1888	chr6	61233084	61234038	+	7.34	8.29	3.53	4.75	4.5e-30	2.79e-28	0	NA	intron (NM_183310	intron 1 of 10)	intron (NM_183310	intron 1 of 10)	-52751	NR_040287	100504262	Mm.438066	NR_040287		A730020E08Rik	-	RIKEN cDNA A730020E08 gene	ncRNA
2232	chr13	78679332	78679919	+	7.29	8.24	3.49	4.75	2.73e-28	1.43e-26	0	NA	Intergenic	Intergenic	-480752	NM_010151	13865	Mm.439653	NM_010151	ENSMUSG00000069171	Nr2f1	COUP-TF1|COUP-TFI|COUPTFA|EAR-3|EAR3|Erbal3|SVP44|Tcfcoup1	nuclear receptor subfamily 2	group F	member 1	protein-coding
3861	chr13	15561485	15562047	+	7.03	7.98	3.23	4.75	3.82e-23	1.16e-21	0	NA	intron (NM_008130	intron 3 of 14)	MTC|LTR|ERVL-MaLR	98043	NM_008130	14634	Mm.5098	NM_008130	ENSMUSG00000021318	Gli3	AI854843|AU023367|Bph|GLI3-190|GLI3FL|Pdn|Xt|add	GLI-Kruppel family member GLI3	protein-coding
6009	chr13	30990210	30990619	+	6.58	7.53	2.78	4.75	2.34e-19	4.57e-18	0	NA	Intergenic	Intergenic	-16367	NM_025588	66482	Mm.293510	NM_025588	ENSMUSG00000021357	Exoc2	2410030I24Rik|AI648199|Sec5|Sec5l1	exocyst complex component 2	protein-coding
14039	chr17	79164078	79164408	+	5.66	6.6	1.85	4.75	1.05e-12	8.76e-12	0	NA	Intergenic	Intergenic	112337	NM_001316729	70536	Mm.293870	NM_027455	ENSMUSG00000024084	Qpct	5730422A13Rik	glutaminyl-peptide cyclotransferase (glutaminyl cyclase)	protein-coding
17551	chr17	74630865	74631113	+	5.52	6.47	1.72	4.75	3.54e-11	2.37e-10	0	NA	exon (NM_007566	exon 40 of 73)	exon (NM_007566	exon 40 of 73)	-86761	NM_152817	74196	Mm.209503	NM_152817	ENSMUSG00000024078	Ttc27	2610511O17Rik	tetratricopeptide repeat domain 27	protein-coding
29619	chr12	72748880	72749171	+	4.79	5.74	0.99	4.75	5.98e-08	2.37e-07	0	NA	Intergenic	Intergenic	-12186	NM_008910	19042	Mm.261045	NM_008910	ENSMUSG00000021096	Ppm1a	2310003C21Rik|2900017D14Rik|AI427932|AU017636|MMPa-2|MPPa-1	protein phosphatase 1A	magnesium dependent	alpha isoform	protein-coding
35431	chr16	45945772	45946002	+	4.48	5.42	0.68	4.75	6.36e-07	2.1e-06	0	NA	intron (NR_152226	intron 1 of 2)	B3A|SINE|B2	281	NR_152226	100503378	Mm.387133	NR_152226	ENSMUSG00000085826	Gm15638	Gm41457	predicted gene 15638	ncRNA
5	chr9	96781364	96784588	+	10.06	11.01	6.26	4.74	4.91e-108	1.15e-103	0	NA	Intergenic	Intergenic	17414	NR_102295	319707	Mm.392191	NR_102293	ENSMUSG00000101581	C430002N11Rik	-	RIKEN cDNA C430002N11 gene	ncRNA
482	chr5	90611345	90612708	+	8.34	9.28	4.54	4.74	1.21e-45	2.94e-43	0	NA	intron (NM_001310656	intron 4 of 10)	intron (NM_001310656	intron 4 of 10)	28501	NM_028478	73246	Mm.30172	NM_028478	ENSMUSG00000029370	Rassf6	1600016B17Rik	Ras association (RalGDS/AF-6) domain family member 6	protein-coding
596	chr15	85423821	85424698	+	7.96	8.91	4.16	4.74	5.81e-43	1.14e-40	0	NA	intron (NM_016843	intron 9 of 11)	intron (NM_016843	intron 9 of 11)	78968	NM_001256072	328577	Mm.212960	NM_001256072	ENSMUSG00000096607	7530416G11Rik	-	RIKEN cDNA 7530416G11 gene	protein-coding
1341	chr12	98255412	98256007	+	7.7	8.64	3.91	4.74	1.11e-33	9.73e-32	0	NA	intron (NM_008079	intron 3 of 16)	intron (NM_008079	intron 3 of 16)	3750	NM_008079	14420	Mm.5120	NM_008079	ENSMUSG00000021003	Galc	2310068B06Rik|A930008M05Rik|AW212969|AW413532|Gacy|twi|twitcher	galactosylceramidase	protein-coding
1500	chr6	39447691	39448385	+	7.61	8.56	3.83	4.74	2.02e-32	1.58e-30	0	NA	Intergenic	RMER15|LTR|ERVL	27660	NR_152168	621427	Mm.389742	NR_152168	ENSMUSG00000068601	Gm10244	Anmkrn1	predicted gene 10244	ncRNA
1613	chr9	103061543	103062184	+	7.52	8.46	3.72	4.74	1.18e-31	8.54e-30	0	NA	intron (NM_033314	intron 3 of 13)	intron (NM_033314	intron 3 of 13)	-50211	NM_173781	270192	Mm.490252	NM_173781	ENSMUSG00000032549	Rab6b	9630015C03|AI844641|C330006L04Rik|D9Bwg0185e	RAB6B	member RAS oncogene family	protein-coding
2365	chr8	34525012	34525975	+	7.44	8.39	3.65	4.74	9.34e-28	4.63e-26	0	NA	Intergenic	Intergenic	114823	NR_040706	330734	Mm.149998	NR_040706	ENSMUSG00000109819	B930018H19Rik	B930018H19	RIKEN cDNA B930018H19 gene	ncRNA
2493	chrX	12959510	12960454	+	7.31	8.26	3.51	4.74	3.26e-27	1.54e-25	0	NA	Intergenic	Intergenic	-17891	NR_153101	75037	Mm.387976	NR_153101		4930500G05Rik	-	RIKEN cDNA 4930500G05 gene	ncRNA
5288	chr7	101964456	101964940	+	6.74	7.68	2.95	4.74	2.34e-20	5.19e-19	0	NA	Intergenic	Intergenic	-5145	NM_133947	101706	Mm.27259	NM_133947	ENSMUSG00000066306	Numa1	6720401E04Rik|AA764025|AL022610|AU014979|NuMA	nuclear mitotic apparatus protein 1	protein-coding
5879	chr7	133132531	133133050	+	6.54	7.49	2.75	4.74	1.63e-19	3.24e-18	0	NA	intron (NR_046279	intron 2 of 2)	intron (NR_046279	intron 2 of 2)	4539	NR_046279	74970	Mm.491044	NR_046279	ENSMUSG00000109816	4930483O08Rik	-	RIKEN cDNA 4930483O08 gene	ncRNA
14425	chr6	81633652	81634039	+	5.66	6.61	1.87	4.74	1.58e-12	1.29e-11	0	NA	Intergenic	L2a|LINE|L2	261818	NR_106091	102465711		NR_106091	ENSMUSG00000106154	Mir7232	mmu-mir-7232	microRNA 7232	ncRNA
24156	chr12	52228848	52229263	+	5.05	6	1.26	4.74	3.74e-09	1.81e-08	0	NA	intron (NM_029760	intron 6 of 10)	intron (NM_029760	intron 6 of 10)	131309	NM_029760	76826	Mm.244781	NM_029760	ENSMUSG00000035142	Nubpl	2410170E07Rik	nucleotide binding protein-like	protein-coding
30616	chr18	24320082	24320377	+	4.76	5.7	0.97	4.74	9.45e-08	3.62e-07	0	NA	Intergenic	Intergenic	-19137	NR_152129	328919	Mm.118671	NR_152129		Gm38410	9530053H22	predicted gene	38410	ncRNA
486	chr12	69997922	69999156	+	8.27	9.22	4.48	4.73	1.54e-45	3.71e-43	0	NA	Intergenic	AT_rich|Low_complexity|Low_complexity	-11537	NM_022028	64010	Mm.390480	NM_022028	ENSMUSG00000021067	Sav1	1700040G09Rik|Salv|Sav|WW45|Wwp3|Wwp4	salvador family WW domain containing 1	protein-coding
601	chr3	93536971	93537746	+	8.42	9.37	4.64	4.73	6.59e-43	1.29e-40	0	NA	Intergenic	Intergenic	16862	NM_016740	20195	Mm.280038	NM_016740	ENSMUSG00000027907	S100a11	EMAPI|Emap1|S100a14|S100c|cal	S100 calcium binding protein A11	protein-coding
750	chr4	88928223	88929204	+	8.1	9.05	4.32	4.73	3.47e-40	5.43e-38	0	NA	intron (NR_132735	intron 1 of 2)	intron (NR_132735	intron 1 of 2)	13329	NR_132735	106557447	Mm.484668	NR_132734		LOC106557447	-	uncharacterized LOC106557447	ncRNA
1329	chr6	117613790	117614700	+	7.62	8.56	3.83	4.73	8.74e-34	7.71e-32	0	NA	Intergenic	Intergenic	119010	NR_152214	100126203	Mm.217172	NR_152214		6820426E19Rik	Gm43983	RIKEN cDNA 6820426E19 gene	ncRNA
3230	chr1	71947238	71947840	+	7.04	7.99	3.26	4.73	8.26e-25	3e-23	0	NA	Intergenic	ORR1F|LTR|ERVL-MaLR	57656	NR_040454	71134	Mm.370574	NR_040454	ENSMUSG00000101848	4933417E11Rik	-	RIKEN cDNA 4933417E11 gene	ncRNA
6106	chr7	90307912	90308486	+	6.55	7.5	2.77	4.73	3.05e-19	5.86e-18	0	NA	intron (NM_001040085	intron 1 of 18)	intron (NM_001040085	intron 1 of 18)	5844	NR_110348	83671	Mm.26751	NM_031394	ENSMUSG00000030616	Sytl2	AI266830|Slp2|mKIAA1597	synaptotagmin-like 2	protein-coding
9970	chr12	34039859	34040525	+	6.04	6.99	2.25	4.73	3.11e-15	3.66e-14	0	NA	Intergenic	Intergenic	82521	NM_011658	22160	Mm.3280	NM_011658	ENSMUSG00000035799	Twist1	M-Twist|Pde|Ska10|Ska<m10Jus>|Twist|bHLHa38|pdt	twist basic helix-loop-helix transcription factor 1	protein-coding
26792	chr4	136517844	136518596	+	7.66	8.61	3.88	4.73	1.53e-08	6.7e-08	0	NA	intron (NM_024452	intron 1 of 4)	L2|LINE|L2	48459	NM_024452	269593	Mm.485824	NM_024452	ENSMUSG00000001089	Luzp1	2700072H04Rik|AI266952|Luzp|mFLJ00226	leucine zipper protein 1	protein-coding
841	chr6	97124366	97125251	+	7.92	8.86	4.14	4.72	3.81e-39	5.31e-37	0	NA	intron (NM_175313	intron 10 of 17)	intron (NM_175313	intron 10 of 17)	24075	NM_175313	101351	Mm.116802	NM_175313	ENSMUSG00000035245	Eogt	A130022J15Rik|AI447490|AW214473|AW259391|Aer61	EGF domain-specific O-linked N-acetylglucosamine (GlcNAc) transferase	protein-coding
2186	chr9	73905726	73906434	+	7.38	8.32	3.6	4.72	1.58e-28	8.45e-27	0	NA	intron (NM_001081153	intron 1 of 30)	MER5A1|DNA|hAT-Charlie	27487	NM_001081153	208898	Mm.41035	NM_001081153	ENSMUSG00000062151	Unc13c	1500037O19Rik|AU019458|D9Ertd414e|Munc13-3|Unc13h3	unc-13 homolog C (C. elegans)	protein-coding
2550	chr8	24990166	24990896	+	7.19	8.13	3.42	4.72	5.46e-27	2.51e-25	0	NA	intron (NM_001270996	intron 10 of 21)	intron (NM_001270996	intron 10 of 21)	26391	NM_007404	11502	Mm.28908	NM_007404	ENSMUSG00000031555	Adam9	AU020942|MDC9|Mltng|mKIAA0021	a disintegrin and metallopeptidase domain 9 (meltrin gamma)	protein-coding
3019	chr7	70036789	70037445	+	7.03	7.98	3.26	4.72	1.93e-25	7.48e-24	0	NA	Intergenic	Intergenic	300705	NR_131145	624549	Mm.116344	NR_131144	ENSMUSG00000109097	Gm29683	Gm44536	predicted gene	29683	ncRNA
3062	chr5	98943741	98944211	+	7.13	8.07	3.36	4.72	3.1e-25	1.19e-23	0	NA	intron (NM_008926	intron 15 of 18)	intron (NM_008926	intron 15 of 18)	89561	NM_001310677	110075	Mm.136461	NM_173404	ENSMUSG00000029335	Bmp3	9530029I04Rik	bone morphogenetic protein 3	protein-coding
3529	chr19	37895987	37896722	+	6.92	7.86	3.14	4.72	5.77e-24	1.92e-22	0	NA	Intergenic	Intergenic	147223	NM_001099634	226101	Mm.34674	NM_177035	ENSMUSG00000048612	Myof	2310004N10Rik|2310051D19Rik|E030042N20Rik|Fer1l3	myoferlin	protein-coding
5571	chr19	38022564	38023091	+	6.61	7.55	2.83	4.72	5.83e-20	1.23e-18	0	NA	intron (NM_001302140	intron 2 of 53)	intron (NM_001302140	intron 2 of 53)	20750	NM_001099634	226101	Mm.34674	NM_177035	ENSMUSG00000048612	Myof	2310004N10Rik|2310051D19Rik|E030042N20Rik|Fer1l3	myoferlin	protein-coding
6970	chr5	131486564	131486983	+	6.44	7.39	2.66	4.72	3.95e-18	6.65e-17	0	NA	intron (NM_177047	intron 6 of 19)	B3A|SINE|B2	-72055	NR_152164	545809	Mm.357553	NR_152164	ENSMUSG00000105387	Gm29681	Gm42590	predicted gene	29681	ncRNA
7091	chr19	26863605	26864188	+	6.58	7.53	2.81	4.72	5.59e-18	9.25e-17	0	NA	Intergenic	Intergenic	-22029	NM_001033407	329047	Mm.293289	NM_001033407	ENSMUSG00000074913	Gm815	-	predicted gene 815	protein-coding
10059	chr2	33591163	33591600	+	6.05	7	2.28	4.72	3.56e-15	4.15e-14	0	NA	intron (NM_010725	intron 2 of 7)	intron (NM_010725	intron 2 of 7)	49130	NM_010725	16917	Mm.39825	NM_010725	ENSMUSG00000038765	Lmx1b	Icst|LMX1.1|LMX1.2	LIM homeobox transcription factor 1 beta	protein-coding
17545	chr5	139112421	139112685	+	5.44	6.38	1.66	4.72	3.53e-11	2.36e-10	0	NA	intron (NM_001359101	intron 1 of 9)	intron (NM_001359101	intron 1 of 9)	17199	NM_008923	19085	Mm.306163	NM_008923	ENSMUSG00000025855	Prkar1b	AI385716|RIbeta	protein kinase	cAMP dependent regulatory	type I beta	protein-coding
37129	chr2	11378724	11378931	+	4.42	5.37	0.65	4.72	1.14e-06	3.59e-06	0	NA	intron (NR_040615	intron 1 of 2)	intron (NR_040615	intron 1 of 2)	19673	NR_040615	77543	Mm.490670	NR_040615	ENSMUSG00000102674	8030442B05Rik	-	RIKEN cDNA 8030442B05 gene	ncRNA
55094	chr5	146861546	146862156	+	6.58	7.52	2.8	4.72	0.000118	0.000251	0.000251	NA	Intergenic	Intergenic	16780	NM_026864	68895	Mm.266978	NM_026864	ENSMUSG00000029641	Rasl11a	1110065D03Rik|AI852031	RAS-like	family 11	member A	protein-coding
210	chr11	72751717	72752772	+	8.41	9.35	4.65	4.71	4.63e-56	2.59e-53	0	NA	intron (NM_009671	intron 15 of 24)	intron (NM_009671	intron 15 of 24)	43595	NM_001024926	192986	Mm.194755	NM_001024926	ENSMUSG00000057778	Cyb5d2	9330151E16Rik|Gm2	cytochrome b5 domain containing 2	protein-coding
1776	chr12	3389297	3389979	+	7.5	8.45	3.74	4.71	1.25e-30	8.26e-29	0	NA	exon (NM_008445	exon 4 of 8)	exon (NM_008445	exon 4 of 8)	24506	NM_008445	16570	Mm.7688	NM_008445	ENSMUSG00000020668	Kif3c	mKIAA4058	kinesin family member 3C	protein-coding
3054	chr5	75990171	75990732	+	7.08	8.03	3.32	4.71	2.75e-25	1.06e-23	0	NA	Intergenic	MLT1F|LTR|ERVL-MaLR	-12023	NM_010612	16542	Mm.285	NM_010612	ENSMUSG00000062960	Kdr	6130401C07|Flk-1|Flk1|Krd-1|Ly73|VEGFR-2|VEGFR2|orv|sVEGFR-2	kinase insert domain protein receptor	protein-coding
7285	chr7	112155235	112155705	+	6.43	7.38	2.66	4.71	9.51e-18	1.53e-16	0	NA	intron (NM_001360257	intron 2 of 7)	intron (NM_001360257	intron 2 of 7)	3226	NM_001360260	50781	Mm.55143	NM_015814	ENSMUSG00000030772	Dkk3	AW061014|C87148|dkk-3|mDkk-3	dickkopf WNT signaling pathway inhibitor 3	protein-coding
20389	chr14	60526877	60527135	+	5.27	6.22	1.51	4.71	3.32e-10	1.91e-09	0	NA	Intergenic	Intergenic	-107699	NM_001033272	219140	Mm.149776	NM_001033272	ENSMUSG00000021990	Spata13	C79050|ESTM11|X83327|mFLJ00298	spermatogenesis associated 13	protein-coding
30765	chr3	18127108	18127376	+	4.73	5.67	0.97	4.71	1.01e-07	3.84e-07	0	NA	intron (NM_007825	intron 1 of 5)	intron (NM_007825	intron 1 of 5)	72917	NM_021560	59058	Mm.149938	NM_021560	ENSMUSG00000025128	Bhlhe22	Beta3|Beta3a|Bhlhb5	basic helix-loop-helix family	member e22	protein-coding
36096	chr15	8228129	8228336	+	4.47	5.42	0.71	4.71	8.06e-07	2.62e-06	0	NA	intron (NM_001162906	intron 33 of 52)	MTE2a|LTR|ERVL-MaLR	59126	NM_001162906	73692	Mm.164436	NM_001162906	ENSMUSG00000039801	2410089E03Rik	4732468D17Rik|Hug|Jbts17|b2b012Clo	RIKEN cDNA 2410089E03 gene	protein-coding
46117	chr16	91753732	91753910	+	4.05	4.99	0.28	4.71	1.55e-05	3.94e-05	0	NA	intron (NM_001110276	intron 1 of 15)	PB1D9|SINE|Alu	24450	NM_001110276	16443	Mm.40546	NM_010587	ENSMUSG00000022957	Itsn1	AA517634|AA545208|AI316805|AI839402|AI848451|Ehsh1|Ese1|Itsn|Sh3p17	intersectin 1 (SH3 domain protein 1A)	protein-coding
18	chr10	120716488	120718136	+	9.47	10.42	5.72	4.7	1.3e-92	8.49e-89	0	NA	Intergenic	Intergenic	-48420	NR_038003	70874	Mm.427286	NR_038000	ENSMUSG00000044544	4921513I03Rik	-	RIKEN cDNA 4921513I03 gene	ncRNA
791	chr3	88983828	88984554	+	7.91	8.86	4.16	4.7	9.21e-40	1.37e-37	0	NA	exon (NM_138679	exon 2 of 27)	exon (NM_138679	exon 2 of 27)	18379	NM_138679	192195	Mm.130752	NM_138679	ENSMUSG00000028053	Ash1l	8030453L17Rik|Ash1|E430018P19Rik|Kmt2h	ASH1 like histone lysine methyltransferase	protein-coding
1199	chr5	100622227	100623217	+	7.65	8.6	3.9	4.7	7.4e-35	7.23e-33	0	NA	Intergenic	Intergenic	-50517	NM_139198	231507	Mm.34609	NM_139198	ENSMUSG00000029322	Plac8	C15|D5Wsu111e	placenta-specific 8	protein-coding
1363	chr4	83941115	83942127	+	7.59	8.53	3.84	4.7	1.73e-33	1.48e-31	0	NA	Intergenic	Intergenic	103258	NR_130998	78238	Mm.243903	NR_130998	ENSMUSG00000085217	6030471H07Rik	-	RIKEN cDNA 6030471H07 gene	ncRNA
1371	chr3	65643101	65644294	+	7.84	8.79	4.09	4.7	2.11e-33	1.8e-31	0	NA	Intergenic	ORR1D2|LTR|ERVL-MaLR	-15591	NR_106200	102465905		NR_106200	ENSMUSG00000098944	Mir8120	Gm27637|mmu-mir-8120	microRNA 8120	ncRNA
2603	chr17	75112888	75113351	+	7.45	8.39	3.7	4.7	8.74e-27	3.94e-25	0	NA	intron (NM_019919	intron 3 of 33)	intron (NM_019919	intron 3 of 33)	-65662	NM_001331235	268977	Mm.269747	NM_019919	ENSMUSG00000001870	Ltbp1	9430031G15Rik|9830146M04|Ltbp-1|Ltbp1L|TGF-beta1-BP-1|Tgfb|b2b1000Clo	latent transforming growth factor beta binding protein 1	protein-coding
3215	chr15	43179351	43180021	+	7.02	7.96	3.26	4.7	7.64e-25	2.79e-23	0	NA	Intergenic	RMER6C|LTR|ERVK	-8868	NM_001357957	239405	Mm.193274	NM_172815	ENSMUSG00000051920	Rspo2	2610028F08Rik|AA673245|D430027K22|ftls	R-spondin 2	protein-coding
3687	chr17	72959393	72960165	+	6.91	7.85	3.15	4.7	1.5e-23	4.78e-22	0	NA	Intergenic	URR1A|DNA|hAT-Charlie	41474	NM_029999	77889	Mm.154109	NM_029999	ENSMUSG00000024063	Lbh	1810009F10Rik|6720416L16Rik	limb-bud and heart	protein-coding
6329	chr15	62629004	62629538	+	6.59	7.53	2.83	4.7	6.23e-19	1.15e-17	0	NA	Intergenic	Intergenic	-409820	NR_003523	67552	Mm.484027	NM_026230		H2afy3	4933432H23Rik	H2A histone family	member Y3	pseudo
7075	chr13	67811633	67812113	+	6.51	7.45	2.75	4.7	5.34e-18	8.85e-17	0	NA	intron (NR_045194	intron 2 of 2)	RLTR26_Mus|LTR|ERVK	-1943	NM_198322	212569	Mm.358842	NM_198322	ENSMUSG00000030446	Zfp273	6820416H06Rik|Rslcan1	zinc finger protein 273	protein-coding
7543	chr7	132841291	132841677	+	6.41	7.35	2.66	4.7	1.74e-17	2.7e-16	0	NA	intron (NM_028095	intron 3 of 5)	intron (NM_028095	intron 3 of 5)	11163	NM_028095	72096	Mm.28631	NM_028095	ENSMUSG00000030960	Eef1akmt2	2010208K18Rik|Mettl10	EEF1A lysine methyltransferase 2	protein-coding
12254	chr11	57914163	57914649	+	6.1	7.05	2.35	4.7	1.06e-13	1.01e-12	0	NA	Intergenic	B4A|SINE|B4	-82259	NM_008213	15110	Mm.4746	NM_008213	ENSMUSG00000037335	Hand1	Ehand1|Hxt|Th1|Thing1|bHLHa27|eHAND	heart and neural crest derivatives expressed 1	protein-coding
12923	chr10	21773528	21774030	+	6.17	7.11	2.41	4.7	2.65e-13	2.41e-12	0	NA	Intergenic	Intergenic	82934	NR_045843	432436	Mm.244553	NM_001004162	ENSMUSG00000056716	Gm5420	EG432436	predicted gene 5420	ncRNA
13853	chr3	137552492	137552815	+	5.75	6.7	2	4.7	8.33e-13	7.05e-12	0	NA	promoter-TSS (NM_177665)	promoter-TSS (NM_177665)	-31	NM_177665	229862	Mm.246591	NM_177665	ENSMUSG00000055138	Gm4861	9230109N16|EG229862	predicted gene 4861	protein-coding
14740	chr6	29248337	29248827	+	5.72	6.66	1.97	4.7	2.23e-12	1.77e-11	0	NA	Intergenic	Intergenic	-23906	NM_001190461	69573	Mm.45161	NM_023516	ENSMUSG00000043421	Hilpda	2310016C08Rik|AW049004|Hig2	hypoxia inducible lipid droplet associated	protein-coding
39875	chr9	22236005	22236256	+	4.46	5.41	0.71	4.7	2.74e-06	8.05e-06	0	NA	non-coding (NR_028420	exon 3 of 5)	non-coding (NR_028420	exon 3 of 5)	10418	NM_001164624	235047	Mm.290849	NM_172763	ENSMUSG00000057982	Zfp809	BB114266|C330026E23	zinc finger protein 809	protein-coding
54581	chr8	116071509	116071920	+	5.97	6.91	2.22	4.7	0.000106	0.000227	0.000227	NA	Intergenic	Intergenic	-364820	NM_001025577	17132	Mm.275549	NM_001025577	ENSMUSG00000055435	Maf	2810401A20Rik|A230108G15Rik|AW047063|c-maf	avian musculoaponeurotic fibrosarcoma oncogene homolog	protein-coding
52	chr7	126627779	126628801	+	8.89	9.84	5.15	4.69	3.22e-76	7.25e-73	0	NA	Intergenic	Intergenic	-2820	NM_019738	56312	Mm.18742	NM_019738	ENSMUSG00000030717	Nupr1	2310032H04Rik|Com1|p8	nuclear protein transcription regulator 1	protein-coding
366	chr7	130332495	130333135	+	8.18	9.12	4.43	4.69	8.43e-49	2.7e-46	0	NA	Intergenic	Intergenic	-66007	NM_010207	14183	Mm.16340	NM_010207	ENSMUSG00000030849	Fgfr2	AU043015|AW556123|Bek|Fgfr-2|Fgfr-7|Fgfr7|KGFR|KGFRTr|svs	fibroblast growth factor receptor 2	protein-coding
1177	chr7	82811073	82811965	+	7.84	8.79	4.1	4.69	5e-35	4.98e-33	0	NA	Intergenic	Intergenic	-55814	NM_175366	108797	Mm.306789	NM_175366	ENSMUSG00000057706	Mex3b	4931439A04Rik|M-04814|Rkhd3|mKIAA2009	mex3 RNA binding family member B	protein-coding
1880	chr10	59508921	59509869	+	7.54	8.48	3.79	4.69	4.19e-30	2.61e-28	0	NA	intron (NM_001033259	intron 1 of 7)	L1M5|LINE|L1	-67616	NM_010959	18302	Mm.123013	NM_010959	ENSMUSG00000009654	Oit3	EF-9|LZP	oncoprotein induced transcript 3	protein-coding
6755	chr12	11317636	11318061	+	6.53	7.48	2.79	4.69	2.05e-18	3.55e-17	0	NA	exon (NM_025695	exon 27 of 27)	exon (NM_025695	exon 27 of 27)	17961	NR_106136	102465775		NR_106136	ENSMUSG00000098879	Mir7675	Gm27965|mmu-mir-7675	microRNA 7675	ncRNA
26143	chr8	36004432	36004760	+	4.97	5.92	1.23	4.69	1.08e-08	4.85e-08	0	NA	Intergenic	Intergenic	-90232	NM_172911	244418	Mm.244971	NM_172911	ENSMUSG00000050271	Prag1	9830148H23|D8Ertd82e|NACK|Sgk223|mFLJ00269	PEAK1 related kinase activating pseudokinase 1	protein-coding
45424	chr2	137715748	137716426	+	8.22	9.16	4.47	4.69	1.31e-05	3.37e-05	0	NA	Intergenic	Intergenic	-540497	NM_001025431	228662	Mm.153405	NM_145534	ENSMUSG00000062098	Btbd3	mKIAA0952	BTB (POZ) domain containing 3	protein-coding
1948	chr15	52928194	52928820	+	7.49	8.43	3.75	4.68	1.09e-29	6.56e-28	0	NA	Intergenic	Intergenic	216062	NM_027212	69790	Mm.195562	NM_027212	ENSMUSG00000038622	Med30	1810038N03Rik|2510044J04Rik|TRAP25|Thrap6	mediator complex subunit 30	protein-coding
5090	chr11	91065310	91065844	+	6.84	7.78	3.11	4.68	1.08e-20	2.49e-19	0	NA	Intergenic	Intergenic	260886	NR_045956	73922	Mm.233289	NR_045956	ENSMUSG00000085940	4930405D11Rik	-	RIKEN cDNA 4930405D11 gene	ncRNA
5947	chr12	16788469	16788951	+	6.5	7.45	2.77	4.68	1.95e-19	3.84e-18	0	NA	intron (NM_015764	intron 1 of 34)	intron (NM_015764	intron 1 of 34)	12176	NM_015764	268527	Mm.428062	NM_015764	ENSMUSG00000036523	Greb1	5730583K22Rik|9130004E13|AF180470|AU023194|mKIAA0575	gene regulated by estrogen in breast cancer protein	protein-coding
7226	chr5	5167208	5167644	+	6.51	7.45	2.77	4.68	8.05e-18	1.31e-16	0	NA	intron (NM_011074	intron 5 of 14)	MTE2a|LTR|ERVL-MaLR	98642	NM_001310448	18647	Mm.389061	NM_011074	ENSMUSG00000028926	Cdk14	Pftk1|mKIAA0834	cyclin-dependent kinase 14	protein-coding
10967	chr13	32846267	32846547	+	5.99	6.94	2.25	4.68	1.52e-14	1.62e-13	0	NA	intron (NM_025429	intron 4 of 6)	intron (NM_025429	intron 4 of 6)	4778	NM_025429	66222	Mm.20144	NM_025429	ENSMUSG00000044734	Serpinb1a	1190005M04Rik|AI325983|EI|EIA|ELANH2|LEI|M/NEI|MNEI|PI2	serine (or cysteine) peptidase inhibitor	clade B	member 1a	protein-coding
15502	chr11	43895408	43895721	+	5.58	6.53	1.84	4.68	5.13e-12	3.88e-11	0	NA	intron (NM_001284381	intron 1 of 4)	intron (NM_001284381	intron 1 of 4)	5673	NM_001284381	11548	Mm.39086	NM_007416	ENSMUSG00000050541	Adra1b	[a]1b	adrenergic receptor	alpha 1b	protein-coding
16173	chr1	165755235	165755726	+	5.69	6.63	1.95	4.68	9.94e-12	7.21e-11	0	NA	Intergenic	Intergenic	-8278	NM_011804	433375	Mm.294885	NM_011804	ENSMUSG00000040713	Creg1	AA755314|Creg	cellular repressor of E1A-stimulated genes 1	protein-coding
25913	chr11	70141965	70142388	+	5.02	5.96	1.28	4.68	9.68e-09	4.38e-08	0	NA	Intergenic	RLTR48A|LTR|ERV1	11819	NM_145137	216864	Mm.222465	NM_145137	ENSMUSG00000040950	Mgl2	CD301b	macrophage galactose N-acetyl-galactosamine specific lectin 2	protein-coding
38235	chrX	72203257	72203473	+	4.45	5.39	0.71	4.68	1.65e-06	5.05e-06	0	NA	Intergenic	Intergenic	-18652	NM_020280	17140	Mm.377097	NM_020280	ENSMUSG00000033343	Magea4	Mage-a4	melanoma antigen	family A	4	protein-coding
38799	chr8	84336223	84336899	+	7.84	8.78	4.1	4.68	1.96e-06	5.93e-06	0	NA	Intergenic	Intergenic	-66159	NM_026350	67736	Mm.30095	NM_026350	ENSMUSG00000004994	Ccdc130	4930527D15Rik|C77430	coiled-coil domain containing 130	protein-coding
729	chr1	40847572	40848198	+	8.03	8.98	4.3	4.67	1.74e-40	2.81e-38	0	NA	intron (NM_001081198	intron 4 of 4)	intron (NM_001081198	intron 4 of 4)	42284	NM_001081198	381339	Mm.334678	NM_001081198	ENSMUSG00000079588	Tmem182	2310079P10Rik|AI414494	transmembrane protein 182	protein-coding
4747	chr17	74570507	74571016	+	7.14	8.08	3.41	4.67	2.62e-21	6.46e-20	0	NA	intron (NM_007566	intron 7 of 72)	intron (NM_007566	intron 7 of 72)	42466	NM_007566	12211	Mm.442564	NM_007566	ENSMUSG00000024073	Birc6	A430032G04Rik|A430040A19Rik|AA501170|Bruce|D630005A10Rik|mKIAA1289	baculoviral IAP repeat-containing 6	protein-coding
13933	chr13	56444147	56444527	+	5.83	6.77	2.1	4.67	9.12e-13	7.67e-12	0	NA	intron (NM_177809	intron 2 of 7)	intron (NM_177809	intron 2 of 7)	5982	NM_177809	328258	Mm.482177	NM_177809	ENSMUSG00000021509	Slc25a48	AU042651|E230025K15	solute carrier family 25	member 48	protein-coding
23139	chr3	100097015	100097255	+	5.17	6.11	1.45	4.67	2.04e-09	1.03e-08	0	NA	intron (NM_028892	intron 40 of 48)	intron (NM_028892	intron 40 of 48)	65272	NM_175552	269470	Mm.24591	NM_175552	ENSMUSG00000033285	Wdr3	AW546279|D030020G18Rik	WD repeat domain 3	protein-coding
35407	chr5	144150933	144151686	+	7.32	8.27	3.59	4.67	6.27e-07	2.08e-06	0	NA	intron (NM_001081109	intron 6 of 13)	intron (NM_001081109	intron 6 of 13)	-38977	NM_010800	17341	Mm.386767	NM_010800	ENSMUSG00000052271	Bhlha15	1810009C13Rik|Bhlhb8|MIST-1|Mist1	basic helix-loop-helix family	member a15	protein-coding
69115	chrX	95765535	95765987	+	5.77	6.72	2.04	4.67	0.00156	0.00264	0.00264	NA	intron (NM_001034907	intron 2 of 8)	MERVL-int|LTR|ERVL	-32496	NM_029590	76386	Mm.443249	NM_029590		1700010D01Rik	-	RIKEN cDNA 1700010D01 gene	protein-coding
54	chr9	63677424	63678722	+	8.99	9.93	5.27	4.66	1.94e-75	4.21e-72	0	NA	intron (NM_016769	intron 1 of 8)	intron (NM_016769	intron 1 of 8)	75427	NM_025857	66939	Mm.34338	NM_025857	ENSMUSG00000037257	Aagab	2310007F21Rik|p34	alpha- and gamma-adaptin binding protein	protein-coding
65	chr7	139970861	139972135	+	8.84	9.78	5.12	4.66	6.55e-73	1.18e-69	0	NA	TTS (NM_001347613)	TTS (NM_001347613)	7257	NM_001347614	381933	Mm.440431	NM_001033465	ENSMUSG00000073795	6430531B16Rik	Gm1093	RIKEN cDNA 6430531B16 gene	protein-coding
859	chr17	36237134	36238040	+	8.07	9.02	4.35	4.66	6.36e-39	8.68e-37	0	NA	Intergenic	Intergenic	20259	NM_026308	67676	Mm.27131	NM_026308	ENSMUSG00000024446	Rpp21	0610037N01Rik	ribonuclease P 21 subunit	protein-coding
1616	chr10	94390769	94391616	+	7.53	8.47	3.81	4.66	1.19e-31	8.63e-30	0	NA	intron (NM_001359762	intron 1 of 4)	intron (NM_001359762	intron 1 of 4)	79243	NM_001359762	319880	Mm.23047	NM_172051	ENSMUSG00000020023	Tmcc3	A230066D03Rik|AW488095|C630016B22Rik|C88213|Gm1556|Tmcc1	transmembrane and coiled coil domains 3	protein-coding
3384	chr4	28424195	28424801	+	7.37	8.31	3.66	4.66	2.17e-24	7.51e-23	0	NA	Intergenic	Intergenic	-388633	NM_001290434	13841	Mm.257266	NM_010141	ENSMUSG00000028289	Epha7	Cek11|Ebk|Ehk3|Hek11|Mdk1	Eph receptor A7	protein-coding
6543	chr11	102536222	102536657	+	6.5	7.44	2.78	4.66	1.14e-18	2.05e-17	0	NA	intron (NM_001159492	intron 2 of 7)	intron (NM_001159492	intron 2 of 7)	19719	NM_001159492	237943	Mm.260282	NM_001159492	ENSMUSG00000034621	Gpatch8	5430405G24Rik|AU018890|Fbm1|Gpatc8|mKIAA0553	G patch domain containing 8	protein-coding
22816	chr19	32647087	32647434	+	5.24	6.18	1.53	4.66	1.69e-09	8.66e-09	0	NA	intron (NM_011864	intron 8 of 12)	intron (NM_011864	intron 8 of 12)	27255	NM_011864	23972	Mm.203916	NM_011864	ENSMUSG00000024899	Papss2	1810018P12Rik|AI159688|AtpsU2|Atpsk2|Sk2|bm	3'-phosphoadenosine 5'-phosphosulfate synthase 2	protein-coding
33609	chr5	45507724	45508772	+	7.55	8.5	3.84	4.66	3.19e-07	1.11e-06	0	NA	intron (NM_024434	intron 10 of 12)	intron (NM_024434	intron 10 of 12)	-11981	NM_025895	66999	Mm.283045	NM_025895	ENSMUSG00000015804	Med28	1500003D12Rik|AI451633|AU045690|Eg1|FKSG20|magicin	mediator complex subunit 28	protein-coding
34015	chrX	23183875	23184168	+	4.99	5.94	1.28	4.66	3.71e-07	1.28e-06	0	NA	Intergenic	MTD|LTR|ERVL-MaLR	82781	NM_001310466	67455	Mm.224306	NM_026167	ENSMUSG00000036782	Klhl13	1200009K10Rik|AI451128|Bklhd2|D130072F20Rik	kelch-like 13	protein-coding
38657	chrX	135100979	135101231	+	4.36	5.31	0.65	4.66	1.87e-06	5.67e-06	0	NA	Intergenic	Intergenic	-40769	NR_040282	320606	Mm.439072	NR_040281	ENSMUSG00000089759	3632454L22Rik	-	RIKEN cDNA 3632454L22 gene	ncRNA
368	chr7	80166713	80167195	+	8.19	9.14	4.49	4.65	1.37e-48	4.36e-46	0	NA	Intergenic	Intergenic	-19887	NM_013659	20352	Mm.275909	NM_013659	ENSMUSG00000030539	Sema4b	SemC|Semac|mKIAA1745	sema domain	immunoglobulin domain (Ig)	transmembrane domain (TM) and short cytoplasmic domain	(semaphorin) 4B	protein-coding
1535	chr11	60436493	60437185	+	7.62	8.56	3.91	4.65	3.68e-32	2.81e-30	0	NA	intron (NM_025757	intron 4 of 5)	intron (NM_025757	intron 4 of 5)	-17752	NM_021354	13495	Mm.41803	NM_021354	ENSMUSG00000020537	Drg2	AI255295|AI461605|DRG-2	developmentally regulated GTP binding protein 2	protein-coding
1700	chr9	69431569	69432505	+	7.47	8.41	3.77	4.65	3.73e-31	2.57e-29	0	NA	intron (NM_145618	intron 15 of 15)	intron (NM_145618	intron 15 of 15)	-21646	NM_007585	12306	Mm.238343	NM_007585	ENSMUSG00000032231	Anxa2	AW215814|Cal1h	annexin A2	protein-coding
3052	chr19	30923920	30924601	+	7.4	8.34	3.69	4.65	2.67e-25	1.03e-23	0	NA	intron (NM_001013833	intron 4 of 17)	intron (NM_001013833	intron 4 of 17)	6702	NR_033643	625995	Mm.454508	NR_033643		Gm6642	EG625995	ubiquitin-like 5 pseudogene	pseudo
3967	chr2	146306967	146307562	+	7.01	7.95	3.3	4.65	6.77e-23	2e-21	0	NA	intron (NM_001033348	intron 38 of 40)	intron (NM_001033348	intron 38 of 40)	47978	NR_040619	77806	Mm.392819	NR_040619	ENSMUSG00000085958	A930019D19Rik	-	RIKEN cDNA A930019D19 gene	ncRNA
4365	chr19	31114627	31115186	+	6.83	7.78	3.13	4.65	5.18e-22	1.39e-20	0	NA	intron (NM_001013833	intron 3 of 17)	intron (NM_001013833	intron 3 of 17)	32065	NM_031249	83410	Mm.22031	NM_031249	ENSMUSG00000053536	Cstf2t	64kDa|C77975|tCstF-64|tauCstF-64	cleavage stimulation factor	3' pre-RNA subunit 2	tau	protein-coding
8536	chrX	101963552	101964187	+	6.29	7.23	2.58	4.65	1.85e-16	2.54e-15	0	NA	intron (NM_001163610	intron 1 of 7)	intron (NM_001163610	intron 1 of 7)	107438	NM_001278534	331474	Mm.23297	NM_183318	ENSMUSG00000049191	Rtl5	6430402L03Rik|Mar5|Mart5|Rgag4|mKIAA2001	retrotransposon Gag like 5	protein-coding
8568	chr9	123285571	123285979	+	6.35	7.29	2.64	4.65	1.96e-16	2.67e-15	0	NA	Intergenic	Intergenic	-24986	NM_001002267	72309	Mm.8569	NM_001002267	ENSMUSG00000054871	Tmem158	2310037P21Rik|Ris1	transmembrane protein 158	protein-coding
9471	chr11	111688382	111688873	+	6.36	7.3	2.66	4.65	1.21e-15	1.5e-14	0	NA	Intergenic	Intergenic	622463	NM_008425	16518	Mm.4951	NM_008425	ENSMUSG00000041695	Kcnj2	IRK1|Kcnf1|Kir2.1	potassium inwardly-rectifying channel	subfamily J	member 2	protein-coding
12618	chrX	102115527	102116045	+	5.87	6.81	2.16	4.65	1.73e-13	1.61e-12	0	NA	Intergenic	Intergenic	-3679	NM_027181	69713	Mm.371635	NM_027181	ENSMUSG00000079480	Pin4	2410002I22Rik|EPVH|Par14	protein (peptidyl-prolyl cis/trans isomerase) NIMA-interacting	4 (parvulin)	protein-coding
13568	chr1	94149972	94150341	+	6.05	6.99	2.34	4.65	5.79e-13	5e-12	0	NA	Intergenic	Intergenic	-97603	NM_008798	18566	Mm.5024	NM_008798	ENSMUSG00000026285	Pdcd1	Ly101|PD-1|Pdc1	programmed cell death 1	protein-coding
23077	chr1	71932162	71932473	+	5.18	6.13	1.48	4.65	1.96e-09	9.96e-09	0	NA	Intergenic	Intergenic	44205	NR_027659	667931	Mm.214128	NR_027658	ENSMUSG00000099707	Gm8883	EG667931|Gm554	predicted gene 8883	ncRNA
24082	chr9	41051647	41052023	+	5.17	6.11	1.46	4.65	3.55e-09	1.73e-08	0	NA	intron (NM_176860	intron 1 of 13)	intron (NM_176860	intron 1 of 13)	27671	NM_001357412	72828	Mm.133615	NM_176860	ENSMUSG00000032020	Ubash3b	2810457I06Rik|BB125008|STS-1|TULA-2|p70	ubiquitin associated and SH3 domain containing	B	protein-coding
34938	chr14	106156671	106156902	+	4.67	5.61	0.97	4.65	5.28e-07	1.77e-06	0	NA	Intergenic	Intergenic	50588	NR_073203	212085	Mm.78128	NM_198601	ENSMUSG00000022113	Trim52	4921513B05Rik	tripartite motif-containing 52	protein-coding
2343	chr2	69380241	69381204	+	7.63	8.57	3.93	4.64	7.8e-28	3.9e-26	0	NA	intron (NM_175512	intron 1 of 4)	intron (NM_175512	intron 1 of 4)	260	NM_175512	241452	Mm.211655	NM_175512	ENSMUSG00000027068	Dhrs9	C730025I08Rik|Rdh15	dehydrogenase/reductase (SDR family) member 9	protein-coding
2548	chr1	163563568	163564446	+	7.24	8.19	3.55	4.64	5.41e-27	2.49e-25	0	NA	Intergenic	Intergenic	-160338	NM_178883	98376	Mm.32901	NM_178883	ENSMUSG00000040124	Gorab	NTKL-BP1|SCYL1-BP1|Scyl1bp1	golgin	RAB6-interacting	protein-coding
3103	chr4	107553673	107554256	+	7.31	8.26	3.61	4.64	3.88e-25	1.47e-23	0	NA	intron (NM_147221	intron 2 of 10)	intron (NM_147221	intron 2 of 10)	119245	NM_147221	230587	Mm.331757	NM_147221	ENSMUSG00000034762	Glis1	Gli5|Gli6|GliH1	GLIS family zinc finger 1	protein-coding
3332	chr4	83916932	83917540	+	7.09	8.04	3.4	4.64	1.54e-24	5.42e-23	0	NA	Intergenic	Intergenic	127643	NR_130998	78238	Mm.243903	NR_130998	ENSMUSG00000085217	6030471H07Rik	-	RIKEN cDNA 6030471H07 gene	ncRNA
11187	chr13	109802278	109802528	+	5.94	6.89	2.24	4.64	2.15e-14	2.26e-13	0	NA	intron (NM_011056	intron 7 of 16)	intron (NM_011056	intron 7 of 16)	-101406	NR_035442	100316683		NR_035442	ENSMUSG00000084651	Mir1904	Mirn1904|mmu-mir-1904	microRNA 1904	ncRNA
18618	chrX	53403316	53403747	+	5.38	6.32	1.68	4.64	8.72e-11	5.49e-10	0	NA	Intergenic	Intergenic	-31387	NM_175147	69501	Mm.63828	NM_175147	ENSMUSG00000060967	Etd	1700030K02Rik	embryonic testis differentiation	protein-coding
26527	chr1	121396620	121396866	+	4.99	5.94	1.3	4.64	1.34e-08	5.93e-08	0	NA	Intergenic	Intergenic	-34324	NM_001025156	70829	Mm.25788	NM_027567	ENSMUSG00000026339	Ccdc93	4633402D15Rik|9230102M16Rik	coiled-coil domain containing 93	protein-coding
296	chr8	64726014	64726967	+	8.36	9.3	4.67	4.63	1.16e-51	4.61e-49	0	NA	intron (NM_025436	intron 2 of 5)	intron (NM_025436	intron 2 of 5)	7088	NM_025436	66234	Mm.30119	NM_025436	ENSMUSG00000031604	Msmo1	1500001G16Rik|C78600|DESP4|ERG25|Sc4mol	methylsterol monoxygenase 1	protein-coding
829	chr5	93104950	93105949	+	7.85	8.8	4.16	4.63	3.14e-39	4.43e-37	0	NA	intron (NM_001009818	intron 1 of 9)	B2_Mm1a|SINE|B2	12033	NM_001009818	52398	Mm.394184	NM_001009818	ENSMUSG00000058013	2020-09-11	6230410I01Rik|AW548875|D5Ertd606e	septin 11	protein-coding
1920	chr1	162076433	162077143	+	7.66	8.6	3.97	4.63	7.54e-30	4.61e-28	0	NA	intron (NM_001038619	intron 16 of 20)	intron (NM_001038619	intron 16 of 20)	71819	NR_040562	72753	Mm.452125	NR_040562	ENSMUSG00000090260	2810442N19Rik	-	RIKEN cDNA 2810442N19 gene	ncRNA
2957	chr1	40444600	40445260	+	7.44	8.38	3.75	4.63	1.17e-25	4.65e-24	0	NA	intron (NM_001025602	intron 6 of 10)	intron (NM_001025602	intron 6 of 10)	5301	NM_001025602	17082	Mm.289824	NM_010743	ENSMUSG00000026069	Il1rl1	DER4|Fit-1|Ly84|ST2L|St2|St2-rs1|T1|T1/ST2	interleukin 1 receptor-like 1	protein-coding
8845	chr8	116552163	116552578	+	6.17	7.11	2.48	4.63	3.46e-16	4.59e-15	0	NA	Intergenic	Intergenic	47355	NM_029297	75465	Mm.23114	NM_029297	ENSMUSG00000034467	Dynlrb2	1700009A04Rik|DNLC2B|Dncl2b	dynein light chain roadblock-type 2	protein-coding
10242	chr16	32398117	32398606	+	6.15	7.1	2.47	4.63	4.79e-15	5.48e-14	0	NA	Intergenic	URR1B|DNA|hAT-Charlie	-2145	NM_001160402	277203	Mm.484240	NM_001160402	ENSMUSG00000079625	Tm4sf19	EG277203	transmembrane 4 L six family member 19	protein-coding
16692	chr10	95904754	95905004	+	5.52	6.46	1.83	4.63	1.62e-11	1.14e-10	0	NA	Intergenic	RLTR17|LTR|ERVK	-35784	NM_001001932	216238	Mm.210035	NM_001001932	ENSMUSG00000036499	Eea1	A430109M19Rik|B230358H09Rik|ZFYVE2	early endosome antigen 1	protein-coding
24886	chrX	9769556	9769939	+	5.13	6.08	1.45	4.63	5.59e-09	2.63e-08	0	NA	Intergenic	Intergenic	-77200	NM_026096	67334	Mm.46146	NM_026096	ENSMUSG00000040456	Hypm	1700054O13Rik|H2al3	huntingtin interacting protein M	protein-coding
27226	chr10	69195507	69195954	+	5.15	6.09	1.46	4.63	1.95e-08	8.39e-08	0	NA	Intergenic	(CATG)n|Simple_repeat|Simple_repeat	-12822	NM_001252636	69288	Mm.26659	NM_001081347	ENSMUSG00000019944	Rhobtb1	1700008H16Rik|3110048G13Rik|AI173445|AI573858|AV350930	Rho-related BTB domain containing 1	protein-coding
30637	chr16	11041261	11041667	+	4.91	5.86	1.23	4.63	9.56e-08	3.66e-07	0	NA	Intergenic	MTA_Mm|LTR|ERVL-MaLR	-24834	NM_009223	20621	Mm.325800	NM_009223	ENSMUSG00000037972	Snn	2810407J07Rik|AI848521|AW547286	stannin	protein-coding
30757	chr19	15576877	15577119	+	4.91	5.86	1.23	4.63	1.01e-07	3.83e-07	0	NA	Intergenic	Intergenic	347624	NM_001205339	107272	Mm.289936	NM_177420	ENSMUSG00000024640	Psat1	D8Ertd814e|EPIP|PSA|Psat	phosphoserine aminotransferase 1	protein-coding
1174	chr19	57825145	57826086	+	7.94	8.89	4.27	4.62	4.63e-35	4.62e-33	0	NA	intron (NM_181415	intron 26 of 28)	intron (NM_181415	intron 26 of 28)	214581	NM_181415	226255	Mm.245340	NM_181415	ENSMUSG00000054843	Atrnl1	AI504415|AW555641|Alp|Atrnl|Atrnlp	attractin like 1	protein-coding
1240	chr1	166043537	166044408	+	7.85	8.79	4.16	4.62	1.62e-34	1.53e-32	0	NA	Intergenic	Intergenic	-41338	NM_198932	18986	Mm.245261	NM_011137	ENSMUSG00000026565	Pou2f1	2810482H01Rik|NF-A1|Oct-1|Oct1|Otf-1|Otf1	POU domain	class 2	transcription factor 1	protein-coding
1432	chr8	84125469	84126179	+	7.73	8.67	4.05	4.62	6.45e-33	5.28e-31	0	NA	promoter-TSS (NM_001013384)	promoter-TSS (NM_001013384)	-165	NM_001013384	244550	Mm.334654	NM_001013384	ENSMUSG00000012889	Podnl1	5832418A03Rik|Gm506	podocan-like 1	protein-coding
2638	chr9	56489408	56490150	+	7.29	8.23	3.62	4.62	1.18e-26	5.27e-25	0	NA	intron (NM_025812	intron 8 of 9)	intron (NM_025812	intron 8 of 9)	71160	NM_025812	66867	Mm.150856	NM_025812	ENSMUSG00000032329	Hmg20a	1200004E06Rik|5730490E10Rik|Hmgxb1|Ibraf	high mobility group 20A	protein-coding
2958	chr14	50955442	50956717	+	7.33	8.27	3.65	4.62	1.18e-25	4.66e-24	0	NA	promoter-TSS (NM_001123371)	promoter-TSS (NM_001123371)	-62	NM_001123371	667034	Mm.482171	NM_001123371	ENSMUSG00000068417	Pnp2	-	purine-nucleoside phosphorylase 2	protein-coding
3444	chr9	36842171	36842915	+	7.28	8.23	3.61	4.62	3.36e-24	1.14e-22	0	NA	intron (NM_001357611	intron 1 of 9)	MIR|SINE|MIR	8969	NM_001357611	235180	Mm.5264	NM_183171	ENSMUSG00000032118	Fez1	UNC-76|UNC76	fasciculation and elongation protein zeta 1 (zygin I)	protein-coding
4185	chr2	120959341	120959775	+	7.08	8.02	3.4	4.62	2.27e-22	6.35e-21	0	NA	intron (NM_009461	intron 3 of 46)	URR1B|DNA|hAT-Charlie	11157	NM_009461	22222	Mm.389330	NM_009461	ENSMUSG00000027272	Ubr1	AI504731	ubiquitin protein ligase E3 component n-recognin 1	protein-coding
4435	chr16	46008090	46008548	+	6.75	7.69	3.07	4.62	6.89e-22	1.82e-20	0	NA	intron (NM_001134480	intron 1 of 3)	intron (NM_001134480	intron 1 of 3)	2094	NM_001134480	433022	Mm.380993	NM_001134480	ENSMUSG00000087141	Plcxd2	AW494639|EG433022	phosphatidylinositol-specific phospholipase C	X domain containing 2	protein-coding
5460	chr12	57159901	57160299	+	6.61	7.55	2.94	4.62	4.18e-20	8.98e-19	0	NA	intron (NM_001167976	intron 1 of 10)	intron (NM_001167976	intron 1 of 10)	543	NM_001167976	217593	Mm.32835	NM_172577	ENSMUSG00000035472	Slc25a21	9930033G19Rik|A630030I10|BB158148	solute carrier family 25 (mitochondrial oxodicarboxylate carrier)	member 21	protein-coding
28085	chr4	109647345	109647645	+	4.9	5.84	1.23	4.62	2.92e-08	1.22e-07	0	NA	Intergenic	Intergenic	17877	NM_007671	12580	Mm.1912	NM_007671	ENSMUSG00000028551	Cdkn2c	C77269|INK4c|p18|p18-INK4c|p18-INK6|p18INK4c	cyclin dependent kinase inhibitor 2C	protein-coding
28160	chr7	132842468	132842773	+	4.9	5.84	1.23	4.62	3.02e-08	1.26e-07	0	NA	intron (NM_028095	intron 3 of 5)	intron (NM_028095	intron 3 of 5)	10027	NM_028095	72096	Mm.28631	NM_028095	ENSMUSG00000030960	Eef1akmt2	2010208K18Rik|Mettl10	EEF1A lysine methyltransferase 2	protein-coding
78	chr5	136403007	136404177	+	9.06	10	5.39	4.61	1.45e-70	2.19e-67	0	NA	intron (NM_001291238	intron 3 of 22)	intron (NM_001291238	intron 3 of 22)	-27789	NR_030500	723975		NR_030500	ENSMUSG00000106479	Mir721	Mirn721|miRY|mir-721|mmu-mir-721	microRNA 721	ncRNA
99	chr9	41479644	41480830	+	8.86	9.8	5.2	4.61	1.17e-66	1.39e-63	0	NA	intron (NR_131931	intron 1 of 2)	intron (NR_131931	intron 1 of 2)	5344	NR_131931	73144	Mm.38166	NM_001033153	ENSMUSG00000074415	3110039I08Rik	2610203C20Rik|AI848448|D230004N17Rik|D3Mgi9|Mir100hg	RIKEN cDNA 3110039I08 gene	ncRNA
234	chr3	36467317	36468376	+	8.46	9.4	4.79	4.61	3.67e-55	1.84e-52	0	NA	intron (NM_009673	intron 2 of 12)	intron (NM_009673	intron 2 of 12)	7678	NR_105976	102466786		NR_105976	ENSMUSG00000098808	Mir7009	Gm27472|mmu-mir-7009	microRNA 7009	ncRNA
722	chr16	45124291	45125186	+	8.12	9.06	4.45	4.61	1.43e-40	2.33e-38	0	NA	intron (NM_026439	intron 6 of 7)	intron (NM_026439	intron 6 of 7)	30727	NM_026439	67896	Mm.181074	NM_026439	ENSMUSG00000022665	Ccdc80	2610001E17Rik|DRO1|Ssg1|Urb	coiled-coil domain containing 80	protein-coding
2433	chr16	22389060	22389691	+	7.6	8.54	3.94	4.61	1.89e-27	9.1e-26	0	NA	intron (NM_001358428	intron 11 of 12)	intron (NM_001358428	intron 11 of 12)	48993	NM_001358428	104156	Mm.155708	NM_023794	ENSMUSG00000013089	Etv5	1110005E01Rik|8430401F14Rik|ERM	ets variant 5	protein-coding
2789	chr15	7597321	7598025	+	7.27	8.21	3.61	4.61	3.5e-26	1.47e-24	0	NA	Intergenic	Intergenic	-199278	NM_001289498	268780	Mm.203208	NM_178748	ENSMUSG00000042961	Egflam	5930412K08|AU040377	EGF-like	fibronectin type III and laminin G domains	protein-coding
5558	chr19	42079863	42080375	+	6.66	7.6	2.99	4.61	5.63e-20	1.19e-18	0	NA	intron (NM_198108	intron 1 of 4)	MLT1H|LTR|ERVL-MaLR	6251	NM_198108	226123	Mm.259441	NM_198108	ENSMUSG00000049670	Morn4	-	MORN repeat containing 4	protein-coding
8203	chr18	38387877	38388596	+	6.37	7.31	2.7	4.61	8.7e-17	1.24e-15	0	NA	Intergenic	Intergenic	-30671	NM_001355749	65113	Mm.102496	NM_022996	ENSMUSG00000024425	Ndfip1	0610010M22Rik|N4wbp5	Nedd4 family interacting protein 1	protein-coding
8530	chr2	80420118	80420582	+	6.4	7.34	2.74	4.61	1.84e-16	2.53e-15	0	NA	intron (NM_011356	intron 3 of 5)	intron (NM_011356	intron 3 of 5)	27046	NM_011356	20378	Mm.427436	NM_011356	ENSMUSG00000027004	Frzb	Frp|Sfrp3|frezzled|fritz|frzb-1	frizzled-related protein	protein-coding
26758	chr8	26831749	26832097	+	4.91	5.85	1.24	4.61	1.5e-08	6.56e-08	0	NA	Intergenic	Intergenic	-7500	NR_045904	72316	Mm.490534	NR_045904	ENSMUSG00000100335	2310008N11Rik	-	RIKEN cDNA 2310008N11 gene	ncRNA
27915	chrX	7280869	7281250	+	4.9	5.84	1.23	4.61	2.69e-08	1.13e-07	0	NA	intron (NM_001243762	intron 2 of 13)	MIRc|SINE|MIR	-32562	NR_030242	751544		NR_030242	ENSMUSG00000070139	Mir532	Mirn532|mir-532|mmu-mir-532	microRNA 532	ncRNA
28062	chrX	114340961	114341330	+	4.89	5.83	1.23	4.61	2.88e-08	1.2e-07	0	NA	Intergenic	RLTR45|LTR|ERVK	-133188	NM_001290477	237010	Mm.132583	NM_172781	ENSMUSG00000025597	Klhl4	B130014A11|C130018J01Rik	kelch-like 4	protein-coding
71961	chr17	70501966	70502286	+	5.65	6.59	1.98	4.61	0.00249	0.00405	0.00405	NA	intron (NM_001347411	intron 4 of 14)	intron (NM_001347411	intron 4 of 14)	-19768	NM_001347414	224997	Mm.311840	NM_027712	ENSMUSG00000003279	Dlgap1	4933422O14Rik|9630002F18|AI845682|AI848168|BB075781|D17Bwg0511e|GKAP/SAPAP|GKPA/SAPAP|Gkap|Sapap1|mKIAA4162	DLG associated protein 1	protein-coding
48	chr2	50690093	50691370	+	9.1	10.05	5.44	4.6	5.74e-77	1.4e-73	0	NA	Intergenic	L1MC4|LINE|L1	-218953	NR_033595	227885	Mm.301654	NR_033595	ENSMUSG00000083270	Gm13498	-	heat shock protein 90 alpha (cytosolic)	class B member 1 pseudogene	pseudo
115	chr3	37360469	37361357	+	8.7	9.64	5.04	4.6	1e-64	1.03e-61	0	NA	intron (NM_008006	intron 1 of 2)	intron (NM_008006	intron 1 of 2)	12260	NM_008006	14173	Mm.473689	NM_008006	ENSMUSG00000037225	Fgf2	Fgf-2|Fgfb|bFGF	fibroblast growth factor 2	protein-coding
481	chr17	5327261	5328443	+	8.46	9.4	4.8	4.6	1.07e-45	2.6e-43	0	NA	intron (NM_001085355	intron 15 of 19)	intron (NM_001085355	intron 15 of 19)	90915	NM_175349	106557	Mm.432764	NM_175349	ENSMUSG00000101959	Ldhal6b	4933402O15Rik|AI326310|LDHL|Ldhal	lactate dehydrogenase A-like 6B	protein-coding
1562	chr16	86137914	86138519	+	7.58	8.53	3.92	4.6	5.97e-32	4.48e-30	0	NA	Intergenic	RMER16C|LTR|ERVK	-237091	NM_011782	23794	Mm.112933	NM_011782	ENSMUSG00000022894	Adamts5	9530092O11Rik|ADAM-TS5|ADAMTS1|ADAMTS11|ADMP-2|AI481094|ASMP-2	a disintegrin-like and metallopeptidase (reprolysin type) with thrombospondin type 1 motif	5 (aggrecanase-2)	protein-coding
2816	chr2	117999611	118000287	+	7.27	8.21	3.61	4.6	4.19e-26	1.74e-24	0	NA	intron (NR_126479	intron 8 of 9)	intron (NR_126479	intron 8 of 9)	111253	NR_126479	329496	Mm.235844	NR_126479	ENSMUSG00000087203	Gm13986	C230060E24	predicted gene 13986	ncRNA
5062	chr13	31577431	31577998	+	6.71	7.66	3.05	4.6	9.96e-21	2.3e-19	0	NA	intron (NR_029439	intron 3 of 5)	intron (NR_029439	intron 3 of 5)	4799	NR_029439	71307	Mm.376184	NR_029439	ENSMUSG00000038408	1700018A04Rik	4930551G20Rik|4933439J11Rik	RIKEN cDNA 1700018A04 gene	ncRNA
5101	chr14	20914442	20914891	+	6.75	7.69	3.09	4.6	1.15e-20	2.65e-19	0	NA	Intergenic	RLTR20B5_MM|LTR|ERVK	-14732	NM_009502	22330	Mm.279361	NM_009502	ENSMUSG00000021823	Vcl	9430097D22|AA571387|AI462105|AW545629	vinculin	protein-coding
7474	chr15	34790290	34790668	+	6.34	7.28	2.69	4.6	1.46e-17	2.29e-16	0	NA	Intergenic	Intergenic	-46876	NM_181317	16539	Mm.71045	NM_181317	ENSMUSG00000050963	Kcns2	E130006J24Rik|Kv9.2	K+ voltage-gated channel	subfamily S	2	protein-coding
8321	chr2	137721910	137722399	+	6.24	7.18	2.57	4.6	1.11e-16	1.57e-15	0	NA	Intergenic	Intergenic	-534430	NM_001025431	228662	Mm.153405	NM_145534	ENSMUSG00000062098	Btbd3	mKIAA0952	BTB (POZ) domain containing 3	protein-coding
8493	chr12	81099148	81099543	+	6.23	7.17	2.57	4.6	1.71e-16	2.36e-15	0	NA	intron (NM_001146217	intron 1 of 12)	MLT1H2|LTR|ERVL-MaLR	-66806	NR_037227	100526532		NR_037227	ENSMUSG00000092673	Mir3067	mir-3067|mmu-mir-3067	microRNA 3067	ncRNA
23217	chr11	16737425	16737706	+	5.18	6.12	1.53	4.6	2.13e-09	1.08e-08	0	NA	Intergenic	L1ME1|LINE|L1	-14638	NM_207655	13649	Mm.8534	NM_007912	ENSMUSG00000020122	Egfr	9030024J15Rik|AI552599|Erbb|Errb1|Errp|Wa5|wa-2|wa2	epidermal growth factor receptor	protein-coding
26719	chr6	106809217	106809535	+	4.92	5.86	1.26	4.6	1.46e-08	6.42e-08	0	NA	Intergenic	Intergenic	-9289	NM_021449	58799	Mm.290085	NM_021449	ENSMUSG00000005362	Crbn	2610203G15Rik|2900045O07Rik|AF229032|AW108261|piL	cereblon	protein-coding
276	chr6	122869406	122870535	+	8.38	9.32	4.73	4.59	4.81e-53	2.04e-50	0	NA	Intergenic	Intergenic	-4587	NM_026267	67602	Mm.288114	NM_026267	ENSMUSG00000030327	Necap1	1200016B17Rik|AI747569|mFLJ00061	NECAP endocytosis associated 1	protein-coding
378	chr16	14131501	14132599	+	8.31	9.25	4.67	4.59	3.65e-48	1.13e-45	0	NA	intron (NM_001081154	intron 15 of 26)	intron (NM_001081154	intron 15 of 26)	27224	NM_001081154	223989	Mm.85442	NM_001081154	ENSMUSG00000060657	Marf1	4921513D23Rik|BC031575|C87306|E030019O05|Lkap|mKIAA0430	meiosis regulator and mRNA stability 1	protein-coding
455	chr17	28414941	28416114	+	8.18	9.12	4.53	4.59	4.72e-46	1.22e-43	0	NA	intron (NM_010220	intron 6 of 10)	intron (NM_010220	intron 6 of 10)	-50311	NM_021478	22157	Mm.42102	NM_021478	ENSMUSG00000037446	Tulp1	Tulp1l	tubby like protein 1	protein-coding
458	chr5	53490465	53491220	+	8.17	9.12	4.53	4.59	4.88e-46	1.25e-43	0	NA	Intergenic	Intergenic	-64937	NM_001080928	19664	Mm.209292	NM_009035	ENSMUSG00000039191	Rbpj	AI843960|CBF1|Igkjrb|Igkrsbp|RBP-J|RBP-J kappa|RBP-Jkappa|RBPjk|Rbpsuh	recombination signal binding protein for immunoglobulin kappa J region	protein-coding
1910	chr8	64615419	64616116	+	7.44	8.39	3.8	4.59	6.43e-30	3.95e-28	0	NA	intron (NM_013494	intron 3 of 8)	intron (NM_013494	intron 3 of 8)	77342	NM_013494	12876	Mm.31395	NM_013494	ENSMUSG00000037852	Cpe	CPH|Cph-1|Cph1|NF-alpha1|R74677|fat	carboxypeptidase E	protein-coding
3468	chr16	44001965	44002407	+	6.96	7.9	3.32	4.59	4.08e-24	1.38e-22	0	NA	intron (NM_001359085	intron 8 of 16)	intron (NM_001359085	intron 8 of 16)	-11666	NR_037302	100499519		NR_037302	ENSMUSG00000093912	Mir3470b	mmu-mir-3470b	microRNA 3470b	ncRNA
4114	chr6	82907907	82908488	+	6.84	7.78	3.19	4.59	1.64e-22	4.68e-21	0	NA	Intergenic	MER90|LTR|ERV1	-26344	NR_040520	69652	Mm.96357	NR_040520	ENSMUSG00000100291	2310069B03Rik	-	RIKEN cDNA 2310069B03 gene	ncRNA
4267	chr14	78362984	78363555	+	6.79	7.73	3.14	4.59	3.44e-22	9.46e-21	0	NA	Intergenic	Intergenic	-55226	NM_011613	21943	Mm.249221	NM_011613	ENSMUSG00000022015	Tnfsf11	Ly109l|ODF|OPGL|RANKL|Trance	tumor necrosis factor (ligand) superfamily	member 11	protein-coding
7875	chr3	137552985	137553433	+	6.52	7.46	2.87	4.59	3.88e-17	5.77e-16	0	NA	promoter-TSS (NM_177665)	promoter-TSS (NM_177665)	-587	NM_177665	229862	Mm.246591	NM_177665	ENSMUSG00000055138	Gm4861	9230109N16|EG229862	predicted gene 4861	protein-coding
16379	chrX	52292633	52292950	+	5.51	6.45	1.85	4.59	1.22e-11	8.72e-11	0	NA	intron (NM_016697	intron 7 of 7)	intron (NM_016697	intron 7 of 7)	85390	NR_105805	102465202		NR_105805	ENSMUSG00000105738	Mir6384	mmu-mir-6384	microRNA 6384	ncRNA
17152	chr5	74712836	74713137	+	5.49	6.43	1.84	4.59	2.49e-11	1.7e-10	0	NA	Intergenic	Intergenic	-10083	NM_001159577	16924	Mm.440403	NM_010727	ENSMUSG00000029228	Lnx1	Lnx	ligand of numb-protein X 1	protein-coding
19569	chr16	92710177	92710590	+	5.32	6.26	1.66	4.59	1.84e-10	1.1e-09	0	NA	intron (NM_001111022	intron 2 of 6)	intron (NM_001111022	intron 2 of 6)	-13054	NM_001111023	12394	Mm.4081	NM_009821	ENSMUSG00000022952	Runx1	AML1|CBF-alpha-2|Cbfa2|Pebp2a2|Pebpa2b	runt related transcription factor 1	protein-coding
26098	chr2	107036069	107036469	+	5.09	6.03	1.45	4.59	1.06e-08	4.76e-08	0	NA	Intergenic	Intergenic	23382	NM_008045	14308	Mm.249525	NM_008045	ENSMUSG00000027120	Fshb	FSH|FSH-B|FSH-beta|Fshbeta	follicle stimulating hormone beta	protein-coding
40519	chr1	178291794	178292003	+	4.3	5.24	0.65	4.59	3.37e-06	9.75e-06	0	NA	Intergenic	Intergenic	-27255	NM_025511	66359	Mm.489720	NM_025511	ENSMUSG00000026500	Cox20	2310005N03Rik|Fam36a	COX20 Cox2 chaperone	protein-coding
496	chr6	51594324	51595198	+	8.46	9.4	4.82	4.58	2.99e-45	7.06e-43	0	NA	Intergenic	Intergenic	49468	NM_001361577	71982	Mm.294166	NM_028035	ENSMUSG00000038301	Snx10	2410004M09Rik	sorting nexin 10	protein-coding
1027	chr1	136656472	136657220	+	7.92	8.86	4.28	4.58	1.12e-36	1.28e-34	0	NA	Intergenic	Intergenic	-26550	NR_045324	100503460	Mm.30630	NR_045324	ENSMUSG00000097113	Gm19705	-	predicted gene	19705	ncRNA
1097	chr1	72564256	72565024	+	7.79	8.73	4.15	4.58	8.2e-36	8.76e-34	0	NA	Intergenic	Intergenic	-18611	NM_018817	54380	Mm.274232	NM_018817	ENSMUSG00000039354	Smarcal1	6030401P21Rik|AI851716|Mharp	SWI/SNF related matrix associated	actin dependent regulator of chromatin	subfamily a-like 1	protein-coding
2227	chr9	85769045	85769838	+	7.37	8.31	3.73	4.58	2.5e-28	1.32e-26	0	NA	Intergenic	Intergenic	-20107	NM_175371	108837	Mm.22315	NM_175371	ENSMUSG00000035941	Ibtk	5430411K16Rik|AA409502|BTKI|mKIAA1417	inhibitor of Bruton agammaglobulinemia tyrosine kinase	protein-coding
2405	chr9	75064624	75065379	+	7.41	8.35	3.77	4.58	1.47e-27	7.17e-26	0	NA	Intergenic	MLT1N2|LTR|ERVL-MaLR	-6205	NM_010864	17918	Mm.3645	NM_010864	ENSMUSG00000034593	Myo5a	9630007J19Rik|AI413174|AI661011|Dbv|MVa|Myo5|MyoVA|Sev-1|d|d-120J|flail|flr	myosin VA	protein-coding
3210	chr16	14350621	14351252	+	7.09	8.03	3.44	4.58	7.41e-25	2.7e-23	0	NA	Intergenic	L1MB3|LINE|L1	-10622	NM_008576	17250	Mm.196634	NM_008576	ENSMUSG00000023088	Abcc1	Abcc1a|Abcc1b|MRP|Mdrap|Mrp1	ATP-binding cassette	sub-family C (CFTR/MRP)	member 1	protein-coding
5688	chr3	100227467	100227898	+	6.57	7.51	2.92	4.58	8.7e-20	1.79e-18	0	NA	Intergenic	Intergenic	65219	NM_010269	14547	Mm.279228	NM_010269	ENSMUSG00000027865	Gdap2	C77050|D3Ertd801e	ganglioside-induced differentiation-associated-protein 2	protein-coding
9509	chr2	172543931	172544353	+	6.12	7.07	2.49	4.58	1.3e-15	1.6e-14	0	NA	Intergenic	Intergenic	-5451	NM_009335	21420	Mm.3629	NM_009335	ENSMUSG00000028640	Tfap2c	AA409384|AP2gamma|Ap-2.2|Stra2|Tcfap2c	transcription factor AP-2	gamma	protein-coding
22639	chrX	9139609	9139926	+	5.14	6.08	1.49	4.58	1.5e-09	7.75e-09	0	NA	Intergenic	Intergenic	35205	NM_001270700	75775	Mm.50374	NM_001270700	ENSMUSG00000045797	4930402K13Rik	-	RIKEN cDNA 4930402K13 gene	protein-coding
27830	chr7	84077326	84077576	+	4.91	5.85	1.26	4.58	2.6e-08	1.09e-07	0	NA	intron (NM_030728	intron 1 of 28)	intron (NM_030728	intron 1 of 28)	9054	NM_030728	80982	Mm.160389	NM_030728	ENSMUSG00000052353	Cemip	12H19.01.T7|6330404C01Rik|9930013L23Rik|AY007814|Kiaa1199	cell migration inducing protein	hyaluronan binding	protein-coding
27976	chr4	54269407	54269742	+	5.17	6.11	1.53	4.58	2.77e-08	1.16e-07	0	NA	Intergenic	Intergenic	443529	NM_028053	52076	Mm.27184	NM_028053	ENSMUSG00000028420	Tmem38b	1600017F22Rik|AA437809|AV051057|D4Ertd89e|TRIC-B|mg33b	transmembrane protein 38B	protein-coding
29722	chr4	54929726	54929980	+	4.87	5.81	1.23	4.58	6.32e-08	2.49e-07	0	NA	Intergenic	PB1D9|SINE|Alu	-18092	NM_172867	242466	Mm.102904	NM_172867	ENSMUSG00000060206	Zfp462	6030417H05|9430078C22Rik|Gt4-2|Zfpip	zinc finger protein 462	protein-coding
39319	chrX	9480775	9481056	+	4.34	5.29	0.71	4.58	2.31e-06	6.88e-06	0	NA	Intergenic	Intergenic	-11591	NM_007807	13058	Mm.200362	NM_007807	ENSMUSG00000015340	Cybb	C88302|CGD91-phox|Cgd|Cyd|Nox2|gp91-1|gp91phox	cytochrome b-245	beta polypeptide	protein-coding
13	chr9	90047899	90049045	+	9.54	10.48	5.9	4.57	4.77e-99	4.3e-95	0	NA	Intergenic	B1_Mus2|SINE|Alu	-5795	NM_007801	13036	Mm.2277	NM_007801	ENSMUSG00000032359	Ctsh	AL022844	cathepsin H	protein-coding
301	chr6	52825192	52826332	+	8.44	9.38	4.81	4.57	2.67e-51	1.04e-48	0	NA	intron (NM_173406	intron 2 of 4)	intron (NM_173406	intron 2 of 4)	83858	NM_001168277	231986	Mm.386865	NM_173406	ENSMUSG00000063568	Jazf1	AI591476|C820002C15|Jaz1|Tip27	JAZF zinc finger 1	protein-coding
5175	chr7	66576052	66576772	+	7.13	8.07	3.5	4.57	1.57e-20	3.55e-19	0	NA	Intergenic	Intergenic	113149	NM_080443	117589	Mm.34785	NM_080443	ENSMUSG00000030509	Asb7	AI449039|Asb-7|D030055C23Rik	ankyrin repeat and SOCS box-containing 7	protein-coding
5417	chr3	81943520	81944245	+	6.86	7.8	3.23	4.57	3.75e-20	8.11e-19	0	NA	intron (NM_177662	intron 3 of 7)	intron (NM_177662	intron 3 of 7)	11281	NM_177662	229445	Mm.254642	NM_177662	ENSMUSG00000028015	Ctso	A330105D01Rik|AI118514	cathepsin O	protein-coding
9139	chr3	121932856	121933250	+	6.28	7.22	2.65	4.57	6.15e-16	7.88e-15	0	NA	Intergenic	Intergenic	-20176	NM_172525	214137	Mm.229287	NM_172525	ENSMUSG00000039831	Arhgap29	6720461J18Rik|A830014I19|AU040217|B130017I01Rik|C76601|Parg1	Rho GTPase activating protein 29	protein-coding
12654	chr3	89703616	89704095	+	5.97	6.91	2.34	4.57	1.83e-13	1.7e-12	0	NA	Intergenic	Intergenic	-11167	NM_001038587	56417	Mm.316628	NM_019655	ENSMUSG00000027951	Adar	AV242451|Adar1|Adar1p110|Adar1p150|DRADA|mZaADAR	adenosine deaminase	RNA-specific	protein-coding
16976	chr12	85937498	85937812	+	5.68	6.62	2.04	4.57	2.13e-11	1.47e-10	0	NA	intron (NM_001347395	intron 27 of 32)	L1M5|LINE|L1	112705	NM_001347395	320244	Mm.132172	NM_177114	ENSMUSG00000012609	Ttll5	1700048H13Rik|2310009M18Rik|4930556H18Rik|AI428864|D630041K24Rik|R75373|Stamp|mKIAA0998	tubulin tyrosine ligase-like family	member 5	protein-coding
22933	chr17	25125603	25125942	+	5.31	6.25	1.68	4.57	1.8e-09	9.2e-09	0	NA	TTS (NM_001163416)	TTS (NM_001163416)	5012	NM_001163416	68509	Mm.328855	NM_026747	ENSMUSG00000044172	Ptx4	1110018H23Rik	pentraxin 4	protein-coding
33239	chrX	23411387	23411669	+	4.66	5.6	1.03	4.57	2.78e-07	9.8e-07	0	NA	Intergenic	ORR1F|LTR|ERVL-MaLR	-46446	NM_026167	67455	Mm.224306	NM_026167	ENSMUSG00000036782	Klhl13	1200009K10Rik|AI451128|Bklhd2|D130072F20Rik	kelch-like 13	protein-coding
35988	chr13	63672269	63672928	+	7.82	8.76	4.2	4.57	7.76e-07	2.53e-06	0	NA	Intergenic	Intergenic	61700	NR_126476	75522	Mm.54259	NR_126476	ENSMUSG00000113825	1700024I08Rik	-	RIKEN cDNA 1700024I08 gene	ncRNA
41184	chr13	59912051	59912274	+	4.33	5.27	0.71	4.57	4.12e-06	1.17e-05	0	NA	Intergenic	Intergenic	-89015	NM_153538	214290	Mm.233082	NM_153538	ENSMUSG00000035248	Zcchc6	6030448M23Rik|AA420405	zinc finger	CCHC domain containing 6	protein-coding
881	chr3	58168497	58169387	+	7.86	8.8	4.24	4.56	1.33e-38	1.76e-36	0	NA	Intergenic	Intergenic	-5135	NR_040538	67850	Mm.416968	NR_040538	ENSMUSG00000100666	1700007F19Rik	-	RIKEN cDNA 1700007F19 gene	ncRNA
1377	chr14	67074117	67074828	+	7.61	8.55	3.99	4.56	2.21e-33	1.88e-31	0	NA	Intergenic	Intergenic	-2001	NM_001360033	71978	Mm.273997	NM_028032	ENSMUSG00000022052	Ppp2r2a	2410004D02Rik|mKIAA1541	protein phosphatase 2	regulatory subunit B	alpha	protein-coding
1381	chr12	50038890	50039500	+	7.66	8.6	4.05	4.56	2.4e-33	2.04e-31	0	NA	Intergenic	RMER6D|LTR|ERVK	-558333	NR_045472	69054	Mm.417838	NR_045472	ENSMUSG00000100844	1810007C17Rik	-	RIKEN cDNA 1810007C17 gene	ncRNA
1827	chr9	41515120	41515739	+	7.67	8.61	4.05	4.56	2.31e-30	1.48e-28	0	NA	intron (NR_131930	intron 2 of 3)	intron (NR_131930	intron 2 of 3)	-15996	NR_029790	723892		NR_029790	ENSMUSG00000093011	Mir100	Mirn100|mir-100|mmu-mir-100	microRNA 100	ncRNA
2111	chr7	128024743	128025350	+	7.42	8.36	3.79	4.56	6.98e-29	3.88e-27	0	NA	Intergenic	B3|SINE|B2	20668	NM_001079932	434246	Mm.389924	NM_001079932	ENSMUSG00000042828	Trim72	BC067209|MG53	tripartite motif-containing 72	protein-coding
2121	chr9	71288630	71289316	+	7.58	8.52	3.96	4.56	7.61e-29	4.21e-27	0	NA	intron (NM_009022	intron 12 of 13)	intron (NM_009022	intron 12 of 13)	73184	NM_009022	19378	Mm.42016	NM_009022	ENSMUSG00000013584	Aldh1a2	AV116159|Aldh1a7|Raldh1|Raldh2	aldehyde dehydrogenase family 1	subfamily A2	protein-coding
3170	chr2	57229591	57230281	+	7.09	8.03	3.47	4.56	5.78e-25	2.14e-23	0	NA	Intergenic	Intergenic	-7742	NM_001145820	14571	Mm.3711	NM_010274	ENSMUSG00000026827	Gpd2	AA408484|AI448216|AU021455|AW494132|GPDH|Gdm1|Gpd-m|Gpdh-m|TISP38	glycerol phosphate dehydrogenase 2	mitochondrial	protein-coding
3442	chr1	90834682	90835348	+	7.52	8.46	3.9	4.56	3.34e-24	1.14e-22	0	NA	intron (NM_001243009	intron 1 of 40)	intron (NM_001243009	intron 1 of 40)	8956	NM_001243009	12835	Mm.7562	NM_009935	ENSMUSG00000048126	Col6a3	AI507288|Col6a-3	collagen	type VI	alpha 3	protein-coding
9328	chr13	95281778	95282123	+	6.28	7.22	2.66	4.56	9.14e-16	1.15e-14	0	NA	Intergenic	Intergenic	-31614	NM_001346782	218461	Mm.100167	NM_172263	ENSMUSG00000021684	Pde8b	B230331L10Rik|C030047E14Rik	phosphodiesterase 8B	protein-coding
11122	chr12	81123796	81124557	+	6.36	7.3	2.74	4.56	1.96e-14	2.07e-13	0	NA	intron (NM_001146217	intron 3 of 12)	L1MB7|LINE|L1	-41975	NR_037227	100526532		NR_037227	ENSMUSG00000092673	Mir3067	mir-3067|mmu-mir-3067	microRNA 3067	ncRNA
13596	chr13	52651884	52652281	+	5.86	6.8	2.24	4.56	5.95e-13	5.13e-12	0	NA	Intergenic	Intergenic	55200	NM_011518	20963	Mm.375031	NM_011518	ENSMUSG00000021457	Syk	Sykb	spleen tyrosine kinase	protein-coding
17708	chrX	167951229	167951614	+	5.65	6.59	2.02	4.56	4.04e-11	2.67e-10	0	NA	intron (NM_001033330	intron 3 of 19)	MER90|LTR|ERV1	-96344	NM_001290428	333605	Mm.426168	NM_001033330	ENSMUSG00000049176	Frmpd4	Gm196|PKAP1|Pdzd10|Pdzk10|Preso1|preso	FERM and PDZ domain containing 4	protein-coding
18615	chr7	98514425	98514741	+	5.62	6.56	2	4.56	8.69e-11	5.48e-10	0	NA	Intergenic	L1MC4|LINE|L1	20361	NM_001113379	434215	Mm.323057	NM_001113379	ENSMUSG00000090958	Lrrc32	AI426318|D11S833Eh|D7H11S833E|EG434215|Garp	leucine rich repeat containing 32	protein-coding
19759	chr16	50567322	50567759	+	5.42	6.36	1.8	4.56	2.14e-10	1.27e-09	0	NA	Intergenic	Intergenic	-22963	NR_040566	75211	Mm.399337	NR_040566		4930542D17Rik	-	RIKEN cDNA 4930542D17 gene	ncRNA
28261	chr19	46944410	46944644	+	4.92	5.86	1.3	4.56	3.19e-08	1.32e-07	0	NA	intron (NM_029810	intron 2 of 17)	RMER6A|LTR|ERVK	17824	NR_028353	76952	Mm.40965	NM_029810	ENSMUSG00000025041	Nt5c2	2010002I23Rik|CnII|Gm9751|Gmp|Nt5b|Pnt5|cN-II	5'-nucleotidase	cytosolic II	protein-coding
32221	chr1	106462614	106462929	+	4.84	5.78	1.23	4.56	1.86e-07	6.76e-07	0	NA	Intergenic	Lx8b|LINE|L1	83860	NR_106164	102466254		NR_106164	ENSMUSG00000098344	Mir3473f	Gm27846|mmu-mir-3473f	microRNA 3473f	ncRNA
55549	chr17	40890069	40890753	+	6.51	7.45	2.89	4.56	0.00013	0.000274	0.000274	NA	Intergenic	RMER6BA|LTR|ERVK	-9853	NM_027834	71583	Mm.158733	NM_027834	ENSMUSG00000054951	9130008F23Rik	-	RIKEN cDNA 9130008F23 gene	protein-coding
518	chr13	63770695	63771770	+	8.23	9.17	4.61	4.55	1.6e-44	3.62e-42	0	NA	Intergenic	Intergenic	-36934	NR_126476	75522	Mm.54259	NR_126476	ENSMUSG00000113825	1700024I08Rik	-	RIKEN cDNA 1700024I08 gene	ncRNA
815	chr5	64112189	64113030	+	7.91	8.85	4.3	4.55	1.87e-39	2.69e-37	0	NA	intron (NM_025700	intron 12 of 13)	intron (NM_025700	intron 12 of 13)	19670	NM_025700	66681	Mm.2325	NM_025700	ENSMUSG00000029171	Pgm1	3230402E02Rik|Pgm-1|Pgm2	phosphoglucomutase 1	protein-coding
981	chr16	24732853	24733754	+	7.84	8.78	4.23	4.55	2.25e-37	2.69e-35	0	NA	intron (NM_001145954	intron 2 of 7)	intron (NM_001145954	intron 2 of 7)	11448	NM_001145954	210126	Mm.209385	NM_178665	ENSMUSG00000033306	Lpp	9430020K16Rik|AA959454|AU024130|B130055L10Rik|C79715|D630048H16	LIM domain containing preferred translocation partner in lipoma	protein-coding
2554	chr10	86612167	86612925	+	7.36	8.3	3.75	4.55	5.75e-27	2.64e-25	0	NA	Intergenic	RMER15|LTR|ERVL	-72981	NR_015572	66263	Mm.392261	NR_015572	ENSMUSG00000097412	1810014B01Rik	-	RIKEN cDNA 1810014B01 gene	pseudo
3134	chr6	30107349	30107976	+	7.15	8.09	3.54	4.55	4.66e-25	1.74e-23	0	NA	intron (NM_001361695	intron 6 of 11)	intron (NM_001361695	intron 6 of 11)	20497	NM_001361694	18181	Mm.259258	NM_010938	ENSMUSG00000058440	Nrf1	C87038|D6Ertd415e	nuclear respiratory factor 1	protein-coding
7371	chr2	145808207	145808786	+	6.37	7.31	2.76	4.55	1.16e-17	1.84e-16	0	NA	intron (NM_028724	intron 2 of 12)	intron (NM_028724	intron 2 of 12)	22380	NM_028724	74030	Mm.228799	NM_028724	ENSMUSG00000001768	Rin2	2010003K16Rik|4632403N06Rik|AW821980|RASSF4	Ras and Rab interactor 2	protein-coding
7565	chr2	127850383	127850853	+	6.53	7.47	2.92	4.55	1.87e-17	2.89e-16	0	NA	Intergenic	Intergenic	-4010	NM_028765	74121	Mm.244835	NM_028765	ENSMUSG00000027380	Acoxl	1200014P05Rik|AV025673	acyl-Coenzyme A oxidase-like	protein-coding
8980	chr19	17143275	17143627	+	6.39	7.33	2.78	4.55	4.63e-16	6.05e-15	0	NA	intron (NM_181348	intron 9 of 19)	MTEa|LTR|ERVL-MaLR	187333	NM_181348	353211	Mm.257354	NM_181348	ENSMUSG00000039126	Prune2	6330414G02Rik|A230083H22Rik|A330102H22Rik|Bmcc1|mKIAA0367	prune homolog 2	protein-coding
12079	chr15	100341510	100342044	+	6.25	7.19	2.64	4.55	8.12e-14	7.88e-13	0	NA	Intergenic	Intergenic	6848	NM_001081471	668178	Mm.425943	NM_001081471	ENSMUSG00000058057	Mettl7a3	Gm10035|Ubie3	methyltransferase like 7A3	protein-coding
18291	chr1	90100477	90100877	+	5.56	6.5	1.95	4.55	6.66e-11	4.27e-10	0	NA	intron (NM_029122	intron 7 of 18)	intron (NM_029122	intron 7 of 18)	52724	NM_029122	74918	Mm.317517	NM_029122	ENSMUSG00000026301	Iqca	4930465P12Rik|4930585L22Rik|BB288505|Iqca1	IQ motif containing with AAA domain	protein-coding
23746	chr5	108143879	108144189	+	5.24	6.18	1.64	4.55	2.91e-09	1.44e-08	0	NA	intron (NM_028481	intron 5 of 28)	intron (NM_028481	intron 5 of 28)	11120	NM_028481	73254	Mm.441231	NM_028481	ENSMUSG00000056531	Ccdc18	1700021E15Rik|4932411G06Rik|NY-SAR-41	coiled-coil domain containing 18	protein-coding
42086	chr7	74109118	74109325	+	4.26	5.2	0.65	4.55	5.21e-06	1.45e-05	0	NA	Intergenic	Intergenic	-95539	NM_009181	20450	Mm.4954	NM_009181	ENSMUSG00000025789	St8sia2	AI323367|ST8SiaII|STX|Siat8b	ST8 alpha-N-acetyl-neuraminide alpha-2	8-sialyltransferase 2	protein-coding
29	chr11	49810674	49812580	+	9.42	10.36	5.82	4.54	7.89e-86	3.19e-82	0	NA	intron (NM_013529	intron 5 of 18)	intron (NM_013529	intron 5 of 18)	17472	NM_013529	14584	Mm.24402	NM_013529	ENSMUSG00000020363	Gfpt2	AI480523|GFAT2	glutamine fructose-6-phosphate transaminase 2	protein-coding
413	chr3	129997772	129998839	+	8.42	9.36	4.81	4.54	3.33e-47	9.45e-45	0	NA	intron (NM_207209	intron 11 of 23)	intron (NM_207209	intron 11 of 23)	-28099	NM_001293644	66815	Mm.31056	NM_025779	ENSMUSG00000027994	Mcub	9030408N13Rik|Ccdc109b	mitochondrial calcium uniporter dominant negative beta subunit	protein-coding
604	chr8	25010422	25011248	+	8.06	9	4.46	4.54	7.24e-43	1.4e-40	0	NA	intron (NM_001270996	intron 1 of 21)	MER20|DNA|hAT-Charlie	6087	NM_007404	11502	Mm.28908	NM_007404	ENSMUSG00000031555	Adam9	AU020942|MDC9|Mltng|mKIAA0021	a disintegrin and metallopeptidase domain 9 (meltrin gamma)	protein-coding
761	chr11	57719378	57720278	+	8.09	9.03	4.49	4.54	4.48e-40	6.89e-38	0	NA	intron (NM_134189	intron 1 of 11)	intron (NM_134189	intron 1 of 11)	-70334	NR_153850	78762	Mm.362149	NR_153850		4933424L21Rik	-	RIKEN cDNA 4933424L21 gene	ncRNA
1106	chr6	113024720	113025369	+	7.81	8.75	4.21	4.54	1.09e-35	1.16e-33	0	NA	Intergenic	MER103C|DNA|hAT-Charlie	-21258	NM_001355266	14911	Mm.781	NM_008188	ENSMUSG00000030264	Thumpd3	AW556087|Gt(ROSA)26asSor|Gtrosa26as	THUMP domain containing 3	protein-coding
1334	chr6	30307517	30308395	+	8.05	8.99	4.45	4.54	9.43e-34	8.29e-32	0	NA	Intergenic	Intergenic	-3417	NM_001169576	22214	Mm.332967	NM_009459	ENSMUSG00000039159	Ube2h	1500009C23Rik|AI181839|AI326965|AI462483|AW227540|E2-20K|Gid3|N28148|Ubc8	ubiquitin-conjugating enzyme E2H	protein-coding
1391	chr14	30973973	30974720	+	7.6	8.54	3.99	4.54	2.97e-33	2.5e-31	0	NA	exon (NM_011849	exon 8 of 15)	exon (NM_011849	exon 8 of 15)	22969	NM_001308328	23955	Mm.251494	NM_011849	ENSMUSG00000021918	Nek4	Stk2	NIMA (never in mitosis gene a)-related expressed kinase 4	protein-coding
2664	chr5	33002750	33003939	+	7.19	8.13	3.59	4.54	1.45e-26	6.38e-25	0	NA	Intergenic	Intergenic	-15472	NM_011738	22629	Mm.332314	NM_011738	ENSMUSG00000018965	Ywhah	-	tyrosine 3-monooxygenase/tryptophan 5-monooxygenase activation protein	eta polypeptide	protein-coding
2793	chr18	78483213	78484027	+	7.58	8.52	3.98	4.54	3.65e-26	1.53e-24	0	NA	intron (NM_207651	intron 2 of 21)	intron (NM_207651	intron 2 of 21)	113330	NM_030683	27411	Mm.44158	NM_030683	ENSMUSG00000024552	Slc14a2	UT-A1|UT-A3	solute carrier family 14 (urea transporter)	member 2	protein-coding
2934	chr9	49533383	49533945	+	7.28	8.22	3.68	4.54	1.01e-25	4.05e-24	0	NA	intron (NM_010875	intron 13 of 15)	intron (NM_010875	intron 13 of 15)	15376	NR_029465	100036537	Mm.437541	NR_029465	ENSMUSG00000079564	Gm11149	-	predicted gene 11149	ncRNA
3990	chr15	61244429	61245151	+	6.91	7.85	3.31	4.54	7.76e-23	2.28e-21	0	NA	Intergenic	RMER15|LTR|ERVL	-323520	NM_001081067	117586	Mm.291499	NM_001081067	ENSMUSG00000022347	A1bg	C44	alpha-1-B glycoprotein	protein-coding
5179	chr7	43409063	43409601	+	6.92	7.85	3.31	4.54	1.59e-20	3.6e-19	0	NA	exon (NM_172900	exon 4 of 12)	exon (NM_172900	exon 4 of 12)	1052	NM_172900	243958	Mm.24444	NM_172900	ENSMUSG00000030468	Siglecg	9830164H23|A630096C01Rik|Siglec-G|Siglec10|mSiglec-G	sialic acid binding Ig-like lectin G	protein-coding
7806	chr12	66734512	66735000	+	7.05	7.99	3.45	4.54	3.3e-17	4.96e-16	0	NA	intron (NM_001193266	intron 3 of 16)	intron (NM_001193266	intron 3 of 16)	-450355	NM_001162933	238217	Mm.188575	NM_001162933	ENSMUSG00000060499	Rpl10l	EG238217	ribosomal protein L10-like	protein-coding
8747	chr12	51988645	51988945	+	6.18	7.12	2.58	4.54	2.83e-16	3.79e-15	0	NA	3' UTR (NM_001347404	exon 4 of 4)	3' UTR (NM_001347404	exon 4 of 4)	-17474	NM_177171	320487	Mm.131941	NM_177171	ENSMUSG00000035181	Heatr5a	C230081H03Rik|D930036F22Rik|mKIAA1316	HEAT repeat containing 5A	protein-coding
9909	chr5	74896875	74897922	+	8.76	9.7	5.16	4.54	2.83e-15	3.35e-14	0	NA	Intergenic	Intergenic	-51796	NR_045866	619945	Mm.359372	NM_001037908	ENSMUSG00000072874	Gm6116	EG619945	predicted gene 6116	ncRNA
10924	chr1	121241629	121242089	+	5.97	6.91	2.37	4.54	1.4e-14	1.5e-13	0	NA	Intergenic	Intergenic	85819	NM_001271531	72999	Mm.27136	NM_133748	ENSMUSG00000003721	Insig2	2900053I11Rik|C730043J18Rik|Insig-2	insulin induced gene 2	protein-coding
15867	chr10	3466238	3466595	+	5.75	6.69	2.15	4.54	7.28e-12	5.38e-11	0	NA	Intergenic	L1MA6|LINE|L1	-73863	NM_027391	70337	Mm.24153	NM_027391	ENSMUSG00000019762	Iyd	0610009A07Rik|AI265638|Dehal1	iodotyrosine deiodinase	protein-coding
16375	chr14	75369909	75370198	+	5.57	6.51	1.98	4.54	1.21e-11	8.69e-11	0	NA	intron (NR_030568	intron 2 of 3)	intron (NR_030568	intron 2 of 3)	18093	NR_030568	100124475		NR_030568	ENSMUSG00000077981	Mir466f-3	Mirn466f-3	microRNA 466f-3	ncRNA
21427	chr1	161365069	161365556	+	5.3	6.24	1.69	4.54	6.86e-10	3.75e-09	0	NA	Intergenic	Intergenic	-30126	NM_009452	22164	Mm.4994	NM_009452	ENSMUSG00000026700	Tnfsf4	Ath-1|Ath1|CD134L|OX-40L|Ox40l|TXGP1|Tnlg2b|Txgp1l|gp34	tumor necrosis factor (ligand) superfamily	member 4	protein-coding
31744	chrX	169089874	169090164	+	4.82	5.76	1.23	4.54	1.51e-07	5.56e-07	0	NA	intron (NR_109847	intron 1 of 14)	intron (NR_109847	intron 1 of 14)	-22859	NM_001287530	11856	Mm.441810	NM_009707	ENSMUSG00000031355	Arhgap6	AI504284|RhoGAPX-1	Rho GTPase activating protein 6	protein-coding
62318	chr9	95578511	95578908	+	5.93	6.87	2.33	4.54	0.000469	0.000882	0.000882	NA	Intergenic	Intergenic	18892	NM_198414	75552	Mm.151485	NM_198414	ENSMUSG00000064225	Paqr9	1700020G04Rik	progestin and adipoQ receptor family member IX	protein-coding
72087	chr14	51870703	51871105	+	6.4	7.34	2.8	4.54	0.00255	0.00414	0.00414	NA	Intergenic	Tigger7|DNA|TcMar-Tigger	-13938	NM_001029990	52535	Mm.5750	NM_001029990	ENSMUSG00000004561	Mettl17	2310032K15Rik|D14Ertd209e|Mett11d1	methyltransferase like 17	protein-coding
778	chr1	162225323	162226333	+	7.95	8.89	4.36	4.53	7.53e-40	1.14e-37	0	NA	TTS (NR_002870)	TTS (NR_002870)	2460	NR_029796	387210		NR_029796	ENSMUSG00000065516	Mir214	Mirn214|mir-214|mmu-mir-214	microRNA 214	ncRNA
1147	chr7	98415349	98416295	+	7.93	8.87	4.34	4.53	2.74e-35	2.8e-33	0	NA	Intergenic	Intergenic	-24594	NM_001130693	14918	Mm.389928	NM_001034890	ENSMUSG00000074003	Gucy2d	-	guanylate cyclase 2d	protein-coding
1153	chr17	84510157	84510813	+	7.77	8.71	4.17	4.53	3.12e-35	3.18e-33	0	NA	Intergenic	Intergenic	-1410	NM_001357986	213556	Mm.215159	NM_177606	ENSMUSG00000040852	Plekhh2	AI256725|E030001K05|mKIAA2028	pleckstrin homology domain containing	family H (with MyTH4 domain) member 2	protein-coding
1213	chr18	77948471	77949313	+	7.68	8.62	4.1	4.53	8.63e-35	8.34e-33	0	NA	exon (NM_001195633	exon 2 of 44)	exon (NM_001195633	exon 2 of 44)	10425	NM_001195633	100502841	Mm.297782	NM_001195633	ENSMUSG00000039840	Epg5	4732475F16|5430411K18Rik|AI661957|AW456499|mKIAA1632	ectopic P-granules autophagy protein 5 homolog (C. elegans)	protein-coding
1417	chrX	95963186	95963789	+	7.62	8.56	4.02	4.53	4.75e-33	3.93e-31	0	NA	Intergenic	RMER15|LTR|ERVL	-6513	NM_152822	76130	Mm.274318	NM_152822	ENSMUSG00000057421	Las1l	1810030A06Rik|5830482G23Rik	LAS1-like (S. cerevisiae)	protein-coding
1665	chr12	31056031	31056959	+	7.86	8.8	4.26	4.53	2.44e-31	1.72e-29	0	NA	Intergenic	RLTR19|LTR|ERVK	-17473	NM_027828	104943	Mm.248938	NM_027828	ENSMUSG00000036136	Fam110c	9030611O19Rik|AU019489	family with sequence similarity 110	member C	protein-coding
2018	chr4	95001324	95002034	+	7.35	8.29	3.76	4.53	2.76e-29	1.61e-27	0	NA	Intergenic	Intergenic	-22579	NM_177239	320713	Mm.208868	NM_177239	ENSMUSG00000062627	Mysm1	C130067A03Rik|C530050H10Rik	myb-like	SWIRM and MPN domains 1	protein-coding
2024	chr8	31372935	31373753	+	7.87	8.81	4.28	4.53	3.02e-29	1.75e-27	0	NA	intron (NR_046272	intron 1 of 3)	intron (NR_046272	intron 1 of 3)	5595	NR_046272	74517	Mm.390001	NR_046272	ENSMUSG00000109915	7420700N18Rik	-	RIKEN cDNA 7420700N18 gene	ncRNA
3465	chr12	70349784	70350785	+	7.46	8.4	3.87	4.53	4.02e-24	1.36e-22	0	NA	intron (NR_037248	intron 2 of 4)	ORR1B2|LTR|ERVL-MaLR	-2670	NM_001110203	94090	Mm.184012	NM_053167	ENSMUSG00000021071	Trim9	-	tripartite motif-containing 9	protein-coding
4736	chr1	177719048	177719599	+	6.73	7.67	3.14	4.53	2.52e-21	6.25e-20	0	NA	Intergenic	Intergenic	-10491	NM_027077	69428	Mm.84467	NM_027077	ENSMUSG00000015962	1700016C15Rik	-	RIKEN cDNA 1700016C15 gene	protein-coding
5852	chr2	104146020	104146394	+	6.6	7.54	3.01	4.53	1.49e-19	2.98e-18	0	NA	3' UTR (NM_001033347	exon 21 of 21)	3' UTR (NM_001033347	exon 21 of 21)	23438	NM_026634	68243	Mm.158191	NM_026634	ENSMUSG00000032671	A930018P22Rik	-	RIKEN cDNA A930018P22 gene	protein-coding
6055	chr9	123000464	123000825	+	6.58	7.52	2.99	4.53	2.67e-19	5.17e-18	0	NA	intron (NM_010620	intron 22 of 34)	intron (NM_010620	intron 22 of 34)	-20682	NM_025339	66079	Mm.482265	NM_025339	ENSMUSG00000066233	Tmem42	0610027O18Rik|4933429E06Rik|AV003444|D9Ertd662e	transmembrane protein 42	protein-coding
7225	chr2	151003585	151004949	+	9.39	10.33	5.81	4.53	8.09e-18	1.31e-16	0	NA	intron (NM_207204	intron 1 of 23)	intron (NM_207204	intron 1 of 23)	5131	NM_207204	78177	Mm.120911	NM_207204	ENSMUSG00000068115	Ninl	4930519N13Rik|Gm1004|Gm1634|mKIAA0980	ninein-like	protein-coding
22988	chr1	30898655	30898989	+	5.23	6.17	1.64	4.53	1.86e-09	9.48e-09	0	NA	Intergenic	LTRIS2|LTR|ERV1	-35566	NM_001081080	213109	Mm.194486	NM_025871	ENSMUSG00000048874	Phf3	2310061N19Rik	PHD finger protein 3	protein-coding
24277	chr7	119988169	119988443	+	5.07	6.01	1.48	4.53	3.98e-09	1.92e-08	0	NA	Intergenic	L1M6|LINE|L1	88195	NR_126475	73919	Mm.46381	NM_029610	ENSMUSG00000030922	Lyrm1	1110065L10Rik|2310004B22Rik|4930404J24Rik	LYR motif containing 1	protein-coding
31630	chr7	79988571	79988913	+	4.82	5.76	1.23	4.53	1.44e-07	5.35e-07	0	NA	Intergenic	B2_Mm1t|SINE|B2	-36072	NM_001145999	209225	Mm.290925	NM_175433	ENSMUSG00000048897	Zfp710	5430400N05Rik|9830165K13|AI324798|Znf710	zinc finger protein 710	protein-coding
178	chr7	134287533	134288582	+	8.87	9.81	5.29	4.52	3.2e-58	2.11e-55	0	NA	intron (NM_001081331	intron 5 of 7)	intron (NM_001081331	intron 5 of 7)	-62960	NM_007400	11489	Mm.439714	NM_007400	ENSMUSG00000054555	Adam12	Mltna	a disintegrin and metallopeptidase domain 12 (meltrin alpha)	protein-coding
237	chr11	86646234	86647049	+	8.53	9.47	4.95	4.52	4.75e-55	2.35e-52	0	NA	intron (NM_001356531	intron 5 of 11)	ID_B1|SINE|B4	24634	NM_001356531	75909	Mm.390398	NM_029478	ENSMUSG00000018171	Vmp1	3110098I04Rik|4930579A11Rik|AI787464|Tango5|Tmem49|mir-21a|ni-2	vacuole membrane protein 1	protein-coding
315	chr7	112453540	112454656	+	8.58	9.52	5	4.52	8.82e-51	3.28e-48	0	NA	intron (NM_020606	intron 1 of 12)	intron (NM_020606	intron 1 of 12)	26392	NM_020606	57342	Mm.143763	NM_020606	ENSMUSG00000030770	Parva	2010012A22Rik|5430400F08Rik|AI225929|AU042898|Actp|CH-ILKBP|Parvin	parvin	alpha	protein-coding
479	chr5	72249648	72250719	+	8.43	9.36	4.85	4.52	1.02e-45	2.49e-43	0	NA	intron (NR_003966	intron 9 of 22)	intron (NR_003966	intron 9 of 22)	46840	NM_153389	231287	Mm.32775	NM_153389	ENSMUSG00000046808	Atp10d	9830145H18Rik|ATPVD|D5Buc24e	ATPase	class V	type 10D	protein-coding
997	chr19	17270972	17271686	+	7.83	8.77	4.25	4.52	5.07e-37	5.96e-35	0	NA	Intergenic	Intergenic	68176	NM_001136484	14537	Mm.244825	NM_010265	ENSMUSG00000038843	Gcnt1	5630400D21Rik|B130048E03|C2 GlcNAcT|C2GNT|IGnT	glucosaminyl (N-acetyl) transferase 1	core 2	protein-coding
1462	chr14	67940952	67941837	+	7.71	8.65	4.14	4.52	1e-32	8.04e-31	0	NA	Intergenic	Intergenic	-7822	NM_177780	68813	Mm.258155	NM_177780	ENSMUSG00000044447	Dock5	1110060D06Rik|AI666732|AI956923|BC016533|E130320D18|lr2|rlc	dedicator of cytokinesis 5	protein-coding
2280	chr5	91282843	91283425	+	7.38	8.32	3.79	4.52	4.73e-28	2.43e-26	0	NA	promoter-TSS (NR_040428)	promoter-TSS (NR_040428)	-58	NR_040428	100503265	Mm.125059	NR_040428	ENSMUSG00000107198	Gm19619	-	predicted gene	19619	ncRNA
2465	chr3	56962548	56963063	+	7.25	8.19	3.67	4.52	2.52e-27	1.2e-25	0	NA	Intergenic	Intergenic	339183	NM_008536	17112	Mm.856	NM_008536	ENSMUSG00000027800	Tm4sf1	L6|M3s1	transmembrane 4 superfamily member 1	protein-coding
2817	chr7	134127792	134128707	+	7.52	8.46	3.93	4.52	4.17e-26	1.74e-24	0	NA	intron (NM_007400	intron 3 of 22)	intron (NM_007400	intron 3 of 22)	96848	NM_007400	11489	Mm.439714	NM_007400	ENSMUSG00000054555	Adam12	Mltna	a disintegrin and metallopeptidase domain 12 (meltrin alpha)	protein-coding
3791	chr9	57291862	57292744	+	6.95	7.89	3.37	4.52	2.47e-23	7.63e-22	0	NA	Intergenic	RLTR48A|LTR|ERV1	-29704	NM_028820	74211	Mm.428905	NM_028820	ENSMUSG00000032300	1700017B05Rik	AA682102|D9Ertd278e	RIKEN cDNA 1700017B05 gene	protein-coding
4656	chr2	117882089	117882667	+	7.23	8.17	3.65	4.52	1.83e-21	4.61e-20	0	NA	intron (NR_040631	intron 3 of 5)	L1ME2z|LINE|L1	60450	NR_040631	73938	Mm.399107	NR_040631	ENSMUSG00000086221	4930412B13Rik	-	RIKEN cDNA 4930412B13 gene	ncRNA
13894	chr16	34671878	34672263	+	5.97	6.91	2.38	4.52	8.67e-13	7.32e-12	0	NA	intron (NM_030744	intron 4 of 5)	intron (NM_030744	intron 4 of 5)	-18546	NM_172824	239839	Mm.272045	NM_172824	ENSMUSG00000022833	Ccdc14	G630039H03Rik	coiled-coil domain containing 14	protein-coding
16242	chr12	57339127	57339486	+	5.79	6.73	2.22	4.52	1.07e-11	7.73e-11	0	NA	intron (NM_001164370	intron 7 of 9)	Lx4B|LINE|L1	108881	NM_001164370	73490	Mm.268180	NM_001164370	ENSMUSG00000047022	Mipol1	1700081O04Rik|6030439O22Rik|AU021838|AW536152|D12Ertd19e	mirror-image polydactyly 1	protein-coding
21449	chr18	49883842	49884282	+	5.25	6.18	1.66	4.52	6.94e-10	3.79e-09	0	NA	intron (NM_001081371	intron 19 of 42)	MTA_Mm|LTR|ERVL-MaLR	51065	NM_001081371	240283	Mm.257790	NM_001081371	ENSMUSG00000037416	Dmxl1	C630007L23Rik|D030030C22	Dmx-like 1	protein-coding
27296	chrX	77236765	77237019	+	5.09	6.03	1.51	4.52	2.01e-08	8.63e-08	0	NA	Intergenic	Intergenic	-274335	NM_020601	21372	Mm.258476	NM_020601	ENSMUSG00000025246	Tbl1x	5330429M20|Tbl1	transducin (beta)-like 1 X-linked	protein-coding
811	chr1	64714997	64715937	+	7.9	8.83	4.32	4.51	1.64e-39	2.37e-37	0	NA	intron (NM_001097644	intron 7 of 9)	intron (NM_001097644	intron 7 of 9)	22283	NM_022721	14367	Mm.150813	NM_022721	ENSMUSG00000045005	Fzd5	5330434N09Rik|AI427138|Fz-5|Fz5|mFz5	frizzled class receptor 5	protein-coding
999	chr19	38973538	38974202	+	7.85	8.79	4.28	4.51	5.77e-37	6.77e-35	0	NA	Intergenic	Intergenic	-33149	NM_028089	72082	Mm.142581	NM_028089	ENSMUSG00000025002	Cyp2c55	2010318C06Rik	cytochrome P450	family 2	subfamily c	polypeptide 55	protein-coding
1008	chr17	79694894	79696119	+	8.18	9.12	4.61	4.51	7.39e-37	8.59e-35	0	NA	Intergenic	Intergenic	19535	NM_009994	13078	Mm.214016	NM_009994	ENSMUSG00000024087	Cyp1b1	CP1B|P4501b1	cytochrome P450	family 1	subfamily b	polypeptide 1	protein-coding
1952	chr12	119019442	119020414	+	7.38	8.32	3.81	4.51	1.14e-29	6.85e-28	0	NA	Intergenic	Intergenic	-53507	NM_029961	77706	Mm.261496	NM_029961	ENSMUSG00000072791	Abcb5	9230106F14Rik	ATP-binding cassette	sub-family B (MDR/TAP)	member 5	protein-coding
2555	chr2	65285239	65285942	+	7.53	8.46	3.95	4.51	5.77e-27	2.65e-25	0	NA	Intergenic	Intergenic	-46964	NM_027225	319876	Mm.34159	NM_027225	ENSMUSG00000034903	Cobll1	1810047P18Rik|Coblr1|D430044D16Rik	Cobl-like 1	protein-coding
2913	chr5	42167979	42168574	+	7.19	8.13	3.62	4.51	8.87e-26	3.57e-24	0	NA	intron (NR_131130	intron 1 of 2)	intron (NR_131130	intron 1 of 2)	100316	NR_131130	433882	Mm.319353	NR_131130	ENSMUSG00000067285	Gm16223	EG433882	predicted gene 16223	ncRNA
5782	chr1	166968227	166968723	+	6.57	7.51	2.99	4.51	1.21e-19	2.45e-18	0	NA	Intergenic	MLT1H2|LTR|ERVL-MaLR	31255	NR_037988	100503962	Mm.216842	NR_037988	ENSMUSG00000102548	Gm16701	-	predicted gene	16701	ncRNA
6889	chr6	38829395	38829839	+	6.98	7.92	3.4	4.51	3.14e-18	5.34e-17	0	NA	intron (NM_010433	intron 1 of 14)	intron (NM_010433	intron 1 of 14)	7694	NM_001136065	15258	Mm.23790	NM_010433	ENSMUSG00000061436	Hipk2	1110014O20Rik|B230339E18Rik|Stank	homeodomain interacting protein kinase 2	protein-coding
7332	chr2	84549690	84550186	+	6.67	7.61	3.1	4.51	1.07e-17	1.71e-16	0	NA	Intergenic	L2c|LINE|L2	-43065	NR_046046	672763	Mm.491046	NR_046046	ENSMUSG00000087362	Gm13710	-	predicted gene 13710	ncRNA
8008	chr4	139422443	139422843	+	6.34	7.28	2.78	4.51	5.43e-17	7.95e-16	0	NA	intron (NM_001160319	intron 39 of 105)	intron (NM_001160319	intron 39 of 105)	41984	NM_001160319	69116	Mm.271956	NM_001160319	ENSMUSG00000066036	Ubr4	1810009A16Rik|A930005E13Rik|D930005K06Rik|Gm1032|Gm1666|N28143|RBAF600|Zubr1|mKIAA0462|p600	ubiquitin protein ligase E3 component n-recognin 4	protein-coding
8413	chr7	82405402	82405944	+	6.26	7.2	2.69	4.51	1.42e-16	1.98e-15	0	NA	intron (NM_001190374	intron 3 of 29)	intron (NM_001190374	intron 3 of 29)	69979	NM_001190374	269959	Mm.65306	NM_001190374	ENSMUSG00000070469	Adamtsl3	9230119C12Rik|C130057K09|mKIAA1233	ADAMTS-like 3	protein-coding
28341	chr12	16779057	16779437	+	4.84	5.77	1.26	4.51	3.3e-08	1.36e-07	0	NA	intron (NM_015764	intron 1 of 34)	intron (NM_015764	intron 1 of 34)	21639	NM_015764	268527	Mm.428062	NM_015764	ENSMUSG00000036523	Greb1	5730583K22Rik|9130004E13|AF180470|AU023194|mKIAA0575	gene regulated by estrogen in breast cancer protein	protein-coding
43065	chr10	93597375	93597606	+	4.28	5.21	0.71	4.51	6.84e-06	1.86e-05	0	NA	intron (NR_045810	intron 2 of 3)	L2|LINE|L2	-7832	NM_027246	69878	Mm.259642	NM_027246	ENSMUSG00000020018	Snrpf	2010013O18Rik|SMF|sm-F|snRNP-F	small nuclear ribonucleoprotein polypeptide F	protein-coding
60208	chrX	71853731	71854104	+	5.9	6.84	2.33	4.51	0.000318	0.000619	0.000619	NA	Intergenic	Intergenic	37159	NM_001081356	67048	Mm.41102	NM_001081356	ENSMUSG00000073131	Vma21	2610030H06Rik|AI840175	VMA21 vacuolar H+-ATPase homolog (S. cerevisiae)	protein-coding
672	chr2	166237353	166238396	+	8.43	9.37	4.87	4.5	1.41e-41	2.46e-39	0	NA	Intergenic	Intergenic	-36034	NR_033467	670775	Mm.384326	NR_033467	ENSMUSG00000084840	Gm11468	-	predicted gene 11468	ncRNA
1983	chr11	33882376	33883337	+	7.85	8.79	4.3	4.5	1.77e-29	1.05e-27	0	NA	intron (NM_001190886	intron 1 of 7)	intron (NM_001190886	intron 1 of 7)	-39271	NM_001290690	70357	Mm.252514	NM_027398	ENSMUSG00000053519	Kcnip1	KCHIP1|Kchip1.2	Kv channel-interacting protein 1	protein-coding
3645	chr1	71763416	71764004	+	7.22	8.15	3.65	4.5	1.08e-23	3.46e-22	0	NA	Intergenic	Intergenic	110375	NR_040308	100042814	Mm.405775	NR_040308	ENSMUSG00000073652	Apol7d	Gm15456	apolipoprotein L 7d	ncRNA
4974	chr13	59850352	59850806	+	6.7	7.64	3.14	4.5	6.85e-21	1.61e-19	0	NA	Intergenic	Intergenic	-27432	NM_153538	214290	Mm.233082	NM_153538	ENSMUSG00000035248	Zcchc6	6030448M23Rik|AA420405	zinc finger	CCHC domain containing 6	protein-coding
5421	chr3	121320971	121321432	+	6.75	7.69	3.19	4.5	3.79e-20	8.2e-19	0	NA	intron (NR_155539	intron 2 of 2)	intron (NR_155539	intron 2 of 2)	29461	NR_155539	66789	Mm.269881	NM_024178	ENSMUSG00000039887	Alg14	5430428G01Rik|AI854024	asparagine-linked glycosylation 14	protein-coding
8029	chr7	123082154	123082611	+	6.32	7.26	2.76	4.5	5.81e-17	8.49e-16	0	NA	Intergenic	Intergenic	-41503	NM_144925	233833	Mm.102305	NM_144925	ENSMUSG00000052707	Tnrc6a	2010321I05Rik|3110054G10Rik|AW557223|CAGH26|D130023A07Rik|GW182|Tnrc6	trinucleotide repeat containing 6a	protein-coding
8690	chr10	34102148	34102857	+	6.51	7.45	2.95	4.5	2.55e-16	3.44e-15	0	NA	intron (NM_001162937	intron 5 of 6)	intron (NM_001162937	intron 5 of 6)	-5983	NM_178908	103511	Mm.66334	NM_178908	ENSMUSG00000049872	Fam26e	BB146404|Calhm5	family with sequence similarity 26	member E	protein-coding
9560	chr15	81070539	81070840	+	6.29	7.23	2.74	4.5	1.44e-15	1.77e-14	0	NA	intron (NM_001082536	intron 2 of 13)	intron (NM_001082536	intron 2 of 13)	34358	NM_153049	223701	Mm.439814	NM_153049	ENSMUSG00000042292	Mkl1	AMKL|Bsac|Mal|Mrtf-A	MKL (megakaryoblastic leukemia)/myocardin-like 1	protein-coding
16881	chr12	88451043	88451387	+	5.59	6.53	2.02	4.5	1.94e-11	1.35e-10	0	NA	intron (NM_001361598	intron 6 of 9)	intron (NM_001361598	intron 6 of 9)	-73892	NR_045888	71818	Mm.490789	NR_045888	ENSMUSG00000113434	3200001D21Rik	-	RIKEN cDNA 3200001D21 gene	ncRNA
22871	chr11	44216381	44216689	+	5.23	6.16	1.66	4.5	1.75e-09	8.96e-09	0	NA	Intergenic	Intergenic	-183528	NM_001303244	16160	Mm.239707	NM_008352	ENSMUSG00000004296	Il12b	Il-12b|Il-12p40|Il12p40|p40	interleukin 12b	protein-coding
25806	chr11	83310940	83311293	+	5.02	5.96	1.46	4.5	9.2e-09	4.18e-08	0	NA	intron (NM_027915	intron 2 of 20)	MTA_Mm|LTR|ERVL-MaLR	8419	NM_027915	71770	Mm.39053	NM_027915	ENSMUSG00000035152	Ap2b1	1300012O03Rik|AI788979|AP105B	adaptor-related protein complex 2	beta 1 subunit	protein-coding
35621	chr19	50716920	50717186	+	4.53	5.47	0.97	4.5	6.81e-07	2.24e-06	0	NA	Intergenic	Intergenic	-38407	NM_001252501	58178	Mm.313672	NM_021377	ENSMUSG00000043531	Sorcs1	Sorcs|mSorCS	sortilin-related VPS10 domain containing receptor 1	protein-coding
35688	chr6	21747638	21747843	+	4.59	5.53	1.03	4.5	6.98e-07	2.29e-06	0	NA	Intergenic	Intergenic	104775	NM_173007	269831	Mm.21950	NM_173007	ENSMUSG00000029669	Tspan12	9030619E17|AI426782|AI663988|AW111457|Tm4sf12	tetraspanin 12	protein-coding
42931	chr4	56250713	56250926	+	4.21	5.15	0.65	4.5	6.54e-06	1.79e-05	0	NA	Intergenic	Intergenic	490606	NM_025271	11471	Mm.251434	NM_025271	ENSMUSG00000070980	Actl7b	Gm26657|Tact1	actin-like 7b	protein-coding
51	chr19	30124745	30126048	+	8.97	9.91	5.42	4.49	2.88e-76	6.61e-73	0	NA	intron (NM_138595	intron 15 of 24)	intron (NM_138595	intron 15 of 24)	50045	NM_138595	104174	Mm.274852	NM_138595	ENSMUSG00000024827	Gldc	D030049L12Rik|D19Wsu57e|b2b2679Clo	glycine decarboxylase	protein-coding
287	chr5	92198196	92198842	+	8.41	9.35	4.85	4.49	3.59e-52	1.47e-49	0	NA	intron (NM_019490	intron 21 of 23)	intron (NM_019490	intron 21 of 23)	16889	NR_033483	57425	Mm.2548	NM_020562	ENSMUSG00000029409	U90926	-	cDNA sequence U90926	ncRNA
842	chr15	66861217	66862343	+	8.3	9.23	4.74	4.49	3.82e-39	5.32e-37	0	NA	Intergenic	Intergenic	-29613	NM_018865	22402	Mm.10222	NM_018865	ENSMUSG00000005124	Wisp1	AW146261|CCN4|Elm1	WNT1 inducible signaling pathway protein 1	protein-coding
1427	chr7	141371816	141372605	+	7.58	8.52	4.03	4.49	5.93e-33	4.88e-31	0	NA	Intergenic	Intergenic	-7100	NR_033532	320871	Mm.475463	NM_177280	ENSMUSG00000086844	B230206H07Rik	-	RIKEN cDNA B230206H07 gene	ncRNA
2109	chr13	13605973	13606643	+	7.36	8.3	3.81	4.49	6.95e-29	3.86e-27	0	NA	intron (NM_010748	intron 1 of 52)	ORR1F-int|LTR|ERVL-MaLR	15899	NM_010748	17101	Mm.342337	NM_010748	ENSMUSG00000019726	Lyst	D13Sfk13|beige|bg	lysosomal trafficking regulator	protein-coding
2332	chr9	114502525	114503353	+	7.28	8.22	3.72	4.49	7.25e-28	3.64e-26	0	NA	Intergenic	RMER15|LTR|ERVL	-6395	NM_009916	12773	Mm.1337	NM_009916	ENSMUSG00000047898	Ccr4	C-C CKR-4|CHEMR1|Cmkbr4|LESTR|Sdf1r	chemokine (C-C motif) receptor 4	protein-coding
3140	chr2	140104910	140106035	+	7.21	8.15	3.66	4.49	4.93e-25	1.84e-23	0	NA	Intergenic	Intergenic	-38667	NM_001289611	75812	Mm.293449	NM_175225	ENSMUSG00000039033	Tasp1	4930485D02Rik|AW986064	taspase	threonine aspartase 1	protein-coding
3347	chr9	23304319	23304917	+	7.08	8.01	3.52	4.49	1.67e-24	5.85e-23	0	NA	intron (NM_028472	intron 6 of 14)	L3b|LINE|CR1	81542	NM_028472	73230	Mm.335020	NM_028472	ENSMUSG00000031963	Bmper	3110056H04Rik|CV-2|Crim3|Cv2	BMP-binding endothelial regulator	protein-coding
3369	chr4	108905771	108906423	+	7.12	8.06	3.57	4.49	1.89e-24	6.58e-23	0	NA	intron (NM_023537	intron 2 of 4)	intron (NM_023537	intron 2 of 4)	27027	NM_023537	69908	Mm.41580	NM_023537	ENSMUSG00000003411	Rab3b	2610528C18Rik	RAB3B	member RAS oncogene family	protein-coding
4141	chr2	172661274	172662004	+	6.86	7.8	3.31	4.49	1.85e-22	5.25e-21	0	NA	Intergenic	Intergenic	110648	NM_001159696	21420	Mm.3629	NM_009335	ENSMUSG00000028640	Tfap2c	AA409384|AP2gamma|Ap-2.2|Stra2|Tcfap2c	transcription factor AP-2	gamma	protein-coding
10674	chr9	107833894	107834177	+	6.02	6.96	2.47	4.49	9.42e-15	1.03e-13	0	NA	intron (NM_029169	intron 5 of 20)	intron (NM_029169	intron 5 of 20)	38784	NM_029169	19654	Mm.139926	NM_011251	ENSMUSG00000032582	Rbm6	4930506F14Rik|Def-3|NY-LU-12|g16|mKIAA4015	RNA binding motif protein 6	protein-coding
13521	chr2	157443307	157443705	+	5.83	6.77	2.27	4.49	5.43e-13	4.71e-12	0	NA	intron (NM_001025395	intron 2 of 13)	MTE2b|LTR|ERVL-MaLR	19213	NM_001025395	20779	Mm.22845	NM_009271	ENSMUSG00000027646	Src	AW259666|pp60c-src	Rous sarcoma oncogene	protein-coding
14826	chr14	72633960	72634516	+	5.8	6.74	2.25	4.49	2.42e-12	1.91e-11	0	NA	intron (NM_207636	intron 3 of 25)	intron (NM_207636	intron 3 of 25)	75765	NM_207636	319448	Mm.205421	NM_207636	ENSMUSG00000033487	Fndc3a	1700094E19Rik|D14Ertd453e|F730017H24Rik|Fndc3|sys	fibronectin type III domain containing 3A	protein-coding
21665	chrX	160446097	160446428	+	5.22	6.16	1.66	4.49	7.98e-10	4.32e-09	0	NA	intron (NM_001079848	intron 3 of 25)	MIRc|SINE|MIR	55572	NM_001290445	237175	Mm.213016	NM_178712	ENSMUSG00000031298	Adgrg2	AW212196|B830041D06Rik|Gpr64|Me6	adhesion G protein-coupled receptor G2	protein-coding
21894	chr6	17403051	17403403	+	5.36	6.29	1.8	4.49	9.38e-10	5.02e-09	0	NA	Intergenic	Intergenic	-60730	NM_008591	17295	Mm.86844	NM_008591	ENSMUSG00000009376	Met	AI838057|HGF|HGFR|Par4|c-Met	met proto-oncogene	protein-coding
21895	chrX	160148739	160149124	+	5.39	6.33	1.84	4.49	9.38e-10	5.02e-09	0	NA	Intergenic	Intergenic	-10501	NM_008810	18597	Mm.34775	NM_008810	ENSMUSG00000031299	Pdha1	Pdha-1	pyruvate dehydrogenase E1 alpha 1	protein-coding
23484	chr4	105569666	105570115	+	5.28	6.21	1.72	4.49	2.51e-09	1.25e-08	0	NA	Intergenic	Intergenic	412543	NM_080555	67916	Mm.348326	NM_080555	ENSMUSG00000028517	Plpp3	1110003O22Rik|2610002D05Rik|AV025606|D4Bwg0538e|D4Bwg1535e|Lpp3|Ppab2b|Ppap2b	phospholipid phosphatase 3	protein-coding
25076	chr10	5203897	5204261	+	5.03	5.97	1.48	4.49	6.22e-09	2.9e-08	0	NA	exon (NM_001347732	exon 89 of 146)	exon (NM_001347732	exon 89 of 146)	-9372	NM_001079686	64009	Mm.331626	NM_022027	ENSMUSG00000096054	Syne1	8B|A330049M09Rik|BE692247|C130039F11Rik|CPG2|KASH1|Myne1|mKIAA1756|myne-1	spectrin repeat containing	nuclear envelope 1	protein-coding
25811	chr6	88869232	88869997	+	7.72	8.66	4.17	4.49	9.21e-09	4.18e-08	0	NA	intron (NM_001347327	intron 1 of 7)	intron (NM_001347327	intron 1 of 7)	4430	NM_176973	319655	Mm.302613	NM_176973	ENSMUSG00000033152	Podxl2	D130074J02Rik|PODLX2	podocalyxin-like 2	protein-coding
29310	chr5	53801477	53801716	+	4.86	5.79	1.3	4.49	5.24e-08	2.1e-07	0	NA	Intergenic	Intergenic	-8031	NM_144517	67249	Mm.28823	NM_144517	ENSMUSG00000039178	Tbc1d19	2810453K03Rik	TBC1 domain family	member 19	protein-coding
43249	chr5	117128316	117128535	+	4.2	5.14	0.65	4.49	7.19e-06	1.95e-05	0	NA	intron (NM_001199685	intron 1 of 20)	intron (NM_001199685	intron 1 of 20)	-5163	NM_183306	330177	Mm.24343	NM_183306	ENSMUSG00000061288	Taok3	2900006A08Rik|A130052D22|A430105I05Rik	TAO kinase 3	protein-coding
72281	chr10	85486463	85486958	+	6.5	7.44	2.95	4.49	0.00263	0.00426	0.00426	NA	intron (NM_028709	intron 1 of 16)	intron (NM_028709	intron 1 of 16)	99896	NM_028709	74007	Mm.36544	NM_028709	ENSMUSG00000020042	Btbd11	6330404E16Rik	BTB (POZ) domain containing 11	protein-coding
749	chr13	91205997	91206767	+	7.99	8.93	4.45	4.48	3.4e-40	5.32e-38	0	NA	intron (NM_025770	intron 2 of 7)	intron (NM_025770	intron 2 of 7)	17605	NM_025770	66795	Mm.235385	NM_025770	ENSMUSG00000021619	Atg10	5330424L23Rik|5430428K15Rik|AI852123|APG10|Agp10|Apg10l|Apg10p|Atg10l	autophagy related 10	protein-coding
787	chr2	118287511	118288265	+	8.11	9.04	4.57	4.48	8.99e-40	1.34e-37	0	NA	intron (NM_201367	intron 1 of 2)	intron (NM_201367	intron 1 of 2)	-17026	NR_045919	73358	Mm.437192	NR_045919	ENSMUSG00000085889	1700054M17Rik	-	RIKEN cDNA 1700054M17 gene	ncRNA
1355	chr6	94405145	94405931	+	7.64	8.58	4.1	4.48	1.48e-33	1.28e-31	0	NA	Intergenic	Intergenic	-94776	NM_026255	67582	Mm.280725	NM_026255	ENSMUSG00000045100	Slc25a26	4930433D19Rik|4933433F13Rik|AW557176|D6Bwg0781e|Slc25a6	solute carrier family 25 (mitochondrial carrier	phosphate carrier)	member 26	protein-coding
2691	chr12	31059255	31059968	+	7.23	8.17	3.69	4.48	1.83e-26	7.97e-25	0	NA	Intergenic	Intergenic	-14357	NM_027828	104943	Mm.248938	NM_027828	ENSMUSG00000036136	Fam110c	9030611O19Rik|AU019489	family with sequence similarity 110	member C	protein-coding
3715	chr19	50652401	50653247	+	7.01	7.95	3.47	4.48	1.76e-23	5.56e-22	0	NA	intron (NM_001360457	intron 1 of 26)	intron (NM_001360457	intron 1 of 26)	25822	NM_021377	58178	Mm.313672	NM_021377	ENSMUSG00000043531	Sorcs1	Sorcs|mSorCS	sortilin-related VPS10 domain containing receptor 1	protein-coding
3913	chr12	85233404	85233939	+	6.91	7.85	3.37	4.48	5.34e-23	1.6e-21	0	NA	TTS (NM_001304475)	TTS (NM_001304475)	12314	NR_105903	102466769		NR_105903	ENSMUSG00000098263	Mir6938	Gm27519|mmu-mir-6938	microRNA 6938	ncRNA
5273	chr13	95427530	95428104	+	6.89	7.83	3.35	4.48	2.19e-20	4.87e-19	0	NA	Intergenic	ORR1E|LTR|ERVL-MaLR	17014	NM_198408	12919	Mm.316614	NM_198408	ENSMUSG00000021680	Crhbp	CRH-BP	corticotropin releasing hormone binding protein	protein-coding
6553	chr17	84334242	84334667	+	6.47	7.41	2.92	4.48	1.17e-18	2.09e-17	0	NA	intron (NM_183021	intron 27 of 37)	intron (NM_183021	intron 27 of 37)	131754	NM_183021	240174	Mm.246767	NM_177826	ENSMUSG00000024251	Thada	6530405K19|A930021O22|AU019899|BC052885|GITA	thyroid adenoma associated	protein-coding
6604	chr11	83843496	83844131	+	6.53	7.47	2.98	4.48	1.34e-18	2.39e-17	0	NA	Intergenic	Intergenic	-7056	NM_001291268	21410	Mm.7226	NM_009330	ENSMUSG00000020679	Hnf1b	HNF-1-beta|HNF-1B|HNF-1Beta|Hnf1beta|LFB3|Tcf-2|Tcf2|vHNF1	HNF1 homeobox B	protein-coding
6886	chr7	100312747	100313169	+	6.46	7.4	2.92	4.48	3.12e-18	5.31e-17	0	NA	intron (NM_177161	intron 8 of 12)	intron (NM_177161	intron 8 of 12)	27438	NM_177161	320452	Mm.150294	NM_177161	ENSMUSG00000051048	P4ha3	D930031A02Rik	procollagen-proline	2-oxoglutarate 4-dioxygenase (proline 4-hydroxylase)	alpha polypeptide III	protein-coding
9225	chr17	79135712	79136155	+	6.43	7.37	2.89	4.48	7.34e-16	9.33e-15	0	NA	Intergenic	Intergenic	84027	NM_001316729	70536	Mm.293870	NM_027455	ENSMUSG00000024084	Qpct	5730422A13Rik	glutaminyl-peptide cyclotransferase (glutaminyl cyclase)	protein-coding
11708	chr10	29381521	29382004	+	6.06	7	2.52	4.48	4.64e-14	4.65e-13	0	NA	Intergenic	Intergenic	-19320	NM_026518	68031	Mm.28930	NM_026518	ENSMUSG00000038876	Rnf146	2610509H23Rik|Iduna	ring finger protein 146	protein-coding
12537	chr5	103955560	103956136	+	6.01	6.95	2.47	4.48	1.55e-13	1.45e-12	0	NA	3' UTR (NM_198030	exon 7 of 7)	3' UTR (NM_198030	exon 7 of 7)	21540	NM_198030	243168	Mm.284944	NM_198030	ENSMUSG00000034528	Hsd17b13	AI047820|PAN1B-like|Pan1b	hydroxysteroid (17-beta) dehydrogenase 13	protein-coding
13449	chr3	53376961	53377486	+	6.01	6.95	2.47	4.48	4.96e-13	4.32e-12	0	NA	Intergenic	Intergenic	86035	NM_172501	212114	Mm.85744	NM_172501	ENSMUSG00000042997	Nhlrc3	4833441N19|8030451K01Rik|mKIAA4083	NHL repeat containing 3	protein-coding
16685	chr18	66260219	66260877	+	5.8	6.73	2.25	4.48	1.61e-11	1.13e-10	0	NA	intron (NM_178793	intron 2 of 10)	intron (NM_178793	intron 2 of 10)	31290	NM_178793	320924	Mm.442049	NM_178793	ENSMUSG00000046318	Ccbe1	4933426F18Rik|9430093N24Rik|mKIAA1983	collagen and calcium binding EGF domains 1	protein-coding
17035	chr2	117634939	117635367	+	5.64	6.58	2.1	4.48	2.25e-11	1.54e-10	0	NA	Intergenic	Intergenic	177649	NR_126427	100504728	Mm.413174	NR_126427		Gm13985	-	predicted gene 13985	ncRNA
26221	chr1	53721433	53721675	+	5.02	5.95	1.48	4.48	1.13e-08	5.04e-08	0	NA	Intergenic	MER21C|LTR|ERVL	-14770	NM_001252070	627872	Mm.184692	NM_001252070	ENSMUSG00000096141	Dnah7a	Dnahc7|Dnahc7a|Gm992	dynein	axonemal	heavy chain 7A	protein-coding
26651	chr9	121132537	121132848	+	5.2	6.14	1.65	4.48	1.42e-08	6.24e-08	0	NA	intron (NM_177589	intron 30 of 36)	intron (NM_177589	intron 30 of 36)	144480	NM_177589	209012	Mm.371804	NM_177589	ENSMUSG00000040936	Ulk4	4932415A06Rik|A730098P15	unc-51-like kinase 4	protein-coding
42	chr13	60842147	60844186	+	9.33	10.27	5.8	4.47	6.6e-80	1.84e-76	0	NA	intron (NM_178098	intron 7 of 7)	intron (NM_178098	intron 7 of 7)	21250	NM_178098	214639	Mm.19839	NM_178098	ENSMUSG00000050345	4930486L24Rik	AW545031	RIKEN cDNA 4930486L24 gene	protein-coding
59	chr16	92620396	92622494	+	9.22	10.16	5.68	4.47	5.93e-74	1.18e-70	0	NA	intron (NM_001111022	intron 5 of 6)	intron (NM_001111022	intron 5 of 6)	75884	NM_009821	12394	Mm.4081	NM_009821	ENSMUSG00000022952	Runx1	AML1|CBF-alpha-2|Cbfa2|Pebp2a2|Pebpa2b	runt related transcription factor 1	protein-coding
586	chr1	150027099	150027863	+	8.16	9.1	4.62	4.47	4.09e-43	8.19e-41	0	NA	Intergenic	Intergenic	-66191	NM_008869	18783	Mm.4186	NM_008869	ENSMUSG00000056220	Pla2g4a	Pla2g4|cPLA2|cPLA2-alpha|cPLA2alpha	phospholipase A2	group IVA (cytosolic	calcium-dependent)	protein-coding
938	chr3	36540639	36541257	+	7.85	8.79	4.31	4.47	5.15e-38	6.44e-36	0	NA	Intergenic	Intergenic	-11658	NM_019393	50911	Mm.116711	NM_019393	ENSMUSG00000027714	Exosc9	PM/Scl-75|Pmscl1|RRP45|p5|p6	exosome component 9	protein-coding
1164	chr18	63400421	63401495	+	7.83	8.76	4.29	4.47	3.97e-35	3.99e-33	0	NA	Intergenic	Intergenic	-13775	NM_001039485	667742	Mm.158720	NM_172629	ENSMUSG00000041482	Piezo2	5930434P17|9030411M15Rik|9430028L06Rik|Fam38b|Fam38b2	piezo-type mechanosensitive ion channel component 2	protein-coding
2583	chr10	72634018	72634641	+	7.36	8.3	3.83	4.47	7.45e-27	3.38e-25	0	NA	Intergenic	Intergenic	-20517	NM_025635	52696	Mm.62876	NM_025635	ENSMUSG00000019923	Zwint	2010007E07Rik|2600001N01Rik|D10Ertd749e|Zwint-1	ZW10 interactor	protein-coding
5279	chr16	14143303	14143853	+	6.68	7.62	3.15	4.47	2.25e-20	4.99e-19	0	NA	intron (NM_001081154	intron 7 of 26)	B1_Mur3|SINE|Alu	15696	NM_001081154	223989	Mm.85442	NM_001081154	ENSMUSG00000060657	Marf1	4921513D23Rik|BC031575|C87306|E030019O05|Lkap|mKIAA0430	meiosis regulator and mRNA stability 1	protein-coding
6617	chr11	110942618	110943279	+	6.58	7.51	3.05	4.47	1.4e-18	2.49e-17	0	NA	Intergenic	Intergenic	-25085	NM_010604	16517	Mm.30176	NM_010604	ENSMUSG00000051497	Kcnj16	6430410F18Rik|AI132396|Kir5.1	potassium inwardly-rectifying channel	subfamily J	member 16	protein-coding
10074	chr15	64618293	64618898	+	6.19	7.12	2.65	4.47	3.62e-15	4.22e-14	0	NA	Intergenic	Intergenic	-235676	NM_001276461	13196	Mm.277236	NM_010026	ENSMUSG00000022377	Asap1	AV239055|DEF-1|Ddef1|PAP|mKIAA1249|s19	ArfGAP with SH3 domain	ankyrin repeat and PH domain1	protein-coding
24313	chr1	91955899	91957127	+	8.28	9.22	4.75	4.47	4.06e-09	1.96e-08	0	NA	intron (NM_207225	intron 20 of 26)	URR1A|DNA|hAT-Charlie	155052	NM_007855	13345	Mm.9474	NM_007855	ENSMUSG00000007805	Twist2	Dermo1|bHLHa39	twist basic helix-loop-helix transcription factor 2	protein-coding
26842	chr19	17263249	17263516	+	5.04	5.98	1.51	4.47	1.58e-08	6.9e-08	0	NA	Intergenic	Intergenic	76123	NM_001136484	14537	Mm.244825	NM_010265	ENSMUSG00000038843	Gcnt1	5630400D21Rik|B130048E03|C2 GlcNAcT|C2GNT|IGnT	glucosaminyl (N-acetyl) transferase 1	core 2	protein-coding
27334	chr4	141833910	141834238	+	4.98	5.92	1.45	4.47	2.05e-08	8.77e-08	0	NA	Intergenic	MLT1D|LTR|ERVL-MaLR	-8069	NM_007919	13706	Mm.45316	NM_007919	ENSMUSG00000058579	Cela2a	Ela-2|Ela2|Ela2a	chymotrypsin-like elastase family	member 2A	protein-coding
30189	chr15	90431114	90431438	+	5.06	5.99	1.53	4.47	7.84e-08	3.04e-07	0	NA	Intergenic	RLTR48A|LTR|ERV1	77566	NR_155426	102640415	Mm.394352	NR_155426	ENSMUSG00000116204	Gm36480	-	predicted gene	36480	ncRNA
35857	chr12	81097754	81098026	+	4.57	5.5	1.03	4.47	7.41e-07	2.42e-06	0	NA	intron (NM_001146217	intron 1 of 12)	intron (NM_001146217	intron 1 of 12)	-68261	NR_037227	100526532		NR_037227	ENSMUSG00000092673	Mir3067	mir-3067|mmu-mir-3067	microRNA 3067	ncRNA
40849	chr7	114432064	114432262	+	4.55	5.49	1.01	4.47	3.72e-06	1.07e-05	0	NA	intron (NM_011055	intron 1 of 15)	Arthur1B|DNA|hAT-Tip100	16909	NM_011055	18576	Mm.430730	NM_011055	ENSMUSG00000030671	Pde3b	9830102A01Rik|AI847709	phosphodiesterase 3B	cGMP-inhibited	protein-coding
477	chr3	38276747	38277999	+	8.25	9.19	4.72	4.46	9.83e-46	2.42e-43	0	NA	Intergenic	Intergenic	-69254	NR_040541	71342	Mm.410782	NR_040541	ENSMUSG00000106002	5430434I15Rik	-	RIKEN cDNA 5430434I15 gene	ncRNA
531	chr9	78623042	78624111	+	8.19	9.13	4.66	4.46	2.72e-44	6e-42	0	NA	intron (NM_153098	intron 2 of 32)	intron (NM_153098	intron 2 of 32)	8030	NM_153098	235505	Mm.32955	NM_153098	ENSMUSG00000046186	Cd109	9930012E15Rik|AI480638|GARP	CD109 antigen	protein-coding
3670	chr3	50437905	50438577	+	6.99	7.93	3.47	4.46	1.28e-23	4.08e-22	0	NA	intron (NM_011990	intron 2 of 11)	intron (NM_011990	intron 2 of 11)	5372	NM_011990	26570	Mm.260988	NM_011990	ENSMUSG00000027737	Slc7a11	9930009M05Rik|AI451155|sut|xCT	solute carrier family 7 (cationic amino acid transporter	y+ system)	member 11	protein-coding
4660	chr19	36290689	36291343	+	7.03	7.97	3.51	4.46	1.85e-21	4.66e-20	0	NA	Intergenic	Intergenic	-88051	NM_029508	76073	Mm.259180	NM_029508	ENSMUSG00000024805	Pcgf5	0610009F02Rik|1110054A01Rik|5830406C17Rik|5830443C21Rik|9530023M17Rik|AI324127	polycomb group ring finger 5	protein-coding
5774	chr11	85157208	85157757	+	6.59	7.53	3.06	4.46	1.18e-19	2.39e-18	0	NA	Intergenic	RMER15-int|LTR|ERVL	-13614	NM_028589	73634	Mm.48850	NM_028589	ENSMUSG00000018479	1700125H20Rik	-	RIKEN cDNA 1700125H20 gene	protein-coding
7452	chr10	120308752	120309093	+	6.39	7.32	2.86	4.46	1.39e-17	2.19e-16	0	NA	Intergenic	Intergenic	-80601	NR_040626	320626	Mm.446091	NR_040626	ENSMUSG00000090191	9230105E05Rik	-	RIKEN cDNA 9230105E05 gene	ncRNA
8230	chr6	143868186	143868669	+	6.39	7.33	2.86	4.46	9.19e-17	1.31e-15	0	NA	intron (NM_001113559	intron 9 of 13)	B1F|SINE|Alu	78679	NM_001347506	20678	Mm.1752	NM_011444	ENSMUSG00000041540	Sox5	A730017D01Rik|AI528773	SRY (sex determining region Y)-box 5	protein-coding
9610	chr18	12041339	12041830	+	6.12	7.06	2.6	4.46	1.59e-15	1.94e-14	0	NA	intron (NM_178801	intron 13 of 14)	L1M4a2|LINE|L1	79953	NM_001289666	338363	Mm.271567	NM_178801	ENSMUSG00000049411	Tmem241	6030446N20Rik	transmembrane protein 241	protein-coding
14575	chr4	116411438	116411771	+	5.79	6.73	2.27	4.46	1.87e-12	1.5e-11	0	NA	intron (NM_001042743	intron 3 of 29)	Lx9|LINE|L1	52577	NM_008641	17776	Mm.9287	NM_008641	ENSMUSG00000003810	Mast2	MAST205|Mtssk	microtubule associated serine/threonine kinase 2	protein-coding
35261	chr11	50565072	50566349	+	8.75	9.69	5.23	4.46	5.97e-07	1.98e-06	0	NA	Intergenic	Intergenic	-36375	NM_175643	216725	Mm.110597	NM_175643	ENSMUSG00000036545	Adamts2	ADAM-TS 2|ADAM-TS2|ADAMTS-2|PC I-NP|PCINP|pNPI	a disintegrin-like and metallopeptidase (reprolysin type) with thrombospondin type 1 motif	2	protein-coding
43	chr2	5613538	5614617	+	9.35	10.28	5.83	4.45	3.35e-79	9.14e-76	0	NA	intron (NM_001290374	intron 1 of 9)	intron (NM_001290374	intron 1 of 9)	61969	NM_001290376	227541	Mm.191949	NM_177343	ENSMUSG00000039145	Camk1d	A630059D12Rik|CKLiK|CaMKIdelta|E030025C11Rik|mCKLiK	calcium/calmodulin-dependent protein kinase ID	protein-coding
311	chr17	79745964	79746765	+	8.41	9.35	4.9	4.45	6.17e-51	2.33e-48	0	NA	Intergenic	Intergenic	-31323	NM_009994	13078	Mm.214016	NM_009994	ENSMUSG00000024087	Cyp1b1	CP1B|P4501b1	cytochrome P450	family 1	subfamily b	polypeptide 1	protein-coding
432	chr19	38037702	38038868	+	8.29	9.22	4.77	4.45	1.16e-46	3.15e-44	0	NA	intron (NM_001302140	intron 1 of 53)	intron (NM_001302140	intron 1 of 53)	5292	NM_001099634	226101	Mm.34674	NM_177035	ENSMUSG00000048612	Myof	2310004N10Rik|2310051D19Rik|E030042N20Rik|Fer1l3	myoferlin	protein-coding
947	chr15	79623631	79624597	+	8	8.94	4.49	4.45	8.3e-38	1.03e-35	0	NA	intron (NM_029407	intron 13 of 17)	intron (NM_029407	intron 13 of 17)	-19005	NM_010059	13404	Mm.2524	NM_010059	ENSMUSG00000022429	Dmc1	Dmc1h|Lim15|Mei11|sgdp	DNA meiotic recombinase 1	protein-coding
1239	chr6	143915945	143916860	+	8.03	8.96	4.51	4.45	1.51e-34	1.43e-32	0	NA	intron (NM_011444	intron 8 of 14)	intron (NM_011444	intron 8 of 14)	30704	NM_001347506	20678	Mm.1752	NM_011444	ENSMUSG00000041540	Sox5	A730017D01Rik|AI528773	SRY (sex determining region Y)-box 5	protein-coding
2115	chr6	4349828	4350536	+	7.36	8.3	3.85	4.45	7.18e-29	3.98e-27	0	NA	Intergenic	Intergenic	-155436	NM_007743	12843	Mm.277792	NM_007743	ENSMUSG00000029661	Col1a2	AA960264|AI325291|Col1a-2|Cola-2|Cola2|oim	collagen	type I	alpha 2	protein-coding
2678	chr13	3782247	3782990	+	7.44	8.37	3.92	4.45	1.62e-26	7.09e-25	0	NA	Intergenic	Intergenic	21700	NM_027416	70405	Mm.20079	NM_027416	ENSMUSG00000063130	Calml3	2310068O22Rik|AI326174	calmodulin-like 3	protein-coding
3315	chr12	70695074	70695845	+	7.43	8.37	3.91	4.45	1.43e-24	5.05e-23	0	NA	Intergenic	Intergenic	-130055	NM_028127	319710	Mm.2962	NM_028127	ENSMUSG00000048285	Frmd6	2610019M19Rik|4930488L10Rik|AW212977|Willin	FERM domain containing 6	protein-coding
4066	chr13	21305821	21306517	+	6.88	7.82	3.37	4.45	1.25e-22	3.59e-21	0	NA	Intergenic	Intergenic	-6034	NM_145451	75512	Mm.46195	NM_145451	ENSMUSG00000004341	Gpx6	1700020G18Rik|Ry2d1|olfactory	glutathione peroxidase 6	protein-coding
4153	chr11	86604556	86605224	+	6.89	7.83	3.38	4.45	1.97e-22	5.57e-21	0	NA	intron (NM_001356531	intron 9 of 11)	intron (NM_001356531	intron 9 of 11)	-20732	NR_029738	387140		NR_029738	ENSMUSG00000065455	Mir21a	Mir21|Mirn21|mmu-mir-21|mmu-mir-21a	microRNA 21a	ncRNA
4210	chr8	93945667	93946348	+	7.15	8.08	3.63	4.45	2.56e-22	7.13e-21	0	NA	intron (NM_001113384	intron 4 of 7)	MER20|DNA|hAT-Charlie	66633	NM_011787	23802	Mm.34641	NM_011787	ENSMUSG00000031751	Amfr	gp78	autocrine motility factor receptor	protein-coding
6112	chr5	131961752	131962392	+	6.64	7.57	3.12	4.45	3.08e-19	5.92e-18	0	NA	intron (NM_177047	intron 4 of 19)	intron (NM_177047	intron 4 of 19)	81803	NR_040704	75369	Mm.389696	NR_040704	ENSMUSG00000105773	4930563F08Rik	-	RIKEN cDNA 4930563F08 gene	ncRNA
6577	chr11	111845448	111846109	+	6.6	7.54	3.09	4.45	1.25e-18	2.24e-17	0	NA	Intergenic	Intergenic	779614	NM_008425	16518	Mm.4951	NM_008425	ENSMUSG00000041695	Kcnj2	IRK1|Kcnf1|Kir2.1	potassium inwardly-rectifying channel	subfamily J	member 2	protein-coding
9857	chr2	11655484	11655892	+	6.18	7.12	2.66	4.45	2.63e-15	3.13e-14	0	NA	intron (NM_008367	intron 1 of 7)	intron (NM_008367	intron 1 of 7)	12896	NM_008367	16184	Mm.915	NM_008367	ENSMUSG00000026770	Il2ra	CD25|Il2r|Ly-43	interleukin 2 receptor	alpha chain	protein-coding
14089	chr12	17085251	17085540	+	5.88	6.82	2.37	4.45	1.11e-12	9.25e-12	0	NA	Intergenic	MIRc|SINE|MIR	-73668	NM_001201332	73667	Mm.159048	NM_001201332	ENSMUSG00000071398	2410004P03Rik	-	RIKEN cDNA 2410004P03 gene	protein-coding
26428	chr15	51907057	51907525	+	5.04	5.98	1.53	4.45	1.26e-08	5.6e-08	0	NA	Intergenic	Intergenic	29850	NM_030132	78581	Mm.176347	NM_030132	ENSMUSG00000022313	Utp23	1700010I21Rik|AI662478|BB238373|D530033C11Rik	UTP23 small subunit processome component	protein-coding
29640	chr4	55837349	55837561	+	4.78	5.71	1.26	4.45	6.05e-08	2.39e-07	0	NA	Intergenic	Intergenic	-304980	NM_010637	16600	Mm.4325	NM_010637	ENSMUSG00000003032	Klf4	EZF|Gklf|Zie	Kruppel-like factor 4 (gut)	protein-coding
79018	chr15	82368012	82374037	+	10.35	11.29	6.84	4.45	0.00769	0.0114	0.0114	NA	3' UTR (NM_001163472	exon 10 of 10)	3' UTR (NM_001163472	exon 10 of 10)	9236	NM_019823	56448	Mm.474216	NM_019823	ENSMUSG00000061740	Cyp2d22	2D22	cytochrome P450	family 2	subfamily d	polypeptide 22	protein-coding
2020	chr4	126872534	126873209	+	7.5	8.44	3.99	4.44	2.84e-29	1.65e-27	0	NA	intron (NM_001114399	intron 26 of 29)	intron (NM_001114399	intron 26 of 29)	95052	NM_001357201	67785	Mm.165401	NM_001114399	ENSMUSG00000042446	Zmym4	6330503C17Rik|AI480785|AW493829|CDIR|D630001M21|MYM|Zfp262|Znf262|mKIAA0425	zinc finger	MYM-type 4	protein-coding
2499	chr5	137440060	137440878	+	7.54	8.48	4.03	4.44	3.34e-27	1.57e-25	0	NA	intron (NM_011741	intron 29 of 87)	RMER19B|LTR|ERVK	36595	NM_011741	22635	Mm.7984	NM_011741	ENSMUSG00000079173	Zan	Zan-test	zonadhesin	protein-coding
2769	chr7	112388214	112388952	+	7.26	8.19	3.75	4.44	2.98e-26	1.26e-24	0	NA	intron (NM_027587	intron 4 of 9)	L1MEc|LINE|L1	20275	NM_027587	100504195	Mm.291129	NM_027587	ENSMUSG00000030771	Micalcl	4921517J23Rik	MICAL C-terminal like	protein-coding
3971	chr2	109680904	109681551	+	7.13	8.07	3.63	4.44	6.86e-23	2.02e-21	0	NA	intron (NM_001285419	intron 1 of 1)	intron (NM_001285419	intron 1 of 1)	4195	NM_001285419	12064	Mm.1442	NM_007540	ENSMUSG00000048482	Bdnf	-	brain derived neurotrophic factor	protein-coding
4082	chr10	86171247	86171721	+	7.14	8.08	3.64	4.44	1.38e-22	3.95e-21	0	NA	intron (NM_013722	intron 6 of 13)	intron (NM_013722	intron 6 of 13)	75630	NR_038024	78170	Mm.444790	NR_038024	ENSMUSG00000112493	4930486F22Rik	-	RIKEN cDNA 4930486F22 gene	ncRNA
4359	chr8	122167245	122167913	+	7.48	8.41	3.97	4.44	5.07e-22	1.37e-20	0	NA	Intergenic	Intergenic	-114562	NM_009569	22761	Mm.3105	NM_009569	ENSMUSG00000049577	Zfpm1	FOG|Fog1	zinc finger protein	multitype 1	protein-coding
4675	chr14	120520696	120521406	+	6.76	7.7	3.26	4.44	2.05e-21	5.14e-20	0	NA	Intergenic	Intergenic	42590	NM_029519	76108	Mm.261448	NM_029519	ENSMUSG00000051615	Rap2a	5830461H18Rik	RAS related protein 2a	protein-coding
5603	chr6	50766328	50766979	+	6.69	7.63	3.19	4.44	6.46e-20	1.35e-18	0	NA	Intergenic	Intergenic	-9462	NR_045984	319981	Mm.131454	NR_045984	ENSMUSG00000107667	C530044C16Rik	-	RIKEN cDNA C530044C16 gene	ncRNA
7027	chr3	145195355	145195902	+	6.42	7.36	2.92	4.44	4.64e-18	7.74e-17	0	NA	Intergenic	Intergenic	77028	NM_025714	52184	Mm.259105	NM_025714	ENSMUSG00000028256	Odf2l	4733401D09Rik|9630045K08Rik|D3Ertd250e	outer dense fiber of sperm tails 2-like	protein-coding
14197	chr8	94255656	94255973	+	5.87	6.8	2.36	4.44	1.24e-12	1.03e-11	0	NA	intron (NM_172410	intron 4 of 22)	intron (NM_172410	intron 4 of 22)	-11033	NM_001357267	71805	Mm.458170	NM_172410	ENSMUSG00000032939	Nup93	2410008G02Rik	nucleoporin 93	protein-coding
16861	chr2	11458546	11458999	+	5.73	6.67	2.23	4.44	1.91e-11	1.33e-10	0	NA	Intergenic	Intergenic	43318	NM_001177757	170768	Mm.19669	NM_133232	ENSMUSG00000026773	Pfkfb3	E330010H22Rik|iPFK-2|uPFK-2	6-phosphofructo-2-kinase/fructose-2	6-biphosphatase 3	protein-coding
17131	chr2	58580304	58580740	+	5.49	6.43	1.99	4.44	2.45e-11	1.67e-10	0	NA	intron (NM_001289660	intron 1 of 7)	intron (NM_001289660	intron 1 of 7)	13188	NM_001289660	76654	Mm.200370	NM_029692	ENSMUSG00000026839	Upp2	1700124F02Rik|AI266885|UDRPASE2|UP2|UPASE2	uridine phosphorylase 2	protein-coding
19007	chr7	111976436	111976769	+	5.36	6.29	1.85	4.44	1.16e-10	7.18e-10	0	NA	Intergenic	Intergenic	-46904	NM_133758	74996	Mm.16974	NM_133758	ENSMUSG00000059263	Usp47	4930502N04Rik|A630020C16Rik	ubiquitin specific peptidase 47	protein-coding
20207	chr19	31355038	31355435	+	5.33	6.27	1.83	4.44	2.94e-10	1.71e-09	0	NA	intron (NM_001013833	intron 2 of 17)	intron (NM_001013833	intron 2 of 17)	-138840	NR_002849	78103	Mm.445198	NR_002849		8430431K14Rik	-	RIKEN cDNA 8430431K14 gene	ncRNA
20505	chr18	80234458	80234768	+	5.55	6.48	2.04	4.44	3.6e-10	2.06e-09	0	NA	intron (NM_001136181	intron 3 of 4)	B3|SINE|B2	12489	NM_001136181	66255	Mm.272341	NM_001136181	ENSMUSG00000078963	Hsbp1l1	1810005K13Rik	heat shock factor binding protein 1-like 1	protein-coding
23600	chrX	164394182	164394403	+	5.17	6.1	1.66	4.44	2.69e-09	1.33e-08	0	NA	intron (NM_010216	intron 3 of 6)	intron (NM_010216	intron 3 of 6)	20770	NM_001308489	14205	Mm.297978	NM_010216	ENSMUSG00000031380	Vegfd	AI325264|Figf|VEGF-D	vascular endothelial growth factor D	protein-coding
25945	chr13	53969465	53969726	+	4.98	5.92	1.48	4.44	9.79e-09	4.42e-08	0	NA	Intergenic	Intergenic	-53847	NR_152124	78550	Mm.160095	NR_152124		E130119H09Rik	-	RIKEN cDNA E130119H09 gene	ncRNA
43306	chr13	41051404	41051627	+	4.21	5.14	0.71	4.44	7.3e-06	1.98e-05	0	NA	intron (NM_001145803	intron 5 of 14)	intron (NM_001145803	intron 5 of 14)	18950	NM_008547	17152	Mm.8149	NM_008547	ENSMUSG00000021363	Mak	A930010O05Rik	male germ cell-associated kinase	protein-coding
44301	chr6	110128466	110128642	+	4.16	5.09	0.65	4.44	9.67e-06	2.56e-05	0	NA	Intergenic	Intergenic	-516958	NM_001346640	108073	Mm.240881	NM_177328	ENSMUSG00000056755	Grm7	6330570A01Rik|BB176677|C030018L03|E130018M02Rik|Gpr1g|Gprc1g|SMN2|Tg(SMN2)89Ahmb|mGluR7	glutamate receptor	metabotropic 7	protein-coding
20	chr2	118127059	118132738	+	9.98	10.92	6.48	4.43	8.17e-91	4.79e-87	0	NA	Intergenic	Intergenic	18022	NM_011580	21825	Mm.4159	NM_011580	ENSMUSG00000040152	Thbs1	TSP-1|TSP1|Thbs-1|tbsp1	thrombospondin 1	protein-coding
314	chr5	136051320	136052295	+	8.62	9.55	5.12	4.43	7.52e-51	2.81e-48	0	NA	Intergenic	Intergenic	-5460	NR_153102	69665	Mm.75713	NM_027158	ENSMUSG00000006143	Upk3bl	2310043J07Rik|Upk3bl1	uroplakin 3B-like	protein-coding
1069	chr7	82423298	82424196	+	7.78	8.71	4.29	4.43	3.47e-36	3.81e-34	0	NA	intron (NM_001190374	intron 3 of 29)	intron (NM_001190374	intron 3 of 29)	88053	NM_001190374	269959	Mm.65306	NM_001190374	ENSMUSG00000070469	Adamtsl3	9230119C12Rik|C130057K09|mKIAA1233	ADAMTS-like 3	protein-coding
1107	chr2	27330666	27332194	+	7.87	8.8	4.37	4.43	1.11e-35	1.18e-33	0	NA	intron (NR_133905	intron 2 of 29)	intron (NR_133905	intron 2 of 29)	-84127	NM_138665	192166	Mm.278467	NM_138665	ENSMUSG00000009614	Sardh	-	sarcosine dehydrogenase	protein-coding
2765	chr17	35039229	35040105	+	7.18	8.11	3.68	4.43	2.87e-26	1.22e-24	0	NA	intron (NM_013600	intron 9 of 23)	intron (NM_013600	intron 9 of 23)	6955	NR_130641	17687	Mm.24192	NM_013600	ENSMUSG00000007035	Msh5	Mut5	mutS homolog 5	protein-coding
3720	chr2	75112701	75114018	+	7.55	8.49	4.06	4.43	1.83e-23	5.76e-22	0	NA	Intergenic	Intergenic	287547	NM_016804	53375	Mm.292613	NM_016804	ENSMUSG00000027099	Mtx2	1500012G02Rik	metaxin 2	protein-coding
5195	chr16	3723137	3723648	+	6.85	7.78	3.35	4.43	1.66e-20	3.76e-19	0	NA	Intergenic	Intergenic	-5268	NM_019453	54483	Mm.143718	NM_019453	ENSMUSG00000022534	Mefv	FMF|TRIM20|pyrin	Mediterranean fever	protein-coding
5493	chr11	104361555	104362147	+	6.76	7.69	3.26	4.43	4.56e-20	9.73e-19	0	NA	intron (NM_001359634	intron 5 of 14)	RLTR19|LTR|ERVK	80440	NM_001081045	76719	Mm.136418	NM_001081045	ENSMUSG00000018412	Kansl1	1700081L11Rik|9430041J06Rik|mKIAA1267	KAT8 regulatory NSL complex subunit 1	protein-coding
5643	chr17	14718476	14719242	+	6.79	7.72	3.3	4.43	7.53e-20	1.56e-18	0	NA	Intergenic	Intergenic	-24597	NM_011581	21826	Mm.26688	NM_011581	ENSMUSG00000023885	Thbs2	TSP2|Thbs-2	thrombospondin 2	protein-coding
8609	chr3	63563096	63563538	+	6.33	7.27	2.84	4.43	2.14e-16	2.91e-15	0	NA	Intergenic	RLTR30D2_MM|LTR|ERV1	124066	NR_153189	102637430	Mm.209619	NR_153189	ENSMUSG00000104336	Gm34240	-	predicted gene	34240	ncRNA
12422	chr5	104251724	104252247	+	6.07	7	2.57	4.43	1.32e-13	1.25e-12	0	NA	Intergenic	MamGypLTR3a|LTR|Gypsy	-47302	NM_008318	15891	Mm.4987	NM_008318	ENSMUSG00000029306	Ibsp	BSP|BSP II|BSPII|Bsp2	integrin binding sialoprotein	protein-coding
13035	chr6	71846920	71847450	+	6.04	6.98	2.54	4.43	3.03e-13	2.73e-12	0	NA	intron (NM_001362138	intron 3 of 13)	B2_Mm1t|SINE|B2	15865	NM_001253687	76614	Mm.235123	NM_029673	ENSMUSG00000052337	Immt	1700082C19Rik|D830041H16Rik|HMP|P87|P87/89|P89	inner membrane protein	mitochondrial	protein-coding
13228	chr8	110995326	110995855	+	6.11	7.04	2.61	4.43	3.77e-13	3.34e-12	0	NA	intron (NM_007916	intron 1 of 11)	intron (NM_007916	intron 1 of 11)	2233	NM_007916	13680	Mm.287901	NM_007916	ENSMUSG00000015023	Ddx19a	DBP5|Ddx19|Eif4a-rs1	DEAD (Asp-Glu-Ala-Asp) box polypeptide 19a	protein-coding
14181	chr6	87970111	87970559	+	5.92	6.85	2.42	4.43	1.23e-12	1.02e-11	0	NA	Intergenic	Intergenic	11147	NM_198622	243529	Mm.33796	NM_198622	ENSMUSG00000044927	H1fx	Gm461|H1.10|H1X	H1 histone family	member X	protein-coding
15488	chr5	131993994	131994366	+	5.63	6.56	2.13	4.43	5.02e-12	3.8e-11	0	NA	intron (NM_177047	intron 4 of 19)	intron (NM_177047	intron 4 of 19)	113911	NR_040704	75369	Mm.389696	NR_040704	ENSMUSG00000105773	4930563F08Rik	-	RIKEN cDNA 4930563F08 gene	ncRNA
15798	chr17	87849040	87849281	+	5.61	6.55	2.12	4.43	6.8e-12	5.05e-11	0	NA	Intergenic	PB1D10|SINE|Alu	-51166	NM_199251	210741	Mm.312046	NM_199251	ENSMUSG00000050138	Kcnk12	mntk1	potassium channel	subfamily K	member 12	protein-coding
20032	chr12	85388617	85388884	+	5.37	6.31	1.88	4.43	2.63e-10	1.54e-09	0	NA	Intergenic	Intergenic	-14033	NM_026775	68581	Mm.379159	NM_026775	ENSMUSG00000021248	Tmed10	1110014C03Rik|Tmp21|p23|p24delta1	transmembrane p24 trafficking protein 10	protein-coding
37890	chr2	35238754	35239022	+	4.46	5.4	0.97	4.43	1.46e-06	4.52e-06	0	NA	Intergenic	Intergenic	-17471	NM_001206367	227753	Mm.443	NM_146120	ENSMUSG00000026879	Gsn	ADF	gelsolin	protein-coding
137	chr8	126681563	126682937	+	8.72	9.66	5.24	4.42	3.44e-62	2.94e-59	0	NA	Intergenic	Intergenic	-88814	NM_001164598	270110	Mm.334918	NM_001164598	ENSMUSG00000051495	Irf2bp2	E130305N23Rik|IRF-2BP2	interferon regulatory factor 2 binding protein 2	protein-coding
1777	chr11	75399324	75399998	+	7.61	8.54	4.12	4.42	1.26e-30	8.28e-29	0	NA	exon (NM_001102611	exon 6 of 11)	exon (NM_001102611	exon 6 of 11)	22962	NM_011340	20317	Mm.2044	NM_011340	ENSMUSG00000000753	Serpinf1	AI195227|EPC-1|Pedf|Pedfl|Sdf3	serine (or cysteine) peptidase inhibitor	clade F	member 1	protein-coding
2257	chr9	117571063	117571778	+	7.57	8.5	4.08	4.42	3.52e-28	1.83e-26	0	NA	intron (NM_001172121	intron 1 of 14)	intron (NM_001172121	intron 1 of 14)	58493	NM_001172121	207181	Mm.326411	NM_178660	ENSMUSG00000039607	Rbms3	6720477E09Rik|8430436O14Rik	RNA binding motif	single stranded interacting protein	protein-coding
4496	chr5	64992506	64992965	+	6.82	7.75	3.33	4.42	8.93e-22	2.33e-20	0	NA	intron (NM_026667	intron 2 of 13)	intron (NM_026667	intron 2 of 13)	22417	NR_030577	100124451		NR_030577	ENSMUSG00000077042	Mir574	Mirn574|mir-574|mmu-mir-574	microRNA 574	ncRNA
6671	chrX	95948178	95948808	+	6.48	7.41	2.99	4.42	1.62e-18	2.84e-17	0	NA	intron (NM_152822	intron 7 of 12)	intron (NM_152822	intron 7 of 12)	8481	NM_152822	76130	Mm.274318	NM_152822	ENSMUSG00000057421	Las1l	1810030A06Rik|5830482G23Rik	LAS1-like (S. cerevisiae)	protein-coding
7829	chr16	45849002	45849562	+	6.41	7.35	2.93	4.42	3.48e-17	5.22e-16	0	NA	Intergenic	Intergenic	-4531	NM_001357078	208177	Mm.211477	NM_153412	ENSMUSG00000033149	Phldb2	AV253284|C820004H04Rik|LL5b|LL5beta	pleckstrin homology like domain	family B	member 2	protein-coding
8801	chrX	7308240	7308678	+	6.27	7.21	2.78	4.42	3.15e-16	4.2e-15	0	NA	intron (NM_001243762	intron 2 of 13)	intron (NM_001243762	intron 2 of 13)	10899	NM_001243762	12728	Mm.486257	NM_016691	ENSMUSG00000004317	Clcn5	5430408K11Rik|ClC-5|Clc4-1|Clc5|Clcn4-1|D930009B12Rik|DXImx42e|Sfc13|T25545	chloride channel	voltage-sensitive 5	protein-coding
8897	chr3	123571866	123572648	+	6.39	7.32	2.9	4.42	3.88e-16	5.11e-15	0	NA	intron (NR_121616	intron 6 of 13)	intron (NR_121616	intron 6 of 13)	47193	NM_001293682	83398	Mm.443908	NM_031186	ENSMUSG00000027977	Ndst3	4921531K01Rik|4930511P15Rik|N-HSST 3|NDST-3	N-deacetylase/N-sulfotransferase (heparan glucosaminyl) 3	protein-coding
9413	chr17	29281604	29282107	+	6.25	7.19	2.76	4.42	1.09e-15	1.36e-14	0	NA	intron (NM_030561	intron 2 of 8)	PB1|SINE|Alu	13067	NM_030561	80748	Mm.290116	NM_030561	ENSMUSG00000052712	BC004004	2400006G15Rik	cDNA sequence BC004004	protein-coding
11816	chr19	17286911	17287418	+	6.16	7.09	2.67	4.42	5.44e-14	5.4e-13	0	NA	Intergenic	Intergenic	52341	NM_001136484	14537	Mm.244825	NM_010265	ENSMUSG00000038843	Gcnt1	5630400D21Rik|B130048E03|C2 GlcNAcT|C2GNT|IGnT	glucosaminyl (N-acetyl) transferase 1	core 2	protein-coding
18041	chr1	71609909	71610311	+	5.59	6.52	2.1	4.42	5.36e-11	3.48e-10	0	NA	intron (NM_001276412	intron 26 of 44)	MTC|LTR|ERVL-MaLR	43124	NM_001276413	14268	Mm.193099	NM_010233	ENSMUSG00000026193	Fn1	E330027I09|Fn|Fn-1	fibronectin 1	protein-coding
24162	chr5	8902440	8902830	+	5.18	6.11	1.69	4.42	3.73e-09	1.81e-08	0	NA	intron (NM_008830	intron 4 of 27)	intron (NM_008830	intron 4 of 27)	8914	NM_008830	18670	Mm.297825	NM_008830	ENSMUSG00000042476	Abcb4	Mdr2|Pgy-2|Pgy2|mdr-2	ATP-binding cassette	sub-family B (MDR/TAP)	member 4	protein-coding
25321	chr9	99169110	99169368	+	5.12	6.05	1.64	4.42	7.07e-09	3.28e-08	0	NA	Intergenic	Intergenic	-29028	NM_029094	74769	Mm.213128	NM_029094	ENSMUSG00000032462	Pik3cb	1110001J02Rik|AI447572|p110beta	phosphatidylinositol-4	5-bisphosphate 3-kinase catalytic subunit beta	protein-coding
32821	chr3	83050711	83050976	+	4.77	5.7	1.28	4.42	2.35e-07	8.4e-07	0	NA	promoter-TSS (NM_181849)	promoter-TSS (NM_181849)	-980	NM_181849	110135	Mm.30063	NM_181849	ENSMUSG00000033831	Fgb	2510049G14Rik	fibrinogen beta chain	protein-coding
34101	chr12	81130678	81131665	+	7.85	8.79	4.37	4.42	3.88e-07	1.33e-06	0	NA	intron (NM_001146217	intron 3 of 12)	intron (NM_001146217	intron 3 of 12)	-34980	NR_037227	100526532		NR_037227	ENSMUSG00000092673	Mir3067	mir-3067|mmu-mir-3067	microRNA 3067	ncRNA
53974	chrX	70883466	70883947	+	6.29	7.22	2.8	4.42	9.33e-05	0.000203	0.000203	NA	Intergenic	Intergenic	-166550	NM_001256048	333639	Mm.371730	NM_001081354	ENSMUSG00000059401	Mamld1	G630014P10Rik	mastermind-like domain containing 1	protein-coding
19	chr9	62559602	62560804	+	9.3	10.23	5.82	4.41	4.29e-91	2.65e-87	0	NA	Intergenic	Intergenic	-23159	NM_175484	235431	Mm.335229	NM_175484	ENSMUSG00000041729	Coro2b	CLIPINC|E130012P22Rik	coronin	actin binding protein	2B	protein-coding
858	chr9	69467201	69468338	+	8.02	8.96	4.55	4.41	6.27e-39	8.57e-37	0	NA	intron (NM_007585	intron 3 of 12)	intron (NM_007585	intron 3 of 12)	10825	NR_037296	100526560		NR_037296	ENSMUSG00000093042	Mir3109	mir-3109|mmu-mir-3109	microRNA 3109	ncRNA
1512	chrX	142897270	142898995	+	7.74	8.67	4.26	4.41	2.5e-32	1.94e-30	0	NA	intron (NM_019496	intron 2 of 5)	intron (NM_019496	intron 2 of 5)	68596	NM_019496	56068	Mm.143724	NM_019496	ENSMUSG00000042225	Ammecr1	6230420G18Rik	Alport syndrome	mental retardation	midface hypoplasia and elliptocytosis chromosomal region gene 1	protein-coding
1626	chr13	38736153	38736976	+	7.66	8.6	4.18	4.41	1.5e-31	1.08e-29	0	NA	Intergenic	Intergenic	-77536	NM_025380	66143	Mm.490319	NM_025380	ENSMUSG00000001707	Eef1e1	1110003A02Rik	eukaryotic translation elongation factor 1 epsilon 1	protein-coding
2468	chr15	33906834	33907540	+	7.31	8.24	3.84	4.41	2.58e-27	1.22e-25	0	NA	Intergenic	Intergenic	-175532	NM_001357925	67154	Mm.130883	NM_026002	ENSMUSG00000022255	Mtdh	2610103J23Rik|3D3|3D3/Lyric|AEG-1|AV353288|D8Bwg1112e|Lyric	metadherin	protein-coding
2745	chr7	111880088	111881060	+	7.56	8.5	4.08	4.41	2.6e-26	1.11e-24	0	NA	Intergenic	Intergenic	-100597	NM_001360903	233733	Mm.323322	NM_173739	ENSMUSG00000038296	Galnt18	2900011G21Rik|BC024988|Galntl4|galNAc-T18|mpp-GalNAc-T18(O18)	polypeptide N-acetylgalactosaminyltransferase 18	protein-coding
2773	chr14	63148410	63149068	+	7.24	8.17	3.76	4.41	3.04e-26	1.29e-24	0	NA	intron (NM_001360211	intron 7 of 7)	ORR1F|LTR|ERVL-MaLR	26277	NM_007798	13030	Mm.236553	NM_007798	ENSMUSG00000021939	Ctsb	CB	cathepsin B	protein-coding
4056	chr3	19450946	19451357	+	6.92	7.86	3.44	4.41	1.17e-22	3.37e-21	0	NA	Intergenic	MLT1H|LTR|ERVL-MaLR	-57444	NM_001163536	66326	Mm.45615	NM_025489	ENSMUSG00000027606	Dnajc5b	1700008A05Rik	DnaJ heat shock protein family (Hsp40) member C5 beta	protein-coding
7749	chr1	71909552	71910079	+	6.4	7.34	2.92	4.41	2.87e-17	4.33e-16	0	NA	Intergenic	Intergenic	21703	NR_027659	667931	Mm.214128	NR_027658	ENSMUSG00000099707	Gm8883	EG667931|Gm554	predicted gene 8883	ncRNA
10573	chr18	61020870	61021251	+	6.37	7.3	2.89	4.41	8.13e-15	9.02e-14	0	NA	intron (NM_009880	intron 1 of 2)	intron (NM_009880	intron 1 of 2)	-6861	NM_201353	240332	Mm.39846	NM_201353	ENSMUSG00000052026	Slc6a7	AW455934|PROT	solute carrier family 6 (neurotransmitter transporter	L-proline)	member 7	protein-coding
13868	chr2	118961551	118961868	+	5.73	6.67	2.25	4.41	8.48e-13	7.17e-12	0	NA	Intergenic	Intergenic	35212	NM_028117	72136	Mm.486238	NM_028117	ENSMUSG00000074916	Chst14	2600016L03Rik|D4ST-1|D4st1	carbohydrate (N-acetylgalactosamine 4-0) sulfotransferase 14	protein-coding
15036	chrX	99567745	99568147	+	5.82	6.75	2.34	4.41	3.06e-12	2.39e-11	0	NA	Intergenic	Intergenic	-97211	NM_001290556	18744	Mm.8211	NM_008853	ENSMUSG00000034403	Pja1	praja-1	praja ring finger ubiquitin ligase 1	protein-coding
15986	chr5	66046345	66046760	+	5.82	6.75	2.34	4.41	8.18e-12	6e-11	0	NA	intron (NM_139065	intron 2 of 6)	intron (NM_139065	intron 2 of 6)	-42267	NR_027961	231253	Mm.436542	NM_177679	ENSMUSG00000054598	9130230L23Rik	-	RIKEN cDNA 9130230L23 gene	ncRNA
20873	chr4	9110416	9110698	+	5.43	6.36	1.95	4.41	4.68e-10	2.63e-09	0	NA	Intergenic	L1MB2|LINE|L1	-158736	NM_001355183	74438	Mm.473368	NM_028940	ENSMUSG00000041216	Clvs1	4933402J24Rik|Clvl1|Rlbp1l1	clavesin 1	protein-coding
21119	chr1	67202232	67202785	+	5.94	6.88	2.47	4.41	5.48e-10	3.04e-09	0	NA	intron (NM_001080809	intron 25 of 37)	intron (NM_001080809	intron 25 of 37)	79481	NM_001080809	227231	Mm.343942	NM_001080809	ENSMUSG00000025991	Cps1	4732433M03Rik|CPS|D1Ucla3	carbamoyl-phosphate synthetase 1	protein-coding
736	chr3	145892100	145893191	+	8.09	9.02	4.62	4.4	2.12e-40	3.38e-38	0	NA	3' UTR (NM_026993	exon 6 of 6)	3' UTR (NM_026993	exon 6 of 6)	-31617	NM_009740	12042	Mm.239141	NM_009740	ENSMUSG00000028191	Bcl10	AI132454|BCL-10|C81403|CARMEN|CIPER|CLAP|ME10|cE10	B cell leukemia/lymphoma 10	protein-coding
861	chr12	52493213	52494088	+	8.06	8.99	4.59	4.4	6.93e-39	9.44e-37	0	NA	Intergenic	Intergenic	-13041	NR_136881	102638611	Mm.363799	NR_136881	ENSMUSG00000111982	Gm35135	-	predicted gene	35135	ncRNA
3477	chr3	115866937	115867707	+	7.4	8.34	3.93	4.4	4.32e-24	1.46e-22	0	NA	Intergenic	Intergenic	20737	NR_027894	68161	Mm.392043	NR_015487	ENSMUSG00000054426	A930005H10Rik	-	RIKEN cDNA A930005H10 gene	ncRNA
4140	chr12	69811896	69812415	+	6.91	7.84	3.44	4.4	1.85e-22	5.25e-21	0	NA	intron (NM_201519	intron 27 of 30)	intron (NM_201519	intron 27 of 30)	-21448	NM_183294	71091	Mm.132325	NM_183294	ENSMUSG00000020990	Cdkl1	4933411O17Rik	cyclin-dependent kinase-like 1 (CDC2-related kinase)	protein-coding
4845	chr3	69536078	69536852	+	7.32	8.25	3.86	4.4	4.02e-21	9.72e-20	0	NA	intron (NM_178726	intron 2 of 3)	intron (NM_178726	intron 2 of 3)	62495	NM_020026	26879	Mm.153710	NM_020026	ENSMUSG00000043300	B3galnt1	B3galt3|b3GT3	UDP-GalNAc:betaGlcNAc beta 1	3-galactosaminyltransferase	polypeptide 1	protein-coding
4934	chr13	49300576	49301232	+	6.73	7.66	3.26	4.4	5.81e-21	1.38e-19	0	NA	intron (NM_015759	intron 1 of 17)	intron (NM_015759	intron 1 of 17)	8304	NM_015759	30938	Mm.291089	NM_015759	ENSMUSG00000037946	Fgd3	5830461L01Rik|ZFYVE5	FYVE	RhoGEF and PH domain containing 3	protein-coding
8064	chr12	100670507	100671035	+	6.53	7.46	3.06	4.4	6.29e-17	9.14e-16	0	NA	intron (NM_153587	intron 2 of 17)	Lx5c|LINE|L1	54349	NM_153587	73086	Mm.220417	NM_153587	ENSMUSG00000021180	Rps6ka5	3110005L17Rik|6330404E13Rik|AI854034|MSK1|MSPK1|RLPK|RLSK|S6K-alpha-5	ribosomal protein S6 kinase	polypeptide 5	protein-coding
8450	chr10	4282209	4282728	+	6.52	7.45	3.05	4.4	1.57e-16	2.18e-15	0	NA	intron (NM_031185	intron 1 of 3)	intron (NM_031185	intron 1 of 3)	16139	NM_031185	83397	Mm.27481	NM_031185	ENSMUSG00000038587	Akap12	AI317366|SSeCKS|Srcs5|Tsga12	A kinase (PRKA) anchor protein (gravin) 12	protein-coding
10953	chr4	41000138	41000597	+	6.03	6.96	2.57	4.4	1.48e-14	1.58e-13	0	NA	intron (NM_001290448	intron 11 of 15)	intron (NM_001290448	intron 11 of 15)	6672	NR_037277	100526501		NR_037277	ENSMUSG00000092862	Mir3094	mir-3094|mmu-mir-3094	microRNA 3094	ncRNA
11497	chr16	90821018	90821503	+	6.04	6.97	2.57	4.4	3.33e-14	3.4e-13	0	NA	Intergenic	MER119|DNA|hAT-Charlie	-5459	NM_001316760	70967	Mm.253077	NM_027627	ENSMUSG00000039903	Eva1c	1700092M14Rik|4931408A02Rik|Fam176c	eva-1 homolog C (C. elegans)	protein-coding
13966	chr11	70191242	70191531	+	6.08	7.02	2.62	4.4	9.51e-13	7.98e-12	0	NA	Intergenic	Intergenic	-22524	NM_153081	216867	Mm.289238	NM_153081	ENSMUSG00000040938	Slc16a11	AB041591|MCT 11|MNCb-2717	solute carrier family 16 (monocarboxylic acid transporters)	member 11	protein-coding
14002	chr1	72079589	72079961	+	6.08	7.01	2.61	4.4	9.92e-13	8.31e-12	0	NA	Intergenic	B4|SINE|B4	-74580	NR_040454	71134	Mm.370574	NR_040454	ENSMUSG00000101848	4933417E11Rik	-	RIKEN cDNA 4933417E11 gene	ncRNA
14562	chr13	90993015	90993293	+	5.91	6.84	2.45	4.4	1.83e-12	1.48e-11	0	NA	intron (NM_025770	intron 5 of 7)	intron (NM_025770	intron 5 of 7)	70032	NM_024175	66475	Mm.306302	NM_024175	ENSMUSG00000049517	Rps23	2410044J15Rik	ribosomal protein S23	protein-coding
18887	chr16	23631181	23631771	+	5.72	6.65	2.25	4.4	1.08e-10	6.69e-10	0	NA	Intergenic	Intergenic	21557	NM_023386	67775	Mm.475107	NM_023386	ENSMUSG00000033355	Rtp4	5830458K16Rik|Ifrg28	receptor transporter protein 4	protein-coding
23314	chr4	111428813	111429220	+	5.27	6.2	1.8	4.4	2.26e-09	1.14e-08	0	NA	intron (NR_033793	intron 1 of 5)	intron (NR_033793	intron 1 of 5)	14010	NR_033793	67621	Mm.45533	NM_026279	ENSMUSG00000028545	Bend5	2310026E23Rik	BEN domain containing 5	protein-coding
27624	chr9	41365257	41365602	+	4.94	5.88	1.48	4.4	2.35e-08	9.95e-08	0	NA	Intergenic	Intergenic	-11097	NR_131928	73144	Mm.38166	NM_001033153	ENSMUSG00000074415	3110039I08Rik	2610203C20Rik|AI848448|D230004N17Rik|D3Mgi9|Mir100hg	RIKEN cDNA 3110039I08 gene	ncRNA
28382	chr9	123463101	123463244	+	5.12	6.05	1.65	4.4	3.35e-08	1.38e-07	0	NA	TTS (NM_001348167)	TTS (NM_001348167)	-15529	NM_013860	29806	Mm.10987	NM_013860	ENSMUSG00000025239	Limd1	AW822033|D9Ertd192e	LIM domains containing 1	protein-coding
33416	chrX	13413120	13413462	+	4.77	5.71	1.3	4.4	2.95e-07	1.04e-06	0	NA	Intergenic	MERVL_2A-int|LTR|ERVL	-54381	NM_173415	236690	Mm.90233	NM_173415	ENSMUSG00000051228	Nyx	CLNP|CSNB1|CSNB4|nob	nyctalopin	protein-coding
36826	chr6	118390860	118391053	+	4.46	5.39	0.99	4.4	1.03e-06	3.27e-06	0	NA	intron (NM_194339	intron 19 of 22)	intron (NM_194339	intron 19 of 22)	28461	NM_194339	213895	Mm.25269	NM_194339	ENSMUSG00000030138	Bms1	AA408648|AU020092|AU043373|BB007109|BC030906|Bms1l|mKIAA0187	BMS1	ribosome biogenesis factor	protein-coding
46	chr15	59822662	59823758	+	9.02	9.95	5.56	4.39	3.54e-77	9.03e-74	0	NA	Intergenic	Intergenic	-28251	NR_045076	100503021	Mm.402924	NR_045076	ENSMUSG00000115426	Gm19510	-	predicted gene	19510	ncRNA
176	chr12	84846404	84848200	+	8.73	9.66	5.28	4.39	1.96e-58	1.31e-55	0	NA	intron (NM_013589	intron 3 of 34)	(TG)n|Simple_repeat|Simple_repeat	-28500	NR_028577	100303738	Mm.479389	NR_028577	ENSMUSG00000092130	D030025P21Rik	-	RIKEN cDNA D030025P21 gene	ncRNA
320	chr15	62118462	62119879	+	8.53	9.46	5.07	4.39	1.46e-50	5.34e-48	0	NA	intron (NR_132746	intron 2 of 6)	intron (NR_132746	intron 2 of 6)	79913	NR_132746	19296	Mm.4608	NM_011222	ENSMUSG00000097039	Pvt1	Ayu21-84Imeg|Gt(pU21)84Imeg|Mis-1|Mlvi-1|Pvt-1	Pvt1 oncogene	ncRNA
1181	chr10	24388095	24388815	+	7.74	8.67	4.29	4.39	5.19e-35	5.16e-33	0	NA	Intergenic	Intergenic	164938	NM_021509	59012	Mm.285934	NM_021509	ENSMUSG00000020000	Moxd1	3230402N08Rik|MNCb-5203	monooxygenase	DBH-like 1	protein-coding
1358	chr12	41949523	41950417	+	7.9	8.84	4.45	4.39	1.58e-33	1.36e-31	0	NA	intron (NM_053122	intron 6 of 6)	intron (NM_053122	intron 6 of 6)	-463913	NM_001271708	16981	Mm.404786	NM_010733	ENSMUSG00000036295	Lrrn3	NLRR-3	leucine rich repeat protein 3	neuronal	protein-coding
2663	chr11	113026833	113027545	+	7.44	8.37	3.98	4.39	1.44e-26	6.32e-25	0	NA	Intergenic	Intergenic	174649	NR_015556	72386	Mm.266961	NR_015556	ENSMUSG00000087259	2610035D17Rik	-	RIKEN cDNA 2610035D17 gene	ncRNA
2727	chr12	91305596	91306191	+	7.22	8.15	3.76	4.39	2.36e-26	1.02e-24	0	NA	intron (NM_181815	intron 10 of 25)	intron (NM_181815	intron 10 of 25)	78516	NM_181815	75216	Mm.312204	NM_181815	ENSMUSG00000061533	Cep128	4930534B04Rik|5430424K18Rik|AI449708|AI480494|E230024F20	centrosomal protein 128	protein-coding
2757	chr15	11107171	11107996	+	7.43	8.37	3.98	4.39	2.77e-26	1.18e-24	0	NA	intron (NM_175501	intron 2 of 23)	intron (NM_175501	intron 2 of 23)	42810	NM_175501	239337	Mm.224825	NM_175501	ENSMUSG00000047497	Adamts12	ADAMTS-12|AI605170	a disintegrin-like and metallopeptidase (reprolysin type) with thrombospondin type 1 motif	12	protein-coding
2936	chr4	22420462	22421171	+	7.25	8.18	3.79	4.39	1.03e-25	4.12e-24	0	NA	intron (NM_172988	intron 6 of 8)	intron (NM_172988	intron 6 of 8)	63273	NR_104380	269514	Mm.40708	NM_172988	ENSMUSG00000040410	Fbxl4	AI836810|FBL4|FBL5	F-box and leucine-rich repeat protein 4	protein-coding
3501	chr16	5139632	5140142	+	7.43	8.36	3.97	4.39	5.06e-24	1.69e-22	0	NA	Intergenic	Intergenic	-7222	NM_001127725	665119	Mm.102072	NM_001127725	ENSMUSG00000091712	Sec14l5	-	SEC14-like lipid binding 5	protein-coding
3612	chr1	75040386	75040870	+	7.07	8	3.62	4.39	8.91e-24	2.89e-22	0	NA	intron (NM_029342	intron 2 of 4)	intron (NM_029342	intron 2 of 4)	6011	NM_029342	75570	Mm.442409	NM_029342	ENSMUSG00000026162	Nhej1	1700029B21Rik|XLF|cernunnos	nonhomologous end-joining factor 1	protein-coding
5600	chr17	24610718	24611334	+	6.66	7.59	3.2	4.39	6.36e-20	1.33e-18	0	NA	intron (NM_001039363	intron 20 of 39)	ORR1B2|LTR|ERVL-MaLR	21601	NM_001286714	22084	Mm.30435	NM_011647	ENSMUSG00000002496	Tsc2	Nafld|Tcs2	tuberous sclerosis 2	protein-coding
9452	chr2	113640558	113641313	+	6.24	7.17	2.78	4.39	1.16e-15	1.44e-14	0	NA	intron (NM_001285459	intron 13 of 16)	intron (NM_001285459	intron 13 of 16)	-44155	NM_001287818	14260	Mm.4938	NM_010230	ENSMUSG00000044042	Fmn1	Fmn|formin-1|ld	formin 1	protein-coding
9538	chr17	80765273	80765672	+	6.24	7.17	2.78	4.39	1.37e-15	1.69e-14	0	NA	Intergenic	Intergenic	-37447	NM_001360278	225028	Mm.311948	NM_001081357	ENSMUSG00000024242	Map4k3	4833416M01Rik|4833416M07Rik|9530052P13Rik|Glk|MAPKKKK3|MEKKK 3|MEKKK3|RAB8IPL1	mitogen-activated protein kinase kinase kinase kinase 3	protein-coding
10399	chr9	77744800	77745203	+	6.05	6.98	2.59	4.39	6.14e-15	6.93e-14	0	NA	Intergenic	Intergenic	-9534	NM_010295	14629	Mm.89888	NM_010295	ENSMUSG00000032350	Gclc	D9Wsu168e|GLCL-H|Ggcs-hs|Glclc	glutamate-cysteine ligase	catalytic subunit	protein-coding
10649	chr13	112227770	112228243	+	6.42	7.35	2.97	4.39	9.21e-15	1.01e-13	0	NA	Intergenic	Intergenic	-60445	NM_001168405	77318	Mm.159895	NM_029898	ENSMUSG00000049985	Ankrd55	C030011J08Rik	ankyrin repeat domain 55	protein-coding
11845	chr16	22296974	22297419	+	6.07	7.01	2.61	4.39	5.69e-14	5.63e-13	0	NA	Intergenic	Intergenic	2208	NR_153764	100043507		NR_153764		Gng5-ps	Gm15776	G protein subunit gamma 5	pseudogene	pseudo
12858	chr10	23569454	23569830	+	5.85	6.79	2.39	4.39	2.46e-13	2.24e-12	0	NA	Intergenic	Intergenic	215809	NR_037680	100529074	Mm.371846	NR_037680	ENSMUSG00000070063	Snora33	ACA33|MBI-42	small nucleolar RNA	H/ACA box 33	snoRNA
14665	chrX	11098359	11098688	+	5.71	6.64	2.24	4.39	2.03e-12	1.63e-11	0	NA	Intergenic	Intergenic	-200734	NM_001111037	100042922	Mm.374311	NM_001111037	ENSMUSG00000100626	H2al1a	Gm14483|H2A.L.1|H2AL1|H2al1c|H2al1d|H2al1f|H2al1g|H2al1h|H2al1i	H2A histone family member L1A	protein-coding
22896	chr12	76500924	76501225	+	5.14	6.07	1.68	4.39	1.77e-09	9.08e-09	0	NA	Intergenic	ORR1C2|LTR|ERVL-MaLR	32138	NR_039597	100628604		NR_039597	ENSMUSG00000092738	Mir5135	mir-5135|mmu-mir-5135|mu-mir-5135	microRNA 5135	ncRNA
28151	chr2	115126413	115126724	+	4.93	5.87	1.48	4.39	3.04e-08	1.26e-07	0	NA	Intergenic	Intergenic	217712	NR_040516	78193	Mm.189508	NR_040516	ENSMUSG00000087309	4930528P14Rik	-	RIKEN cDNA 4930528P14 gene	ncRNA
31703	chr19	34562601	34562962	+	4.76	5.69	1.3	4.39	1.48e-07	5.48e-07	0	NA	intron (NM_001355262	intron 1 of 2)	intron (NM_001355262	intron 1 of 2)	11693	NM_001355262	15958	Mm.2036	NM_008332	ENSMUSG00000045932	Ifit2	AV302338|Ifi54|P54	interferon-induced protein with tetratricopeptide repeats 2	protein-coding
33225	chrX	36762892	36763242	+	4.68	5.61	1.23	4.39	2.77e-07	9.77e-07	0	NA	intron (NR_075096	intron 4 of 5)	intron (NR_075096	intron 4 of 5)	19435	NR_075097	194744	Mm.336014	NM_001085497	ENSMUSG00000037636	Slc25a43	Gm8	solute carrier family 25	member 43	protein-coding
38133	chrX	77067334	77067682	+	4.9	5.83	1.45	4.39	1.6e-06	4.91e-06	0	NA	Intergenic	Intergenic	-443719	NM_020601	21372	Mm.258476	NM_020601	ENSMUSG00000025246	Tbl1x	5330429M20|Tbl1	transducin (beta)-like 1 X-linked	protein-coding
44441	chr4	129443866	129444073	+	4.16	5.09	0.71	4.39	1e-05	2.65e-05	0	NA	Intergenic	RLTR1C|LTR|ERV1	-3151	NM_153541	215627	Mm.428660	NM_153541	ENSMUSG00000048485	Zbtb8b	AV220464|BC023839|BOZF1|Zbtb8	zinc finger and BTB domain containing 8b	protein-coding
44577	chr3	126463222	126463418	+	4.17	5.1	0.71	4.39	1.04e-05	2.74e-05	0	NA	Intergenic	Intergenic	99468	NM_173451	271970	Mm.317021	NM_173451	ENSMUSG00000046561	Arsj	9330196J05Rik|D830047F08	arylsulfatase J	protein-coding
69899	chr7	36667701	36668123	+	6.84	7.77	3.38	4.39	0.00178	0.00298	0.00298	NA	Intergenic	Intergenic	-30206	NM_172298	243931	Mm.44141	NM_172298	ENSMUSG00000021217	Tshz3	A630038G13Rik|Tsh3|Zfp537|mKIAA1474|teashirt3	teashirt zinc finger family member 3	protein-coding
170	chr1	183320481	183321774	+	8.69	9.63	5.25	4.38	5.35e-59	3.69e-56	0	NA	intron (NM_181732	intron 8 of 9)	intron (NM_181732	intron 8 of 9)	-23834	NR_151660	71678	Mm.392270	NM_027861	ENSMUSG00000046836	Brox	0610010K06Rik	BRO1 domain and CAAX motif containing	protein-coding
777	chr2	83744262	83745139	+	8.09	9.02	4.64	4.38	7.21e-40	1.09e-37	0	NA	intron (NM_008402	intron 2 of 29)	intron (NM_008402	intron 2 of 29)	20303	NM_008402	16410	Mm.227	NM_008402	ENSMUSG00000027087	Itgav	1110004F14Rik|2610028E01Rik|CD51|D430040G12Rik	integrin alpha V	protein-coding
1270	chr4	127351915	127353028	+	8.02	8.95	4.57	4.38	2.77e-34	2.56e-32	0	NA	5' UTR (NM_008127	exon 2 of 2)	5' UTR (NM_008127	exon 2 of 2)	1610	NM_008127	14621	Mm.56906	NM_008127	ENSMUSG00000046623	Gjb4	Cnx30.3|Cx30.3|Gjb-4	gap junction protein	beta 4	protein-coding
1720	chr1	136613139	136614028	+	7.78	8.71	4.33	4.38	5.52e-31	3.76e-29	0	NA	Intergenic	Intergenic	-11318	NM_177643	226442	Mm.62521	NM_177643	ENSMUSG00000041483	Zfp281	Znf281	zinc finger protein 281	protein-coding
2291	chr19	36133522	36134279	+	7.44	8.37	3.99	4.38	5.35e-28	2.74e-26	0	NA	Intergenic	Intergenic	-14056	NM_013468	107765	Mm.10279	NM_013468	ENSMUSG00000024803	Ankrd1	Alrp|CARP|Crap|MARP1	ankyrin repeat domain 1 (cardiac muscle)	protein-coding
2302	chr2	22723988	22724676	+	7.41	8.35	3.96	4.38	5.79e-28	2.95e-26	0	NA	Intergenic	Lx8|LINE|L1	-49995	NM_019456	54519	Mm.14255	NM_019456	ENSMUSG00000026786	Apbb1ip	9930118P07Rik|Prp48	amyloid beta (A4) precursor protein-binding	family B	member 1 interacting protein	protein-coding
4015	chr1	183921145	183921880	+	7.02	7.95	3.57	4.38	8.93e-23	2.61e-21	0	NA	Intergenic	Intergenic	112486	NM_028516	73363	Mm.50115	NM_028516	ENSMUSG00000044854	1700056E22Rik	-	RIKEN cDNA 1700056E22 gene	protein-coding
4402	chr12	51952366	51952853	+	7	7.94	3.55	4.38	6.11e-22	1.62e-20	0	NA	exon (NM_177171	exon 7 of 36)	exon (NM_177171	exon 7 of 36)	18712	NM_177171	320487	Mm.131941	NM_177171	ENSMUSG00000035181	Heatr5a	C230081H03Rik|D930036F22Rik|mKIAA1316	HEAT repeat containing 5A	protein-coding
4594	chr15	39122414	39122873	+	6.95	7.89	3.51	4.38	1.4e-21	3.57e-20	0	NA	intron (NM_198606	intron 3 of 10)	B3A|SINE|B2	9769	NM_198606	223499	Mm.321937	NM_198606	ENSMUSG00000022300	Dcaf13	Gm83|Wdsof1	DDB1 and CUL4 associated factor 13	protein-coding
5014	chr18	63495776	63496549	+	6.82	7.75	3.37	4.38	8.01e-21	1.87e-19	0	NA	Intergenic	Intergenic	-108979	NM_001039485	667742	Mm.158720	NM_172629	ENSMUSG00000041482	Piezo2	5930434P17|9030411M15Rik|9430028L06Rik|Fam38b|Fam38b2	piezo-type mechanosensitive ion channel component 2	protein-coding
5135	chr15	101455191	101455838	+	7.03	7.96	3.58	4.38	1.32e-20	3.01e-19	0	NA	intron (NM_016879	intron 7 of 9)	intron (NM_016879	intron 7 of 9)	7769	NM_025487	66322	Mm.158111	NM_025487	ENSMUSG00000063971	Krt88	1700011A15Rik	keratin 88	protein-coding
5745	chr8	106518754	106519235	+	6.7	7.63	3.25	4.38	1.05e-19	2.15e-18	0	NA	intron (NM_007665	intron 2 of 15)	intron (NM_007665	intron 2 of 15)	8142	NM_007665	12560	Mm.4658	NM_007665	ENSMUSG00000061048	Cdh3	AI385538|Cadp|Cdhp|P-cadherin|Pcad	cadherin 3	protein-coding
10950	chr11	53264220	53264793	+	6.02	6.95	2.57	4.38	1.47e-14	1.58e-13	0	NA	intron (NM_008300	intron 16 of 18)	intron (NM_008300	intron 16 of 18)	35973	NM_008300	15525	Mm.239865	NM_008300	ENSMUSG00000020361	Hspa4	70kDa|AI317151|APG-2|Hsp110|Hsp70RY|mKIAA4025	heat shock protein 4	protein-coding
16868	chr10	39600899	39601396	+	5.61	6.55	2.16	4.38	1.93e-11	1.34e-10	0	NA	intron (NR_152260	intron 2 of 2)	ORR1E|LTR|ERVL-MaLR	-11787	NM_134000	103213	Mm.436686	NM_134000	ENSMUSG00000019842	Traf3ip2	AI429613|Act1|CIKS	TRAF3 interacting protein 2	protein-coding
18230	chrX	93563891	93564394	+	5.44	6.37	1.99	4.38	6.23e-11	4.01e-10	0	NA	intron (NM_008892	intron 24 of 36)	intron (NM_008892	intron 24 of 36)	68013	NM_008892	18968	Mm.1923	NM_008892	ENSMUSG00000006678	Pola1	AW321876|Pola	polymerase (DNA directed)	alpha 1	protein-coding
26441	chr19	29653926	29654199	+	5.08	6.01	1.64	4.38	1.27e-08	5.64e-08	0	NA	Intergenic	ID_B1|SINE|B4	-5647	NM_001362131	226090	Mm.267131	NM_001081213	ENSMUSG00000046324	Ermp1	D19Ertd410e|D19Wsu12e|Fxna|b2b2633Clo|mKIAA1815	endoplasmic reticulum metallopeptidase 1	protein-coding
29344	chrX	94022660	94022915	+	4.89	5.82	1.45	4.38	5.32e-08	2.12e-07	0	NA	Intergenic	Intergenic	54131	NR_028320	385493	Mm.328014	NM_001033480	ENSMUSG00000081044	AU015836	-	expressed sequence AU015836	ncRNA
31698	chr10	91094313	91094543	+	4.71	5.64	1.26	4.38	1.48e-07	5.48e-07	0	NA	intron (NM_027078	intron 2 of 2)	B2_Mm2|SINE|B2	11389	NM_026166	67454	Mm.252843	NM_026166	ENSMUSG00000019975	Ikbip	1200009F10Rik|1700023M03Rik|D18354|Ikip	IKBKB interacting protein	protein-coding
36234	chr3	10417950	10418151	+	4.75	5.69	1.3	4.38	8.45e-07	2.73e-06	0	NA	3' UTR (NM_029068	exon 8 of 8)	3' UTR (NM_029068	exon 8 of 8)	22080	NM_029068	74718	Mm.440548	NM_029068	ENSMUSG00000027534	Snx16	4930522N22Rik|AI117577|AI747675	sorting nexin 16	protein-coding
331	chr19	58104274	58105080	+	8.51	9.44	5.08	4.37	3.72e-50	1.31e-47	0	NA	intron (NM_181415	intron 28 of 28)	intron (NM_181415	intron 28 of 28)	53510	NR_049196	100885835		NR_049196	ENSMUSG00000093757	Mir5623	Gm26068|mir-5623|mmu-mir-5623	microRNA 5623	ncRNA
555	chr17	73262936	73263639	+	8.15	9.08	4.72	4.37	1.02e-43	2.15e-41	0	NA	Intergenic	Intergenic	136009	NM_001033444	381122	Mm.81496	NM_001033444	ENSMUSG00000043705	Capn13	CANP 13|Gm943	calpain 13	protein-coding
1306	chr11	75355165	75356024	+	7.68	8.61	4.23	4.37	5.82e-34	5.23e-32	0	NA	intron (NM_001102611	intron 2 of 10)	MTE-int|LTR|ERVL-MaLR	7161	NM_001102611	319822	Mm.340377	NM_177009	ENSMUSG00000018809	Smyd4	G430029E23Rik	SET and MYND domain containing 4	protein-coding
1653	chr9	69439710	69440361	+	7.98	8.91	4.54	4.37	2.06e-31	1.46e-29	0	NA	Intergenic	Intergenic	-13648	NM_007585	12306	Mm.238343	NM_007585	ENSMUSG00000032231	Anxa2	AW215814|Cal1h	annexin A2	protein-coding
2600	chr2	101986032	101987030	+	7.49	8.42	4.05	4.37	8.53e-27	3.85e-25	0	NA	intron (NM_178886	intron 4 of 5)	Lx5b|LINE|L1	100269	NM_029635	76501	Mm.330424	NM_029635	ENSMUSG00000027163	Commd9	1810029F08Rik|AA409293	COMM domain containing 9	protein-coding
3312	chr12	101792980	101793986	+	7.37	8.3	3.94	4.37	1.4e-24	4.97e-23	0	NA	intron (NM_001361987	intron 4 of 10)	intron (NM_001361987	intron 4 of 10)	25001	NM_001361987	23876	Mm.288381	NM_011812	ENSMUSG00000021186	Fbln5	A55|DANCE|EVEC	fibulin 5	protein-coding
3648	chr15	56844182	56844964	+	7.12	8.05	3.68	4.37	1.09e-23	3.51e-22	0	NA	Intergenic	Intergenic	-150027	NM_008216	15117	Mm.5148	NM_008216	ENSMUSG00000022367	Has2	-	hyaluronan synthase 2	protein-coding
3809	chr13	104015300	104016392	+	7.11	8.04	3.67	4.37	2.63e-23	8.09e-22	0	NA	Intergenic	Intergenic	93768	NM_029447	75805	Mm.127692	NM_029447	ENSMUSG00000021710	Nln	4930472G13Rik|C79345	neurolysin (metallopeptidase M3 family)	protein-coding
5875	chr2	130776395	130777040	+	6.97	7.9	3.53	4.37	1.61e-19	3.21e-18	0	NA	intron (NM_029432	intron 14 of 36)	intron (NM_029432	intron 14 of 36)	27384	NR_024097	100043766	Mm.447040	NR_024097		Gm14057	-	Ppp1r14c pseudogene	pseudo
6078	chr5	64193215	64193722	+	6.66	7.59	3.22	4.37	2.85e-19	5.49e-18	0	NA	intron (NM_019636	intron 2 of 19)	intron (NM_019636	intron 2 of 19)	33208	NM_001310611	57915	Mm.286353	NM_019636	ENSMUSG00000029174	Tbc1d1	1110062G02Rik|AI385682|AW555803|Nob1|Nobq1|Tbc1|mKIAA1108	TBC1 domain family	member 1	protein-coding
6518	chr10	39040099	39040621	+	6.85	7.78	3.41	4.37	1.05e-18	1.89e-17	0	NA	intron (NM_010681	intron 8 of 37)	MTC|LTR|ERVL-MaLR	74845	NM_010681	16775	Mm.258065	NM_010681	ENSMUSG00000019846	Lama4	-	laminin	alpha 4	protein-coding
6744	chr14	23084783	23085305	+	6.5	7.44	3.07	4.37	2e-18	3.48e-17	0	NA	intron (NR_033550	intron 2 of 3)	intron (NR_033550	intron 2 of 3)	9527	NR_033550	791307	Mm.364384	NR_033550	ENSMUSG00000068680	Gm10248	-	predicted gene 10248	ncRNA
7556	chr4	88994346	88994925	+	6.48	7.41	3.05	4.37	1.82e-17	2.82e-16	0	NA	Intergenic	Intergenic	-52593	NR_132734	106557447	Mm.484668	NR_132734		LOC106557447	-	uncharacterized LOC106557447	ncRNA
10107	chr2	22822318	22822707	+	6.3	7.23	2.86	4.37	3.81e-15	4.42e-14	0	NA	intron (NM_019456	intron 3 of 13)	intron (NM_019456	intron 3 of 13)	48185	NM_019456	54519	Mm.14255	NM_019456	ENSMUSG00000026786	Apbb1ip	9930118P07Rik|Prp48	amyloid beta (A4) precursor protein-binding	family B	member 1 interacting protein	protein-coding
10275	chr19	31252777	31253322	+	6.12	7.05	2.69	4.37	5.04e-15	5.75e-14	0	NA	intron (NM_001013833	intron 3 of 17)	intron (NM_001013833	intron 3 of 17)	-36653	NR_002849	78103	Mm.445198	NR_002849		8430431K14Rik	-	RIKEN cDNA 8430431K14 gene	ncRNA
11474	chr6	90983991	90984451	+	6.03	6.96	2.59	4.37	3.21e-14	3.28e-13	0	NA	Intergenic	Intergenic	132605	NM_018815	54563	Mm.28162	NM_018815	ENSMUSG00000030091	Nup210	9830001L10|AI836801|Pom210|gp190|gp210	nucleoporin 210	protein-coding
12072	chr6	135153703	135154097	+	6.08	7.01	2.64	4.37	8.02e-14	7.79e-13	0	NA	intron (NM_013546	intron 2 of 3)	ID4|SINE|ID	14315	NM_013546	15199	Mm.378937	NM_013546	ENSMUSG00000042770	Hebp1	Hebp|p22HBP	heme binding protein 1	protein-coding
12995	chr16	32831550	32831841	+	5.81	6.74	2.37	4.37	2.92e-13	2.64e-12	0	NA	intron (NM_172615	intron 10 of 18)	intron (NM_172615	intron 10 of 18)	-21249	NM_001256309	381043	Mm.303864	NM_001256309	ENSMUSG00000094430	Smbd1	Gm1743|Gm933	somatomedin B domain containing 1	protein-coding
14527	chr8	84381728	84382079	+	5.82	6.75	2.38	4.37	1.76e-12	1.42e-11	0	NA	Intergenic	Lx7|LINE|L1	-33461	NM_001252059	12286	Mm.334658	NM_007578	ENSMUSG00000034656	Cacna1a	APCA|BI|Caca1a|Cacnl1a4|Cav2.1|Ccha1a|EA2|FHM|HPCA|MHP|MHP1|SCA6|alpha1A|la|nmf352|rkr|smrl|tg	calcium channel	voltage-dependent	P/Q type	alpha 1A subunit	protein-coding
20366	chr7	129628597	129628890	+	5.29	6.22	1.85	4.37	3.24e-10	1.87e-09	0	NA	intron (NM_172255	intron 20 of 28)	intron (NM_172255	intron 20 of 28)	36880	NM_172255	207425	Mm.229323	NM_172255	ENSMUSG00000042055	Wdr11	2900055P10Rik|AW489876|Brwd2|mKIAA1351	WD repeat domain 11	protein-coding
23032	chrX	93825810	93826191	+	5.39	6.33	1.95	4.37	1.92e-09	9.75e-09	0	NA	intron (NM_145630	intron 1 of 11)	B1_Mus1|SINE|Alu	6095	NM_145630	236900	Mm.12775	NM_145630	ENSMUSG00000035232	Pdk3	2610001M10Rik|AI035637	pyruvate dehydrogenase kinase	isoenzyme 3	protein-coding
24856	chr2	134764422	134764895	+	5.13	6.07	1.69	4.37	5.49e-09	2.59e-08	0	NA	Intergenic	Intergenic	-21506	NM_001145830	18795	Mm.330607	NM_019677	ENSMUSG00000051177	Plcb1	3110043I21Rik|AI132408|Plcb|mKIAA0581	phospholipase C	beta 1	protein-coding
24944	chr3	56262250	56262520	+	5.13	6.06	1.69	4.37	5.76e-09	2.71e-08	0	NA	Intergenic	Intergenic	-78684	NM_030595	26422	Mm.384353	NM_030595	ENSMUSG00000027799	Nbea	Lyst2|mKIAA1544	neurobeachin	protein-coding
33703	chrX	103381611	103381880	+	4.67	5.6	1.23	4.37	3.28e-07	1.14e-06	0	NA	intron (NM_009767	intron 3 of 5)	intron (NM_009767	intron 3 of 5)	25269	NM_009767	12212	Mm.42223	NM_009767	ENSMUSG00000031327	Chic1	Brx|Gm10454	cysteine-rich hydrophobic domain 1	protein-coding
35133	chr11	86380329	86381059	+	7.7	8.63	4.26	4.37	5.69e-07	1.9e-06	0	NA	Intergenic	MLT1M|LTR|ERVL-MaLR	-23169	NM_001080931	327987	Mm.341886	NM_001080931	ENSMUSG00000034297	Med13	1110067M05Rik|D030023K18|Thrap1|Trap240	mediator complex subunit 13	protein-coding
77332	chrX	57935623	57936122	+	6.71	7.64	3.27	4.37	0.00583	0.00884	0.00884	NA	Intergenic	Intergenic	-94756	NM_009575	22773	Mm.255890	NM_009575	ENSMUSG00000067860	Zic3	Bn|Ka	zinc finger protein of the cerebellum 3	protein-coding
312	chr14	20345432	20346776	+	8.71	9.64	5.28	4.36	6.46e-51	2.43e-48	0	NA	intron (NM_027475	intron 2 of 13)	intron (NM_027475	intron 2 of 13)	2017	NM_027475	70601	Mm.35105	NM_027475	ENSMUSG00000021810	Ecd	5730461K03Rik|Hsgt1	ecdysoneless cell cycle regulator	protein-coding
372	chr2	33760162	33761451	+	8.35	9.28	4.92	4.36	1.75e-48	5.52e-46	0	NA	intron (NM_175184	intron 7 of 9)	MIRb|SINE|MIR	-45010	NR_045729	320482	Mm.442057	NR_045729	ENSMUSG00000086484	Nron	A630071L07Rik|Gm24353	non-protein coding RNA	repressor of NFAT	ncRNA
613	chr2	108236130	108237010	+	8.16	9.09	4.73	4.36	1.28e-42	2.45e-40	0	NA	Intergenic	Intergenic	945981	NM_021275	16492	Mm.142718	NM_021275	ENSMUSG00000042604	Kcna4	Kv1.4	potassium voltage-gated channel	shaker-related subfamily	member 4	protein-coding
1454	chr1	156069892	156070519	+	7.63	8.56	4.19	4.36	8.39e-33	6.76e-31	0	NA	Intergenic	Intergenic	29344	NM_001160181	240832	Mm.253335	NM_022329	ENSMUSG00000050565	Tor1aip2	1110020D10Rik|15kDa|A130072J07|AA103493|AW060462|AW610675|C77739|Ifrg15|Lull1	torsin A interacting protein 2	protein-coding
2849	chr16	52438086	52439260	+	7.25	8.18	3.82	4.36	5.43e-26	2.23e-24	0	NA	intron (NM_009655	intron 1 of 15)	intron (NM_009655	intron 1 of 15)	14408	NM_009655	11658	Mm.288282	NM_009655	ENSMUSG00000022636	Alcam	AI853494|BEN|CD166|DM-GRASP|MuSC|SC1	activated leukocyte cell adhesion molecule	protein-coding
3709	chr13	29903233	29903766	+	7.05	7.98	3.62	4.36	1.73e-23	5.46e-22	0	NA	Intergenic	ORR1E|LTR|ERVL-MaLR	-47826	NM_001308486	68916	Mm.212227	NM_144536	ENSMUSG00000006191	Cdkal1	1190005B03Rik|6620401C13Rik	CDK5 regulatory subunit associated protein 1-like 1	protein-coding
5481	chr12	83759441	83759959	+	6.89	7.82	3.46	4.36	4.42e-20	9.45e-19	0	NA	Intergenic	MTC|LTR|ERVL-MaLR	-3934	NM_001205343	170721	Mm.133443	NM_130887	ENSMUSG00000021223	Papln	E030033C16Rik	papilin	proteoglycan-like sulfated glycoprotein	protein-coding
6946	chr6	56745937	56746571	+	6.63	7.56	3.2	4.36	3.7e-18	6.24e-17	0	NA	intron (NM_030235	intron 12 of 15)	intron (NM_030235	intron 12 of 15)	31349	NM_030235	78937	Mm.105343	NM_030235	ENSMUSG00000029787	Avl9	5830411G16Rik|D730049P16Rik|mKIAA0241	AVL9 cell migration associated	protein-coding
16655	chr7	92795806	92796094	+	5.57	6.5	2.13	4.36	1.56e-11	1.1e-10	0	NA	intron (NM_029494	intron 1 of 4)	intron (NM_029494	intron 1 of 4)	54236	NM_029494	75985	Mm.323004	NM_029494	ENSMUSG00000030643	Rab30	5033421K01Rik|AI323892|Rsb30	RAB30	member RAS oncogene family	protein-coding
16838	chr7	92486223	92486625	+	5.66	6.59	2.24	4.36	1.86e-11	1.3e-10	0	NA	Intergenic	Eulor6B|DNA?|DNA?	-74725	NM_025515	66365	Mm.21173	NM_025515	ENSMUSG00000030613	Ccdc90b	2310015N07Rik|C86558	coiled-coil domain containing 90B	protein-coding
18666	chr5	64898877	64899196	+	5.42	6.35	1.99	4.36	9.1e-11	5.71e-10	0	NA	Intergenic	Intergenic	33663	NM_030682	21897	Mm.273024	NM_030682	ENSMUSG00000044827	Tlr1	-	toll-like receptor 1	protein-coding
29717	chrX	164330556	164330997	+	4.88	5.81	1.45	4.36	6.3e-08	2.48e-07	0	NA	intron (NM_001301402	intron 5 of 8)	intron (NM_001301402	intron 5 of 8)	-42746	NM_010216	14205	Mm.297978	NM_010216	ENSMUSG00000031380	Vegfd	AI325264|Figf|VEGF-D	vascular endothelial growth factor D	protein-coding
32675	chr12	73307844	73308054	+	4.68	5.61	1.24	4.36	2.21e-07	7.92e-07	0	NA	intron (NM_001037717	intron 3 of 15)	intron (NM_001037717	intron 3 of 15)	21101	NM_001037717	625098	Mm.32075	NM_001037717	ENSMUSG00000044712	Slc38a6	AW322671|EG625098	solute carrier family 38	member 6	protein-coding
39431	chr7	84199982	84200242	+	4.4	5.33	0.97	4.36	2.39e-06	7.12e-06	0	NA	Intergenic	Lx4A|LINE|L1	-48219	NM_133722	70178	Mm.23914	NM_133722	ENSMUSG00000038459	Abhd17c	2210412D01Rik|AL023007|Fam108c|Fam108c1	abhydrolase domain containing 17C	protein-coding
41426	chr6	115287060	115287265	+	4.46	5.39	1.03	4.36	4.39e-06	1.24e-05	0	NA	Intergenic	Intergenic	-34957	NM_080639	110595	Mm.255607	NM_080639	ENSMUSG00000030317	Timp4	Timp-4	tissue inhibitor of metalloproteinase 4	protein-coding
41820	chrX	53115897	53116140	+	4.39	5.32	0.97	4.36	4.82e-06	1.35e-05	0	NA	intron (NM_001357802	intron 1 of 2)	intron (NM_001357802	intron 1 of 2)	-1613	NM_019538	56096	Mm.274842	NM_019538	ENSMUSG00000061082	Plac1	DXWsu72e|Epcs26|Oosp2l	placental specific protein 1	protein-coding
78519	chr1	183585454	183585914	+	6.38	7.31	2.95	4.36	0.00708	0.0106	0.0106	NA	Intergenic	Intergenic	-163293	NR_151520	102637191	Mm.417076	NR_151520	ENSMUSG00000103305	Gm34068	-	predicted gene	34068	ncRNA
793	chr17	79835552	79836491	+	8	8.93	4.58	4.35	9.37e-40	1.39e-37	0	NA	Intergenic	Intergenic	60102	NM_019717	56298	Mm.175403	NM_019717	ENSMUSG00000059811	Atl2	2010110I21Rik|AA407293|AV334690|Aip-2|Arl6ip2	atlastin GTPase 2	protein-coding
877	chr10	89758481	89759269	+	8.11	9.04	4.69	4.35	1.3e-38	1.73e-36	0	NA	intron (NM_029166	intron 1 of 20)	intron (NM_029166	intron 1 of 20)	13884	NM_029166	75089	Mm.268922	NM_029166	ENSMUSG00000019951	Uhrf1bp1l	2010319N22Rik|4930506D01Rik|AA589495|C80672|E030041M21Rik|mKIAA0701	UHRF1 (ICBP90) binding protein 1-like	protein-coding
1005	chr8	32286337	32287079	+	7.91	8.84	4.49	4.35	6.77e-37	7.89e-35	0	NA	Intergenic	Intergenic	134813	NR_046039	666589	Mm.367675	NR_046039		Gm8179	EG666589	predicted gene 8179	ncRNA
1096	chr2	108660793	108661492	+	7.84	8.77	4.42	4.35	8.03e-36	8.59e-34	0	NA	Intergenic	Intergenic	617148	NM_029790	76894	Mm.330451	NM_029790	ENSMUSG00000057234	Mettl15	0610027B03Rik|AI303697|AW049952|Mett5d1	methyltransferase like 15	protein-coding
1430	chr3	84429135	84429800	+	7.67	8.6	4.25	4.35	6.23e-33	5.11e-31	0	NA	Intergenic	Intergenic	-49546	NR_040752	75309	Mm.159497	NR_040752	ENSMUSG00000104004	4930565D16Rik	-	RIKEN cDNA 4930565D16 gene	ncRNA
1581	chr2	24870538	24871817	+	8.3	9.23	4.88	4.35	7.07e-32	5.24e-30	0	NA	intron (NM_001012518	intron 4 of 26)	MERVL_2A-int|LTR|ERVL	48432	NM_001109687	77683	Mm.24176	NM_172545	ENSMUSG00000036893	Ehmt1	9230102N17Rik|D330003E03|Eu-HMTase1|GLP|GLP1|KMT1D|mKIAA1876	euchromatic histone methyltransferase 1	protein-coding
1986	chr3	103987895	103988574	+	7.57	8.5	4.15	4.35	1.81e-29	1.07e-27	0	NA	intron (NM_013629	intron 7 of 18)	intron (NM_013629	intron 7 of 18)	-19918	NR_030676	100125931	Mm.400392	NR_030676	ENSMUSG00000089998	Phtf1os	A130049A11Rik	putative homeodomain transcription factor 1	opposite strand	ncRNA
3622	chr7	67390704	67391255	+	7.4	8.33	3.98	4.35	9.46e-24	3.06e-22	0	NA	Intergenic	AmnSINE1|SINE|Deu	-18121	NM_001291192	17258	Mm.132788	NM_001033713	ENSMUSG00000030557	Mef2a	A430079H05Rik	myocyte enhancer factor 2A	protein-coding
3944	chr8	8453658	8454479	+	7.15	8.08	3.72	4.35	6e-23	1.78e-21	0	NA	Intergenic	Lx8|LINE|L1	206705	NM_010111	13642	Mm.209813	NM_010111	ENSMUSG00000001300	Efnb2	ELF-2|Epl5|Eplg5|Htk-L|LERK-5|Lerk5|NLERK-1	ephrin B2	protein-coding
5536	chr17	14659691	14660209	+	6.73	7.66	3.32	4.35	5.34e-20	1.13e-18	0	NA	Intergenic	MLTR14|LTR|ERV1	34312	NM_011581	21826	Mm.26688	NM_011581	ENSMUSG00000023885	Thbs2	TSP2|Thbs-2	thrombospondin 2	protein-coding
6120	chr10	10236029	10236550	+	6.7	7.63	3.28	4.35	3.16e-19	6.06e-18	0	NA	Intergenic	URR1B|DNA|hAT-Charlie	236025	NM_001127353	215772	Mm.246573	NM_172547	ENSMUSG00000050994	Adgb	9130014G24Rik	androglobin	protein-coding
6413	chr10	66849636	66850049	+	6.62	7.55	3.2	4.35	7.68e-19	1.4e-17	0	NA	Intergenic	Intergenic	70542	NR_138560	68488	Mm.338835	NR_138560		1110002J07Rik	-	RIKEN cDNA 1110002J07 gene	ncRNA
6898	chr10	19045991	19046462	+	6.55	7.48	3.12	4.35	3.24e-18	5.51e-17	0	NA	Intergenic	Intergenic	-30816	NM_009397	21929	Mm.116683	NM_009397	ENSMUSG00000019850	Tnfaip3	A20|Tnfip3	tumor necrosis factor	alpha-induced protein 3	protein-coding
6979	chr15	81142161	81142563	+	6.5	7.43	3.08	4.35	4.14e-18	6.95e-17	0	NA	intron (NM_001082536	intron 1 of 13)	intron (NM_001082536	intron 1 of 13)	-37315	NM_153049	223701	Mm.439814	NM_153049	ENSMUSG00000042292	Mkl1	AMKL|Bsac|Mal|Mrtf-A	MKL (megakaryoblastic leukemia)/myocardin-like 1	protein-coding
9196	chr1	184650450	184651083	+	6.44	7.37	3.02	4.35	6.87e-16	8.75e-15	0	NA	Intergenic	Intergenic	-61731	NR_040627	74971	Mm.410816	NR_040627	ENSMUSG00000092578	4930488B22Rik	-	RIKEN cDNA 4930488B22 gene	ncRNA
9608	chr3	145676249	145676571	+	6.17	7.1	2.75	4.35	1.58e-15	1.93e-14	0	NA	Intergenic	Intergenic	-26425	NM_010516	16007	Mm.1231	NM_010516	ENSMUSG00000028195	Cyr61	AI325051|CCN1|Igfbp10	cysteine rich protein 61	protein-coding
11949	chr8	125318641	125319072	+	5.99	6.92	2.57	4.35	6.51e-14	6.38e-13	0	NA	Intergenic	Intergenic	173977	NM_001081337	244668	Mm.271668	NM_001081337	ENSMUSG00000001995	Sipa1l2	BC058408|mKIAA1389	signal-induced proliferation-associated 1 like 2	protein-coding
12169	chr5	8120144	8120451	+	5.98	6.91	2.56	4.35	9.28e-14	8.94e-13	0	NA	intron (NM_001007220	intron 22 of 28)	intron (NM_001007220	intron 22 of 28)	63755	NM_001080974	109552	Mm.96211	NM_025618	ENSMUSG00000003161	Sri	2210417O06Rik|2900070H08Rik|Sor	sorcin	protein-coding
20887	chr6	33608989	33609389	+	5.26	6.19	1.84	4.35	4.74e-10	2.66e-09	0	NA	intron (NM_009148	intron 10 of 17)	intron (NM_009148	intron 10 of 17)	360061	NM_009148	20336	Mm.265512	NM_009148	ENSMUSG00000029763	Exoc4	C78892|Sec8|Sec8l1	exocyst complex component 4	protein-coding
30128	chr11	67076846	67077120	+	5.05	5.98	1.64	4.35	7.6e-08	2.96e-07	0	NA	Intergenic	Intergenic	-1317	NM_001099635	17883	Mm.340090	NM_001099635	ENSMUSG00000020908	Myh3	MyHC-emb|Myhs-e|Myhse	myosin	heavy polypeptide 3	skeletal muscle	embryonic	protein-coding
30178	chr14	103500982	103501220	+	4.86	5.79	1.45	4.35	7.77e-08	3.02e-07	0	NA	Intergenic	Intergenic	-12240	NM_022886	64929	Mm.244003	NM_022886	ENSMUSG00000022123	Scel	9230114I02Rik	sciellin	protein-coding
30800	chr8	114722591	114722994	+	4.86	5.79	1.45	4.35	1.03e-07	3.9e-07	0	NA	intron (NM_019573	intron 8 of 8)	intron (NM_019573	intron 8 of 8)	283140	NM_019573	80707	Mm.440420	NM_019573	ENSMUSG00000004637	Wwox	5330426P09Rik|9030416C10Rik|WOX1	WW domain-containing oxidoreductase	protein-coding
34622	chr2	132340007	132341793	+	8.81	9.74	5.4	4.35	4.66e-07	1.58e-06	0	NA	Intergenic	Intergenic	44547	NM_144944	246313	Mm.283777	NM_144944	ENSMUSG00000050558	Prokr2	B830005M06Rik|EG-VEGRF2|Gpcr73l1|Gpr73l1|PKR2	prokineticin receptor 2	protein-coding
32	chr10	21789712	21791413	+	9.49	10.42	6.08	4.34	1.46e-84	5.36e-81	0	NA	Intergenic	Intergenic	-91622	NM_001161845	20393	Mm.28405	NM_011361	ENSMUSG00000019970	Sgk1	Sgk	serum/glucocorticoid regulated kinase 1	protein-coding
273	chr4	148523225	148524286	+	8.5	9.43	5.09	4.34	3.84e-53	1.65e-50	0	NA	intron (NM_020009	intron 31 of 57)	intron (NM_020009	intron 31 of 57)	-23293	NM_001039554	654812	Mm.388929	NM_001039554	ENSMUSG00000028989	Angptl7	-	angiopoietin-like 7	protein-coding
353	chr12	82427211	82427958	+	8.36	9.29	4.96	4.34	3.38e-49	1.12e-46	0	NA	intron (NM_001167983	intron 17 of 23)	intron (NM_001167983	intron 17 of 23)	116235	NM_172579	217692	Mm.261333	NM_172579	ENSMUSG00000042700	Sipa1l1	4931426N11Rik|AW213287|Spar|mKIAA0440	signal-induced proliferation-associated 1 like 1	protein-coding
1487	chr14	32304720	32305467	+	7.78	8.71	4.37	4.34	1.58e-32	1.25e-30	0	NA	Intergenic	Intergenic	-16926	NM_001081130	239017	Mm.318302	NM_001081130	ENSMUSG00000021913	Ogdhl	-	oxoglutarate dehydrogenase-like	protein-coding
1706	chr14	33309908	33311310	+	7.72	8.65	4.31	4.34	4.45e-31	3.06e-29	0	NA	intron (NM_153800	intron 4 of 10)	RLTR28|LTR|ERVL	93786	NM_153800	239027	Mm.318350	NM_153800	ENSMUSG00000063506	Arhgap22	B230341L19Rik|RHOGAP2|p68RacGAP	Rho GTPase activating protein 22	protein-coding
2581	chr1	87550819	87551718	+	7.86	8.79	4.46	4.34	7.32e-27	3.33e-25	0	NA	intron (NM_001111314	intron 1 of 14)	intron (NM_001111314	intron 1 of 14)	22602	NM_001111314	53972	Mm.435439	NM_019867	ENSMUSG00000026259	Ngef	Tims2|ephexin	neuronal guanine nucleotide exchange factor	protein-coding
2719	chr14	54222121	54222779	+	7.46	8.39	4.05	4.34	2.25e-26	9.68e-25	0	NA	Intergenic	Intergenic	31479	NM_001113358	13135	Mm.319038	NM_010015	ENSMUSG00000022174	Dad1	AI323713	defender against cell death 1	protein-coding
3569	chr5	22224356	22225024	+	7.55	8.48	4.14	4.34	7.11e-24	2.33e-22	0	NA	intron (NM_001310464	intron 3 of 63)	intron (NM_001310464	intron 3 of 63)	120015	NM_011261	19699	Mm.425236	NM_011261	ENSMUSG00000042453	Reln	reeler|rl	reelin	protein-coding
3811	chr7	110114706	110115246	+	7.16	8.09	3.75	4.34	2.64e-23	8.14e-22	0	NA	Intergenic	Intergenic	-7083	NM_009516	22390	Mm.287173	NM_009516	ENSMUSG00000031016	Wee1	Wee1A	WEE 1 homolog 1 (S. pombe)	protein-coding
4285	chr7	126510983	126511641	+	7.06	7.99	3.65	4.34	3.66e-22	1e-20	0	NA	Intergenic	MTE-int|LTR|ERVL-MaLR	-7875	NM_183020	233871	Mm.231450	NM_183020	ENSMUSG00000032637	Atxn2l	A2D|A2LG|A2RP|A2lp|Atxnl2	ataxin 2-like	protein-coding
4335	chr18	32280421	32281182	+	7.3	8.24	3.9	4.34	4.71e-22	1.27e-20	0	NA	Intergenic	RLTR33|LTR|ERVK	40470	NM_133658	13872	Mm.282335	NM_133658	ENSMUSG00000024382	Ercc3	BTF2 p89|Ercc-3|XPB	excision repair cross-complementing rodent repair deficiency	complementation group 3	protein-coding
4829	chr2	9481518	9482428	+	7.24	8.17	3.83	4.34	3.74e-21	9.08e-20	0	NA	Intergenic	Intergenic	292458	NR_038180	73438	Mm.23558	NR_038180	ENSMUSG00000085580	1700061F12Rik	-	RIKEN cDNA 1700061F12 gene	ncRNA
6515	chr9	73854253	73854680	+	6.54	7.47	3.13	4.34	1.04e-18	1.87e-17	0	NA	intron (NM_001081153	intron 1 of 30)	intron (NM_001081153	intron 1 of 30)	79101	NM_001081153	208898	Mm.41035	NM_001081153	ENSMUSG00000062151	Unc13c	1500037O19Rik|AU019458|D9Ertd414e|Munc13-3|Unc13h3	unc-13 homolog C (C. elegans)	protein-coding
6535	chrX	142700594	142701301	+	6.53	7.46	3.13	4.34	1.11e-18	1.99e-17	0	NA	intron (NR_152447	intron 2 of 8)	intron (NR_152447	intron 2 of 8)	19221	NR_152447	209497	Mm.249648	NM_177592	ENSMUSG00000047045	Tmem164	AI316850|AI852450|AW547186|F730011B02	transmembrane protein 164	protein-coding
7110	chr15	52922231	52922839	+	6.56	7.49	3.15	4.34	5.89e-18	9.72e-17	0	NA	Intergenic	ORR1E|LTR|ERVL-MaLR	210090	NM_027212	69790	Mm.195562	NM_027212	ENSMUSG00000038622	Med30	1810038N03Rik|2510044J04Rik|TRAP25|Thrap6	mediator complex subunit 30	protein-coding
7242	chr4	100283036	100283821	+	6.78	7.71	3.37	4.34	8.66e-18	1.4e-16	0	NA	intron (NM_013845	intron 1 of 8)	intron (NM_013845	intron 1 of 8)	187637	NM_001312690	26563	Mm.57252	NM_013845	ENSMUSG00000035305	Ror1	2810404D04Rik|Ntrkr1	receptor tyrosine kinase-like orphan receptor 1	protein-coding
7754	chr1	71752296	71752789	+	6.49	7.42	3.08	4.34	2.91e-17	4.39e-16	0	NA	Intergenic	Intergenic	99207	NR_040308	100042814	Mm.405775	NR_040308	ENSMUSG00000073652	Apol7d	Gm15456	apolipoprotein L 7d	ncRNA
8220	chr1	164631715	164632124	+	6.52	7.45	3.11	4.34	9.07e-17	1.29e-15	0	NA	Intergenic	Intergenic	128612	NR_151593	102635083	Mm.98705	NR_151593	ENSMUSG00000097281	Gm26685	-	predicted gene	26685	ncRNA
9663	chr15	62028385	62028941	+	6.31	7.24	2.91	4.34	1.76e-15	2.13e-14	0	NA	Intergenic	L1MA7|LINE|L1	-9323	NR_132747	19296	Mm.4608	NM_011222	ENSMUSG00000097039	Pvt1	Ayu21-84Imeg|Gt(pU21)84Imeg|Mis-1|Mlvi-1|Pvt-1	Pvt1 oncogene	ncRNA
10699	chr3	101320812	101321373	+	6.39	7.32	2.98	4.34	9.77e-15	1.07e-13	0	NA	Intergenic	Intergenic	-33153	NM_013486	12481	Mm.22842	NM_013486	ENSMUSG00000027863	Cd2	LFA-2|Ly-37|Ly37	CD2 antigen	protein-coding
13096	chr12	70885015	70885437	+	5.97	6.9	2.56	4.34	3.28e-13	2.94e-12	0	NA	intron (NM_028127	intron 7 of 13)	intron (NM_028127	intron 7 of 13)	-52631	NM_019785	56444	Mm.29317	NM_019785	ENSMUSG00000021076	Actr10	Actr11|Arp11	ARP10 actin-related protein 10	protein-coding
17962	chr17	79064168	79064587	+	5.56	6.49	2.15	4.34	4.96e-11	3.24e-10	0	NA	intron (NM_027455	intron 2 of 6)	intron (NM_027455	intron 2 of 6)	12471	NM_001316729	70536	Mm.293870	NM_027455	ENSMUSG00000024084	Qpct	5730422A13Rik	glutaminyl-peptide cyclotransferase (glutaminyl cyclase)	protein-coding
339	chr12	98282616	98283927	+	8.32	9.25	4.92	4.33	6.99e-50	2.42e-47	0	NA	Intergenic	MamGypLTR1c|LTR|Gypsy	14636	NM_008152	14744	Mm.378924	NM_008152	ENSMUSG00000021886	Gpr65	Dig1|Gpcr25|TDAG8	G-protein coupled receptor 65	protein-coding
382	chr16	92653837	92655045	+	8.41	9.34	5	4.33	4.8e-48	1.47e-45	0	NA	intron (NM_001111023	intron 3 of 5)	intron (NM_001111023	intron 3 of 5)	42888	NM_009821	12394	Mm.4081	NM_009821	ENSMUSG00000022952	Runx1	AML1|CBF-alpha-2|Cbfa2|Pebp2a2|Pebpa2b	runt related transcription factor 1	protein-coding
609	chr15	81676412	81677908	+	8.16	9.09	4.76	4.33	1.1e-42	2.12e-40	0	NA	intron (NM_001289711	intron 8 of 17)	intron (NM_001289711	intron 8 of 17)	13271	NM_001289711	214669	Mm.280768	NM_145993	ENSMUSG00000022394	L3mbtl2	4732493N06Rik|M4mbt	L3MBTL2 polycomb repressive complex 1 subunit	protein-coding
1437	chr17	88542903	88543841	+	7.96	8.89	4.55	4.33	6.82e-33	5.56e-31	0	NA	intron (NM_028658	intron 2 of 21)	intron (NM_028658	intron 2 of 21)	13248	NM_028658	73825	Mm.271817	NM_028658	ENSMUSG00000034709	Ppp1r21	1110018J12Rik|AI426045|AW550781|Ccdc128|Klraq1	protein phosphatase 1	regulatory subunit 21	protein-coding
1862	chr1	91490193	91490889	+	7.56	8.49	4.16	4.33	3.52e-30	2.22e-28	0	NA	Intergenic	Intergenic	-4127	NM_028718	74019	Mm.318430	NM_028718	ENSMUSG00000034292	Traf3ip1	3930402D05Rik|AU041749|MIP-T3	TRAF3 interacting protein 1	protein-coding
2494	chr1	36128887	36129696	+	7.65	8.58	4.25	4.33	3.33e-27	1.56e-25	0	NA	Intergenic	Intergenic	15022	NR_105862	102465540		NR_105862	ENSMUSG00000098752	Mir6897	Gm27652|mmu-mir-6897	microRNA 6897	ncRNA
2497	chr8	109750177	109751043	+	7.45	8.38	4.05	4.33	3.32e-27	1.56e-25	0	NA	Intergenic	L1MD1|LINE|L1	-12871	NM_001080930	52335	Mm.276770	NM_001080930	ENSMUSG00000069895	Atxn1l	AW558552|Boat|C330011L24Rik|D6Mgi37|D8Ertd587e	ataxin 1-like	protein-coding
2590	chr13	45931175	45931706	+	7.29	8.22	3.89	4.33	7.88e-27	3.57e-25	0	NA	intron (NM_001199304	intron 2 of 6)	intron (NM_001199304	intron 2 of 6)	33551	NM_001199304	20238	Mm.342683	NM_009124	ENSMUSG00000046876	Atxn1	2900016G23Rik|Atx1|C85907|Gm10786|Sca1	ataxin 1	protein-coding
2656	chr14	120705017	120705988	+	7.52	8.45	4.12	4.33	1.35e-26	5.96e-25	0	NA	Intergenic	Intergenic	-205692	NM_023579	70572	Mm.221452	NM_023579	ENSMUSG00000030662	Ipo5	1110011C18Rik|5730478E03Rik|AA409333|C76941|IMB3|Kpnb3|Ranbp5|imp5	importin 5	protein-coding
3135	chr17	14339677	14340592	+	7.66	8.59	4.27	4.33	4.8e-25	1.8e-23	0	NA	intron (NM_022315	intron 4 of 12)	intron (NM_022315	intron 4 of 12)	58808	NR_027986	74917	Mm.32228	NM_183107		4930474M22Rik	-	RIKEN cDNA 4930474M22 gene	ncRNA
3948	chr19	14347218	14347964	+	7.14	8.07	3.74	4.33	6.15e-23	1.82e-21	0	NA	Intergenic	Intergenic	88359	NR_152176	667433	Mm.128913	NR_152176		Gm8630	EG667433	predicted gene 8630	ncRNA
5401	chr13	34696586	34697265	+	6.92	7.85	3.52	4.33	3.54e-20	7.68e-19	0	NA	Intergenic	Intergenic	-42717	NM_138746	108161	Mm.41991	NM_138746	ENSMUSG00000038246	Fam50b	D0H6S2654E|X5L|XAP-5-like	family with sequence similarity 50	member B	protein-coding
6137	chr14	71103980	71104368	+	6.65	7.58	3.25	4.33	3.34e-19	6.37e-18	0	NA	Intergenic	Intergenic	-147099	NR_046076	100043132	Mm.399336	NR_046075	ENSMUSG00000115139	Gm4251	-	predicted gene 4251	ncRNA
6224	chr7	92695890	92696786	+	7.28	8.21	3.87	4.33	4.44e-19	8.37e-18	0	NA	Intergenic	Intergenic	-26426	NM_029078	74737	Mm.288645	NM_029078	ENSMUSG00000041328	Pcf11	2500001H09Rik|5730417B17Rik|C77803	PCF11 cleavage and polyadenylation factor subunit	protein-coding
7478	chrX	135084087	135084817	+	6.81	7.74	3.41	4.33	1.46e-17	2.29e-16	0	NA	Intergenic	Intergenic	-24116	NR_040282	320606	Mm.439072	NR_040281	ENSMUSG00000089759	3632454L22Rik	-	RIKEN cDNA 3632454L22 gene	ncRNA
7608	chr18	60897719	60898313	+	6.52	7.45	3.11	4.33	2.09e-17	3.22e-16	0	NA	Intergenic	Intergenic	-14224	NM_001038499	545260	Mm.20147	NM_001038499	ENSMUSG00000036412	Arsi	BC020108	arylsulfatase i	protein-coding
8394	chr9	96898600	96899281	+	6.41	7.34	3.01	4.33	1.35e-16	1.89e-15	0	NA	Intergenic	Intergenic	-9466	NM_001289647	235534	Mm.233031	NM_153420	ENSMUSG00000043587	Pxylp1	9430094M07Rik|Acpl2|BB177120|C130099A20Rik	2-phosphoxylose phosphatase 1	protein-coding
9422	chr4	78235845	78236219	+	6.16	7.09	2.76	4.33	1.1e-15	1.37e-14	0	NA	Intergenic	Intergenic	-24137	NM_011211	19266	Mm.184021	NM_011211	ENSMUSG00000028399	Ptprd	1110002J03Rik|3000002J10Rik|B230219D21Rik|R-PTP-delta	protein tyrosine phosphatase	receptor type	D	protein-coding
10315	chr10	67898994	67899607	+	6.38	7.31	2.98	4.33	5.28e-15	6.01e-14	0	NA	intron (NM_178679	intron 2 of 4)	intron (NM_178679	intron 2 of 4)	13362	NM_178679	216049	Mm.268346	NM_178679	ENSMUSG00000037855	Zfp365	AI839779|AV340892|DBZ|Su48|Znf365|talanin	zinc finger protein 365	protein-coding
11071	chr7	111986915	111987390	+	6.22	7.15	2.82	4.33	1.82e-14	1.93e-13	0	NA	Intergenic	Intergenic	-36354	NM_133758	74996	Mm.16974	NM_133758	ENSMUSG00000059263	Usp47	4930502N04Rik|A630020C16Rik	ubiquitin specific peptidase 47	protein-coding
11989	chr4	40649096	40649572	+	6.21	7.14	2.81	4.33	6.85e-14	6.7e-13	0	NA	Intergenic	Intergenic	53582	NM_025545	66408	Mm.430710	NM_025545	ENSMUSG00000028411	Aptx	2410016G21Rik|AA388047|FHA-HIT	aprataxin	protein-coding
12302	chr10	24009003	24009448	+	6.21	7.14	2.82	4.33	1.14e-13	1.08e-12	0	NA	Intergenic	Lx|LINE|L1	9286	NM_001010827	209517	Mm.377232	NM_001010827	ENSMUSG00000095171	Taar7b	Gm698|taR-7b	trace amine-associated receptor 7B	protein-coding
16941	chr1	121377433	121377745	+	5.63	6.56	2.24	4.33	2.05e-11	1.42e-10	0	NA	Intergenic	Intergenic	-45000	NM_178082	72999	Mm.27136	NM_133748	ENSMUSG00000003721	Insig2	2900053I11Rik|C730043J18Rik|Insig-2	insulin induced gene 2	protein-coding
19405	chr13	49297955	49299688	+	8.9	9.83	5.49	4.33	1.62e-10	9.81e-10	0	NA	intron (NM_015759	intron 1 of 17)	intron (NM_015759	intron 1 of 17)	10387	NM_015759	30938	Mm.291089	NM_015759	ENSMUSG00000037946	Fgd3	5830461L01Rik|ZFYVE5	FYVE	RhoGEF and PH domain containing 3	protein-coding
19536	chr12	34808198	34808504	+	5.65	6.58	2.25	4.33	1.8e-10	1.08e-09	0	NA	intron (NM_001271386	intron 3 of 27)	intron (NM_001271386	intron 3 of 27)	108744	NM_001271386	79221	Mm.310551	NM_024124	ENSMUSG00000004698	Hdac9	AV022454|D030072B18Rik|HD7B|HD9|HDRP|Hdac7b|Mitr|mKIAA0744	histone deacetylase 9	protein-coding
19984	chr14	73822898	73823226	+	5.43	6.36	2.03	4.33	2.52e-10	1.48e-09	0	NA	Intergenic	Intergenic	270276	NM_011506	20916	Mm.38951	NM_011506	ENSMUSG00000022110	Sucla2	4930547K18Rik|A-SCS|SCS-betaA	succinate-Coenzyme A ligase	ADP-forming	beta subunit	protein-coding
20187	chr6	125937607	125937827	+	5.38	6.31	1.98	4.33	2.91e-10	1.69e-09	0	NA	intron (NM_153589	intron 15 of 25)	intron (NM_153589	intron 15 of 25)	227243	NM_001164035	18205	Mm.267570	NM_008742	ENSMUSG00000049107	Ntf3	AI316846|AI835689|HDNF|NGF-2|Nt3|Ntf-3	neurotrophin 3	protein-coding
20392	chr2	51989671	51990038	+	5.38	6.31	1.98	4.33	3.33e-10	1.91e-09	0	NA	Intergenic	Intergenic	-16646	NM_019401	64685	Mm.7491	NM_019401	ENSMUSG00000026946	Nmi	-	N-myc (and STAT) interactor	protein-coding
27822	chr2	64180796	64181033	+	5.03	5.96	1.64	4.33	2.59e-08	1.09e-07	0	NA	Intergenic	L1_Mur3|LINE|L1	-82876	NM_021716	60344	Mm.130769	NM_021716	ENSMUSG00000075324	Fign	fi|fidget	fidgetin	protein-coding
28545	chr18	25510274	25511374	+	7.87	8.8	4.48	4.33	3.65e-08	1.5e-07	0	NA	intron (NM_001362304	intron 3 of 12)	intron (NM_001362304	intron 3 of 12)	168924	NM_001362337	108013	Mm.266435	NM_133195	ENSMUSG00000024268	Celf4	A230070D14Rik|BRUNOL-4|Brul4|Brunol4|C130060B05Rik	CUGBP	Elav-like family member 4	protein-coding
28889	chr11	105867853	105868165	+	4.89	5.82	1.49	4.33	4.34e-08	1.76e-07	0	NA	intron (NM_181071	intron 13 of 25)	intron (NM_181071	intron 13 of 25)	76478	NM_001356374	13056	Mm.149403	NM_007805	ENSMUSG00000019590	Cyb561	-	cytochrome b-561	protein-coding
40107	chr7	65681257	65681466	+	4.37	5.3	0.97	4.33	2.95e-06	8.62e-06	0	NA	intron (NM_172310	intron 12 of 18)	intron (NM_172310	intron 12 of 18)	-12056	NM_178056	68634	Mm.476828	NM_026795	ENSMUSG00000078681	Tm2d3	1110025I09Rik|5930422O05Rik|Blp2	TM2 domain containing 3	protein-coding
1207	chr12	13698764	13699588	+	7.79	8.72	4.4	4.32	8.24e-35	8e-33	0	NA	Intergenic	Intergenic	-71530	NR_136761	102639399	Mm.122052	NR_136761	ENSMUSG00000113666	Gm35725	-	predicted gene	35725	ncRNA
4170	chr11	56374264	56374962	+	7.05	7.97	3.66	4.32	2.12e-22	5.96e-21	0	NA	Intergenic	Intergenic	-333626	NM_153079	216749	Mm.213205	NM_153079	ENSMUSG00000037393	Nmur2	Nmu2r	neuromedin U receptor 2	protein-coding
4553	chr14	120560926	120561770	+	7.57	8.5	4.18	4.32	1.16e-21	2.98e-20	0	NA	Intergenic	Intergenic	82887	NM_029519	76108	Mm.261448	NM_029519	ENSMUSG00000051615	Rap2a	5830461H18Rik	RAS related protein 2a	protein-coding
6733	chr12	82322764	82323406	+	6.52	7.45	3.13	4.32	1.92e-18	3.35e-17	0	NA	intron (NM_001167983	intron 4 of 23)	intron (NM_001167983	intron 4 of 23)	11736	NM_172579	217692	Mm.261333	NM_172579	ENSMUSG00000042700	Sipa1l1	4931426N11Rik|AW213287|Spar|mKIAA0440	signal-induced proliferation-associated 1 like 1	protein-coding
7439	chr16	15709761	15710320	+	6.52	7.45	3.13	4.32	1.35e-17	2.13e-16	0	NA	intron (NM_011159	intron 32 of 85)	RMER16C|LTR|ERVK	72174	NM_011159	19090	Mm.71	NM_011159	ENSMUSG00000022672	Prkdc	AI326420|AU019811|DNA-PKcs|DNAPDcs|DNAPK|DNPK1|DOXNPH|HYRC1|XRCC7|dxnph|p460|scid|slip	protein kinase	DNA activated	catalytic polypeptide	protein-coding
7798	chr13	96906493	96907153	+	6.73	7.66	3.34	4.32	3.24e-17	4.88e-16	0	NA	Intergenic	MTD|LTR|ERVL-MaLR	-17866	NM_001166065	218476	Mm.483490	NM_001166065	ENSMUSG00000091387	Gcnt4	C2gnt3|Gm279|Gm73	glucosaminyl (N-acetyl) transferase 4	core 2 (beta-1	6-N-acetylglucosaminyltransferase)	protein-coding
9781	chr2	117731047	117731617	+	6.29	7.22	2.91	4.32	2.21e-15	2.65e-14	0	NA	Intergenic	Intergenic	81470	NR_126427	100504728	Mm.413174	NR_126427		Gm13985	-	predicted gene 13985	ncRNA
14029	chr6	29686046	29686351	+	5.94	6.87	2.55	4.32	1.04e-12	8.66e-12	0	NA	Intergenic	RMER1B|Other|Other	-8016	NM_001301407	232670	Mm.225289	NM_146173	ENSMUSG00000001763	Tspan33	1300010A20Rik|Pen	tetraspanin 33	protein-coding
14877	chr17	45241022	45241481	+	5.76	6.69	2.37	4.32	2.59e-12	2.04e-11	0	NA	Intergenic	Intergenic	192456	NM_152810	71702	Mm.28270	NM_152810	ENSMUSG00000023932	Cdc5l	1200002I02Rik|AA408004|PCDC5RP	cell division cycle 5-like (S. pombe)	protein-coding
15473	chr10	120446234	120446642	+	5.84	6.77	2.45	4.32	4.98e-12	3.77e-11	0	NA	intron (NM_001347170	intron 3 of 5)	intron (NM_001347170	intron 3 of 5)	1672	NR_030434	791076		NR_030434	ENSMUSG00000076448	Mir763	Mirn763|mir-763|mmu-mir-763	microRNA 763	ncRNA
18391	chr11	32019968	32020375	+	5.72	6.65	2.33	4.32	7.23e-11	4.61e-10	0	NA	intron (NM_001290681	intron 3 of 4)	intron (NM_001290681	intron 3 of 4)	18894	NM_001290681	18197	Mm.3304	NM_008741	ENSMUSG00000020297	Nsg2	P19	neuron specific gene family member 2	protein-coding
25928	chr15	68142415	68142754	+	5.06	5.99	1.66	4.32	9.74e-09	4.4e-08	0	NA	intron (NR_152182	intron 9 of 13)	intron (NR_152182	intron 9 of 13)	116272	NM_001145888	380993	Mm.309526	NM_198644	ENSMUSG00000022335	Zfat	Gm922|Zfat1|Zfp406	zinc finger and AT hook domain containing	protein-coding
26001	chr10	98324649	98324957	+	5.07	6	1.68	4.32	1.01e-08	4.55e-08	0	NA	intron (NR_045179	intron 4 of 4)	intron (NR_045179	intron 4 of 4)	27064	NR_045179	667438	Mm.414522	NR_045179	ENSMUSG00000112896	Gm8633	EG667438	predicted gene 8633	ncRNA
27657	chr17	79798401	79798803	+	5.03	5.96	1.64	4.32	2.39e-08	1.01e-07	0	NA	Intergenic	Intergenic	-83561	NM_009994	13078	Mm.214016	NM_009994	ENSMUSG00000024087	Cyp1b1	CP1B|P4501b1	cytochrome P450	family 1	subfamily b	polypeptide 1	protein-coding
40813	chr8	31928228	31928472	+	4.36	5.29	0.97	4.32	3.71e-06	1.06e-05	0	NA	Intergenic	Intergenic	-10147	NM_178591	211323	Mm.153432	NM_178591	ENSMUSG00000062991	Nrg1	6030402G23Rik|ARIA|D230005F13Rik|GGF|GGFII|HRG|HRGalpha|Hgl|NDF|SMDF	neuregulin 1	protein-coding
23	chr11	62553631	62557594	+	10.83	11.76	7.45	4.31	8.2e-90	4.18e-86	0	NA	Intergenic	Intergenic	3881	NM_001313984	22187	Mm.371592	NM_011664	ENSMUSG00000019505	Ubb	AL033289|Rps27a|Uba52|Ubb2|Ubc	ubiquitin B	protein-coding
733	chr13	33028126	33029204	+	8.02	8.94	4.63	4.31	1.93e-40	3.09e-38	0	NA	intron (NM_011452	intron 1 of 6)	intron (NM_011452	intron 1 of 6)	1251	NM_011452	20706	Mm.45371	NM_011452	ENSMUSG00000021403	Serpinb9b	1600019A21Rik|R86|SPI-CI|Spi10|ovalbumin	serine (or cysteine) peptidase inhibitor	clade B	member 9b	protein-coding
779	chr12	81971256	81972336	+	8.25	9.18	4.87	4.31	7.56e-40	1.14e-37	0	NA	intron (NM_018814	intron 20 of 35)	intron (NM_018814	intron 20 of 35)	111766	NM_018814	54604	Mm.86584	NM_018814	ENSMUSG00000021140	Pcnx	2900024E21Rik|3526401J03Rik|AF096286|AI327143|AI413187|Pcnx1|Pcnxl1	pecanex homolog	protein-coding
809	chr11	74482985	74484318	+	8.58	9.51	5.2	4.31	1.62e-39	2.34e-37	0	NA	intron (NM_001015046	intron 3 of 24)	intron (NM_001015046	intron 3 of 24)	106507	NM_001015046	380711	Mm.425690	NM_001015046	ENSMUSG00000038807	Rap1gap2	AU067654|Garnl4|Gm1561|mKIAA1039	RAP1 GTPase activating protein 2	protein-coding
1747	chr15	57567876	57568609	+	7.57	8.5	4.19	4.31	7.67e-31	5.15e-29	0	NA	Intergenic	Intergenic	-90617	NM_172378	210463	Mm.26555	NM_172378	ENSMUSG00000022366	Slc22a22	oat-pg	solute carrier family 22 (organic cation transporter)	member 22	protein-coding
2072	chr8	111058868	111059534	+	7.45	8.38	4.07	4.31	4.77e-29	2.7e-27	0	NA	Intergenic	Intergenic	2862	NM_028274	72544	Mm.24174	NM_028274	ENSMUSG00000109941	Exosc6	2610510N21Rik|C76919|Mtr3	exosome component 6	protein-coding
2621	chr4	88931133	88931765	+	7.33	8.26	3.95	4.31	1.05e-26	4.68e-25	0	NA	intron (NR_132735	intron 1 of 2)	intron (NR_132735	intron 1 of 2)	10593	NR_132735	106557447	Mm.484668	NR_132734		LOC106557447	-	uncharacterized LOC106557447	ncRNA
2713	chr5	23255770	23256509	+	7.64	8.57	4.26	4.31	2.16e-26	9.34e-25	0	NA	intron (NM_001081231	intron 3 of 3)	intron (NM_001081231	intron 3 of 3)	178214	NR_040469	269630	Mm.425231	NR_040469	ENSMUSG00000073147	5031425E22Rik	-	RIKEN cDNA 5031425E22 gene	ncRNA
4297	chr7	92837209	92837785	+	7.22	8.15	3.84	4.31	3.89e-22	1.06e-20	0	NA	TTS (NM_029494)	TTS (NM_029494)	36750	NM_001355126	74041	Mm.26468	NM_028729	ENSMUSG00000030641	Ddias	4632434I11Rik|noxin	DNA damage-induced apoptosis suppressor	protein-coding
4421	chr4	107364100	107364686	+	7.25	8.18	3.86	4.31	6.59e-22	1.75e-20	0	NA	Intergenic	Intergenic	-3391	NM_028355	72787	Mm.28478	NM_028355	ENSMUSG00000028614	Ndc1	2810475A17Rik|AI450313|Tmem48|sks	NDC1 transmembrane nucleoporin	protein-coding
5284	chr4	105610831	105611404	+	6.81	7.74	3.44	4.31	2.28e-20	5.06e-19	0	NA	Intergenic	Intergenic	453770	NM_080555	67916	Mm.348326	NM_080555	ENSMUSG00000028517	Plpp3	1110003O22Rik|2610002D05Rik|AV025606|D4Bwg0538e|D4Bwg1535e|Lpp3|Ppab2b|Ppap2b	phospholipid phosphatase 3	protein-coding
6035	chr8	33969906	33970541	+	6.92	7.85	3.54	4.31	2.54e-19	4.93e-18	0	NA	Intergenic	MLT1A|LTR|ERVL-MaLR	-40360	NM_019733	19663	Mm.323997	NM_019733	ENSMUSG00000031586	Rbpms	2010300K22Rik|2700019M19Rik|AU017537|RBP-MS|hermes	RNA binding protein gene with multiple splicing	protein-coding
6415	chr15	43807084	43807868	+	6.69	7.62	3.31	4.31	7.68e-19	1.4e-17	0	NA	Intergenic	Intergenic	62553	NM_175502	239408	Mm.41219	NM_175502	ENSMUSG00000054409	Tmem74	AA549547|B230382K22Rik	transmembrane protein 74	protein-coding
6717	chr14	21932330	21933054	+	6.56	7.49	3.18	4.31	1.83e-18	3.2e-17	0	NA	Intergenic	Intergenic	56909	NM_145459	218820	Mm.292401	NM_145459	ENSMUSG00000039081	Zfp503	AI181838|B830002A16Rik|Nolz-1|Nolz1|Znf503	zinc finger protein 503	protein-coding
7121	chr7	16706321	16706796	+	6.46	7.39	3.08	4.31	6e-18	9.89e-17	0	NA	Intergenic	Intergenic	-15371	NM_011927	26368	Mm.27096	NM_011927	ENSMUSG00000007209	Ceacam9	AA410097|AW545709|Cea-5|Cea5|mmCGM8	carcinoembryonic antigen-related cell adhesion molecule 9	protein-coding
7758	chrX	94152356	94153000	+	6.61	7.54	3.24	4.31	2.95e-17	4.45e-16	0	NA	Intergenic	Intergenic	-28911	NM_001358356	22764	Mm.919	NM_011768	ENSMUSG00000079509	Zfx	Zfx5|Zfx5	6|Zfx6	zinc finger protein X-linked	protein-coding
7850	chr10	24397080	24397700	+	6.56	7.49	3.18	4.31	3.67e-17	5.49e-16	0	NA	Intergenic	Intergenic	173873	NM_021509	59012	Mm.285934	NM_021509	ENSMUSG00000020000	Moxd1	3230402N08Rik|MNCb-5203	monooxygenase	DBH-like 1	protein-coding
9546	chrX	47930356	47931014	+	6.28	7.21	2.9	4.31	1.4e-15	1.72e-14	0	NA	intron (NM_177215	intron 5 of 23)	intron (NM_177215	intron 5 of 23)	18229	NM_177215	320634	Mm.210343	NM_177215	ENSMUSG00000001173	Ocrl	9530014D17Rik|BB143339|OCRL1	OCRL	inositol polyphosphate-5-phosphatase	protein-coding
11308	chr3	123007318	123007793	+	6.28	7.21	2.9	4.31	2.5e-14	2.6e-13	0	NA	intron (NM_021503	intron 5 of 5)	(CACG)n|Simple_repeat|Simple_repeat	-23108	NM_133857	99526	Mm.491248	NM_133857	ENSMUSG00000039701	Usp53	AA939927|Phxr3|Sp6|mKIAA1350|mbo	ubiquitin specific peptidase 53	protein-coding
12869	chr11	32265155	32265667	+	5.96	6.88	2.57	4.31	2.48e-13	2.26e-12	0	NA	intron (NR_104306	intron 1 of 13)	intron (NR_104306	intron 1 of 13)	2296	NM_181569	17168	Mm.263161	NM_181569	ENSMUSG00000020289	Nprl3	Aag|CGTHBA|HS-26|HS-40|Mare|Phg|Prox1|m(alpha)RE	nitrogen permease regulator-like 3	protein-coding
19520	chr11	100056313	100056623	+	5.48	6.41	2.1	4.31	1.79e-10	1.07e-09	0	NA	Intergenic	Intergenic	-5917	NM_010659	16660	Mm.439673	NM_010659	ENSMUSG00000048981	Krt31	Ha1|Kha1|Krt1-1|MKHA-1	keratin 31	protein-coding
26526	chr3	123558453	123558678	+	5.03	5.96	1.65	4.31	1.34e-08	5.92e-08	0	NA	intron (NR_121616	intron 8 of 13)	MER5A|DNA|hAT-Charlie	-50229	NR_028574	69895	Mm.260791	NR_028574	ENSMUSG00000104960	Snhg8	1110065M07Rik|2010109N14Rik	small nucleolar RNA host gene 8	ncRNA
27858	chr17	21476273	21476747	+	5.01	5.94	1.64	4.31	2.64e-08	1.11e-07	0	NA	Intergenic	MMVL30-int|LTR|ERV1	-12478	NM_013843	24132	Mm.42140	NM_013843	ENSMUSG00000057409	Zfp53	D030067O06Rik|KRAZ1|Zfp-53|Zfp118|zfas8	zinc finger protein 53	protein-coding
499	chr16	94228706	94229807	+	8.58	9.51	5.21	4.3	3.82e-45	8.96e-43	0	NA	intron (NM_001360045	intron 6 of 10)	intron (NM_001360045	intron 6 of 10)	61035	NM_001360045	110948	Mm.30921	NM_139145	ENSMUSG00000040820	Hlcs	410I21.SP6|D16Jhu34	holocarboxylase synthetase (biotin- [propriony-Coenzyme A-carboxylase (ATP-hydrolysing)] ligase)	protein-coding
831	chr5	131710659	131712100	+	8.09	9.02	4.71	4.3	3.15e-39	4.45e-37	0	NA	intron (NM_177047	intron 5 of 19)	intron (NM_177047	intron 5 of 19)	-168890	NR_040704	75369	Mm.389696	NR_040704	ENSMUSG00000105773	4930563F08Rik	-	RIKEN cDNA 4930563F08 gene	ncRNA
896	chr13	15624229	15625329	+	7.97	8.89	4.6	4.3	1.95e-38	2.55e-36	0	NA	intron (NM_008130	intron 4 of 14)	intron (NM_008130	intron 4 of 14)	161056	NM_008130	14634	Mm.5098	NM_008130	ENSMUSG00000021318	Gli3	AI854843|AU023367|Bph|GLI3-190|GLI3FL|Pdn|Xt|add	GLI-Kruppel family member GLI3	protein-coding
1756	chr6	17072550	17073585	+	7.67	8.6	4.31	4.3	8.96e-31	5.98e-29	0	NA	intron (NM_207176	intron 1 of 6)	intron (NM_207176	intron 1 of 6)	7918	NM_207176	21753	Mm.436548	NM_011570	ENSMUSG00000029552	Tes	D6Ertd352e|TESS|Tes1|Tes2|testin2	testis derived transcript	protein-coding
3887	chr2	125948074	125948922	+	7.6	8.53	4.24	4.3	4.6e-23	1.39e-21	0	NA	intron (NM_175154	intron 8 of 9)	MER58A|DNA|hAT-Charlie	82275	NM_001291002	69976	Mm.20216	NM_175154	ENSMUSG00000027207	Galk2	2810017M24Rik|AI327030|Gk2	galactokinase 2	protein-coding
6398	chr2	78580097	78580588	+	6.83	7.76	3.46	4.3	7.29e-19	1.34e-17	0	NA	Intergenic	Intergenic	-288705	NM_009454	22193	Mm.1485	NM_009454	ENSMUSG00000027011	Ube2e3	Ubce4|ubcM2	ubiquitin-conjugating enzyme E2E 3	protein-coding
6789	chr14	47376651	47377501	+	6.84	7.77	3.47	4.3	2.31e-18	4e-17	0	NA	intron (NM_001145953	intron 1 of 5)	MIRc|SINE|MIR	3216	NM_001145953	16854	Mm.248615	NM_010705	ENSMUSG00000050335	Lgals3	GBP|L-34|Mac-2|gal3	lectin	galactose binding	soluble 3	protein-coding
7227	chr13	73680323	73680956	+	6.62	7.55	3.25	4.3	8.11e-18	1.32e-16	0	NA	3' UTR (NM_028878	exon 12 of 12)	3' UTR (NM_028878	exon 12 of 12)	-2616	NM_001136087	22598	Mm.30370	NM_011730	ENSMUSG00000021612	Slc6a18	B0AT3|D630001K16Rik|Xt2|Xtrp2	solute carrier family 6 (neurotransmitter transporter)	member 18	protein-coding
9153	chr14	72892248	72892762	+	6.35	7.28	2.98	4.3	6.31e-16	8.08e-15	0	NA	Intergenic	Intergenic	-133098	NR_027860	668489	Mm.158324	NR_027860		Gm9199	EG668489	glycine cleavage system protein H (aminomethyl carrier) pseudogene	pseudo
10839	chr15	27094030	27094484	+	6.3	7.23	2.93	4.3	1.23e-14	1.33e-13	0	NA	Intergenic	Intergenic	-198693	NM_176959	448987	Mm.253378	NM_176959	ENSMUSG00000043556	Fbxl7	AL023057|D230018M15Rik|FBL7|Fbl6	F-box and leucine-rich repeat protein 7	protein-coding
12122	chrX	104487873	104488452	+	6.18	7.11	2.81	4.3	8.69e-14	8.41e-13	0	NA	intron (NM_001081189	intron 1 of 6)	intron (NM_001081189	intron 1 of 6)	5380	NM_001081189	331487	Mm.438275	NM_001081189	ENSMUSG00000073016	Uprt	Gm774	uracil phosphoribosyltransferase	protein-coding
14465	chr10	86431183	86431588	+	5.83	6.76	2.46	4.3	1.66e-12	1.34e-11	0	NA	intron (NM_013722	intron 3 of 13)	intron (NM_013722	intron 3 of 13)	67511	NM_013722	27204	Mm.394931	NM_013722	ENSMUSG00000059602	Syn3	-	synapsin III	protein-coding
15982	chr4	123859866	123860265	+	5.82	6.75	2.45	4.3	8.11e-12	5.95e-11	0	NA	Intergenic	Intergenic	-44948	NM_019660	56309	Mm.446553	NM_019660	ENSMUSG00000028647	Mycbp	5730488M09Rik|AW552132|AW742590|Amy-1	MYC binding protein	protein-coding
16038	chr12	100378314	100378595	+	5.63	6.56	2.25	4.3	8.74e-12	6.38e-11	0	NA	intron (NM_001033213	intron 13 of 19)	intron (NM_001033213	intron 13 of 19)	101845	NR_045741	100038713	Mm.470751	NR_045741	ENSMUSG00000113679	Gm10432	-	predicted gene 10432	ncRNA
17322	chr15	90432101	90432457	+	5.61	6.54	2.24	4.3	2.9e-11	1.96e-10	0	NA	Intergenic	Intergenic	78569	NR_155426	102640415	Mm.394352	NR_155426	ENSMUSG00000116204	Gm36480	-	predicted gene	36480	ncRNA
21964	chr1	93268243	93268564	+	5.21	6.14	1.84	4.3	9.79e-10	5.22e-09	0	NA	intron (NM_172463	intron 8 of 30)	RMER6C|LTR|ERVK	-6146	NR_105866	102465543		NR_105866	ENSMUSG00000098997	Mir6901	Gm27732|mmu-mir-6901	microRNA 6901	ncRNA
25879	chr3	136171677	136171964	+	5.03	5.96	1.66	4.3	9.48e-09	4.3e-08	0	NA	intron (NM_001033350	intron 7 of 16)	Lx8|LINE|L1	154246	NM_001033350	242248	Mm.30832	NM_001033350	ENSMUSG00000037922	Bank1	A530094C12Rik|AI451642|AVIEF|BANK	B cell scaffold protein with ankyrin repeats 1	protein-coding
30660	chr2	124168494	124168748	+	4.9	5.83	1.53	4.3	9.66e-08	3.69e-07	0	NA	intron (NM_001290997	intron 2 of 20)	intron (NM_001290997	intron 2 of 20)	-38665	NR_040611	74702	Mm.410814	NR_040611	ENSMUSG00000085496	4930517E11Rik	-	RIKEN cDNA 4930517E11 gene	ncRNA
36142	chr1	93857472	93857729	+	4.6	5.52	1.23	4.3	8.2e-07	2.66e-06	0	NA	Intergenic	Intergenic	-3744	NM_199366	381334	Mm.482878	NM_199366	ENSMUSG00000094651	Gal3st2	GP3ST|Gm988	galactose-3-O-sulfotransferase 2	protein-coding
39367	chr14	51052049	51052245	+	4.41	5.34	1.03	4.3	2.35e-06	7.01e-06	0	NA	Intergenic	B3A|SINE|B2	-1984	NM_001011877	497113	Mm.379741	NM_001011877	ENSMUSG00000059648	Rnase11	Raj1	ribonuclease	RNase A family	11 (non-active)	protein-coding
40261	chr11	61642235	61642411	+	4.38	5.31	1.01	4.3	3.1e-06	9.04e-06	0	NA	Intergenic	Intergenic	-10998	NM_027817	71520	Mm.202760	NM_027817	ENSMUSG00000004837	Grap	8430435N19Rik|BB233594	GRB2-related adaptor protein	protein-coding
40667	chr13	78883143	78883395	+	4.41	5.34	1.03	4.3	3.54e-06	1.02e-05	0	NA	Intergenic	Intergenic	-684396	NM_010151	13865	Mm.439653	NM_010151	ENSMUSG00000069171	Nr2f1	COUP-TF1|COUP-TFI|COUPTFA|EAR-3|EAR3|Erbal3|SVP44|Tcfcoup1	nuclear receptor subfamily 2	group F	member 1	protein-coding
77	chr9	103071149	103073790	+	9.6	10.53	6.24	4.29	1.17e-70	1.78e-67	0	NA	intron (NM_033314	intron 6 of 13)	intron (NM_033314	intron 6 of 13)	-39605	NM_173781	270192	Mm.490252	NM_173781	ENSMUSG00000032549	Rab6b	9630015C03|AI844641|C330006L04Rik|D9Bwg0185e	RAB6B	member RAS oncogene family	protein-coding
348	chr14	57759223	57761320	+	8.61	9.54	5.25	4.29	2.22e-49	7.47e-47	0	NA	Intergenic	Intergenic	-14148	NM_015771	50523	Mm.347899	NM_015771	ENSMUSG00000021959	Lats2	4932411G09Rik|AV277261|AW228608	large tumor suppressor 2	protein-coding
1353	chr3	27886368	27887083	+	7.87	8.79	4.51	4.29	1.43e-33	1.23e-31	0	NA	intron (NM_001164437	intron 1 of 3)	intron (NM_001164437	intron 1 of 3)	9643	NM_001164437	208613	Mm.59189	NM_001164437	ENSMUSG00000043164	Tmem212	E030011K20Rik|Gm564	transmembrane protein 212	protein-coding
1408	chr11	75812989	75813852	+	8.12	9.05	4.76	4.29	3.99e-33	3.32e-31	0	NA	intron (NR_136933	intron 1 of 3)	intron (NR_136933	intron 1 of 3)	-17360	NM_007873	13447	Mm.5137	NM_007873	ENSMUSG00000020848	Doc2b	-	double C2	beta	protein-coding
1972	chr7	49762302	49763044	+	7.61	8.54	4.25	4.29	1.56e-29	9.28e-28	0	NA	intron (NM_001146053	intron 3 of 5)	intron (NM_001146053	intron 3 of 5)	3161	NM_001146052	53415	Mm.20801	NM_016865	ENSMUSG00000039745	Htatip2	AW111545|Cc3|Tip30	HIV-1 Tat interactive protein 2	protein-coding
2198	chr1	71893389	71894313	+	7.59	8.51	4.22	4.29	1.79e-28	9.55e-27	0	NA	Intergenic	Intergenic	5739	NR_027659	667931	Mm.214128	NR_027658	ENSMUSG00000099707	Gm8883	EG667931|Gm554	predicted gene 8883	ncRNA
2964	chr18	32647450	32648100	+	7.45	8.37	4.08	4.29	1.2e-25	4.75e-24	0	NA	Intergenic	RMER15|LTR|ERVL	-87741	NM_001347610	71683	Mm.292145	NM_027863	ENSMUSG00000090523	Gypc	0610037F22Rik|Cd236r	glycophorin C	protein-coding
3201	chr1	161392883	161393513	+	7.25	8.18	3.89	4.29	7.05e-25	2.58e-23	0	NA	Intergenic	B4A|SINE|B4	-2240	NM_009452	22164	Mm.4994	NM_009452	ENSMUSG00000026700	Tnfsf4	Ath-1|Ath1|CD134L|OX-40L|Ox40l|TXGP1|Tnlg2b|Txgp1l|gp34	tumor necrosis factor (ligand) superfamily	member 4	protein-coding
4164	chr1	77535979	77536545	+	7.13	8.06	3.78	4.29	2.05e-22	5.78e-21	0	NA	Intergenic	Intergenic	-21174	NM_007936	13838	Mm.400747	NM_007936	ENSMUSG00000026235	Epha4	2900005C20Rik|AI385584|Cek8|Hek8|Sek|Sek1|Tyro1|rb	Eph receptor A4	protein-coding
5349	chr16	8810576	8811352	+	6.83	7.76	3.47	4.29	2.95e-20	6.47e-19	0	NA	Intergenic	Intergenic	-19136	NM_001081400	69053	Mm.390868	NM_001081400	ENSMUSG00000022507	1810013L24Rik	1110017P05Rik|3010002C02Rik|AA792997|AW124177|Gm19906|R74903	RIKEN cDNA 1810013L24 gene	protein-coding
6631	chr2	16491269	16491759	+	7.02	7.95	3.66	4.29	1.46e-18	2.58e-17	0	NA	intron (NM_026162	intron 1 of 13)	intron (NM_026162	intron 1 of 13)	135210	NM_026162	67448	Mm.313938	NM_026162	ENSMUSG00000026748	Plxdc2	1200007L24Rik|5430431D22Rik|AI646728|AU022916|AV231634|Tem7r	plexin domain containing 2	protein-coding
8087	chr14	22887124	22887698	+	6.66	7.59	3.3	4.29	6.61e-17	9.58e-16	0	NA	intron (NM_028275	intron 6 of 6)	intron (NM_028275	intron 6 of 6)	207160	NR_033550	791307	Mm.364384	NR_033550	ENSMUSG00000068680	Gm10248	-	predicted gene 10248	ncRNA
8401	chr1	129462785	129463233	+	6.5	7.42	3.14	4.29	1.39e-16	1.94e-15	0	NA	intron (NM_172485	intron 2 of 27)	intron (NM_172485	intron 2 of 27)	189705	NM_172485	210417	Mm.380518	NM_172485	ENSMUSG00000042581	Thsd7b	1700074E13Rik|B930082A18|D130067I03Rik	thrombospondin	type I	domain containing 7B	protein-coding
9302	chr13	97604474	97604794	+	6.31	7.24	2.95	4.29	8.78e-16	1.11e-14	0	NA	Intergenic	RMER17C-int|LTR|ERVK	44634	NR_046157	328314	Mm.138047	NR_046157	ENSMUSG00000110235	Gm5086	B230311A21|EG328314	predicted gene 5086	ncRNA
17569	chr6	88374295	88374696	+	5.61	6.54	2.25	4.29	3.6e-11	2.4e-10	0	NA	intron (NR_149744	intron 1 of 5)	intron (NR_149744	intron 1 of 5)	72044	NR_149744	65967	Mm.333237	NM_023060	ENSMUSG00000033216	Eefsec	Selb|mSelB|sec	eukaryotic elongation factor	selenocysteine-tRNA-specific	protein-coding
23716	chr7	43571242	43571592	+	5.32	6.25	1.95	4.29	2.88e-09	1.42e-08	0	NA	intron (NM_001008549	intron 4 of 4)	L1MA5|LINE|L1	-8169	NM_001357769	210105	Mm.234422	NM_172482	ENSMUSG00000030469	Zfp719	8030458J18|9430094P17Rik|C630016O21Rik|mszf6	zinc finger protein 719	protein-coding
36502	chr4	111852746	111852970	+	4.59	5.52	1.23	4.29	9.23e-07	2.97e-06	0	NA	Intergenic	Intergenic	49938	NM_145551	230612	Mm.26630	NM_145551	ENSMUSG00000028544	Slc5a9	AI159731|SGLT4	solute carrier family 5 (sodium/glucose cotransporter)	member 9	protein-coding
252	chr4	138213569	138214564	+	8.62	9.55	5.27	4.28	5.52e-54	2.57e-51	0	NA	Intergenic	Intergenic	-2546	NM_001285480	15441	Mm.348429	NM_010470	ENSMUSG00000028759	Hp1bp3	Hp1bp74	heterochromatin protein 1	binding protein 3	protein-coding
504	chr3	95066134	95067112	+	8.19	9.12	4.84	4.28	5.61e-45	1.31e-42	0	NA	intron (NM_001293707	intron 9 of 14)	intron (NM_001293707	intron 9 of 14)	-24009	NM_008951	19185	Mm.2261	NM_008951	ENSMUSG00000005625	Psmd4	Af1|Mcb1|angiocidin	proteasome (prosome	macropain) 26S subunit	non-ATPase	4	protein-coding
1179	chr7	134007718	134008767	+	7.95	8.88	4.6	4.28	5.09e-35	5.06e-33	0	NA	intron (NM_007400	intron 4 of 22)	intron (NM_007400	intron 4 of 22)	216855	NM_007400	11489	Mm.439714	NM_007400	ENSMUSG00000054555	Adam12	Mltna	a disintegrin and metallopeptidase domain 12 (meltrin alpha)	protein-coding
2914	chr8	121955610	121956310	+	7.31	8.24	3.95	4.28	8.92e-26	3.59e-24	0	NA	intron (NM_016812	intron 1 of 13)	intron (NM_016812	intron 1 of 13)	5468	NM_001110100	53325	Mm.287163	NM_016812	ENSMUSG00000025316	Banp	AA408158|SMAR1	BTG3 associated nuclear protein	protein-coding
2965	chr2	94051833	94052500	+	7.21	8.13	3.85	4.28	1.21e-25	4.78e-24	0	NA	intron (NM_019657	intron 7 of 10)	intron (NM_019657	intron 7 of 10)	-41436	NM_026944	69113	Mm.272498	NM_026944	ENSMUSG00000040174	Alkbh3	1700108H04Rik|1810020C19Rik|Abh3|mABH3	alkB homolog 3	alpha-ketoglutarate-dependent dioxygenase	protein-coding
3261	chr12	40711915	40712717	+	7.12	8.05	3.77	4.28	9.77e-25	3.51e-23	0	NA	intron (NM_172803	intron 16 of 52)	intron (NM_172803	intron 16 of 52)	266263	NM_172803	238130	Mm.341423	NM_172803	ENSMUSG00000035954	Dock4	5330406C03|6330411N01Rik|AF263288|C030023J22|mKIAA0716	dedicator of cytokinesis 4	protein-coding
3510	chr17	17792450	17793101	+	7.12	8.05	3.77	4.28	5.25e-24	1.75e-22	0	NA	Intergenic	Lx8b|LINE|L1	-37413	NR_029536	387230		NR_029536	ENSMUSG00000065396	Mir99b	Mirn99b|mmu-mir-99b	microRNA 99b	ncRNA
4033	chr3	136431713	136432583	+	7.46	8.39	4.11	4.28	1.03e-22	2.99e-21	0	NA	Intergenic	Intergenic	17201	NR_040592	70055	Mm.261063	NR_040592	ENSMUSG00000099508	1700030L20Rik	-	RIKEN cDNA 1700030L20 gene	ncRNA
4168	chr10	26895622	26896155	+	6.95	7.87	3.59	4.28	2.11e-22	5.94e-21	0	NA	intron (NM_176837	intron 12 of 14)	intron (NM_176837	intron 12 of 14)	123376	NM_176837	73910	Mm.356496	NM_176837	ENSMUSG00000039031	Arhgap18	4833419J07Rik|AI314906|AI843501	Rho GTPase activating protein 18	protein-coding
5893	chr19	28624287	28625039	+	6.87	7.79	3.51	4.28	1.69e-19	3.36e-18	0	NA	intron (NM_175459	intron 2 of 10)	intron (NM_175459	intron 2 of 10)	-53561	NR_045330	320176	Mm.406716	NR_045330	ENSMUSG00000097735	D930032P07Rik	-	RIKEN cDNA D930032P07 gene	ncRNA
6335	chr19	17024597	17025103	+	6.63	7.56	3.28	4.28	6.37e-19	1.18e-17	0	NA	intron (NM_181348	intron 6 of 19)	intron (NM_181348	intron 6 of 19)	68732	NM_181348	353211	Mm.257354	NM_181348	ENSMUSG00000039126	Prune2	6330414G02Rik|A230083H22Rik|A330102H22Rik|Bmcc1|mKIAA0367	prune homolog 2	protein-coding
6438	chr11	106489898	106490477	+	7.15	8.08	3.8	4.28	8.24e-19	1.5e-17	0	NA	Intergenic	Intergenic	-2391	NM_023913	78943	Mm.340943	NM_023913	ENSMUSG00000020715	Ern1	9030414B18Rik|AI225830|C85377|Ire1a|Ire1alpha|Ire1p	endoplasmic reticulum (ER) to nucleus signalling 1	protein-coding
6743	chr3	69485484	69486227	+	7	7.93	3.65	4.28	2e-18	3.47e-17	0	NA	intron (NM_178726	intron 1 of 3)	intron (NM_178726	intron 1 of 3)	113105	NM_020026	26879	Mm.153710	NM_020026	ENSMUSG00000043300	B3galnt1	B3galt3|b3GT3	UDP-GalNAc:betaGlcNAc beta 1	3-galactosaminyltransferase	polypeptide 1	protein-coding
7851	chr5	34231783	34232305	+	6.9	7.83	3.55	4.28	3.68e-17	5.49e-16	0	NA	intron (NM_001015039	intron 6 of 12)	intron (NM_001015039	intron 6 of 12)	-44334	NM_010753	17122	Mm.259260	NM_010753	ENSMUSG00000037235	Mxd4	2810410A03Rik|Mad4|bHLHc12	Max dimerization protein 4	protein-coding
8876	chrX	139051903	139052350	+	6.27	7.2	2.92	4.28	3.68e-16	4.86e-15	0	NA	Intergenic	MTD-int|LTR|ERVL-MaLR	33110	NM_177920	331535	Mm.211704	NM_177920	ENSMUSG00000031271	Serpina7	C730040N12Rik|Tbg	serine (or cysteine) peptidase inhibitor	clade A (alpha-1 antiproteinase	antitrypsin)	member 7	protein-coding
11204	chr6	125540187	125540564	+	6.04	6.97	2.69	4.28	2.18e-14	2.29e-13	0	NA	Intergenic	B3A|SINE|B2	-12573	NM_011708	22371	Mm.22339	NM_011708	ENSMUSG00000001930	Vwf	6820430P06Rik|AI551257|B130011O06Rik|C630030D09|F8VWF|VWD	Von Willebrand factor	protein-coding
12284	chr12	58426096	58426656	+	6.11	7.04	2.76	4.28	1.1e-13	1.05e-12	0	NA	Intergenic	Intergenic	-157118	NM_025809	66864	Mm.280563	NM_025809	ENSMUSG00000045930	Clec14a	1200003C23Rik|AI642649	C-type lectin domain family 14	member a	protein-coding
14793	chr9	45915612	45916043	+	5.99	6.92	2.64	4.28	2.35e-12	1.86e-11	0	NA	intron (NR_104055	intron 8 of 17)	intron (NR_104055	intron 8 of 17)	-8916	NM_178709	235315	Mm.220945	NM_178709	ENSMUSG00000042790	Rnf214	D130054N24Rik	ring finger protein 214	protein-coding
18773	chr1	152255426	152255860	+	5.59	6.52	2.24	4.28	9.78e-11	6.1e-10	0	NA	Intergenic	Intergenic	131039	NM_025677	66637	Mm.379120	NM_025677	ENSMUSG00000014980	Tsen15	5730449L18Rik|AL023077|Sen15	tRNA splicing endonuclease subunit 15	protein-coding
20706	chr9	67116046	67116323	+	5.33	6.26	1.98	4.28	4.15e-10	2.35e-09	0	NA	Intergenic	Intergenic	13884	NR_153957	102632690	Mm.387246	NR_153957		Gm10646	-	predicted gene 10646	ncRNA
20862	chr7	128089212	128089455	+	5.54	6.46	2.18	4.28	4.64e-10	2.61e-09	0	NA	intron (NM_008401	intron 12 of 29)	L1M2|LINE|L1	26693	NM_008401	16409	Mm.262106	NM_008401	ENSMUSG00000030786	Itgam	CD11b/CD18|CR3|CR3A|Cd11b|F730045J24Rik|Ly-40|MAC1|Mac-1|Mac-1a	integrin alpha M	protein-coding
22654	chr12	85527028	85527381	+	5.19	6.12	1.84	4.28	1.51e-09	7.83e-09	0	NA	Intergenic	Lx8|LINE|L1	53314	NM_010234	14281	Mm.246513	NM_010234	ENSMUSG00000021250	Fos	D12Rfj1|c-fos|cFos	FBJ osteosarcoma oncogene	protein-coding
22758	chr1	77489477	77489754	+	5.2	6.13	1.85	4.28	1.63e-09	8.41e-09	0	NA	intron (NM_007936	intron 3 of 17)	intron (NM_007936	intron 3 of 17)	7153	NR_105770	102465180		NR_105770	ENSMUSG00000099141	Mir6352	Gm27481|mmu-mir-6352	microRNA 6352	ncRNA
23933	chr12	31067291	31067621	+	5.18	6.11	1.83	4.28	3.26e-09	1.6e-08	0	NA	Intergenic	Intergenic	-6512	NM_027828	104943	Mm.248938	NM_027828	ENSMUSG00000036136	Fam110c	9030611O19Rik|AU019489	family with sequence similarity 110	member C	protein-coding
24789	chr19	30613255	30613560	+	5.2	6.12	1.84	4.28	5.29e-09	2.5e-08	0	NA	intron (NM_001013833	intron 10 of 17)	intron (NM_001013833	intron 10 of 17)	-63911	NM_010051	13380	Mm.214717	NM_010051	ENSMUSG00000024868	Dkk1	mdkk-1	dickkopf WNT signaling pathway inhibitor 1	protein-coding
26835	chr18	32335572	32335949	+	5.01	5.93	1.65	4.28	1.58e-08	6.88e-08	0	NA	Intergenic	L1M4a2|LINE|L1	-41457	NM_009668	30948	Mm.4383	NM_009668	ENSMUSG00000024381	Bin1	ALP-1|Amphl|BRAMP-2|SH3P9	bridging integrator 1	protein-coding
29020	chr10	100460603	100460854	+	4.99	5.91	1.64	4.28	4.61e-08	1.86e-07	0	NA	intron (NM_001033332	intron 8 of 12)	intron (NM_001033332	intron 8 of 12)	26619	NM_001110013	237500	Mm.296805	NM_001033332	ENSMUSG00000036676	Tmtc3	9130014E20Rik|B130008E12Rik|mSmile	transmembrane and tetratricopeptide repeat containing 3	protein-coding
33876	chr12	32057560	32057768	+	4.61	5.54	1.26	4.28	3.53e-07	1.22e-06	0	NA	intron (NM_011158	intron 1 of 10)	intron (NM_011158	intron 1 of 10)	3615	NM_011158	19088	Mm.25594	NM_011158	ENSMUSG00000002997	Prkar2b	AI451071|AW061005|PKARIIbeta|Pkarb2|RII(beta)	protein kinase	cAMP dependent regulatory	type II beta	protein-coding
35881	chr7	134043708	134043976	+	4.64	5.56	1.28	4.28	7.45e-07	2.43e-06	0	NA	intron (NM_007400	intron 3 of 22)	intron (NM_007400	intron 3 of 22)	181255	NM_007400	11489	Mm.439714	NM_007400	ENSMUSG00000054555	Adam12	Mltna	a disintegrin and metallopeptidase domain 12 (meltrin alpha)	protein-coding
370	chr12	102426076	102426881	+	8.31	9.24	4.97	4.27	1.61e-48	5.1e-46	0	NA	intron (NM_011175	intron 1 of 13)	intron (NM_011175	intron 1 of 13)	13335	NM_011175	19141	Mm.17185	NM_011175	ENSMUSG00000021190	Lgmn	AEP|AI746452|AU022324|Prsc1	legumain	protein-coding
535	chr3	55307346	55308099	+	8.32	9.25	4.98	4.27	3.22e-44	7.05e-42	0	NA	intron (NM_001357475	intron 3 of 16)	intron (NM_001357475	intron 3 of 16)	65358	NM_019978	13175	Mm.393242	NM_019978	ENSMUSG00000027797	Dclk1	1700113D08Rik|2810480F11Rik|AI836758|Click-I|Cpg16|Dcamkl1|Dcl|Dclk|mKIAA0369	doublecortin-like kinase 1	protein-coding
593	chr2	115970134	115971157	+	8.1	9.03	4.76	4.27	5.31e-43	1.05e-40	0	NA	intron (NM_001346056	intron 8 of 12)	intron (NM_001346056	intron 8 of 12)	93974	NM_001346055	17536	Mm.247566	NM_010825	ENSMUSG00000027210	Meis2	A430109D20Rik|Mrg1|Stra10	Meis homeobox 2	protein-coding
922	chr1	52765019	52766133	+	7.99	8.92	4.65	4.27	3.14e-38	3.99e-36	0	NA	Intergenic	B2_Mm2|SINE|B2	-38218	NM_001357464	98682	Mm.491173	NM_133829	ENSMUSG00000041439	Mfsd6	2210010L05Rik|9630025I22Rik|AI836200|AW212394|MMR2	major facilitator superfamily domain containing 6	protein-coding
1205	chr5	144771898	144773039	+	7.97	8.89	4.62	4.27	7.89e-35	7.68e-33	0	NA	intron (NM_001081362	intron 3 of 70)	MTA_Mm|LTR|ERVL-MaLR	3676	NM_001081362	100683	Mm.273570	NM_001081362	ENSMUSG00000045482	Trrap	AI481500	transformation/transcription domain-associated protein	protein-coding
5800	chr19	38023262	38024023	+	7.07	8	3.73	4.27	1.26e-19	2.56e-18	0	NA	intron (NM_001302140	intron 2 of 53)	intron (NM_001302140	intron 2 of 53)	19935	NM_001099634	226101	Mm.34674	NM_177035	ENSMUSG00000048612	Myof	2310004N10Rik|2310051D19Rik|E030042N20Rik|Fer1l3	myoferlin	protein-coding
6434	chr16	17542471	17543164	+	6.66	7.58	3.32	4.27	8.12e-19	1.48e-17	0	NA	Intergenic	Intergenic	-11765	NM_026909	69009	Mm.10174	NM_026909	ENSMUSG00000022760	Thap7	1810004B07Rik	THAP domain containing 7	protein-coding
6512	chr4	6870399	6870876	+	6.59	7.52	3.25	4.27	1.03e-18	1.85e-17	0	NA	intron (NM_145711	intron 1 of 8)	intron (NM_145711	intron 1 of 8)	120086	NM_145711	252838	Mm.435828	NM_145711	ENSMUSG00000041272	Tox	1700007F02Rik	thymocyte selection-associated high mobility group box	protein-coding
7696	chr7	126470139	126470602	+	6.61	7.53	3.27	4.27	2.58e-17	3.92e-16	0	NA	intron (NR_110346	intron 4 of 9)	intron (NR_110346	intron 4 of 9)	2724	NR_110346	20399	Mm.8538	NM_011363	ENSMUSG00000030733	Sh2b1	AI425885|C530001K22Rik|Irip|Psm|SH2-B|SH2-Bb|Sh2bpsm1|mKIAA1299	SH2B adaptor protein 1	protein-coding
7970	chr19	28518158	28519067	+	6.89	7.82	3.55	4.27	4.94e-17	7.26e-16	0	NA	intron (NM_175459	intron 4 of 10)	intron (NM_175459	intron 4 of 10)	-159612	NR_045330	320176	Mm.406716	NR_045330	ENSMUSG00000097735	D930032P07Rik	-	RIKEN cDNA D930032P07 gene	ncRNA
8694	chr12	32099605	32100128	+	6.36	7.29	3.01	4.27	2.57e-16	3.46e-15	0	NA	Intergenic	Intergenic	-38587	NM_011158	19088	Mm.25594	NM_011158	ENSMUSG00000002997	Prkar2b	AI451071|AW061005|PKARIIbeta|Pkarb2|RII(beta)	protein kinase	cAMP dependent regulatory	type II beta	protein-coding
9029	chr13	74822101	74822491	+	6.34	7.27	2.99	4.27	5.08e-16	6.59e-15	0	NA	Intergenic	Intergenic	-13536	NM_001301153	12380	Mm.29163	NM_009817	ENSMUSG00000021585	Cast	-	calpastatin	protein-coding
9169	chr16	15680403	15680941	+	6.63	7.56	3.29	4.27	6.46e-16	8.26e-15	0	NA	intron (NM_011159	intron 21 of 85)	ORR1D2|LTR|ERVL-MaLR	42806	NM_011159	19090	Mm.71	NM_011159	ENSMUSG00000022672	Prkdc	AI326420|AU019811|DNA-PKcs|DNAPDcs|DNAPK|DNPK1|DOXNPH|HYRC1|XRCC7|dxnph|p460|scid|slip	protein kinase	DNA activated	catalytic polypeptide	protein-coding
13408	chrX	93700725	93701151	+	5.83	6.75	2.49	4.27	4.73e-13	4.13e-12	0	NA	intron (NM_211138	intron 1 of 7)	intron (NM_211138	intron 1 of 7)	25826	NM_211138	236899	Mm.166467	NM_177546	ENSMUSG00000035246	Pcyt1b	AW045697|CTTbeta	phosphate cytidylyltransferase 1	choline	beta isoform	protein-coding
15299	chr11	105265067	105265329	+	5.7	6.63	2.36	4.27	4.13e-12	3.16e-11	0	NA	intron (NM_001361996	intron 14 of 19)	intron (NM_001361996	intron 14 of 19)	-27448	NM_008626	17534	Mm.235616	NM_008626	ENSMUSG00000020695	Mrc2	Endo180|mKIAA0709|uPARAP	mannose receptor	C type 2	protein-coding
15306	chr5	31935989	31936349	+	5.7	6.63	2.36	4.27	4.13e-12	3.17e-11	0	NA	intron (NM_144541	intron 7 of 11)	B2_Mm1t|SINE|B2	-200303	NM_008037	14284	Mm.24684	NM_008037	ENSMUSG00000029135	Fosl2	Fra-2	fos-like antigen 2	protein-coding
18363	chr2	50462392	50462738	+	5.62	6.55	2.27	4.27	7.07e-11	4.52e-10	0	NA	Intergenic	Intergenic	107540	NR_154590	102634280		NR_154590		Gm48908	-	predicted gene 48908	ncRNA
19091	chr19	30780861	30781176	+	5.48	6.41	2.14	4.27	1.24e-10	7.64e-10	0	NA	intron (NM_001013833	intron 7 of 17)	ORR1B1|LTR|ERVL-MaLR	149944	NR_033643	625995	Mm.454508	NR_033643		Gm6642	EG625995	ubiquitin-like 5 pseudogene	pseudo
22273	chr12	91838287	91838689	+	5.44	6.36	2.09	4.27	1.18e-09	6.19e-09	0	NA	intron (NM_001039089	intron 3 of 20)	MER68-int|LTR|ERVL	10669	NM_001039089	20338	Mm.250605	NM_011344	ENSMUSG00000020964	Sel1l	AW493766|Sel1h|mKIAA4137	sel-1 suppressor of lin-12-like (C. elegans)	protein-coding
32744	chr12	17184287	17184880	+	8.22	9.15	4.87	4.27	2.27e-07	8.12e-07	0	NA	Intergenic	Intergenic	-7695	NM_201531	382571	Mm.40173	NM_201531	ENSMUSG00000051726	Kcnf1	Gm1182|Kv5.1	potassium voltage-gated channel	subfamily F	member 1	protein-coding
34573	chr6	143862630	143862924	+	4.61	5.53	1.26	4.27	4.56e-07	1.55e-06	0	NA	intron (NM_001113559	intron 9 of 13)	intron (NM_001113559	intron 9 of 13)	84329	NM_001347506	20678	Mm.1752	NM_011444	ENSMUSG00000041540	Sox5	A730017D01Rik|AI528773	SRY (sex determining region Y)-box 5	protein-coding
39947	chr6	13919551	13919810	+	4.35	5.28	1.01	4.27	2.81e-06	8.26e-06	0	NA	Intergenic	Intergenic	48111	NR_045995	76311	Mm.367129	NR_045995	ENSMUSG00000097616	1110019D14Rik	-	RIKEN cDNA 1110019D14 gene	ncRNA
50123	chr4	53332085	53332311	+	4.05	4.97	0.71	4.27	4.01e-05	9.38e-05	0	NA	Intergenic	MERVL-int|LTR|ERVL	-61966	NR_033139	381524	Mm.23351	NM_001033454	ENSMUSG00000086712	AI427809	Gm1659	expressed sequence AI427809	ncRNA
57724	chr10	85755844	85756525	+	7.06	7.99	3.72	4.27	0.000198	0.000401	0.000401	NA	Intergenic	MERVL-int|LTR|ERVL	-115647	NM_133993	103136	Mm.18834	NM_133993	ENSMUSG00000001785	Pwp1	2310058A11Rik|2610205J09Rik|AI098170|AL022879|AV083409|AW550690	PWP1 homolog	endonuclein	protein-coding
795	chr6	91207427	91208375	+	8.02	8.94	4.68	4.26	1.06e-39	1.56e-37	0	NA	Intergenic	Intergenic	-4863	NM_007992	14115	Mm.249146	NM_007992	ENSMUSG00000064080	Fbln2	5730577E14Rik|FIBL-2	fibulin 2	protein-coding
1309	chr8	46429554	46430397	+	7.88	8.81	4.54	4.26	6.09e-34	5.45e-32	0	NA	Intergenic	Intergenic	-41062	NM_007981	14081	Mm.210323	NM_007981	ENSMUSG00000018796	Acsl1	Acas|Acas1|Acs|FACS|Facl2|LACS 1|LACS1	acyl-CoA synthetase long-chain family member 1	protein-coding
1936	chr9	43010861	43011695	+	7.58	8.51	4.25	4.26	9.23e-30	5.59e-28	0	NA	intron (NM_001359232	intron 11 of 40)	RMER15|LTR|ERVL	-66907	NM_175481	110637	Mm.370291	NM_175481	ENSMUSG00000032017	Grik4	6330551K01Rik|GluK4|GluRgamma1|KA-1|KA1	glutamate receptor	ionotropic	kainate 4	protein-coding
2127	chr8	124339737	124340926	+	7.97	8.9	4.63	4.26	8.08e-29	4.45e-27	0	NA	intron (NM_139272	intron 14 of 15)	intron (NM_139272	intron 14 of 15)	93605	NM_171824	209966	Mm.234233	NM_171824	ENSMUSG00000050751	Pgbd5	2900019M05Rik|AI854313	piggyBac transposable element derived 5	protein-coding
2131	chr3	145420426	145421019	+	7.55	8.47	4.21	4.26	8.76e-29	4.82e-27	0	NA	intron (NM_027770	intron 24 of 59)	B3|SINE|B2	128250	NM_001317733	71355	Mm.235570	NM_027770	ENSMUSG00000028197	Col24a1	5430404K19Rik	collagen	type XXIV	alpha 1	protein-coding
5230	chr9	95813713	95814409	+	6.86	7.79	3.52	4.26	1.89e-20	4.24e-19	0	NA	intron (NM_001033210	intron 1 of 15)	intron (NM_001033210	intron 1 of 15)	31218	NM_001033210	102502	Mm.11869	NM_001033210	ENSMUSG00000049493	Pls1	AI427122	plastin 1 (I-isoform)	protein-coding
6068	chr2	83676104	83676804	+	6.98	7.91	3.65	4.26	2.78e-19	5.38e-18	0	NA	Intergenic	Intergenic	31876	NM_026934	69082	Mm.27804	NM_026934	ENSMUSG00000027091	Zc3h15	1700006A17Rik|1810012H02Rik|2610312B22Rik|FM22|Ierepo4	zinc finger CCCH-type containing 15	protein-coding
6184	chr7	103860954	103861419	+	7.14	8.07	3.81	4.26	3.88e-19	7.35e-18	0	NA	Intergenic	Intergenic	-7979	NM_008221	15135	Mm.440164	NM_008221	ENSMUSG00000052187	Hbb-y	Ey|Hby	hemoglobin Y	beta-like embryonic chain	protein-coding
6323	chr13	32370618	32371302	+	6.78	7.71	3.45	4.26	6.11e-19	1.13e-17	0	NA	Intergenic	Intergenic	-32416	NM_146041	218138	Mm.247143	NM_146041	ENSMUSG00000038372	Gmds	BC031788|C87208	GDP-mannose 4	6-dehydratase	protein-coding
6325	chr9	23025303	23025783	+	6.84	7.77	3.51	4.26	6.09e-19	1.13e-17	0	NA	Intergenic	Intergenic	-197533	NM_028472	73230	Mm.335020	NM_028472	ENSMUSG00000031963	Bmper	3110056H04Rik|CV-2|Crim3|Cv2	BMP-binding endothelial regulator	protein-coding
6877	chr11	74965331	74966188	+	6.6	7.52	3.26	4.26	3.06e-18	5.22e-17	0	NA	intron (NM_001002764	intron 8 of 18)	intron (NM_001002764	intron 8 of 18)	39887	NM_001002764	103677	Mm.288460	NM_001002764	ENSMUSG00000038290	Smg6	AI317223|AU041178	Smg-6 homolog	nonsense mediated mRNA decay factor (C. elegans)	protein-coding
7455	chr1	72068982	72069453	+	6.53	7.46	3.19	4.26	1.4e-17	2.21e-16	0	NA	Intergenic	L1ME2|LINE|L1	-64022	NR_040454	71134	Mm.370574	NR_040454	ENSMUSG00000101848	4933417E11Rik	-	RIKEN cDNA 4933417E11 gene	ncRNA
7900	chr11	3633963	3634658	+	6.47	7.4	3.14	4.26	4.11e-17	6.1e-16	0	NA	Intergenic	Intergenic	13226	NR_110490	544752	Mm.390314	NR_002321	ENSMUSG00000056579	Tug1	AI316828	taurine upregulated gene 1	ncRNA
10772	chr1	168435348	168435754	+	6.09	7.02	2.76	4.26	1.1e-14	1.2e-13	0	NA	Intergenic	Intergenic	-3382	NM_183355	18514	Mm.43358	NM_008783	ENSMUSG00000052534	Pbx1	2310056B04Rik|D230003C07Rik|Pbx-1	pre B cell leukemia homeobox 1	protein-coding
11573	chr19	60138885	60139223	+	6	6.93	2.66	4.26	3.74e-14	3.79e-13	0	NA	Intergenic	Intergenic	-5621	NR_026942	107376	Mm.245813	NR_026942	ENSMUSG00000053117	E330013P04Rik	9930018I18Rik|AW492152	RIKEN cDNA E330013P04 gene	ncRNA
11658	chr11	78382677	78383079	+	6.16	7.08	2.82	4.26	4.3e-14	4.32e-13	0	NA	intron (NM_008238	intron 1 of 8)	intron (NM_008238	intron 1 of 8)	3730	NM_008238	15218	Mm.4496	NM_008238	ENSMUSG00000002057	Foxn1	D11Bhm185e|Fkh19|HFH-11|Hfh11|Whn|nu|nude	forkhead box N1	protein-coding
12585	chr17	63993506	63993886	+	6.15	7.07	2.81	4.26	1.67e-13	1.55e-12	0	NA	intron (NM_001037997	intron 12 of 18)	intron (NM_001037997	intron 12 of 18)	55724	NM_008000	14158	Mm.23039	NM_008000	ENSMUSG00000000127	Fer	AV082135|C330004K01Rik|Fert|Fert2	fer (fms/fps related) protein kinase	protein-coding
12630	chr5	3868392	3868847	+	5.9	6.83	2.57	4.26	1.77e-13	1.64e-12	0	NA	Intergenic	LTR88b|LTR|Gypsy?	23446	NM_172879	242838	Mm.482273	NM_172879	ENSMUSG00000040367	Lrrd1	4932412H11Rik	leucine rich repeats and death domain containing 1	protein-coding
13632	chr13	21417426	21418020	+	5.89	6.82	2.56	4.26	6.32e-13	5.44e-12	0	NA	Intergenic	MMSAT4|Satellite|Satellite	-14968	NM_001145778	72739	Mm.296071	NM_023685	ENSMUSG00000021327	Zkscan3	2810435N07Rik|AA408594|AI132359|Skz1|Zf47|Zfp-47|Zfp306|Zfp307|mszf35	zinc finger with KRAB and SCAN domains 3	protein-coding
15707	chr10	94087367	94087722	+	5.97	6.89	2.64	4.26	6.23e-12	4.65e-11	0	NA	intron (NM_053072	intron 3 of 20)	intron (NM_053072	intron 3 of 20)	51543	NM_053072	13998	Mm.269596	NM_053072	ENSMUSG00000020021	Fgd6	AA123052|Etohd4|ZFYVE24	FYVE	RhoGEF and PH domain containing 6	protein-coding
17433	chr13	13404584	13404945	+	5.59	6.51	2.25	4.26	3.2e-11	2.15e-10	0	NA	Intergenic	Intergenic	-11140	NM_031999	83924	Mm.379269	NM_031999	ENSMUSG00000021306	Gpr137b	AI788917|AU016435|AW546472|C730041E01|C80550|C80741|D13Abb1e|Tm7sf1	G protein-coupled receptor 137B	protein-coding
18218	chr1	12276326	12276604	+	5.6	6.53	2.26	4.26	6.17e-11	3.97e-10	0	NA	Intergenic	Intergenic	-149521	NR_105759	102465961		NR_105759	ENSMUSG00000098555	Mir6341	Gm27262|mmu-mir-6341	microRNA 6341	ncRNA
19964	chr19	36269158	36269443	+	5.34	6.26	2	4.26	2.49e-10	1.46e-09	0	NA	Intergenic	Lx8|LINE|L1	-109767	NM_029508	76073	Mm.259180	NM_029508	ENSMUSG00000024805	Pcgf5	0610009F02Rik|1110054A01Rik|5830406C17Rik|5830443C21Rik|9530023M17Rik|AI324127	polycomb group ring finger 5	protein-coding
19992	chr1	45541166	45541538	+	5.33	6.26	2	4.26	2.54e-10	1.49e-09	0	NA	Intergenic	Intergenic	-38070	NM_007737	12832	Mm.10299	NM_007737	ENSMUSG00000026042	Col5a2	1110014L14Rik	collagen	type V	alpha 2	protein-coding
22622	chr9	30223566	30223909	+	5.3	6.22	1.97	4.26	1.48e-09	7.69e-09	0	NA	Intergenic	Intergenic	-203592	NM_028874	102607	Mm.35084	NM_028874	ENSMUSG00000031993	Snx19	3526401K03Rik|AI195321|AI848208|mKIAA0254	sorting nexin 19	protein-coding
35100	chr2	180959692	180959925	+	4.58	5.5	1.24	4.26	5.59e-07	1.87e-06	0	NA	Intergenic	RMER15|LTR|ERVL	-5109	NM_021426	58237	Mm.40361	NM_021426	ENSMUSG00000027574	Nkain4	AB030182|C030019F02Rik	Na+/K+ transporting ATPase interacting 4	protein-coding
41092	chrX	13398557	13398847	+	4.37	5.3	1.03	4.26	3.95e-06	1.13e-05	0	NA	Intergenic	L2a|LINE|L2	-68970	NM_173415	236690	Mm.90233	NM_173415	ENSMUSG00000051228	Nyx	CLNP|CSNB1|CSNB4|nob	nyctalopin	protein-coding
43294	chr7	128363945	128364130	+	4.3	5.23	0.97	4.26	7.27e-06	1.97e-05	0	NA	Intergenic	MT2B1|LTR|ERVL	54135	NM_026418	67865	Mm.18635	NM_026418	ENSMUSG00000030844	Rgs10	2310010N19Rik	regulator of G-protein signalling 10	protein-coding
280	chr5	146867109	146868595	+	8.88	9.8	5.55	4.25	8.75e-53	3.66e-50	0	NA	Intergenic	Intergenic	22781	NM_026864	68895	Mm.266978	NM_026864	ENSMUSG00000029641	Rasl11a	1110065D03Rik|AI852031	RAS-like	family 11	member A	protein-coding
1201	chr7	51723952	51724753	+	7.94	8.86	4.62	4.25	7.49e-35	7.31e-33	0	NA	Intergenic	MER44D|DNA|TcMar-Tigger	99715	NM_001355150	140919	Mm.256618	NM_080853	ENSMUSG00000030500	Slc17a6	2900073D12Rik|DNPI|VGLUT2	solute carrier family 17 (sodium-dependent inorganic phosphate cotransporter)	member 6	protein-coding
1490	chr3	103600795	103601798	+	8.23	9.15	4.9	4.25	1.64e-32	1.29e-30	0	NA	intron (NM_001276676	intron 3 of 6)	intron (NM_001276676	intron 3 of 6)	25170	NM_001276680	54524	Mm.88818	NM_018800	ENSMUSG00000027849	Syt6	3110037A08Rik|AW048930|sytVI	synaptotagmin VI	protein-coding
1510	chr4	100285390	100286499	+	8.13	9.06	4.81	4.25	2.42e-32	1.88e-30	0	NA	intron (NM_013845	intron 1 of 8)	intron (NM_013845	intron 1 of 8)	190153	NM_001312690	26563	Mm.57252	NM_013845	ENSMUSG00000035305	Ror1	2810404D04Rik|Ntrkr1	receptor tyrosine kinase-like orphan receptor 1	protein-coding
2595	chr13	17604525	17605126	+	7.4	8.33	4.08	4.25	8.17e-27	3.69e-25	0	NA	intron (NM_138654	intron 6 of 13)	intron (NM_138654	intron 6 of 13)	89940	NM_138654	192136	Mm.364180	NM_138654	ENSMUSG00000055137	Sugct	5033411D12Rik|D17907	succinyl-CoA glutarate-CoA transferase	protein-coding
4073	chr9	70631459	70632050	+	6.96	7.89	3.64	4.25	1.3e-22	3.73e-21	0	NA	intron (NM_172772	intron 3 of 8)	intron (NM_172772	intron 3 of 8)	25420	NM_172772	235461	Mm.170855	NM_172772	ENSMUSG00000042444	Mindy2	AI465301|B230380D07Rik|Fam63b|mKIAA1164	MINDY lysine 48 deubiquitinase 2	protein-coding
4524	chr6	114293202	114294217	+	7.71	8.63	4.38	4.25	9.91e-22	2.57e-20	0	NA	intron (NM_178703	intron 1 of 15)	intron (NM_178703	intron 1 of 15)	11074	NM_178703	232333	Mm.5260	NM_178703	ENSMUSG00000030310	Slc6a1	A730043E01|GABATHG|GABATR|GAT-1|Gabt|Gabt1|Gat1|XT-1|Xtrp1	solute carrier family 6 (neurotransmitter transporter	GABA)	member 1	protein-coding
5407	chr5	33955594	33956286	+	6.85	7.77	3.52	4.25	3.63e-20	7.87e-19	0	NA	Intergenic	Intergenic	-19682	NM_011914	24116	Mm.332320	NM_011914	ENSMUSG00000029111	Nelfa	Whsc2|Whsc2h	negative elongation factor complex member A	Whsc2	protein-coding
6497	chr8	26669476	26669994	+	6.97	7.9	3.65	4.25	9.88e-19	1.78e-17	0	NA	Intergenic	Intergenic	154688	NR_045904	72316	Mm.490534	NR_045904	ENSMUSG00000100335	2310008N11Rik	-	RIKEN cDNA 2310008N11 gene	ncRNA
6857	chr11	4633380	4633897	+	6.97	7.89	3.64	4.25	2.83e-18	4.84e-17	0	NA	Intergenic	Intergenic	-3627	NR_027797	327860	Mm.186065	NM_177799	ENSMUSG00000056288	Gm11961	-	predicted gene 11961	ncRNA
7003	chr1	156665789	156666470	+	7.05	7.98	3.73	4.25	4.34e-18	7.27e-17	0	NA	intron (NM_023141	intron 4 of 5)	Lx8b|LINE|L1	8210	NM_023141	30935	Mm.206737	NM_023141	ENSMUSG00000060519	Tor3a	Adir	torsin family 3	member A	protein-coding
11383	chr13	24094956	24095603	+	6.1	7.03	2.78	4.25	2.84e-14	2.92e-13	0	NA	intron (NM_026825	intron 21 of 37)	intron (NM_026825	intron 21 of 37)	-104065	NM_145399	214189	Mm.255667	NM_145399	ENSMUSG00000021337	Scgn	-	secretagogin	EF-hand calcium binding protein	protein-coding
12042	chr4	33467613	33468040	+	6.01	6.93	2.68	4.25	7.52e-14	7.32e-13	0	NA	intron (NM_001305273	intron 14 of 15)	intron (NM_001305273	intron 14 of 15)	29745	NR_106198	102465904		NR_106198	ENSMUSG00000098310	Mir8118	Gm27954|mmu-mir-8118	microRNA 8118	ncRNA
12515	chr3	64572247	64572724	+	6.09	7.01	2.77	4.25	1.49e-13	1.4e-12	0	NA	Intergenic	Lx7|LINE|L1	-12667	NM_001104619	667069	Mm.484956	NM_001104619	ENSMUSG00000090581	Vmn2r6	EG620718|EG667069	vomeronasal 2	receptor 6	protein-coding
12849	chr19	60459134	60459549	+	6.06	6.99	2.74	4.25	2.42e-13	2.21e-12	0	NA	Intergenic	Intergenic	8963	NM_201615	226278	Mm.377241	NM_201615	ENSMUSG00000045052	Prlhr	Gm339|Gpr10|Gr3|Prrpr	prolactin releasing hormone receptor	protein-coding
13654	chr17	64190116	64190581	+	6.14	7.07	2.82	4.25	6.48e-13	5.56e-12	0	NA	Intergenic	Intergenic	-139676	NR_130982	68771	Mm.443351	NR_130982		1110058D11Rik	-	RIKEN cDNA 1110058D11 gene	ncRNA
17651	chr12	119024123	119024594	+	5.84	6.77	2.52	4.25	3.85e-11	2.56e-10	0	NA	Intergenic	L1MB2|LINE|L1	-57937	NM_029961	77706	Mm.261496	NM_029961	ENSMUSG00000072791	Abcb5	9230106F14Rik	ATP-binding cassette	sub-family B (MDR/TAP)	member 5	protein-coding
19236	chr4	141202627	141202934	+	5.55	6.47	2.23	4.25	1.42e-10	8.65e-10	0	NA	3' UTR (NM_172518	exon 10 of 10)	3' UTR (NM_172518	exon 10 of 10)	-11176	NM_001081174	76166	Mm.271064	NM_001081174	ENSMUSG00000073733	Rsg1	6330545A04Rik|Gm723|b2b2804Clo|b2b2827Clo	REM2 and RAB-like small GTPase 1	protein-coding
24436	chr10	76121595	76121963	+	5.16	6.08	1.83	4.25	4.35e-09	2.09e-08	0	NA	Intergenic	L1MB4|LINE|L1	-10761	NM_023219	64454	Mm.155678	NM_023219	ENSMUSG00000020226	Slc5a4b	2010104G07Rik|SAAT1|SGLT3-b|SGLT3b|pSGLT2	solute carrier family 5 (neutral amino acid transporters	system A)	member 4b	protein-coding
35292	chrX	100696784	100697081	+	4.63	5.55	1.3	4.25	6.03e-07	2e-06	0	NA	intron (NM_008446	intron 16 of 29)	intron (NM_008446	intron 16 of 29)	-32915	NM_001358507	71584	Mm.283495	NM_023608	ENSMUSG00000019359	Gdpd2	9130017L10Rik|Gde3|Obdpf	glycerophosphodiester phosphodiesterase domain containing 2	protein-coding
40936	chr10	12931486	12931708	+	4.31	5.24	0.99	4.25	3.83e-06	1.1e-05	0	NA	Intergenic	Intergenic	-8470	NR_038027	320273	Mm.417706	NR_038027	ENSMUSG00000097378	B230208H11Rik	-	RIKEN cDNA B230208H11 gene	ncRNA
30	chr1	179041146	179042808	+	10.18	11.1	6.87	4.24	8.66e-86	3.38e-82	0	NA	intron (NM_027188	intron 10 of 11)	intron (NM_027188	intron 10 of 11)	476064	NM_027188	69726	Mm.222338	NM_027188	ENSMUSG00000055067	Smyd3	2410008A19Rik|Zmynd1	SET and MYND domain containing 3	protein-coding
880	chr15	58927411	58928094	+	8.02	8.95	4.71	4.24	1.33e-38	1.76e-36	0	NA	intron (NM_175151	intron 2 of 11)	intron (NM_175151	intron 2 of 11)	5978	NM_175151	69694	Mm.383230	NM_175151	ENSMUSG00000050891	Tatdn1	2310079P03Rik|CDA11	TatD DNase domain containing 1	protein-coding
952	chr9	89874129	89874994	+	8.01	8.94	4.7	4.24	9.94e-38	1.23e-35	0	NA	Intergenic	Intergenic	-35214	NM_001039655	19417	Mm.44561	NM_011245	ENSMUSG00000032356	Rasgrf1	AI844718|CDC25|CDC25Mm|Gnrp|Grf1|Grfbeta|P190-A|Ras-GRF1|p190|p190RhoGEF	RAS protein-specific guanine nucleotide-releasing factor 1	protein-coding
1743	chr14	106393679	106394478	+	7.81	8.74	4.5	4.24	7.19e-31	4.83e-29	0	NA	Intergenic	Intergenic	92442	NR_045938	73631	Mm.48862	NR_045938	ENSMUSG00000099794	1700128A07Rik	-	RIKEN cDNA 1700128A07 gene	ncRNA
2295	chr17	3419029	3419904	+	7.57	8.5	4.25	4.24	5.57e-28	2.85e-26	0	NA	intron (NM_011878	intron 3 of 26)	intron (NM_011878	intron 3 of 26)	22259	NM_011878	24001	Mm.137134	NM_011878	ENSMUSG00000023800	Tiam2	3000002F19Rik|STEF|mKIAA2016	T cell lymphoma invasion and metastasis 2	protein-coding
2356	chr4	134639098	134639921	+	7.46	8.39	4.15	4.24	8.67e-28	4.31e-26	0	NA	intron (NM_207237	intron 2 of 11)	intron (NM_207237	intron 2 of 11)	64781	NM_207237	230815	Mm.18905	NM_207237	ENSMUSG00000037306	Man1c1	AI593348	mannosidase	alpha	class 1C	member 1	protein-coding
2521	chr4	88935082	88936254	+	7.55	8.48	4.24	4.24	4.2e-27	1.95e-25	0	NA	intron (NR_132735	intron 1 of 2)	intron (NR_132735	intron 1 of 2)	6374	NR_132735	106557447	Mm.484668	NR_132734		LOC106557447	-	uncharacterized LOC106557447	ncRNA
2524	chr14	66257349	66258128	+	7.7	8.62	4.38	4.24	4.31e-27	2e-25	0	NA	intron (NM_001162366	intron 1 of 30)	intron (NM_001162366	intron 1 of 30)	23314	NM_001162365	19229	Mm.21613	NM_172498	ENSMUSG00000059456	Ptk2b	CADTK|CAKB|CAKbeta|E430023O05Rik|FADK2|FAK2|PYK2|Raftk	PTK2 protein tyrosine kinase 2 beta	protein-coding
2625	chr8	79678875	79679352	+	7.43	8.35	4.12	4.24	1.06e-26	4.73e-25	0	NA	Intergenic	Intergenic	32627	NM_015751	24015	Mm.5831	NM_015751	ENSMUSG00000058355	Abce1	C79080|Oabp|RLI|RNS41|RNS4I|Rnaseli	ATP-binding cassette	sub-family E (OABP)	member 1	protein-coding
2918	chr2	109406286	109407123	+	7.4	8.33	4.08	4.24	9.13e-26	3.67e-24	0	NA	Intergenic	Intergenic	125966	NM_139303	228421	Mm.274086	NM_139303	ENSMUSG00000027115	Kif18a	AU024633|B130001M12Rik|gcd2	kinesin family member 18A	protein-coding
3552	chr3	93025324	93026063	+	7.14	8.07	3.83	4.24	6.32e-24	2.09e-22	0	NA	Intergenic	Intergenic	-6632	NM_025420	66203	Mm.292457	NM_025420	ENSMUSG00000027912	Lce1m	1110059L13Rik|AI131654|Lce5a|Sprrl10	late cornified envelope 1M	protein-coding
3567	chr10	34507721	34508327	+	7.09	8.01	3.77	4.24	6.93e-24	2.28e-22	0	NA	intron (NM_001358769	intron 2 of 8)	intron (NM_001358769	intron 2 of 8)	24624	NM_001358769	14302	Mm.332432	NM_010237	ENSMUSG00000019779	Frk	BSK|BSK/IYK|C85044|GTK|RAK	fyn-related kinase	protein-coding
3877	chr18	34508099	34508559	+	7.09	8.02	3.78	4.24	4.34e-23	1.31e-21	0	NA	Intergenic	B3A|SINE|B2	-1506	NM_146084	225358	Mm.226899	NM_146084	ENSMUSG00000036501	Fam13b	2610024E20Rik|AW060714|AW546153	family with sequence similarity 13	member B	protein-coding
4133	chr13	31567385	31568172	+	7.19	8.11	3.87	4.24	1.79e-22	5.08e-21	0	NA	intron (NR_029439	intron 3 of 5)	intron (NR_029439	intron 3 of 5)	9608	NM_008239	15220	Mm.44235	NM_008239	ENSMUSG00000038415	Foxq1	HFH-1|Hfh1|Hfh1l|sa	forkhead box Q1	protein-coding
4473	chr17	42989980	42990515	+	6.95	7.87	3.64	4.24	8.36e-22	2.19e-20	0	NA	Intergenic	Intergenic	-26308	NM_178589	94185	Mm.200792	NM_178589	ENSMUSG00000023915	Tnfrsf21	AA959878|DR6|R74815|TR7	tumor necrosis factor receptor superfamily	member 21	protein-coding
5615	chr16	15293986	15294654	+	6.83	7.76	3.51	4.24	6.68e-20	1.4e-18	0	NA	Intergenic	Intergenic	300198	NM_023585	70620	Mm.235407	NM_023585	ENSMUSG00000022674	Ube2v2	1110021H13Rik|4632410D19Rik|5730524P06Rik|6820402M05|AI848315|C81524|MMS2	ubiquitin-conjugating enzyme E2 variant 2	protein-coding
6089	chr6	90588102	90588717	+	6.74	7.66	3.42	4.24	2.89e-19	5.55e-18	0	NA	intron (NM_001356412	intron 16 of 22)	L2|LINE|L2	-16471	NM_027868	71699	Mm.272633	NM_027868	ENSMUSG00000030089	Slc41a3	1010001P06Rik|AI480742|SLC41A1-L2	solute carrier family 41	member 3	protein-coding
6447	chr18	88835015	88835647	+	6.63	7.56	3.32	4.24	8.4e-19	1.53e-17	0	NA	Intergenic	Intergenic	58876	NM_018821	54607	Mm.91920	NM_018821	ENSMUSG00000056153	Socs6	1500012M23Rik|5830401B18Rik|AI447482|Cis4|Cish4|HSPC060|SOCS-4|SOCS-6|SSI4|STAI4|STATI4|Socs4	suppressor of cytokine signaling 6	protein-coding
6947	chr13	110913560	110914200	+	6.64	7.56	3.32	4.24	3.71e-18	6.26e-17	0	NA	Intergenic	Intergenic	-10034	NR_131194	102636142	Mm.417611	NR_131194		4930526H09Rik	-	RIKEN cDNA 4930526H09 gene	ncRNA
7071	chr2	130488533	130489037	+	6.63	7.55	3.32	4.24	5.3e-18	8.78e-17	0	NA	intron (NM_001355161	intron 1 of 21)	intron (NM_001355161	intron 1 of 21)	38507	NM_008980	19262	Mm.224246	NM_008980	ENSMUSG00000027303	Ptpra	Ptpa|Ptpalpha|Rptpalpha|Rptra|Rptralpha	protein tyrosine phosphatase	receptor type	A	protein-coding
7407	chr7	134113957	134116215	+	9.38	10.31	6.07	4.24	1.25e-17	1.97e-16	0	NA	intron (NM_007400	intron 3 of 22)	intron (NM_007400	intron 3 of 22)	110011	NM_007400	11489	Mm.439714	NM_007400	ENSMUSG00000054555	Adam12	Mltna	a disintegrin and metallopeptidase domain 12 (meltrin alpha)	protein-coding
7960	chr2	110156203	110156832	+	6.6	7.53	3.29	4.24	4.79e-17	7.05e-16	0	NA	Intergenic	RMER6C|LTR|ERVK	-106038	NR_040508	75517	Mm.363927	NR_040508	ENSMUSG00000086186	Ccdc34os	1700024P03Rik	coiled-coil domain containing 34	opposite strand	ncRNA
11687	chr9	53264239	53264755	+	6	6.92	2.69	4.24	4.49e-14	4.5e-13	0	NA	Intergenic	Intergenic	-16385	NM_029936	77591	Mm.133560	NM_029936	ENSMUSG00000053289	Ddx10	4632415A01Rik|AI646054	DEAD (Asp-Glu-Ala-Asp) box polypeptide 10	protein-coding
14485	chr10	72484477	72484916	+	6.12	7.05	2.8	4.24	1.7e-12	1.37e-11	0	NA	Intergenic	Intergenic	-170150	NM_025635	52696	Mm.62876	NM_025635	ENSMUSG00000019923	Zwint	2010007E07Rik|2600001N01Rik|D10Ertd749e|Zwint-1	ZW10 interactor	protein-coding
16965	chr2	156937894	156938276	+	5.59	6.52	2.28	4.24	2.09e-11	1.45e-10	0	NA	intron (NM_001355393	intron 9 of 15)	intron (NM_001355393	intron 9 of 15)	-50864	NM_001356495	77799	Mm.29264	NM_029983	ENSMUSG00000027636	Sla2	A930009E21Rik|AI430952|SLAP-2|SLAP2	Src-like-adaptor 2	protein-coding
20824	chr12	17913070	17913379	+	5.32	6.24	2	4.24	4.55e-10	2.56e-09	0	NA	Intergenic	Intergenic	222415	NM_001361645	53602	Mm.313619	NM_016677	ENSMUSG00000071379	Hpcal1	NVL-3|NVP-3|Nvp3|VILIP3|Vnsl3|Vsnl3	hippocalcin-like 1	protein-coding
21590	chr2	12170304	12170667	+	5.53	6.46	2.22	4.24	7.51e-10	4.08e-09	0	NA	intron (NM_001001309	intron 23 of 29)	(GA)n|Simple_repeat|Simple_repeat	-130761	NR_040353	338535	Mm.483275	NR_040353	ENSMUSG00000086843	E030013I19Rik	-	RIKEN cDNA E030013I19 gene	ncRNA
24081	chr6	72180881	72181401	+	5.28	6.21	1.97	4.24	3.54e-09	1.73e-08	0	NA	Intergenic	Intergenic	54436	NM_153778	71093	Mm.87449	NM_153778	ENSMUSG00000037621	Atoh8	4933425C05Rik|Hath6|Math6|bHLHa21|okadin	atonal bHLH transcription factor 8	protein-coding
24328	chr18	66013134	66013408	+	5.42	6.35	2.1	4.24	4.09e-09	1.97e-08	0	NA	Intergenic	L1_Mur3|LINE|L1	-10636	NM_027400	70361	Mm.290857	NM_027400	ENSMUSG00000041891	Lman1	2610020P13Rik|AI326273|AU043785|C730041J05|ERGIC53|F5F8D|MCFD1|MR60|P58|gp58	lectin	mannose-binding	1	protein-coding
24682	chr10	25694556	25695034	+	5.27	6.2	1.95	4.24	5e-09	2.38e-08	0	NA	Intergenic	Intergenic	142642	NR_045349	73803	Mm.258921	NR_045349	ENSMUSG00000112444	4930401C15Rik	-	RIKEN cDNA 4930401C15 gene	ncRNA
25101	chr13	16771575	16772002	+	5.17	6.1	1.85	4.24	6.27e-09	2.93e-08	0	NA	Intergenic	Intergenic	-748365	NR_155430	100503142	Mm.359204	NR_155430		B230303A05Rik	B230303A05|EG328191	U1 small nuclear ribonucleoprotein 1C pseudogene	pseudo
30772	chrX	106149515	106149832	+	4.81	5.74	1.49	4.24	1.01e-07	3.85e-07	0	NA	intron (NM_205820	intron 2 of 2)	intron (NM_205820	intron 2 of 2)	6398	NM_205820	279572	Mm.336203	NM_205820	ENSMUSG00000033777	Tlr13	AI666735|Gm713	toll-like receptor 13	protein-coding
31509	chr12	8181826	8182100	+	4.84	5.77	1.53	4.24	1.38e-07	5.12e-07	0	NA	Intergenic	URR1B|DNA|hAT-Charlie	-26144	NM_172401	68832	Mm.25608	NM_172401	ENSMUSG00000037669	Ldah	1110057K04Rik|mLDAH	lipid droplet associated hydrolase	protein-coding
33058	chr11	116379589	116379902	+	4.76	5.68	1.45	4.24	2.61e-07	9.25e-07	0	NA	intron (NM_027258	intron 2 of 18)	intron (NM_027258	intron 2 of 18)	33287	NM_027258	217340	Mm.426344	NM_027258	ENSMUSG00000052949	Rnf157	2610036E23Rik|A130073L17Rik|mKIAA1917	ring finger protein 157	protein-coding
34960	chr3	37700028	37700282	+	4.58	5.5	1.26	4.24	5.31e-07	1.78e-06	0	NA	Intergenic	Intergenic	24205	NM_198657	381438	Mm.490549	NM_198657	ENSMUSG00000058174	Gm5148	EG381438	predicted gene 5148	protein-coding
1188	chr11	121746674	121747606	+	7.8	8.73	4.5	4.23	5.69e-35	5.61e-33	0	NA	Intergenic	Intergenic	44713	NM_144797	210029	Mm.153566	NM_144797	ENSMUSG00000039208	Metrnl	9430048M07Rik|BC019776	meteorin	glial cell differentiation regulator-like	protein-coding
2338	chr6	88963877	88964570	+	7.37	8.3	4.07	4.23	7.51e-28	3.77e-26	0	NA	Intergenic	Intergenic	61972	NM_011906	24100	Mm.284480	NM_011906	ENSMUSG00000002871	Tpra1	40kDa|Gpr175|Tpra40	transmembrane protein	adipocyte asscociated 1	protein-coding
2452	chr7	144233446	144234052	+	7.55	8.47	4.24	4.23	2.26e-27	1.08e-25	0	NA	intron (NM_001113373	intron 4 of 15)	intron (NM_001113373	intron 4 of 15)	-50636	NM_001081370	210274	Mm.483624	NM_001081370	ENSMUSG00000037541	Shank2	ProSAP1|mKIAA1022	SH3 and multiple ankyrin repeat domains 2	protein-coding
3463	chr17	78409836	78410360	+	7.14	8.07	3.84	4.23	3.91e-24	1.32e-22	0	NA	intron (NM_001360407	intron 2 of 9)	intron (NM_001360407	intron 2 of 9)	8054	NM_001285940	225020	Mm.236835	NM_199448	ENSMUSG00000056121	Fez2	9030616F16|D17Ertd315e	fasciculation and elongation protein zeta 2 (zygin II)	protein-coding
4117	chr16	87412095	87412876	+	7.09	8.01	3.78	4.23	1.69e-22	4.81e-21	0	NA	exon (NM_001081068	exon 12 of 30)	exon (NM_001081068	exon 12 of 30)	20121	NM_001081068	78913	Mm.249005	NM_001081068	ENSMUSG00000052299	Ltn1	4930528H02Rik|AV266914|C87237|Listerin|Rnf160|Zfp294	listerin E3 ubiquitin protein ligase 1	protein-coding
5517	chr8	122227207	122227735	+	7.3	8.23	4	4.23	4.94e-20	1.05e-18	0	NA	Intergenic	Intergenic	-54670	NM_009569	22761	Mm.3105	NM_009569	ENSMUSG00000049577	Zfpm1	FOG|Fog1	zinc finger protein	multitype 1	protein-coding
6417	chr8	106529821	106530268	+	6.74	7.67	3.44	4.23	7.65e-19	1.4e-17	0	NA	intron (NM_007665	intron 2 of 15)	intron (NM_007665	intron 2 of 15)	19192	NM_007665	12560	Mm.4658	NM_007665	ENSMUSG00000061048	Cdh3	AI385538|Cadp|Cdhp|P-cadherin|Pcad	cadherin 3	protein-coding
8965	chr5	146916859	146917211	+	6.59	7.52	3.29	4.23	4.55e-16	5.95e-15	0	NA	Intergenic	ORR1D2|LTR|ERVL-MaLR	-31622	NM_025652	66596	Mm.196528	NM_025652	ENSMUSG00000016503	Gtf3a	2010015D03Rik|2610111I01Rik|5330403M05Rik	general transcription factor III A	protein-coding
9585	chr6	149398049	149398726	+	6.24	7.17	2.94	4.23	1.49e-15	1.83e-14	0	NA	Intergenic	RLTR48A|LTR|ERV1	-10597	NM_001112796	12121	Mm.177181	NM_009753	ENSMUSG00000003452	Bicd1	B830009D06Rik|bic-D 1	BICD cargo adaptor 1	protein-coding
10330	chr16	49361673	49362304	+	6.51	7.44	3.2	4.23	5.47e-15	6.2e-14	0	NA	Intergenic	Intergenic	304502	NM_001166210	667772	Mm.301387	NM_001166210	ENSMUSG00000092009	Myh15	EG667772	myosin	heavy chain 15	protein-coding
11106	chr13	25608601	25609038	+	6.08	7.01	2.78	4.23	1.92e-14	2.03e-13	0	NA	Intergenic	Intergenic	-338823	NM_009513	22360	Mm.4766	NM_009513	ENSMUSG00000048978	Nrsn1	Neurensin-1|Neuro-p24|Vmp	neurensin 1	protein-coding
11955	chr6	125291370	125291784	+	6.33	7.26	3.03	4.23	6.6e-14	6.47e-13	0	NA	Intergenic	Intergenic	-5496	NM_009446	22144	Mm.270295	NM_009446	ENSMUSG00000067702	Tuba3a	AI528779|M[a]3|Tuba3	tubulin	alpha 3A	protein-coding
17160	chr3	59290617	59290940	+	5.65	6.58	2.35	4.23	2.5e-11	1.71e-10	0	NA	intron (NM_177855	intron 38 of 43)	intron (NM_177855	intron 38 of 43)	-27793	NM_001357008	70839	Mm.422675	NM_027571	ENSMUSG00000036353	P2ry12	2900079B22Rik|4921504D23Rik|P2Y12	purinergic receptor P2Y	G-protein coupled 12	protein-coding
17170	chr10	68968697	68969127	+	5.78	6.7	2.48	4.23	2.53e-11	1.73e-10	0	NA	Intergenic	Intergenic	-239640	NM_001252636	69288	Mm.26659	NM_001081347	ENSMUSG00000019944	Rhobtb1	1700008H16Rik|3110048G13Rik|AI173445|AI573858|AV350930	Rho-related BTB domain containing 1	protein-coding
19250	chr1	170025929	170026431	+	5.71	6.63	2.4	4.23	1.43e-10	8.7e-10	0	NA	intron (NM_022563	intron 2 of 16)	intron (NM_022563	intron 2 of 16)	56771	NR_040438	67303	Mm.396611	NR_040438	ENSMUSG00000097503	3110045C21Rik	AI838577	RIKEN cDNA 3110045C21 gene	ncRNA
19285	chr11	96602821	96603135	+	5.46	6.38	2.15	4.23	1.47e-10	8.95e-10	0	NA	intron (NM_001033186	intron 4 of 12)	intron (NM_001033186	intron 4 of 12)	138387	NM_001033186	78473	Mm.395840	NM_001033186	ENSMUSG00000057058	Skap1	1700091G21Rik|Scap1|Skap-55	src family associated phosphoprotein 1	protein-coding
19596	chr9	41790247	41790626	+	5.45	6.37	2.14	4.23	1.87e-10	1.12e-09	0	NA	Intergenic	Intergenic	208510	NR_029822	387236		NR_029822	ENSMUSG00000093354	Mir125b-1	Mirn125b|Mirn125b-1|mir-125b-1	microRNA 125b-1	ncRNA
21967	chr8	123888019	123888345	+	5.41	6.33	2.1	4.23	9.77e-10	5.22e-09	0	NA	Intergenic	Intergenic	6593	NM_009606	11459	Mm.214950	NM_009606	ENSMUSG00000031972	Acta1	AA959943|Acta-2|Acts|Actsk-1	actin	alpha 1	skeletal muscle	protein-coding
24342	chr15	52948231	52948633	+	5.27	6.19	1.97	4.23	4.1e-09	1.98e-08	0	NA	Intergenic	Intergenic	235987	NM_027212	69790	Mm.195562	NM_027212	ENSMUSG00000038622	Med30	1810038N03Rik|2510044J04Rik|TRAP25|Thrap6	mediator complex subunit 30	protein-coding
25757	chr6	93134017	93134273	+	5.15	6.07	1.84	4.23	8.94e-09	4.07e-08	0	NA	Intergenic	Intergenic	193563	NR_015530	330385	Mm.483472	NR_015530	ENSMUSG00000097462	9530026P05Rik	B430306B02	RIKEN cDNA 9530026P05 gene	ncRNA
26525	chr6	143365818	143366296	+	5.66	6.59	2.36	4.23	1.34e-08	5.91e-08	0	NA	Intergenic	RLTR18|LTR|ERVK	120169	NR_027803	52285	Mm.354898	NM_001033129		D6Ertd474e	1700001I24Rik|AU023129	DNA segment	Chr 6	ERATO Doi 474	expressed	ncRNA
27898	chrX	72940087	72940370	+	4.96	5.88	1.65	4.23	2.66e-08	1.12e-07	0	NA	intron (NM_010941	intron 3 of 7)	intron (NM_010941	intron 3 of 7)	21707	NM_010941	18194	Mm.38792	NM_010941	ENSMUSG00000031349	Nsdhl	AI747449|Bpa|H105E3|Str|XAP104	NAD(P) dependent steroid dehydrogenase-like	protein-coding
37283	chr19	43744361	43744631	+	4.53	5.46	1.23	4.23	1.2e-06	3.76e-06	0	NA	intron (NM_144874	intron 4 of 8)	ID_B1|SINE|B4	8504	NM_144874	226139	Mm.248237	NM_144874	ENSMUSG00000040018	Cox15	2900026G05Rik	cytochrome c oxidase assembly protein 15	protein-coding
42938	chr11	115574507	115574748	+	4.28	5.2	0.97	4.23	6.58e-06	1.8e-05	0	NA	intron (NM_001002929	intron 7 of 18)	MTC|LTR|ERVL-MaLR	10183	NM_001002929	445007	Mm.4379	NM_001002929	ENSMUSG00000020739	Nup85	Pcnt1|frount	nucleoporin 85	protein-coding
57992	chr8	123352775	123353288	+	6.64	7.56	3.34	4.23	0.000207	0.000419	0.000419	NA	intron (NM_172287	intron 2 of 14)	intron (NM_172287	intron 2 of 14)	20318	NM_172287	234857	Mm.150200	NM_172287	ENSMUSG00000010154	Spire2	BC026502|Spir-2|Spir2	spire type actin nucleation factor 2	protein-coding
60	chr1	159888566	159891271	+	9.57	10.49	6.28	4.22	1.71e-73	3.34e-70	0	NA	intron (NM_022312	intron 14 of 22)	intron (NM_022312	intron 14 of 22)	-154462	NM_001162896	67647	Mm.171518	NM_001024470	ENSMUSG00000090394	4930523C07Rik	-	RIKEN cDNA 4930523C07 gene	protein-coding
422	chr5	143271522	143272725	+	8.27	9.2	4.98	4.22	6.65e-47	1.85e-44	0	NA	Intergenic	Intergenic	-2101	NM_017467	54201	Mm.6666	NM_017467	ENSMUSG00000046658	Zfp316	Emzf1|Mzf3|Znf316	zinc finger protein 316	protein-coding
606	chr4	124808201	124809190	+	8.17	9.1	4.88	4.22	9.5e-43	1.84e-40	0	NA	intron (NM_008636	intron 2 of 10)	intron (NM_008636	intron 2 of 10)	6146	NM_008636	17764	Mm.272397	NM_008636	ENSMUSG00000028890	Mtf1	MTF-1|Thyls	metal response element binding transcription factor 1	protein-coding
650	chr19	37907289	37908549	+	8.37	9.29	5.07	4.22	5.52e-42	9.96e-40	0	NA	intron (NM_001302140	intron 48 of 53)	intron (NM_001302140	intron 48 of 53)	135658	NM_001099634	226101	Mm.34674	NM_177035	ENSMUSG00000048612	Myof	2310004N10Rik|2310051D19Rik|E030042N20Rik|Fer1l3	myoferlin	protein-coding
1389	chr14	76454808	76455955	+	8.05	8.98	4.76	4.22	2.89e-33	2.44e-31	0	NA	intron (NM_207652	intron 1 of 2)	intron (NM_207652	intron 1 of 2)	-33055	NM_001177751	21807	Mm.153272	NM_009366	ENSMUSG00000022010	Tsc22d1	AA589566|AW105905|Egr5|TSC-22|Tgfb1i4|Tsc|Tsc22	TSC22 domain family	member 1	protein-coding
1459	chr15	31184543	31185283	+	8.2	9.12	4.9	4.22	9.48e-33	7.62e-31	0	NA	Intergenic	Intergenic	-39472	NM_146057	223453	Mm.222867	NM_146057	ENSMUSG00000039168	Dap	4921531N22Rik|AI789753|AU040360	death-associated protein	protein-coding
1831	chr2	137706481	137707598	+	8.02	8.94	4.72	4.22	2.36e-30	1.51e-28	0	NA	Intergenic	Intergenic	-549545	NM_001025431	228662	Mm.153405	NM_145534	ENSMUSG00000062098	Btbd3	mKIAA0952	BTB (POZ) domain containing 3	protein-coding
2219	chr6	17549486	17550439	+	7.82	8.75	4.52	4.22	2.25e-28	1.19e-26	0	NA	intron (NM_008591	intron 15 of 21)	intron (NM_008591	intron 15 of 21)	86005	NM_008591	17295	Mm.86844	NM_008591	ENSMUSG00000009376	Met	AI838057|HGF|HGFR|Par4|c-Met	met proto-oncogene	protein-coding
2478	chr3	50736906	50737748	+	7.67	8.59	4.37	4.22	2.72e-27	1.29e-25	0	NA	Intergenic	Lx4A|LINE|L1	-293714	NM_011990	26570	Mm.260988	NM_011990	ENSMUSG00000027737	Slc7a11	9930009M05Rik|AI451155|sut|xCT	solute carrier family 7 (cationic amino acid transporter	y+ system)	member 11	protein-coding
2734	chr15	34350209	34351084	+	7.28	8.21	3.99	4.22	2.52e-26	1.08e-24	0	NA	intron (NM_001256161	intron 3 of 3)	intron (NM_001256161	intron 3 of 3)	7226	NM_001256161	77358	Mm.402759	NM_001256161	ENSMUSG00000094447	9430069I07Rik	-	RIKEN cDNA 9430069I07 gene	protein-coding
3336	chrX	19157452	19158158	+	7.15	8.07	3.85	4.22	1.58e-24	5.55e-23	0	NA	Intergenic	Intergenic	-10834	NR_029807	723828		NR_029807	ENSMUSG00000065471	Mir222	Mirn222|mir-222|mmu-mir-222	microRNA 222	ncRNA
3626	chr13	112446979	112447781	+	7.32	8.24	4.02	4.22	9.79e-24	3.17e-22	0	NA	Intergenic	Intergenic	-16690	NM_010560	16195	Mm.4364	NM_010560	ENSMUSG00000021756	Il6st	5133400A03Rik|AA389424|BB405851|CD130|D13Ertd699e|gp130	interleukin 6 signal transducer	protein-coding
4175	chr18	11417803	11418932	+	7.41	8.33	4.11	4.22	2.16e-22	6.08e-21	0	NA	Intergenic	Intergenic	-214909	NM_001252495	225182	Mm.154275	NM_175458	ENSMUSG00000041238	Rbbp8	9930104E21Rik|CtIP|RBBP-8|RIM|SAE2	retinoblastoma binding protein 8	endonuclease	protein-coding
4563	chr5	105941373	105942312	+	7.38	8.3	4.08	4.22	1.23e-21	3.15e-20	0	NA	Intergenic	MTC-int|LTR|ERVL-MaLR	65274	NM_018759	54367	Mm.248876	NM_018759	ENSMUSG00000029290	Zfp326	5730470H14Rik|ZAN75|Znf326	zinc finger protein 326	protein-coding
4927	chr9	58162920	58163643	+	7.3	8.23	4	4.22	5.6e-21	1.33e-19	0	NA	Intergenic	Intergenic	-4060	NM_012043	26968	Mm.367887	NM_012043	ENSMUSG00000037206	Islr	AW553146|Meflin	immunoglobulin superfamily containing leucine-rich repeat	protein-coding
5025	chr3	88210035	88210842	+	7.07	8	3.78	4.22	8.4e-21	1.96e-19	0	NA	Intergenic	Intergenic	-4733	NR_037276	100526540		NR_037276	ENSMUSG00000092988	Mir3093	mir-3093|mmu-mir-3093	microRNA 3093	ncRNA
5476	chr19	58165330	58166019	+	6.73	7.65	3.43	4.22	4.4e-20	9.42e-19	0	NA	Intergenic	Intergenic	114507	NR_049196	100885835		NR_049196	ENSMUSG00000093757	Mir5623	Gm26068|mir-5623|mmu-mir-5623	microRNA 5623	ncRNA
5573	chr7	92703375	92704073	+	6.82	7.74	3.52	4.22	5.85e-20	1.23e-18	0	NA	Intergenic	RLTR19B|LTR|ERVK	-33812	NM_029078	74737	Mm.288645	NM_029078	ENSMUSG00000041328	Pcf11	2500001H09Rik|5730417B17Rik|C77803	PCF11 cleavage and polyadenylation factor subunit	protein-coding
5761	chr12	16358762	16359437	+	6.84	7.76	3.55	4.22	1.11e-19	2.25e-18	0	NA	Intergenic	Intergenic	230671	NM_001130412	14245	Mm.153625	NM_015763	ENSMUSG00000020593	Lpin1	Lipin1|fld	lipin 1	protein-coding
6172	chr3	79816013	79816558	+	6.61	7.54	3.32	4.22	3.68e-19	6.99e-18	0	NA	intron (NM_027495	intron 11 of 11)	intron (NM_027495	intron 11 of 11)	26377	NM_027495	70652	Mm.46635	NM_027495	ENSMUSG00000027956	Tmem144	1110057I03Rik|5730537D05Rik	transmembrane protein 144	protein-coding
6284	chr2	141545648	141546312	+	6.66	7.58	3.37	4.22	5.39e-19	1.01e-17	0	NA	intron (NM_001013802	intron 6 of 18)	intron (NM_001013802	intron 6 of 18)	-874504	NM_178382	71436	Mm.426781	NM_178382	ENSMUSG00000051379	Flrt3	5530600M07Rik|C430047I10Rik|mKIAA1469	fibronectin leucine rich transmembrane protein 3	protein-coding
6324	chr13	100438627	100439284	+	6.82	7.74	3.51	4.22	6.1e-19	1.13e-17	0	NA	intron (NM_008670	intron 4 of 15)	B2_Mm2|SINE|B2	13909	NM_008670	17940	Mm.6898	NM_008670	ENSMUSG00000021640	Naip1	AV364616|Birc1a|D13Lsd1|Naip|Naip-rs1	NLR family	apoptosis inhibitory protein 1	protein-coding
7679	chr10	93933940	93934457	+	6.7	7.62	3.4	4.22	2.49e-17	3.8e-16	0	NA	Intergenic	Intergenic	29665	NR_029764	723908		NR_029764	ENSMUSG00000065607	Mir331	Mirn331|mmu-mir-331	microRNA 331	ncRNA
9664	chr7	104533025	104533606	+	6.22	7.14	2.92	4.22	1.76e-15	2.13e-14	0	NA	non-coding (NR_033673	exon 3 of 3)	non-coding (NR_033673	exon 3 of 3)	2046	NR_033673	625321	Mm.367236	NM_001037924	ENSMUSG00000073929	Trim30e-ps1	EG625321|Gm6577|Trim30-4	tripartite motif-containing 30E	pseudogene 1	pseudo
10296	chr12	74192556	74192988	+	6.53	7.46	3.24	4.22	5.2e-15	5.92e-14	0	NA	intron (NM_172804	intron 2 of 6)	intron (NM_172804	intron 2 of 6)	-91504	NR_030734	74284	Mm.287421	NR_030733	ENSMUSG00000071265	1700086L19Rik	1700006L05Rik|AU016007	RIKEN cDNA 1700086L19 gene	ncRNA
11029	chr4	88462530	88462908	+	6.06	6.99	2.77	4.22	1.7e-14	1.81e-13	0	NA	Intergenic	MTD|LTR|ERVL-MaLR	-23793	NM_025760	66775	Mm.386788	NM_025760	ENSMUSG00000028497	Hacd4	4933428I03Rik|Hcad4|Ptplad2	3-hydroxyacyl-CoA dehydratase 4	protein-coding
12376	chrX	56697439	56698191	+	6.14	7.06	2.84	4.22	1.24e-13	1.17e-12	0	NA	Intergenic	Intergenic	-33946	NM_010211	14199	Mm.3126	NM_010211	ENSMUSG00000023092	Fhl1	FHL-1|KyoT|RAM14-1|SLIM|SLIM-1	four and a half LIM domains 1	protein-coding
17685	chr1	184084864	184085315	+	5.76	6.68	2.46	4.22	3.96e-11	2.63e-10	0	NA	Intergenic	Intergenic	50708	NM_022019	63953	Mm.404024	NM_022019	ENSMUSG00000039384	Dusp10	2610306G15Rik|AI158871|MKP-5|MKP5	dual specificity phosphatase 10	protein-coding
18317	chr9	122660083	122660600	+	6.04	6.97	2.75	4.22	6.84e-11	4.38e-10	0	NA	Intergenic	Intergenic	-22535	NR_029819	387156		NR_029819	ENSMUSG00000065414	Mir138-1	Mirn138|Mirn138-1|mir-138-1	microRNA 138-1	ncRNA
21777	chr15	97041996	97042378	+	5.29	6.21	1.99	4.22	8.65e-10	4.66e-09	0	NA	intron (NM_027052	intron 1 of 15)	intron (NM_027052	intron 1 of 15)	-10974	NM_001358058	69354	Mm.250980	NM_027052	ENSMUSG00000022464	Slc38a4	1110012E16Rik|1700012A18Rik|Ata3|mATA3|mNAT3	solute carrier family 38	member 4	protein-coding
22044	chr4	129416514	129416909	+	5.51	6.44	2.22	4.22	1.02e-09	5.42e-09	0	NA	Intergenic	Intergenic	24107	NM_153541	215627	Mm.428660	NM_153541	ENSMUSG00000048485	Zbtb8b	AV220464|BC023839|BOZF1|Zbtb8	zinc finger and BTB domain containing 8b	protein-coding
28121	chr8	126199037	126199309	+	5.1	6.02	1.8	4.22	2.94e-08	1.23e-07	0	NA	Intergenic	Intergenic	-99406	NM_175434	210027	Mm.405238	NM_175434	ENSMUSG00000057060	Slc35f3	B230375D17Rik	solute carrier family 35	member F3	protein-coding
28771	chr11	51960095	51960506	+	5.32	6.24	2.02	4.22	4.1e-08	1.67e-07	0	NA	Intergenic	ORR1E|LTR|ERVL-MaLR	-7331	NM_029976	52626	Mm.289456	NM_029976	ENSMUSG00000020392	Cdkn2aipnl	A430101B06Rik|AA409260|D11Ertd497e|MNCb-1520	CDKN2A interacting protein N-terminal like	protein-coding
31605	chr2	132455925	132456171	+	4.79	5.71	1.49	4.22	1.43e-07	5.31e-07	0	NA	Intergenic	MTA_Mm|LTR|ERVL-MaLR	31307	NR_045802	70845	Mm.158461	NR_045802	ENSMUSG00000027345	4921508D12Rik	-	RIKEN cDNA 4921508D12 gene	ncRNA
31681	chrX	160164976	160165403	+	4.79	5.71	1.49	4.22	1.47e-07	5.44e-07	0	NA	Intergenic	Intergenic	-26759	NM_008810	18597	Mm.34775	NM_008810	ENSMUSG00000031299	Pdha1	Pdha-1	pyruvate dehydrogenase E1 alpha 1	protein-coding
43664	chr11	55292000	55292201	+	4.26	5.18	0.97	4.22	8.07e-06	2.17e-05	0	NA	intron (NM_001029988	intron 4 of 22)	intron (NM_001029988	intron 4 of 22)	20157	NM_001029988	245827	Mm.339363	NM_001029988	ENSMUSG00000055333	Fat2	EMI2|Fath2|Gm523|mKIAA0811	FAT atypical cadherin 2	protein-coding
63483	chr9	96380940	96382099	+	8.63	9.55	5.33	4.22	0.000573	0.00106	0.00106	NA	Intergenic	Intergenic	-17088	NM_007502	11933	Mm.424	NM_007502	ENSMUSG00000032412	Atp1b3	AA409958|AI664000|AW212096	ATPase	Na+/K+ transporting	beta 3 polypeptide	protein-coding
34	chr2	137204199	137205725	+	9.31	10.24	6.02	4.21	3.99e-84	1.38e-80	0	NA	Intergenic	MIR3|SINE|MIR	-88442	NM_013822	16449	Mm.22398	NM_013822	ENSMUSG00000027276	Jag1	ABE2|Gsfabe2|Htu|Ozz|Ser-1	jagged 1	protein-coding
212	chr1	182527361	182528820	+	9.11	10.04	5.83	4.21	4.98e-56	2.76e-53	0	NA	Intergenic	Intergenic	-10480	NM_009794	12334	Mm.19306	NM_009794	ENSMUSG00000026509	Capn2	AI326419|CALP80|Capa-2|Capa2|m-calpain|m-calpin	calpain 2	protein-coding
699	chr7	34341926	34342703	+	8.05	8.97	4.76	4.21	5.43e-41	9.11e-39	0	NA	Intergenic	Intergenic	47391	NM_001360654	67070	Mm.276503	NM_025948	ENSMUSG00000066568	Lsm14a	2700023B17Rik|AA407828|AU017544|Tral|mRAP55A	LSM14A mRNA processing body assembly factor	protein-coding
1908	chr8	54548221	54548806	+	8.13	9.05	4.84	4.21	6.04e-30	3.71e-28	0	NA	Intergenic	Intergenic	-1818	NM_029569	76294	Mm.33171	NM_029569	ENSMUSG00000031519	Asb5	1110018D09Rik	ankyrin repeat and SOCs box-containing 5	protein-coding
2195	chr10	21023041	21023765	+	7.7	8.62	4.41	4.21	1.65e-28	8.83e-27	0	NA	intron (NM_001358561	intron 17 of 22)	RMER1B|Other|Other	-17417	NM_001177776	52906	Mm.253280	NM_026203	ENSMUSG00000019986	Ahi1	1700015F03Rik|Ahi-1|D10Bwg0629e	Abelson helper integration site 1	protein-coding
2312	chr6	99478974	99479835	+	7.43	8.35	4.14	4.21	6.3e-28	3.2e-26	0	NA	intron (NM_001347345	intron 1 of 19)	intron (NM_001347345	intron 1 of 19)	41589	NM_001347345	108655	Mm.234965	NM_053202	ENSMUSG00000030067	Foxp1	3110052D19Rik|4932443N09Rik|AI461938|AW494214	forkhead box P1	protein-coding
2342	chr4	128837628	128838713	+	7.48	8.4	4.19	4.21	7.78e-28	3.89e-26	0	NA	Intergenic	Intergenic	-32058	NM_001081098	230761	Mm.22616	NM_001081098	ENSMUSG00000028799	Zfp362	-	zinc finger protein 362	protein-coding
2359	chr6	28473992	28475142	+	7.39	8.31	4.11	4.21	8.71e-28	4.33e-26	0	NA	Intergenic	Intergenic	-5781	NM_019776	56463	Mm.439987	NM_019776	ENSMUSG00000001424	Snd1	AL033314|Tudor-SN	staphylococcal nuclease and tudor domain containing 1	protein-coding
2845	chr17	70836702	70837237	+	7.32	8.24	4.03	4.21	5.26e-26	2.17e-24	0	NA	Intergenic	Tigger7|DNA|TcMar-Tigger	9808	NM_001164077	21815	Mm.101034	NM_009372	ENSMUSG00000047407	Tgif1	AA959811|AI462167|Tgif	TGFB-induced factor homeobox 1	protein-coding
2983	chr17	83081373	83082054	+	7.47	8.39	4.18	4.21	1.41e-25	5.55e-24	0	NA	Intergenic	Intergenic	-3488	NR_045094	100503434	Mm.187281	NR_045094		Gm19689	-	predicted gene	19689	ncRNA
3597	chr3	28734715	28735268	+	7.08	8.01	3.8	4.21	8.23e-24	2.68e-22	0	NA	Intergenic	Intergenic	37088	NM_031197	20526	Mm.18443	NM_031197	ENSMUSG00000027690	Slc2a2	AI266973|Glut-2|Glut2	solute carrier family 2 (facilitated glucose transporter)	member 2	protein-coding
4777	chr3	84238026	84239187	+	7.01	7.93	3.72	4.21	2.95e-21	7.23e-20	0	NA	intron (NM_001271726	intron 1 of 11)	ID4_|SINE|ID	-17729	NM_030706	80890	Mm.44876	NM_030706	ENSMUSG00000027993	Trim2	mKIAA0517|narf	tripartite motif-containing 2	protein-coding
6319	chr8	105186508	105186930	+	6.61	7.53	3.32	4.21	6.05e-19	1.12e-17	0	NA	intron (NM_001161458	intron 3 of 5)	intron (NM_001161458	intron 3 of 5)	16045	NM_001161456	12400	Mm.2018	NM_022309	ENSMUSG00000031885	Cbfb	AI893578|PEA2|PEBP2b|Pebp2|Pebpb2	core binding factor beta	protein-coding
7545	chr8	14013633	14014219	+	6.59	7.52	3.31	4.21	1.76e-17	2.73e-16	0	NA	Intergenic	Intergenic	14986	NR_131136	546036	Mm.31785	NR_131136	ENSMUSG00000110058	Gm5907	EG546036|Gm45519|Gm845	predicted gene 5907	ncRNA
9988	chr1	159253010	159253500	+	6.22	7.15	2.94	4.21	3.25e-15	3.81e-14	0	NA	intron (NM_011931	intron 6 of 19)	intron (NM_011931	intron 6 of 19)	21055	NM_001360878	26374	Mm.328135	NM_011931	ENSMUSG00000040782	Cop1	AI316802|C80879|Rfwd2	COP1	E3 ubiquitin ligase	protein-coding
10027	chr9	44039803	44040149	+	6.27	7.19	2.98	4.21	3.38e-15	3.95e-14	0	NA	Intergenic	Intergenic	-3408	NM_009382	21838	Mm.3951	NM_009382	ENSMUSG00000032011	Thy1	CD90|T25|Thy-1|Thy-1.2|Thy1.1|Thy1.2	thymus cell antigen 1	theta	protein-coding
11701	chr11	113596585	113597009	+	6.05	6.98	2.76	4.21	4.6e-14	4.6e-13	0	NA	Intergenic	MTA_Mm|LTR|ERVL-MaLR	-22684	NM_009217	20606		NM_009217	ENSMUSG00000047904	Sstr2	SRIF-1|SS2R|SSTR-2|Smstr-2|Smstr2|sst2	somatostatin receptor 2	protein-coding
18638	chr10	91092885	91093143	+	5.53	6.45	2.24	4.21	8.9e-11	5.6e-10	0	NA	intron (NM_026166	intron 1 of 2)	intron (NM_026166	intron 1 of 2)	9975	NM_026166	67454	Mm.252843	NM_026166	ENSMUSG00000019975	Ikbip	1200009F10Rik|1700023M03Rik|D18354|Ikip	IKBKB interacting protein	protein-coding
19432	chr12	17057057	17057406	+	5.57	6.5	2.29	4.21	1.65e-10	9.96e-10	0	NA	Intergenic	L1MC5|LINE|L1	-45504	NM_001201332	73667	Mm.159048	NM_001201332	ENSMUSG00000071398	2410004P03Rik	-	RIKEN cDNA 2410004P03 gene	protein-coding
19824	chr11	104631342	104631665	+	5.54	6.46	2.25	4.21	2.25e-10	1.33e-09	0	NA	intron (NM_016780	intron 2 of 14)	intron (NM_016780	intron 2 of 14)	23503	NM_016780	16416	Mm.87150	NM_016780	ENSMUSG00000020689	Itgb3	CD61|GP3A|INGRB3	integrin beta 3	protein-coding
21845	chr17	44770901	44771323	+	5.31	6.23	2.02	4.21	9.05e-10	4.86e-09	0	NA	intron (NM_001271627	intron 1 of 7)	intron (NM_001271627	intron 1 of 7)	-6054	NM_001357320	109115	Mm.431327	NM_178652	ENSMUSG00000038954	Supt3	2310066G22Rik|AI315192|SPT3|SPT3L|Supt3h	suppressor of Ty 3	protein-coding
22426	chr3	102374428	102374999	+	5.5	6.43	2.22	4.21	1.3e-09	6.78e-09	0	NA	Intergenic	L1MB5|LINE|L1	-95206	NM_013609	18049	Mm.1259	NM_013609	ENSMUSG00000027859	Ngf	Ngfb|beta-NGF	nerve growth factor	protein-coding
22643	chr3	60128910	60129172	+	5.3	6.22	2.01	4.21	1.5e-09	7.77e-09	0	NA	Intergenic	Intergenic	47172	NM_032400	84112	Mm.125110	NM_032400	ENSMUSG00000027762	Sucnr1	Gpr91	succinate receptor 1	protein-coding
27491	chr18	77686843	77687164	+	5	5.92	1.71	4.21	2.18e-08	9.31e-08	0	NA	intron (NM_178670	intron 1 of 4)	intron (NM_178670	intron 1 of 4)	27007	NM_178670	212163	Mm.23293	NM_178670	ENSMUSG00000047466	8030462N17Rik	Akd2|Ark2N	RIKEN cDNA 8030462N17 gene	protein-coding
31514	chrX	163858547	163858832	+	4.78	5.7	1.49	4.21	1.37e-07	5.12e-07	0	NA	Intergenic	Intergenic	-50328	NM_026887	108012	Mm.426783	NM_026887	ENSMUSG00000031367	Ap1s2	1500012A13Rik|AI853648|EST1	adaptor-related protein complex 1	sigma 2 subunit	protein-coding
34901	chr7	68319880	68320828	+	8.41	9.33	5.12	4.21	5.19e-07	1.74e-06	0	NA	intron (NM_001013811	intron 3 of 8)	intron (NM_001013811	intron 3 of 8)	-43760	NR_040340	100504026	Mm.426764	NR_040340	ENSMUSG00000086628	Gm16157	-	predicted gene 16157	ncRNA
49939	chr3	63137695	63138149	+	6.74	7.67	3.46	4.21	3.86e-05	9.05e-05	0	NA	Intergenic	Intergenic	-157289	NM_001357335	17380	Mm.296022	NM_008604	ENSMUSG00000027820	Mme	6030454K05Rik|C85356|CALLA|CD10|NEP|SFE	membrane metallo endopeptidase	protein-coding
66889	chr9	56744415	56744706	+	5.72	6.64	2.44	4.21	0.00106	0.00187	0.00187	NA	intron (NM_181074	intron 2 of 6)	intron (NM_181074	intron 2 of 6)	51750	NM_181074	235402	Mm.246605	NM_181074	ENSMUSG00000049556	Lingo1	4930471K13Rik|AV148400|LERN1|LINGO-1|Lrrn6a|UNQ201	leucine rich repeat and Ig domain containing 1	protein-coding
36	chr2	13557073	13559674	+	9.76	10.69	6.48	4.2	8.38e-83	2.73e-79	0	NA	Intergenic	Intergenic	-13709	NM_010067	13434	Mm.6979	NM_010067	ENSMUSG00000026723	Trdmt1	Dnmt2|Rnmt2	tRNA aspartic acid methyltransferase 1	protein-coding
70	chr7	24386793	24388072	+	8.98	9.91	5.71	4.2	3.85e-72	6.45e-69	0	NA	Intergenic	Intergenic	-12196	NM_028047	71997	Mm.150977	NM_028047	ENSMUSG00000002210	Smg9	1500002O20Rik|AI429693|N28092	smg-9 homolog	nonsense mediated mRNA decay factor (C. elegans)	protein-coding
1736	chr1	88525946	88526774	+	7.9	8.83	4.63	4.2	6.64e-31	4.48e-29	0	NA	Intergenic	Intergenic	-16294	NM_008132	14659	Mm.5187	NM_008132	ENSMUSG00000062310	Glrp1	GRP-1	glutamine repeat protein 1	protein-coding
2455	chr7	64276685	64277412	+	7.56	8.48	4.28	4.2	2.28e-27	1.09e-25	0	NA	Intergenic	MLT1G|LTR|ERVL-MaLR	-10622	NM_172742	233315	Mm.214959	NM_172742	ENSMUSG00000030522	Mtmr10	BB128963|C79734	myotubularin related protein 10	protein-coding
3182	chr4	136598261	136599012	+	7.43	8.35	4.15	4.2	6.01e-25	2.22e-23	0	NA	intron (NM_001356567	intron 1 of 19)	RMER6C|LTR|ERVK	4087	NM_001347221	99982	Mm.28540	NM_133872	ENSMUSG00000036940	Kdm1a	1810043O07Rik|AA408884|Aof2|D4Ertd478e|Kdm1|Lsd1|mKIAA0601	lysine (K)-specific demethylase 1A	protein-coding
5049	chr10	25271748	25272586	+	7.17	8.1	3.9	4.2	9.27e-21	2.15e-19	0	NA	intron (NM_018747	intron 3 of 7)	intron (NM_018747	intron 3 of 7)	26996	NM_018747	432442	Mm.485937	NM_018747	ENSMUSG00000039166	Akap7	6430401D08|AI662165|AKAP15|Akap18|BB170514	A kinase (PRKA) anchor protein 7	protein-coding
5914	chr11	95650873	95651545	+	6.97	7.89	3.69	4.2	1.8e-19	3.56e-18	0	NA	Intergenic	Intergenic	-15748	NM_008831	18673	Mm.263862	NM_008831	ENSMUSG00000038845	Phb	Bap32	prohibitin	protein-coding
7958	chr5	104056357	104056879	+	6.6	7.52	3.32	4.2	4.77e-17	7.03e-16	0	NA	intron (NM_028794	intron 4 of 7)	intron (NM_028794	intron 4 of 7)	8615	NR_049192	100885831		NR_049192	ENSMUSG00000093690	Mir5619	Gm23866|mir-5619|mmu-mir-5619	microRNA 5619	ncRNA
11566	chr4	138042053	138042503	+	6.25	7.17	2.97	4.2	3.69e-14	3.74e-13	0	NA	intron (NM_001355699	intron 1 of 32)	intron (NM_001355699	intron 1 of 32)	44453	NM_001355700	230861	Mm.268903	NM_172703	ENSMUSG00000028760	Eif4g3	1500002J22Rik|4930523M17Rik|G1-419-52|eIF4GII|repro8	eukaryotic translation initiation factor 4 gamma	3	protein-coding
12296	chr12	34040981	34041337	+	6.04	6.97	2.76	4.2	1.12e-13	1.07e-12	0	NA	Intergenic	L1M2|LINE|L1	83488	NM_011658	22160	Mm.3280	NM_011658	ENSMUSG00000035799	Twist1	M-Twist|Pde|Ska10|Ska<m10Jus>|Twist|bHLHa38|pdt	twist basic helix-loop-helix transcription factor 1	protein-coding
13716	chr1	153010523	153010971	+	5.92	6.85	2.65	4.2	6.92e-13	5.92e-12	0	NA	intron (NM_175460	intron 1 of 10)	intron (NM_175460	intron 1 of 10)	55646	NM_175460	226518	Mm.40548	NM_175460	ENSMUSG00000042751	Nmnat2	AI843915|D030041I09Rik|PNAT1|PNAT2	nicotinamide nucleotide adenylyltransferase 2	protein-coding
15094	chr19	57688284	57688604	+	5.76	6.68	2.49	4.2	3.29e-12	2.56e-11	0	NA	intron (NM_181415	intron 13 of 28)	MLT2B2|LTR|ERVL	77410	NM_181415	226255	Mm.245340	NM_181415	ENSMUSG00000054843	Atrnl1	AI504415|AW555641|Alp|Atrnl|Atrnlp	attractin like 1	protein-coding
18996	chr1	190836140	190836420	+	5.61	6.54	2.34	4.2	1.16e-10	7.13e-10	0	NA	intron (NM_178775	intron 7 of 14)	intron (NM_178775	intron 7 of 14)	75490	NM_178775	320119	Mm.220912	NM_178775	ENSMUSG00000089872	Rps6kc1	AA682037|B130003F20Rik|C80612|Rpk118	ribosomal protein S6 kinase polypeptide 1	protein-coding
24533	chr7	69876999	69877434	+	5.3	6.23	2.02	4.2	4.61e-09	2.2e-08	0	NA	Intergenic	Intergenic	381122	NR_045940	73796	Mm.410832	NR_045940	ENSMUSG00000108885	4930402F11Rik	-	RIKEN cDNA 4930402F11 gene	ncRNA
32504	chr4	109484652	109484950	+	4.74	5.66	1.46	4.2	2.06e-07	7.44e-07	0	NA	Intergenic	Intergenic	-8296	NM_013876	29864	Mm.392580	NM_013876	ENSMUSG00000028557	Rnf11	-	ring finger protein 11	protein-coding
36477	chr9	67974656	67974883	+	4.73	5.65	1.45	4.2	9.16e-07	2.94e-06	0	NA	intron (NM_177184	intron 79 of 84)	L1MB8|LINE|L1	50945	NR_045745	434412	Mm.490707	NR_045745	ENSMUSG00000111841	Gm20745	-	predicted gene	20745	ncRNA
43617	chr5	100607122	100608689	+	8.5	9.42	5.23	4.2	7.95e-06	2.14e-05	0	NA	Intergenic	Intergenic	-35700	NM_139198	231507	Mm.34609	NM_139198	ENSMUSG00000029322	Plac8	C15|D5Wsu111e	placenta-specific 8	protein-coding
46121	chr4	64024093	64024317	+	4.31	5.23	1.03	4.2	1.55e-05	3.94e-05	0	NA	intron (NM_011607	intron 1 of 25)	intron (NM_011607	intron 1 of 25)	22810	NM_011607	21923	Mm.980	NM_011607	ENSMUSG00000028364	Tnc	AI528729|C130033P17Rik|Hxb|TN|TN-C|Ten|cytotactin|tenascin-C	tenascin C	protein-coding
63795	chr9	55361842	55362960	+	7.52	8.44	4.25	4.2	0.000607	0.00112	0.00112	NA	intron (NM_172923	intron 1 of 10)	intron (NM_172923	intron 1 of 10)	35488	NM_172923	244886	Mm.24361	NM_172923	ENSMUSG00000032313	Tmem266	9630029F15|AI118078|HVRP1	transmembrane protein 266	protein-coding
72587	chr14	78470052	78470666	+	5.95	6.87	2.68	4.2	0.00276	0.00446	0.00446	NA	Intergenic	Intergenic	52343	NM_001346784	219181	Mm.89413	NM_001164503	ENSMUSG00000022016	Akap11	6330501D17Rik|AKAP220|Gm80|PRKA11|mKIAA0629	A kinase (PRKA) anchor protein 11	protein-coding
226	chr4	56830815	56832255	+	8.56	9.49	5.3	4.19	2.17e-55	1.12e-52	0	NA	intron (NM_018761	intron 8 of 18)	intron (NM_018761	intron 8 of 18)	-29204	NM_026079	230233	Mm.282743	NM_026079	ENSMUSG00000028431	Ikbkap	3110040G09Rik|6030413P05|C78473|Elp1|IKAP	inhibitor of kappa light polypeptide enhancer in B cells	kinase complex-associated protein	protein-coding
819	chr10	34070770	34071947	+	7.99	8.91	4.72	4.19	2.23e-39	3.2e-37	0	NA	intron (NM_001162937	intron 4 of 6)	intron (NM_001162937	intron 4 of 6)	25161	NM_178908	103511	Mm.66334	NM_178908	ENSMUSG00000049872	Fam26e	BB146404|Calhm5	family with sequence similarity 26	member E	protein-coding
1105	chr1	163670542	163672153	+	8.37	9.29	5.1	4.19	1.05e-35	1.12e-33	0	NA	Intergenic	URR1B|DNA|hAT-Charlie	53885	NM_001143956	240879	Mm.484621	NM_001143956	ENSMUSG00000040113	Mettl11b	Gm207|NTM1B	methyltransferase like 11B	protein-coding
1212	chr5	23626970	23627846	+	7.89	8.81	4.62	4.19	8.6e-35	8.32e-33	0	NA	intron (NM_001359174	intron 2 of 16)	intron (NM_001359174	intron 2 of 16)	-10837	NM_009274	20817	Mm.288728	NM_009274	ENSMUSG00000062604	Srpk2	AW226533|AW492537|AW547358|Wbp6|mSRPK2	serine/arginine-rich protein specific kinase 2	protein-coding
1839	chr16	23169874	23170617	+	7.71	8.63	4.44	4.19	2.5e-30	1.59e-28	0	NA	Intergenic	ORR1F|LTR|ERVL-MaLR	-5035	NR_155420	105246089	Mm.390905	NR_155420		C730014E05Rik	-	RIKEN cDNA C730014E05 gene	ncRNA
1840	chr3	9131812	9132587	+	7.68	8.61	4.42	4.19	2.52e-30	1.61e-28	0	NA	Intergenic	Intergenic	70235	NR_040597	75149	Mm.399324	NR_040597	ENSMUSG00000103116	4930539M17Rik	-	RIKEN cDNA 4930539M17 gene	ncRNA
2118	chr19	53408220	53409006	+	7.5	8.42	4.23	4.19	7.5e-29	4.15e-27	0	NA	Intergenic	L2a|LINE|L2	-17979	NM_172429	76479	Mm.313687	NM_172429	ENSMUSG00000025024	Smndc1	-	survival motor neuron domain containing 1	protein-coding
2575	chr18	8160894	8162220	+	7.34	8.26	4.07	4.19	6.95e-27	3.16e-25	0	NA	Intergenic	Intergenic	291844	NM_001360956	225131	Mm.204524	NM_153085	ENSMUSG00000024283	Wac	1110067P07Rik|A230035H12Rik|AI256735|AI256776|Wwp4	WW domain containing adaptor with coiled-coil	protein-coding
2604	chr4	83214784	83215455	+	7.37	8.3	4.11	4.19	8.74e-27	3.94e-25	0	NA	Intergenic	Intergenic	109070	NM_027238	69863	Mm.5540	NM_025782	ENSMUSG00000038172	Ttc39b	1810054D07Rik|9130422G05Rik|AI450603|AV103077|AW215585	tetratricopeptide repeat domain 39B	protein-coding
2622	chr7	144684427	144685624	+	7.78	8.7	4.51	4.19	1.05e-26	4.68e-25	0	NA	intron (NM_178642	intron 1 of 25)	intron (NM_178642	intron 1 of 25)	53567	NM_001242349	101772	Mm.26700	NM_178642	ENSMUSG00000031075	Ano1	Tmem16a	anoctamin 1	calcium activated chloride channel	protein-coding
2788	chr17	73194566	73195348	+	7.43	8.36	4.16	4.19	3.45e-26	1.45e-24	0	NA	intron (NM_001081071	intron 4 of 5)	intron (NM_001081071	intron 4 of 5)	86972	NM_001177968	225010	Mm.329194	NM_001081071	ENSMUSG00000054469	Lclat1	AI181996|Agpat8|Alcat1|Gm91|Lycat	lysocardiolipin acyltransferase 1	protein-coding
2888	chr4	136333061	136333702	+	7.3	8.22	4.03	4.19	7.5e-26	3.04e-24	0	NA	intron (NM_001355182	intron 8 of 10)	intron (NM_001355182	intron 8 of 10)	21783	NM_001355182	74326	Mm.31051	NM_028871	ENSMUSG00000066037	Hnrnpr	2610003J05Rik|2610528B01Rik|Hnrpr	heterogeneous nuclear ribonucleoprotein R	protein-coding
3875	chr12	76458895	76459639	+	7.25	8.17	3.98	4.19	4.25e-23	1.29e-21	0	NA	Intergenic	Intergenic	14770	NR_028520	100041694	Mm.259350	NR_028520	ENSMUSG00000073000	Gm10451	-	predicted gene 10451	ncRNA
5324	chr1	183865081	183866034	+	7	7.93	3.74	4.19	2.68e-20	5.91e-19	0	NA	Intergenic	Intergenic	116580	NR_151520	102637191	Mm.417076	NR_151520	ENSMUSG00000103305	Gm34068	-	predicted gene	34068	ncRNA
5864	chr13	93162355	93162859	+	6.73	7.65	3.47	4.19	1.54e-19	3.08e-18	0	NA	intron (NR_154997	intron 11 of 15)	ORR1D1-int|LTR|ERVL-MaLR	-17883	NM_023821	76469	Mm.33857	NM_023821	ENSMUSG00000047419	Cmya5	2310076E16Rik|2310076E21Rik|AA420382|AI504003|Srfsd|Tims|sr553	cardiomyopathy associated 5	protein-coding
7963	chr8	60864783	60865258	+	6.57	7.5	3.31	4.19	4.81e-17	7.09e-16	0	NA	Intergenic	MIRb|SINE|MIR	-25373	NM_028299	72612	Mm.25263	NM_028299	ENSMUSG00000038005	Hpf1	2700029M09Rik|C230006B22Rik|C4orf27	histone PARylation factor 1	protein-coding
8048	chr9	41815842	41816320	+	6.46	7.38	3.19	4.19	6.07e-17	8.85e-16	0	NA	Intergenic	ORR1E|LTR|ERVL-MaLR	234155	NR_029822	387236		NR_029822	ENSMUSG00000093354	Mir125b-1	Mirn125b|Mirn125b-1|mir-125b-1	microRNA 125b-1	ncRNA
8661	chr5	3722282	3722727	+	6.5	7.42	3.24	4.19	2.4e-16	3.25e-15	0	NA	intron (NM_001003909	intron 10 of 19)	intron (NM_001003909	intron 10 of 19)	50283	NM_001289529	70797	Mm.130148	NM_001003909	ENSMUSG00000040351	Ankib1	2310061P20Rik|4631416I11Rik|AW494740|C80642|mKIAA1386	ankyrin repeat and IBR domain containing 1	protein-coding
9965	chr18	57403968	57404789	+	6.47	7.39	3.2	4.19	3.09e-15	3.64e-14	0	NA	Intergenic	Intergenic	-1037	NR_152223	100503007	Mm.238087	NR_152223		Gm19500	-	predicted gene	19500	ncRNA
16672	chr16	23097351	23097864	+	5.73	6.65	2.46	4.19	1.59e-11	1.12e-10	0	NA	Intergenic	Intergenic	-9861	NM_013506	13682	Mm.260084	NM_013506	ENSMUSG00000022884	Eif4a2	4833432N07Rik|BM-010|Ddx2b|Eif4|eIF-4A-II|eIF4A-II	eukaryotic translation initiation factor 4A2	protein-coding
19232	chr2	125209120	125209554	+	5.5	6.42	2.24	4.19	1.42e-10	8.64e-10	0	NA	intron (NM_001079690	intron 21 of 27)	intron (NM_001079690	intron 21 of 27)	-37911	NM_001159646	110074	Mm.282499	NM_023595	ENSMUSG00000027203	Dut	5031412I06Rik|5133400F09Rik|D2Bwg0749e|Dutp|dUTPase	deoxyuridine triphosphatase	protein-coding
21704	chr6	94921759	94922088	+	5.38	6.31	2.11	4.19	8.22e-10	4.44e-09	0	NA	Intergenic	Intergenic	-21911	NR_040761	78773	Mm.67065	NR_040761	ENSMUSG00000108187	4930511E03Rik	-	RIKEN cDNA 4930511E03 gene	ncRNA
26807	chr5	139921743	139922052	+	5.11	6.03	1.84	4.19	1.55e-08	6.77e-08	0	NA	intron (NM_175522	intron 1 of 1)	L1ME1|LINE|L1	13954	NM_175522	243312	Mm.237102	NM_175522	ENSMUSG00000048988	Elfn1	A930017N06Rik|AI197272|Ppp1r28	leucine rich repeat and fibronectin type III	extracellular 1	protein-coding
27844	chr2	147707195	147707494	+	5.14	6.06	1.87	4.19	2.61e-08	1.1e-07	0	NA	Intergenic	Intergenic	-3349	NR_046014	381384	Mm.259809	NR_046014	ENSMUSG00000051986	A530006G24Rik	Gm1003	RIKEN cDNA A530006G24 gene	ncRNA
28492	chr11	52449064	52449363	+	5.07	5.99	1.8	4.19	3.57e-08	1.47e-07	0	NA	Intergenic	RMER13A2|LTR|ERVK	52785	NM_153117	213673	Mm.291979	NM_153117	ENSMUSG00000036275	9530068E07Rik	C85061|Kct2	RIKEN cDNA 9530068E07 gene	protein-coding
28951	chr10	25439256	25439493	+	5.12	6.05	1.85	4.19	4.46e-08	1.81e-07	0	NA	intron (NM_013511	intron 1 of 19)	intron (NM_013511	intron 1 of 19)	31006	NM_013511	13822	Mm.306026	NM_013511	ENSMUSG00000019978	Epb41l2	4.1G|AW555191|D10Ertd398e|Epb4.1l2|NBL2	erythrocyte membrane protein band 4.1 like 2	protein-coding
30663	chr6	137814074	137814312	+	4.92	5.84	1.65	4.19	9.64e-08	3.69e-07	0	NA	intron (NM_172733	intron 6 of 8)	intron (NM_172733	intron 6 of 8)	59616	NM_172733	232449	Mm.29181	NM_172733	ENSMUSG00000030225	Dera	2010002D22Rik|2500002K03Rik|DEOC	deoxyribose-phosphate aldolase (putative)	protein-coding
31534	chr14	118514700	118515028	+	4.78	5.7	1.51	4.19	1.39e-07	5.18e-07	0	NA	intron (NM_001163676	intron 25 of 29)	L1MB2|LINE|L1	77608	NR_105815	102465208		NR_105815	ENSMUSG00000098433	Mir6391	Gm27914|mmu-mir-6391	microRNA 6391	ncRNA
35070	chr17	44137906	44138194	+	4.71	5.64	1.45	4.19	5.52e-07	1.85e-06	0	NA	Intergenic	Intergenic	-32241	NM_001357997	224794	Mm.255971	NM_199016	ENSMUSG00000023961	Enpp4	4933413N07Rik|AA986363|AI195364|E-NPP 4|Gm90	ectonucleotide pyrophosphatase/phosphodiesterase 4	protein-coding
36242	chr12	85252118	85252392	+	4.71	5.63	1.45	4.19	8.46e-07	2.74e-06	0	NA	intron (NM_175337	intron 5 of 11)	MTE2a|LTR|ERVL-MaLR	-6270	NR_105903	102466769		NR_105903	ENSMUSG00000098263	Mir6938	Gm27519|mmu-mir-6938	microRNA 6938	ncRNA
36978	chr2	137409683	137409970	+	4.57	5.49	1.3	4.19	1.09e-06	3.44e-06	0	NA	Intergenic	Intergenic	-293306	NM_013822	16449	Mm.22398	NM_013822	ENSMUSG00000027276	Jag1	ABE2|Gsfabe2|Htu|Ozz|Ser-1	jagged 1	protein-coding
37275	chr13	56237969	56238172	+	4.57	5.49	1.3	4.19	1.19e-06	3.75e-06	0	NA	intron (NR_131023	intron 3 of 4)	intron (NR_131023	intron 3 of 4)	5870	NR_131023	75245	Mm.159475	NR_131023	ENSMUSG00000097361	4930550C17Rik	-	RIKEN cDNA 4930550C17 gene	ncRNA
59751	chr5	146883586	146884525	+	7.03	7.96	3.76	4.19	0.000291	0.000571	0.000571	NA	Intergenic	Intergenic	38984	NM_026864	68895	Mm.266978	NM_026864	ENSMUSG00000029641	Rasl11a	1110065D03Rik|AI852031	RAS-like	family 11	member A	protein-coding
60913	chr1	153565681	153566136	+	6.07	6.99	2.8	4.19	0.000363	0.000699	0.000699	NA	Intergenic	Intergenic	-16194	NM_028749	74091	Mm.24887	NM_028749	ENSMUSG00000042684	Npl	0610033B02Rik	N-acetylneuraminate pyruvate lyase	protein-coding
1434	chr12	81160003	81161190	+	7.76	8.68	4.5	4.18	6.57e-33	5.37e-31	0	NA	intron (NM_001146217	intron 7 of 12)	intron (NM_001146217	intron 7 of 12)	-5555	NR_037227	100526532		NR_037227	ENSMUSG00000092673	Mir3067	mir-3067|mmu-mir-3067	microRNA 3067	ncRNA
1822	chr2	125303752	125304525	+	7.7	8.62	4.44	4.18	2.25e-30	1.45e-28	0	NA	intron (NM_007993	intron 64 of 65)	intron (NM_007993	intron 64 of 65)	56623	NM_023595	110074	Mm.282499	NM_023595	ENSMUSG00000027203	Dut	5031412I06Rik|5133400F09Rik|D2Bwg0749e|Dutp|dUTPase	deoxyuridine triphosphatase	protein-coding
2035	chr16	32676709	32677655	+	7.75	8.68	4.49	4.18	3.33e-29	1.92e-27	0	NA	intron (NM_001289443	intron 2 of 5)	intron (NM_001289443	intron 2 of 5)	4028	NM_001289443	51789	Mm.251115	NM_016788	ENSMUSG00000022791	Tnk2	Ack|Ack-1|Ack1|Cdgip|Pyk1	tyrosine kinase	non-receptor	2	protein-coding
2120	chr18	33666869	33668003	+	8.13	9.05	4.87	4.18	7.62e-29	4.21e-27	0	NA	Intergenic	Intergenic	-127456	NR_038151	69749	Mm.248787	NR_038151	ENSMUSG00000087590	Epb41l4aos	2410004N09Rik|Epb4.1l4aos	erythrocyte membrane protein band 4.1 like 4a	opposite strand	ncRNA
2367	chr17	83138570	83139402	+	7.69	8.62	4.44	4.18	9.68e-28	4.79e-26	0	NA	Intergenic	Intergenic	-60761	NR_045094	100503434	Mm.187281	NR_045094		Gm19689	-	predicted gene	19689	ncRNA
3167	chr3	54479923	54480814	+	7.45	8.38	4.19	4.18	5.75e-25	2.13e-23	0	NA	Intergenic	Intergenic	119261	NM_001198766	50706	Mm.236067	NM_015784	ENSMUSG00000027750	Postn	A630052E07Rik|AI747096|OSF-2|Osf2|PLF|PN	periostin	osteoblast specific factor	protein-coding
3493	chr2	5645502	5646088	+	7.28	8.2	4.03	4.18	4.77e-24	1.6e-22	0	NA	intron (NM_001290374	intron 1 of 9)	intron (NM_001290374	intron 1 of 9)	30251	NM_001290376	227541	Mm.191949	NM_177343	ENSMUSG00000039145	Camk1d	A630059D12Rik|CKLiK|CaMKIdelta|E030025C11Rik|mCKLiK	calcium/calmodulin-dependent protein kinase ID	protein-coding
4016	chr2	5165690	5166434	+	7.69	8.61	4.43	4.18	8.98e-23	2.62e-21	0	NA	intron (NM_028804	intron 2 of 2)	intron (NM_028804	intron 2 of 2)	28286	NM_028804	74186	Mm.274715	NM_028804	ENSMUSG00000026676	Ccdc3	2310045O21Rik	coiled-coil domain containing 3	protein-coding
4386	chr2	80046692	80047474	+	7.12	8.04	3.86	4.18	5.64e-22	1.51e-20	0	NA	intron (NM_001355141	intron 2 of 15)	intron (NM_001355141	intron 2 of 15)	-8181	NM_001355142	18573	Mm.40678	NM_016744	ENSMUSG00000059173	Pde1a	AI987702|AW125737	phosphodiesterase 1A	calmodulin-dependent	protein-coding
4671	chr6	35388637	35389343	+	6.98	7.9	3.72	4.18	2.01e-21	5.06e-20	0	NA	Intergenic	Intergenic	58144	NR_040526	73409	Mm.69443	NR_040526	ENSMUSG00000107341	1700065J11Rik	-	RIKEN cDNA 1700065J11 gene	ncRNA
5515	chr16	37732434	37732947	+	6.78	7.71	3.53	4.18	4.96e-20	1.05e-18	0	NA	Intergenic	Intergenic	-44365	NM_008047	14314	Mm.182434	NM_008047	ENSMUSG00000022816	Fstl1	AI316791|AW107808|Fstl|TSC-36	follistatin-like 1	protein-coding
5681	chr16	17732916	17733493	+	6.69	7.62	3.43	4.18	8.56e-20	1.77e-18	0	NA	Intergenic	RMER5|LTR|ERV1	-10257	NM_001040683	94112	Mm.208970	NM_033609	ENSMUSG00000012114	Med15	A230074L19Rik|AW536074|Pcqap|mPcqap	mediator complex subunit 15	protein-coding
5730	chr18	78072088	78072811	+	6.77	7.7	3.52	4.18	1e-19	2.05e-18	0	NA	Intergenic	Intergenic	-15181	NM_001101038	620235	Mm.35607	NM_001101038	ENSMUSG00000091055	Siglec15	Cd33l3|EG620235|SIGLEC-I	sialic acid binding Ig-like lectin 15	protein-coding
6261	chr10	107967017	107967543	+	6.75	7.68	3.5	4.18	5.1e-19	9.55e-18	0	NA	intron (NR_131147	intron 3 of 5)	intron (NR_131147	intron 3 of 5)	20635	NR_131147	628877	Mm.363120	NR_131147	ENSMUSG00000112910	Gm29685	-	predicted gene	29685	ncRNA
6337	chr5	4323207	4323800	+	7.07	7.99	3.82	4.18	6.39e-19	1.18e-17	0	NA	Intergenic	Intergenic	131136	NM_001042670	208595	Mm.129815	NM_001042670	ENSMUSG00000053178	Mterf1b	Gm9897	mitochondrial transcription termination factor 1b	protein-coding
7812	chr14	105664798	105665305	+	6.51	7.43	3.25	4.18	3.35e-17	5.03e-16	0	NA	Intergenic	Intergenic	-41281	NR_105814	102465207		NR_105814	ENSMUSG00000098780	Mir6390	Gm27562|mmu-mir-6390	microRNA 6390	ncRNA
10586	chr6	113522110	113522682	+	6.43	7.35	3.17	4.18	8.31e-15	9.2e-14	0	NA	exon (NM_175101	exon 3 of 8)	exon (NM_175101	exon 3 of 8)	9242	NM_175101	66087	Mm.275989	NM_175101	ENSMUSG00000030286	Emc3	0610039A15Rik|AI225901|AW260416|Pob|Tmem111	ER membrane protein complex subunit 3	protein-coding
11928	chr16	33467456	33467867	+	6.01	6.93	2.75	4.18	6.32e-14	6.21e-13	0	NA	intron (NM_001358570	intron 6 of 8)	intron (NM_001358570	intron 6 of 8)	-50668	NM_134251	171286	Mm.35253	NM_134251	ENSMUSG00000035506	Slc12a8	CCC9|E330020C02Rik	solute carrier family 12 (potassium/chloride transporters)	member 8	protein-coding
12205	chr11	94253593	94254141	+	6.42	7.34	3.16	4.18	9.98e-14	9.59e-13	0	NA	Intergenic	Intergenic	-11288	NM_181819	278507	Mm.342216	NM_181819	ENSMUSG00000044177	Wfikkn2	2610304F08Rik|AY100450|Gasp1|WFIKKNRP	WAP	follistatin/kazal	immunoglobulin	kunitz and netrin domain containing 2	protein-coding
12300	chr7	101245703	101246265	+	6.04	6.96	2.78	4.18	1.12e-13	1.07e-12	0	NA	intron (NM_001146010	intron 10 of 19)	B1F|SINE|Alu	56104	NM_001111111	73683	Mm.275744	NM_001111111	ENSMUSG00000047767	Atg16l2	2410118P20Rik	autophagy related 16-like 2 (S. cerevisiae)	protein-coding
15434	chr6	118122585	118123249	+	5.99	6.91	2.73	4.18	4.8e-12	3.64e-11	0	NA	intron (NM_001362149	intron 4 of 7)	intron (NM_001362149	intron 4 of 7)	15913	NM_001362149	78752	Mm.300317	NM_030165	ENSMUSG00000042042	Csgalnact2	4632415D10Rik|Galnact2	chondroitin sulfate N-acetylgalactosaminyltransferase 2	protein-coding
16227	chr13	47093841	47094185	+	5.64	6.57	2.38	4.18	1.06e-11	7.66e-11	0	NA	intron (NM_025900	intron 7 of 10)	B1_Mus1|SINE|Alu	12208	NM_025900	110052	Mm.131150	NM_025900	ENSMUSG00000021377	Dek	1810019E15Rik|D13H6S231E	DEK oncogene (DNA binding)	protein-coding
16643	chr12	70363488	70363951	+	5.76	6.69	2.51	4.18	1.56e-11	1.1e-10	0	NA	intron (NR_037248	intron 2 of 4)	intron (NR_037248	intron 2 of 4)	-16105	NM_001110203	94090	Mm.184012	NM_053167	ENSMUSG00000021071	Trim9	-	tripartite motif-containing 9	protein-coding
19656	chr7	110385383	110385803	+	5.79	6.71	2.53	4.18	1.97e-10	1.17e-09	0	NA	intron (NM_177324	intron 17 of 40)	intron (NM_177324	intron 17 of 40)	163890	NM_009302	20947	Mm.334144	NM_009302	ENSMUSG00000031015	Swap70	70kDa|AV235546	SWA-70 protein	protein-coding
21695	chr18	42588526	42588862	+	5.26	6.18	2	4.18	8.17e-10	4.42e-09	0	NA	Intergenic	MTC|LTR|ERVL-MaLR	-9042	NM_181543	240239	Mm.186779	NM_181543	ENSMUSG00000042816	Gpr151	C130082O03Rik|GalRL|PGR7|nGPCR-2037	G protein-coupled receptor 151	protein-coding
23186	chr14	23051444	23051789	+	5.6	6.52	2.34	4.18	2.1e-09	1.06e-08	0	NA	intron (NR_033550	intron 2 of 3)	intron (NR_033550	intron 2 of 3)	42955	NR_033550	791307	Mm.364384	NR_033550	ENSMUSG00000068680	Gm10248	-	predicted gene 10248	ncRNA
23699	chr10	16624895	16625299	+	5.43	6.35	2.17	4.18	2.87e-09	1.42e-08	0	NA	Intergenic	Intergenic	470685	NR_038020	100504235	Mm.84044	NR_038020	ENSMUSG00000101969	Gm20125	-	predicted gene	20125	ncRNA
26987	chr8	8040889	8041334	+	5.15	6.07	1.89	4.18	1.71e-08	7.43e-08	0	NA	Intergenic	Intergenic	619662	NM_010111	13642	Mm.209813	NM_010111	ENSMUSG00000001300	Efnb2	ELF-2|Epl5|Eplg5|Htk-L|LERK-5|Lerk5|NLERK-1	ephrin B2	protein-coding
31684	chr16	26164156	26164482	+	4.75	5.68	1.49	4.18	1.47e-07	5.45e-07	0	NA	Intergenic	Intergenic	-58535	NM_173379	210530	Mm.326869	NM_173379	ENSMUSG00000038168	P3h2	4832416N06|AW553532|Leprel1|Mlat4	prolyl 3-hydroxylase 2	protein-coding
33799	chr1	46869784	46870203	+	4.75	5.67	1.49	4.18	3.44e-07	1.19e-06	0	NA	intron (NM_001356417	intron 2 of 10)	Charlie1a|DNA|hAT-Charlie	-16375	NM_172653	227059	Mm.233889	NM_172653	ENSMUSG00000025986	Slc39a10	2900042E17Rik|5430433I10|Zip10|mKIAA1265	solute carrier family 39 (zinc transporter)	member 10	protein-coding
37059	chr7	35792254	35792512	+	4.56	5.48	1.3	4.18	1.11e-06	3.51e-06	0	NA	intron (NM_177739	intron 3 of 6)	intron (NM_177739	intron 3 of 6)	-10209	NR_033567	78547	Mm.406883	NR_033567	ENSMUSG00000044997	E130304I02Rik	-	RIKEN cDNA E130304I02 gene	ncRNA
44280	chr9	46114599	46114796	+	4.29	5.21	1.03	4.18	9.64e-06	2.55e-05	0	NA	intron (NM_027498	intron 1 of 24)	intron (NM_027498	intron 1 of 24)	101877	NM_027498	70661	Mm.219459	NM_027498	ENSMUSG00000034135	Sik3	5730525O22Rik|9030204A07Rik|AI447252|AI846254|AI849445|Qsk|SIK-3|mKIAA0999	SIK family kinase 3	protein-coding
64562	chr9	99701232	99701746	+	6.34	7.27	3.09	4.18	0.000699	0.00127	0.00127	NA	intron (NM_001194921	intron 1 of 4)	intron (NM_001194921	intron 1 of 4)	8574	NM_001194922	56492	Mm.386784	NM_019815	ENSMUSG00000032473	Cldn18	-	claudin 18	protein-coding
553	chr4	105936627	105937961	+	8.46	9.38	5.21	4.17	8.56e-44	1.82e-41	0	NA	Intergenic	Intergenic	-303919	NR_151521	105244641	Mm.404914	NR_151521		Gm12724	-	predicted gene 12724	ncRNA
1252	chr17	88195019	88195940	+	7.91	8.83	4.66	4.17	2.02e-34	1.89e-32	0	NA	Intergenic	ERVL-B4-int|LTR|ERVL	69967	NM_001190356	225058	Mm.312053	NM_001190356		Gm4832	EG225058	predicted gene 4832	protein-coding
1272	chr2	125540386	125541155	+	7.85	8.77	4.6	4.17	2.91e-34	2.68e-32	0	NA	Intergenic	Intergenic	-34332	NM_007993	14118	Mm.271644	NM_007993	ENSMUSG00000027204	Fbn1	AI536462|B430209H23|Fib-1|Tsk	fibrillin 1	protein-coding
1704	chr11	45805195	45805844	+	8.03	8.95	4.78	4.17	4.18e-31	2.88e-29	0	NA	Intergenic	MLTR14|LTR|ERV1	-2564	NR_045876	100009664	Mm.415439	NR_045876		F630206G17Rik	-	RIKEN cDNA F630206G17 gene	ncRNA
2967	chr9	51727612	51728624	+	7.86	8.78	4.61	4.17	1.22e-25	4.83e-24	0	NA	Intergenic	Intergenic	-37234	NM_175535	244867	Mm.400352	NM_175535	ENSMUSG00000053199	Arhgap20	6530403F17Rik|A530023E23Rik|RARhoGAP|mKIAA1391	Rho GTPase activating protein 20	protein-coding
3333	chr16	45968683	45969379	+	7.67	8.59	4.42	4.17	1.56e-24	5.47e-23	0	NA	non-coding (NR_152226	exon 3 of 3)	non-coding (NR_152226	exon 3 of 3)	23425	NR_152226	100503378	Mm.387133	NR_152226	ENSMUSG00000085826	Gm15638	Gm41457	predicted gene 15638	ncRNA
3356	chr4	64078022	64078578	+	7.34	8.26	4.1	4.17	1.76e-24	6.16e-23	0	NA	Intergenic	Intergenic	-31285	NM_011607	21923	Mm.980	NM_011607	ENSMUSG00000028364	Tnc	AI528729|C130033P17Rik|Hxb|TN|TN-C|Ten|cytotactin|tenascin-C	tenascin C	protein-coding
3474	chr17	44500190	44500881	+	7.6	8.52	4.35	4.17	4.15e-24	1.4e-22	0	NA	intron (NR_073425	intron 5 of 5)	intron (NR_073425	intron 5 of 5)	235641	NR_073425	12393	Mm.391013	NM_009820	ENSMUSG00000039153	Runx2	AML3|Cbf|Cbfa-1|Cbfa1|LS3|Osf2|PEBP2aA|Pebp2a1|Pebpa2a	runt related transcription factor 2	protein-coding
3777	chr10	83093789	83094608	+	7.19	8.11	3.95	4.17	2.27e-23	7.03e-22	0	NA	intron (NM_021439	intron 2 of 2)	intron (NM_021439	intron 2 of 2)	108701	NM_021439	58250	Mm.360747	NM_021439	ENSMUSG00000034612	Chst11	1110020P09Rik|C4ST|C4ST-1|C4ST1|C4s	carbohydrate sulfotransferase 11	protein-coding
4786	chr3	95117764	95118392	+	6.91	7.83	3.66	4.17	3.02e-21	7.4e-20	0	NA	intron (NM_009336	intron 1 of 5)	intron (NM_009336	intron 1 of 5)	-6436	NM_016712	50874	Mm.71935	NM_016712	ENSMUSG00000005628	Tmod4	MTMOD|Sk-Tmod	tropomodulin 4	protein-coding
4923	chr4	56393640	56394549	+	7.06	7.98	3.81	4.17	5.58e-21	1.33e-19	0	NA	Intergenic	Intergenic	347331	NM_025271	11471	Mm.251434	NM_025271	ENSMUSG00000070980	Actl7b	Gm26657|Tact1	actin-like 7b	protein-coding
5028	chr2	24453166	24453696	+	7.2	8.12	3.95	4.17	8.44e-21	1.97e-19	0	NA	intron (NM_011040	intron 2 of 11)	intron (NM_011040	intron 2 of 11)	22168	NM_011040	18510	Mm.2533	NM_011040	ENSMUSG00000026976	Pax8	Pax-8	paired box 8	protein-coding
5218	chr1	72070499	72070948	+	6.86	7.78	3.62	4.17	1.82e-20	4.1e-19	0	NA	Intergenic	Intergenic	-65528	NR_040454	71134	Mm.370574	NR_040454	ENSMUSG00000101848	4933417E11Rik	-	RIKEN cDNA 4933417E11 gene	ncRNA
5519	chr6	58847698	58848294	+	7.07	7.99	3.82	4.17	5.04e-20	1.07e-18	0	NA	intron (NM_001361966	intron 3 of 25)	intron (NM_001361966	intron 3 of 25)	14296	NM_028705	73998	Mm.191892	NM_028705	ENSMUSG00000029804	Herc3	5730409F18Rik|AI646603|mKIAA0032	hect domain and RLD 3	protein-coding
8886	chr10	9865524	9866020	+	6.44	7.36	3.18	4.17	3.78e-16	4.99e-15	0	NA	intron (NM_001081344	intron 3 of 25)	intron (NM_001081344	intron 3 of 25)	35268	NM_001081344	78808	Mm.331751	NM_030191	ENSMUSG00000019790	Stxbp5	0710001E20Rik|4930565N16Rik|AW742610|LGL3|mKIAA1006	syntaxin binding protein 5 (tomosyn)	protein-coding
13023	chr9	88273252	88273661	+	6.6	7.52	3.35	4.17	2.99e-13	2.7e-12	0	NA	Intergenic	Intergenic	-54153	NM_011851	23959	Mm.244235	NM_011851	ENSMUSG00000032420	Nt5e	2210401F01Rik|5'-NT|AI447961|CD73|NT|Nt5|eNT	5' nucleotidase	ecto	protein-coding
14794	chrX	162303651	162304418	+	5.92	6.84	2.67	4.17	2.35e-12	1.86e-11	0	NA	Intergenic	L2|LINE|L2	-144593	NM_001081052	195727	Mm.336313	NM_001081052	ENSMUSG00000059493	Nhs	Gm389|Gm48|Nhs1|Xcat	NHS actin remodeling regulator	protein-coding
28056	chr6	5448447	5448762	+	5.28	6.2	2.03	4.17	2.88e-08	1.2e-07	0	NA	Intergenic	Intergenic	47674	NM_013743	27273	Mm.235547	NM_013743	ENSMUSG00000019577	Pdk4	AV005916	pyruvate dehydrogenase kinase	isoenzyme 4	protein-coding
28638	chrX	136248715	136249128	+	5.05	5.97	1.8	4.17	3.82e-08	1.56e-07	0	NA	Intergenic	LTR40c|LTR|ERVL	3841	NM_011712	22381	Mm.512	NM_011712	ENSMUSG00000042712	Tceal9	AL024233|Wbp5	transcription elongation factor A like 9	protein-coding
39965	chr9	96767694	96767949	+	4.71	5.63	1.46	4.17	2.83e-06	8.3e-06	0	NA	intron (NR_102294	intron 1 of 2)	ORR1D1|LTR|ERVL-MaLR	2259	NR_102295	319707	Mm.392191	NR_102293	ENSMUSG00000101581	C430002N11Rik	-	RIKEN cDNA C430002N11 gene	ncRNA
41918	chr4	120081715	120082782	+	7.83	8.75	4.58	4.17	4.98e-06	1.39e-05	0	NA	intron (NM_010657	intron 3 of 8)	intron (NM_010657	intron 3 of 8)	-78958	NM_007902	13615	Mm.284855	NM_007902	ENSMUSG00000028635	Edn2	ET-2|PPET2|VIC	endothelin 2	protein-coding
43150	chr13	29119492	29119698	+	4.26	5.18	1.01	4.17	6.98e-06	1.9e-05	0	NA	Intergenic	RMER6A|LTR|ERVK	103340	NR_045075	77920	Mm.197051	NR_045073	ENSMUSG00000086363	A330102I10Rik	-	RIKEN cDNA A330102I10 gene	ncRNA
56696	chr8	23038022	23039287	+	7.99	8.92	4.74	4.17	0.000163	0.000337	0.000337	NA	intron (NM_001277284	intron 1 of 42)	intron (NM_001277284	intron 1 of 42)	3555	NM_001277284	11733	Mm.334444	NM_031158	ENSMUSG00000031543	Ank1	Ank-1|nb|pale	ankyrin 1	erythroid	protein-coding
66724	chr14	57083905	57084696	+	6.92	7.84	3.68	4.17	0.00104	0.00183	0.00183	NA	Intergenic	Intergenic	20402	NM_008125	14619	Mm.390683	NM_008125	ENSMUSG00000046352	Gjb2	AI325222|Cnx26|Cx26|Gjb-2	gap junction protein	beta 2	protein-coding
67901	chrX	56748806	56749260	+	5.56	6.48	2.31	4.17	0.00128	0.0022	0.0022	NA	intron (NM_001077361	intron 1 of 7)	intron (NM_001077361	intron 1 of 7)	17076	NM_001077361	14199	Mm.3126	NM_010211	ENSMUSG00000023092	Fhl1	FHL-1|KyoT|RAM14-1|SLIM|SLIM-1	four and a half LIM domains 1	protein-coding
64	chr3	104993566	104994946	+	9.19	10.12	5.96	4.16	6.52e-73	1.18e-69	0	NA	Intergenic	Intergenic	-32547	NM_009520	22414	Mm.10740	NM_009520	ENSMUSG00000027840	Wnt2b	Wnt13	wingless-type MMTV integration site family	member 2B	protein-coding
68	chr5	137079668	137080548	+	9.26	10.18	6.02	4.16	1.06e-72	1.82e-69	0	NA	Intergenic	Intergenic	-7836	NM_008871	18787	Mm.250422	NM_008871	ENSMUSG00000037411	Serpine1	PAI-1|PAI1|Planh1	serine (or cysteine) peptidase inhibitor	clade E	member 1	protein-coding
327	chr14	66223503	66224503	+	8.65	9.58	5.42	4.16	2.34e-50	8.38e-48	0	NA	intron (NM_001162366	intron 1 of 30)	intron (NM_001162366	intron 1 of 30)	-10179	NM_001360233	19229	Mm.21613	NM_172498	ENSMUSG00000059456	Ptk2b	CADTK|CAKB|CAKbeta|E430023O05Rik|FADK2|FAK2|PYK2|Raftk	PTK2 protein tyrosine kinase 2 beta	protein-coding
536	chr6	91192309	91193459	+	8.26	9.18	5.02	4.16	3.33e-44	7.29e-42	0	NA	Intergenic	Intergenic	-19880	NM_007992	14115	Mm.249146	NM_007992	ENSMUSG00000064080	Fbln2	5730577E14Rik|FIBL-2	fibulin 2	protein-coding
724	chr11	101220902	101221931	+	8.07	8.99	4.83	4.16	1.54e-40	2.49e-38	0	NA	intron (NM_007970	intron 1 of 20)	intron (NM_007970	intron 1 of 20)	5047	NM_007970	14055	Mm.5027	NM_007970	ENSMUSG00000006920	Ezh1	ENX-2	enhancer of zeste 1 polycomb repressive complex 2 subunit	protein-coding
851	chr10	89526913	89527651	+	8.4	9.32	5.16	4.16	4.99e-39	6.87e-37	0	NA	intron (NM_001163504	intron 1 of 9)	intron (NM_001163504	intron 1 of 9)	6340	NM_001163504	20186	Mm.3095	NM_009108	ENSMUSG00000047638	Nr1h4	AI957360|Fxr|HRR1|RIP14|Rxrip14	nuclear receptor subfamily 1	group H	member 4	protein-coding
941	chrX	74273237	74274599	+	8.05	8.97	4.81	4.16	5.51e-38	6.86e-36	0	NA	TTS (NM_052835)	TTS (NM_052835)	187	NR_106059	102466804		NR_106059	ENSMUSG00000099226	Mir7091	Gm27381|mmu-mir-7091	microRNA 7091	ncRNA
1099	chr9	43982276	43983075	+	8.32	9.24	5.08	4.16	9.29e-36	9.91e-34	0	NA	Intergenic	RMER1A|Other|Other	-60709	NM_009382	21838	Mm.3951	NM_009382	ENSMUSG00000032011	Thy1	CD90|T25|Thy-1|Thy-1.2|Thy1.1|Thy1.2	thymus cell antigen 1	theta	protein-coding
1196	chr13	15806624	15807431	+	8.01	8.93	4.77	4.16	6.75e-35	6.62e-33	0	NA	promoter-TSS (NR_046131)	promoter-TSS (NR_046131)	-216	NR_046131	328190	Mm.446957	NR_046131	ENSMUSG00000113338	A530046M15Rik	A530046M15	RIKEN cDNA A530046M15 gene	ncRNA
1343	chr3	51092076	51093068	+	8.08	9	4.85	4.16	1.15e-33	1e-31	0	NA	Intergenic	Intergenic	-131875	NM_009834	12457	Mm.86541	NM_009834	ENSMUSG00000023087	Noct	AU043840|Ccr4|Ccrn4l	nocturnin	protein-coding
1556	chr19	7498539	7499518	+	7.76	8.68	4.52	4.16	5.59e-32	4.21e-30	0	NA	intron (NM_146091	intron 1 of 12)	intron (NM_146091	intron 1 of 12)	4590	NM_146091	109168	Mm.264016	NM_146091	ENSMUSG00000024759	Atl3	4633402C03Rik|5730596K20Rik|AI465397|AW228836	atlastin GTPase 3	protein-coding
1603	chr4	134985846	134986607	+	7.96	8.88	4.73	4.16	9.67e-32	7.07e-30	0	NA	Intergenic	Intergenic	55246	NM_026780	68592	Mm.29989	NM_026780	ENSMUSG00000028821	Syf2	1110018L13Rik|Cbpin|D4Bwg1551e|Gcipip|Ntc31|mp29|p29	SYF2 homolog	RNA splicing factor (S. cerevisiae)	protein-coding
1773	chr8	14033998	14034920	+	7.85	8.77	4.61	4.16	1.21e-30	8.01e-29	0	NA	intron (NM_001034862	intron 3 of 5)	intron (NM_001034862	intron 3 of 5)	35519	NR_131136	546036	Mm.31785	NR_131136	ENSMUSG00000110058	Gm5907	EG546036|Gm45519|Gm845	predicted gene 5907	ncRNA
2091	chr7	125539235	125540073	+	8.01	8.93	4.77	4.16	5.77e-29	3.23e-27	0	NA	Intergenic	ORR1F|LTR|ERVL-MaLR	-12628	NM_001008700	16190	Mm.233802	NM_010557	ENSMUSG00000030748	Il4ra	CD124|Il4r	interleukin 4 receptor	alpha	protein-coding
3078	chr16	19969502	19969925	+	7.36	8.28	4.12	4.16	3.4e-25	1.3e-23	0	NA	intron (NM_183390	intron 1 of 6)	intron (NM_183390	intron 1 of 6)	13336	NM_183390	239743	Mm.86699	NM_183390	ENSMUSG00000043008	Klhl6	-	kelch-like 6	protein-coding
3547	chr8	32334429	32335644	+	7.52	8.45	4.29	4.16	6.21e-24	2.05e-22	0	NA	Intergenic	Intergenic	183141	NR_046039	666589	Mm.367675	NR_046039		Gm8179	EG666589	predicted gene 8179	ncRNA
4714	chr6	52066889	52067683	+	6.95	7.87	3.71	4.16	2.32e-21	5.78e-20	0	NA	Intergenic	Intergenic	-35663	NR_110440	102635415	Mm.333063	NR_110440	ENSMUSG00000085412	Halr1	Gm15055|Haunt|Linchoxa1|linc-Evx1|linc-Hoxa1|linc1547	Hoxa adjacent long noncoding RNA 1	ncRNA
5426	chr18	57167334	57168292	+	7.52	8.44	4.28	4.16	3.88e-20	8.37e-19	0	NA	intron (NM_001001979	intron 1 of 24)	intron (NM_001001979	intron 1 of 24)	34723	NM_001001979	70417	Mm.297863	NM_001001979	ENSMUSG00000024593	Megf10	3000002B06Rik|Gm331	multiple EGF-like-domains 10	protein-coding
5716	chr10	83320815	83321368	+	6.72	7.64	3.48	4.16	9.49e-20	1.95e-18	0	NA	intron (NM_177388	intron 1 of 10)	intron (NM_177388	intron 1 of 10)	16726	NM_177388	338365	Mm.67073	NM_177388	ENSMUSG00000034591	Slc41a2	A230035L05Rik|SLC41A1-L1	solute carrier family 41	member 2	protein-coding
8124	chr4	16214133	16214848	+	6.61	7.53	3.37	4.16	7.16e-17	1.03e-15	0	NA	intron (NR_045765	intron 3 of 6)	MTE2b|LTR|ERVL-MaLR	50380	NR_045765	100415915	Mm.387180	NR_045765	ENSMUSG00000085112	A530072M11Rik	-	RIKEN cDNA gene A530072M11	ncRNA
8686	chr3	137933893	137934461	+	6.36	7.29	3.12	4.16	2.52e-16	3.4e-15	0	NA	intron (NM_011932	intron 8 of 8)	RMER6A|LTR|ERVK	15622	NM_019920	56692	Mm.331392	NM_019920	ENSMUSG00000091512	Lamtor3	AW556229|Map2k1ip1|Mapbp|Mapksp1|Mp1	late endosomal/lysosomal adaptor	MAPK and MTOR activator 3	protein-coding
10857	chr3	25856026	25856492	+	6.25	7.17	3.01	4.16	1.27e-14	1.38e-13	0	NA	intron (NM_001357095	intron 4 of 6)	intron (NM_001357095	intron 4 of 6)	297727	NM_001163387	192167	Mm.316080	NM_138666	ENSMUSG00000063887	Nlgn1	6330415N05Rik|BB179718|NL1|Nlg1|mKIAA1070	neuroligin 1	protein-coding
11447	chr6	144116675	144117131	+	6.21	7.13	2.97	4.16	3.06e-14	3.14e-13	0	NA	intron (NM_001243163	intron 2 of 13)	intron (NM_001243163	intron 2 of 13)	92665	NM_011444	20678	Mm.1752	NM_011444	ENSMUSG00000041540	Sox5	A730017D01Rik|AI528773	SRY (sex determining region Y)-box 5	protein-coding
11458	chr1	10955219	10955649	+	6.07	7	2.84	4.16	3.13e-14	3.2e-13	0	NA	Intergenic	Intergenic	-38031	NM_029525	109294	Mm.123247	NM_029525	ENSMUSG00000048960	Prex2	6230420N16Rik|AI316880|AI553603|C030045D06Rik|D430013K02|Depdc2|P-Rex2	phosphatidylinositol-3	4	5-trisphosphate-dependent Rac exchange factor 2	protein-coding
11498	chr17	3336112	3336655	+	6.34	7.26	3.1	4.16	3.35e-14	3.41e-13	0	NA	intron (NM_001122998	intron 1 of 26)	intron (NM_001122998	intron 1 of 26)	9810	NM_001122998	24001	Mm.137134	NM_011878	ENSMUSG00000023800	Tiam2	3000002F19Rik|STEF|mKIAA2016	T cell lymphoma invasion and metastasis 2	protein-coding
11560	chr11	33664787	33665305	+	6.14	7.06	2.91	4.16	3.67e-14	3.72e-13	0	NA	intron (NM_001190885	intron 1 of 8)	intron (NM_001190885	intron 1 of 8)	-86089	NM_146017	216643	Mm.99989	NM_146017	ENSMUSG00000020159	Gabrp	-	gamma-aminobutyric acid (GABA) A receptor	pi	protein-coding
12809	chr14	27823788	27824365	+	5.99	6.91	2.76	4.16	2.28e-13	2.09e-12	0	NA	intron (NM_001347497	intron 4 of 19)	intron (NM_001347497	intron 4 of 19)	201669	NM_001347497	238988	Mm.318004	NM_177814	ENSMUSG00000040640	Erc2	6430531D06|CAST|CAST1/ERC2|D14Ertd171e|ELKS2alpha	ELKS/RAB6-interacting/CAST family member 2	protein-coding
14161	chr11	121647183	121647664	+	6.05	6.97	2.81	4.16	1.21e-12	1e-11	0	NA	intron (NM_178664	intron 4 of 12)	intron (NM_178664	intron 4 of 12)	25728	NM_178664	210004	Mm.386847	NM_178664	ENSMUSG00000046605	B3gntl1	6030413G23Rik	UDP-GlcNAc:betaGal beta-1	3-N-acetylglucosaminyltransferase-like 1	protein-coding
16691	chr1	138356343	138356772	+	5.61	6.53	2.37	4.16	1.62e-11	1.14e-10	0	NA	Intergenic	Intergenic	82819	NM_177397	338375	Mm.114424	NM_177397	ENSMUSG00000026394	Atp6v1g3	-	ATPase	H+ transporting	lysosomal V1 subunit G3	protein-coding
17880	chr12	118701928	118702205	+	5.5	6.43	2.26	4.16	4.68e-11	3.07e-10	0	NA	Intergenic	Intergenic	-144263	NM_177082	320145	Mm.51682	NM_177082	ENSMUSG00000048562	Sp8	D930049B17Rik|mBtd	trans-acting transcription factor 8	protein-coding
20287	chr12	45029555	45029971	+	5.97	6.89	2.74	4.16	3.1e-10	1.79e-09	0	NA	intron (NM_144552	intron 1 of 5)	intron (NM_144552	intron 1 of 5)	44720	NM_144552	217517	Mm.285400	NM_144552	ENSMUSG00000046314	Stxbp6	BC024598|C85317	syntaxin binding protein 6 (amisyn)	protein-coding
21824	chrX	140994428	140994966	+	5.35	6.27	2.11	4.16	8.93e-10	4.8e-09	0	NA	intron (NM_174875	intron 7 of 12)	intron (NM_174875	intron 7 of 12)	37790	NM_174875	666468	Mm.102230	NM_174875	ENSMUSG00000079418	Atg4a	AI627006|AV169859|Apg4a|Atg4al|Autl2	autophagy related 4A	cysteine peptidase	protein-coding
29901	chr12	16365525	16365841	+	5.1	6.02	1.87	4.16	6.84e-08	2.68e-07	0	NA	Intergenic	Lx2|LINE|L1	224087	NM_001130412	14245	Mm.153625	NM_015763	ENSMUSG00000020593	Lpin1	Lipin1|fld	lipin 1	protein-coding
37189	chr2	107005927	107006235	+	4.76	5.68	1.53	4.16	1.16e-06	3.65e-06	0	NA	Intergenic	ERVB4_3-LTR_MM|LTR|ERVK	-31684	NM_001025102	212772	Mm.381231	NM_173750	ENSMUSG00000027122	Arl14ep	2700007P21Rik|4930448O08Rik|ARF7EP	ADP-ribosylation factor-like 14 effector protein	protein-coding
55999	chr7	100302169	100302951	+	8.11	9.03	4.87	4.16	0.000143	0.000298	0.000298	NA	intron (NM_177161	intron 5 of 12)	intron (NM_177161	intron 5 of 12)	17040	NM_177161	320452	Mm.150294	NM_177161	ENSMUSG00000051048	P4ha3	D930031A02Rik	procollagen-proline	2-oxoglutarate 4-dioxygenase (proline 4-hydroxylase)	alpha polypeptide III	protein-coding
69363	chr1	135483835	135484363	+	6.96	7.88	3.72	4.16	0.00163	0.00276	0.00276	NA	intron (NM_173437	intron 3 of 28)	intron (NM_173437	intron 3 of 28)	-29416	NR_049188	100885827		NR_049188	ENSMUSG00000093515	Mir1231	Gm23720|mir-1231|mmu-mir-1231	microRNA 1231	ncRNA
84	chr1	58742182	58743562	+	9.05	9.97	5.81	4.15	4.15e-70	5.79e-67	0	NA	intron (NM_001355056	intron 7 of 8)	MIR|SINE|MIR	12320	NM_001293805	12633	Mm.336848	NM_009805	ENSMUSG00000026031	Cflar	2310024N18Rik|A430105C05Rik|CLARP|Cash|Casper|FLAME|FLAME-1|Flip|Gm9845|I-FLICE|MRIT|c-Flip	CASP8 and FADD-like apoptosis regulator	protein-coding
117	chr17	70719526	70721242	+	8.87	9.79	5.64	4.15	1.83e-64	1.83e-61	0	NA	intron (NM_001347411	intron 9 of 14)	(CA)n|Simple_repeat|Simple_repeat	126393	NM_001164077	21815	Mm.101034	NM_009372	ENSMUSG00000047407	Tgif1	AA959811|AI462167|Tgif	TGFB-induced factor homeobox 1	protein-coding
145	chr8	24974032	24976305	+	9.14	10.06	5.91	4.15	1.38e-61	1.11e-58	0	NA	intron (NM_001270996	intron 14 of 21)	intron (NM_001270996	intron 14 of 21)	-26364	NM_153397	353188	Mm.269223	NM_153397	ENSMUSG00000037437	Adam32	-	a disintegrin and metallopeptidase domain 32	protein-coding
257	chr18	53249902	53250866	+	8.55	9.47	5.32	4.15	9.91e-54	4.52e-51	0	NA	intron (NM_029394	intron 1 of 6)	MLT1A0|LTR|ERVL-MaLR	4722	NM_029394	69226	Mm.32414	NM_029394	ENSMUSG00000024535	Snx24	2810011K15Rik|5730433I16Rik|AI451341	sorting nexing 24	protein-coding
844	chr1	127849940	127850793	+	8.06	8.98	4.83	4.15	4.03e-39	5.59e-37	0	NA	Intergenic	Intergenic	-10076	NM_011737	22625	Mm.246566	NM_011737	ENSMUSG00000051590	Map3k19	Ysk4	mitogen-activated protein kinase kinase kinase 19	protein-coding
1916	chr1	191592030	191593009	+	7.81	8.73	4.58	4.15	7.27e-30	4.45e-28	0	NA	intron (NM_178632	intron 4 of 19)	intron (NM_178632	intron 4 of 19)	16883	NM_001306203	77065	Mm.338175	NM_178632	ENSMUSG00000037461	Ints7	5930412E23Rik|int7	integrator complex subunit 7	protein-coding
2279	chr12	70890735	70891915	+	7.86	8.78	4.64	4.15	4.62e-28	2.38e-26	0	NA	intron (NM_028127	intron 10 of 13)	intron (NM_028127	intron 10 of 13)	-46532	NM_019785	56444	Mm.29317	NM_019785	ENSMUSG00000021076	Actr10	Actr11|Arp11	ARP10 actin-related protein 10	protein-coding
2750	chr1	40358554	40359207	+	7.71	8.64	4.49	4.15	2.69e-26	1.15e-24	0	NA	intron (NM_001356478	intron 9 of 10)	intron (NM_001356478	intron 9 of 10)	34291	NM_133193	107527	Mm.155583	NM_133193	ENSMUSG00000070942	Il1rl2	AI481289|AW551444|IL-1Rrp2	interleukin 1 receptor-like 2	protein-coding
3084	chr2	168549226	168549928	+	7.58	8.51	4.35	4.15	3.56e-25	1.35e-23	0	NA	intron (NM_001037177	intron 3 of 6)	intron (NM_001037177	intron 3 of 6)	40788	NM_001291179	18019	Mm.116802	NM_010899	ENSMUSG00000027544	Nfatc2	AI607462|NF-ATc2|NF-ATp|NFAT1|NFAT1-D|Nfatp	nuclear factor of activated T cells	cytoplasmic	calcineurin dependent 2	protein-coding
4508	chr15	27418492	27419183	+	7.14	8.06	3.91	4.15	9.38e-22	2.44e-20	0	NA	Intergenic	Intergenic	-47840	NM_020332	11732	Mm.265264	NM_020332	ENSMUSG00000022265	Ank	Ankh|D15Ertd221e|ank|mKIAA1581	progressive ankylosis	protein-coding
4551	chr6	98775526	98776356	+	7.09	8.01	3.87	4.15	1.13e-21	2.92e-20	0	NA	Intergenic	Intergenic	252357	NM_001197322	108655	Mm.234965	NM_053202	ENSMUSG00000030067	Foxp1	3110052D19Rik|4932443N09Rik|AI461938|AW494214	forkhead box P1	protein-coding
6710	chr17	64193022	64193534	+	6.8	7.72	3.57	4.15	1.8e-18	3.14e-17	0	NA	Intergenic	Intergenic	138605	NM_144859	224938	Mm.489681	NM_144859	ENSMUSG00000024083	Pja2	AI447901|AL022700|Neurodap1|mKIAA0438	praja ring finger ubiquitin ligase 2	protein-coding
6905	chr15	11168853	11169458	+	7.06	7.98	3.83	4.15	3.31e-18	5.62e-17	0	NA	intron (NM_175501	intron 3 of 23)	intron (NM_175501	intron 3 of 23)	104382	NM_175501	239337	Mm.224825	NM_175501	ENSMUSG00000047497	Adamts12	ADAMTS-12|AI605170	a disintegrin-like and metallopeptidase (reprolysin type) with thrombospondin type 1 motif	12	protein-coding
7306	chr8	114634159	114634516	+	6.49	7.41	3.26	4.15	9.91e-18	1.59e-16	0	NA	intron (NM_019573	intron 5 of 8)	intron (NM_019573	intron 5 of 8)	194685	NM_019573	80707	Mm.440420	NM_019573	ENSMUSG00000004637	Wwox	5330426P09Rik|9030416C10Rik|WOX1	WW domain-containing oxidoreductase	protein-coding
8364	chr1	92799592	92800176	+	6.58	7.5	3.35	4.15	1.25e-16	1.75e-15	0	NA	Intergenic	Intergenic	-31761	NM_016696	14733	Mm.297976	NM_016696	ENSMUSG00000034220	Gpc1	AI462976	glypican 1	protein-coding
9804	chr12	75702783	75703249	+	6.38	7.3	3.15	4.15	2.34e-15	2.8e-14	0	NA	Intergenic	B1F|SINE|Alu	32713	NM_030750	81535	Mm.280199	NM_030750	ENSMUSG00000021054	Sgpp1	AI463453|SPP|SPP1|Spph1	sphingosine-1-phosphate phosphatase 1	protein-coding
11767	chr15	66875707	66876336	+	6.33	7.25	3.1	4.15	5.01e-14	4.99e-13	0	NA	Intergenic	Intergenic	-15372	NM_018865	22402	Mm.10222	NM_018865	ENSMUSG00000005124	Wisp1	AW146261|CCN4|Elm1	WNT1 inducible signaling pathway protein 1	protein-coding
12999	chrX	157612806	157613353	+	6.32	7.24	3.1	4.15	2.92e-13	2.64e-12	0	NA	Intergenic	Intergenic	-14364	NM_172307	270669	Mm.37577	NM_172307	ENSMUSG00000046873	Mbtps2	9630032G22Rik|AI662535	membrane-bound transcription factor peptidase	site 2	protein-coding
16004	chr12	82154571	82154991	+	5.69	6.61	2.47	4.15	8.36e-12	6.12e-11	0	NA	Intergenic	Intergenic	-15235	NM_001167983	217692	Mm.261333	NM_172579	ENSMUSG00000042700	Sipa1l1	4931426N11Rik|AW213287|Spar|mKIAA0440	signal-induced proliferation-associated 1 like 1	protein-coding
16196	chr16	23423817	23424228	+	5.87	6.79	2.64	4.15	1.02e-11	7.39e-11	0	NA	Intergenic	Intergenic	-5111	NM_001004151	239766	Mm.208751	NM_001004151	ENSMUSG00000033383	Rtp1	Gm1766|Gm604	receptor transporter protein 1	protein-coding
16662	chr7	79756481	79756893	+	5.69	6.61	2.46	4.15	1.58e-11	1.11e-10	0	NA	intron (NM_001037927	intron 5 of 17)	L1MC3|LINE|L1	13524	NM_001037927	626359	Mm.387216	NM_001037927	ENSMUSG00000039099	Wdr93	EG626359	WD repeat domain 93	protein-coding
16912	chr9	64202376	64202749	+	5.7	6.62	2.47	4.15	1.98e-11	1.38e-10	0	NA	intron (NM_008927	intron 5 of 10)	MER58B|DNA|hAT-Charlie	23265	NM_183316	330959	Mm.24082	NM_183316	ENSMUSG00000032398	Snapc5	2010103A03Rik	small nuclear RNA activating complex	polypeptide 5	protein-coding
17182	chr12	35742684	35743058	+	5.75	6.67	2.52	4.15	2.54e-11	1.74e-10	0	NA	Intergenic	Intergenic	-47753	NR_045050	71581	Mm.100110	NR_045050	ENSMUSG00000113985	9130015A21Rik	100043575|Gm4527	RIKEN cDNA 9130015A21 gene	ncRNA
19899	chr19	27509072	27509489	+	5.46	6.38	2.24	4.15	2.37e-10	1.39e-09	0	NA	Intergenic	Intergenic	79243	NR_027987	107372	Mm.17942	NM_175354		C030016D13Rik	AW413347	RIKEN cDNA C030016D13 gene	ncRNA
26961	chr7	100348422	100348754	+	5.19	6.11	1.95	4.15	1.69e-08	7.34e-08	0	NA	intron (NM_028292	intron 3 of 13)	intron (NM_028292	intron 3 of 13)	23308	NM_028292	72590	Mm.177502	NM_028292	ENSMUSG00000030718	Ppme1	1110069N17Rik|2700017M01Rik|PME-1|Pme1	protein phosphatase methylesterase 1	protein-coding
28522	chr8	110575986	110576313	+	4.93	5.85	1.69	4.15	3.61e-08	1.48e-07	0	NA	intron (NM_172916	intron 67 of 86)	intron (NM_172916	intron 67 of 86)	-42418	NM_146216	234729	Mm.274894	NM_146216	ENSMUSG00000010936	Vac14	AA959718|BC032215|D8Wsu151e|Tax1bp2|Trx|ingls	Vac14 homolog (S. cerevisiae)	protein-coding
32662	chrX	134299382	134299684	+	4.73	5.66	1.51	4.15	2.2e-07	7.88e-07	0	NA	intron (NM_026239	intron 1 of 1)	intron (NM_026239	intron 1 of 1)	4308	NM_026239	67564	Mm.41489	NM_026239	ENSMUSG00000033578	Tmem35a	9030603L14Rik|AI841526|PMP52|Tmem35	transmembrane protein 35A	protein-coding
35905	chr16	8539596	8539846	+	4.67	5.59	1.45	4.15	7.5e-07	2.45e-06	0	NA	intron (NM_001170978	intron 1 of 14)	intron (NM_001170978	intron 1 of 14)	26292	NM_001170978	268860	Mm.259315	NM_172961	ENSMUSG00000057880	Abat	9630038C02Rik|AI255750|Gabaat|Gabat|Gm9851|I54|Laibat|X61497	4-aminobutyrate aminotransferase	protein-coding
45309	chr19	30150047	30150256	+	4.2	5.12	0.97	4.15	1.27e-05	3.29e-05	0	NA	intron (NM_138595	intron 4 of 24)	intron (NM_138595	intron 4 of 24)	25290	NM_138595	104174	Mm.274852	NM_138595	ENSMUSG00000024827	Gldc	D030049L12Rik|D19Wsu57e|b2b2679Clo	glycine decarboxylase	protein-coding
62029	chr8	11711162	11711705	+	6.19	7.11	2.95	4.15	0.000447	0.000844	0.000844	NA	Intergenic	Intergenic	-16672	NM_001113517	54126	Mm.244068	NM_017402	ENSMUSG00000031511	Arhgef7	Cool|PIX|Pak3bp|betaPix|betaPix-b|betaPix-c|cool-1|mKIAA0142|p85Cool1|p85SPR	Rho guanine nucleotide exchange factor (GEF7)	protein-coding
67844	chr6	98770062	98770350	+	5.54	6.46	2.31	4.15	0.00126	0.00218	0.00218	NA	Intergenic	Intergenic	258092	NM_001197322	108655	Mm.234965	NM_053202	ENSMUSG00000030067	Foxp1	3110052D19Rik|4932443N09Rik|AI461938|AW494214	forkhead box P1	protein-coding
74451	chr3	96924593	96925121	+	6.02	6.94	2.8	4.15	0.00374	0.00589	0.00589	NA	intron (NM_008123	intron 1 of 1)	intron (NM_008123	intron 1 of 1)	1194	NM_008123	14616	Mm.258183	NM_008123	ENSMUSG00000049908	Gja8	Aey5|Cnx50|Cx50|Lop10	gap junction protein	alpha 8	protein-coding
361	chr16	15252681	15253641	+	8.45	9.37	5.23	4.14	5.37e-49	1.74e-46	0	NA	Intergenic	Intergenic	341357	NM_023585	70620	Mm.235407	NM_023585	ENSMUSG00000022674	Ube2v2	1110021H13Rik|4632410D19Rik|5730524P06Rik|6820402M05|AI848315|C81524|MMS2	ubiquitin-conjugating enzyme E2 variant 2	protein-coding
1176	chr8	11767146	11768266	+	7.96	8.88	4.74	4.14	4.69e-35	4.67e-33	0	NA	intron (NM_017402	intron 1 of 19)	RMER15|LTR|ERVL	9376	NM_001113518	54126	Mm.244068	NM_017402	ENSMUSG00000031511	Arhgef7	Cool|PIX|Pak3bp|betaPix|betaPix-b|betaPix-c|cool-1|mKIAA0142|p85Cool1|p85SPR	Rho guanine nucleotide exchange factor (GEF7)	protein-coding
1384	chr16	28963884	28965023	+	7.8	8.72	4.57	4.14	2.56e-33	2.17e-31	0	NA	Intergenic	RMER15|LTR|ERVL	-34755	NM_177718	239796	Mm.155887	NM_177718	ENSMUSG00000051065	Mb21d2	1600021P15Rik|A430031N04|C87006	Mab-21 domain containing 2	protein-coding
1522	chr2	101862159	101863300	+	7.7	8.62	4.48	4.14	2.92e-32	2.25e-30	0	NA	intron (NM_001355625	intron 1 of 8)	intron (NM_001355625	intron 1 of 8)	20298	NM_001355625	72446	Mm.24138	NM_175181	ENSMUSG00000032841	Prr5l	2600010E01Rik|4833411O04Rik|Protor-2|Protor2	proline rich 5 like	protein-coding
2170	chr13	3669645	3670655	+	7.64	8.56	4.42	4.14	1.29e-28	6.98e-27	0	NA	Intergenic	Intergenic	36118	NM_001267724	142688	Mm.253061	NM_178283	ENSMUSG00000033781	Asb13	2210015B19Rik|6430573K02Rik|Asb-13|C85285	ankyrin repeat and SOCS box-containing 13	protein-coding
3003	chr2	126309728	126310555	+	7.43	8.35	4.21	4.14	1.69e-25	6.59e-24	0	NA	Intergenic	Intergenic	158000	NM_001355583	69185	Mm.29019	NM_026981	ENSMUSG00000023330	Dtwd1	1810033A06Rik	DTW domain containing 1	protein-coding
3247	chr4	123792478	123793120	+	7.18	8.1	3.96	4.14	8.97e-25	3.24e-23	0	NA	intron (NM_183163	intron 1 of 7)	L2a|LINE|L2	4924	NM_183163	230726	Mm.37334	NM_183163	ENSMUSG00000043333	Rhbdl2	9130416B15|RRP2	rhomboid like 2	protein-coding
3564	chr1	161046881	161047638	+	7.11	8.03	3.89	4.14	6.76e-24	2.23e-22	0	NA	intron (NM_172644	intron 12 of 16)	MTC|LTR|ERVL-MaLR	9167	NR_028543	100217446		NR_028543	ENSMUSG00000064968	Snord47	MBII-96	small nucleolar RNA	C/D box 47	snoRNA
4269	chr12	69419085	69419966	+	7.12	8.04	3.91	4.14	3.48e-22	9.55e-21	0	NA	Intergenic	PB1D11|SINE|Alu	47375	NM_007481	11845	Mm.27308	NM_007481	ENSMUSG00000044147	Arf6	AI788669|AW496366	ADP-ribosylation factor 6	protein-coding
5912	chr18	57414340	57415263	+	6.87	7.79	3.65	4.14	1.78e-19	3.54e-18	0	NA	non-coding (NR_152223	exon 4 of 4)	non-coding (NR_152223	exon 4 of 4)	9386	NR_152223	100503007	Mm.238087	NR_152223		Gm19500	-	predicted gene	19500	ncRNA
6302	chr18	36708270	36709291	+	7.28	8.2	4.07	4.14	5.75e-19	1.07e-17	0	NA	Intergenic	B4|SINE|B4	-12855	NM_172831	240216	Mm.252323	NM_172831	ENSMUSG00000044719	E230025N22Rik	EG240216	Riken cDNA E230025N22 gene	protein-coding
7207	chrX	139812533	139813324	+	6.7	7.62	3.48	4.14	7.58e-18	1.23e-16	0	NA	Intergenic	Intergenic	12120	NM_016675	12738	Mm.117068	NM_016675	ENSMUSG00000047230	Cldn2	AL022813	claudin 2	protein-coding
8030	chr6	126484833	126485318	+	6.52	7.44	3.3	4.14	5.83e-17	8.51e-16	0	NA	Intergenic	Intergenic	50480	NM_145983	16493	Mm.222831	NM_145983	ENSMUSG00000045534	Kcna5	Kv1.5	potassium voltage-gated channel	shaker-related subfamily	member 5	protein-coding
8195	chr1	59579944	59580755	+	6.42	7.34	3.2	4.14	8.53e-17	1.22e-15	0	NA	intron (NM_001013771	intron 11 of 19)	intron (NM_001013771	intron 11 of 19)	56055	NM_001357842	381260	Mm.486706	NM_001013771	ENSMUSG00000047361	Gm973	AW554518	predicted gene 973	protein-coding
8683	chr2	50493878	50494392	+	6.66	7.58	3.44	4.14	2.51e-16	3.39e-15	0	NA	Intergenic	Intergenic	139110	NR_154590	102634280		NR_154590		Gm48908	-	predicted gene 48908	ncRNA
9286	chr1	136652213	136652765	+	6.43	7.35	3.21	4.14	8.55e-16	1.08e-14	0	NA	Intergenic	Intergenic	27588	NM_001160251	226442	Mm.62521	NM_177643	ENSMUSG00000041483	Zfp281	Znf281	zinc finger protein 281	protein-coding
9520	chr14	65636844	65637427	+	6.23	7.15	3.01	4.14	1.34e-15	1.65e-14	0	NA	intron (NM_001195674	intron 13 of 18)	ORR1E|LTR|ERVL-MaLR	-29268	NM_001168318	71145	Mm.83840	NM_028903	ENSMUSG00000022032	Scara5	4932433F15Rik|4933425F03Rik|AV278087|Tesr	scavenger receptor class A	member 5	protein-coding
9870	chr15	81253496	81253996	+	6.33	7.25	3.11	4.14	2.69e-15	3.2e-14	0	NA	Intergenic	Intergenic	-1884	NR_077230	78102	Mm.296832	NR_077229	ENSMUSG00000115970	8430426J06Rik	-	RIKEN cDNA 8430426J06 gene	ncRNA
10000	chr16	31597254	31597753	+	6.56	7.48	3.34	4.14	3.29e-15	3.85e-14	0	NA	Intergenic	Intergenic	-20630	NM_001357871	224098	Mm.125439	NM_001357870		Gm536	Gm1777	predicted gene 536	protein-coding
11084	chr8	11136626	11137048	+	6.14	7.06	2.91	4.14	1.86e-14	1.97e-13	0	NA	Intergenic	Intergenic	-128407	NM_001081212	384783	Mm.407207	NM_001081212	ENSMUSG00000038894	Irs2	Irs-2	insulin receptor substrate 2	protein-coding
12029	chr12	5770345	5770916	+	6.33	7.25	3.11	4.14	7.34e-14	7.15e-13	0	NA	Intergenic	Intergenic	394128	NR_015579	72669	Mm.10434	NM_028318		2810032G03Rik	AI461720	RIKEN cDNA 2810032G03 gene	ncRNA
15925	chr19	28525335	28525935	+	5.96	6.88	2.74	4.14	7.63e-12	5.62e-11	0	NA	intron (NM_175459	intron 4 of 10)	intron (NM_175459	intron 4 of 10)	-152589	NR_045330	320176	Mm.406716	NR_045330	ENSMUSG00000097735	D930032P07Rik	-	RIKEN cDNA D930032P07 gene	ncRNA
20855	chr9	59527979	59528498	+	5.34	6.26	2.12	4.14	4.62e-10	2.6e-09	0	NA	Intergenic	Intergenic	-2737	NM_178388	73893	Mm.216135	NM_178388	ENSMUSG00000049526	Tmem202	4930425N13Rik	transmembrane protein 202	protein-coding
22121	chr10	78722047	78722406	+	5.33	6.25	2.11	4.14	1.06e-09	5.64e-09	0	NA	Intergenic	Intergenic	-3933	NM_009809	12365	Mm.20940	NM_009809	ENSMUSG00000005355	Casp14	MICE|mini-ICE	caspase 14	protein-coding
23585	chr9	31241248	31241576	+	5.33	6.25	2.11	4.14	2.66e-09	1.32e-08	0	NA	Intergenic	Intergenic	-29564	NM_001102456	11804	Mm.19133	NM_009691	ENSMUSG00000031996	Aplp2	AI790698|APLP-2|CDEBP	amyloid beta (A4) precursor-like protein 2	protein-coding
34923	chr18	70198641	70198879	+	4.75	5.67	1.53	4.14	5.24e-07	1.76e-06	0	NA	Intergenic	Intergenic	45824	NM_029346	75577	Mm.58214	NM_029346	ENSMUSG00000024512	Dynap	2310002L13Rik	dynactin associated protein	protein-coding
44471	chr19	28291513	28292350	+	7.41	8.33	4.2	4.14	1.01e-05	2.67e-05	0	NA	intron (NM_175459	intron 8 of 10)	intron (NM_175459	intron 8 of 10)	-280765	NM_001166414	19726	Mm.313321	NM_011265	ENSMUSG00000040929	Rfx3	C230093O12Rik|MRFX3	regulatory factor X	3 (influences HLA class II expression)	protein-coding
44749	chr13	11193325	11193564	+	4.23	5.15	1.01	4.14	1.09e-05	2.87e-05	0	NA	Intergenic	Intergenic	-328608	NR_027813	664793	Mm.410565	NR_027813	ENSMUSG00000113593	Zp4-ps	EG664793|Zp4|Zpb	zona pellucida glycoprotein 4	pseudogene	pseudo
44909	chr12	98302322	98302522	+	4.23	5.15	1.01	4.14	1.15e-05	2.99e-05	0	NA	Intergenic	MLT1J-int|LTR|ERVL-MaLR	33787	NM_008152	14744	Mm.378924	NM_008152	ENSMUSG00000021886	Gpr65	Dig1|Gpcr25|TDAG8	G-protein coupled receptor 65	protein-coding
45698	chrX	142848141	142848361	+	4.18	5.1	0.97	4.14	1.4e-05	3.58e-05	0	NA	Intergenic	Charlie15b|DNA|hAT-Charlie	109251	NR_030523	723976		NR_030523	ENSMUSG00000076011	Mir652	Mirn652|miRX|mmu-mir-652	microRNA 652	ncRNA
50063	chr8	79559398	79559952	+	6.67	7.59	3.45	4.14	3.95e-05	9.25e-05	0	NA	Intergenic	Intergenic	-80001	NM_001081164	73945	Mm.34348	NM_001081164	ENSMUSG00000036990	Otud4	4930431L18Rik|AI449692|D8Ertd69e|mKIAA1046	OTU domain containing 4	protein-coding
58891	chr14	105448802	105449488	+	6.46	7.38	3.24	4.14	0.000246	0.000489	0.000489	NA	Intergenic	Intergenic	21586	NR_045859	71362	Mm.410781	NR_045859	ENSMUSG00000115548	5430440P10Rik	-	RIKEN cDNA 5430440P10 gene	ncRNA
219	chr4	63752239	63753766	+	8.85	9.77	5.64	4.13	1.14e-55	6.12e-53	0	NA	Intergenic	Intergenic	-7889	NM_177371	326623	Mm.208152	NM_177371	ENSMUSG00000050395	Tnfsf15	Tl1|Tl1a|Tnlg1b|Vegi	tumor necrosis factor (ligand) superfamily	member 15	protein-coding
1478	chr5	4017542	4018598	+	8.15	9.07	4.94	4.13	1.35e-32	1.07e-30	0	NA	intron (NM_194462	intron 21 of 47)	MERVL-int|LTR|ERVL	86627	NM_020010	13121	Mm.140158	NM_020010	ENSMUSG00000001467	Cyp51	AI426508|CYPLI|Cyp51a1|Ldm|P450-14DM|P450LI	cytochrome P450	family 51	protein-coding
1523	chr4	88955463	88957023	+	8.23	9.15	5.03	4.13	2.94e-32	2.26e-30	0	NA	Intergenic	Intergenic	-14201	NR_132734	106557447	Mm.484668	NR_132734		LOC106557447	-	uncharacterized LOC106557447	ncRNA
2328	chr11	40402255	40402966	+	7.57	8.49	4.37	4.13	7.02e-28	3.53e-26	0	NA	Intergenic	Intergenic	290072	NM_134017	108645	Mm.293771	NM_134017	ENSMUSG00000042032	Mat2b	1110064C04Rik|2410018D16Rik|AI182287|AU022853|MAT-II|MATIIbeta|TGR	methionine adenosyltransferase II	beta	protein-coding
2515	chr4	63668164	63668787	+	7.5	8.42	4.29	4.13	3.88e-27	1.81e-25	0	NA	Intergenic	Intergenic	34054	NR_151544	102632940	Mm.399154	NR_151544	ENSMUSG00000086817	Gm11482	-	predicted gene 11482	ncRNA
3371	chr8	128164798	128165541	+	7.27	8.19	4.06	4.13	1.96e-24	6.81e-23	0	NA	Intergenic	Intergenic	113056	NR_105822	102465212		NR_105822	ENSMUSG00000099326	Mir21c	Gm28013|mmu-mir-21c	microRNA 21c	ncRNA
3595	chr11	75405963	75406619	+	7.31	8.23	4.1	4.13	8.2e-24	2.67e-22	0	NA	TTS (NM_001102611)	TTS (NM_001102611)	16332	NM_011340	20317	Mm.2044	NM_011340	ENSMUSG00000000753	Serpinf1	AI195227|EPC-1|Pedf|Pedfl|Sdf3	serine (or cysteine) peptidase inhibitor	clade F	member 1	protein-coding
5404	chr18	42307974	42308443	+	7.02	7.94	3.81	4.13	3.57e-20	7.74e-19	0	NA	intron (NM_172626	intron 8 of 19)	intron (NM_172626	intron 8 of 19)	32855	NM_172626	225432	Mm.329400	NM_172626	ENSMUSG00000024491	Rbm27	A730010I06|AI043120|Psc1|mKIAA1311	RNA binding motif protein 27	protein-coding
5525	chr4	44281566	44282436	+	7.13	8.05	3.92	4.13	5.2e-20	1.1e-18	0	NA	Intergenic	Intergenic	-18916	NM_010790	17279	Mm.268668	NM_010790	ENSMUSG00000035683	Melk	AI327312|MPK38|mKIAA0175	maternal embryonic leucine zipper kinase	protein-coding
5895	chr14	64368141	64368622	+	6.7	7.62	3.49	4.13	1.7e-19	3.38e-18	0	NA	intron (NM_001253715	intron 1 of 4)	intron (NM_001253715	intron 1 of 4)	48575	NM_001253716	110265	Mm.26713	NM_026322	ENSMUSG00000054733	Msra	2310045J23Rik|6530413P12Rik|MSR-A	methionine sulfoxide reductase A	protein-coding
5935	chr8	34760464	34761038	+	6.95	7.87	3.74	4.13	1.88e-19	3.72e-18	0	NA	Intergenic	Intergenic	-46859	NM_176933	319520	Mm.170276	NM_176933	ENSMUSG00000031530	Dusp4	2700078F24Rik|AI844617|BB104621|E130306H24Rik|MKP2	dual specificity phosphatase 4	protein-coding
6802	chr16	45887566	45888459	+	7.22	8.14	4.01	4.13	2.36e-18	4.07e-17	0	NA	Intergenic	Intergenic	-43261	NM_001357078	208177	Mm.211477	NM_153412	ENSMUSG00000033149	Phldb2	AV253284|C820004H04Rik|LL5b|LL5beta	pleckstrin homology like domain	family B	member 2	protein-coding
[truncated: 115,696 more rows]
[truncated: 3 more columns]

## Sheet: Go_CultureOpen
Analysis Type:	PANTHER Overrepresentation Test (Released 20200728)
Annotation Version and Release Date:	GO Ontology database DOI: 10.5281/zenodo.3954044 Released 2020-07-16
[truncated: 398 more rows]

## Sheet: GO_CultureCloses
Analysis Type:	PANTHER Overrepresentation Test (Released 20200728)
[truncated: 196 more rows]
