# Supplementary figures and images for: Cardiac endothelial cells maintain open chromatin and expression of cardiomyocyte myofibrillar genes
Source: eLife journal article supplement (doi:10.7554/elife.55730), 2020-12-14

Figure 3 -- figure supplement 1

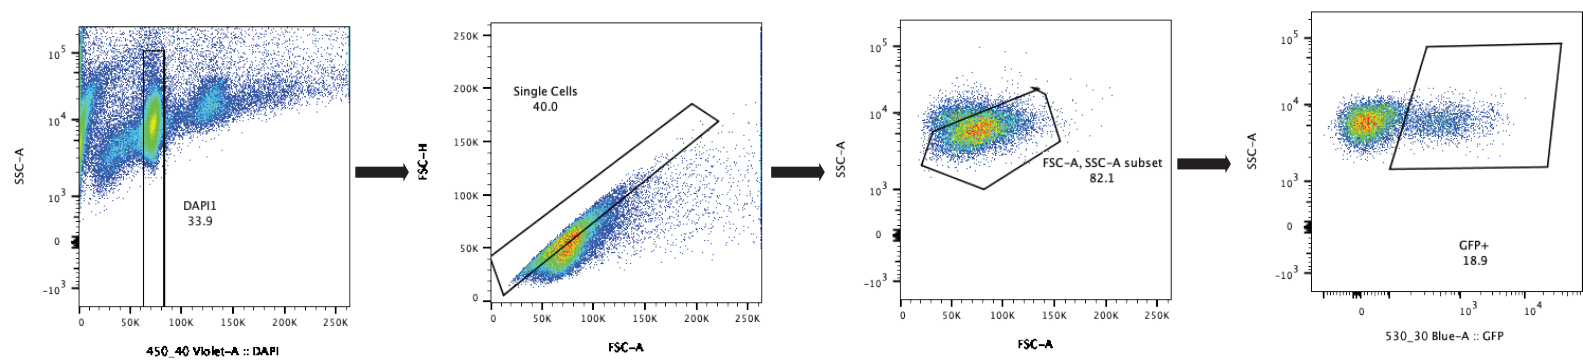

Supplement: supp [file elife-55730-supp-v1.zip › elife_poa_e55730_Figure_3_figure_supplement_1.pdf]

Figure 3 -- figure supplement 2

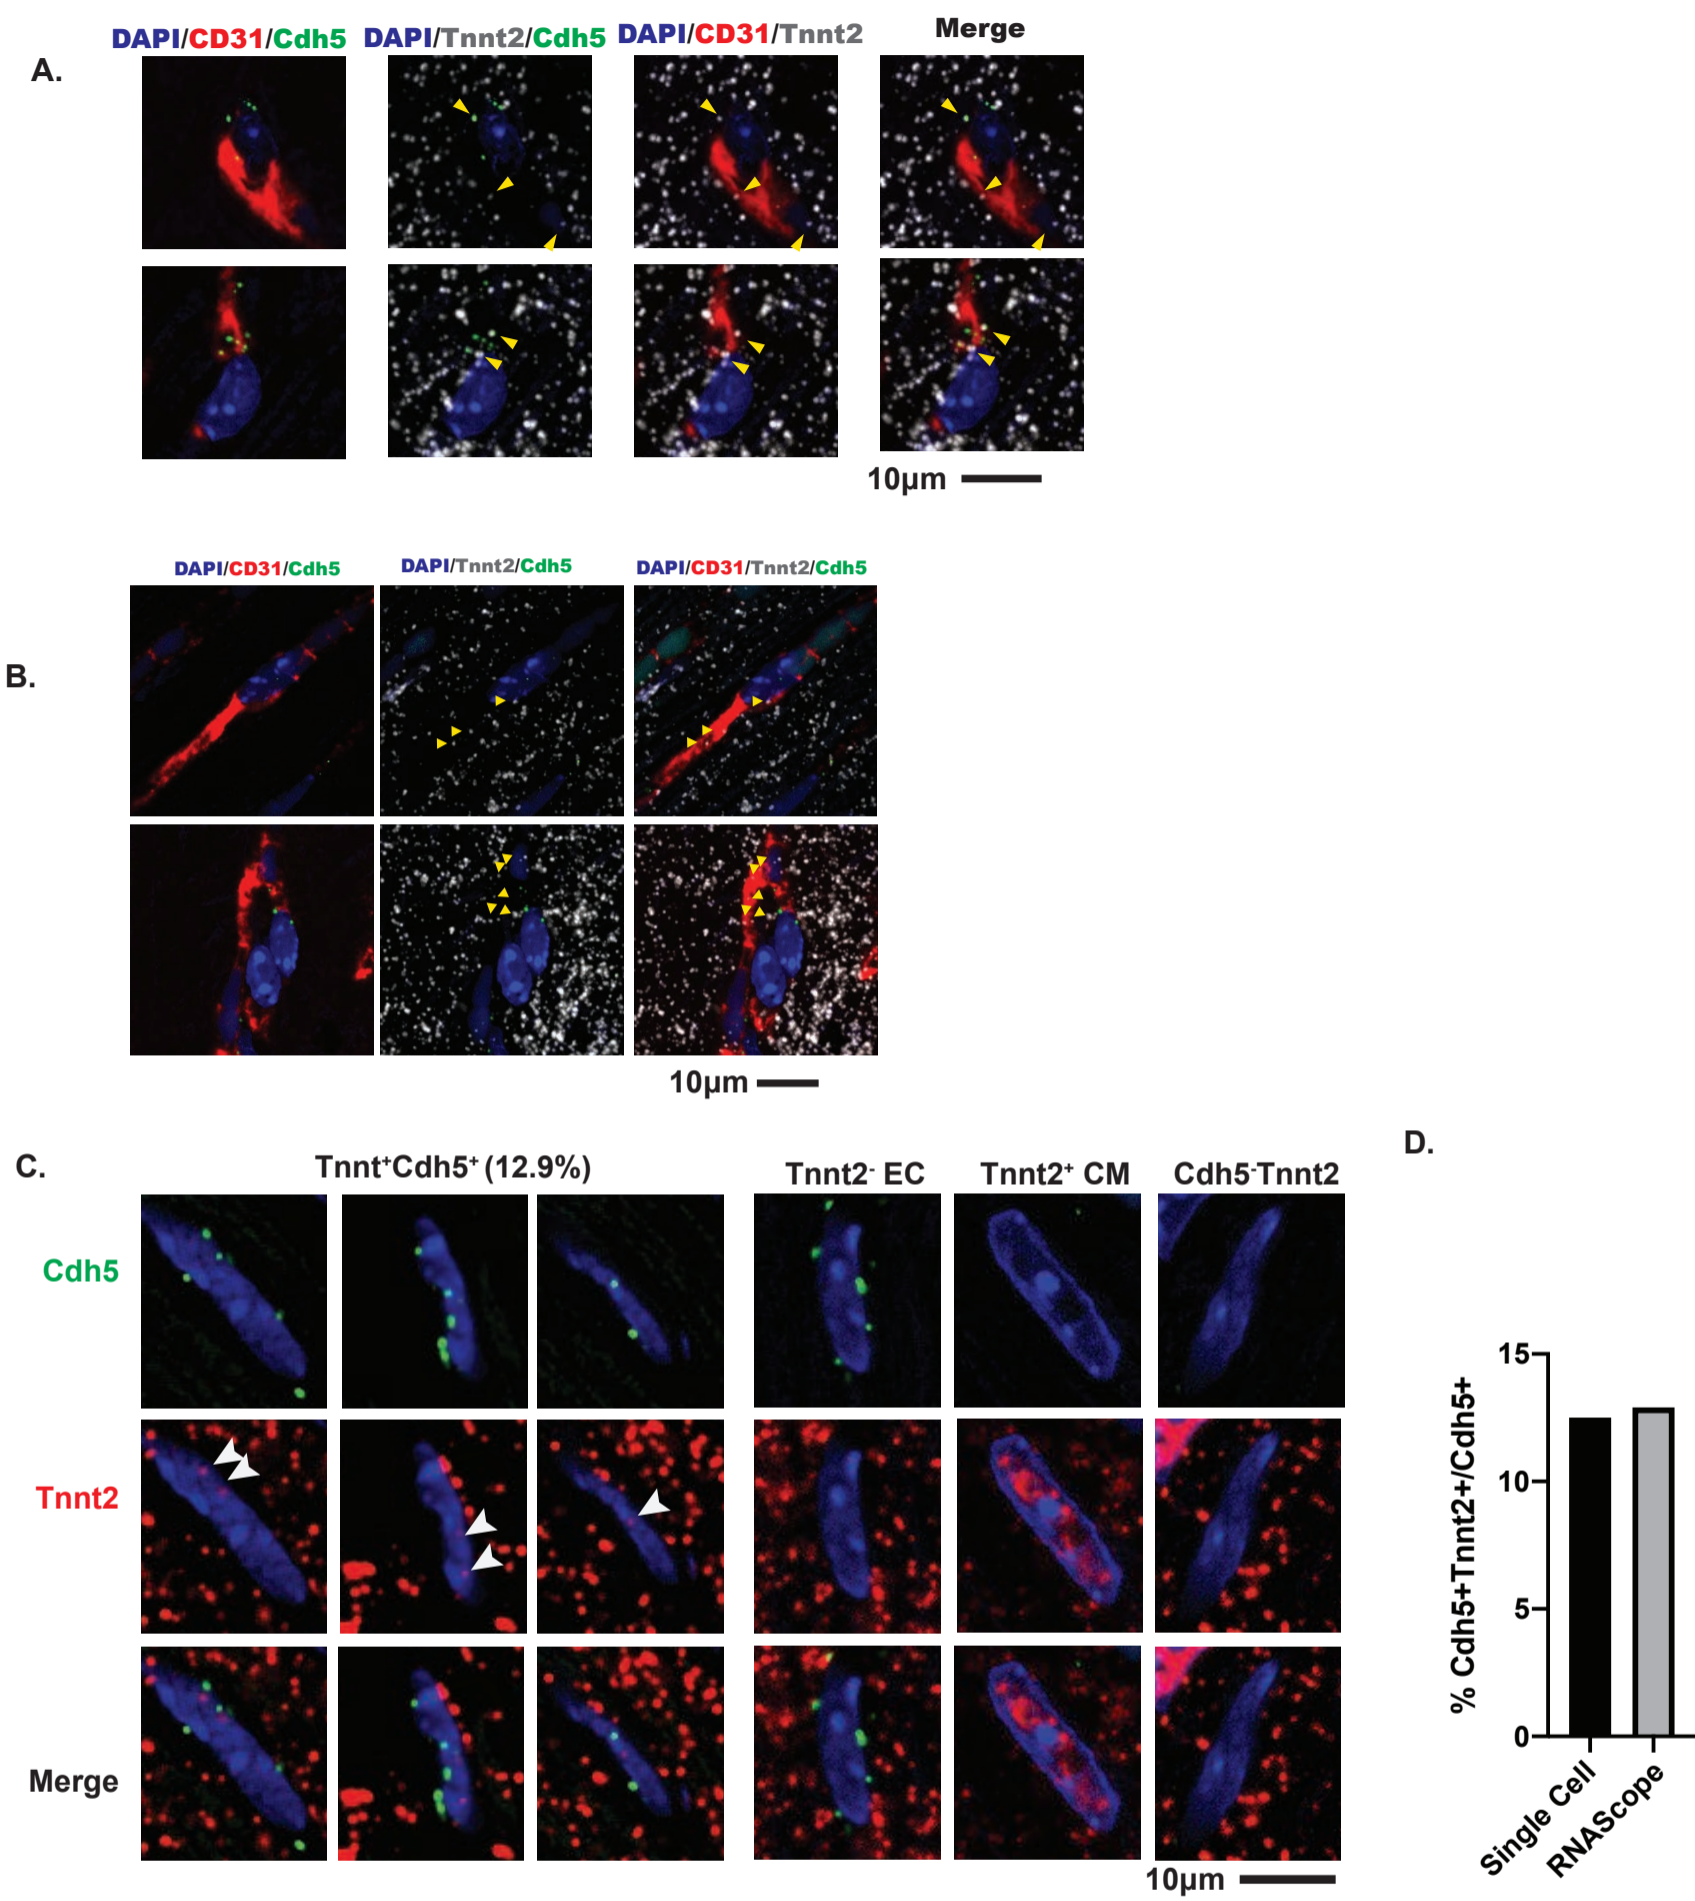

Supplement: supp [file elife-55730-supp-v1.zip › elife_poa_e55730_Figure_3_figure_supplement_2.pdf]

Figure 4 -- figure supplement 1

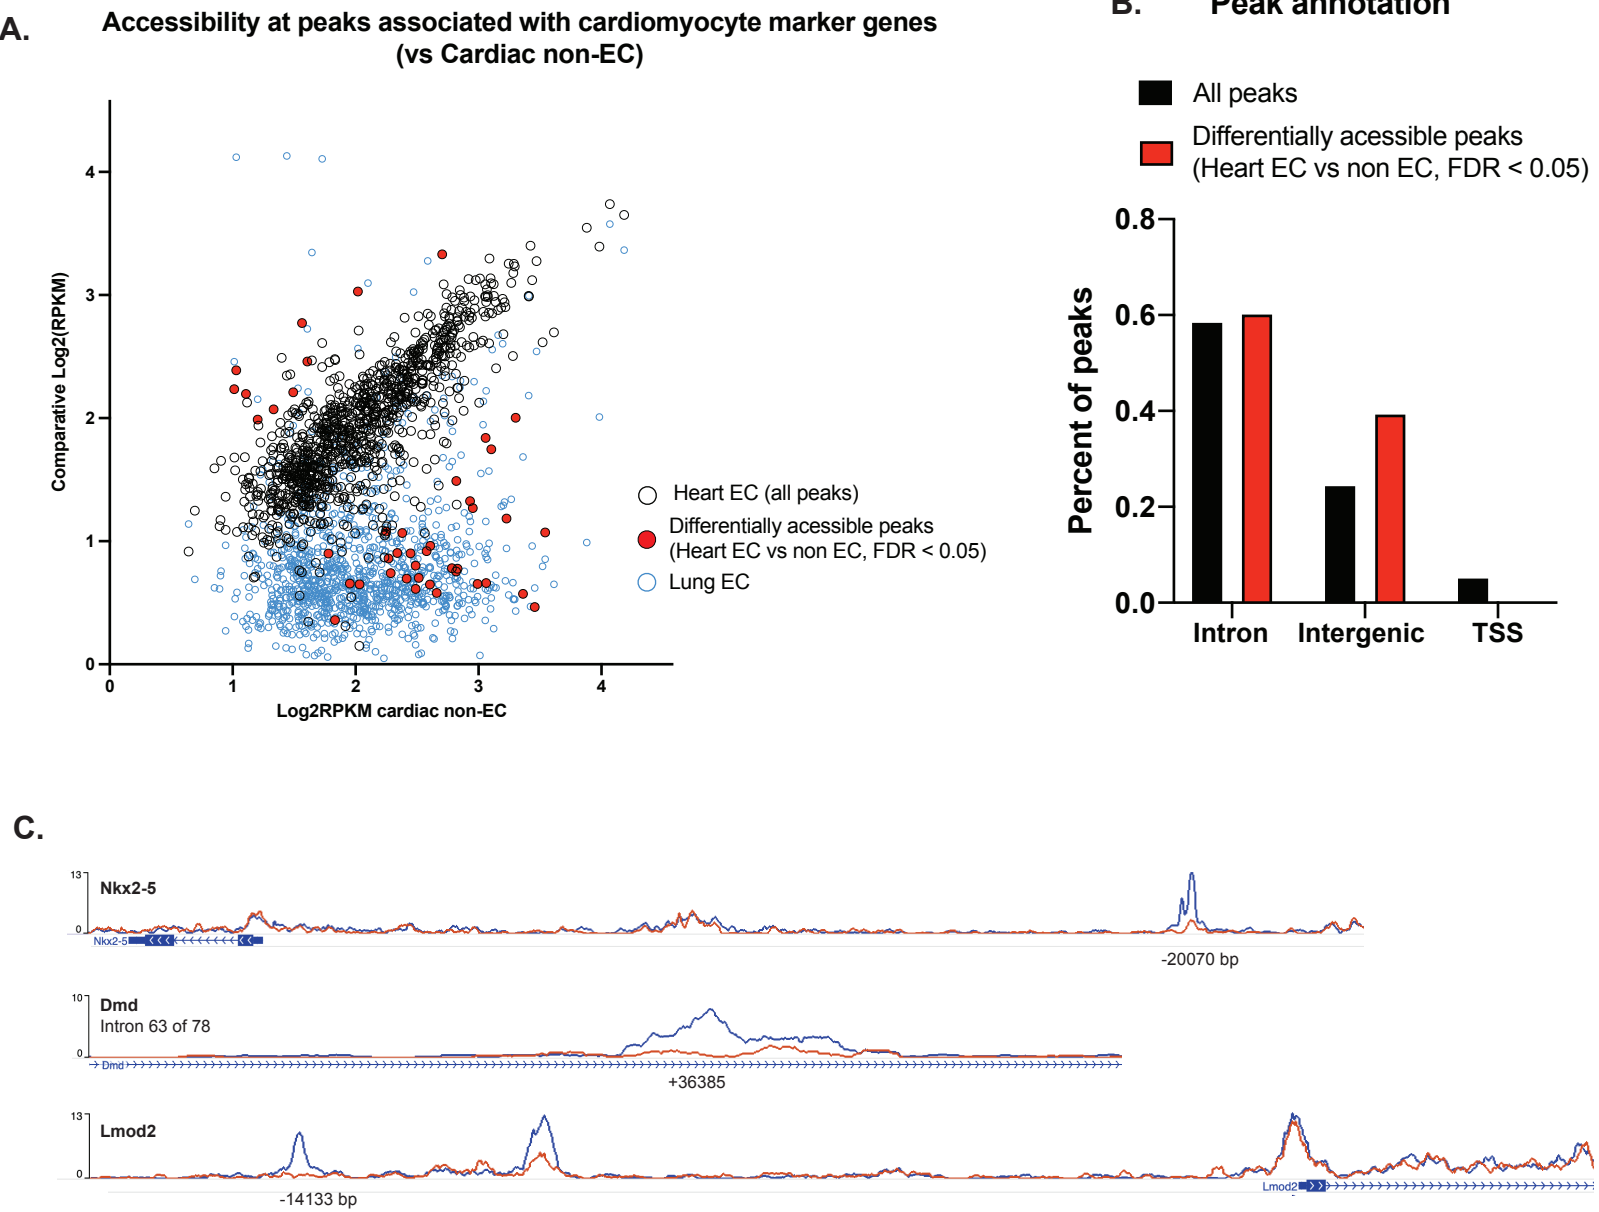

Supplement: supp [file elife-55730-supp-v1.zip › elife_poa_e55730_Figure_4_figure_supplement_1.pdf]
